# Supplementary material
Source: PubMed Central journal article supplement (PMC3140206)
Supplement: NIHMS308302-supplement-Suppl_Table_S1.pdf [file NIHMS308302-supplement-Suppl_Table_S1.pdf]

| NCBI<br>Gene ID | Gene<br>Symbol | Affy.<br>CD4+ | Agilent<br>CD4+ | Illumina<br>CD4+ | Nimbl.<br>CD4+ | Affy.<br>CD19+ | Agilent<br>CD19+ | Illumina<br>CD19+ | Nimbl.<br>CD19+ |
|-----------------|----------------|---------------|-----------------|------------------|----------------|----------------|------------------|-------------------|-----------------|
| 11287           | Pzp            | 7             | 2               | 30               | 33             | 6              | 3                | 29                | 56              |
| 11298           | Aanat          | 7             | 97              | 27               | 81             | 8              | 80               | 22                | 76              |
| 11302           | Aatk           | 21            | 3               | 26               | 165            | 19             | 4                | 26                | 210             |
| 11303           | Abca1          | 26            | 73              | 20               | 518            | 146            | 458              | 22                | 2979            |
| 11304           | Abca4          | 5             | 2               | 34               | 43             | 6              | 3                | 35                | 57              |
| 11305           | Abca2          | 111           | 258             | 100              | 73             | 54             | 108              | 54                | 42              |
| 11307           | Abcg1          | 158           | 745             | 1022             | 5630           | 119            | 567              | 688               | 3754            |
| 11308           | Abi1           | 452           | 1257            | 2068             | 5643           | 426            | 993              | 1952              | 5908            |
| 11350           | Abl1           | 108           | 143             | 43               | 1039           | 96             | 105              | 43                | 888             |
| 11352           | Abl2           | 83            | 8               | 26               | 30             | 109            | 5                | 20                | 40              |
| 11354           | Abpa           | 9             | 13              | 30               | 23             | 9              | 15               | 27                | 29              |
| 11363           | Acadl          | 48            | 101             | 40               | 4406           | 88             | 183              | 53                | 8112            |
| 11364           | Acadm          | 120           | 751             | 375              | 3178           | 130            | 799              | 361               | 2421            |
| 11370           | Acadvl         | 77            | 3222            | 938              | 891            | 67             | 1882             | 494               | 460             |
| 11409           | Acads          | 39            | 30              | 36               | 285            | 36             | 27               | 31                | 325             |
| 11416           | Slc33a1        | 31            | 25              | 24               | 315            | 29             | 20               | 27                | 266             |
| 11418           | Accn1          | 6             | 12              | 28               | 38             | 7              | 18               | 21                | 51              |
| 11419           | Accn2          | 12            | 5               | 38               | 68             | 11             | 4                | 36                | 68              |
| 11421           | Ace            | 8             | 82              | 37               | 57             | 8              | 74               | 41                | 54              |
| 11423           | Ache           | 6             | 11              | 31               | 84             | 6              | 7                | 31                | 82              |
| 11425           | Apoc4          | 17            | 5               | 26               | 37             | 16             | 6                | 31                | 52              |
| 11428           | Aco1           | 56            | 305             | 50               | 833            | 57             | 243              | 44                | 761             |
| 11429           | Aco2           | 192           | 2432            | 1043             | 2021           | 206            | 2390             | 975               | 1706            |
| 11430           | Acox1          | 58            | 478             | 38               | 1449           | 59             | 443              | 36                | 1509            |
| 11431           | Acp1           | 67            | 39              | 92               | 2479           | 114            | 56               | 149               | 3444            |
| 11432           | Acp2           | 22            | 51              | 85               | 876            | 15             | 25               | 61                | 443             |
| 11433           | Acp5           | 342           | 1051            | 64               | 9712           | 319            | 1042             | 52                | 8803            |
| 11434           | Acr            | 6             | 41              | 30               | 39             | 7              | 37               | 26                | 37              |
| 11435           | Chrna1         | 5             | 8               | 24               | 29             | 5              | 12               | 24                | 28              |
| 11438           | Chrna4         | 8             | 24              | 23               | 31             | 7              | 15               | 22                | 39              |
| 11440           | Chrna6         | 5             | 24              | 22               | 17             | 5              | 19               | 21                | 18              |
| 11441           | Chrna7         | 8             | 7               | 33               | 28             | 8              | 7                | 33                | 29              |
| 11443           | Chrnbl         | 13            | 13              | 32               | 101            | 22             | 31               | 75                | 280             |
| 11444           | Chrnbl         | 14            | 18              | 49               | 109            | 11             | 11               | 37                | 79              |
| 11447           | Chrnd          | 9             | 9               | 26               | 30             | 9              | 7                | 27                | 22              |
| 11448           | Chrne          | 12            | 57              | 36               | 32             | 10             | 89               | 35                | 86              |
| 11449           | Chrng          | 11            | 14              | 34               | 32             | 12             | 14               | 31                | 27              |
| 11451           | Acrv1          | 4             | 11              | 28               | 21             | 5              | 9                | 24                | 19              |
| 11459           | Acta1          | 23            | 8               | 29               | 93             | 21             | 7                | 27                | 103             |
| 11461           | Actb           | 6726          | 18266           | 12360            | 28251          | 6334           | 15073            | 10074             | 27201           |
| 11464           | Actc1          | 20            | 41              | 39               | 66             | 19             | 42               | 35                | 62              |
| 11468           | Actg2          | 6             | 497             | 38               | 1757           | 6              | 460              | 25                | 1591            |
| 11470           | Actl7a         | 15            | 32              | 31               | 60             | 18             | 23               | 30                | 81              |
| 11471           | Actl7b         | 23            | 11              | 31               | 29             | 23             | 12               | 29                | 23              |
| 11472           | Actn2          | 8             | 14              | 316              | 572            | 6              | 3                | 31                | 40              |
| 11474           | Actn3          | 10            | 3               | 39               | 44             | 10             | 3                | 37                | 45              |
| 11475           | Acta2          | 19            | 4818            | 31               | 39             | 13             | 5341             | 27                | 50              |
| 11477           | Acvr1          | 6             | 27              | 33               | 48             | 6              | 19               | 28                | 62              |
| 11479           | Acvr1b         | 114           | 688             | 149              | 254            | 75             | 450              | 99                | 196             |
| 11481           | Acvr2b         | 14            | 7               | 35               | 57             | 13             | 4                | 28                | 41              |
| 11482           | Acvrl1         | 54            | 60              | 72               | 675            | 18             | 5                | 28                | 68              |

| NCBI<br>Gene ID | Gene<br>Symbol | Affy.<br>CD4+ | Agilent<br>CD4+ | Illumina<br>CD4+ | Nimbl.<br>CD4+ | Affy.<br>CD19+ | Agilent<br>CD19+ | Illumina<br>CD19+ | Nimbl.<br>CD19+ |
|-----------------|----------------|---------------|-----------------|------------------|----------------|----------------|------------------|-------------------|-----------------|
| 11484           | Aspa           | 4             | 29              | 30               | 40             | 4              | 38               | 29                | 31              |
| 11486           | Ada            | 11            | 196             | 57               | 566            | 17             | 152              | 47                | 470             |
| 11487           | Adam10         | 191           | 11              | 74               | 77             | 225            | 11               | 75                | 61              |
| 11488           | Adam11         | 12            | 26              | 27               | 70             | 11             | 23               | 29                | 70              |
| 11489           | Adam12         | 6             | 2               | 32               | 39             | 6              | 6                | 31                | 33              |
| 11490           | Adam15         | 30            | 101             | 79               | 124            | 21             | 34               | 39                | 132             |
| 11491           | Adam17         | 110           | 241             | 311              | 6881           | 190            | 453              | 544               | 8173            |
| 11492           | Adam19         | 67            | 65              | 294              | 571            | 146            | 169              | 724               | 907             |
| 11495           | Adam2          | 5             | 24              | 23               | 31             | 5              | 23               | 21                | 30              |
| 11496           | Adam22         | 4             | 2               | 32               | 44             | 4              | 2                | 31                | 53              |
| 11497           | Adam3          | 6             | 42              | 23               | 27             | 6              | 18               | 26                | 31              |
| 11498           | Adam4          | 32            | 23              | 82               | 311            | 27             | 14               | 75                | 282             |
| 11499           | Adam5          | 4             | 8               | 29               | 27             | 4              | 12               | 26                | 38              |
| 11500           | Adam7          | 4             | 2               | 25               | 27             | 5              | 3                | 26                | 39              |
| 11501           | Adam8          | 13            | 110             | 41               | 143            | 11             | 68               | 35                | 114             |
| 11502           | Adam9          | 31            | 73              | 51               | 809            | 89             | 342              | 160               | 2858            |
| 11504           | Adamts1        | 6             | 14              | 23               | 44             | 5              | 13               | 24                | 36              |
| 11512           | Adcy6          | 70            | 479             | 265              | 2841           | 12             | 35               | 21                | 57              |
| 11513           | Adcy7          | 327           | 3634            | 1103             | 22063          | 302            | 3055             | 893               | 18887           |
| 11514           | Adcy8          | 5             | 3               | 31               | 27             | 6              | 3                | 30                | 21              |
| 11515           | Adcy9          | 12            | 69              | 40               | 150            | 12             | 68               | 37                | 132             |
| 11516           | Adcyap1        | 6             | 11              | 38               | 34             | 6              | 10               | 38                | 35              |
| 11517           | Adcyap1r1      | 7             | 17              | 42               | 51             | 8              | 55               | 32                | 60              |
| 11518           | Add1           | 429           | 725             | 2123             | 8160           | 316            | 381              | 1602              | 7174            |
| 11519           | Add2           | 8             | 13              | 38               | 37             | 8              | 11               | 35                | 46              |
| 11520           | Adfp           | 25            | 282             | 71               | 1352           | 18             | 263              | 64                | 1089            |
| 11522           | Adh1           | 52            | 188             | 104              | 2057           | 10             | 7                | 30                | 48              |
| 11529           | Adh7           | 6             | 2               | 32               | 60             | 7              | 3                | 30                | 61              |
| 11532           | Adh5           | 80            | 2457            | 207              | 2412           | 65             | 2132             | 135               | 1477            |
| 11534           | Adk            | 109           | 1002            | 507              | 3696           | 35             | 312              | 135               | 1265            |
| 11535           | Adm            | 9             | 22              | 29               | 48             | 15             | 123              | 80                | 166             |
| 11536           | Admr           | 7             | 5               | 45               | 25             | 7              | 3                | 42                | 16              |
| 11538           | Adnp           | 177           | 81              | 2342             | 7526           | 165            | 59               | 2149              | 5617            |
| 11539           | Adora1         | 7             | 35              | 27               | 23             | 7              | 48               | 34                | 24              |
| 11540           | Adora2a        | 37            | 598             | 24               | 707            | 31             | 498              | 23                | 449             |
| 11541           | Adora2b        | 8             | 5               | 23               | 41             | 9              | 6                | 19                | 27              |
| 11542           | Adora3         | 10            | 26              | 25               | 74             | 10             | 39               | 26                | 68              |
| 11544           | Adprh          | 56            | 1727            | 1783             | 282            | 71             | 1771             | 2033              | 301             |
| 11548           | Adra1b         | 7             | 7               | 29               | 66             | 8              | 5                | 24                | 62              |
| 11549           | Adra1a         | 8             | 20              | 34               | 38             | 7              | 18               | 41                | 35              |
| 11550           | Adra1d         | 19            | 86              | 33               | 47             | 18             | 94               | 29                | 67              |
| 11551           | Adra2a         | 12            | 16              | 24               | 50             | 8              | 16               | 25                | 45              |
| 11552           | Adra2b         | 7             | 14              | 32               | 57             | 8              | 25               | 30                | 67              |
| 11553           | Adra2c         | 7             | 3               | 39               | 36             | 7              | 5                | 30                | 41              |
| 11554           | Adrb1          | 19            | 43              | 36               | 94             | 17             | 58               | 35                | 71              |
| 11555           | Adrb2          | 161           | 257             | 364              | 464            | 262            | 443              | 607               | 684             |
| 11556           | Adrb3          | 5             | 6               | 29               | 21             | 5              | 7                | 24                | 62              |
| 11564           | Adsl           | 162           | 396             | 468              | 2894           | 133            | 334              | 283               | 1632            |
| 11565           | Adssl1         | 7             | 8               | 32               | 32             | 11             | 267              | 169               | 179             |
| 11567           | Avil           | 20            | 7               | 38               | 241            | 15             | 3                | 25                | 116             |
| 11568           | Aebp1          | 11            | 8               | 30               | 39             | 9              | 10               | 31                | 42              |

| NCBI<br>Gene ID | Gene<br>Symbol | Affy.<br>CD4+ | Agilent<br>CD4+ | Illumina<br>CD4+ | Nimbl.<br>CD4+ | Affy.<br>CD19+ | Agilent<br>CD19+ | Illumina<br>CD19+ | Nimbl.<br>CD19+ |
|-----------------|----------------|---------------|-----------------|------------------|----------------|----------------|------------------|-------------------|-----------------|
| 11569           | Aebp2          | 146           | 52              | 286              | 1536           | 67             | 21               | 183               | 1067            |
| 11571           | Crisp1         | 4             | 2               | 22               | 34             | 5              | 3                | 22                | 49              |
| 11572           | Crisp3         | 4             | 2               | 37               | 21             | 5              | 6                | 35                | 129             |
| 11576           | Afp            | 16            | 480             | 119              | 757            | 9              | 134              | 45                | 177             |
| 11593           | Aga            | 28            | 66              | 24               | 2624           | 27             | 81               | 20                | 2625            |
| 11596           | Ager           | 50            | 26              | 203              | 217            | 31             | 10               | 77                | 106             |
| 11604           | Agrp           | 12            | 9               | 33               | 40             | 11             | 13               | 33                | 33              |
| 11605           | Gla            | 27            | 16              | 62               | 181            | 35             | 15               | 55                | 227             |
| 11606           | Agt            | 16            | 4               | 24               | 47             | 13             | 6                | 27                | 46              |
| 11608           | Agtr1b         | 10            | 3               | 19               | 45             | 9              | 5                | 17                | 41              |
| 11609           | Agtr2          | 5             | 3               | 29               | 15             | 6              | 3                | 32                | 73              |
| 11610           | Agtrap         | 39            | 1291            | 306              | 107            | 28             | 1075             | 153               | 41              |
| 11611           | Agxt           | 6             | 6               | 26               | 95             | 6              | 9                | 29                | 109             |
| 11614           | Nr0b1          | 5             | 3               | 23               | 26             | 5              | 3                | 26                | 25              |
| 11622           | Ahr            | 22            | 22              | 35               | 427            | 38             | 60               | 31                | 1585            |
| 11624           | Ahrr           | 5             | 3               | 31               | 17             | 5              | 3                | 33                | 21              |
| 11625           | Ahsg           | 6             | 9               | 36               | 37             | 5              | 6                | 38                | 30              |
| 11628           | Aicda          | 5             | 19              | 39               | 52             | 6              | 31               | 52                | 432             |
| 11629           | Aif1           | 5             | 8               | 31               | 25             | 6              | 39               | 35                | 52              |
| 11632           | Aip            | 115           | 176             | 2607             | 859            | 103            | 175              | 2178              | 761             |
| 11634           | Aire           | 15            | 12              | 28               | 141            | 14             | 27               | 29                | 31              |
| 11636           | Ak1            | 10            | 21              | 28               | 30             | 8              | 18               | 28                | 36              |
| 11637           | Ak2            | 113           | 359             | 181              | 12229          | 150            | 554              | 198               | 13311           |
| 11640           | Akap1          | 9             | 15              | 33               | 93             | 8              | 11               | 30                | 45              |
| 11641           | Akap2          | 7             | 120             | 27               | 51             | 9              | 252              | 32                | 147             |
| 11642           | Akap3          | 4             | 9               | 29               | 63             | 5              | 4                | 25                | 81              |
| 11643           | Akap4          | 4             | 4               | 27               | 50             | 4              | 2                | 31                | 64              |
| 11647           | Akp2           | 15            | 5               | 39               | 47             | 19             | 62               | 47                | 58              |
| 11648           | Akp3           | 12            | 4               | 42               | 37             | 12             | 3                | 40                | 29              |
| 11650           | Akp5           | 13            | 35              | 22               | 28             | 12             | 28               | 22                | 26              |
| 11651           | Akt1           | 138           | 1239            | 24               | 694            | 142            | 1073             | 27                | 722             |
| 11652           | Akt2           | 315           | 494             | 1125             | 1927           | 247            | 353              | 792               | 1148            |
| 11655           | Alas1          | 37            | 320             | 873              | 1295           | 37             | 388              | 894               | 1293            |
| 11656           | Alas2          | 9             | 10              | 31               | 70             | 9              | 10               | 37                | 63              |
| 11658           | Alcam          | 13            | 3               | 32               | 86             | 49             | 28               | 129               | 462             |
| 11666           | Abcd1          | 66            | 33              | 212              | 264            | 111            | 54               | 329               | 298             |
| 11668           | Aldh1a1        | 8             | 31              | 30               | 22             | 8              | 25               | 29                | 19              |
| 11669           | Aldh2          | 23            | 30              | 382              | 524            | 160            | 459              | 2747              | 2977            |
| 11670           | Aldh3a1        | 9             | 2               | 27               | 92             | 8              | 3                | 21                | 126             |
| 11671           | Aldh3a2        | 75            | 215             | 621              | 529            | 90             | 229              | 829               | 568             |
| 11674           | Aldoa          | 430           | 9811            | 1506             | 11175          | 486            | 12588            | 1554              | 11478           |
| 11676           | Aldoc          | 9             | 43              | 54               | 410            | 13             | 70               | 70                | 702             |
| 11677           | Akr1b3         | 369           | 3351            | 1363             | 7826           | 330            | 2977             | 1131              | 6082            |
| 11682           | Alk            | 9             | 2               | 29               | 50             | 11             | 3                | 26                | 36              |
| 11684           | Alox12         | 6             | 4               | 42               | 78             | 5              | 4                | 36                | 95              |
| 11685           | Alox12e        | 7             | 12              | 24               | 39             | 7              | 17               | 20                | 43              |
| 11686           | Alox12b        | 6             | 90              | 30               | 67             | 6              | 72               | 28                | 64              |
| 11687           | Alox15         | 8             | 4               | 22               | 36             | 7              | 4                | 24                | 35              |
| 11690           | Alox5ap        | 7             | 31              | 40               | 190            | 9              | 59               | 72                | 635             |
| 11692           | Gfer           | 27            | 199             | 631              | 2670           | 22             | 193              | 504               | 3240            |
| 11694           | Alx3           | 11            | 66              | 40               | 79             | 11             | 57               | 38                | 118             |

| NCBI<br>Gene ID | Gene<br>Symbol | Affy.<br>CD4+ | Agilent<br>CD4+ | Illumina<br>CD4+ | Nimbl.<br>CD4+ | Affy.<br>CD19+ | Agilent<br>CD19+ | Illumina<br>CD19+ | Nimbl.<br>CD19+ |
|-----------------|----------------|---------------|-----------------|------------------|----------------|----------------|------------------|-------------------|-----------------|
| 11695           | Alx4           | 11            | 55              | 25               | 37             | 12             | 35               | 25                | 46              |
| 11698           | Ambn           | 6             | 3               | 20               | 17             | 6              | 3                | 20                | 24              |
| 11702           | Amd1           | 137           | 805             | 46               | 4902           | 131            | 683              | 41                | 3848            |
| 11703           | Amd2           | 126           | 241             | 90               | 678            | 122            | 237              | 85                | 426             |
| 11704           | Amelx          | 5             | 82              | 24               | 25             | 5              | 72               | 21                | 48              |
| 11705           | Amh            | 13            | 11              | 29               | 46             | 10             | 9                | 23                | 39              |
| 11717           | Ampd3          | 64            | 20              | 406              | 57             | 67             | 15               | 360               | 31              |
| 11720           | Mat1a          | 6             | 7               | 29               | 20             | 6              | 6                | 27                | 28              |
| 11722           | Amy1           | 5             | 54              | 27               | 83             | 5              | 39               | 25                | 70              |
| 11731           | Ang2           | 6             | 3               | 18               | 27             | 6              | 3                | 21                | 34              |
| 11732           | Ank            | 49            | 90              | 207              | 3117           | 37             | 70               | 135               | 2382            |
| 11733           | Ank1           | 9             | 14              | 58               | 44             | 10             | 12               | 54                | 48              |
| 11735           | Ank3           | 6             | 7               | 38               | 208            | 6              | 7                | 36                | 201             |
| 11736           | Ankfy1         | 130           | 432             | 468              | 612            | 182            | 544              | 711               | 919             |
| 11737           | Anp32a         | 457           | 401             | 1292             | 4592           | 357            | 290              | 981               | 3170            |
| 11739           | Slc25a4        | 97            | 1392            | 87               | 6110           | 136            | 2059             | 108               | 6841            |
| 11740           | Slc25a5        | 436           | 6378            | 5777             | 12931          | 443            | 6739             | 5642              | 11569           |
| 11744           | Anxa11         | 131           | 150             | 53               | 25             | 110            | 101              | 46                | 26              |
| 11745           | Anxa3          | 6             | 2               | 24               | 24             | 6              | 3                | 22                | 26              |
| 11746           | Anxa4          | 7             | 71              | 32               | 184            | 18             | 195              | 81                | 1888            |
| 11747           | Anxa5          | 168           | 803             | 1222             | 5898           | 61             | 272              | 405               | 1661            |
| 11749           | Anxa6          | 665           | 675             | 1325             | 8119           | 373            | 374              | 677               | 3778            |
| 11750           | Anxa7          | 28            | 90              | 137              | 3789           | 39             | 136              | 196               | 4766            |
| 11752           | Anxa8          | 7             | 8               | 28               | 39             | 7              | 10               | 27                | 33              |
| 11754           | Aoc3           | 6             | 3               | 28               | 28             | 6              | 4                | 27                | 30              |
| 11757           | Prdx3          | 129           | 549             | 441              | 4723           | 124            | 549              | 421               | 4040            |
| 11758           | Prdx6          | 219           | 1454            | 290              | 5173           | 81             | 493              | 129               | 1621            |
| 11761           | Aox1           | 6             | 3               | 29               | 32             | 6              | 3                | 28                | 39              |
| 11764           | Ap1b1          | 214           | 771             | 1260             | 409            | 150            | 485              | 919               | 282             |
| 11765           | Ap1g1          | 179           | 128             | 71               | 1970           | 194            | 165              | 69                | 2392            |
| 11766           | Ap1g2          | 124           | 340             | 107              | 1193           | 141            | 275              | 92                | 1019            |
| 11767           | Ap1m1          | 199           | 1260            | 258              | 3514           | 312            | 1731             | 299               | 3906            |
| 11768           | Ap1m2          | 10            | 25              | 52               | 574            | 14             | 21               | 59                | 834             |
| 11769           | Ap1s1          | 51            | 1809            | 119              | 465            | 43             | 1417             | 69                | 203             |
| 11770           | Fabp4          | 4             | 11              | 26               | 110            | 4              | 8                | 31                | 174             |
| 11771           | Ap2a1          | 116           | 369             | 90               | 199            | 113            | 91               | 67                | 174             |
| 11772           | Ap2a2          | 100           | 127             | 223              | 3662           | 57             | 74               | 124               | 2430            |
| 11773           | Ap2m1          | 293           | 692             | 519              | 894            | 308            | 677              | 529               | 810             |
| 11774           | Ap3b1          | 169           | 2222            | 227              | 1622           | 199            | 2004             | 234               | 1385            |
| 11775           | Ap3b2          | 12            | 9               | 30               | 69             | 13             | 8                | 30                | 79              |
| 11776           | Ap3d1          | 291           | 827             | 980              | 2016           | 289            | 775              | 858               | 1832            |
| 11777           | Ap3s1          | 217           | 375             | 516              | 910            | 102            | 124              | 208               | 311             |
| 11778           | Ap3s2          | 22            | 27              | 378              | 621            | 24             | 21               | 359               | 686             |
| 11781           | Ap4m1          | 21            | 36              | 74               | 263            | 25             | 57               | 88                | 290             |
| 11782           | Ap4s1          | 71            | 1091            | 700              | 368            | 71             | 1368             | 737               | 427             |
| 11783           | Apaf1          | 63            | 107             | 43               | 548            | 74             | 107              | 45                | 505             |
| 11784           | Apba2          | 8             | 17              | 26               | 36             | 8              | 19               | 25                | 49              |
| 11785           | Apbb1          | 17            | 6               | 27               | 104            | 16             | 3                | 32                | 101             |
| 11787           | Apbb2          | 16            | 59              | 33               | 456            | 11             | 22               | 31                | 234             |
| 11789           | Apc            | 124           | 189             | 56               | 91             | 135            | 120              | 67                | 71              |
| 11792           | Apex1          | 127           | 380             | 400              | 5533           | 151            | 483              | 515               | 6032            |

| NCBI<br>Gene ID | Gene<br>Symbol | Affy.<br>CD4+ | Agilent<br>CD4+ | Illumina<br>CD4+ | Nimbl.<br>CD4+ | Affy.<br>CD19+ | Agilent<br>CD19+ | Illumina<br>CD19+ | Nimbl.<br>CD19+ |
|-----------------|----------------|---------------|-----------------|------------------|----------------|----------------|------------------|-------------------|-----------------|
| 11796           | Birc3          | 127           | 830             | 120              | 5224           | 361            | 2265             | 284               | 10203           |
| 11797           | Birc2          | 79            | 541             | 215              | 1619           | 85             | 486              | 202               | 1096            |
| 11798           | Birc4          | 94            | 30              | 39               | 37             | 116            | 30               | 43                | 63              |
| 11799           | Birc5          | 7             | 113             | 60               | 168            | 7              | 284              | 101               | 281             |
| 11800           | Api5           | 180           | 506             | 37               | 375            | 162            | 448              | 35                | 294             |
| 11801           | Cd5l           | 5             | 3               | 28               | 70             | 5              | 49               | 29                | 143             |
| 11803           | Aplp1          | 14            | 16              | 32               | 65             | 13             | 6                | 25                | 71              |
| 11804           | Aplp2          | 138           | 725             | 854              | 3538           | 97             | 435              | 604               | 1622            |
| 11806           | Apoa1          | 24            | 8               | 62               | 82             | 22             | 7                | 58                | 88              |
| 11807           | Apoa2          | 21            | 3               | 27               | 98             | 19             | 3                | 26                | 683             |
| 11808           | Apoa4          | 10            | 6               | 44               | 51             | 10             | 7                | 45                | 111             |
| 11810           | Apobec1        | 20            | 94              | 96               | 186            | 89             | 577              | 447               | 1053            |
| 11811           | Apobec2        | 12            | 20              | 33               | 65             | 9              | 6                | 31                | 64              |
| 11812           | Apoc1          | 6             | 37              | 25               | 320            | 6              | 58               | 31                | 231             |
| 11813           | Apoc2          | 6             | 30              | 47               | 71             | 8              | 36               | 41                | 116             |
| 11814           | Apoc3          | 9             | 3               | 21               | 33             | 10             | 3                | 23                | 37              |
| 11815           | Apod           | 5             | 5               | 27               | 50             | 5              | 3                | 25                | 57              |
| 11816           | Apoe           | 67            | 215             | 41               | 393            | 337            | 4237             | 263               | 8402            |
| 11818           | Apoh           | 5             | 8               | 20               | 21             | 5              | 4                | 21                | 21              |
| 11819           | Nr2f2          | 6             | 13              | 41               | 54             | 7              | 11               | 42                | 92              |
| 11820           | App            | 42            | 31              | 76               | 2466           | 13             | 5                | 27                | 261             |
| 11821           | Aprt           | 58            | 2658            | 2064             | 1346           | 54             | 1989             | 1544              | 1197            |
| 11826           | Aqp1           | 12            | 2               | 34               | 34             | 12             | 3                | 31                | 69              |
| 11827           | Aqp2           | 20            | 77              | 36               | 47             | 20             | 91               | 35                | 27              |
| 11828           | Aqp3           | 15            | 331             | 36               | 137            | 11             | 40               | 34                | 52              |
| 11829           | Aqp4           | 5             | 7               | 41               | 20             | 5              | 6                | 42                | 20              |
| 11830           | Aqp5           | 24            | 3               | 20               | 81             | 19             | 3                | 22                | 117             |
| 11831           | Aqp6           | 6             | 7               | 41               | 51             | 6              | 13               | 39                | 66              |
| 11833           | Aqp8           | 7             | 34              | 29               | 33             | 7              | 36               | 31                | 24              |
| 11834           | Aqr            | 317           | 801             | 444              | 939            | 231            | 516              | 252               | 487             |
| 11835           | Ar             | 13            | 8               | 45               | 30             | 5              | 6                | 33                | 41              |
| 11836           | Araf           | 143           | 1853            | 134              | 4564           | 140            | 1397             | 182               | 3676            |
| 11837           | Arbp           | 3193          | 144869          | 295              | 44284          | 2411           | 137078           | 254               | 42299           |
| 11838           | Arc            | 34            | 165             | 81               | 140            | 23             | 44               | 45                | 57              |
| 11839           | Areg           | 12            | 3               | 29               | 24             | 12             | 3                | 26                | 30              |
| 11840           | Arf1           | 824           | 1095            | 2273             | 16172          | 887            | 1030             | 2281              | 15551           |
| 11841           | Arf2           | 31            | 18              | 336              | 1478           | 39             | 13               | 341               | 1472            |
| 11842           | Arf3           | 395           | 3642            | 336              | 4029           | 264            | 2078             | 216               | 1870            |
| 11843           | Arf4           | 198           | 426             | 56               | 3036           | 217            | 526              | 52                | 2897            |
| 11844           | Arf5           | 244           | 252             | 300              | 305            | 171            | 246              | 138               | 160             |
| 11845           | Arf6           | 712           | 3396            | 980              | 5165           | 958            | 5370             | 1271              | 4928            |
| 11846           | Arg1           | 9             | 5               | 19               | 94             | 7              | 4                | 22                | 59              |
| 11847           | Arg2           | 7             | 2               | 26               | 41             | 7              | 2                | 31                | 43              |
| 11848           | Rhoa           | 805           | 1356            | 1476             | 25318          | 968            | 1489             | 1758              | 21746           |
| 11852           | Rhob           | 11            | 10              | 133              | 326            | 28             | 20               | 277               | 998             |
| 11853           | Rhoc           | 16            | 56              | 28               | 53             | 14             | 13               | 23                | 109             |
| 11854           | Rhod           | 7             | 17              | 32               | 62             | 7              | 14               | 29                | 58              |
| 11855           | Arhgap5        | 16            | 28              | 23               | 133            | 6              | 3                | 30                | 51              |
| 11856           | Arhgap6        | 6             | 5               | 33               | 67             | 8              | 67               | 34                | 611             |
| 11857           | Arhgdib        | 1048          | 8112            | 165              | 11755          | 1074           | 8006             | 151               | 11146           |
| 11859           | Phox2a         | 9             | 24              | 29               | 43             | 9              | 21               | 29                | 55              |

| NCBI<br>Gene ID | Gene<br>Symbol | Affy.<br>CD4+ | Agilent<br>CD4+ | Illumina<br>CD4+ | Nimbl.<br>CD4+ | Affy.<br>CD19+ | Agilent<br>CD19+ | Illumina<br>CD19+ | Nimbl.<br>CD19+ |
|-----------------|----------------|---------------|-----------------|------------------|----------------|----------------|------------------|-------------------|-----------------|
| 11863           | Arnt           | 142           | 335             | 237              | 573            | 138            | 311              | 231               | 463             |
| 11864           | Arnt2          | 11            | 2               | 15               | 31             | 12             | 3                | 16                | 40              |
| 11865           | Arntl          | 53            | 144             | 243              | 1083           | 61             | 169              | 300               | 1181            |
| 11867           | Arpc1b         | 652           | 7851            | 1545             | 18227          | 758            | 10492            | 1405              | 16974           |
| 11870           | Art1           | 12            | 2               | 42               | 71             | 12             | 3                | 37                | 67              |
| 11871           | Art2a          | 6             | 4               | 31               | 42             | 5              | 8                | 33                | 26              |
| 11872           | Art2b          | 144           | 21              | 94               | 1458           | 5              | 2                | 25                | 34              |
| 11875           | Art5           | 14            | 54              | 27               | 60             | 12             | 42               | 26                | 68              |
| 11876           | Artn           | 9             | 15              | 23               | 66             | 7              | 9                | 26                | 104             |
| 11877           | Arvcf          | 19            | 22              | 30               | 184            | 19             | 33               | 32                | 208             |
| 11878           | Arx            | 12            | 107             | 18               | 48             | 12             | 89               | 22                | 47              |
| 11881           | Arsb           | 47            | 7               | 40               | 66             | 28             | 7                | 35                | 47              |
| 11883           | Arsa           | 20            | 433             | 350              | 214            | 18             | 346              | 339               | 161             |
| 11886           | Asah1          | 36            | 62              | 522              | 1930           | 65             | 139              | 899               | 3364            |
| 11889           | Asgr1          | 7             | 81              | 20               | 74             | 6              | 87               | 21                | 75              |
| 11890           | Asgr2          | 7             | 44              | 26               | 28             | 7              | 31               | 25                | 28              |
| 11891           | Rab27a         | 269           | 319             | 1123             | 12873          | 77             | 73               | 257               | 3595            |
| 11899           | Astn1          | 7             | 16              | 21               | 34             | 7              | 19               | 26                | 27              |
| 11905           | Serpinc1       | 11            | 32              | 23               | 80             | 8              | 20               | 22                | 43              |
| 11907           | Ate1           | 130           | 180             | 531              | 308            | 129            | 172              | 517               | 293             |
| 11908           | Atf1           | 88            | 792             | 26               | 12637          | 75             | 589              | 26                | 10475           |
| 11909           | Atf2           | 139           | 136             | 64               | 3056           | 135            | 87               | 72                | 2573            |
| 11910           | Atf3           | 15            | 6               | 19               | 36             | 17             | 10               | 19                | 64              |
| 11911           | Atf4           | 106           | 340             | 1775             | 11601          | 141            | 402              | 2201              | 11607           |
| 11920           | Atm            | 174           | 156             | 206              | 113            | 173            | 125              | 183               | 79              |
| 11921           | Atoh1          | 9             | 7               | 26               | 34             | 8              | 7                | 31                | 37              |
| 11922           | Neurod6        | 4             | 4               | 27               | 22             | 4              | 3                | 23                | 26              |
| 11923           | Neurod4        | 4             | 2               | 25               | 29             | 5              | 3                | 24                | 80              |
| 11924           | Neurog2        | 5             | 21              | 31               | 64             | 6              | 16               | 32                | 60              |
| 11925           | Neurog3        | 7             | 25              | 21               | 30             | 7              | 29               | 19                | 21              |
| 11927           | Atox1          | 57            | 1318            | 757              | 1521           | 49             | 1037             | 654               | 2177            |
| 11928           | Atp1a1         | 473           | 5150            | 4709             | 1355           | 227            | 2356             | 2078              | 421             |
| 11931           | Atp1b1         | 188           | 443             | 2922             | 5139           | 43             | 116              | 917               | 1286            |
| 11932           | Atp1b2         | 9             | 77              | 36               | 44             | 9              | 72               | 32                | 39              |
| 11933           | Atp1b3         | 1249          | 6982            | 9226             | 27290          | 235            | 712              | 1721              | 6147            |
| 11936           | Fxyd2          | 7             | 2               | 36               | 153            | 6              | 3                | 34                | 148             |
| 11937           | Atp2a1         | 12            | 22              | 34               | 132            | 12             | 25               | 32                | 231             |
| 11938           | Atp2a2         | 232           | 113             | 397              | 2420           | 232            | 67               | 348               | 2272            |
| 11941           | Atp2b2         | 11            | 18              | 132              | 58             | 11             | 19               | 132               | 75              |
| 11944           | Atp4a          | 10            | 19              | 33               | 30             | 11             | 17               | 29                | 42              |
| 11945           | Atp4b          | 9             | 28              | 29               | 45             | 9              | 18               | 28                | 40              |
| 11946           | Atp5a1         | 763           | 5332            | 583              | 18080          | 783            | 5426             | 545               | 16494           |
| 11947           | Atp5b          | 710           | 9815            | 9272             | 19671          | 720            | 8667             | 7933              | 16677           |
| 11949           | Atp5c1         | 700           | 8109            | 3175             | 14868          | 684            | 6776             | 2965              | 11754           |
| 11950           | Atp5f1         | 298           | 2935            | 776              | 13366          | 285            | 2704             | 777               | 14115           |
| 11951           | Atp5g1         | 68            | 1000            | 1470             | 1044           | 66             | 1045             | 1436              | 1282            |
| 11966           | Atp6v1b2       | 181           | 93              | 994              | 1565           | 235            | 113              | 1292              | 1642            |
| 11972           | Atp6v0d1       | 88            | 360             | 873              | 931            | 126            | 380              | 1145              | 1056            |
| 11973           | Atp6v1e1       | 126           | 227             | 2154             | 6532           | 116            | 213              | 2042              | 6210            |
| 11974           | Atp6v0e        | 220           | 2972            | 1737             | 18587          | 264            | 3444             | 1722              | 18612           |
| 11975           | Atp6v0a1       | 12            | 44              | 56               | 57             | 206            | 143              | 686               | 1536            |

| NCBI<br>Gene ID | Gene<br>Symbol | Affy.<br>CD4+ | Agilent<br>CD4+ | Illumina<br>CD4+ | Nimbl.<br>CD4+ | Affy.<br>CD19+ | Agilent<br>CD19+ | Illumina<br>CD19+ | Nimbl.<br>CD19+ |
|-----------------|----------------|---------------|-----------------|------------------|----------------|----------------|------------------|-------------------|-----------------|
| 11977           | Atp7a          | 42            | 387             | 113              | 623            | 38             | 339              | 98                | 750             |
| 11979           | Atp7b          | 7             | 234             | 28               | 67             | 7              | 275              | 26                | 79              |
| 11980           | Atp8a1         | 187           | 258             | 144              | 3595           | 284            | 399              | 207               | 4831            |
| 11981           | Atp9a          | 15            | 46              | 46               | 643            | 8              | 14               | 26                | 72              |
| 11982           | Atp10a         | 124           | 75              | 233              | 375            | 15             | 8                | 35                | 49              |
| 11983           | Atpif1         | 49            | 1041            | 986              | 4830           | 68             | 2210             | 1782              | 8568            |
| 11984           | Atp6v0c        | 186           | 139             | 59               | 9436           | 200            | 155              | 63                | 10946           |
| 11987           | Slc7a1         | 106           | 40              | 35               | 210            | 105            | 38               | 34                | 197             |
| 11988           | Slc7a2         | 6             | 5               | 34               | 24             | 6              | 4                | 33                | 23              |
| 11989           | Slc7a3         | 8             | 16              | 48               | 50             | 8              | 4                | 34                | 23              |
| 11990           | Atrn           | 116           | 234             | 41               | 2130           | 80             | 145              | 40                | 1129            |
| 11991           | Hnrpd          | 446           | 1868            | 21               | 5881           | 468            | 1516             | 23                | 3982            |
| 11992           | Auh            | 81            | 708             | 79               | 3827           | 52             | 471              | 68                | 2531            |
| 11993           | Aup1           | 295           | 448             | 1585             | 3856           | 310            | 460              | 1417              | 3324            |
| 11994           | Pcdh15         | 7             | 4               | 35               | 32             | 7              | 13               | 31                | 31              |
| 11997           | Akr1b7         | 6             | 4               | 33               | 36             | 8              | 7                | 34                | 49              |
| 11998           | Avp            | 18            | 3               | 29               | 52             | 18             | 4                | 30                | 74              |
| 12000           | Avpr2          | 34            | 3               | 54               | 572            | 33             | 5                | 53                | 816             |
| 12006           | Axin2          | 42            | 34              | 204              | 38             | 10             | 3                | 33                | 24              |
| 12007           | Azgp1          | 7             | 37              | 34               | 37             | 7              | 41               | 33                | 32              |
| 12009           | Azi1           | 18            | 156             | 61               | 229            | 17             | 266              | 70                | 353             |
| 12010           | B2m            | 2598          | 10825           | 17055            | 39905          | 2428           | 7071             | 13847             | 38197           |
| 12012           | Baat           | 5             | 2               | 23               | 25             | 4              | 3                | 23                | 31              |
| 12013           | Bach1          | 64            | 68              | 105              | 1436           | 48             | 14               | 94                | 1095            |
| 12014           | Bach2          | 276           | 1229            | 886              | 2270           | 340            | 1253             | 908               | 2653            |
| 12015           | Bad            | 20            | 13              | 125              | 420            | 21             | 13               | 142               | 572             |
| 12017           | Bag1           | 100           | 360             | 2979             | 1976           | 77             | 318              | 2510              | 1503            |
| 12018           | Bak1           | 38            | 148             | 57               | 83             | 40             | 225              | 51                | 151             |
| 12021           | Bard1          | 10            | 3               | 26               | 38             | 11             | 3                | 29                | 37              |
| 12022           | Barx1          | 17            | 2               | 29               | 68             | 16             | 3                | 33                | 63              |
| 12023           | Barx2          | 13            | 3               | 31               | 56             | 11             | 223              | 27                | 77              |
| 12028           | Bax            | 63            | 205             | 64               | 2154           | 62             | 299              | 56                | 1318            |
| 12029           | Bcl6b          | 8             | 3               | 25               | 27             | 10             | 8                | 26                | 49              |
| 12032           | Bcan           | 10            | 4               | 35               | 26             | 9              | 4                | 35                | 25              |
| 12033           | Bcap29         | 70            | 404             | 268              | 7558           | 63             | 386              | 266               | 7251            |
| 12035           | Bcat1          | 10            | 6               | 27               | 134            | 10             | 6                | 36                | 109             |
| 12036           | Bcat2          | 71            | 68              | 241              | 653            | 44             | 42               | 115               | 387             |
| 12038           | Bche           | 4             | 5               | 18               | 18             | 5              | 5                | 20                | 23              |
| 12039           | Bckdha         | 39            | 307             | 249              | 1112           | 63             | 658              | 364               | 1880            |
| 12040           | Bckdhb         | 39            | 132             | 297              | 1762           | 39             | 122              | 300               | 1562            |
| 12041           | Bckdk          | 52            | 232             | 146              | 806            | 70             | 273              | 179               | 969             |
| 12042           | Bcl10          | 43            | 872             | 582              | 7357           | 86             | 1657             | 1040              | 10508           |
| 12043           | Bcl2           | 250           | 1698            | 1810             | 7708           | 197            | 2078             | 1539              | 4905            |
| 12044           | Bcl2a1c        | 31            | 25              | 27               | 236            | 91             | 121              | 26                | 692             |
| 12048           | Bcl2l1         | 30            | 54              | 28               | 118            | 17             | 21               | 26                | 78              |
| 12049           | Bcl2l10        | 5             | 3               | 25               | 97             | 4              | 3                | 20                | 119             |
| 12050           | Bcl2l2         | 10            | 21              | 67               | 145            | 11             | 62               | 153               | 302             |
| 12051           | Bcl3           | 100           | 1723            | 137              | 279            | 122            | 2752             | 189               | 353             |
| 12053           | Bcl6           | 53            | 809             | 523              | 316            | 217            | 3298             | 1802              | 674             |
| 12054           | Bcl7b          | 150           | 90              | 54               | 1712           | 144            | 89               | 51                | 1437            |
| 12055           | Bcl7c          | 48            | 378             | 345              | 326            | 75             | 794              | 503               | 559             |

| NCBI<br>Gene ID | Gene<br>Symbol | Affy.<br>CD4+ | Agilent<br>CD4+ | Illumina<br>CD4+ | Nimbl.<br>CD4+ | Affy.<br>CD19+ | Agilent<br>CD19+ | Illumina<br>CD19+ | Nimbl.<br>CD19+ |
|-----------------|----------------|---------------|-----------------|------------------|----------------|----------------|------------------|-------------------|-----------------|
| 12057           | Opn1sw         | 6             | 2               | 32               | 512            | 6              | 3                | 35                | 360             |
| 12061           | Bdkrb1         | 10            | 87              | 33               | 47             | 10             | 104              | 29                | 29              |
| 12062           | Bdkrb2         | 10            | 22              | 28               | 56             | 10             | 21               | 25                | 88              |
| 12064           | Bdnf           | 7             | 5               | 29               | 24             | 7              | 3                | 28                | 24              |
| 12068           | Bet1           | 17            | 144             | 21               | 585            | 19             | 169              | 24                | 678             |
| 12069           | Bex2           | 5             | 16              | 31               | 80             | 5              | 8                | 25                | 47              |
| 12070           | Ngfrap1        | 61            | 992             | 492              | 10267          | 35             | 492              | 158               | 3879            |
| 12075           | Bfsp1          | 9             | 2               | 31               | 27             | 8              | 3                | 26                | 31              |
| 12091           | Glb1           | 70            | 224             | 452              | 1640           | 69             | 229              | 472               | 1647            |
| 12096           | Bglap1         | 44            | 3               | 21               | 46             | 42             | 3                | 25                | 70              |
| 12111           | Bgn            | 9             | 21              | 31               | 26             | 9              | 22               | 30                | 41              |
| 12116           | Bhmt           | 9             | 11              | 25               | 61             | 9              | 18               | 31                | 59              |
| 12121           | Bicd1          | 6             | 2               | 30               | 28             | 7              | 3                | 34                | 25              |
| 12122           | Bid            | 26            | 128             | 134              | 167            | 61             | 514              | 426               | 651             |
| 12125           | Bcl2l11        | 93            | 704             | 79               | 5457           | 69             | 436              | 57                | 3479            |
| 12140           | Fabp7          | 5             | 3               | 18               | 50             | 5              | 3                | 19                | 56              |
| 12142           | Prdm1          | 11            | 36              | 26               | 329            | 10             | 17               | 25                | 114             |
| 12143           | Blk            | 10            | 7               | 26               | 34             | 865            | 454              | 1952              | 9722            |
| 12144           | Blm            | 23            | 150             | 176              | 217            | 24             | 222              | 222               | 215             |
| 12145           | Blr1           | 12            | 116             | 46               | 137            | 433            | 7400             | 1123              | 4464            |
| 12151           | Bmi1           | 125           | 193             | 192              | 3993           | 176            | 195              | 274               | 5049            |
| 12153           | Bmp1           | 12            | 42              | 43               | 28             | 13             | 2275             | 39                | 23              |
| 12154           | Bmp10          | 5             | 8               | 29               | 28             | 5              | 5                | 30                | 28              |
| 12155           | Bmp15          | 6             | 2               | 39               | 19             | 6              | 3                | 34                | 21              |
| 12156           | Bmp2           | 5             | 3               | 21               | 32             | 5              | 3                | 21                | 40              |
| 12159           | Bmp4           | 8             | 18              | 26               | 42             | 8              | 17               | 27                | 66              |
| 12160           | Bmp5           | 5             | 11              | 28               | 52             | 5              | 4                | 23                | 57              |
| 12161           | Bmp6           | 11            | 9               | 20               | 36             | 12             | 6                | 20                | 33              |
| 12162           | Bmp7           | 15            | 63              | 40               | 48             | 12             | 3                | 30                | 29              |
| 12163           | Bmp8a          | 15            | 3               | 28               | 45             | 16             | 6                | 30                | 57              |
| 12164           | Bmp8b          | 13            | 2               | 27               | 21             | 11             | 3                | 26                | 26              |
| 12165           | Gdf2           | 6             | 2               | 16               | 56             | 6              | 3                | 21                | 79              |
| 12166           | Bmpr1a         | 4             | 3               | 35               | 19             | 4              | 3                | 33                | 24              |
| 12167           | Bmpr1b         | 4             | 2               | 24               | 42             | 5              | 3                | 28                | 55              |
| 12168           | Bmpr2          | 33            | 37              | 42               | 34             | 16             | 10               | 37                | 18              |
| 12173           | Bnc1           | 5             | 2               | 19               | 54             | 5              | 3                | 18                | 94              |
| 12175           | Bnip2          | 181           | 141             | 293              | 7620           | 199            | 134              | 264               | 8496            |
| 12176           | Bnip3          | 10            | 53              | 24               | 156            | 10             | 95               | 25                | 240             |
| 12177           | Bnip3l         | 331           | 883             | 1254             | 12920          | 241            | 781              | 884               | 8576            |
| 12180           | Smyd1          | 6             | 128             | 47               | 297            | 6              | 94               | 44                | 316             |
| 12181           | Bop1           | 114           | 967             | 669              | 1209           | 107            | 971              | 652               | 1589            |
| 12182           | Bst1           | 5             | 2               | 24               | 26             | 6              | 12               | 29                | 145             |
| 12183           | Bpgm           | 33            | 211             | 39               | 1789           | 24             | 160              | 32                | 1073            |
| 12189           | Brca1          | 10            | 15              | 44               | 50             | 13             | 51               | 40                | 82              |
| 12190           | Brca2          | 10            | 22              | 39               | 223            | 11             | 56               | 47                | 236             |
| 12192           | Zfp36l1        | 249           | 2259            | 3030             | 33733          | 433            | 3698             | 4655              | 34915           |
| 12193           | Zfp36l2        | 732           | 37              | 31               | 3702           | 365            | 22               | 28                | 1832            |
| 12209           | Brs3           | 7             | 2               | 30               | 33             | 8              | 3                | 32                | 42              |
| 12211           | Birc6          | 632           | 762             | 140              | 351            | 442            | 610              | 118               | 106             |
| 12212           | Chic1          | 5             | 49              | 39               | 23             | 5              | 42               | 38                | 21              |
| 12215           | Bsg            | 97            | 79              | 293              | 412            | 114            | 99               | 256               | 442             |



| NCBI<br>Gene ID | Gene<br>Symbol | Affy.<br>CD4+ | Agilent<br>CD4+ | Illumina<br>CD4+ | Nimbl.<br>CD4+ | Affy.<br>CD19+ | Agilent<br>CD19+ | Illumina<br>CD19+ | Nimbl.<br>CD19+ |
|-----------------|----------------|---------------|-----------------|------------------|----------------|----------------|------------------|-------------------|-----------------|
| 12217           | Bsn            | 9             | 5               | 30               | 97             | 9              | 4                | 29                | 53              |
| 12223           | Btc            | 10            | 2               | 36               | 23             | 10             | 3                | 27                | 17              |
| 12224           | Klf5           | 13            | 6               | 34               | 33             | 13             | 5                | 35                | 38              |
| 12226           | Btg1           | 1738          | 30046           | 1349             | 40037          | 1766           | 37327            | 1341              | 32281           |
| 12227           | Btg2           | 360           | 1866            | 29               | 8354           | 294            | 1741             | 24                | 4809            |
| 12229           | Btk            | 8             | 4               | 24               | 90             | 247            | 865              | 1361              | 3656            |
| 12231           | Btn1a1         | 6             | 11              | 31               | 50             | 6              | 7                | 33                | 24              |
| 12234           | Btrc           | 68            | 16              | 70               | 90             | 121            | 19               | 106               | 102             |
| 12235           | Bub1           | 5             | 5               | 45               | 37             | 6              | 21               | 44                | 88              |
| 12236           | Bub1b          | 10            | 18              | 57               | 115            | 14             | 59               | 115               | 156             |
| 12237           | Bub3           | 215           | 1247            | 126              | 13191          | 206            | 1092             | 132               | 9855            |
| 12238           | Commd3         | 72            | 855             | 608              | 1373           | 87             | 908              | 660               | 1299            |
| 12258           | Serping1       | 5             | 3               | 19               | 29             | 6              | 3                | 23                | 24              |
| 12259           | C1qa           | 9             | 12              | 31               | 71             | 9              | 31               | 40                | 207             |
| 12260           | C1qb           | 9             | 69              | 29               | 49             | 10             | 59               | 43                | 149             |
| 12261           | C1qbp          | 84            | 2088            | 535              | 2709           | 93             | 2114             | 413               | 2610            |
| 12263           | C2             | 8             | 51              | 32               | 41             | 8              | 56               | 29                | 300             |
| 12266           | C3             | 11            | 50              | 27               | 45             | 12             | 51               | 34                | 40              |
| 12267           | C3ar1          | 7             | 19              | 22               | 228            | 6              | 15               | 25                | 161             |
| 12269           | C4bp           | 6             | 22              | 21               | 25             | 5              | 25               | 22                | 21              |
| 12274           | C6             | 5             | 20              | 28               | 53             | 6              | 27               | 32                | 44              |
| 12279           | C9             | 5             | 4               | 22               | 137            | 5              | 3                | 23                | 185             |
| 12282           | Hyou1          | 107           | 732             | 47               | 98             | 136            | 1130             | 50                | 99              |
| 12283           | Cab39          | 475           | 647             | 23               | 1865           | 352            | 432              | 21                | 991             |
| 12286           | Cacna1a        | 11            | 17              | 31               | 84             | 9              | 21               | 26                | 80              |
| 12287           | Cacna1b        | 9             | 10              | 32               | 80             | 9              | 5                | 31                | 84              |
| 12288           | Cacna1c        | 6             | 26              | 24               | 115            | 6              | 21               | 35                | 82              |
| 12289           | Cacna1d        | 7             | 3               | 32               | 882            | 10             | 8                | 31                | 570             |
| 12290           | Cacna1e        | 10            | 3               | 28               | 21             | 115            | 3                | 28                | 34              |
| 12291           | Cacna1g        | 7             | 5               | 31               | 81             | 6              | 9                | 29                | 118             |
| 12292           | Cacna1s        | 8             | 47              | 31               | 107            | 8              | 198              | 52                | 159             |
| 12293           | Cacna2d1       | 5             | 4               | 37               | 50             | 5              | 7                | 32                | 57              |
| 12294           | Cacna2d3       | 5             | 2               | 31               | 21             | 5              | 4                | 28                | 22              |
| 12295           | Cacnb1         | 57            | 67              | 41               | 216            | 25             | 47               | 35                | 207             |
| 12296           | Cacnb2         | 9             | 23              | 52               | 33             | 9              | 19               | 50                | 31              |
| 12297           | Cacnb3         | 16            | 57              | 37               | 58             | 13             | 23               | 37                | 29              |
| 12298           | Cacnb4         | 7             | 2               | 29               | 77             | 8              | 9                | 32                | 140             |
| 12299           | Cacng1         | 12            | 21              | 38               | 37             | 13             | 11               | 35                | 36              |
| 12300           | Cacng2         | 22            | 30              | 33               | 24             | 22             | 27               | 37                | 29              |
| 12301           | Cacybp         | 301           | 1316            | 296              | 6545           | 311            | 1406             | 287               | 6245            |
| 12305           | Ddr1           | 49            | 513             | 128              | 177            | 17             | 17               | 23                | 104             |
| 12306           | Anxa2          | 9             | 65              | 322              | 653            | 11             | 78               | 357               | 524             |
| 12307           | Calb1          | 5             | 3               | 31               | 29             | 5              | 4                | 30                | 19              |
| 12308           | Calb2          | 5             | 4               | 35               | 65             | 5              | 5                | 33                | 76              |
| 12309           | S100g          | 9             | 2               | 27               | 39             | 9              | 3                | 27                | 33              |
| 12310           | Calca          | 6             | 24              | 28               | 22             | 7              | 18               | 30                | 22              |
| 12311           | Calcr          | 6             | 10              | 24               | 23             | 6              | 11               | 24                | 32              |
| 12313           | Calm1          | 460           | 2198            | 29               | 17532          | 500            | 1854             | 27                | 18018           |
| 12314           | Calm2          | 584           | 3242            | 207              | 14472          | 713            | 3745             | 218               | 14096           |
| 12315           | Calm3          | 204           | 726             | 1853             | 1374           | 239            | 787              | 1709              | 931             |
| 12317           | Calr           | 305           | 1246            | 28               | 249            | 451            | 2141             | 27                | 313             |

| NCBI<br>Gene ID | Gene<br>Symbol | Affy.<br>CD4+ | Agilent<br>CD4+ | Illumina<br>CD4+ | Nimbl.<br>CD4+ | Affy.<br>CD19+ | Agilent<br>CD19+ | Illumina<br>CD19+ | Nimbl.<br>CD19+ |
|-----------------|----------------|---------------|-----------------|------------------|----------------|----------------|------------------|-------------------|-----------------|
| 12321           | Calu           | 102           | 152             | 382              | 3335           | 84             | 88               | 290               | 2452            |
| 12322           | Camk2a         | 7             | 18              | 31               | 56             | 7              | 21               | 31                | 53              |
| 12323           | Camk2b         | 20            | 53              | 140              | 168            | 15             | 23               | 34                | 78              |
| 12325           | Camk2g         | 63            | 498             | 244              | 1014           | 25             | 126              | 78                | 320             |
| 12326           | Camk4          | 181           | 608             | 1195             | 795            | 6              | 20               | 29                | 32              |
| 12328           | Caml           | 51            | 300             | 140              | 1023           | 47             | 317              | 127               | 1105            |
| 12330           | Canx           | 365           | 1868            | 105              | 10102          | 542            | 2957             | 183               | 10558           |
| 12331           | Cap1           | 768           | 150             | 896              | 1222           | 687            | 121              | 796               | 808             |
| 12332           | Capg           | 50            | 473             | 323              | 1792           | 314            | 3726             | 1968              | 10238           |
| 12333           | Capn1          | 185           | 163             | 36               | 421            | 111            | 114              | 31                | 253             |
| 12334           | Capn2          | 86            | 172             | 948              | 1429           | 30             | 46               | 267               | 397             |
| 12336           | Capns1         | 287           | 219             | 601              | 5983           | 275            | 222              | 459               | 3965            |
| 12337           | Capn5          | 15            | 19              | 38               | 42             | 25             | 168              | 310               | 408             |
| 12338           | Capn6          | 6             | 6               | 19               | 24             | 5              | 5                | 18                | 27              |
| 12339           | Capn7          | 127           | 612             | 313              | 2011           | 144            | 541              | 334               | 2213            |
| 12343           | Capza2         | 244           | 689             | 32               | 5704           | 297            | 820              | 29                | 5663            |
| 12344           | Capza3         | 4             | 2               | 36               | 17             | 4              | 3                | 28                | 25              |
| 12345           | Capzb          | 342           | 2618            | 1269             | 12760          | 359            | 2619             | 1089              | 11088           |
| 12346           | Car1           | 7             | 68              | 28               | 28             | 8              | 61               | 29                | 27              |
| 12348           | Car11          | 17            | 51              | 85               | 193            | 15             | 28               | 36                | 93              |
| 12349           | Car2           | 9             | 48              | 40               | 346            | 9              | 50               | 38                | 361             |
| 12350           | Car3           | 6             | 9               | 28               | 21             | 6              | 9                | 26                | 21              |
| 12351           | Car4           | 7             | 3               | 18               | 19             | 6              | 4                | 26                | 23              |
| 12352           | Car5a          | 10            | 10              | 23               | 39             | 10             | 13               | 23                | 41              |
| 12353           | Car6           | 5             | 11              | 24               | 31             | 5              | 5                | 26                | 34              |
| 12354           | Car7           | 8             | 157             | 26               | 109            | 7              | 148              | 27                | 154             |
| 12355           | Nr1i3          | 8             | 2               | 385              | 68             | 8              | 5                | 433               | 55              |
| 12359           | Cat            | 123           | 459             | 33               | 675            | 215            | 637              | 40                | 915             |
| 12361           | Cask           | 19            | 19              | 38               | 72             | 14             | 20               | 35                | 56              |
| 12362           | Casp1          | 7             | 60              | 106              | 108            | 47             | 1041             | 1673              | 1192            |
| 12363           | Casp4          | 9             | 63              | 34               | 146            | 50             | 686              | 291               | 1741            |
| 12364           | Casp12         | 4             | 14              | 26               | 52             | 4              | 12               | 24                | 71              |
| 12366           | Casp2          | 72            | 2106            | 1490             | 6550           | 96             | 2699             | 1857              | 5608            |
| 12367           | Casp3          | 15            | 9               | 74               | 40             | 17             | 7                | 76                | 46              |
| 12368           | Casp6          | 33            | 646             | 534              | 1940           | 34             | 794              | 455               | 1550            |
| 12369           | Casp7          | 21            | 122             | 79               | 2196           | 33             | 297              | 119               | 1781            |
| 12370           | Casp8          | 301           | 1399            | 1479             | 9966           | 195            | 852              | 834               | 5209            |
| 12371           | Casp9          | 39            | 185             | 200              | 932            | 69             | 507              | 426               | 1665            |
| 12372           | Casq1          | 7             | 2               | 34               | 35             | 6              | 3                | 36                | 47              |
| 12373           | Casq2          | 5             | 5               | 24               | 35             | 5              | 4                | 26                | 32              |
| 12380           | Cast           | 273           | 1059            | 568              | 3036           | 136            | 473              | 326               | 1521            |
| 12389           | Cav1           | 6             | 12              | 30               | 26             | 7              | 12               | 26                | 23              |
| 12390           | Cav2           | 5             | 3               | 29               | 38             | 5              | 3                | 31                | 93              |
| 12391           | Cav3           | 6             | 7               | 26               | 32             | 6              | 14               | 26                | 35              |
| 12393           | Runx2          | 14            | 47              | 29               | 116            | 13             | 3                | 28                | 30              |
| 12394           | Runx1          | 198           | 139             | 194              | 1199           | 149            | 123              | 123               | 611             |
| 12398           | Cbfa2t3h       | 13            | 5               | 31               | 69             | 92             | 1701             | 573               | 358             |
| 12399           | Runx3          | 125           | 104             | 29               | 1015           | 130            | 112              | 28                | 1265            |
| 12400           | Cbfb           | 284           | 2947            | 3479             | 4212           | 245            | 1804             | 2920              | 3207            |
| 12401           | Serpina6       | 4             | 6               | 21               | 49             | 4              | 3                | 18                | 35              |
| 12402           | Cbl            | 381           | 52              | 55               | 3204           | 267            | 13               | 40                | 1787            |

| NCBI Gene ID | Gene Symbol | Affy. CD4+ | Agilent CD4+ | Illumina CD4+ | Nimbl. CD4+ | Affy. CD19+ | Agilent CD19+ | Illumina CD19+ | Nimbl. CD19+ |
|--------------|-------------|------------|--------------|---------------|-------------|-------------|---------------|----------------|--------------|
| 12404        | Cbln1       | 6          | 22           | 27            | 37          | 5           | 23            | 23             | 33           |
| 12405        | Cbln2       | 7          | 14           | 20            | 21          | 7           | 11            | 19             | 203          |
| 12406        | Serpinh1    | 7          | 6            | 23            | 42          | 7           | 8             | 28             | 44           |
| 12408        | Cbr1        | 130        | 361          | 672           | 2530        | 42          | 98            | 157            | 758          |
| 12409        | Cbr2        | 7          | 13           | 28            | 38          | 8           | 14            | 30             | 27           |
| 12411        | Cbs         | 18         | 15           | 28            | 27          | 16          | 15            | 29             | 33           |
| 12412        | Cbx1        | 120        | 1006         | 53            | 3792        | 150         | 1340          | 42             | 3204         |
| 12416        | Cbx2        | 25         | 78           | 65            | 98          | 21          | 19            | 35             | 50           |
| 12417        | Cbx3        | 278        | 4831         | 364           | 21249       | 197         | 3943          | 254            | 17020        |
| 12418        | Cbx4        | 239        | 1524         | 23            | 765         | 94          | 519           | 21             | 433          |
| 12419        | Cbx5        | 57         | 110          | 25            | 87          | 71          | 134           | 21             | 144          |
| 12421        | Rb1cc1      | 88         | 342          | 24            | 2500        | 69          | 312           | 29             | 2390         |
| 12424        | Cck         | 7          | 14           | 26            | 52          | 6           | 19            | 31             | 42           |
| 12425        | Cckar       | 7          | 3            | 32            | 32          | 8           | 4             | 29             | 21           |
| 12426        | Cckbr       | 5          | 13           | 22            | 43          | 5           | 14            | 30             | 34           |
| 12427        | Ccna1       | 9          | 8            | 21            | 17          | 8           | 8             | 22             | 21           |
| 12428        | Ccna2       | 9          | 30           | 24            | 313         | 16          | 85            | 20             | 852          |
| 12442        | Ccnb2       | 17         | 121          | 22            | 88          | 18          | 222           | 20             | 165          |
| 12443        | Ccnd1       | 13         | 18           | 36            | 108         | 11          | 25            | 39             | 92           |
| 12444        | Ccnd2       | 1232       | 4802         | 3525          | 16481       | 366         | 1499          | 1059           | 6752         |
| 12445        | Ccnd3       | 263        | 2059         | 72            | 3414        | 107         | 589           | 48             | 1781         |
| 12447        | Ccne1       | 37         | 226          | 52            | 520         | 45          | 353           | 63             | 757          |
| 12448        | Ccne2       | 5          | 4            | 29            | 224         | 6           | 4             | 27             | 291          |
| 12449        | Ccnf        | 9          | 12           | 31            | 188         | 14          | 30            | 25             | 353          |
| 12450        | Ccng1       | 373        | 744          | 1163          | 3595        | 254         | 414           | 937            | 2404         |
| 12452        | Ccng2       | 86         | 809          | 801           | 3953        | 115         | 759           | 1040           | 4279         |
| 12453        | Ccni        | 396        | 2479         | 30            | 5263        | 436         | 2076          | 31             | 4699         |
| 12454        | Ccnk        | 105        | 59           | 17            | 537         | 111         | 144           | 20             | 604          |
| 12455        | Ccnt1       | 99         | 75           | 1426          | 471         | 108         | 71            | 1630           | 451          |
| 12457        | Ccrn4l      | 49         | 216          | 385           | 471         | 27          | 53            | 125            | 135          |
| 12458        | Ccr6        | 8          | 32           | 25            | 42          | 104         | 2172          | 394            | 2203         |
| 12460        | Ccs         | 46         | 2190         | 1951          | 6538        | 19          | 692           | 529            | 2267         |
| 12461        | Cct2        | 712        | 5167         | 210           | 18285       | 716         | 4979          | 180            | 16710        |
| 12462        | Cct3        | 225        | 326          | 581           | 5401        | 212         | 314           | 495            | 4962         |
| 12464        | Cct4        | 260        | 1682         | 2933          | 3982        | 285         | 1659          | 2879           | 3047         |
| 12465        | Cct5        | 264        | 5748         | 237           | 6285        | 278         | 4524          | 255            | 5682         |
| 12466        | Cct6a       | 263        | 137          | 1313          | 6236        | 252         | 133           | 1085           | 5376         |
| 12467        | Cct6b       | 5          | 795          | 33            | 43          | 5           | 898           | 31             | 36           |
| 12468        | Cct7        | 256        | 3310         | 48            | 3557        | 222         | 2426          | 47             | 2847         |
| 12469        | Cct8        | 318        | 1628         | 2346          | 4640        | 315         | 1363          | 2096           | 3229         |
| 12475        | Cd14        | 7          | 19           | 18            | 43          | 8           | 17            | 22             | 38           |
| 12476        | Cd151       | 18         | 231          | 113           | 571         | 22          | 307           | 143            | 490          |
| 12477        | Ctla4       | 74         | 9            | 624           | 1254        | 12          | 3             | 52             | 104          |
| 12478        | Cd19        | 7          | 39           | 26            | 27          | 784         | 7149          | 1845           | 9081         |
| 12479        | Cd1d1       | 29         | 1135         | 543           | 2991        | 50          | 1658          | 688            | 3818         |
| 12480        | Cd1d2       | 25         | 4            | 30            | 676         | 21          | 5             | 29             | 872          |
| 12481        | Cd2         | 1323       | 1746         | 2290          | 30141       | 767         | 902           | 1113           | 19333        |
| 12482        | Ms4a1       | 7          | 10           | 41            | 26          | 1546        | 13021         | 563            | 20127        |
| 12483        | Cd22        | 15         | 9            | 26            | 73          | 1011        | 3484          | 903            | 4031         |
| 12484        | Cd24a       | 11         | 20           | 23            | 191         | 609         | 4708          | 86             | 9652         |
| 12487        | Cd28        | 359        | 526          | 988           | 4678        | 12          | 16            | 25             | 64           |

| NCBI<br>Gene ID | Gene<br>Symbol | Affy.<br>CD4+ | Agilent<br>CD4+ | Illumina<br>CD4+ | Nimbl.<br>CD4+ | Affy.<br>CD19+ | Agilent<br>CD19+ | Illumina<br>CD19+ | Nimbl.<br>CD19+ |
|-----------------|----------------|---------------|-----------------|------------------|----------------|----------------|------------------|-------------------|-----------------|
| 12488           | Cd2ap          | 262           | 887             | 33               | 1636           | 367            | 977              | 33                | 1808            |
| 12489           | Cd33           | 7             | 11              | 31               | 26             | 7              | 12               | 30                | 25              |
| 12490           | Cd34           | 7             | 2               | 27               | 30             | 8              | 3                | 30                | 21              |
| 12491           | Cd36           | 5             | 10              | 19               | 19             | 81             | 381              | 20                | 1600            |
| 12492           | Scarb2         | 116           | 386             | 472              | 1307           | 85             | 224              | 309               | 711             |
| 12493           | Cd37           | 326           | 198             | 877              | 9655           | 1375           | 868              | 3662              | 24444           |
| 12495           | Entpd1         | 8             | 4               | 25               | 57             | 34             | 53               | 28                | 571             |
| 12496           | Entpd2         | 11            | 3               | 29               | 35             | 12             | 3                | 34                | 38              |
| 12497           | Entpd6         | 124           | 67              | 122              | 122            | 98             | 52               | 88                | 123             |
| 12499           | Entpd5         | 120           | 305             | 269              | 2829           | 104            | 227              | 215               | 2210            |
| 12500           | Cd3d           | 416           | 11628           | 10142            | 18816          | 9              | 208              | 47                | 101             |
| 12501           | Cd3e           | 466           | 484             | 6810             | 371            | 14             | 120              | 27                | 21              |
| 12502           | Cd3g           | 1682          | 3612            | 5989             | 28056          | 8              | 89               | 26                | 123             |
| 12504           | Cd4            | 479           | 102             | 306              | 2357           | 11             | 44               | 22                | 21              |
| 12505           | Cd44           | 32            | 360             | 285              | 1046           | 61             | 808              | 580               | 1697            |
| 12506           | Cd48           | 114           | 1465            | 270              | 8208           | 137            | 1490             | 306               | 8108            |
| 12507           | Cd5            | 463           | 9910            | 2027             | 11339          | 21             | 396              | 46                | 283             |
| 12508           | Cd53           | 1921          | 1504            | 2457             | 23232          | 1904           | 1161             | 2438              | 19701           |
| 12509           | Cd59a          | 4             | 4               | 15               | 41             | 5              | 12               | 41                | 139             |
| 12511           | Cd6            | 263           | 12889           | 4004             | 1872           | 9              | 357              | 25                | 33              |
| 12512           | Cd63           | 4             | 35              | 29               | 498            | 4              | 29               | 24                | 274             |
| 12514           | Cd68           | 34            | 26              | 177              | 805            | 30             | 34               | 206               | 1376            |
| 12515           | Cd69           | 285           | 527             | 1475             | 431            | 310            | 354              | 1125              | 225             |
| 12516           | Cd7            | 98            | 700             | 63               | 2121           | 15             | 26               | 26                | 245             |
| 12517           | Cd72           | 18            | 83              | 174              | 863            | 699            | 3795             | 4254              | 14840           |
| 12518           | Cd79a          | 10            | 16              | 20               | 290            | 1440           | 558              | 4447              | 20569           |
| 12519           | Cd80           | 6             | 5               | 221              | 75             | 8              | 4                | 214               | 196             |
| 12520           | Cd81           | 82            | 658             | 1073             | 742            | 476            | 5069             | 5102              | 2342            |
| 12522           | Cd83           | 19            | 96              | 67               | 82             | 274            | 5657             | 1937              | 1707            |
| 12523           | Cd84           | 211           | 254             | 458              | 3749           | 159            | 193              | 357               | 2024            |
| 12524           | Cd86           | 11            | 15              | 115              | 156            | 48             | 93               | 614               | 964             |
| 12525           | Cd8a           | 8             | 17              | 26               | 52             | 8              | 12               | 26                | 54              |
| 12527           | Cd9            | 177           | 1162            | 376              | 1039           | 80             | 535              | 172               | 545             |
| 12530           | Cdc25a         | 54            | 63              | 125              | 3958           | 42             | 48               | 88                | 2821            |
| 12531           | Cdc25b         | 50            | 457             | 95               | 3243           | 97             | 971              | 121               | 5874            |
| 12532           | Cdc25c         | 4             | 6               | 30               | 43             | 5              | 8                | 33                | 156             |
| 12534           | Cdc2a          | 7             | 7               | 39               | 1322           | 10             | 22               | 53                | 2611            |
| 12539           | Cdc37          | 194           | 8967            | 101              | 2988           | 141            | 8394             | 90                | 2328            |
| 12540           | Cdc42          | 599           | 4114            | 1361             | 22977          | 632            | 5106             | 1549              | 23350           |
| 12544           | Cdc45l         | 14            | 8               | 26               | 194            | 16             | 17               | 32                | 305             |
| 12545           | Cdc7           | 23            | 162             | 538              | 315            | 23             | 165              | 527               | 297             |
| 12549           | Cdgap          | 135           | 260             | 34               | 1031           | 39             | 60               | 32                | 116             |
| 12550           | Cdh1           | 7             | 3               | 28               | 95             | 7              | 3                | 28                | 68              |
| 12552           | Cdh11          | 5             | 459             | 29               | 25             | 5              | 349              | 29                | 40              |
| 12554           | Cdh13          | 7             | 23              | 29               | 29             | 8              | 18               | 28                | 42              |
| 12555           | Cdh15          | 12            | 14              | 26               | 52             | 11             | 16               | 26                | 57              |
| 12556           | Cdh16          | 12            | 15              | 23               | 121            | 11             | 13               | 24                | 134             |
| 12557           | Cdh17          | 5             | 3               | 23               | 20             | 13             | 10               | 24                | 1761            |
| 12558           | Cdh2           | 5             | 3               | 41               | 31             | 5              | 3                | 38                | 33              |
| 12560           | Cdh3           | 7             | 10              | 23               | 40             | 7              | 8                | 22                | 41              |
| 12561           | Cdh4           | 9             | 9               | 40               | 77             | 11             | 4                | 31                | 83              |

| NCBI<br>Gene ID | Gene<br>Symbol | Affy.<br>CD4+ | Agilent<br>CD4+ | Illumina<br>CD4+ | Nimbl.<br>CD4+ | Affy.<br>CD19+ | Agilent<br>CD19+ | Illumina<br>CD19+ | Nimbl.<br>CD19+ |
|-----------------|----------------|---------------|-----------------|------------------|----------------|----------------|------------------|-------------------|-----------------|
| 12562           | Cdh5           | 6             | 2               | 28               | 32             | 7              | 7                | 36                | 48              |
| 12563           | Cdh6           | 7             | 4               | 21               | 29             | 7              | 4                | 22                | 28              |
| 12564           | Cdh8           | 6             | 3               | 43               | 27             | 6              | 2                | 45                | 24              |
| 12565           | Cdh9           | 4             | 2               | 28               | 30             | 4              | 3                | 25                | 32              |
| 12566           | Cdk2           | 115           | 8               | 1197             | 296            | 136            | 11               | 1378              | 253             |
| 12567           | Cdk4           | 286           | 287             | 229              | 1887           | 305            | 272              | 215               | 1572            |
| 12568           | Cdk5           | 64            | 215             | 116              | 741            | 69             | 196              | 116               | 733             |
| 12569           | Cdk5r1         | 31            | 114             | 135              | 911            | 36             | 233              | 308               | 1843            |
| 12570           | Cdk5r2         | 34            | 67              | 28               | 50             | 32             | 70               | 29                | 53              |
| 12571           | Cdk6           | 71            | 312             | 33               | 37             | 121            | 496              | 32                | 43              |
| 12572           | Cdk7           | 77            | 96              | 161              | 17582          | 66             | 94               | 134               | 14689           |
| 12575           | Cdkn1a         | 6             | 6               | 26               | 94             | 7              | 11               | 34                | 214             |
| 12576           | Cdkn1b         | 381           | 803             | 55               | 1505           | 253            | 587              | 40                | 688             |
| 12577           | Cdkn1c         | 15            | 11              | 70               | 266            | 13             | 7                | 37                | 406             |
| 12578           | Cdkn2a         | 17            | 23              | 34               | 143            | 17             | 18               | 33                | 132             |
| 12579           | Cdkn2b         | 15            | 5               | 36               | 76             | 14             | 6                | 40                | 79              |
| 12580           | Cdkn2c         | 8             | 106             | 69               | 109            | 12             | 231              | 105               | 220             |
| 12581           | Cdkn2d         | 109           | 2836            | 480              | 1251           | 76             | 1477             | 234               | 601             |
| 12583           | Cdo1           | 19            | 17              | 21               | 637            | 11             | 10               | 25                | 311             |
| 12585           | Cdr2           | 48            | 60              | 249              | 704            | 19             | 9                | 56                | 82              |
| 12587           | Mia1           | 6             | 31              | 54               | 266            | 6              | 26               | 40                | 156             |
| 12590           | Cdx1           | 22            | 2               | 31               | 31             | 17             | 3                | 32                | 43              |
| 12591           | Cdx2           | 8             | 2               | 49               | 50             | 7              | 3                | 45                | 40              |
| 12592           | Cdx4           | 4             | 2               | 30               | 26             | 4              | 3                | 29                | 37              |
| 12593           | Cdyl           | 30            | 64              | 93               | 3612           | 26             | 51               | 93                | 3554            |
| 12606           | Cebpa          | 10            | 7               | 28               | 50             | 11             | 5                | 26                | 31              |
| 12607           | Cebpz          | 102           | 376             | 37               | 1457           | 114            | 330              | 30                | 1673            |
| 12608           | Cebpb          | 19            | 270             | 225              | 464            | 18             | 278              | 166               | 356             |
| 12609           | Cebpd          | 4             | 3               | 55               | 26             | 5              | 7                | 56                | 26              |
| 12611           | Cebpg          | 50            | 113             | 562              | 558            | 65             | 106              | 730               | 578             |
| 12613           | Cel            | 7             | 91              | 43               | 28             | 7              | 102              | 40                | 29              |
| 12614           | Celsr1         | 76            | 1212            | 425              | 127            | 15             | 41               | 31                | 43              |
| 12615           | Cenpa          | 73            | 71              | 1094             | 3785           | 107            | 108              | 1287              | 5908            |
| 12616           | Cenpb          | 52            | 50              | 272              | 199            | 56             | 103              | 477               | 374             |
| 12617           | Cenpc1         | 11            | 74              | 23               | 325            | 16             | 96               | 16                | 309             |
| 12622           | Cer1           | 8             | 2               | 23               | 19             | 7              | 3                | 30                | 18              |
| 12623           | Ces1           | 8             | 4               | 17               | 56             | 8              | 7                | 19                | 30              |
| 12626           | Cetn3          | 54            | 761             | 1760             | 2440           | 62             | 895              | 2175              | 2176            |
| 12627           | Cfc1           | 10            | 89              | 24               | 56             | 10             | 98               | 21                | 66              |
| 12628           | Cfh            | 4             | 4               | 37               | 20             | 4              | 3                | 27                | 42              |
| 12630           | Cfi            | 6             | 5               | 33               | 41             | 6              | 5                | 33                | 48              |
| 12631           | Cfl1           | 1132          | 5464            | 409              | 846            | 1007           | 4753             | 244               | 673             |
| 12632           | Cfl2           | 105           | 84              | 66               | 181            | 104            | 112              | 73                | 274             |
| 12633           | Cflar          | 155           | 2713            | 21               | 1266           | 84             | 1257             | 19                | 602             |
| 12638           | Cftr           | 4             | 6               | 45               | 31             | 5              | 7                | 39                | 39              |
| 12640           | Cga            | 5             | 9               | 24               | 33             | 5              | 13               | 42                | 21              |
| 12642           | Ch25h          | 5             | 7               | 33               | 35             | 5              | 5                | 27                | 24              |
| 12643           | Chad           | 11            | 54              | 28               | 28             | 14             | 48               | 32                | 26              |
| 12647           | Chat           | 7             | 32              | 28               | 25             | 7              | 29               | 28                | 34              |
| 12648           | Chd1           | 200           | 270             | 191              | 397            | 202            | 301              | 205               | 280             |
| 12649           | Chek1          | 9             | 6               | 24               | 38             | 11             | 19               | 31                | 82              |

| NCBI<br>Gene ID | Gene<br>Symbol | Affy.<br>CD4+ | Agilent<br>CD4+ | Illumina<br>CD4+ | Nimbl.<br>CD4+ | Affy.<br>CD19+ | Agilent<br>CD19+ | Illumina<br>CD19+ | Nimbl.<br>CD19+ |
|-----------------|----------------|---------------|-----------------|------------------|----------------|----------------|------------------|-------------------|-----------------|
| 12651           | Chkb           | 59            | 1282            | 846              | 2110           | 87             | 1485             | 1092              | 2259            |
| 12652           | Chga           | 14            | 23              | 33               | 50             | 13             | 24               | 30                | 62              |
| 12653           | Chgb           | 9             | 4               | 32               | 43             | 9              | 9                | 25                | 32              |
| 12654           | Chi3l1         | 8             | 2               | 32               | 17             | 8              | 3                | 30                | 19              |
| 12655           | Chi3l3         | 5             | 22              | 31               | 19             | 5              | 27               | 29                | 21              |
| 12659           | Ovgp1          | 29            | 160             | 283              | 1522           | 14             | 51               | 103               | 368             |
| 12660           | Chka           | 23            | 43              | 35               | 366            | 34             | 150              | 71                | 981             |
| 12661           | Chl1           | 5             | 8               | 30               | 32             | 5              | 3                | 29                | 39              |
| 12662           | Chm            | 166           | 279             | 31               | 984            | 162            | 189              | 29                | 685             |
| 12663           | Chml           | 12            | 3               | 20               | 30             | 23             | 6                | 26                | 30              |
| 12667           | Chrd           | 10            | 64              | 30               | 65             | 9              | 64               | 33                | 80              |
| 12669           | Chrm1          | 24            | 13              | 22               | 28             | 20             | 15               | 24                | 25              |
| 12671           | Chrm3          | 8             | 6               | 34               | 30             | 7              | 5                | 31                | 41              |
| 12672           | Chrm4          | 14            | 46              | 22               | 60             | 14             | 33               | 24                | 59              |
| 12675           | Chuk           | 109           | 210             | 441              | 1025           | 133            | 206              | 532               | 1084            |
| 12677           | Chx10          | 6             | 5               | 19               | 17             | 6              | 4                | 20                | 21              |
| 12683           | Cidea          | 5             | 4               | 24               | 42             | 6              | 4                | 25                | 80              |
| 12684           | Cideb          | 14            | 2               | 43               | 31             | 13             | 3                | 45                | 32              |
| 12686           | Elovl3         | 4             | 2               | 29               | 35             | 4              | 3                | 33                | 34              |
| 12695           | Inadl          | 70            | 126             | 68               | 128            | 33             | 25               | 51                | 113             |
| 12696           | Cirbp          | 153           | 1554            | 200              | 5905           | 165            | 1708             | 198               | 5025            |
| 12700           | Cish           | 30            | 482             | 616              | 144            | 11             | 28               | 46                | 64              |
| 12702           | Socs3          | 116           | 1968            | 817              | 851            | 31             | 208              | 84                | 111             |
| 12703           | Socs1          | 44            | 1540            | 272              | 92             | 23             | 384              | 60                | 62              |
| 12704           | Cit            | 11            | 54              | 22               | 81             | 15             | 39               | 29                | 96              |
| 12705           | Cited1         | 21            | 81              | 30               | 36             | 16             | 63               | 27                | 36              |
| 12709           | Ckb            | 41            | 262             | 542              | 181            | 30             | 48               | 53                | 82              |
| 12715           | Ckm            | 15            | 6               | 31               | 36             | 16             | 7                | 26                | 54              |
| 12716           | Ckmt1          | 9             | 24              | 32               | 56             | 9              | 26               | 30                | 103             |
| 12721           | Coro1a         | 1146          | 31080           | 15190            | 19990          | 1140           | 40381            | 13871             | 17816           |
| 12722           | Clca1          | 4             | 2               | 20               | 31             | 4              | 3                | 28                | 27              |
| 12723           | Clcn1          | 8             | 50              | 44               | 24             | 9              | 51               | 47                | 27              |
| 12724           | Clcn2          | 19            | 70              | 46               | 84             | 18             | 41               | 38                | 54              |
| 12725           | Clcn3          | 51            | 77              | 758              | 3713           | 60             | 99               | 803               | 3278            |
| 12727           | Clcn4-2        | 103           | 1106            | 53               | 2360           | 99             | 878              | 49                | 2134            |
| 12728           | Clcn5          | 22            | 28              | 23               | 47             | 54             | 132              | 27                | 89              |
| 12729           | Clns1a         | 65            | 428             | 999              | 2090           | 62             | 426              | 960               | 1884            |
| 12733           | Clcnka         | 11            | 23              | 28               | 21             | 10             | 19               | 30                | 18              |
| 12737           | Cldn1          | 4             | 2               | 21               | 53             | 4              | 3                | 21                | 49              |
| 12738           | Cldn2          | 6             | 2               | 24               | 17             | 6              | 4                | 25                | 33              |
| 12739           | Cldn3          | 17            | 22              | 25               | 96             | 17             | 27               | 23                | 82              |
| 12740           | Cldn4          | 22            | 2               | 51               | 32             | 19             | 3                | 39                | 23              |
| 12741           | Cldn5          | 13            | 24              | 37               | 50             | 10             | 16               | 38                | 31              |
| 12745           | Clgn           | 5             | 23              | 34               | 45             | 5              | 25               | 35                | 50              |
| 12747           | Clk1           | 884           | 5667            | 969              | 21167          | 928            | 5008             | 988               | 18468           |
| 12748           | Clk2           | 240           | 201             | 1113             | 8543           | 252            | 186              | 915               | 7996            |
| 12750           | Clk4           | 239           | 2182            | 605              | 3554           | 267            | 2306             | 618               | 2896            |
| 12753           | Clock          | 57            | 93              | 342              | 2134           | 62             | 102              | 400               | 1180            |
| 12757           | Clta           | 150           | 5340            | 150              | 12179          | 227            | 8574             | 197               | 14838           |
| 12759           | Clu            | 12            | 7               | 19               | 26             | 11             | 3                | 24                | 24              |
| 12763           | Cmah           | 265           | 513             | 176              | 4978           | 365            | 644              | 221               | 5193            |

| NCBI<br>Gene ID | Gene<br>Symbol | Affy.<br>CD4+ | Agilent<br>CD4+ | Illumina<br>CD4+ | Nimbl.<br>CD4+ | Affy.<br>CD19+ | Agilent<br>CD19+ | Illumina<br>CD19+ | Nimbl.<br>CD19+ |
|-----------------|----------------|---------------|-----------------|------------------|----------------|----------------|------------------|-------------------|-----------------|
| 12764           | Cmas           | 139           | 159             | 835              | 897            | 80             | 77               | 436               | 536             |
| 12766           | Cxcr3          | 27            | 157             | 104              | 425            | 14             | 42               | 35                | 74              |
| 12767           | Cxcr4          | 427           | 244             | 521              | 529            | 710            | 373              | 776               | 628             |
| 12768           | Ccr1           | 5             | 2               | 38               | 25             | 6              | 3                | 33                | 1086            |
| 12769           | Ccr9           | 24            | 143             | 21               | 445            | 11             | 30               | 21                | 45              |
| 12770           | Ccr111         | 5             | 14              | 28               | 20             | 5              | 16               | 28                | 20              |
| 12771           | Ccr3           | 5             | 23              | 33               | 59             | 5              | 26               | 29                | 126             |
| 12772           | Ccr2           | 5             | 5               | 29               | 37             | 5              | 3                | 24                | 21              |
| 12773           | Ccr4           | 8             | 12              | 29               | 22             | 6              | 9                | 36                | 20              |
| 12774           | Ccr5           | 5             | 7               | 23               | 37             | 6              | 14               | 25                | 78              |
| 12775           | Ccr7           | 669           | 3253            | 4986             | 6820           | 264            | 1090             | 1753              | 1899            |
| 12776           | Ccr8           | 7             | 4               | 36               | 38             | 4              | 4                | 27                | 35              |
| 12780           | Abcc2          | 6             | 2               | 42               | 31             | 6              | 3                | 39                | 41              |
| 12788           | Cnga1          | 12            | 499             | 37               | 239            | 5              | 15               | 24                | 25              |
| 12789           | Cnga2          | 5             | 64              | 27               | 38             | 5              | 48               | 28                | 34              |
| 12790           | Cnga3          | 7             | 2               | 29               | 24             | 8              | 4                | 26                | 22              |
| 12793           | Cnih           | 93            | 1227            | 348              | 884            | 94             | 1194             | 351               | 816             |
| 12795           | Plk3           | 44            | 249             | 324              | 306            | 37             | 163              | 224               | 170             |
| 12796           | Camp           | 11            | 2               | 57               | 31             | 11             | 3                | 55                | 32              |
| 12797           | Cnn1           | 8             | 8               | 21               | 49             | 8              | 10               | 19                | 57              |
| 12798           | Cnn2           | 557           | 6122            | 2318             | 2396           | 361            | 3349             | 1269              | 1407            |
| 12801           | Cnr1           | 5             | 16              | 37               | 42             | 5              | 49               | 39                | 62              |
| 12802           | Cnr2           | 25            | 139             | 115              | 405            | 253            | 1248             | 1190              | 2733            |
| 12804           | Cntfr          | 12            | 34              | 31               | 58             | 13             | 40               | 34                | 59              |
| 12805           | Cntn1          | 5             | 3               | 28               | 33             | 6              | 4                | 25                | 50              |
| 12807           | Hps3           | 125           | 312             | 568              | 3413           | 216            | 453              | 862               | 4396            |
| 12808           | Cobl           | 11            | 12              | 31               | 23             | 11             | 7                | 29                | 41              |
| 12810           | Coch           | 12            | 3               | 26               | 30             | 13             | 3                | 23                | 41              |
| 12812           | Coil           | 15            | 416             | 121              | 279            | 15             | 421              | 115               | 240             |
| 12813           | Col10a1        | 16            | 6               | 43               | 34             | 16             | 7                | 43                | 57              |
| 12814           | Col11a1        | 14            | 23              | 29               | 31             | 13             | 36               | 31                | 39              |
| 12815           | Col11a2        | 41            | 157             | 43               | 81             | 29             | 63               | 39                | 58              |
| 12816           | Col12a1        | 5             | 2               | 28               | 53             | 5              | 3                | 25                | 48              |
| 12817           | Col13a1        | 22            | 11              | 28               | 126            | 22             | 10               | 26                | 107             |
| 12818           | Col14a1        | 8             | 5               | 42               | 115            | 8              | 3                | 37                | 165             |
| 12819           | Col15a1        | 13            | 9               | 28               | 33             | 12             | 5                | 26                | 28              |
| 12821           | Col17a1        | 17            | 3               | 34               | 33             | 17             | 3                | 29                | 39              |
| 12822           | Col18a1        | 17            | 16              | 23               | 48             | 15             | 12               | 24                | 43              |
| 12823           | Col19a1        | 7             | 3               | 21               | 23             | 7              | 5                | 20                | 46              |
| 12824           | Col2a1         | 29            | 52              | 27               | 106            | 29             | 59               | 29                | 82              |
| 12825           | Col3a1         | 14            | 9               | 28               | 32             | 12             | 8                | 23                | 30              |
| 12826           | Col4a1         | 13            | 15              | 19               | 46             | 15             | 16               | 18                | 67              |
| 12827           | Col4a2         | 18            | 5               | 26               | 38             | 18             | 7                | 26                | 27              |
| 12828           | Col4a3         | 13            | 6               | 22               | 14             | 11             | 3                | 25                | 19              |
| 12829           | Col4a4         | 21            | 251             | 22               | 68             | 19             | 232              | 26                | 66              |
| 12830           | Col4a5         | 11            | 3               | 26               | 36             | 10             | 3                | 24                | 42              |
| 12831           | Col5a1         | 17            | 8               | 22               | 27             | 17             | 8                | 24                | 28              |
| 12832           | Col5a2         | 8             | 3               | 29               | 35             | 9              | 3                | 28                | 27              |
| 12833           | Col6a1         | 25            | 2               | 33               | 42             | 22             | 3                | 32                | 40              |
| 12834           | Col6a2         | 19            | 29              | 106              | 63             | 19             | 19               | 87                | 88              |
| 12835           | Col6a3         | 9             | 3               | 37               | 28             | 8              | 5                | 39                | 29              |

| NCBI<br>Gene ID | Gene<br>Symbol | Affy.<br>CD4+ | Agilent<br>CD4+ | Illumina<br>CD4+ | Nimbl.<br>CD4+ | Affy.<br>CD19+ | Agilent<br>CD19+ | Illumina<br>CD19+ | Nimbl.<br>CD19+ |
|-----------------|----------------|---------------|-----------------|------------------|----------------|----------------|------------------|-------------------|-----------------|
| 12836           | Col7a1         | 28            | 135             | 50               | 165            | 27             | 84               | 39                | 159             |
| 12837           | Col8a1         | 8             | 23              | 34               | 40             | 8              | 22               | 26                | 36              |
| 12839           | Col9a1         | 10            | 10              | 27               | 46             | 10             | 9                | 29                | 79              |
| 12840           | Col9a2         | 38            | 50              | 26               | 61             | 39             | 37               | 24                | 60              |
| 12841           | Col9a3         | 32            | 17              | 28               | 304            | 26             | 7                | 34                | 143             |
| 12842           | Col1a1         | 21            | 12              | 27               | 57             | 20             | 9                | 29                | 72              |
| 12843           | Col1a2         | 15            | 50              | 25               | 32             | 16             | 30               | 20                | 37              |
| 12845           | Comp           | 11            | 19              | 32               | 118            | 10             | 3                | 27                | 57              |
| 12846           | Comt           | 41            | 150             | 403              | 780            | 61             | 198              | 497               | 1007            |
| 12847           | Copa           | 404           | 875             | 1481             | 1095           | 456            | 834              | 1475              | 654             |
| 12848           | Cops2          | 87            | 451             | 661              | 5633           | 85             | 430              | 656               | 5503            |
| 12850           | Coq7           | 17            | 80              | 55               | 232            | 19             | 130              | 97                | 310             |
| 12854           | Cort           | 21            | 52              | 28               | 136            | 22             | 43               | 35                | 193             |
| 12856           | Cox17          | 52            | 20325           | 987              | 6774           | 62             | 17318            | 1128              | 10250           |
| 12857           | Cox4i1         | 185           | 8899            | 6914             | 19516          | 189            | 8535             | 5622              | 17621           |
| 12858           | Cox5a          | 93            | 4581            | 1829             | 6187           | 90             | 3862             | 1763              | 6644            |
| 12859           | Cox5b          | 176           | 4100            | 3911             | 22223          | 214            | 5482             | 4281              | 27979           |
| 12861           | Cox6a1         | 181           | 20622           | 2832             | 14359          | 184            | 17458            | 2526              | 15020           |
| 12862           | Cox6a2         | 19            | 14              | 22               | 161            | 21             | 21               | 24                | 238             |
| 12864           | Cox6c          | 199           | 3167            | 2809             | 4881           | 210            | 3458             | 2924              | 6964            |
| 12865           | Cox7a1         | 9             | 49              | 31               | 106            | 8              | 70               | 34                | 190             |
| 12866           | Cox7a2         | 39            | 1753            | 154              | 9792           | 38             | 1565             | 206               | 10461           |
| 12867           | Cox7c          | 176           | 79              | 3899             | 26081          | 168            | 73               | 3169              | 20344           |
| 12868           | Cox8a          | 71            | 6924            | 2655             | 16264          | 86             | 9073             | 2884              | 17851           |
| 12869           | Cox8b          | 8             | 3               | 22               | 67             | 9              | 3                | 29                | 68              |
| 12870           | Cp             | 5             | 4               | 26               | 29             | 5              | 5                | 27                | 30              |
| 12873           | Cpa3           | 5             | 3               | 30               | 44             | 5              | 3                | 25                | 34              |
| 12874           | Cpd            | 5             | 3               | 29               | 24             | 6              | 8                | 32                | 18              |
| 12876           | Cpe            | 5             | 42              | 48               | 37             | 5              | 27               | 52                | 30              |
| 12877           | Cpeb1          | 6             | 5               | 113              | 24             | 5              | 6                | 107               | 26              |
| 12879           | Cys1           | 8             | 2               | 34               | 16             | 7              | 3                | 29                | 20              |
| 12889           | Cplx1          | 8             | 17              | 21               | 62             | 8              | 13               | 24                | 41              |
| 12890           | Cplx2          | 11            | 77              | 23               | 58             | 13             | 76               | 27                | 116             |
| 12891           | Cpne6          | 12            | 13              | 33               | 118            | 11             | 13               | 32                | 151             |
| 12892           | Cpox           | 39            | 68              | 24               | 387            | 47             | 108              | 18                | 699             |
| 12894           | Cpt1a          | 147           | 612             | 42               | 1288           | 180            | 739              | 40                | 1450            |
| 12895           | Cpt1b          | 22            | 46              | 74               | 420            | 28             | 78               | 89                | 678             |
| 12896           | Cpt2           | 30            | 316             | 346              | 447            | 35             | 456              | 522               | 520             |
| 12902           | Cr2            | 6             | 3               | 29               | 43             | 1160           | 1883             | 33                | 5809            |
| 12903           | Crabp1         | 11            | 3               | 28               | 86             | 10             | 5                | 30                | 118             |
| 12904           | Crabp2         | 6             | 3               | 21               | 47             | 5              | 3                | 24                | 42              |
| 12905           | Cradd          | 34            | 154             | 55               | 487            | 29             | 108              | 40                | 450             |
| 12908           | Crat           | 31            | 34              | 32               | 66             | 66             | 188              | 99                | 564             |
| 12909           | Crcp           | 26            | 227             | 338              | 1131           | 30             | 339              | 350               | 1110            |
| 12912           | Creb1          | 354           | 497             | 81               | 1908           | 347            | 298              | 74                | 2118            |
| 12913           | Creb3          | 93            | 455             | 685              | 1496           | 77             | 365              | 545               | 1192            |
| 12914           | Crebbp         | 575           | 987             | 109              | 4032           | 459            | 632              | 115               | 2711            |
| 12915           | Crebl1         | 105           | 132             | 735              | 551            | 135            | 224              | 847               | 677             |
| 12916           | Crem           | 19            | 51              | 53               | 1231           | 21             | 72               | 70                | 1446            |
| 12919           | Crhbp          | 8             | 5               | 26               | 15             | 8              | 5                | 28                | 19              |
| 12921           | Crhr1          | 10            | 30              | 31               | 84             | 10             | 35               | 28                | 202             |



| NCBI<br>Gene ID | Gene<br>Symbol | Affy.<br>CD4+ | Agilent<br>CD4+ | Illumina<br>CD4+ | Nimbl.<br>CD4+ | Affy.<br>CD19+ | Agilent<br>CD19+ | Illumina<br>CD19+ | Nimbl.<br>CD19+ |
|-----------------|----------------|---------------|-----------------|------------------|----------------|----------------|------------------|-------------------|-----------------|
| 12922           | Crhr2          | 8             | 48              | 35               | 93             | 8              | 44               | 31                | 89              |
| 12925           | Crip1          | 232           | 2820            | 1107             | 4449           | 295            | 3358             | 1146              | 5870            |
| 12927           | Bcar1          | 8             | 7               | 32               | 80             | 8              | 9                | 32                | 75              |
| 12928           | Crk            | 155           | 212             | 53               | 6442           | 187            | 227              | 52                | 5075            |
| 12929           | Crkl           | 193           | 65              | 882              | 506            | 199            | 53               | 953               | 405             |
| 12931           | Crlf1          | 15            | 61              | 27               | 30             | 14             | 41               | 25                | 29              |
| 12933           | Crmp1          | 16            | 46              | 32               | 109            | 13             | 9                | 27                | 56              |
| 12934           | Dpysl2         | 221           | 1471            | 2313             | 6662           | 107            | 449              | 1114              | 2734            |
| 12944           | Crp            | 7             | 3               | 28               | 42             | 6              | 4                | 28                | 51              |
| 12945           | Dmbt1          | 7             | 27              | 44               | 50             | 5              | 16               | 31                | 49              |
| 12946           | Crry           | 42            | 71              | 273              | 8565           | 66             | 63               | 286               | 8340            |
| 12950           | Hapln1         | 4             | 3               | 32               | 15             | 4              | 3                | 24                | 18              |
| 12951           | Crx            | 6             | 2               | 26               | 58             | 5              | 3                | 30                | 49              |
| 12952           | Cry1           | 72            | 15              | 19               | 463            | 43             | 8                | 14                | 221             |
| 12953           | Cry2           | 40            | 64              | 106              | 1125           | 35             | 45               | 70                | 838             |
| 12954           | Cryaa          | 13            | 7               | 23               | 42             | 13             | 8                | 26                | 58              |
| 12955           | Cryab          | 9             | 16              | 30               | 51             | 9              | 22               | 25                | 50              |
| 12957           | Cryba1         | 7             | 6               | 25               | 78             | 6              | 6                | 19                | 55              |
| 12958           | Cryba2         | 11            | 4               | 21               | 69             | 10             | 4                | 21                | 65              |
| 12959           | Cryba4         | 8             | 3               | 36               | 98             | 7              | 7                | 39                | 75              |
| 12960           | Crybb1         | 20            | 18              | 28               | 100            | 21             | 19               | 27                | 70              |
| 12961           | Crybb2         | 26            | 10              | 28               | 29             | 27             | 11               | 29                | 29              |
| 12962           | Crybb3         | 15            | 21              | 45               | 147            | 16             | 19               | 41                | 146             |
| 12964           | Cryga          | 10            | 26              | 25               | 40             | 11             | 36               | 24                | 49              |
| 12966           | Crygc          | 7             | 10              | 32               | 49             | 7              | 12               | 32                | 63              |
| 12967           | Crygd          | 4             | 58              | 21               | 53             | 5              | 48               | 25                | 49              |
| 12968           | Cryge          | 6             | 2               | 23               | 87             | 7              | 3                | 16                | 126             |
| 12969           | Crygf          | 8             | 28              | 18               | 73             | 8              | 26               | 20                | 53              |
| 12970           | Crygs          | 8             | 15              | 28               | 150            | 7              | 19               | 26                | 128             |
| 12971           | Crym           | 18            | 2               | 15               | 46             | 16             | 4                | 23                | 52              |
| 12972           | Cryz           | 9             | 28              | 35               | 143            | 13             | 40               | 35                | 234             |
| 12974           | Cs             | 209           | 3331            | 919              | 3929           | 239            | 3586             | 977               | 3191            |
| 12977           | Csf1           | 8             | 10              | 28               | 79             | 9              | 34               | 47                | 123             |
| 12978           | Csf1r          | 9             | 62              | 25               | 36             | 10             | 64               | 27                | 234             |
| 12981           | Csf2           | 5             | 7               | 30               | 73             | 5              | 4                | 25                | 118             |
| 12982           | Csf2ra         | 23            | 86              | 71               | 55             | 45             | 397              | 244               | 137             |
| 12984           | Csf2rb2        | 11            | 6               | 25               | 20             | 12             | 23               | 24                | 142             |
| 12985           | Csf3           | 9             | 2               | 29               | 32             | 11             | 3                | 23                | 42              |
| 12986           | Csf3r          | 7             | 2               | 32               | 31             | 7              | 3                | 32                | 32              |
| 12988           | Csk            | 447           | 924             | 2078             | 6215           | 702            | 1259             | 2921              | 9045            |
| 12995           | Csnk2a1        | 242           | 670             | 47               | 5330           | 233            | 640              | 45                | 4183            |
| 13000           | Csnk2a2        | 198           | 476             | 1109             | 3002           | 211            | 639              | 800               | 1837            |
| 13001           | Csnk2b         | 345           | 2195            | 31               | 11752          | 328            | 1759             | 31                | 10116           |
| 13002           | Dnajc5         | 181           | 1463            | 1730             | 1089           | 165            | 1006             | 1615              | 790             |
| 13007           | Csrp1          | 158           | 192             | 369              | 1190           | 115            | 120              | 239               | 757             |
| 13008           | Csrp2          | 10            | 27              | 56               | 100            | 21             | 566              | 312               | 712             |
| 13009           | Csrp3          | 8             | 4               | 38               | 124            | 7              | 4                | 37                | 134             |
| 13010           | Cst3           | 128           | 546             | 850              | 2796           | 359            | 1706             | 2208              | 8016            |
| 13011           | Cst7           | 18            | 103             | 53               | 1309           | 7              | 3                | 23                | 56              |
| 13012           | Cst8           | 5             | 2               | 38               | 22             | 5              | 4                | 31                | 20              |
| 13013           | Cst9           | 4             | 4               | 19               | 18             | 4              | 9                | 26                | 21              |

| NCBI<br>Gene ID | Gene<br>Symbol | Affy.<br>CD4+ | Agilent<br>CD4+ | Illumina<br>CD4+ | Nimbl.<br>CD4+ | Affy.<br>CD19+ | Agilent<br>CD19+ | Illumina<br>CD19+ | Nimbl.<br>CD19+ |
|-----------------|----------------|---------------|-----------------|------------------|----------------|----------------|------------------|-------------------|-----------------|
| 13014           | Cstb           | 33            | 356             | 1256             | 675            | 34             | 429              | 1486              | 1021            |
| 13016           | Ctbp1          | 266           | 1432            | 26               | 893            | 261            | 1234             | 25                | 806             |
| 13017           | Ctbp2          | 6             | 5               | 33               | 219            | 6              | 5                | 35                | 148             |
| 13018           | Ctcf           | 258           | 988             | 1050             | 2556           | 269            | 792              | 986               | 2209            |
| 13019           | Ctf1           | 6             | 4               | 21               | 93             | 6              | 3                | 24                | 127             |
| 13024           | Ctla2a         | 5             | 98              | 17               | 480            | 4              | 3                | 20                | 36              |
| 13026           | Pcyt1a         | 15            | 20              | 72               | 29             | 15             | 20               | 82                | 29              |
| 13030           | Ctsb           | 128           | 1124            | 1913             | 756            | 139            | 1076             | 1596              | 682             |
| 13032           | Ctsc           | 140           | 357             | 426              | 3337           | 461            | 1687             | 1455              | 8137            |
| 13033           | Ctsd           | 328           | 3250            | 920              | 5953           | 91             | 793              | 229               | 1476            |
| 13034           | Ctse           | 94            | 77              | 94               | 9153           | 80             | 46               | 69                | 13363           |
| 13035           | Ctsg           | 5             | 33              | 16               | 42             | 6              | 28               | 19                | 44              |
| 13036           | Ctsh           | 5             | 22              | 21               | 32             | 180            | 12956            | 1997              | 3553            |
| 13038           | Ctsk           | 10            | 6               | 56               | 56             | 9              | 9                | 59                | 48              |
| 13039           | Ctsl           | 21            | 236             | 29               | 3167           | 12             | 134              | 24                | 1705            |
| 13040           | Ctss           | 257           | 4197            | 296              | 12593          | 746            | 15702            | 904               | 22791           |
| 13041           | Ctsw           | 27            | 458             | 417              | 3611           | 11             | 21               | 31                | 79              |
| 13043           | Cttn           | 8             | 39              | 57               | 66             | 7              | 40               | 51                | 38              |
| 13046           | Cugbp1         | 328           | 1745            | 174              | 16298          | 262            | 1127             | 114               | 11743           |
| 13047           | Cutl1          | 72            | 231             | 210              | 3862           | 102            | 308              | 244               | 4588            |
| 13048           | Cutl2          | 12            | 2               | 36               | 57             | 12             | 3                | 39                | 96              |
| 13051           | Cx3cr1         | 12            | 9               | 22               | 46             | 14             | 9                | 26                | 41              |
| 13052           | Cxadr          | 7             | 5               | 31               | 72             | 7              | 3                | 28                | 44              |
| 13056           | Cyb561         | 9             | 4               | 33               | 30             | 8              | 3                | 36                | 20              |
| 13057           | Cyba           | 223           | 716             | 3952             | 15814          | 406            | 1584             | 6806              | 22678           |
| 13058           | Cybb           | 8             | 4               | 29               | 25             | 650            | 1056             | 827               | 2629            |
| 13063           | Cycs           | 88            | 1729            | 780              | 19869          | 75             | 1542             | 734               | 18287           |
| 13067           | Cyct           | 4             | 3               | 19               | 23             | 4              | 3                | 24                | 26              |
| 13070           | Cyp11a1        | 7             | 3               | 35               | 25             | 6              | 6                | 45                | 29              |
| 13072           | Cyp11b2        | 8             | 10              | 23               | 26             | 9              | 3                | 18                | 26              |
| 13074           | Cyp17a1        | 7             | 124             | 30               | 33             | 6              | 94               | 27                | 33              |
| 13075           | Cyp19a1        | 5             | 6               | 18               | 23             | 5              | 7                | 20                | 31              |
| 13076           | Cyp1a1         | 5             | 2               | 28               | 41             | 5              | 3                | 32                | 36              |
| 13077           | Cyp1a2         | 4             | 3               | 25               | 50             | 5              | 3                | 27                | 47              |
| 13078           | Cyp1b1         | 5             | 3               | 35               | 27             | 5              | 3                | 33                | 34              |
| 13079           | Cyp21a1        | 7             | 12              | 29               | 52             | 8              | 12               | 31                | 60              |
| 13081           | Cyp24a1        | 7             | 2               | 24               | 64             | 8              | 4                | 26                | 56              |
| 13082           | Cyp26a1        | 6             | 10              | 31               | 184            | 5              | 8                | 30                | 95              |
| 13085           | Cyp2a12        | 5             | 2               | 29               | 54             | 5              | 3                | 25                | 73              |
| 13086           | Cyp2a4         | 7             | 28              | 30               | 92             | 6              | 25               | 26                | 82              |
| 13088           | Cyp2b10        | 6             | 8               | 27               | 19             | 5              | 9                | 31                | 20              |
| 13089           | Cyp2b13        | 5             | 19              | 22               | 18             | 4              | 29               | 23                | 17              |
| 13090           | Cyp2b19        | 4             | 48              | 30               | 60             | 5              | 52               | 32                | 36              |
| 13094           | Cyp2b9         | 6             | 3               | 21               | 34             | 5              | 12               | 22                | 37              |
| 13095           | Cyp2c29        | 4             | 6               | 34               | 46             | 4              | 9                | 29                | 49              |
| 13096           | Cyp2c37        | 9             | 30              | 24               | 16             | 11             | 23               | 26                | 18              |
| 13097           | Cyp2c38        | 4             | 3               | 25               | 18             | 4              | 3                | 31                | 18              |
| 13098           | Cyp2c39        | 4             | 4               | 43               | 41             | 4              | 3                | 36                | 43              |
| 13099           | Cyp2c40        | 6             | 3               | 21               | 32             | 5              | 10               | 19                | 38              |
| 13101           | Cyp2d10        | 6             | 45              | 27               | 17             | 7              | 38               | 22                | 15              |
| 13105           | Cyp2d9         | 6             | 149             | 30               | 35             | 4              | 115              | 29                | 44              |

| NCBI<br>Gene ID | Gene<br>Symbol | Affy.<br>CD4+ | Agilent<br>CD4+ | Illumina<br>CD4+ | Nimbl.<br>CD4+ | Affy.<br>CD19+ | Agilent<br>CD19+ | Illumina<br>CD19+ | Nimbl.<br>CD19+ |
|-----------------|----------------|---------------|-----------------|------------------|----------------|----------------|------------------|-------------------|-----------------|
| 13106           | Cyp2e1         | 5             | 2               | 31               | 32             | 6              | 2                | 31                | 24              |
| 13107           | Cyp2f2         | 6             | 2               | 26               | 24             | 5              | 3                | 25                | 28              |
| 13108           | Cyp2g1         | 5             | 14              | 25               | 44             | 5              | 10               | 23                | 25              |
| 13109           | Cyp2j5         | 5             | 3               | 18               | 32             | 6              | 3                | 19                | 34              |
| 13110           | Cyp2j6         | 5             | 3               | 26               | 25             | 5              | 3                | 26                | 27              |
| 13112           | Cyp3a11        | 4             | 14              | 26               | 18             | 4              | 12               | 27                | 21              |
| 13113           | Cyp3a13        | 4             | 2               | 30               | 19             | 4              | 3                | 30                | 21              |
| 13114           | Cyp3a16        | 4             | 7               | 19               | 14             | 4              | 5                | 23                | 17              |
| 13115           | Cyp27b1        | 7             | 82              | 23               | 17             | 7              | 65               | 29                | 20              |
| 13116           | Cyp46a1        | 9             | 74              | 37               | 44             | 8              | 84               | 30                | 71              |
| 13117           | Cyp4a10        | 5             | 21              | 28               | 17             | 5              | 42               | 31                | 17              |
| 13119           | Cyp4a14        | 4             | 24              | 23               | 21             | 4              | 23               | 18                | 30              |
| 13120           | Cyp4b1         | 8             | 3               | 26               | 37             | 8              | 4                | 24                | 39              |
| 13121           | Cyp51          | 30            | 73              | 395              | 366            | 24             | 42               | 338               | 183             |
| 13122           | Cyp7a1         | 4             | 18              | 23               | 39             | 4              | 19               | 20                | 39              |
| 13123           | Cyp7b1         | 5             | 2               | 21               | 21             | 5              | 3                | 20                | 25              |
| 13124           | Cyp8b1         | 9             | 3               | 29               | 40             | 10             | 3                | 26                | 32              |
| 13131           | Dab1           | 5             | 6               | 25               | 61             | 5              | 3                | 27                | 56              |
| 13132           | Dab2           | 8             | 12              | 22               | 75             | 7              | 11               | 22                | 80              |
| 13134           | Dach1          | 5             | 7               | 31               | 24             | 5              | 7                | 34                | 19              |
| 13135           | Dad1           | 297           | 2155            | 2752             | 22079          | 247            | 1599             | 2075              | 19578           |
| 13137           | Daf2           | 9             | 3               | 23               | 53             | 25             | 10               | 34                | 144             |
| 13138           | Dag1           | 49            | 29              | 206              | 146            | 51             | 29               | 158               | 171             |
| 13139           | Dgka           | 2643          | 10569           | 6836             | 14597          | 639            | 1825             | 1424              | 3455            |
| 13142           | Dao1           | 5             | 13              | 31               | 115            | 5              | 11               | 34                | 108             |
| 13143           | Dapk2          | 6             | 2               | 53               | 15             | 6              | 4                | 59                | 16              |
| 13144           | Dapk3          | 147           | 40              | 100              | 654            | 190            | 37               | 84                | 685             |
| 13162           | Slc6a3         | 13            | 8               | 18               | 24             | 15             | 7                | 18                | 24              |
| 13163           | Daxx           | 60            | 3059            | 626              | 479            | 55             | 2340             | 454               | 314             |
| 13164           | Dazl           | 4             | 14              | 32               | 18             | 4              | 7                | 32                | 21              |
| 13166           | Dbh            | 7             | 38              | 24               | 43             | 6              | 33               | 27                | 36              |
| 13167           | Dbi            | 54            | 955             | 1474             | 811            | 53             | 830              | 1508              | 821             |
| 13168           | Dbil5          | 5             | 4               | 57               | 32             | 6              | 4                | 51                | 38              |
| 13169           | Dbnl           | 156           | 1172            | 283              | 3205           | 199            | 1811             | 375               | 4099            |
| 13170           | Dbp            | 52            | 1600            | 753              | 804            | 38             | 790              | 366               | 587             |
| 13171           | Dbt            | 45            | 24              | 315              | 328            | 50             | 14               | 345               | 170             |
| 13172           | Dbx1           | 9             | 14              | 42               | 37             | 9              | 8                | 45                | 37              |
| 13176           | Dcc            | 8             | 4               | 36               | 23             | 7              | 3                | 36                | 26              |
| 13177           | Dci            | 51            | 434             | 453              | 1647           | 67             | 639              | 616               | 2025            |
| 13178           | Dck            | 114           | 365             | 177              | 321            | 108            | 300              | 155               | 249             |
| 13179           | Dcn            | 5             | 5               | 29               | 41             | 5              | 3                | 29                | 52              |
| 13185           | Dscr3          | 90            | 947             | 67               | 5526           | 75             | 919              | 63                | 4009            |
| 13190           | Dct            | 6             | 4               | 24               | 24             | 5              | 2                | 25                | 31              |
| 13191           | Dctn1          | 117           | 771             | 274              | 126            | 96             | 522              | 183               | 187             |
| 13193           | Dcx            | 5             | 4               | 28               | 26             | 5              | 4                | 21                | 19              |
| 13194           | Ddb1           | 256           | 218             | 717              | 1944           | 285            | 173              | 620               | 1555            |
| 13195           | Ddc            | 8             | 20              | 39               | 127            | 7              | 11               | 24                | 42              |
| 13196           | Ddef1          | 156           | 276             | 377              | 8275           | 112            | 207              | 252               | 7139            |
| 13197           | Gadd45a        | 69            | 198             | 277              | 567            | 75             | 267              | 287               | 612             |
| 13198           | Ddit3          | 37            | 163             | 275              | 4596           | 37             | 168              | 146               | 4651            |
| 13200           | Ddost          | 150           | 851             | 514              | 2391           | 147            | 897              | 467               | 2306            |

| NCBI<br>Gene ID | Gene<br>Symbol | Affy.<br>CD4+ | Agilent<br>CD4+ | Illumina<br>CD4+ | Nimbl.<br>CD4+ | Affy.<br>CD19+ | Agilent<br>CD19+ | Illumina<br>CD19+ | Nimbl.<br>CD19+ |
|-----------------|----------------|---------------|-----------------|------------------|----------------|----------------|------------------|-------------------|-----------------|
| 13202           | Ddt            | 43            | 678             | 199              | 1582           | 49             | 802              | 190               | 1551            |
| 13204           | Dhx15          | 667           | 1557            | 2230             | 13649          | 613            | 1108             | 1842              | 11666           |
| 13205           | Ddx3x          | 548           | 1350            | 787              | 5838           | 610            | 1095             | 941               | 5412            |
| 13206           | Ddx4           | 4             | 2               | 30               | 74             | 5              | 4                | 32                | 77              |
| 13207           | Ddx5           | 2256          | 11330           | 110              | 19911          | 2375           | 12169            | 123               | 15240           |
| 13209           | Ddx6           | 1102          | 206             | 877              | 24070          | 1185           | 125              | 1020              | 17284           |
| 13211           | Dhx9           | 286           | 1816            | 195              | 96             | 342            | 1673             | 172               | 79              |
| 13214           | Defb1          | 4             | 3               | 25               | 36             | 5              | 3                | 29                | 34              |
| 13215           | Defb2          | 6             | 3               | 20               | 68             | 6              | 3                | 20                | 87              |
| 13218           | Defcr-rs1      | 16            | 16              | 28               | 30             | 15             | 13               | 29                | 25              |
| 13237           | Defcr3         | 7             | 1130            | 32               | 26             | 7              | 1383             | 34                | 29              |
| 13340           | Slc29a2        | 20            | 27              | 35               | 69             | 25             | 33               | 40                | 74              |
| 13345           | Twist2         | 12            | 2               | 26               | 51             | 14             | 3                | 21                | 49              |
| 13346           | Des            | 8             | 6               | 31               | 33             | 9              | 3                | 30                | 28              |
| 13347           | Dffa           | 61            | 184             | 207              | 1712           | 79             | 223              | 223               | 1770            |
| 13350           | Dgat1          | 52            | 112             | 229              | 1236           | 55             | 85               | 202               | 943             |
| 13353           | Dgcr6          | 33            | 202             | 51               | 96             | 31             | 256              | 58                | 120             |
| 13356           | Dgcr2          | 185           | 551             | 539              | 1248           | 155            | 445              | 401               | 1079            |
| 13358           | Slc25a1        | 62            | 124             | 61               | 271            | 67             | 131              | 62                | 311             |
| 13360           | Dhcr7          | 47            | 701             | 91               | 40             | 34             | 426              | 64                | 36              |
| 13361           | Dhfr           | 9             | 22              | 41               | 93             | 10             | 28               | 56                | 145             |
| 13363           | Dhh            | 10            | 2               | 24               | 26             | 8              | 3                | 24                | 24              |
| 13367           | Diap1          | 160           | 1413            | 91               | 1065           | 143            | 1058             | 73                | 943             |
| 13368           | Dffb           | 39            | 89              | 21               | 780            | 43             | 92               | 23                | 653             |
| 13370           | Dio1           | 6             | 14              | 39               | 29             | 6              | 14               | 33                | 25              |
| 13371           | Dio2           | 6             | 13              | 24               | 46             | 6              | 12               | 29                | 36              |
| 13380           | Dkk1           | 11            | 4               | 31               | 16             | 12             | 3                | 30                | 25              |
| 13382           | Dld            | 90            | 383             | 446              | 1393           | 110            | 385              | 479               | 1546            |
| 13384           | Mpp3           | 8             | 3               | 32               | 41             | 9              | 4                | 33                | 53              |
| 13386           | Dlk1           | 20            | 9               | 44               | 63             | 20             | 5                | 61                | 42              |
| 13388           | Dll1           | 6             | 13              | 36               | 32             | 7              | 39               | 39                | 69              |
| 13389           | Dll3           | 8             | 5               | 25               | 101            | 8              | 9                | 22                | 132             |
| 13390           | Dlx1           | 6             | 2               | 38               | 233            | 6              | 3                | 37                | 208             |
| 13392           | Dlx2           | 8             | 3               | 47               | 166            | 9              | 3                | 38                | 114             |
| 13393           | Dlx3           | 21            | 2               | 28               | 42             | 17             | 3                | 34                | 48              |
| 13394           | Dlx4           | 17            | 2               | 35               | 128            | 19             | 3                | 38                | 151             |
| 13395           | Dlx5           | 12            | 11              | 39               | 85             | 11             | 9                | 38                | 261             |
| 13401           | Dmwd           | 10            | 7               | 33               | 20             | 11             | 48               | 101               | 116             |
| 13405           | Dmd            | 5             | 5               | 21               | 38             | 5              | 8                | 34                | 68              |
| 13406           | Dmp1           | 5             | 3               | 27               | 30             | 5              | 7                | 25                | 29              |
| 13409           | Tmc1           | 5             | 111             | 25               | 28             | 5              | 124              | 25                | 36              |
| 13417           | Dnahc8         | 200           | 446             | 280              | 850            | 37             | 58               | 61                | 121             |
| 13418           | Dnajc1         | 64            | 513             | 223              | 4155           | 36             | 288              | 129               | 2670            |
| 13419           | Dnase1         | 9             | 14              | 24               | 42             | 8              | 15               | 26                | 51              |
| 13421           | Dnase1l3       | 6             | 11              | 20               | 112            | 23             | 75               | 173               | 7639            |
| 13430           | Dnm2           | 364           | 823             | 502              | 2251           | 210            | 518              | 347               | 1383            |
| 13433           | Dnmt1          | 189           | 841             | 637              | 1119           | 142            | 692              | 458               | 705             |
| 13435           | Dnmt3a         | 98            | 330             | 27               | 5150           | 74             | 138              | 32                | 2287            |
| 13436           | Dnmt3b         | 23            | 57              | 319              | 349            | 23             | 46               | 296               | 359             |
| 13437           | Dnpep          | 38            | 1338            | 29               | 1520           | 48             | 1998             | 31                | 2220            |
| 13445           | Cdk2ap1        | 108           | 423             | 3364             | 4507           | 162            | 497              | 3957              | 4850            |

| NCBI<br>Gene ID | Gene<br>Symbol | Affy.<br>CD4+ | Agilent<br>CD4+ | Illumina<br>CD4+ | Nimbl.<br>CD4+ | Affy.<br>CD19+ | Agilent<br>CD19+ | Illumina<br>CD19+ | Nimbl.<br>CD19+ |
|-----------------|----------------|---------------|-----------------|------------------|----------------|----------------|------------------|-------------------|-----------------|
| 13446           | Doc2a          | 10            | 56              | 19               | 53             | 8              | 45               | 21                | 62              |
| 13447           | Doc2b          | 6             | 3               | 32               | 16             | 5              | 3                | 23                | 17              |
| 13448           | Dok1           | 35            | 138             | 49               | 190            | 68             | 314              | 75                | 482             |
| 13449           | Dok2           | 77            | 3898            | 823              | 151            | 20             | 152              | 61                | 33              |
| 13478           | Dpagt1         | 24            | 226             | 348              | 1115           | 37             | 343              | 469               | 1305            |
| 13479           | Dpep1          | 6             | 12              | 24               | 121            | 5              | 14               | 25                | 121             |
| 13480           | Dpm1           | 145           | 493             | 64               | 7748           | 155            | 609              | 61                | 8324            |
| 13481           | Dpm2           | 62            | 788             | 1465             | 1177           | 57             | 829              | 1701              | 1231            |
| 13482           | Dpp4           | 146           | 430             | 683              | 5443           | 246            | 686              | 1134              | 7796            |
| 13483           | Dpp6           | 6             | 43              | 42               | 71             | 7              | 35               | 46                | 83              |
| 13486           | Dr1            | 214           | 301             | 20               | 952            | 169            | 206              | 22                | 707             |
| 13487           | Slc26a3        | 4             | 40              | 28               | 38             | 4              | 47               | 33                | 27              |
| 13488           | Drd1a          | 10            | 2               | 35               | 24             | 10             | 4                | 35                | 23              |
| 13489           | Drd2           | 6             | 19              | 28               | 147            | 6              | 31               | 24                | 119             |
| 13490           | Drd3           | 8             | 34              | 24               | 76             | 8              | 28               | 23                | 79              |
| 13491           | Drd4           | 30            | 10              | 21               | 62             | 27             | 7                | 25                | 56              |
| 13492           | Drd5           | 5             | 30              | 29               | 22             | 6              | 24               | 37                | 30              |
| 13494           | Drg1           | 111           | 405             | 662              | 2181           | 105            | 297              | 574               | 1474            |
| 13495           | Drg2           | 34            | 168             | 345              | 1191           | 31             | 174              | 313               | 963             |
| 13496           | Arid3a         | 39            | 66              | 111              | 612            | 67             | 255              | 268               | 2005            |
| 13497           | Drp2           | 6             | 2               | 26               | 22             | 6              | 8                | 27                | 26              |
| 13505           | Dsc1           | 5             | 2               | 32               | 46             | 4              | 3                | 28                | 58              |
| 13506           | Dsc2           | 5             | 6               | 18               | 19             | 5              | 7                | 20                | 24              |
| 13507           | Dsc3           | 5             | 5               | 18               | 47             | 5              | 3                | 20                | 39              |
| 13508           | Dscam          | 6             | 5               | 27               | 28             | 7              | 4                | 25                | 23              |
| 13511           | Dsg2           | 5             | 11              | 30               | 48             | 5              | 13               | 29                | 47              |
| 13512           | Dsg3           | 5             | 7               | 109              | 21             | 5              | 9                | 105               | 25              |
| 13518           | Dst            | 10            | 24              | 38               | 199            | 8              | 24               | 30                | 53              |
| 13521           | Slc26a2        | 41            | 24              | 29               | 170            | 33             | 15               | 30                | 111             |
| 13522           | Adam28         | 6             | 39              | 29               | 108            | 6              | 42               | 41                | 497             |
| 13524           | Adam18         | 5             | 10              | 22               | 18             | 5              | 6                | 18                | 21              |
| 13526           | Adam24         | 5             | 6               | 29               | 18             | 5              | 5                | 21                | 21              |
| 13527           | Dtna           | 6             | 6               | 29               | 25             | 6              | 8                | 36                | 98              |
| 13528           | Dtnb           | 102           | 347             | 776              | 498            | 67             | 252              | 501               | 288             |
| 13531           | Dub1           | 4             | 9               | 26               | 26             | 4              | 9                | 31                | 23              |
| 13532           | Dub2           | 9             | 3               | 32               | 35             | 8              | 3                | 32                | 37              |
| 13537           | Dusp2          | 204           | 8028            | 1153             | 3523           | 220            | 9639             | 1278              | 4700            |
| 13542           | Dvl1           | 84            | 501             | 477              | 1046           | 85             | 532              | 384               | 1145            |
| 13543           | Dvl2           | 67            | 89              | 24               | 89             | 62             | 79               | 23                | 86              |
| 13544           | Dvl3           | 62            | 43              | 34               | 44             | 67             | 42               | 33                | 36              |
| 13548           | Dyrk1a         | 379           | 303             | 170              | 234            | 368            | 238              | 185               | 219             |
| 13549           | Dyrk1b         | 41            | 230             | 31               | 60             | 50             | 212              | 29                | 48              |
| 13555           | E2f1           | 12            | 15              | 55               | 334            | 15             | 41               | 95                | 1091            |
| 13557           | E2f3           | 14            | 72              | 68               | 606            | 20             | 208              | 125               | 1094            |
| 13559           | E2f5           | 14            | 145             | 20               | 586            | 17             | 193              | 23                | 742             |
| 13560           | E4f1           | 116           | 1485            | 535              | 734            | 90             | 1098             | 340               | 661             |
| 13586           | Ear1           | 4             | 3               | 27               | 23             | 4              | 3                | 37                | 58              |
| 13589           | Mapre1         | 138           | 1302            | 1996             | 7094           | 117            | 1007             | 1880              | 5273            |
| 13591           | Ebf1           | 6             | 2               | 48               | 58             | 609            | 306              | 1009              | 8447            |
| 13592           | Ebf2           | 6             | 11              | 20               | 30             | 6              | 17               | 26                | 46              |
| 13593           | Ebf3           | 8             | 5               | 22               | 145            | 9              | 6                | 20                | 182             |

| NCBI<br>Gene ID | Gene<br>Symbol | Affy.<br>CD4+ | Agilent<br>CD4+ | Illumina<br>CD4+ | Nimbl.<br>CD4+ | Affy.<br>CD19+ | Agilent<br>CD19+ | Illumina<br>CD19+ | Nimbl.<br>CD19+ |
|-----------------|----------------|---------------|-----------------|------------------|----------------|----------------|------------------|-------------------|-----------------|
| 13595           | Ebp            | 45            | 2885            | 433              | 3787           | 41             | 2874             | 374               | 2792            |
| 13599           | Ecel1          | 20            | 81              | 25               | 20             | 18             | 95               | 23                | 22              |
| 13601           | Ecm1           | 116           | 1404            | 670              | 650            | 26             | 201              | 116               | 212             |
| 13602           | Sparcl1        | 6             | 19              | 39               | 26             | 5              | 14               | 40                | 30              |
| 13603           | Opn3           | 14            | 3               | 26               | 57             | 35             | 21               | 41                | 1621            |
| 13605           | Ect2           | 12            | 32              | 30               | 26             | 15             | 49               | 27                | 27              |
| 13607           | Eda            | 10            | 2               | 36               | 29             | 9              | 3                | 35                | 49              |
| 13608           | Edar           | 10            | 5               | 33               | 42             | 11             | 6                | 34                | 58              |
| 13609           | Edg1           | 1497          | 1540            | 20               | 18100          | 844            | 630              | 21                | 10523           |
| 13610           | Edg3           | 8             | 51              | 27               | 33             | 47             | 247              | 31                | 6128            |
| 13611           | Edg6           | 353           | 315             | 208              | 284            | 271            | 273              | 156               | 264             |
| 13612           | Edil3          | 5             | 4               | 45               | 184            | 4              | 7                | 51                | 124             |
| 13614           | Edn1           | 6             | 2               | 24               | 17             | 5              | 3                | 23                | 20              |
| 13615           | Edn2           | 11            | 3               | 22               | 41             | 9              | 7                | 19                | 51              |
| 13616           | Edn3           | 16            | 7               | 37               | 21             | 14             | 8                | 34                | 21              |
| 13617           | Ednra          | 7             | 5               | 24               | 24             | 9              | 6                | 27                | 26              |
| 13618           | Ednrb          | 6             | 22              | 26               | 36             | 5              | 29               | 28                | 32              |
| 13619           | Phc1           | 46            | 177             | 763              | 1131           | 50             | 145              | 698               | 1151            |
| 13626           | Eed            | 116           | 253             | 933              | 4129           | 117            | 286              | 964               | 3265            |
| 13627           | Eef1a1         | 8854          | 59244           | 17351            | 42024          | 8411           | 44358            | 18030             | 32017           |
| 13628           | Eef1a2         | 15            | 4               | 28               | 56             | 13             | 4                | 29                | 66              |
| 13629           | Eef2           | 2108          | 4148            | 4368             | 11453          | 1939           | 3721             | 3241              | 9132            |
| 13631           | Eef2k          | 17            | 13              | 40               | 343            | 27             | 31               | 44                | 626             |
| 13636           | Efna1          | 7             | 8               | 27               | 44             | 7              | 5                | 27                | 46              |
| 13637           | Efna2          | 11            | 2               | 22               | 65             | 12             | 3                | 26                | 85              |
| 13638           | Efna3          | 6             | 2               | 54               | 52             | 6              | 3                | 51                | 62              |
| 13639           | Efna4          | 18            | 34              | 39               | 79             | 18             | 42               | 30                | 58              |
| 13640           | Efna5          | 7             | 26              | 28               | 21             | 6              | 23               | 36                | 20              |
| 13641           | Efnb1          | 21            | 54              | 72               | 86             | 19             | 66               | 62                | 106             |
| 13642           | Efnb2          | 9             | 6               | 20               | 140            | 9              | 7                | 20                | 103             |
| 13643           | Efnb3          | 21            | 33              | 31               | 79             | 19             | 14               | 22                | 32              |
| 13644           | Efs            | 15            | 26              | 35               | 39             | 14             | 24               | 34                | 33              |
| 13645           | Egf            | 10            | 25              | 111              | 121            | 10             | 33               | 98                | 109             |
| 13649           | Egfr           | 7             | 26              | 31               | 26             | 7              | 18               | 28                | 31              |
| 13650           | Rhbdf1         | 15            | 7               | 39               | 21             | 28             | 50               | 400               | 330             |
| 13653           | Egr1           | 71            | 1154            | 1863             | 8906           | 48             | 469              | 1002              | 5537            |
| 13654           | Egr2           | 35            | 388             | 202              | 149            | 29             | 230              | 121               | 86              |
| 13655           | Egr3           | 63            | 102             | 942              | 91             | 168            | 263              | 2755              | 62              |
| 13656           | Egr4           | 20            | 3               | 22               | 40             | 23             | 3                | 35                | 42              |
| 13660           | Ehd1           | 30            | 199             | 36               | 96             | 151            | 3059             | 176               | 562             |
| 13661           | Ehf            | 5             | 24              | 25               | 20             | 5              | 24               | 25                | 24              |
| 13663           | Ei24           | 63            | 479             | 191              | 1691           | 72             | 553              | 201               | 1749            |
| 13664           | Eif1a          | 61            | 146             | 458              | 3471           | 83             | 184              | 606               | 3704            |
| 13665           | Eif2s1         | 265           | 685             | 30               | 1523           | 275            | 644              | 28                | 1169            |
| 13666           | Eif2ak3        | 58            | 172             | 142              | 672            | 176            | 474              | 280               | 1461            |
| 13667           | Eif2b4         | 33            | 1198            | 740              | 1755           | 31             | 1219             | 722               | 1529            |
| 13669           | Eif3s10        | 480           | 1661            | 529              | 7860           | 518            | 1445             | 557               | 7144            |
| 13681           | Eif4a1         | 922           | 5961            | 821              | 3013           | 839            | 5388             | 578               | 1602            |
| 13682           | Eif4a2         | 914           | 3931            | 901              | 8595           | 963            | 4353             | 1046              | 7783            |
| 13684           | Eif4e          | 122           | 426             | 91               | 3843           | 135            | 403              | 95                | 4686            |
| 13685           | Eif4ebp1       | 27            | 144             | 234              | 423            | 37             | 574              | 785               | 1545            |

| NCBI<br>Gene ID | Gene<br>Symbol | Affy.<br>CD4+ | Agilent<br>CD4+ | Illumina<br>CD4+ | Nimbl.<br>CD4+ | Affy.<br>CD19+ | Agilent<br>CD19+ | Illumina<br>CD19+ | Nimbl.<br>CD19+ |
|-----------------|----------------|---------------|-----------------|------------------|----------------|----------------|------------------|-------------------|-----------------|
| 13688           | Eif4ebp2       | 254           | 428             | 913              | 198            | 173            | 150              | 471               | 140             |
| 13690           | Eif4g2         | 891           | 1665            | 116              | 21042          | 788            | 1393             | 105               | 18979           |
| 13709           | Elf1           | 287           | 796             | 1810             | 7906           | 276            | 553              | 1509              | 7319            |
| 13710           | Elf3           | 6             | 3               | 28               | 62             | 7              | 2                | 28                | 62              |
| 13711           | Elf5           | 7             | 5               | 31               | 61             | 7              | 4                | 32                | 38              |
| 13712           | Elk1           | 74            | 2               | 42               | 86             | 75             | 3                | 41                | 68              |
| 13713           | Elk3           | 120           | 540             | 467              | 946            | 130            | 657              | 543               | 756             |
| 13714           | Elk4           | 313           | 18              | 31               | 223            | 281            | 12               | 28                | 210             |
| 13716           | Ell            | 53            | 670             | 525              | 1413           | 48             | 452              | 445               | 1009            |
| 13717           | Eln            | 16            | 36              | 29               | 70             | 17             | 33               | 28                | 63              |
| 13722           | Scye1          | 63            | 1866            | 646              | 1544           | 77             | 2182             | 707               | 1546            |
| 13723           | Emb            | 351           | 1631            | 1765             | 12073          | 10             | 60               | 85                | 521             |
| 13726           | Emd            | 88            | 753             | 161              | 2348           | 97             | 728              | 169               | 2506            |
| 13728           | Mark2          | 300           | 1586            | 4082             | 239            | 206            | 722              | 2504              | 169             |
| 13730           | Emp1           | 8             | 7               | 36               | 139            | 7              | 3                | 27                | 86              |
| 13731           | Emp2           | 6             | 3               | 23               | 30             | 7              | 3                | 25                | 35              |
| 13732           | Emp3           | 243           | 1535            | 5735             | 23328          | 177            | 1302             | 3766              | 19994           |
| 13733           | Emr1           | 6             | 10              | 29               | 59             | 9              | 109              | 134               | 220             |
| 13796           | Emx1           | 23            | 23              | 27               | 91             | 24             | 29               | 24                | 110             |
| 13797           | Emx2           | 5             | 16              | 23               | 59             | 5              | 18               | 28                | 45              |
| 13798           | En1            | 8             | 3               | 31               | 76             | 8              | 4                | 29                | 68              |
| 13799           | En2            | 5             | 45              | 25               | 39             | 5              | 34               | 23                | 35              |
| 13800           | Enah           | 5             | 30              | 281              | 85             | 6              | 36               | 269               | 20              |
| 13801           | Enam           | 4             | 2               | 23               | 24             | 4              | 3                | 27                | 33              |
| 13803           | Enc1           | 118           | 837             | 406              | 9095           | 31             | 101              | 61                | 698             |
| 13804           | Endog          | 17            | 235             | 172              | 282            | 14             | 144              | 106               | 270             |
| 13805           | Eng            | 12            | 10              | 34               | 134            | 10             | 5                | 32                | 215             |
| 13806           | Eno1           | 703           | 96              | 1174             | 7555           | 512            | 49               | 652               | 5395            |
| 13807           | Eno2           | 7             | 11              | 41               | 70             | 7              | 6                | 33                | 43              |
| 13808           | Eno3           | 28            | 538             | 171              | 2145           | 30             | 643              | 139               | 1656            |
| 13809           | Enpep          | 6             | 2               | 22               | 44             | 6              | 3                | 22                | 51              |
| 13813           | Eomes          | 19            | 36              | 64               | 419            | 9              | 5                | 27                | 34              |
| 13819           | Epas1          | 25            | 8               | 18               | 172            | 12             | 106              | 19                | 148             |
| 13821           | Epb4.111       | 18            | 48              | 75               | 67             | 10             | 44               | 32                | 60              |
| 13822           | Epb4.112       | 78            | 1315            | 492              | 1515           | 126            | 1704             | 804               | 2196            |
| 13823           | Epb4.113       | 5             | 3               | 26               | 37             | 5              | 3                | 34                | 85              |
| 13824           | Epb4.114a      | 5             | 31              | 32               | 141            | 4              | 19               | 28                | 84              |
| 13828           | Epb4.2         | 5             | 5               | 20               | 44             | 5              | 4                | 21                | 46              |
| 13829           | Epb4.9         | 14            | 13              | 24               | 79             | 18             | 12               | 29                | 66              |
| 13831           | Epc1           | 300           | 924             | 879              | 11644          | 269            | 716              | 757               | 8383            |
| 13835           | Epha1          | 8             | 15              | 29               | 43             | 8              | 17               | 33                | 24              |
| 13836           | Epha2          | 7             | 6               | 20               | 115            | 8              | 30               | 26                | 135             |
| 13837           | Epha3          | 5             | 18              | 36               | 24             | 5              | 18               | 32                | 38              |
| 13838           | Epha4          | 5             | 7               | 33               | 53             | 5              | 12               | 29                | 76              |
| 13839           | Epha5          | 5             | 14              | 26               | 52             | 6              | 21               | 32                | 55              |
| 13840           | Epha6          | 5             | 10              | 26               | 30             | 4              | 5                | 30                | 27              |
| 13841           | Epha7          | 6             | 4               | 31               | 42             | 6              | 4                | 31                | 56              |
| 13842           | Epha8          | 11            | 7               | 30               | 41             | 11             | 7                | 34                | 53              |
| 13844           | Ephb2          | 9             | 16              | 29               | 106            | 9              | 3                | 29                | 148             |
| 13845           | Ephb3          | 6             | 14              | 28               | 31             | 6              | 20               | 25                | 29              |
| 13846           | Ephb4          | 8             | 63              | 33               | 120            | 7              | 9                | 34                | 140             |

| NCBI<br>Gene ID | Gene<br>Symbol | Affy.<br>CD4+ | Agilent<br>CD4+ | Illumina<br>CD4+ | Nimbl.<br>CD4+ | Affy.<br>CD19+ | Agilent<br>CD19+ | Illumina<br>CD19+ | Nimbl.<br>CD19+ |
|-----------------|----------------|---------------|-----------------|------------------|----------------|----------------|------------------|-------------------|-----------------|
| 13848           | Ephb6          | 54            | 60              | 194              | 159            | 11             | 3                | 34                | 28              |
| 13849           | Ephx1          | 162           | 540             | 811              | 5136           | 280            | 793              | 1391              | 7037            |
| 13850           | Ephx2          | 5             | 27              | 38               | 22             | 5              | 27               | 35                | 28              |
| 13853           | Epm2a          | 5             | 36              | 35               | 69             | 5              | 55               | 32                | 70              |
| 13854           | Epn1           | 120           | 622             | 42               | 75             | 196            | 1279             | 56                | 60              |
| 13855           | Epn2           | 12            | 19              | 34               | 63             | 13             | 44               | 57                | 139             |
| 13856           | Epo            | 5             | 3               | 22               | 25             | 5              | 4                | 17                | 24              |
| 13857           | Epor           | 9             | 13              | 30               | 38             | 8              | 17               | 35                | 30              |
| 13858           | Eps15          | 200           | 901             | 1614             | 14832          | 226            | 745              | 1867              | 13746           |
| 13860           | Eps8           | 10            | 2               | 24               | 26             | 20             | 16               | 28                | 162             |
| 13861           | Epx            | 6             | 4               | 24               | 81             | 7              | 4                | 29                | 52              |
| 13863           | Lcn5           | 8             | 3               | 30               | 30             | 9              | 20               | 31                | 51              |
| 13864           | Nr2f6          | 21            | 67              | 50               | 81             | 24             | 258              | 99                | 98              |
| 13865           | Nr2f1          | 7             | 2               | 47               | 33             | 7              | 3                | 45                | 27              |
| 13866           | ErbB2          | 8             | 15              | 23               | 29             | 8              | 8                | 25                | 49              |
| 13867           | ErbB3          | 10            | 71              | 29               | 44             | 8              | 54               | 27                | 38              |
| 13869           | ErbB4          | 7             | 503             | 28               | 25             | 7              | 1440             | 28                | 27              |
| 13870           | Ercc1          | 59            | 388             | 485              | 1245           | 61             | 370              | 466               | 1165            |
| 13871           | Ercc2          | 84            | 4               | 179              | 340            | 81             | 5                | 169               | 201             |
| 13872           | Ercc3          | 104           | 374             | 199              | 2879           | 101            | 279              | 163               | 1885            |
| 13874           | Ereg           | 4             | 20              | 29               | 42             | 5              | 12               | 29                | 34              |
| 13875           | Erf            | 45            | 242             | 40               | 159            | 30             | 127              | 42                | 90              |
| 13876           | Erg            | 7             | 2               | 26               | 36             | 7              | 3                | 24                | 104             |
| 13877           | Erh            | 120           | 2739            | 1022             | 2916           | 128            | 2898             | 976               | 2727            |
| 13884           | Es1            | 5             | 9               | 30               | 68             | 6              | 5                | 28                | 62              |
| 13885           | Esd            | 78            | 1762            | 2051             | 8667           | 79             | 2002             | 2221              | 8379            |
| 13897           | Es22           | 5             | 6               | 29               | 100            | 5              | 3                | 32                | 126             |
| 13924           | Ptprv          | 13            | 23              | 57               | 145            | 11             | 6                | 37                | 73              |
| 13929           | X83328         | 48            | 353             | 219              | 2212           | 29             | 246              | 146               | 1151            |
| 13972           | Gnb1l          | 84            | 526             | 382              | 588            | 62             | 288              | 207               | 318             |
| 13982           | Esr1           | 13            | 6               | 46               | 19             | 17             | 9                | 46                | 20              |
| 13984           | Esx1           | 6             | 2               | 45               | 29             | 6              | 3                | 41                | 29              |
| 13990           | Smarcad1       | 76            | 85              | 170              | 2006           | 86             | 68               | 195               | 1996            |
| 13992           | Khdrbs3        | 9             | 29              | 27               | 76             | 8              | 21               | 25                | 33              |
| 13998           | Fgd6           | 14            | 71              | 52               | 260            | 34             | 223              | 124               | 968             |
| 14004           | Chchd2         | 264           | 6873            | 23               | 15992          | 242            | 5645             | 23                | 15836           |
| 14007           | Cugbp2         | 249           | 1261            | 1539             | 2386           | 291            | 1042             | 1628              | 3010            |
| 14009           | Etv1           | 8             | 5               | 36               | 27             | 7              | 5                | 31                | 21              |
| 14011           | Etv6           | 40            | 41              | 57               | 795            | 46             | 42               | 49                | 665             |
| 14013           | Evi1           | 5             | 5               | 35               | 32             | 5              | 4                | 34                | 24              |
| 14017           | Evi2a          | 32            | 153             | 144              | 1800           | 89             | 624              | 505               | 4852            |
| 14020           | Evi5           | 7             | 5               | 36               | 47             | 11             | 41               | 148               | 351             |
| 14025           | Bcl11a         | 14            | 2               | 23               | 89             | 659            | 2424             | 3113              | 7759            |
| 14026           | Evl            | 685           | 9257            | 1034             | 3780           | 410            | 5008             | 508               | 1890            |
| 14027           | Evpl           | 17            | 44              | 36               | 60             | 14             | 30               | 31                | 60              |
| 14028           | Evx1           | 8             | 7               | 25               | 70             | 7              | 5                | 26                | 72              |
| 14029           | Evx2           | 16            | 56              | 27               | 70             | 15             | 63               | 21                | 63              |
| 14038           | Expi           | 7             | 3               | 22               | 14             | 7              | 13               | 27                | 22              |
| 14042           | Ext1           | 79            | 101             | 394              | 426            | 24             | 24               | 78                | 106             |
| 14043           | Ext2           | 100           | 998             | 71               | 185            | 82             | 672              | 49                | 133             |
| 14048           | Eya1           | 8             | 2               | 26               | 25             | 20             | 50               | 49                | 88              |



| NCBI<br>Gene ID | Gene<br>Symbol | Affy.<br>CD4+ | Agilent<br>CD4+ | Illumina<br>CD4+ | Nimbl.<br>CD4+ | Affy.<br>CD19+ | Agilent<br>CD19+ | Illumina<br>CD19+ | Nimbl.<br>CD19+ |
|-----------------|----------------|---------------|-----------------|------------------|----------------|----------------|------------------|-------------------|-----------------|
| 14049           | Eya2           | 33            | 41              | 27               | 437            | 11             | 3                | 27                | 66              |
| 14050           | Eya3           | 132           | 183             | 505              | 626            | 100            | 165              | 424               | 650             |
| 14051           | Eya4           | 6             | 6               | 26               | 21             | 6              | 5                | 29                | 29              |
| 14055           | Ezh1           | 184           | 95              | 52               | 1158           | 173            | 91               | 44                | 1509            |
| 14056           | Ezh2           | 77            | 162             | 101              | 223            | 79             | 185              | 98                | 194             |
| 14057           | Sfxn1          | 104           | 693             | 1499             | 3172           | 108            | 823              | 1408              | 2766            |
| 14058           | F10            | 10            | 2               | 27               | 69             | 9              | 3                | 24                | 63              |
| 14060           | F13b           | 5             | 5               | 24               | 18             | 5              | 6                | 21                | 19              |
| 14061           | F2             | 8             | 7               | 74               | 59             | 8              | 3                | 69                | 38              |
| 14062           | F2r            | 25            | 188             | 504              | 408            | 10             | 7                | 25                | 22              |
| 14063           | F2r1           | 37            | 37              | 1034             | 214            | 8              | 3                | 52                | 47              |
| 14064           | F2r2           | 10            | 13              | 33               | 228            | 7              | 11               | 24                | 48              |
| 14065           | F2r3           | 14            | 10              | 108              | 62             | 11             | 12               | 32                | 36              |
| 14066           | F3             | 6             | 2               | 27               | 50             | 7              | 5                | 23                | 56              |
| 14067           | F5             | 6             | 2               | 29               | 29             | 6              | 3                | 31                | 28              |
| 14068           | F7             | 8             | 27              | 31               | 25             | 8              | 28               | 30                | 29              |
| 14069           | F8             | 5             | 3               | 29               | 61             | 6              | 3                | 30                | 77              |
| 14071           | F9             | 4             | 50              | 21               | 21             | 5              | 34               | 95                | 90              |
| 14073           | Faah           | 158           | 233             | 2419             | 1263           | 39             | 33               | 406               | 217             |
| 14077           | Fabp3          | 7             | 27              | 24               | 52             | 8              | 78               | 33                | 59              |
| 14079           | Fabp2          | 4             | 37              | 30               | 34             | 4              | 29               | 27                | 36              |
| 14080           | Fabp1          | 4             | 3               | 24               | 23             | 4              | 3                | 18                | 23              |
| 14081           | Acsl1          | 23            | 95              | 38               | 563            | 46             | 205              | 47                | 1245            |
| 14082           | Fadd           | 28            | 131             | 322              | 601            | 28             | 118              | 292               | 591             |
| 14083           | Ptk2           | 16            | 43              | 155              | 245            | 13             | 28               | 112               | 160             |
| 14084           | Faf1           | 62            | 323             | 1540             | 312            | 65             | 333              | 1586              | 271             |
| 14085           | Fah            | 12            | 21              | 144              | 209            | 15             | 40               | 259               | 441             |
| 14086           | Fscn1          | 14            | 12              | 26               | 75             | 13             | 13               | 25                | 63              |
| 14087           | Fanca          | 20            | 30              | 24               | 182            | 43             | 607              | 39                | 798             |
| 14088           | Fancc          | 35            | 107             | 57               | 286            | 26             | 112              | 55                | 318             |
| 14089           | Fap            | 5             | 7               | 29               | 77             | 4              | 3                | 18                | 47              |
| 14104           | Fasn           | 156           | 2706            | 1295             | 204            | 109            | 1481             | 840               | 184             |
| 14105           | Fusip1         | 341           | 223             | 89               | 1236           | 473            | 239              | 95                | 970             |
| 14106           | Foxh1          | 10            | 715             | 23               | 33             | 10             | 788              | 20                | 31              |
| 14109           | Fau            | 703           | 126155          | 14294            | 23404          | 821            | 169379           | 14289             | 28119           |
| 14113           | Fbl            | 117           | 8091            | 2068             | 23807          | 133            | 7938             | 1810              | 17788           |
| 14114           | Fbln1          | 16            | 51              | 43               | 150            | 15             | 22               | 26                | 85              |
| 14115           | Fbln2          | 13            | 23              | 32               | 44             | 11             | 24               | 31                | 63              |
| 14118           | Fbn1           | 6             | 5               | 29               | 35             | 6              | 3                | 29                | 29              |
| 14119           | Fbn2           | 7             | 11              | 43               | 29             | 9              | 9                | 40                | 38              |
| 14120           | Fbp2           | 7             | 2               | 38               | 35             | 7              | 3                | 33                | 31              |
| 14121           | Fbp1           | 5             | 10              | 40               | 20             | 5              | 15               | 38                | 18              |
| 14125           | Fcer1a         | 4             | 38              | 28               | 18             | 4              | 26               | 28                | 19              |
| 14126           | Ms4a2          | 4             | 14              | 28               | 93             | 4              | 13               | 28                | 92              |
| 14127           | Fcer1g         | 6             | 87              | 30               | 95             | 7              | 105              | 88                | 268             |
| 14129           | Fcgr1          | 9             | 3               | 28               | 31             | 10             | 6                | 32                | 35              |
| 14130           | Fcgr2b         | 9             | 7               | 27               | 105            | 145            | 1472             | 893               | 9449            |
| 14131           | Fcgr3          | 11            | 17              | 48               | 406            | 12             | 276              | 30                | 193             |
| 14132           | Fcgrt          | 47            | 59              | 326              | 394            | 87             | 232              | 1320              | 1138            |
| 14133           | Fcna           | 13            | 7               | 22               | 32             | 13             | 18               | 35                | 320             |
| 14134           | Fcnb           | 8             | 3               | 57               | 37             | 8              | 7                | 32                | 41              |

| NCBI<br>Gene ID | Gene<br>Symbol | Affy.<br>CD4+ | Agilent<br>CD4+ | Illumina<br>CD4+ | Nimbl.<br>CD4+ | Affy.<br>CD19+ | Agilent<br>CD19+ | Illumina<br>CD19+ | Nimbl.<br>CD19+ |
|-----------------|----------------|---------------|-----------------|------------------|----------------|----------------|------------------|-------------------|-----------------|
| 14137           | Fdft1          | 74            | 212             | 23               | 65             | 50             | 122              | 16                | 73              |
| 14148           | Fdx1           | 22            | 498             | 22               | 2255           | 18             | 421              | 25                | 1951            |
| 14149           | Fdxr           | 30            | 696             | 90               | 260            | 27             | 616              | 77                | 284             |
| 14151           | Fech           | 15            | 149             | 63               | 515            | 13             | 113              | 50                | 348             |
| 14154           | Fem1a          | 114           | 903             | 27               | 882            | 101            | 806              | 30                | 1097            |
| 14155           | Fem1b          | 131           | 589             | 361              | 2615           | 148            | 605              | 358               | 2524            |
| 14156           | Fen1           | 16            | 130             | 288              | 516            | 19             | 281              | 487               | 827             |
| 14158           | Fert2          | 6             | 3               | 20               | 41             | 7              | 5                | 24                | 84              |
| 14159           | Fes            | 21            | 22              | 31               | 82             | 28             | 424              | 227               | 455             |
| 14161           | Fga            | 7             | 7               | 30               | 29             | 7              | 6                | 32                | 25              |
| 14163           | Fgd1           | 11            | 10              | 20               | 85             | 12             | 10               | 28                | 69              |
| 14164           | Fgf1           | 6             | 7               | 21               | 50             | 6              | 7                | 26                | 43              |
| 14165           | Fgf10          | 5             | 4               | 28               | 23             | 5              | 3                | 26                | 24              |
| 14166           | Fgf11          | 9             | 52              | 24               | 26             | 9              | 55               | 23                | 24              |
| 14167           | Fgf12          | 5             | 2               | 29               | 65             | 5              | 3                | 30                | 82              |
| 14168           | Fgf13          | 33            | 75              | 380              | 522            | 12             | 19               | 85                | 88              |
| 14169           | Fgf14          | 5             | 32              | 25               | 34             | 6              | 16               | 26                | 40              |
| 14170           | Fgf15          | 11            | 6               | 24               | 25             | 14             | 5                | 29                | 30              |
| 14171           | Fgf17          | 14            | 7               | 27               | 49             | 15             | 7                | 28                | 55              |
| 14172           | Fgf18          | 17            | 23              | 37               | 112            | 16             | 23               | 40                | 140             |
| 14173           | Fgf2           | 5             | 6               | 34               | 64             | 5              | 3                | 35                | 66              |
| 14174           | Fgf3           | 12            | 2               | 28               | 54             | 15             | 3                | 28                | 58              |
| 14176           | Fgf5           | 9             | 4               | 25               | 18             | 9              | 3                | 20                | 20              |
| 14177           | Fgf6           | 6             | 6               | 26               | 16             | 6              | 7                | 25                | 16              |
| 14178           | Fgf7           | 5             | 3               | 19               | 30             | 5              | 4                | 21                | 25              |
| 14179           | Fgf8           | 31            | 41              | 28               | 82             | 31             | 40               | 22                | 101             |
| 14180           | Fgf9           | 18            | 9               | 29               | 58             | 16             | 12               | 28                | 63              |
| 14181           | Fgfbp1         | 6             | 10              | 26               | 24             | 6              | 8                | 25                | 29              |
| 14182           | Fgfr1          | 11            | 20              | 24               | 22             | 11             | 22               | 23                | 33              |
| 14183           | Fgfr2          | 5             | 9               | 43               | 36             | 5              | 4                | 39                | 57              |
| 14184           | Fgfr3          | 16            | 44              | 32               | 725            | 14             | 47               | 35                | 767             |
| 14186           | Fgfr4          | 8             | 84              | 26               | 54             | 7              | 71               | 26                | 48              |
| 14187           | Akr1b8         | 5             | 16              | 24               | 37             | 5              | 22               | 22                | 43              |
| 14190           | Fgl2           | 6             | 5               | 27               | 85             | 7              | 4                | 32                | 88              |
| 14191           | Fgr            | 9             | 9               | 27               | 50             | 38             | 168              | 56                | 529             |
| 14194           | Fh1            | 75            | 558             | 219              | 1678           | 192            | 1510             | 487               | 3341            |
| 14198           | Fhit           | 19            | 23              | 62               | 49             | 20             | 35               | 85                | 120             |
| 14199           | Fhl1           | 7             | 6               | 27               | 19             | 7              | 9                | 27                | 43              |
| 14200           | Fhl2           | 9             | 32              | 41               | 48             | 7              | 5                | 29                | 34              |
| 14201           | Fhl3           | 47            | 118             | 27               | 34             | 31             | 89               | 31                | 95              |
| 14202           | Fhl4           | 6             | 3               | 24               | 33             | 6              | 3                | 23                | 67              |
| 14204           | Il4i1          | 12            | 25              | 35               | 106            | 128            | 2913             | 3080              | 2620            |
| 14205           | Figf           | 6             | 7               | 32               | 68             | 6              | 5                | 31                | 98              |
| 14208           | Ppm1g          | 122           | 929             | 288              | 8603           | 104            | 571              | 193               | 6840            |
| 14219           | Ctgf           | 29            | 9               | 26               | 21             | 26             | 8                | 24                | 22              |
| 14221           | Fjx1           | 5             | 3               | 27               | 43             | 5              | 5                | 22                | 40              |
| 14225           | Fkbp1a         | 114           | 195             | 1507             | 3649           | 55             | 68               | 477               | 1707            |
| 14226           | Fkbp1b         | 7             | 4               | 25               | 42             | 7              | 3                | 27                | 19              |
| 14227           | Fkbp2          | 50            | 178             | 109              | 2365           | 102            | 534              | 214               | 5616            |
| 14228           | Fkbp4          | 155           | 522             | 1671             | 10244          | 153            | 633              | 1473              | 10229           |
| 14229           | Fkbp5          | 86            | 121             | 294              | 733            | 59             | 80               | 179               | 548             |

| NCBI<br>Gene ID | Gene<br>Symbol | Affy.<br>CD4+ | Agilent<br>CD4+ | Illumina<br>CD4+ | Nimbl.<br>CD4+ | Affy.<br>CD19+ | Agilent<br>CD19+ | Illumina<br>CD19+ | Nimbl.<br>CD19+ |
|-----------------|----------------|---------------|-----------------|------------------|----------------|----------------|------------------|-------------------|-----------------|
| 14230           | Fkbp10         | 9             | 6               | 26               | 200            | 8              | 4                | 22                | 206             |
| 14231           | Fkbp7          | 8             | 25              | 35               | 239            | 9              | 24               | 44                | 229             |
| 14232           | Fkbp8          | 205           | 156             | 907              | 314            | 202            | 163              | 711               | 187             |
| 14233           | Foxi1          | 11            | 3               | 22               | 18             | 9              | 3                | 28                | 20              |
| 14234           | Foxc2          | 7             | 4               | 25               | 33             | 7              | 4                | 22                | 39              |
| 14235           | Foxm1          | 11            | 17              | 26               | 58             | 14             | 29               | 36                | 82              |
| 14236           | Foxn2          | 132           | 436             | 126              | 822            | 67             | 260              | 66                | 258             |
| 14237           | Foxd4          | 8             | 2               | 32               | 65             | 8              | 3                | 32                | 71              |
| 14238           | Foxf2          | 6             | 2               | 28               | 29             | 6              | 3                | 26                | 24              |
| 14239           | Fkhl18         | 9             | 35              | 27               | 38             | 8              | 32               | 28                | 43              |
| 14240           | Foxb2          | 30            | 5               | 29               | 83             | 28             | 5                | 27                | 109             |
| 14241           | Foxl1          | 7             | 5               | 32               | 41             | 7              | 3                | 29                | 47              |
| 14245           | Lpin1          | 62            | 252             | 159              | 999            | 24             | 78               | 66                | 164             |
| 14247           | Fli1           | 283           | 1922            | 677              | 389            | 463            | 3594             | 1211              | 537             |
| 14251           | Flot1          | 29            | 440             | 672              | 145            | 22             | 248              | 400               | 72              |
| 14252           | Flot2          | 61            | 229             | 443              | 1673           | 21             | 52               | 143               | 526             |
| 14254           | Flt1           | 10            | 19              | 31               | 63             | 10             | 17               | 30                | 60              |
| 14255           | Flt3           | 7             | 10              | 29               | 46             | 8              | 18               | 33                | 276             |
| 14256           | Flt3l          | 204           | 272             | 126              | 7389           | 80             | 113              | 59                | 3304            |
| 14257           | Flt4           | 7             | 6               | 133              | 68             | 7              | 6                | 127               | 74              |
| 14261           | Fmo1           | 8             | 5               | 28               | 30             | 8              | 4                | 26                | 33              |
| 14262           | Fmo3           | 5             | 4               | 29               | 17             | 5              | 6                | 28                | 18              |
| 14263           | Fmo5           | 24            | 30              | 53               | 54             | 25             | 27               | 48                | 51              |
| 14264           | Fmod           | 7             | 25              | 17               | 31             | 7              | 29               | 17                | 58              |
| 14265           | Fmr1           | 100           | 219             | 258              | 5993           | 103            | 189              | 278               | 5351            |
| 14268           | Fn1            | 6             | 4               | 26               | 34             | 6              | 6                | 29                | 49              |
| 14269           | Fnbp1          | 279           | 265             | 3067             | 7418           | 250            | 187              | 3067              | 5582            |
| 14270           | Srgap2         | 87            | 453             | 24               | 980            | 47             | 150              | 30                | 633             |
| 14272           | Fnta           | 96            | 126             | 1033             | 11888          | 97             | 107              | 1060              | 10996           |
| 14275           | Folr1          | 13            | 59              | 27               | 121            | 14             | 54               | 32                | 83              |
| 14281           | Fos            | 175           | 1004            | 2267             | 8958           | 169            | 774              | 2206              | 7808            |
| 14282           | Fosb           | 179           | 105             | 136              | 102            | 673            | 229              | 546               | 279             |
| 14283           | Fosl1          | 9             | 11              | 23               | 61             | 10             | 11               | 25                | 51              |
| 14284           | Fosl2          | 30            | 18              | 76               | 1692           | 24             | 3                | 20                | 136             |
| 14287           | Fpgs           | 27            | 690             | 64               | 167            | 28             | 818              | 61                | 128             |
| 14293           | Fpr1           | 5             | 8               | 22               | 21             | 5              | 9                | 19                | 34              |
| 14294           | Fpr-rs2        | 5             | 5               | 29               | 37             | 5              | 8                | 31                | 60              |
| 14296           | Frat1          | 143           | 414             | 52               | 994            | 83             | 344              | 38                | 777             |
| 14299           | Freq           | 6             | 14              | 29               | 27             | 6              | 16               | 35                | 18              |
| 14300           | Frg1           | 147           | 245             | 36               | 402            | 128            | 203              | 27                | 356             |
| 14302           | Frk            | 6             | 6               | 36               | 60             | 5              | 8                | 34                | 44              |
| 14308           | Fshb           | 6             | 44              | 27               | 29             | 6              | 31               | 25                | 29              |
| 14309           | Fshr           | 6             | 12              | 22               | 23             | 7              | 22               | 26                | 21              |
| 14311           | Cidec          | 8             | 13              | 31               | 21             | 7              | 14               | 30                | 22              |
| 14312           | Brd2           | 215           | 4686            | 1453             | 1026           | 246            | 6324             | 1315              | 1102            |
| 14313           | Fst            | 8             | 2               | 38               | 30             | 8              | 3                | 36                | 25              |
| 14314           | Fstl1          | 7             | 2               | 26               | 37             | 8              | 6                | 30                | 89              |
| 14317           | Ftcd           | 14            | 12              | 31               | 22             | 14             | 17               | 33                | 29              |
| 14319           | Fth1           | 1039          | 15349           | 2956             | 34591          | 1390           | 22481            | 3354              | 34473           |
| 14343           | Fut1           | 5             | 4               | 27               | 143            | 5              | 5                | 25                | 159             |
| 14344           | Fut2           | 13            | 16              | 34               | 44             | 11             | 9                | 33                | 56              |

| NCBI<br>Gene ID | Gene<br>Symbol | Affy.<br>CD4+ | Agilent<br>CD4+ | Illumina<br>CD4+ | Nimbl.<br>CD4+ | Affy.<br>CD19+ | Agilent<br>CD19+ | Illumina<br>CD19+ | Nimbl.<br>CD19+ |
|-----------------|----------------|---------------|-----------------|------------------|----------------|----------------|------------------|-------------------|-----------------|
| 14345           | Fut4           | 6             | 3               | 22               | 31             | 7              | 4                | 29                | 34              |
| 14347           | Fut7           | 9             | 34              | 32               | 36             | 8              | 12               | 28                | 21              |
| 14348           | Fut9           | 5             | 6               | 31               | 19             | 5              | 3                | 30                | 20              |
| 14349           | Fv1            | 85            | 29              | 2568             | 209            | 61             | 28               | 2145              | 255             |
| 14356           | Fxc1           | 11            | 2111            | 463              | 1005           | 10             | 2075             | 453               | 1150            |
| 14357           | Dtx1           | 364           | 4138            | 1053             | 6362           | 327            | 4038             | 975               | 7282            |
| 14359           | Fxr1h          | 162           | 1039            | 132              | 3467           | 171            | 1192             | 139               | 3093            |
| 14360           | Fyn            | 543           | 332             | 243              | 17169          | 104            | 47               | 56                | 3423            |
| 14362           | Fzd1           | 11            | 2               | 22               | 18             | 11             | 3                | 21                | 22              |
| 14365           | Fzd3           | 5             | 3               | 33               | 29             | 5              | 3                | 28                | 21              |
| 14366           | Fzd4           | 6             | 11              | 24               | 26             | 6              | 3                | 27                | 33              |
| 14367           | Fzd5           | 19            | 12              | 38               | 52             | 22             | 15               | 40                | 66              |
| 14368           | Fzd6           | 10            | 6               | 27               | 24             | 11             | 10               | 36                | 71              |
| 14369           | Fzd7           | 7             | 4               | 29               | 42             | 7              | 6                | 28                | 35              |
| 14370           | Fzd8           | 9             | 11              | 30               | 53             | 9              | 14               | 28                | 62              |
| 14373           | G0s2           | 19            | 44              | 92               | 363            | 17             | 7                | 31                | 72              |
| 14376           | Ganab          | 280           | 1012            | 487              | 967            | 310            | 908              | 472               | 719             |
| 14377           | G6pc           | 6             | 47              | 36               | 15             | 5              | 52               | 38                | 17              |
| 14378           | G6pc2          | 5             | 2               | 26               | 27             | 5              | 4                | 30                | 24              |
| 14380           | G6pd2          | 24            | 3               | 25               | 82             | 27             | 3                | 29                | 46              |
| 14381           | G6pdx          | 97            | 464             | 125              | 1083           | 104            | 533              | 122               | 1222            |
| 14385           | Slc37a4        | 31            | 309             | 87               | 232            | 38             | 421              | 135               | 323             |
| 14387           | Gaa            | 28            | 204             | 199              | 184            | 36             | 276              | 228               | 202             |
| 14388           | Gab1           | 7             | 3               | 24               | 20             | 7              | 3                | 27                | 21              |
| 14389           | Gab2           | 8             | 5               | 29               | 29             | 9              | 8                | 32                | 51              |
| 14390           | Gabpa          | 140           | 225             | 113              | 1178           | 149            | 185              | 112               | 1116            |
| 14391           | Gabpb1         | 92            | 128             | 107              | 909            | 86             | 89               | 129               | 1040            |
| 14394           | Gabra1         | 5             | 8               | 22               | 20             | 6              | 14               | 23                | 18              |
| 14395           | Gabra2         | 5             | 6               | 37               | 21             | 6              | 3                | 32                | 24              |
| 14396           | Gabra3         | 6             | 9               | 32               | 18             | 6              | 10               | 36                | 19              |
| 14397           | Gabra4         | 5             | 2               | 23               | 35             | 5              | 4                | 24                | 33              |
| 14399           | Gabra6         | 5             | 4               | 19               | 18             | 4              | 4                | 21                | 18              |
| 14400           | Gabrb1         | 4             | 2               | 27               | 31             | 4              | 3                | 29                | 33              |
| 14401           | Gabrb2         | 6             | 6               | 27               | 18             | 6              | 8                | 25                | 24              |
| 14402           | Gabrb3         | 7             | 3               | 26               | 19             | 7              | 3                | 27                | 15              |
| 14403           | Gabrd          | 9             | 13              | 24               | 47             | 8              | 11               | 24                | 39              |
| 14405           | Gabrg1         | 4             | 2               | 31               | 65             | 4              | 4                | 29                | 80              |
| 14406           | Gabrg2         | 5             | 4               | 32               | 24             | 5              | 3                | 37                | 33              |
| 14407           | Gabrg3         | 6             | 14              | 26               | 21             | 6              | 7                | 28                | 22              |
| 14408           | Gabrr1         | 5             | 60              | 25               | 44             | 5              | 59               | 31                | 55              |
| 14409           | Gabrr2         | 26            | 7               | 35               | 744            | 15             | 6                | 26                | 37              |
| 14411           | Slc6a12        | 11            | 20              | 23               | 65             | 11             | 16               | 20                | 44              |
| 14412           | Slc6a13        | 7             | 8               | 27               | 21             | 6              | 25               | 35                | 26              |
| 14415           | Gad1           | 14            | 4               | 20               | 34             | 21             | 32               | 196               | 126             |
| 14417           | Gad2           | 6             | 2               | 24               | 59             | 5              | 3                | 24                | 68              |
| 14419           | Gal            | 6             | 76              | 35               | 48             | 7              | 86               | 30                | 52              |
| 14420           | Galc           | 11            | 10              | 31               | 156            | 7              | 6                | 29                | 71              |
| 14423           | Galnt1         | 100           | 68              | 233              | 810            | 128            | 69               | 327               | 798             |
| 14425           | Galnt3         | 8             | 3               | 30               | 26             | 8              | 7                | 26                | 45              |
| 14426           | Galnt4         | 45            | 137             | 29               | 650            | 49             | 119              | 33                | 549             |
| 14427           | Galr1          | 5             | 16              | 22               | 45             | 6              | 13               | 25                | 45              |

| NCBI<br>Gene ID | Gene<br>Symbol | Affy.<br>CD4+ | Agilent<br>CD4+ | Illumina<br>CD4+ | Nimbl.<br>CD4+ | Affy.<br>CD19+ | Agilent<br>CD19+ | Illumina<br>CD19+ | Nimbl.<br>CD19+ |
|-----------------|----------------|---------------|-----------------|------------------|----------------|----------------|------------------|-------------------|-----------------|
| 14428           | Galr2          | 12            | 15              | 28               | 37             | 11             | 13               | 30                | 30              |
| 14429           | Galr3          | 32            | 217             | 28               | 165            | 27             | 175              | 26                | 141             |
| 14430           | Galt           | 91            | 1074            | 686              | 408            | 85             | 1046             | 711               | 446             |
| 14431           | Gamt           | 10            | 174             | 26               | 78             | 9              | 112              | 56                | 262             |
| 14432           | Gap43          | 10            | 3               | 20               | 36             | 11             | 3                | 23                | 31              |
| 14450           | Gart           | 165           | 230             | 458              | 3317           | 139            | 137              | 337               | 3096            |
| 14451           | Gas1           | 10            | 2               | 20               | 24             | 9              | 3                | 24                | 23              |
| 14453           | Gas2           | 11            | 2               | 34               | 77             | 10             | 3                | 33                | 73              |
| 14455           | Gas5           | 988           | 4738            | 4572             | 11377          | 1123           | 5386             | 4128              | 11513           |
| 14456           | Gas6           | 8             | 17              | 20               | 43             | 7              | 12               | 23                | 39              |
| 14457           | Gas7           | 9             | 6               | 24               | 72             | 10             | 8                | 22                | 44              |
| 14459           | Gast           | 12            | 30              | 27               | 45             | 12             | 31               | 31                | 33              |
| 14460           | Gata1          | 15            | 58              | 49               | 230            | 9              | 20               | 42                | 182             |
| 14461           | Gata2          | 12            | 4               | 22               | 85             | 13             | 3                | 26                | 99              |
| 14462           | Gata3          | 249           | 1462            | 629              | 3992           | 10             | 58               | 30                | 48              |
| 14463           | Gata4          | 13            | 42              | 80               | 24             | 13             | 46               | 67                | 21              |
| 14464           | Gata5          | 9             | 3               | 31               | 24             | 9              | 3                | 35                | 26              |
| 14465           | Gata6          | 8             | 8               | 26               | 37             | 8              | 6                | 24                | 98              |
| 14466           | Gba            | 93            | 181             | 23               | 2847           | 117            | 244              | 27                | 2466            |
| 14467           | Gbas           | 81            | 479             | 113              | 14118          | 64             | 353              | 79                | 10267           |
| 14468           | Gbp1           | 6             | 7               | 34               | 94             | 6              | 3                | 33                | 27              |
| 14469           | Gbp2           | 86            | 685             | 35               | 4331           | 41             | 283              | 30                | 1614            |
| 14470           | Rabac1         | 246           | 10584           | 2094             | 17658          | 174            | 8387             | 1239              | 11712           |
| 14472           | Gbx2           | 12            | 3               | 45               | 39             | 10             | 3                | 42                | 46              |
| 14473           | Gc             | 5             | 12              | 25               | 25             | 5              | 9                | 21                | 35              |
| 14479           | Usp15          | 175           | 433             | 51               | 2662           | 179            | 416              | 58                | 2254            |
| 14489           | Mtpn           | 262           | 867             | 235              | 15032          | 500            | 1290             | 501               | 19476           |
| 14525           | Gcet2          | 9             | 22              | 30               | 19             | 8              | 22               | 31                | 27              |
| 14526           | Gcg            | 6             | 7               | 25               | 28             | 6              | 7                | 25                | 30              |
| 14527           | Gcgr           | 9             | 19              | 30               | 96             | 9              | 22               | 27                | 165             |
| 14528           | Gch1           | 12            | 38              | 256              | 301            | 18             | 100              | 538               | 681             |
| 14531           | Gcm1           | 10            | 3               | 33               | 15             | 9              | 3                | 33                | 16              |
| 14533           | Bloc1s1        | 103           | 2037            | 801              | 275            | 112            | 2846             | 873               | 383             |
| 14534           | Gcn5l2         | 96            | 160             | 242              | 461            | 82             | 175              | 219               | 443             |
| 14536           | Nr6a1          | 16            | 22              | 66               | 62             | 16             | 30               | 47                | 55              |
| 14537           | Gcnt1          | 7             | 4               | 46               | 55             | 44             | 462              | 665               | 701             |
| 14538           | Gcnt2          | 7             | 3               | 46               | 98             | 8              | 3                | 41                | 104             |
| 14539           | Opn1mw         | 6             | 3               | 27               | 31             | 6              | 3                | 32                | 35              |
| 14544           | Gda            | 6             | 2               | 33               | 30             | 5              | 3                | 31                | 24              |
| 14545           | Gdap1          | 4             | 2               | 23               | 23             | 5              | 3                | 24                | 18              |
| 14546           | Gdap10         | 36            | 362             | 84               | 750            | 41             | 404              | 99                | 799             |
| 14547           | Gdap2          | 97            | 62              | 19               | 1779           | 107            | 66               | 21                | 2110            |
| 14548           | Mrps33         | 38            | 2741            | 1820             | 10256          | 36             | 2737             | 1840              | 9211            |
| 14555           | Gpd1           | 14            | 25              | 65               | 104            | 15             | 16               | 48                | 187             |
| 14559           | Gdf1           | 14            | 35              | 29               | 35             | 15             | 25               | 25                | 28              |
| 14560           | Gdf10          | 15            | 2               | 27               | 35             | 15             | 3                | 31                | 59              |
| 14561           | Gdf11          | 67            | 6               | 23               | 16             | 154            | 13               | 27                | 24              |
| 14562           | Gdf3           | 13            | 2               | 32               | 32             | 12             | 3                | 36                | 30              |
| 14563           | Gdf5           | 9             | 37              | 31               | 38             | 11             | 30               | 32                | 43              |
| 14566           | Gdf9           | 7             | 6               | 36               | 79             | 6              | 9                | 29                | 75              |
| 14567           | Gdi1           | 293           | 197             | 1447             | 600            | 380            | 172              | 1640              | 583             |

| NCBI<br>Gene ID | Gene<br>Symbol | Affy.<br>CD4+ | Agilent<br>CD4+ | Illumina<br>CD4+ | Nimbl.<br>CD4+ | Affy.<br>CD19+ | Agilent<br>CD19+ | Illumina<br>CD19+ | Nimbl.<br>CD19+ |
|-----------------|----------------|---------------|-----------------|------------------|----------------|----------------|------------------|-------------------|-----------------|
| 14569           | Gdi2           | 237           | 3142            | 21               | 9334           | 375            | 4523             | 22                | 9604            |
| 14570           | Arhgdig        | 7             | 7               | 26               | 49             | 7              | 12               | 29                | 53              |
| 14571           | Gpd2           | 92            | 278             | 314              | 812            | 135            | 431              | 424               | 982             |
| 14573           | Gdnf           | 16            | 14              | 23               | 41             | 14             | 10               | 25                | 42              |
| 14579           | Gem            | 7             | 13              | 23               | 497            | 93             | 119              | 28                | 4956            |
| 14580           | Gfap           | 6             | 11              | 27               | 58             | 6              | 8                | 26                | 60              |
| 14581           | Gfi1           | 35            | 151             | 97               | 173            | 25             | 96               | 59                | 133             |
| 14582           | Gfi1b          | 24            | 5               | 28               | 23             | 29             | 11               | 29                | 23              |
| 14583           | Gfpt1          | 71            | 14              | 57               | 131            | 65             | 21               | 55                | 136             |
| 14584           | Gfpt2          | 6             | 21              | 36               | 30             | 6              | 28               | 28                | 32              |
| 14585           | Gfra1          | 14            | 6               | 25               | 39             | 13             | 7                | 31                | 40              |
| 14586           | Gfra2          | 6             | 3               | 32               | 35             | 6              | 3                | 27                | 47              |
| 14587           | Gfra3          | 9             | 57              | 31               | 62             | 8              | 54               | 28                | 70              |
| 14588           | Gfra4          | 9             | 18              | 25               | 82             | 9              | 17               | 24                | 64              |
| 14590           | Ggh            | 18            | 141             | 16               | 280            | 16             | 94               | 18                | 218             |
| 14593           | Ggps1          | 119           | 190             | 50               | 4215           | 108            | 174              | 46                | 2505            |
| 14594           | Ggta1          | 20            | 123             | 114              | 710            | 87             | 448              | 369               | 2719            |
| 14595           | B4galt1        | 353           | 2259            | 416              | 362            | 191            | 1040             | 207               | 140             |
| 14598           | Ggt1           | 19            | 22              | 62               | 124            | 11             | 5                | 20                | 29              |
| 14599           | Gh             | 13            | 9               | 28               | 62             | 18             | 25               | 94                | 321             |
| 14600           | Ghr            | 6             | 6               | 30               | 58             | 6              | 3                | 29                | 28              |
| 14601           | Ghrh           | 9             | 35              | 27               | 428            | 10             | 59               | 23                | 374             |
| 14602           | Ghrhr          | 22            | 18              | 29               | 115            | 21             | 18               | 28                | 93              |
| 14603           | Gif            | 7             | 3               | 25               | 33             | 6              | 3                | 28                | 52              |
| 14607           | Gip            | 12            | 12              | 36               | 64             | 12             | 5                | 42                | 62              |
| 14608           | Gpr83          | 48            | 989             | 1016             | 320            | 11             | 31               | 27                | 60              |
| 14609           | Gja1           | 6             | 5               | 25               | 55             | 5              | 3                | 26                | 30              |
| 14610           | Gja10          | 6             | 17              | 27               | 21             | 6              | 19               | 26                | 21              |
| 14611           | Gja3           | 21            | 4               | 19               | 75             | 23             | 6                | 22                | 79              |
| 14612           | Gja4           | 7             | 34              | 26               | 107            | 6              | 31               | 28                | 90              |
| 14613           | Gja5           | 6             | 60              | 28               | 40             | 6              | 47               | 32                | 68              |
| 14615           | Gja7           | 5             | 3               | 28               | 18             | 4              | 3                | 30                | 26              |
| 14616           | Gja8           | 10            | 2               | 23               | 50             | 10             | 2                | 23                | 56              |
| 14617           | Gja9           | 6             | 3               | 32               | 32             | 6              | 3                | 37                | 35              |
| 14618           | Gjb1           | 7             | 8               | 32               | 29             | 7              | 9                | 33                | 34              |
| 14619           | Gjb2           | 6             | 4               | 23               | 82             | 6              | 3                | 27                | 110             |
| 14620           | Gjb3           | 6             | 2               | 22               | 39             | 5              | 3                | 21                | 22              |
| 14621           | Gjb4           | 10            | 5               | 25               | 68             | 9              | 7                | 23                | 68              |
| 14622           | Gjb5           | 7             | 2               | 22               | 40             | 7              | 4                | 25                | 26              |
| 14623           | Gjb6           | 6             | 8               | 28               | 24             | 6              | 6                | 35                | 23              |
| 14626           | Gk2            | 4             | 4               | 45               | 28             | 5              | 7                | 44                | 30              |
| 14628           | Ostm1          | 80            | 748             | 737              | 999            | 63             | 677              | 594               | 708             |
| 14629           | Gclc           | 86            | 267             | 31               | 175            | 71             | 158              | 28                | 100             |
| 14630           | Gclm           | 43            | 15              | 201              | 1059           | 26             | 3                | 117               | 441             |
| 14633           | Gli2           | 10            | 7               | 31               | 50             | 11             | 24               | 35                | 49              |
| 14634           | Gli3           | 5             | 4               | 33               | 78             | 5              | 4                | 31                | 100             |
| 14635           | Galk1          | 40            | 353             | 171              | 1695           | 39             | 380              | 206               | 2751            |
| 14645           | Glul           | 74            | 604             | 44               | 1049           | 82             | 548              | 49                | 746             |
| 14651           | Hagh           | 62            | 209             | 229              | 3610           | 58             | 246              | 183               | 3812            |
| 14652           | Glp1r          | 8             | 6               | 28               | 42             | 9              | 10               | 27                | 64              |
| 14654           | Glra1          | 5             | 4               | 32               | 25             | 5              | 5                | 28                | 24              |

| NCBI<br>Gene ID | Gene<br>Symbol | Affy.<br>CD4+ | Agilent<br>CD4+ | Illumina<br>CD4+ | Nimbl.<br>CD4+ | Affy.<br>CD19+ | Agilent<br>CD19+ | Illumina<br>CD19+ | Nimbl.<br>CD19+ |
|-----------------|----------------|---------------|-----------------|------------------|----------------|----------------|------------------|-------------------|-----------------|
| 14657           | Glra4          | 6             | 2               | 36               | 64             | 6              | 3                | 35                | 72              |
| 14658           | Glrb           | 5             | 3               | 26               | 16             | 5              | 3                | 28                | 18              |
| 14659           | Glrp1          | 6             | 3               | 41               | 43             | 5              | 6                | 36                | 51              |
| 14660           | Gls            | 166           | 332             | 41               | 365            | 154            | 294              | 41                | 104             |
| 14661           | Glud1          | 258           | 3829            | 1047             | 8791           | 242            | 2955             | 837               | 7558            |
| 14663           | Glycam1        | 6             | 2               | 30               | 30             | 6              | 3                | 29                | 28              |
| 14664           | Slc6a9         | 9             | 63              | 33               | 29             | 9              | 54               | 33                | 25              |
| 14667           | Gm2a           | 194           | 558             | 1272             | 1049           | 365            | 1779             | 2375              | 1602            |
| 14670           | Gna-rs1        | 53            | 365             | 1306             | 455            | 42             | 363              | 689               | 251             |
| 14672           | Gna11          | 52            | 237             | 193              | 534            | 50             | 177              | 150               | 332             |
| 14673           | Gna12          | 54            | 405             | 21               | 31             | 65             | 519              | 25                | 31              |
| 14674           | Gna13          | 220           | 1969            | 564              | 9407           | 230            | 1487             | 531               | 6080            |
| 14675           | Gna14          | 6             | 2               | 26               | 56             | 6              | 3                | 27                | 24              |
| 14676           | Gna15          | 10            | 82              | 52               | 46             | 21             | 80               | 79                | 99              |
| 14677           | Gnai1          | 6             | 298             | 27               | 30             | 6              | 305              | 26                | 32              |
| 14678           | Gnai2          | 784           | 1750            | 3848             | 13192          | 869            | 1362             | 3892              | 12032           |
| 14679           | Gnai3          | 293           | 2004            | 16               | 10165          | 224            | 1396             | 22                | 6513            |
| 14680           | Gnal           | 7             | 22              | 44               | 85             | 6              | 6                | 37                | 55              |
| 14682           | Gnaq           | 22            | 36              | 163              | 332            | 85             | 281              | 374               | 1490            |
| 14683           | Gnas           | 72            | 636             | 213              | 5869           | 101            | 1044             | 292               | 7474            |
| 14685           | Gnat1          | 6             | 12              | 25               | 22             | 6              | 15               | 22                | 19              |
| 14686           | Gnat2          | 6             | 9               | 34               | 36             | 6              | 12               | 32                | 22              |
| 14687           | Gnaz           | 10            | 5               | 38               | 90             | 10             | 6                | 43                | 65              |
| 14688           | Gnb1           | 625           | 1535            | 776              | 4752           | 562            | 1186             | 659               | 3311            |
| 14693           | Gnb2           | 215           | 1598            | 979              | 1806           | 284            | 3000             | 1123              | 2409            |
| 14695           | Gnb3           | 12            | 26              | 22               | 29             | 11             | 31               | 18                | 31              |
| 14696           | Gnb4           | 16            | 25              | 61               | 280            | 8              | 3                | 27                | 89              |
| 14697           | Gnb5           | 9             | 59              | 41               | 433            | 8              | 41               | 27                | 109             |
| 14699           | Gngt1          | 4             | 2               | 21               | 82             | 4              | 3                | 22                | 223             |
| 14700           | Gng10          | 86            | 224             | 678              | 8977           | 160            | 704              | 1856              | 17238           |
| 14701           | Gng12          | 59            | 47              | 103              | 1213           | 41             | 25               | 67                | 782             |
| 14702           | Gng2           | 46            | 350             | 281              | 604            | 108            | 1382             | 1022              | 2178            |
| 14704           | Gng3           | 7             | 26              | 21               | 48             | 6              | 26               | 17                | 36              |
| 14705           | Bscl2          | 52            | 107             | 1511             | 1997           | 52             | 86               | 1347              | 1558            |
| 14706           | Gng4           | 18            | 3               | 23               | 20             | 18             | 4                | 24                | 25              |
| 14707           | Gng5           | 78            | 7435            | 211              | 2077           | 73             | 5578             | 169               | 1968            |
| 14708           | Gng7           | 13            | 7               | 32               | 30             | 14             | 5                | 30                | 68              |
| 14709           | Gng8           | 5             | 7               | 45               | 112            | 5              | 6                | 40                | 130             |
| 14710           | Gngt2          | 33            | 15              | 158              | 446            | 75             | 65               | 478               | 1303            |
| 14711           | Gnmt           | 13            | 78              | 53               | 224            | 12             | 83               | 70                | 305             |
| 14712           | Gnpat          | 140           | 1050            | 245              | 890            | 172            | 1248             | 300               | 1096            |
| 14714           | Gnrh1          | 27            | 39              | 57               | 1171           | 26             | 34               | 59                | 1233            |
| 14715           | Gnrhr          | 5             | 4               | 24               | 63             | 5              | 7                | 25                | 53              |
| 14718           | Got1           | 73            | 348             | 146              | 2450           | 81             | 453              | 141               | 2428            |
| 14719           | Got2           | 127           | 763             | 1406             | 4942           | 139            | 764              | 1608              | 6598            |
| 14723           | Gp1ba          | 7             | 5               | 28               | 59             | 8              | 3                | 28                | 80              |
| 14725           | Lrp2           | 6             | 18              | 28               | 57             | 6              | 20               | 27                | 58              |
| 14728           | Lilrb4         | 6             | 3               | 24               | 36             | 7              | 4                | 27                | 144             |
| 14729           | Gp5            | 11            | 7               | 28               | 35             | 11             | 6                | 24                | 30              |
| 14731           | Gpaa1          | 59            | 62              | 121              | 373            | 45             | 37               | 73                | 218             |
| 14732           | Gpam           | 27            | 3               | 28               | 31             | 44             | 3                | 28                | 28              |

| NCBI<br>Gene ID | Gene<br>Symbol | Affy.<br>CD4+ | Agilent<br>CD4+ | Illumina<br>CD4+ | Nimbl.<br>CD4+ | Affy.<br>CD19+ | Agilent<br>CD19+ | Illumina<br>CD19+ | Nimbl.<br>CD19+ |
|-----------------|----------------|---------------|-----------------|------------------|----------------|----------------|------------------|-------------------|-----------------|
| 14733           | Gpc1           | 15            | 140             | 172              | 129            | 13             | 12               | 69                | 74              |
| 14734           | Gpc3           | 5             | 2               | 27               | 35             | 6              | 3                | 30                | 38              |
| 14735           | Gpc4           | 5             | 2               | 29               | 24             | 5              | 3                | 29                | 33              |
| 14738           | Gpr12          | 5             | 5               | 32               | 24             | 5              | 10               | 28                | 40              |
| 14739           | Edg5           | 37            | 18              | 215              | 117            | 27             | 14               | 77                | 56              |
| 14744           | Gpr65          | 54            | 511             | 551              | 638            | 36             | 318              | 386               | 249             |
| 14745           | Edg2           | 9             | 3               | 30               | 75             | 8              | 6                | 34                | 82              |
| 14747           | Cmklr1         | 8             | 102             | 31               | 30             | 7              | 66               | 31                | 32              |
| 14748           | Gpr3           | 14            | 2               | 37               | 148            | 12             | 3                | 38                | 103             |
| 14751           | Gpi1           | 510           | 6428            | 1861             | 14697          | 531            | 6416             | 1807              | 13979           |
| 14755           | Pigq           | 87            | 289             | 249              | 409            | 100            | 278              | 277               | 366             |
| 14756           | Gpld1          | 7             | 3               | 326              | 166            | 7              | 3                | 286               | 118             |
| 14758           | Gpm6b          | 9             | 23              | 27               | 121            | 9              | 21               | 27                | 95              |
| 14760           | Gpr19          | 15            | 21              | 102              | 745            | 13             | 18               | 97                | 580             |
| 14761           | Gpr27          | 21            | 9               | 24               | 89             | 24             | 8                | 24                | 113             |
| 14762           | Gpr33          | 5             | 2               | 21               | 15             | 6              | 3                | 18                | 18              |
| 14763           | Gpr37          | 6             | 9               | 27               | 23             | 5              | 8                | 27                | 21              |
| 14764           | Gpr44          | 9             | 94              | 24               | 139            | 10             | 91               | 23                | 161             |
| 14765           | Gpr50          | 5             | 34              | 27               | 31             | 5              | 37               | 26                | 33              |
| 14766           | Gpr56          | 12            | 2               | 15               | 87             | 12             | 6                | 20                | 77              |
| 14768           | Lancl1         | 66            | 51              | 214              | 2067           | 56             | 41               | 162               | 1085            |
| 14775           | Gpx1           | 107           | 4209            | 2361             | 7964           | 201            | 8632             | 4056              | 13362           |
| 14776           | Gpx2           | 10            | 174             | 54               | 349            | 6              | 144              | 62                | 221             |
| 14778           | Gpx3           | 6             | 3               | 24               | 57             | 6              | 3                | 27                | 57              |
| 14780           | Gpx5           | 4             | 5               | 27               | 67             | 4              | 4                | 23                | 100             |
| 14782           | Gsr            | 48            | 331             | 181              | 171            | 16             | 43               | 39                | 43              |
| 14783           | Grb10          | 6             | 9               | 38               | 31             | 6              | 6                | 40                | 32              |
| 14784           | Grb2           | 187           | 3377            | 1552             | 6485           | 261            | 6115             | 2409              | 11135           |
| 14786           | Grb7           | 13            | 55              | 67               | 113            | 15             | 81               | 104               | 137             |
| 14787           | Rhpn1          | 17            | 7               | 28               | 168            | 17             | 7                | 32                | 210             |
| 14789           | Leprel2        | 11            | 4               | 40               | 46             | 10             | 10               | 31                | 30              |
| 14790           | Grcc10         | 394           | 16195           | 1754             | 6583           | 438            | 17187            | 1682              | 8198            |
| 14793           | Cdca3          | 17            | 56              | 132              | 136            | 17             | 105              | 230               | 194             |
| 14797           | Aes            | 255           | 1057            | 332              | 265            | 123            | 502              | 138               | 127             |
| 14799           | Gria1          | 6             | 2               | 26               | 22             | 6              | 3                | 32                | 21              |
| 14800           | Gria2          | 4             | 3               | 24               | 25             | 4              | 3                | 30                | 21              |
| 14802           | Gria4          | 5             | 4               | 38               | 41             | 5              | 3                | 36                | 32              |
| 14804           | Grid2          | 5             | 11              | 24               | 30             | 5              | 8                | 27                | 29              |
| 14805           | Grik1          | 5             | 3               | 24               | 43             | 6              | 3                | 24                | 50              |
| 14806           | Grik2          | 5             | 3               | 29               | 30             | 5              | 3                | 28                | 31              |
| 14807           | Grik3          | 8             | 7               | 28               | 90             | 8              | 13               | 25                | 67              |
| 14809           | Grik5          | 21            | 57              | 58               | 110            | 11             | 16               | 52                | 113             |
| 14810           | Grin1          | 7             | 26              | 27               | 104            | 7              | 26               | 29                | 167             |
| 14811           | Grin2a         | 7             | 4               | 36               | 32             | 6              | 3                | 35                | 32              |
| 14812           | Grin2b         | 7             | 17              | 35               | 101            | 7              | 13               | 37                | 77              |
| 14813           | Grin2c         | 12            | 25              | 42               | 109            | 13             | 21               | 35                | 106             |
| 14814           | Grin2d         | 10            | 102             | 23               | 58             | 10             | 81               | 27                | 67              |
| 14815           | Nr3c1          | 152           | 417             | 40               | 1264           | 173            | 508              | 36                | 1338            |
| 14816           | Grm1           | 6             | 4               | 36               | 76             | 6              | 3                | 22                | 118             |
| 14823           | Grm8           | 6             | 2               | 23               | 40             | 6              | 3                | 26                | 47              |
| 14824           | Grn            | 35            | 21536           | 96               | 129            | 187            | 11197            | 556               | 954             |



| NCBI<br>Gene ID | Gene<br>Symbol | Affy.<br>CD4+ | Agilent<br>CD4+ | Illumina<br>CD4+ | Nimbl.<br>CD4+ | Affy.<br>CD19+ | Agilent<br>CD19+ | Illumina<br>CD19+ | Nimbl.<br>CD19+ |
|-----------------|----------------|---------------|-----------------|------------------|----------------|----------------|------------------|-------------------|-----------------|
| 14825           | Cxcl1          | 17            | 4               | 27               | 27             | 17             | 6                | 30                | 22              |
| 14828           | Hspa5          | 479           | 2760            | 101              | 5502           | 635            | 4678             | 116               | 6644            |
| 14829           | Grpr           | 5             | 6               | 22               | 21             | 5              | 3                | 23                | 16              |
| 14836           | Gsc            | 12            | 3               | 29               | 23             | 11             | 3                | 28                | 25              |
| 14840           | Gsg1           | 8             | 103             | 41               | 40             | 9              | 69               | 43                | 43              |
| 14841           | Gsg2           | 6             | 36              | 81               | 140            | 7              | 42               | 101               | 180             |
| 14852           | Gspt1          | 262           | 536             | 2849             | 901            | 236            | 420              | 2478              | 586             |
| 14853           | Gspt2          | 6             | 3               | 36               | 46             | 6              | 3                | 35                | 113             |
| 14854           | Gss            | 25            | 75              | 57               | 1356           | 17             | 69               | 50                | 485             |
| 14857           | Gsta1          | 6             | 3               | 23               | 22             | 7              | 6                | 27                | 21              |
| 14858           | Gsta2          | 9             | 2               | 37               | 35             | 10             | 3                | 39                | 22              |
| 14859           | Gsta3          | 12            | 4               | 38               | 43             | 10             | 2                | 22                | 21              |
| 14860           | Gsta4          | 10            | 5               | 111              | 575            | 6              | 3                | 31                | 124             |
| 14862           | Gstm1          | 6             | 152             | 38               | 51             | 11             | 522              | 87                | 89              |
| 14863           | Gstm2          | 8             | 20              | 38               | 37             | 8              | 16               | 40                | 45              |
| 14864           | Gstm3          | 6             | 73              | 24               | 57             | 6              | 154              | 29                | 92              |
| 14865           | Gstm4          | 13            | 20              | 41               | 91             | 15             | 19               | 51                | 80              |
| 14866           | Gstm5          | 5             | 2               | 28               | 109            | 5              | 3                | 33                | 98              |
| 14867           | Gstm6          | 4             | 25              | 41               | 20             | 4              | 18               | 67                | 26              |
| 14870           | Gstp1          | 277           | 7161            | 2689             | 5001           | 190            | 6534             | 1712              | 4699            |
| 14871           | Gstt1          | 6             | 15              | 27               | 59             | 6              | 16               | 31                | 81              |
| 14872           | Gstt2          | 19            | 211             | 205              | 483            | 16             | 211              | 165               | 405             |
| 14873           | Gsto1          | 15            | 238             | 215              | 2052           | 13             | 236              | 168               | 1396            |
| 14884           | Gtf2h1         | 103           | 352             | 1588             | 9826           | 99             | 289              | 1296              | 10523           |
| 14885           | Gtf2h4         | 19            | 247             | 290              | 1161           | 23             | 432              | 380               | 1276            |
| 14886           | Gtf2i          | 409           | 3293            | 5255             | 3415           | 157            | 688              | 1358              | 917             |
| 14894           | Gtl3           | 52            | 372             | 95               | 5498           | 55             | 280              | 88                | 4679            |
| 14897           | Trip12         | 496           | 2802            | 1489             | 6742           | 405            | 1713             | 1111              | 5398            |
| 14904           | Gtpbp1         | 318           | 443             | 647              | 2877           | 211            | 261              | 375               | 1736            |
| 14912           | Nkx6-2         | 18            | 6               | 41               | 153            | 25             | 8                | 42                | 196             |
| 14913           | Guca1a         | 6             | 2               | 26               | 71             | 7              | 3                | 22                | 38              |
| 14915           | Guca2a         | 20            | 39              | 28               | 184            | 14             | 37               | 27                | 111             |
| 14916           | Guca2b         | 12            | 3               | 23               | 71             | 12             | 24               | 34                | 274             |
| 14917           | Gucy2c         | 7             | 33              | 46               | 43             | 7              | 41               | 39                | 46              |
| 14919           | Gucy2e         | 6             | 4               | 25               | 27             | 7              | 3                | 25                | 29              |
| 14923           | Guk1           | 41            | 316             | 934              | 1991           | 41             | 325              | 825               | 2032            |
| 14924           | Magi1          | 8             | 6               | 44               | 74             | 7              | 5                | 38                | 54              |
| 14933           | Gyk            | 8             | 7               | 35               | 991            | 10             | 14               | 53                | 1904            |
| 14934           | Gypa           | 4             | 4               | 27               | 79             | 5              | 4                | 27                | 91              |
| 14936           | Gys1           | 32            | 12              | 35               | 31             | 49             | 17               | 27                | 28              |
| 14938           | Gzma           | 5             | 3               | 19               | 105            | 5              | 3                | 24                | 80              |
| 14939           | Gzmb           | 4             | 17              | 19               | 158            | 5              | 5                | 18                | 43              |
| 14940           | Gzmc           | 6             | 18              | 27               | 101            | 5              | 3                | 27                | 22              |
| 14941           | Gzmd           | 4             | 7               | 36               | 36             | 4              | 6                | 35                | 60              |
| 14942           | Gzme           | 5             | 7               | 33               | 18             | 5              | 6                | 31                | 21              |
| 14943           | Gzmf           | 6             | 2               | 31               | 110            | 7              | 3                | 29                | 102             |
| 14944           | Gzmg           | 4             | 2               | 18               | 32             | 4              | 3                | 21                | 37              |
| 14945           | Gzmk           | 5             | 2               | 28               | 46             | 5              | 3                | 22                | 21              |
| 14950           | H13            | 251           | 445             | 581              | 1932           | 182            | 330              | 250               | 862             |
| 14955           | H19            | 6             | 69              | 24               | 21             | 6              | 76               | 23                | 26              |
| 14957           | Hist1h1d       | 6             | 38              | 29               | 34             | 7              | 68               | 29                | 55              |

| NCBI<br>Gene ID | Gene<br>Symbol | Affy.<br>CD4+ | Agilent<br>CD4+ | Illumina<br>CD4+ | Nimbl.<br>CD4+ | Affy.<br>CD19+ | Agilent<br>CD19+ | Illumina<br>CD19+ | Nimbl.<br>CD19+ |
|-----------------|----------------|---------------|-----------------|------------------|----------------|----------------|------------------|-------------------|-----------------|
| 14958           | H1f0           | 22            | 71              | 47               | 2604           | 12             | 24               | 25                | 320             |
| 14960           | H2-aa          | 10            | 5               | 20               | 64             | 1986           | 11338            | 429               | 33151           |
| 14961           | H2-ab1         | 18            | 28              | 40               | 57             | 1602           | 67184            | 16171             | 25770           |
| 14963           | H2-bl          | 7             | 1071            | 38               | 290            | 6              | 961              | 29                | 241             |
| 14964           | H2-d1          | 1569          | 24127           | 9142             | 33059          | 1433           | 21043            | 8276              | 24558           |
| 14968           | H2-ea          | 7             | 2               | 29               | 32             | 10             | 3                | 32                | 248             |
| 14969           | H2-eb1         | 24            | 34              | 29               | 89             | 1820           | 23457            | 12199             | 19440           |
| 14972           | H2-k1          | 297           | 76071           | 46               | 21151          | 279            | 67694            | 45                | 18898           |
| 14976           | H2-ke2         | 56            | 549             | 406              | 16481          | 62             | 642              | 391               | 19253           |
| 14977           | Slc39a7        | 92            | 3479            | 160              | 2035           | 71             | 2156             | 100               | 1504            |
| 14979           | H2-ke6         | 77            | 413             | 2123             | 1117           | 82             | 368              | 1872              | 1021            |
| 14985           | H2-m10.1       | 5             | 2               | 27               | 30             | 5              | 3                | 27                | 35              |
| 14991           | H2-m3          | 69            | 720             | 393              | 3280           | 131            | 1552             | 637               | 5176            |
| 14997           | H2-m9          | 6             | 2               | 31               | 22             | 7              | 3                | 34                | 30              |
| 14998           | H2-dma         | 21            | 77              | 135              | 487            | 170            | 1220             | 2471              | 6654            |
| 15000           | H2-dmb2        | 12            | 10              | 31               | 25             | 1779           | 4374             | 5027              | 10791           |
| 15001           | H2-oa          | 11            | 62              | 68               | 66             | 178            | 3773             | 1957              | 2649            |
| 15006           | H2-q1          | 21            | 21737           | 25               | 7758           | 22             | 19669            | 29                | 13758           |
| 15007           | H2-q10         | 11            | 21094           | 24               | 2284           | 8              | 21154            | 23                | 84              |
| 15013           | H2-q2          | 23            | 23562           | 4910             | 70             | 21             | 18803            | 3452              | 75              |
| 15018           | H2-q7          | 1350          | 19735           | 506              | 19258          | 1205           | 14727            | 424               | 13092           |
| 15019           | H2-q8          | 78            | 415             | 277              | 70             | 76             | 433              | 175               | 221             |
| 15024           | H2-t10         | 148           | 2382            | 45               | 4259           | 84             | 1189             | 43                | 2202            |
| 15039           | H2-t22         | 105           | 915             | 86               | 5110           | 76             | 424              | 53                | 2571            |
| 15043           | H2-t3          | 31            | 152             | 29               | 1508           | 12             | 4                | 29                | 31              |
| 15061           | H28            | 5             | 8               | 23               | 20             | 5              | 7                | 18                | 18              |
| 15064           | Mr1            | 35            | 42              | 80               | 379            | 29             | 24               | 61                | 213             |
| 15078           | H3f3a          | 496           | 10508           | 2197             | 31437          | 1234           | 28489            | 5326              | 41122           |
| 15081           | H3f3b          | 917           | 14234           | 1809             | 28521          | 1068           | 18398            | 2818              | 30844           |
| 15109           | Hal            | 11            | 7               | 136              | 32             | 9              | 4                | 111               | 24              |
| 15110           | Hand1          | 19            | 2               | 22               | 25             | 19             | 3                | 26                | 22              |
| 15111           | Hand2          | 12            | 9               | 27               | 79             | 10             | 3                | 23                | 92              |
| 15112           | Hao1           | 4             | 3               | 28               | 18             | 5              | 6                | 32                | 22              |
| 15114           | Hap1           | 7             | 105             | 34               | 55             | 7              | 134              | 41                | 52              |
| 15115           | Hars           | 84            | 386             | 103              | 1610           | 86             | 393              | 88                | 1351            |
| 15116           | Has1           | 5             | 5               | 30               | 41             | 5              | 3                | 32                | 44              |
| 15117           | Has2           | 6             | 12              | 37               | 30             | 6              | 20               | 37                | 35              |
| 15118           | Has3           | 7             | 3               | 25               | 30             | 8              | 3                | 24                | 25              |
| 15122           | Hba-a1         | 34            | 131             | 191              | 1511           | 35             | 160              | 255               | 3232            |
| 15126           | Hba-x          | 9             | 4               | 23               | 72             | 10             | 5                | 27                | 83              |
| 15129           | Hbb-b1         | 25            | 178             | 235              | 749            | 44             | 342              | 507               | 2131            |
| 15132           | Hbb-bh1        | 5             | 5               | 27               | 23             | 5              | 12               | 33                | 25              |
| 15135           | Hbb-y          | 4             | 31              | 30               | 26             | 5              | 33               | 24                | 42              |
| 15139           | Hc             | 6             | 34              | 29               | 23             | 7              | 29               | 27                | 16              |
| 15159           | Hccs           | 90            | 153             | 26               | 833            | 99             | 143              | 27                | 587             |
| 15160           | Serpind1       | 11            | 3               | 26               | 141            | 12             | 3                | 28                | 109             |
| 15161           | Hcfc1          | 190           | 181             | 1119             | 2685           | 208            | 166              | 1076              | 2795            |
| 15162           | Hck            | 13            | 3               | 29               | 30             | 202            | 2171             | 41                | 8308            |
| 15163           | Hcls1          | 272           | 3212            | 661              | 1801           | 401            | 5705             | 744               | 2157            |
| 15165           | Hcn1           | 5             | 2               | 21               | 42             | 5              | 4                | 25                | 58              |
| 15166           | Hcn2           | 10            | 31              | 24               | 100            | 9              | 30               | 28                | 105             |

| NCBI<br>Gene ID | Gene<br>Symbol | Affy.<br>CD4+ | Agilent<br>CD4+ | Illumina<br>CD4+ | Nimbl.<br>CD4+ | Affy.<br>CD19+ | Agilent<br>CD19+ | Illumina<br>CD19+ | Nimbl.<br>CD19+ |
|-----------------|----------------|---------------|-----------------|------------------|----------------|----------------|------------------|-------------------|-----------------|
| 15168           | Hcn3           | 12            | 41              | 40               | 29             | 12             | 24               | 29                | 24              |
| 15171           | Hcrt           | 10            | 47              | 30               | 27             | 10             | 40               | 32                | 33              |
| 15182           | Hdac2          | 166           | 27              | 1009             | 13061          | 118            | 21               | 718               | 7174            |
| 15183           | Hdac3          | 169           | 280             | 906              | 903            | 177            | 267              | 940               | 702             |
| 15184           | Hdac5          | 56            | 504             | 283              | 576            | 63             | 515              | 264               | 725             |
| 15185           | Hdac6          | 42            | 98              | 93               | 305            | 49             | 106              | 107               | 233             |
| 15186           | Hdc            | 12            | 16              | 26               | 117            | 12             | 19               | 26                | 190             |
| 15191           | Hdgf           | 141           | 1514            | 660              | 13144          | 122            | 1437             | 530               | 10733           |
| 15193           | Hdgfrp2        | 96            | 2328            | 1378             | 2018           | 77             | 1834             | 1081              | 1722            |
| 15194           | Hdh            | 132           | 376             | 179              | 161            | 133            | 306              | 155               | 173             |
| 15199           | Hebp1          | 9             | 18              | 23               | 57             | 8              | 31               | 26                | 88              |
| 15201           | Hells          | 19            | 34              | 25               | 393            | 36             | 77               | 25                | 705             |
| 15202           | Hemt1          | 5             | 5               | 52               | 66             | 5              | 9                | 56                | 96              |
| 15203           | Heph           | 5             | 2               | 39               | 34             | 5              | 3                | 42                | 69              |
| 15204           | Herc2          | 162           | 106             | 1377             | 6596           | 141            | 113              | 1013              | 5023            |
| 15205           | Hes1           | 18            | 5               | 32               | 27             | 46             | 52               | 288               | 1716            |
| 15206           | Hes2           | 14            | 79              | 26               | 31             | 11             | 74               | 24                | 31              |
| 15207           | Hes3           | 14            | 14              | 30               | 62             | 14             | 8                | 33                | 61              |
| 15208           | Hes5           | 29            | 15              | 30               | 259            | 35             | 209              | 45                | 1137            |
| 15209           | Hesx1          | 5             | 2               | 35               | 75             | 4              | 3                | 30                | 50              |
| 15211           | Hexa           | 105           | 698             | 324              | 1815           | 156            | 942              | 453               | 2456            |
| 15212           | Hexb           | 89            | 1086            | 37               | 2382           | 229            | 2938             | 58                | 3587            |
| 15213           | Hey1           | 12            | 12              | 33               | 49             | 11             | 3                | 22                | 44              |
| 15214           | Hey2           | 5             | 2               | 26               | 26             | 6              | 3                | 26                | 28              |
| 15216           | Hfe            | 8             | 14              | 23               | 51             | 9              | 14               | 39                | 52              |
| 15218           | Foxn1          | 7             | 11              | 25               | 52             | 8              | 12               | 23                | 55              |
| 15220           | Foxq1          | 11            | 159             | 23               | 54             | 15             | 139              | 23                | 57              |
| 15221           | Foxd3          | 11            | 21              | 19               | 189            | 9              | 19               | 26                | 176             |
| 15223           | Foxj1          | 10            | 2               | 33               | 31             | 10             | 3                | 36                | 33              |
| 15227           | Foxf1a         | 18            | 6               | 22               | 305            | 17             | 8                | 20                | 188             |
| 15228           | Foxg1          | 10            | 4               | 40               | 25             | 9              | 4                | 43                | 24              |
| 15229           | Foxd1          | 7             | 14              | 22               | 58             | 7              | 5                | 22                | 63              |
| 15233           | Hgd            | 8             | 5               | 36               | 19             | 8              | 3                | 33                | 20              |
| 15234           | Hgf            | 5             | 17              | 25               | 33             | 5              | 11               | 25                | 55              |
| 15235           | Mst1           | 37            | 31              | 34               | 46             | 29             | 60               | 35                | 78              |
| 15239           | Hgs            | 70            | 202             | 50               | 213            | 69             | 149              | 41                | 176             |
| 15242           | Hhex           | 10            | 3               | 29               | 17             | 232            | 2376             | 1875              | 8890            |
| 15245           | Hhip           | 5             | 3               | 27               | 25             | 5              | 4                | 30                | 41              |
| 15247           | Hiat1          | 213           | 592             | 26               | 4419           | 217            | 518              | 25                | 3551            |
| 15248           | Hic1           | 10            | 36              | 35               | 51             | 10             | 14               | 28                | 51              |
| 15251           | Hif1a          | 156           | 208             | 27               | 1518           | 166            | 174              | 26                | 2085            |
| 15254           | Hint1          | 152           | 7432            | 2119             | 4458           | 149            | 7673             | 2011              | 4740            |
| 15257           | Hipk1          | 415           | 335             | 178              | 127            | 413            | 211              | 216               | 113             |
| 15258           | Hipk2          | 126           | 431             | 51               | 80             | 119            | 226              | 70                | 127             |
| 15259           | Hipk3          | 192           | 1010            | 28               | 187            | 188            | 784              | 31                | 157             |
| 15260           | Hira           | 72            | 74              | 174              | 108            | 75             | 53               | 126               | 89              |
| 15267           | Hist2h2aa1     | 433           | 74              | 389              | 3601           | 616            | 132              | 601               | 5585            |
| 15270           | H2afx          | 63            | 865             | 283              | 369            | 94             | 1036             | 308               | 377             |
| 15273           | Hivep2         | 160           | 179             | 37               | 3356           | 164            | 141              | 34                | 3491            |
| 15275           | Hk1            | 108           | 1620            | 1080             | 3070           | 55             | 615              | 479               | 1884            |
| 15277           | Hk2            | 11            | 8               | 46               | 56             | 16             | 133              | 261               | 649             |

| NCBI<br>Gene ID | Gene<br>Symbol | Affy.<br>CD4+ | Agilent<br>CD4+ | Illumina<br>CD4+ | Nimbl.<br>CD4+ | Affy.<br>CD19+ | Agilent<br>CD19+ | Illumina<br>CD19+ | Nimbl.<br>CD19+ |
|-----------------|----------------|---------------|-----------------|------------------|----------------|----------------|------------------|-------------------|-----------------|
| 15278           | Tfb2m          | 51            | 132             | 37               | 2163           | 51             | 139              | 34                | 1930            |
| 15288           | Hmbs           | 21            | 369             | 121              | 829            | 23             | 415              | 121               | 697             |
| 15289           | Hmgb1          | 109           | 5946            | 398              | 17986          | 110            | 6956             | 478               | 15226           |
| 15312           | Hmgn1          | 90            | 4546            | 2747             | 13595          | 100            | 8787             | 4084              | 19639           |
| 15331           | Hmgn2          | 282           | 3358            | 106              | 18255          | 276            | 4221             | 104               | 16943           |
| 15353           | Hmg20b         | 46            | 245             | 204              | 275            | 53             | 184              | 208               | 292             |
| 15354           | Hmgb3          | 31            | 205             | 24               | 1095           | 50             | 243              | 20                | 1225            |
| 15356           | Hmgcl          | 53            | 1694            | 251              | 4327           | 56             | 1905             | 240               | 4456            |
| 15357           | Hmgcr          | 150           | 253             | 71               | 450            | 129            | 256              | 59                | 357             |
| 15360           | Hmgcs2         | 6             | 2               | 24               | 67             | 7              | 6                | 20                | 47              |
| 15361           | Hmga1          | 395           | 4164            | 316              | 188            | 369            | 6973             | 376               | 207             |
| 15364           | Hmga2          | 8             | 37              | 34               | 162            | 8              | 28               | 30                | 227             |
| 15366           | Hmmr           | 4             | 2               | 30               | 172            | 5              | 3                | 29                | 466             |
| 15368           | Hmox1          | 9             | 56              | 35               | 51             | 11             | 66               | 51                | 60              |
| 15369           | Hmox2          | 107           | 1134            | 399              | 41             | 128            | 1375             | 461               | 34              |
| 15370           | Nr4a1          | 241           | 2039            | 24               | 510            | 152            | 1463             | 24                | 311             |
| 15371           | Hmx1           | 22            | 26              | 44               | 45             | 16             | 25               | 50                | 40              |
| 15372           | Hmx2           | 41            | 6               | 39               | 59             | 37             | 15               | 40                | 43              |
| 15373           | Hmx3           | 13            | 25              | 21               | 75             | 14             | 15               | 20                | 78              |
| 15374           | Hn1            | 125           | 822             | 1374             | 13560          | 144            | 835              | 1343              | 12395           |
| 15375           | Foxa1          | 8             | 2               | 26               | 18             | 7              | 3                | 25                | 20              |
| 15376           | Foxa2          | 12            | 14              | 30               | 40             | 12             | 7                | 26                | 35              |
| 15377           | Foxa3          | 6             | 8               | 26               | 36             | 6              | 8                | 27                | 39              |
| 15378           | Hnf4a          | 19            | 34              | 40               | 46             | 19             | 40               | 37                | 46              |
| 15379           | Onecut1        | 6             | 17              | 32               | 78             | 7              | 19               | 31                | 74              |
| 15381           | Hnrpc          | 234           | 457             | 6114             | 17235          | 206            | 581              | 6217              | 15997           |
| 15382           | Hnrpa1         | 354           | 2666            | 655              | 18324          | 414            | 5119             | 821               | 15132           |
| 15384           | Hnrpab         | 592           | 12680           | 4492             | 26406          | 526            | 9947             | 3929              | 24300           |
| 15387           | Hnrpk          | 1171          | 17644           | 195              | 22038          | 1199           | 23571            | 215               | 18521           |
| 15388           | Hnrpl          | 527           | 4181            | 1814             | 2124           | 492            | 4158             | 1486              | 608             |
| 15394           | Hoxa1          | 6             | 4               | 33               | 21             | 6              | 3                | 31                | 16              |
| 15395           | Hoxa10         | 7             | 2               | 20               | 34             | 7              | 3                | 25                | 67              |
| 15396           | Hoxa11         | 6             | 2               | 21               | 30             | 6              | 3                | 16                | 58              |
| 15398           | Hoxa13         | 8             | 12              | 24               | 102            | 8              | 10               | 25                | 111             |
| 15399           | Hoxa2          | 5             | 2               | 22               | 50             | 5              | 3                | 21                | 48              |
| 15400           | Hoxa3          | 5             | 32              | 28               | 37             | 5              | 37               | 31                | 17              |
| 15401           | Hoxa4          | 27            | 13              | 24               | 75             | 24             | 15               | 24                | 71              |
| 15402           | Hoxa5          | 6             | 6               | 58               | 227            | 5              | 3                | 23                | 25              |
| 15403           | Hoxa6          | 9             | 20              | 31               | 105            | 9              | 17               | 26                | 94              |
| 15404           | Hoxa7          | 21            | 36              | 77               | 55             | 18             | 7                | 30                | 62              |
| 15405           | Hoxa9          | 8             | 2               | 34               | 72             | 7              | 3                | 32                | 56              |
| 15407           | Hoxb1          | 22            | 4               | 52               | 113            | 21             | 3                | 46                | 160             |
| 15408           | Hoxb13         | 6             | 4               | 22               | 31             | 7              | 2                | 26                | 23              |
| 15410           | Hoxb3          | 23            | 2               | 39               | 100            | 22             | 3                | 39                | 185             |
| 15412           | Hoxb4          | 7             | 8               | 93               | 47             | 9              | 10               | 147               | 45              |
| 15413           | Hoxb5          | 9             | 3               | 26               | 69             | 8              | 3                | 28                | 73              |
| 15414           | Hoxb6          | 8             | 188             | 27               | 54             | 8              | 286              | 31                | 32              |
| 15415           | Hoxb7          | 9             | 11              | 43               | 39             | 8              | 13               | 40                | 69              |
| 15416           | Hoxb8          | 4             | 4               | 24               | 24             | 6              | 3                | 23                | 26              |
| 15417           | Hoxb9          | 14            | 24              | 49               | 16             | 12             | 24               | 46                | 16              |
| 15421           | Hoxc12         | 6             | 3               | 20               | 63             | 7              | 3                | 16                | 59              |

| NCBI<br>Gene ID | Gene<br>Symbol | Affy.<br>CD4+ | Agilent<br>CD4+ | Illumina<br>CD4+ | Nimbl.<br>CD4+ | Affy.<br>CD19+ | Agilent<br>CD19+ | Illumina<br>CD19+ | Nimbl.<br>CD19+ |
|-----------------|----------------|---------------|-----------------|------------------|----------------|----------------|------------------|-------------------|-----------------|
| 15422           | Hoxc13         | 6             | 3               | 30               | 52             | 6              | 5                | 29                | 55              |
| 15423           | Hoxc4          | 8             | 183             | 33               | 49             | 8              | 198              | 47                | 39              |
| 15424           | Hoxc5          | 6             | 2               | 21               | 19             | 7              | 5                | 24                | 20              |
| 15425           | Hoxc6          | 7             | 11              | 40               | 35             | 8              | 11               | 37                | 54              |
| 15426           | Hoxc8          | 9             | 3               | 48               | 45             | 8              | 3                | 41                | 57              |
| 15427           | Hoxc9          | 10            | 2               | 28               | 62             | 11             | 3                | 28                | 61              |
| 15429           | Hoxd1          | 9             | 2               | 25               | 67             | 10             | 3                | 21                | 69              |
| 15430           | Hoxd10         | 8             | 3               | 21               | 21             | 7              | 3                | 19                | 24              |
| 15431           | Hoxd11         | 10            | 2               | 38               | 78             | 11             | 4                | 32                | 60              |
| 15432           | Hoxd12         | 6             | 17              | 27               | 70             | 6              | 16               | 29                | 52              |
| 15433           | Hoxd13         | 6             | 2               | 21               | 33             | 6              | 3                | 27                | 45              |
| 15434           | Hoxd3          | 7             | 7               | 23               | 71             | 7              | 6                | 19                | 108             |
| 15436           | Hoxd4          | 6             | 3               | 19               | 55             | 6              | 3                | 22                | 56              |
| 15437           | Hoxd8          | 5             | 4               | 22               | 20             | 5              | 3                | 25                | 18              |
| 15438           | Hoxd9          | 11            | 6               | 28               | 23             | 13             | 6                | 27                | 34              |
| 15439           | Hp             | 11            | 2               | 34               | 58             | 10             | 3                | 35                | 53              |
| 15441           | Hp1bp3         | 442           | 2016            | 5337             | 814            | 229            | 791              | 2886              | 326             |
| 15442           | Hpse           | 11            | 5               | 33               | 35             | 57             | 25               | 44                | 284             |
| 15444           | Hpca           | 15            | 6               | 23               | 35             | 12             | 5                | 19                | 33              |
| 15445           | Hpd            | 7             | 9               | 28               | 47             | 7              | 5                | 28                | 49              |
| 15446           | Hpgd           | 6             | 3               | 62               | 98             | 6              | 9                | 71                | 326             |
| 15450           | Lipc           | 8             | 2               | 22               | 21             | 10             | 8                | 28                | 627             |
| 15451           | Hpn            | 13            | 16              | 30               | 54             | 10             | 14               | 31                | 59              |
| 15460           | Hr             | 13            | 4               | 29               | 31             | 13             | 4                | 33                | 34              |
| 15461           | Hras1          | 42            | 258             | 345              | 3037           | 37             | 235              | 288               | 1960            |
| 15463           | Hrb            | 843           | 810             | 1026             | 6812           | 497            | 383              | 687               | 4570            |
| 15464           | Hrc            | 10            | 3               | 28               | 33             | 10             | 5                | 30                | 38              |
| 15465           | Hrh1           | 19            | 2               | 35               | 20             | 20             | 3                | 26                | 17              |
| 15466           | Hrh2           | 17            | 10              | 27               | 128            | 14             | 13               | 30                | 110             |
| 15467           | Eif2ak1        | 75            | 88              | 377              | 317            | 108            | 132              | 500               | 346             |
| 15473           | Hrsp12         | 20            | 55              | 92               | 1360           | 28             | 87               | 143               | 2091            |
| 15476           | Hs3st1         | 9             | 2               | 18               | 47             | 21             | 192              | 381               | 2178            |
| 15478           | Hs3st3a1       | 6             | 3               | 38               | 18             | 6              | 3                | 37                | 28              |
| 15481           | Hspa8          | 2191          | 15267           | 13530            | 23009          | 2123           | 12793            | 13454             | 18805           |
| 15482           | Hspa1l         | 6             | 10              | 23               | 163            | 6              | 16               | 27                | 226             |
| 15483           | Hsd11b1        | 99            | 2264            | 1937             | 1479           | 22             | 230              | 200               | 283             |
| 15484           | Hsd11b2        | 17            | 8               | 32               | 34             | 17             | 7                | 32                | 40              |
| 15485           | Hsd17b1        | 11            | 18              | 51               | 77             | 10             | 28               | 57                | 68              |
| 15486           | Hsd17b2        | 7             | 9               | 27               | 41             | 9              | 8                | 24                | 39              |
| 15487           | Hsd17b3        | 5             | 6               | 25               | 34             | 5              | 6                | 26                | 27              |
| 15488           | Hsd17b4        | 96            | 1056            | 21               | 3852           | 56             | 526              | 19                | 1974            |
| 15490           | Hsd17b7        | 23            | 31              | 155              | 1905           | 22             | 21               | 174               | 2095            |
| 15492           | Hsd3b1         | 4             | 22              | 42               | 23             | 5              | 19               | 44                | 27              |
| 15493           | Hsd3b2         | 4             | 17              | 39               | 26             | 4              | 16               | 34                | 30              |
| 15494           | Hsd3b3         | 5             | 3               | 19               | 29             | 5              | 3                | 21                | 35              |
| 15495           | Hsd3b4         | 9             | 47              | 23               | 32             | 9              | 85               | 22                | 30              |
| 15496           | Hsd3b5         | 6             | 2               | 25               | 24             | 5              | 3                | 25                | 27              |
| 15497           | Hsd3b6         | 8             | 2               | 35               | 32             | 7              | 3                | 36                | 34              |
| 15499           | Hsf1           | 163           | 3857            | 2479             | 189            | 163            | 5336             | 2089              | 133             |
| 15500           | Hsf2           | 33            | 3               | 102              | 1671           | 20             | 3                | 75                | 875             |
| 15502           | Dnaja1         | 157           | 2604            | 31               | 15931          | 184            | 1643             | 32                | 9959            |

| NCBI<br>Gene ID | Gene<br>Symbol | Affy.<br>CD4+ | Agilent<br>CD4+ | Illumina<br>CD4+ | Nimbl.<br>CD4+ | Affy.<br>CD19+ | Agilent<br>CD19+ | Illumina<br>CD19+ | Nimbl.<br>CD19+ |
|-----------------|----------------|---------------|-----------------|------------------|----------------|----------------|------------------|-------------------|-----------------|
| 15504           | Dnajb3         | 5             | 12              | 25               | 144            | 5              | 9                | 26                | 81              |
| 15507           | Hspb1          | 7             | 17              | 39               | 169            | 8              | 21               | 57                | 216             |
| 15510           | Hspd1          | 202           | 2983            | 1281             | 5024           | 214            | 2903             | 1322              | 4873            |
| 15512           | Hspa2          | 10            | 14              | 53               | 34             | 18             | 142              | 273               | 100             |
| 15525           | Hspa4          | 186           | 595             | 155              | 1437           | 240            | 619              | 143               | 1491            |
| 15528           | Hspe1          | 357           | 2719            | 1148             | 19611          | 381            | 2323             | 1136              | 17537           |
| 15529           | Sdc2           | 4             | 2               | 22               | 20             | 4              | 5                | 27                | 33              |
| 15531           | Ndst1          | 61            | 352             | 131              | 108            | 146            | 1262             | 250               | 193             |
| 15547           | Htf9c          | 65            | 1820            | 567              | 2211           | 104            | 3316             | 803               | 4650            |
| 15550           | Htr1a          | 9             | 3               | 23               | 25             | 10             | 3                | 21                | 27              |
| 15551           | Htr1b          | 8             | 3               | 20               | 36             | 9              | 4                | 24                | 37              |
| 15552           | Htr1d          | 6             | 37              | 20               | 42             | 7              | 35               | 25                | 40              |
| 15557           | Htr1f          | 6             | 5               | 26               | 32             | 6              | 8                | 30                | 32              |
| 15558           | Htr2a          | 8             | 6               | 43               | 28             | 6              | 8                | 41                | 50              |
| 15559           | Htr2b          | 7             | 17              | 26               | 88             | 6              | 12               | 32                | 53              |
| 15560           | Htr2c          | 5             | 10              | 19               | 18             | 4              | 13               | 27                | 18              |
| 15561           | Htr3a          | 6             | 7               | 40               | 47             | 6              | 4                | 34                | 39              |
| 15562           | Htr4           | 9             | 7               | 25               | 29             | 8              | 10               | 25                | 31              |
| 15563           | Htr5a          | 5             | 54              | 28               | 54             | 5              | 48               | 22                | 80              |
| 15564           | Htr5b          | 7             | 3               | 21               | 234            | 7              | 3                | 20                | 191             |
| 15565           | Htr6           | 11            | 17              | 24               | 56             | 11             | 16               | 23                | 101             |
| 15566           | Htr7           | 7             | 5               | 35               | 23             | 6              | 3                | 37                | 25              |
| 15567           | Slc6a4         | 6             | 4               | 28               | 20             | 7              | 3                | 32                | 21              |
| 15568           | Elavl1         | 259           | 2079            | 2253             | 7514           | 253            | 1594             | 1976              | 4705            |
| 15569           | Elavl2         | 7             | 22              | 18               | 40             | 7              | 41               | 23                | 63              |
| 15571           | Elavl3         | 8             | 5               | 33               | 104            | 8              | 4                | 34                | 137             |
| 15572           | Elavl4         | 4             | 6               | 44               | 90             | 5              | 7                | 47                | 93              |
| 15574           | Hus1           | 31            | 53              | 236              | 579            | 49             | 67               | 364               | 866             |
| 15586           | Hyal1          | 5             | 2               | 34               | 408            | 5              | 4                | 32                | 416             |
| 15587           | Hyal2          | 18            | 255             | 171              | 151            | 16             | 336              | 194               | 185             |
| 15874           | lapp           | 5             | 22              | 39               | 51             | 5              | 25               | 37                | 51              |
| 15891           | lbsp           | 5             | 2               | 25               | 38             | 5              | 4                | 21                | 42              |
| 15893           | lca1           | 4             | 7               | 29               | 25             | 4              | 4                | 32                | 31              |
| 15894           | lcam1          | 29            | 406             | 352              | 2571           | 62             | 1069             | 810               | 5240            |
| 15896           | lcam2          | 107           | 3759            | 867              | 3305           | 127            | 4259             | 1246              | 4022            |
| 15898           | lcam5          | 13            | 56              | 33               | 83             | 11             | 51               | 26                | 61              |
| 15925           | lde            | 78            | 331             | 205              | 417            | 78             | 300              | 175               | 255             |
| 15926           | ldh1           | 21            | 7               | 192              | 784            | 21             | 9                | 239               | 747             |
| 15929           | ldh3g          | 182           | 1999            | 389              | 16312          | 273            | 2646             | 524               | 18882           |
| 15930           | lndo           | 6             | 9               | 24               | 61             | 6              | 6                | 21                | 68              |
| 15931           | lds            | 69            | 845             | 32               | 598            | 64             | 542              | 37                | 425             |
| 15932           | ldua           | 54            | 67              | 34               | 1422           | 57             | 53               | 35                | 1141            |
| 15936           | ler2           | 130           | 3872            | 59               | 2550           | 122            | 3074             | 51                | 2579            |
| 15937           | ler3           | 7             | 3               | 39               | 190            | 7              | 3                | 24                | 86              |
| 15939           | ler5           | 93            | 5373            | 25               | 2011           | 207            | 13845            | 21                | 4054            |
| 15945           | Cxcl10         | 11            | 3               | 17               | 59             | 9              | 3                | 21                | 41              |
| 15950           | lfi203         | 398           | 1488            | 375              | 7894           | 513            | 1749             | 413               | 7187            |
| 15953           | Olfir56        | 79            | 20              | 18               | 30             | 38             | 13               | 19                | 32              |
| 15957           | lfit1          | 22            | 94              | 21               | 441            | 9              | 12               | 20                | 69              |
| 15958           | lfit2          | 82            | 135             | 501              | 3331           | 16             | 29               | 117               | 694             |
| 15959           | lfit3          | 9             | 213             | 37               | 1356           | 10             | 241              | 37                | 1121            |

| NCBI<br>Gene ID | Gene<br>Symbol | Affy.<br>CD4+ | Agilent<br>CD4+ | Illumina<br>CD4+ | Nimbl.<br>CD4+ | Affy.<br>CD19+ | Agilent<br>CD19+ | Illumina<br>CD19+ | Nimbl.<br>CD19+ |
|-----------------|----------------|---------------|-----------------|------------------|----------------|----------------|------------------|-------------------|-----------------|
| 15965           | Ifna2          | 8             | 8               | 23               | 34             | 8              | 8                | 24                | 32              |
| 15967           | Ifna4          | 6             | 2               | 23               | 13             | 6              | 3                | 27                | 15              |
| 15972           | Ifna9          | 9             | 49              | 32               | 58             | 13             | 37               | 25                | 54              |
| 15974           | Ifnab          | 8             | 50              | 23               | 51             | 10             | 37               | 25                | 55              |
| 15975           | Ifnar1         | 168           | 529             | 32               | 2118           | 153            | 435              | 27                | 1373            |
| 15976           | Ifnar2         | 118           | 474             | 185              | 6681           | 105            | 339              | 145               | 8513            |
| 15977           | Ifnb1          | 5             | 3               | 33               | 38             | 5              | 3                | 30                | 34              |
| 15978           | Ifng           | 8             | 46              | 29               | 27             | 6              | 22               | 32                | 60              |
| 15979           | Ifngr1         | 155           | 3446            | 339              | 2578           | 150            | 3433             | 314               | 2324            |
| 15980           | Ifngr2         | 225           | 1189            | 1156             | 1042           | 339            | 1748             | 1506              | 1231            |
| 15982           | Ifrd1          | 94            | 925             | 36               | 2183           | 68             | 530              | 32                | 1462            |
| 15983           | Ifrd2          | 79            | 236             | 162              | 243            | 86             | 224              | 149               | 184             |
| 15985           | Cd79b          | 12            | 50              | 53               | 211            | 1550           | 59651            | 14103             | 18177           |
| 16000           | Igf1           | 8             | 12              | 31               | 107            | 9              | 8                | 34                | 380             |
| 16001           | Igf1r          | 45            | 71              | 38               | 497            | 10             | 26               | 28                | 133             |
| 16002           | Igf2           | 12            | 3               | 39               | 39             | 13             | 4                | 36                | 25              |
| 16004           | Igf2r          | 117           | 2078            | 484              | 6117           | 39             | 414              | 88                | 591             |
| 16005           | Igfals         | 7             | 10              | 22               | 40             | 7              | 8                | 18                | 63              |
| 16006           | Igfbp1         | 7             | 2               | 19               | 33             | 7              | 3                | 18                | 43              |
| 16007           | Cyr61          | 8             | 20              | 24               | 97             | 9              | 17               | 23                | 126             |
| 16008           | Igfbp2         | 18            | 6               | 29               | 51             | 20             | 8                | 26                | 59              |
| 16009           | Igfbp3         | 12            | 6               | 27               | 49             | 9              | 8                | 27                | 45              |
| 16010           | Igfbp4         | 486           | 148             | 3106             | 3065           | 13             | 4                | 26                | 20              |
| 16011           | Igfbp5         | 10            | 9               | 22               | 29             | 9              | 12               | 32                | 52              |
| 16012           | Igfbp6         | 9             | 4               | 34               | 167            | 10             | 6                | 31                | 198             |
| 16068           | Il18bp         | 67            | 32              | 55               | 180            | 60             | 28               | 44                | 130             |
| 16069           | Igj            | 6             | 5               | 22               | 18             | 49             | 1204             | 29                | 1828            |
| 16142           | Igl-v1         | 9             | 24              | 30               | 40             | 636            | 26302            | 17640             | 17926           |
| 16147           | Ihh            | 30            | 21              | 28               | 43             | 28             | 13               | 27                | 43              |
| 16150           | Ikbkb          | 203           | 785             | 3583             | 11055          | 207            | 632              | 3900              | 10276           |
| 16151           | Ikbkg          | 44            | 54              | 314              | 1106           | 46             | 47               | 343               | 1028            |
| 16153           | Il10           | 5             | 20              | 31               | 31             | 4              | 15               | 31                | 26              |
| 16154           | Il10ra         | 27            | 238             | 144              | 204            | 180            | 1612             | 763               | 1320            |
| 16155           | Il10rb         | 105           | 791             | 266              | 1451           | 235            | 1794             | 525               | 2152            |
| 16156           | Il11           | 5             | 40              | 22               | 17             | 5              | 54               | 24                | 18              |
| 16157           | Il11ra1        | 30            | 992             | 511              | 351            | 29             | 645              | 335               | 389             |
| 16159           | Il12a          | 11            | 8               | 28               | 23             | 63             | 343              | 719               | 860             |
| 16160           | Il12b          | 7             | 3               | 25               | 24             | 7              | 10               | 27                | 26              |
| 16161           | Il12rb1        | 21            | 60              | 54               | 46             | 19             | 27               | 44                | 47              |
| 16162           | Il12rb2        | 5             | 10              | 31               | 762            | 5              | 6                | 27                | 322             |
| 16163           | Il13           | 11            | 28              | 46               | 94             | 13             | 30               | 41                | 126             |
| 16164           | Il13ra1        | 5             | 8               | 21               | 36             | 5              | 5                | 24                | 56              |
| 16165           | Il13ra2        | 4             | 2               | 23               | 17             | 4              | 3                | 19                | 17              |
| 16168           | Il15           | 5             | 37              | 31               | 29             | 4              | 50               | 47                | 99              |
| 16169           | Il15ra         | 20            | 52              | 47               | 606            | 22             | 56               | 42                | 393             |
| 16170           | Il16           | 49            | 2565            | 2647             | 14839          | 44             | 3011             | 2615              | 13996           |
| 16173           | Il18           | 4             | 17              | 17               | 27             | 8              | 102              | 99                | 945             |
| 16174           | Il18rap        | 7             | 3               | 29               | 49             | 6              | 3                | 26                | 60              |
| 16175           | Il1a           | 5             | 5               | 33               | 45             | 5              | 3                | 26                | 53              |
| 16176           | Il1b           | 7             | 5               | 24               | 53             | 7              | 5                | 20                | 76              |
| 16177           | Il1r1          | 4             | 2               | 40               | 33             | 4              | 3                | 44                | 157             |

| NCBI<br>Gene ID | Gene<br>Symbol | Affy.<br>CD4+ | Agilent<br>CD4+ | Illumina<br>CD4+ | Nimbl.<br>CD4+ | Affy.<br>CD19+ | Agilent<br>CD19+ | Illumina<br>CD19+ | Nimbl.<br>CD19+ |
|-----------------|----------------|---------------|-----------------|------------------|----------------|----------------|------------------|-------------------|-----------------|
| 16178           | Il1r2          | 5             | 3               | 30               | 62             | 5              | 3                | 27                | 79              |
| 16179           | Irak1          | 97            | 1070            | 444              | 890            | 111            | 1083             | 535               | 1116            |
| 16180           | Il1rap         | 24            | 22              | 35               | 79             | 21             | 16               | 35                | 88              |
| 16181           | Il1rn          | 8             | 3               | 15               | 46             | 7              | 3                | 21                | 45              |
| 16182           | Il18r1         | 39            | 433             | 624              | 506            | 9              | 8                | 45                | 58              |
| 16183           | Il2            | 5             | 15              | 35               | 165            | 5              | 12               | 21                | 40              |
| 16184           | Il2ra          | 46            | 54              | 96               | 1004           | 8              | 20               | 25                | 68              |
| 16185           | Il2rb          | 94            | 901             | 87               | 377            | 11             | 33               | 50                | 65              |
| 16186           | Il2rg          | 1637          | 1013            | 1885             | 17368          | 1306           | 719              | 1269              | 13716           |
| 16187           | Il3            | 4             | 2               | 22               | 28             | 4              | 3                | 20                | 32              |
| 16188           | Il3ra          | 29            | 161             | 85               | 45             | 30             | 184              | 97                | 45              |
| 16189           | Il4            | 6             | 6               | 31               | 46             | 7              | 4                | 33                | 27              |
| 16190           | Il4ra          | 410           | 1735            | 317              | 4729           | 441            | 1898             | 294               | 5720            |
| 16191           | Il5            | 5             | 2               | 27               | 27             | 5              | 3                | 30                | 26              |
| 16192           | Il5ra          | 7             | 2               | 31               | 28             | 80             | 110              | 111               | 839             |
| 16193           | Il6            | 4             | 3               | 22               | 15             | 4              | 3                | 23                | 15              |
| 16194           | Il6ra          | 565           | 123             | 2069             | 2856           | 71             | 39               | 226               | 1520            |
| 16195           | Il6st          | 549           | 781             | 363              | 3085           | 51             | 83               | 40                | 191             |
| 16196           | Il7            | 5             | 3               | 28               | 19             | 5              | 3                | 28                | 18              |
| 16197           | Il7r           | 896           | 3484            | 4027             | 11256          | 12             | 101              | 30                | 50              |
| 16198           | Il9            | 6             | 4               | 24               | 29             | 6              | 3                | 20                | 51              |
| 16199           | Il9r           | 19            | 5               | 26               | 38             | 135            | 18               | 33                | 158             |
| 16201           | Ilf3           | 100           | 764             | 790              | 14040          | 123            | 898              | 932               | 18982           |
| 16202           | Ilk            | 335           | 675             | 120              | 2612           | 266            | 432              | 74                | 1476            |
| 16204           | Fabp6          | 5             | 3               | 26               | 51             | 4              | 3                | 26                | 53              |
| 16206           | Lrig1          | 63            | 481             | 460              | 2421           | 13             | 14               | 26                | 61              |
| 16210           | Impact         | 91            | 346             | 234              | 1754           | 95             | 347              | 251               | 1654            |
| 16211           | Kpnb1          | 354           | 575             | 554              | 2698           | 319            | 409              | 476               | 2089            |
| 16319           | Incenp         | 29            | 625             | 145              | 1903           | 30             | 740              | 150               | 1525            |
| 16322           | Inha           | 12            | 11              | 21               | 50             | 12             | 16               | 17                | 74              |
| 16324           | Inhbb          | 6             | 21              | 20               | 22             | 8              | 14               | 20                | 21              |
| 16325           | Inhbc          | 7             | 13              | 22               | 24             | 8              | 10               | 24                | 26              |
| 16326           | Inhbe          | 5             | 22              | 27               | 23             | 5              | 24               | 29                | 24              |
| 16329           | Inpp1          | 125           | 31              | 636              | 10064          | 44             | 12               | 170               | 3933            |
| 16330           | Inpp5b         | 135           | 545             | 101              | 4964           | 56             | 148              | 44                | 1351            |
| 16331           | Inpp5d         | 258           | 869             | 470              | 3015           | 500            | 1460             | 878               | 5115            |
| 16332           | Inpp1          | 14            | 32              | 68               | 180            | 27             | 61               | 256               | 345             |
| 16333           | Ins1           | 6             | 10              | 36               | 20             | 6              | 10               | 35                | 32              |
| 16334           | Ins2           | 10            | 16              | 58               | 39             | 11             | 11               | 54                | 47              |
| 16337           | Insr           | 99            | 10              | 51               | 86             | 90             | 5                | 45                | 55              |
| 16348           | Invs           | 44            | 7               | 210              | 299            | 60             | 7                | 346               | 424             |
| 16351           | Ipp            | 15            | 62              | 111              | 1535           | 16             | 59               | 115               | 1293            |
| 16362           | Irf1           | 328           | 6010            | 1445             | 4844           | 194            | 4228             | 946               | 3854            |
| 16363           | Irf2           | 184           | 308             | 2060             | 218            | 236            | 491              | 2869              | 410             |
| 16364           | Irf4           | 15            | 9               | 95               | 197            | 165            | 156              | 1080              | 2643            |
| 16367           | Irs1           | 12            | 5               | 32               | 23             | 14             | 11               | 33                | 26              |
| 16369           | Irs3           | 11            | 4               | 23               | 62             | 11             | 4                | 23                | 52              |
| 16370           | Irs4           | 7             | 52              | 25               | 27             | 6              | 49               | 23                | 27              |
| 16371           | Irx1           | 10            | 20              | 25               | 56             | 10             | 16               | 24                | 53              |
| 16372           | Irx2           | 29            | 9               | 21               | 56             | 26             | 8                | 21                | 59              |
| 16373           | Irx3           | 12            | 3               | 25               | 32             | 10             | 3                | 25                | 39              |



| NCBI<br>Gene ID | Gene<br>Symbol | Affy.<br>CD4+ | Agilent<br>CD4+ | Illumina<br>CD4+ | Nimbl.<br>CD4+ | Affy.<br>CD19+ | Agilent<br>CD19+ | Illumina<br>CD19+ | Nimbl.<br>CD19+ |
|-----------------|----------------|---------------|-----------------|------------------|----------------|----------------|------------------|-------------------|-----------------|
| 16392           | Isl1           | 6             | 8               | 26               | 21             | 6              | 7                | 26                | 28              |
| 16396           | Itch           | 170           | 602             | 195              | 5081           | 180            | 773              | 263               | 5587            |
| 16399           | Itga2b         | 15            | 8               | 29               | 378            | 13             | 5                | 24                | 196             |
| 16400           | Itga3          | 11            | 39              | 40               | 48             | 11             | 63               | 29                | 48              |
| 16402           | Itga5          | 11            | 15              | 26               | 58             | 7              | 6                | 23                | 61              |
| 16403           | Itga6          | 240           | 1437            | 954              | 1486           | 35             | 186              | 150               | 70              |
| 16404           | Itga7          | 15            | 48              | 25               | 97             | 13             | 40               | 19                | 69              |
| 16407           | Itgae          | 6             | 43              | 66               | 101            | 6              | 25               | 41                | 58              |
| 16408           | Itgal          | 388           | 2448            | 271              | 3498           | 186            | 747              | 118               | 1533            |
| 16409           | Itgam          | 9             | 8               | 24               | 35             | 8              | 5                | 24                | 30              |
| 16410           | Itgav          | 68            | 64              | 33               | 86             | 87             | 88               | 44                | 73              |
| 16411           | Itgax          | 7             | 35              | 25               | 40             | 6              | 34               | 23                | 53              |
| 16412           | Itgb1          | 111           | 95              | 492              | 882            | 86             | 54               | 398               | 548             |
| 16413           | Itgb1bp1       | 68            | 524             | 21               | 7141           | 58             | 490              | 22                | 5346            |
| 16414           | Itgb2          | 586           | 2487            | 430              | 26971          | 186            | 621              | 109               | 14438           |
| 16415           | Itgb2l         | 12            | 8               | 26               | 71             | 12             | 7                | 31                | 34              |
| 16416           | Itgb3          | 243           | 3422            | 57               | 146            | 52             | 600              | 36                | 70              |
| 16419           | Itgb5          | 6             | 5               | 27               | 38             | 6              | 13               | 28                | 51              |
| 16420           | Itgb6          | 5             | 2               | 26               | 62             | 5              | 311              | 35                | 44              |
| 16421           | Itgb7          | 384           | 14372           | 3117             | 4431           | 115            | 3815             | 750               | 1247            |
| 16423           | Cd47           | 580           | 2242            | 1754             | 19139          | 507            | 1648             | 1255              | 16148           |
| 16424           | Itih1          | 6             | 28              | 23               | 24             | 6              | 14               | 23                | 24              |
| 16425           | Itih2          | 7             | 10              | 32               | 57             | 6              | 12               | 29                | 35              |
| 16426           | Itih3          | 9             | 10              | 17               | 26             | 10             | 11               | 22                | 29              |
| 16427           | Itih4          | 9             | 42              | 25               | 34             | 8              | 52               | 33                | 31              |
| 16428           | Itk            | 1094          | 2311            | 3227             | 8164           | 12             | 65               | 48                | 99              |
| 16431           | Itm2a          | 320           | 3212            | 720              | 2876           | 19             | 185              | 62                | 200             |
| 16432           | Itm2b          | 542           | 3496            | 6379             | 29234          | 431            | 1986             | 4385              | 20521           |
| 16433           | Cuzd1          | 8             | 2               | 18               | 14             | 7              | 3                | 25                | 16              |
| 16434           | Itpa           | 74            | 888             | 20               | 1146           | 70             | 945              | 18                | 1331            |
| 16438           | Itpr1          | 122           | 527             | 968              | 3888           | 221            | 1025             | 1628              | 5380            |
| 16439           | Itpr2          | 352           | 4032            | 39               | 3409           | 268            | 2941             | 37                | 2471            |
| 16440           | Itpr3          | 204           | 5589            | 552              | 1066           | 316            | 8263             | 752               | 1606            |
| 16443           | Itsn1          | 12            | 7               | 30               | 129            | 22             | 11               | 31                | 205             |
| 16449           | Jag1           | 8             | 11              | 22               | 74             | 8              | 3                | 19                | 35              |
| 16450           | Jag2           | 15            | 23              | 34               | 191            | 12             | 6                | 30                | 103             |
| 16451           | Jak1           | 1282          | 6066            | 591              | 14494          | 870            | 3037             | 323               | 10353           |
| 16452           | Jak2           | 213           | 467             | 498              | 4286           | 206            | 434              | 470               | 3784            |
| 16453           | Insl3          | 168           | 402             | 25               | 3079           | 121            | 193              | 20                | 2237            |
| 16456           | F11r           | 5             | 5               | 18               | 55             | 6              | 16               | 13                | 77              |
| 16467           | Atcay          | 14            | 23              | 29               | 58             | 11             | 14               | 25                | 50              |
| 16468           | Jarid2         | 179           | 909             | 36               | 1841           | 246            | 1252             | 36                | 1789            |
| 16469           | Jrk            | 18            | 14              | 46               | 532            | 17             | 19               | 47                | 805             |
| 16470           | Ush1g          | 17            | 29              | 30               | 34             | 17             | 34               | 33                | 45              |
| 16475           | Jub            | 6             | 10              | 27               | 17             | 6              | 4                | 25                | 22              |
| 16476           | Jun            | 268           | 171             | 184              | 2396           | 250            | 188              | 190               | 2980            |
| 16477           | Junb           | 155           | 15811           | 1065             | 1090           | 95             | 7718             | 504               | 726             |
| 16478           | Jund1          | 405           | 18172           | 194              | 161            | 496            | 22048            | 215               | 168             |
| 16480           | Jup            | 16            | 5               | 45               | 69             | 10             | 4                | 47                | 52              |
| 16483           | Kap            | 7             | 2               | 25               | 15             | 6              | 4                | 26                | 16              |
| 16485           | Kcna1          | 8             | 5               | 26               | 28             | 7              | 6                | 26                | 25              |

| NCBI<br>Gene ID | Gene<br>Symbol | Affy.<br>CD4+ | Agilent<br>CD4+ | Illumina<br>CD4+ | Nimbl.<br>CD4+ | Affy.<br>CD19+ | Agilent<br>CD19+ | Illumina<br>CD19+ | Nimbl.<br>CD19+ |
|-----------------|----------------|---------------|-----------------|------------------|----------------|----------------|------------------|-------------------|-----------------|
| 16490           | Kcna2          | 13            | 4               | 33               | 17             | 10             | 3                | 27                | 17              |
| 16491           | Kcna3          | 117           | 9               | 53               | 113            | 107            | 5                | 51                | 107             |
| 16492           | Kcna4          | 5             | 16              | 28               | 21             | 5              | 4                | 29                | 36              |
| 16493           | Kcna5          | 5             | 3               | 16               | 27             | 5              | 3                | 15                | 47              |
| 16494           | Kcna6          | 6             | 3               | 41               | 42             | 7              | 3                | 37                | 34              |
| 16495           | Kcna7          | 15            | 236             | 17               | 47             | 14             | 234              | 20                | 51              |
| 16497           | Kcnab1         | 6             | 2               | 36               | 112            | 5              | 3                | 31                | 67              |
| 16498           | Kcnab2         | 302           | 838             | 2767             | 225            | 124            | 296              | 1213              | 167             |
| 16499           | Kcnab3         | 7             | 3               | 37               | 100            | 6              | 3                | 27                | 97              |
| 16500           | Kcnb1          | 9             | 9               | 26               | 41             | 10             | 37               | 38                | 81              |
| 16502           | Kcnc1          | 7             | 4               | 24               | 33             | 8              | 4                | 23                | 32              |
| 16504           | Kcnc3          | 8             | 49              | 42               | 42             | 7              | 58               | 40                | 371             |
| 16506           | Kcnd1          | 9             | 4               | 36               | 34             | 11             | 3                | 29                | 41              |
| 16508           | Kcnd2          | 7             | 2               | 26               | 17             | 6              | 3                | 27                | 20              |
| 16509           | Kcne1          | 7             | 16              | 30               | 59             | 6              | 18               | 31                | 72              |
| 16510           | Kcnh1          | 8             | 3               | 33               | 38             | 8              | 4                | 31                | 45              |
| 16511           | Kcnh2          | 22            | 58              | 46               | 57             | 13             | 14               | 13                | 40              |
| 16512           | Kcnh3          | 17            | 14              | 53               | 78             | 13             | 8                | 23                | 63              |
| 16513           | Kcnj10         | 7             | 2               | 31               | 31             | 8              | 6                | 29                | 59              |
| 16514           | Kcnj11         | 10            | 7               | 26               | 65             | 10             | 8                | 29                | 94              |
| 16515           | Kcnj12         | 6             | 3               | 26               | 24             | 6              | 3                | 28                | 26              |
| 16516           | Kcnj15         | 9             | 21              | 29               | 96             | 9              | 16               | 34                | 147             |
| 16517           | Kcnj16         | 7             | 29              | 51               | 260            | 6              | 14               | 45                | 225             |
| 16518           | Kcnj2          | 5             | 2               | 31               | 14             | 4              | 3                | 28                | 12              |
| 16519           | Kcnj3          | 6             | 7               | 25               | 31             | 6              | 3                | 22                | 32              |
| 16520           | Kcnj4          | 13            | 27              | 28               | 52             | 13             | 17               | 25                | 57              |
| 16521           | Kcnj5          | 8             | 2               | 28               | 38             | 7              | 6                | 30                | 39              |
| 16522           | Kcnj6          | 5             | 27              | 36               | 48             | 5              | 20               | 33                | 71              |
| 16523           | Kcnj8          | 11            | 7               | 28               | 19             | 10             | 6                | 24                | 24              |
| 16524           | Kcnj9          | 6             | 13              | 29               | 32             | 6              | 12               | 30                | 24              |
| 16525           | Kcnk1          | 11            | 5               | 34               | 75             | 10             | 5                | 28                | 109             |
| 16526           | Kcnk2          | 11            | 2               | 24               | 123            | 9              | 3                | 26                | 86              |
| 16527           | Kcnk3          | 12            | 32              | 26               | 61             | 11             | 22               | 30                | 65              |
| 16528           | Kcnk4          | 26            | 11              | 20               | 69             | 28             | 12               | 24                | 45              |
| 16529           | Kcnk5          | 6             | 2               | 36               | 13             | 50             | 85               | 84                | 150             |
| 16530           | Kcnk7          | 13            | 8               | 35               | 148            | 13             | 4                | 32                | 130             |
| 16531           | Kcnma1         | 6             | 3               | 29               | 31             | 5              | 2                | 30                | 41              |
| 16533           | Kcnmb1         | 6             | 2               | 21               | 47             | 6              | 4                | 28                | 43              |
| 16534           | Kcnn4          | 464           | 2175            | 1401             | 7289           | 44             | 213              | 110               | 1407            |
| 16535           | Kcnq1          | 10            | 42              | 33               | 61             | 10             | 44               | 35                | 86              |
| 16536           | Kcnq2          | 9             | 2               | 45               | 87             | 9              | 3                | 45                | 203             |
| 16538           | Kcns1          | 6             | 2               | 41               | 52             | 6              | 3                | 37                | 59              |
| 16539           | Kcns2          | 6             | 3               | 34               | 33             | 5              | 8                | 31                | 26              |
| 16541           | Napsa          | 12            | 3               | 22               | 64             | 374            | 5549             | 2472              | 9756            |
| 16542           | Kdr            | 6             | 13              | 83               | 29             | 5              | 13               | 82                | 42              |
| 16545           | Kera           | 4             | 2               | 22               | 27             | 5              | 4                | 25                | 29              |
| 16548           | Khk            | 23            | 332             | 148              | 43             | 26             | 332              | 129               | 29              |
| 16549           | Khsrp          | 101           | 928             | 28               | 366            | 104            | 1075             | 33                | 313             |
| 16551           | Kif11          | 9             | 3               | 21               | 192            | 13             | 6                | 21                | 401             |
| 16552           | Kif12          | 9             | 25              | 46               | 87             | 9              | 24               | 44                | 78              |
| 16553           | Kif13a         | 9             | 4               | 43               | 17             | 10             | 5                | 47                | 18              |

| NCBI Gene ID | Gene Symbol | Affy. CD4+ | Agilent CD4+ | Illumina CD4+ | Nimbl. CD4+ | Affy. CD19+ | Agilent CD19+ | Illumina CD19+ | Nimbl. CD19+ |
|--------------|-------------|------------|--------------|---------------|-------------|-------------|---------------|----------------|--------------|
| 16554        | Kif13b      | 63         | 4            | 78            | 44          | 63          | 7             | 71             | 63           |
| 16558        | Kif16b      | 86         | 50           | 43            | 903         | 80          | 54            | 44             | 973          |
| 16559        | Kif17       | 10         | 4            | 40            | 49          | 9           | 9             | 41             | 49           |
| 16560        | Kif1a       | 7          | 11           | 31            | 75          | 7           | 7             | 32             | 81           |
| 16561        | Kif1b       | 111        | 257          | 453           | 5900        | 26          | 32            | 76             | 890          |
| 16562        | Kif1c       | 37         | 53           | 78            | 1949        | 35          | 52            | 78             | 1502         |
| 16563        | Kif2a       | 121        | 259          | 40            | 6345        | 67          | 193           | 31             | 3350         |
| 16564        | Kif21a      | 7          | 3            | 31            | 51          | 7           | 3             | 29             | 70           |
| 16565        | Kif21b      | 693        | 9976         | 263           | 2020        | 395         | 5152          | 136            | 1408         |
| 16568        | Kif3a       | 8          | 16           | 77            | 777         | 8           | 15            | 47             | 411          |
| 16569        | Kif3b       | 95         | 63           | 313           | 295         | 60          | 46            | 191            | 255          |
| 16570        | Kif3c       | 29         | 75           | 219           | 209         | 26          | 59            | 162            | 172          |
| 16571        | Kif4        | 6          | 20           | 31            | 96          | 7           | 52            | 53             | 314          |
| 16572        | Kif5a       | 8          | 10           | 35            | 40          | 7           | 3             | 31             | 56           |
| 16573        | Kif5b       | 192        | 1636         | 24            | 3132        | 153         | 836           | 21             | 2527         |
| 16574        | Kif5c       | 8          | 34           | 52            | 78          | 7           | 13            | 34             | 38           |
| 16578        | Kif9        | 7          | 3            | 20            | 60          | 10          | 13            | 34             | 338          |
| 16579        | Kifap3      | 10         | 41           | 38            | 159         | 9           | 21            | 41             | 134          |
| 16580        | Kifc1       | 57         | 331          | 64            | 870         | 41          | 34            | 31             | 179          |
| 16581        | Kifc2       | 22         | 156          | 88            | 400         | 17          | 71            | 45             | 427          |
| 16582        | Kifc3       | 13         | 16           | 36            | 18          | 15          | 11            | 35             | 38           |
| 16588        | Kin         | 39         | 1054         | 309           | 3204        | 33          | 803           | 231            | 2310         |
| 16590        | Kit         | 6          | 8            | 29            | 88          | 6           | 27            | 33             | 87           |
| 16591        | Kl          | 7          | 5            | 23            | 18          | 7           | 4             | 23             | 20           |
| 16592        | Fabp5       | 9          | 4            | 22            | 171         | 8           | 3             | 25             | 95           |
| 16594        | Klc2        | 38         | 37           | 46            | 98          | 42          | 54            | 44             | 133          |
| 16596        | Klf1        | 8          | 4            | 43            | 49          | 8           | 5             | 39             | 64           |
| 16597        | Klf12       | 6          | 12           | 32            | 17          | 12          | 13            | 30             | 29           |
| 16598        | Klf2        | 312        | 19445        | 3837          | 1976        | 325         | 17978         | 3310           | 2041         |
| 16599        | Klf3        | 249        | 332          | 2688          | 9245        | 144         | 129           | 1444           | 4626         |
| 16600        | Klf4        | 32         | 270          | 53            | 2367        | 48          | 871           | 193            | 8585         |
| 16612        | Klk1        | 7          | 37           | 28            | 39          | 9           | 39            | 28             | 39           |
| 16625        | Serpina3c   | 5          | 10           | 22            | 22          | 5           | 10            | 26             | 25           |
| 16633        | Klra2       | 5          | 3            | 25            | 25          | 5           | 3             | 28             | 36           |
| 16634        | Klra3       | 7          | 14           | 32            | 28          | 7           | 14            | 38             | 72           |
| 16636        | Klra5       | 4          | 19           | 25            | 33          | 4           | 24            | 24             | 40           |
| 16639        | Klra8       | 4          | 2            | 39            | 60          | 4           | 3             | 35             | 77           |
| 16640        | Klra9       | 4          | 3            | 25            | 35          | 4           | 4             | 27             | 47           |
| 16641        | Klrc1       | 4          | 4            | 31            | 20          | 5           | 4             | 34             | 19           |
| 16642        | Klrc2       | 5          | 4            | 30            | 37          | 5           | 6             | 28             | 88           |
| 16643        | Klrd1       | 14         | 333          | 492           | 2656        | 5           | 22            | 46             | 159          |
| 16644        | Kng1        | 4          | 3            | 32            | 16          | 6           | 3             | 32             | 25           |
| 16646        | Kpna1       | 123        | 234          | 227           | 1171        | 136         | 354           | 296            | 1638         |
| 16647        | Kpna2       | 48         | 535          | 95            | 2262        | 77          | 1036          | 140            | 3113         |
| 16648        | Kpna3       | 61         | 255          | 131           | 4608        | 67          | 289           | 184            | 5182         |
| 16649        | Kpna4       | 139        | 342          | 46            | 320         | 100         | 230           | 43             | 237          |
| 16650        | Kpna6       | 67         | 607          | 31            | 1393        | 70          | 522           | 29             | 1175         |
| 16651        | Sspn        | 7          | 10           | 24            | 25          | 9           | 95            | 146            | 175          |
| 16656        | Hivep3      | 26         | 116          | 364           | 33          | 29          | 90            | 430            | 42           |
| 16658        | Mafb        | 6          | 2            | 19            | 36          | 6           | 6             | 22             | 62           |
| 16694        | Krtap12-1   | 9          | 4            | 26            | 25          | 8           | 2             | 25             | 23           |

| NCBI<br>Gene ID | Gene<br>Symbol | Affy.<br>CD4+ | Agilent<br>CD4+ | Illumina<br>CD4+ | Nimbl.<br>CD4+ | Affy.<br>CD19+ | Agilent<br>CD19+ | Illumina<br>CD19+ | Nimbl.<br>CD19+ |
|-----------------|----------------|---------------|-----------------|------------------|----------------|----------------|------------------|-------------------|-----------------|
| 16699           | Krtap13        | 5             | 8               | 22               | 20             | 5              | 15               | 22                | 16              |
| 16700           | Krtap6-1       | 4             | 63              | 26               | 24             | 4              | 50               | 27                | 22              |
| 16701           | Krtap16-7      | 4             | 17              | 20               | 499            | 4              | 18               | 24                | 543             |
| 16704           | Krtap8-2       | 4             | 3               | 18               | 15             | 4              | 3                | 23                | 16              |
| 16705           | Krtap9-1       | 49            | 150             | 32               | 39             | 49             | 109              | 29                | 48              |
| 16709           | Ktn1           | 60            | 750             | 184              | 975            | 113            | 1686             | 371               | 1592            |
| 16716           | Ky             | 6             | 8               | 36               | 66             | 6              | 3                | 37                | 73              |
| 16728           | L1cam          | 57            | 27              | 30               | 824            | 24             | 22               | 29                | 411             |
| 16763           | Lad1           | 18            | 14              | 42               | 115            | 14             | 3                | 22                | 90              |
| 16765           | Stmn1          | 105           | 2194            | 146              | 24227          | 82             | 1348             | 90                | 15992           |
| 16768           | Lag3           | 12            | 13              | 40               | 33             | 13             | 3                | 24                | 31              |
| 16769           | Dsg4           | 5             | 6               | 38               | 23             | 5              | 3                | 40                | 23              |
| 16770           | Lalba          | 8             | 15              | 21               | 16             | 6              | 9                | 21                | 17              |
| 16772           | Lama1          | 10            | 2               | 21               | 25             | 10             | 4                | 16                | 25              |
| 16773           | Lama2          | 5             | 6               | 29               | 41             | 5              | 6                | 29                | 55              |
| 16775           | Lama4          | 5             | 6               | 140              | 21             | 5              | 5                | 134               | 21              |
| 16776           | Lama5          | 12            | 5               | 22               | 57             | 11             | 3                | 22                | 63              |
| 16777           | Lamb1-1        | 8             | 2               | 19               | 54             | 8              | 4                | 20                | 48              |
| 16779           | Lamb2          | 12            | 6               | 51               | 125            | 10             | 4                | 57                | 105             |
| 16780           | Lamb3          | 9             | 12              | 37               | 147            | 11             | 19               | 49                | 425             |
| 16782           | Lamc2          | 10            | 7               | 29               | 19             | 9              | 9                | 32                | 24              |
| 16783           | Lamp1          | 209           | 1121            | 851              | 4507           | 238            | 1116             | 920               | 5272            |
| 16784           | Lamp2          | 32            | 191             | 366              | 1312           | 84             | 445              | 963               | 2656            |
| 16790           | Anpep          | 5             | 22              | 28               | 26             | 5              | 21               | 27                | 23              |
| 16792           | Laptm5         | 1978          | 1344            | 14226            | 7122           | 1491           | 562              | 9391              | 5579            |
| 16795           | Large          | 5             | 6               | 29               | 20             | 5              | 4                | 28                | 22              |
| 16796           | Lasp1          | 401           | 6642            | 2399             | 1007           | 158            | 3377             | 1098              | 307             |
| 16797           | Lat            | 926           | 9960            | 4162             | 21933          | 15             | 216              | 39                | 401             |
| 16800           | Arhgef2        | 129           | 494             | 73               | 2888           | 134            | 393              | 72                | 2859            |
| 16801           | Arhgef1        | 799           | 3082            | 7765             | 1397           | 493            | 1409             | 4097              | 581             |
| 16803           | Lbp            | 39            | 88              | 103              | 1473           | 12             | 7                | 19                | 51              |
| 16816           | Lcat           | 10            | 5               | 34               | 213            | 10             | 6                | 32                | 249             |
| 16818           | Lck            | 899           | 12214           | 6921             | 14127          | 61             | 694              | 407               | 830             |
| 16819           | Lcn2           | 6             | 2               | 24               | 64             | 6              | 3                | 25                | 69              |
| 16820           | Lcn3           | 4             | 2               | 25               | 29             | 5              | 3                | 29                | 36              |
| 16821           | Lcn4           | 5             | 5               | 24               | 908            | 5              | 4                | 22                | 32              |
| 16822           | Lcp2           | 447           | 922             | 723              | 1686           | 11             | 21               | 29                | 12              |
| 16825           | Ldb1           | 568           | 1563            | 6425             | 928            | 337            | 723              | 3630              | 419             |
| 16826           | Ldb2           | 7             | 22              | 46               | 82             | 6              | 17               | 41                | 88              |
| 16835           | Ldlr           | 99            | 1070            | 734              | 340            | 40             | 330              | 243               | 70              |
| 16840           | Lect1          | 10            | 3               | 23               | 38             | 10             | 3                | 21                | 56              |
| 16841           | Lect2          | 5             | 27              | 30               | 34             | 6              | 27               | 35                | 21              |
| 16842           | Lef1           | 1237          | 10216           | 354              | 9140           | 61             | 447              | 30                | 1034            |
| 16846           | Lep            | 6             | 4               | 27               | 20             | 5              | 13               | 21                | 21              |
| 16847           | Lepr           | 4             | 3               | 40               | 40             | 5              | 4                | 37                | 52              |
| 16848           | Lfng           | 333           | 29              | 99               | 38             | 74             | 6                | 40                | 28              |
| 16852           | Lgals1         | 148           | 1527            | 1087             | 5687           | 65             | 628              | 368               | 2312            |
| 16854           | Lgals3         | 26            | 29              | 49               | 95             | 34             | 82               | 317               | 625             |
| 16855           | Lgals4         | 18            | 319             | 270              | 2548           | 17             | 261              | 188               | 1899            |
| 16858           | Lgals7         | 9             | 8               | 49               | 140            | 9              | 3                | 32                | 67              |
| 16859           | Lgals9         | 236           | 172             | 592              | 4035           | 215            | 136              | 468               | 4299            |

| NCBI<br>Gene ID | Gene<br>Symbol | Affy.<br>CD4+ | Agilent<br>CD4+ | Illumina<br>CD4+ | Nimbl.<br>CD4+ | Affy.<br>CD19+ | Agilent<br>CD19+ | Illumina<br>CD19+ | Nimbl.<br>CD19+ |
|-----------------|----------------|---------------|-----------------|------------------|----------------|----------------|------------------|-------------------|-----------------|
| 16865           | Lgtn           | 54            | 332             | 135              | 526            | 55             | 354              | 138               | 536             |
| 16866           | Lhb            | 19            | 116             | 27               | 202            | 22             | 229              | 29                | 210             |
| 16867           | Lhcgr          | 5             | 3               | 25               | 18             | 5              | 3                | 29                | 24              |
| 16869           | Lhx1           | 7             | 36              | 27               | 20             | 6              | 36               | 28                | 58              |
| 16870           | Lhx2           | 14            | 6               | 34               | 63             | 14             | 4                | 35                | 64              |
| 16871           | Lhx3           | 12            | 14              | 44               | 68             | 11             | 17               | 37                | 112             |
| 16872           | Lhx4           | 27            | 37              | 24               | 23             | 25             | 32               | 19                | 26              |
| 16873           | Lhx5           | 6             | 2               | 22               | 43             | 6              | 4                | 27                | 64              |
| 16874           | Lhx6           | 11            | 13              | 31               | 22             | 12             | 19               | 32                | 30              |
| 16875           | Lhx8           | 8             | 2               | 25               | 38             | 6              | 3                | 25                | 63              |
| 16876           | Lhx9           | 6             | 6               | 21               | 18             | 6              | 6                | 27                | 21              |
| 16880           | Lifr           | 5             | 34              | 29               | 129            | 15             | 34               | 29                | 444             |
| 16881           | Lig1           | 42            | 647             | 166              | 228            | 60             | 919              | 249               | 293             |
| 16882           | Lig3           | 54            | 28              | 173              | 714            | 48             | 23               | 136               | 394             |
| 16885           | Limk1          | 48            | 244             | 185              | 220            | 42             | 163              | 136               | 196             |
| 16886           | Limk2          | 129           | 341             | 416              | 944            | 92             | 261              | 302               | 723             |
| 16890           | Lipe           | 41            | 67              | 145              | 173            | 65             | 163              | 280               | 280             |
| 16891           | Lipg           | 8             | 2               | 19               | 41             | 7              | 4                | 20                | 49              |
| 16898           | Rps2           | 2318          | 71837           | 16925            | 45983          | 2213           | 77133            | 16194             | 45638           |
| 16904           | Gzmm           | 9             | 31              | 48               | 192            | 8              | 19               | 37                | 158             |
| 16905           | Lmna           | 10            | 459             | 120              | 391            | 9              | 185              | 47                | 174             |
| 16906           | Lmnb1          | 79            | 46              | 34               | 292            | 83             | 44               | 31                | 234             |
| 16907           | Lmnb2          | 26            | 31              | 281              | 267            | 29             | 23               | 269               | 285             |
| 16909           | Lmo2           | 19            | 8               | 33               | 32             | 438            | 518              | 3666              | 7548            |
| 16911           | Lmo4           | 83            | 633             | 1460             | 1057           | 118            | 685              | 1918              | 1409            |
| 16912           | Psmb9          | 162           | 3522            | 2126             | 4117           | 159            | 4125             | 2098              | 4278            |
| 16913           | Psmb8          | 214           | 5015            | 5602             | 7749           | 213            | 6336             | 5895              | 7953            |
| 16917           | Lmx1b          | 26            | 24              | 42               | 33             | 24             | 36               | 39                | 34              |
| 16922           | Phyh           | 71            | 317             | 28               | 1203           | 101            | 385              | 26                | 1416            |
| 16924           | Lnx1           | 8             | 11              | 38               | 46             | 9              | 13               | 42                | 26              |
| 16939           | Lor            | 8             | 15              | 21               | 64             | 8              | 21               | 22                | 54              |
| 16948           | Lox            | 5             | 2               | 23               | 24             | 5              | 3                | 25                | 28              |
| 16949           | Loxl1          | 8             | 4               | 26               | 44             | 9              | 3                | 25                | 52              |
| 16950           | Loxl3          | 9             | 2               | 24               | 65             | 9              | 3                | 29                | 65              |
| 16952           | Anxa1          | 6             | 8               | 24               | 42             | 34             | 142              | 46                | 345             |
| 16956           | Lpl            | 6             | 4               | 30               | 39             | 7              | 9                | 32                | 35              |
| 16963           | Xcl1           | 8             | 4               | 65               | 146            | 7              | 5                | 29                | 24              |
| 16970           | Lrmp           | 54            | 850             | 809              | 3219           | 243            | 4902             | 3237              | 10199           |
| 16971           | Lrp1           | 10            | 32              | 53               | 45             | 12             | 29               | 50                | 61              |
| 16973           | Lrp5           | 20            | 68              | 42               | 58             | 14             | 36               | 33                | 43              |
| 16974           | Lrp6           | 121           | 19              | 42               | 135            | 91             | 7                | 38                | 89              |
| 16975           | Lrp8           | 27            | 15              | 84               | 56             | 11             | 8                | 34                | 42              |
| 16976           | Lrpap1         | 52            | 413             | 473              | 485            | 51             | 465              | 461               | 558             |
| 16978           | Lrrfip1        | 129           | 1039            | 108              | 2310           | 71             | 587              | 79                | 971             |
| 16979           | Lrrn1          | 4             | 3               | 28               | 22             | 4              | 3                | 29                | 22              |
| 16980           | Lrrn2          | 31            | 22              | 31               | 39             | 28             | 18               | 30                | 39              |
| 16981           | Lrrn3          | 6             | 3               | 27               | 31             | 8              | 4                | 29                | 38              |
| 16985           | Lsp1           | 640           | 1880            | 4198             | 17347          | 866            | 2721             | 5025              | 21049           |
| 16987           | Lss            | 27            | 77              | 160              | 315            | 21             | 39               | 101               | 225             |
| 16988           | Lst1           | 10            | 210             | 77               | 76             | 13             | 420              | 213               | 584             |
| 16992           | Lta            | 26            | 350             | 65               | 643            | 43             | 723              | 106               | 1464            |

| NCBI<br>Gene ID | Gene<br>Symbol | Affy.<br>CD4+ | Agilent<br>CD4+ | Illumina<br>CD4+ | Nimbl.<br>CD4+ | Affy.<br>CD19+ | Agilent<br>CD19+ | Illumina<br>CD19+ | Nimbl.<br>CD19+ |
|-----------------|----------------|---------------|-----------------|------------------|----------------|----------------|------------------|-------------------|-----------------|
| 16993           | Lta4h          | 94            | 514             | 230              | 2779           | 45             | 279              | 124               | 1068            |
| 16994           | Ltb            | 633           | 21826           | 809              | 11943          | 733            | 26295            | 833               | 12319           |
| 16995           | Ltb4r1         | 6             | 14              | 27               | 21             | 5              | 12               | 29                | 23              |
| 16997           | Ltbp2          | 10            | 11              | 30               | 31             | 12             | 7                | 31                | 36              |
| 16998           | Ltbp3          | 25            | 24              | 25               | 28             | 33             | 14               | 24                | 53              |
| 17000           | Ltbr           | 23            | 2               | 36               | 29             | 19             | 3                | 30                | 22              |
| 17001           | Ltc4s          | 12            | 7               | 21               | 170            | 10             | 6                | 30                | 126             |
| 17002           | Ltf            | 5             | 9               | 24               | 62             | 5              | 9                | 27                | 52              |
| 17005           | Ltk            | 16            | 8               | 20               | 48             | 22             | 66               | 130               | 248             |
| 17022           | Lum            | 4             | 8               | 20               | 20             | 4              | 10               | 23                | 27              |
| 17025           | Alad           | 45            | 182             | 378              | 106            | 92             | 407              | 926               | 319             |
| 17035           | Lxn            | 11            | 128             | 248              | 1078           | 8              | 78               | 130               | 740             |
| 17057           | Klrb1a         | 5             | 2               | 22               | 22             | 5              | 3                | 19                | 29              |
| 17060           | Blnk           | 7             | 10              | 28               | 85             | 451            | 18211            | 6318              | 14482           |
| 17068           | Ly6d           | 19            | 30              | 30               | 96             | 1533           | 43873            | 11651             | 36443           |
| 17069           | Ly6e           | 1150          | 1964            | 6648             | 7586           | 2395           | 4124             | 11587             | 14058           |
| 17071           | Ly6f           | 5             | 10              | 21               | 81             | 6              | 9                | 26                | 212             |
| 17075           | Tacstd1        | 12            | 18              | 23               | 495            | 19             | 59               | 22                | 912             |
| 17076           | Ly75           | 121           | 345             | 36               | 385            | 52             | 81               | 29                | 194             |
| 17082           | Il1rl1         | 5             | 34              | 37               | 20             | 5              | 15               | 34                | 23              |
| 17084           | Ly86           | 7             | 9               | 30               | 24             | 961            | 5040             | 3854              | 11838           |
| 17085           | Ly9            | 349           | 209             | 233              | 6675           | 401            | 265              | 207               | 5944            |
| 17086           | Ncr1           | 4             | 3               | 21               | 20             | 4              | 3                | 21                | 22              |
| 17087           | Ly96           | 5             | 35              | 74               | 264            | 10             | 209              | 301               | 1314            |
| 17089           | Lyar           | 81            | 585             | 321              | 4509           | 80             | 717              | 306               | 4204            |
| 17095           | Lyl1           | 27            | 31              | 28               | 63             | 221            | 10521            | 810               | 9909            |
| 17096           | Lyn            | 6             | 6               | 18               | 30             | 820            | 4628             | 16                | 4596            |
| 17101           | Lyst           | 187           | 425             | 36               | 102            | 299            | 625              | 36                | 108             |
| 17105           | Lyzs           | 5             | 12              | 28               | 41             | 5              | 81               | 25                | 106             |
| 17112           | Tm4sf1         | 5             | 25              | 21               | 89             | 5              | 33               | 24                | 89              |
| 17113           | M6pr           | 212           | 1919            | 2148             | 6529           | 243            | 1799             | 2150              | 5136            |
| 17116           | Mab2111        | 5             | 2               | 36               | 42             | 5              | 3                | 35                | 32              |
| 17117           | Amacr          | 11            | 173             | 19               | 155            | 9              | 166              | 18                | 171             |
| 17118           | Marcks         | 8             | 45              | 58               | 572            | 144            | 1238             | 825               | 8915            |
| 17120           | Mad1l1         | 86            | 145             | 59               | 81             | 75             | 133              | 55                | 62              |
| 17121           | Mxd3           | 16            | 17              | 23               | 62             | 14             | 42               | 28                | 47              |
| 17122           | Mxd4           | 144           | 533             | 112              | 280            | 143            | 552              | 148               | 662             |
| 17123           | Madcam1        | 6             | 23              | 31               | 68             | 6              | 25               | 25                | 103             |
| 17125           | Smad1          | 49            | 370             | 301              | 1835           | 26             | 153              | 130               | 666             |
| 17126           | Smad2          | 118           | 318             | 145              | 3292           | 119            | 300              | 160               | 2982            |
| 17127           | Smad3          | 165           | 174             | 1157             | 607            | 90             | 84               | 561               | 197             |
| 17128           | Smad4          | 386           | 2562            | 2219             | 6516           | 219            | 1218             | 1167              | 3364            |
| 17129           | Smad5          | 111           | 788             | 575              | 1948           | 70             | 525              | 360               | 1232            |
| 17130           | Smad6          | 11            | 11              | 32               | 31             | 11             | 15               | 31                | 32              |
| 17131           | Smad7          | 268           | 245             | 15               | 3270           | 72             | 45               | 19                | 962             |
| 17132           | Maf            | 26            | 679             | 66               | 1270           | 23             | 586              | 44                | 416             |
| 17133           | Maff           | 13            | 43              | 73               | 69             | 10             | 19               | 67                | 41              |
| 17134           | Mafg           | 29            | 64              | 140              | 105            | 33             | 115              | 218               | 163             |
| 17135           | Mafk           | 46            | 172             | 67               | 744            | 43             | 215              | 59                | 729             |
| 17136           | Mag            | 7             | 345             | 33               | 48             | 6              | 359              | 32                | 60              |
| 17137           | Magea1         | 4             | 2               | 27               | 22             | 4              | 3                | 31                | 28              |

| NCBI<br>Gene ID | Gene<br>Symbol | Affy.<br>CD4+ | Agilent<br>CD4+ | Illumina<br>CD4+ | Nimbl.<br>CD4+ | Affy.<br>CD19+ | Agilent<br>CD19+ | Illumina<br>CD19+ | Nimbl.<br>CD19+ |
|-----------------|----------------|---------------|-----------------|------------------|----------------|----------------|------------------|-------------------|-----------------|
| 17139           | Magea3         | 4             | 5               | 29               | 16             | 4              | 4                | 33                | 16              |
| 17140           | Magea4         | 6             | 2               | 30               | 26             | 5              | 2                | 26                | 29              |
| 17141           | Magea5         | 4             | 27              | 23               | 16             | 3              | 17               | 25                | 15              |
| 17145           | Mageb1         | 7             | 5               | 24               | 29             | 7              | 6                | 22                | 57              |
| 17149           | Magoh          | 188           | 1527            | 1234             | 7932           | 187            | 1394             | 1166              | 7116            |
| 17150           | Mfap2          | 20            | 41              | 35               | 68             | 22             | 45               | 35                | 45              |
| 17151           | Ccndbp1        | 54            | 1404            | 473              | 10229          | 57             | 1289             | 397               | 8983            |
| 17152           | Mak            | 5             | 3               | 33               | 25             | 5              | 4                | 28                | 24              |
| 17153           | Mal            | 11            | 12              | 32               | 23             | 11             | 9                | 33                | 20              |
| 17155           | Man1a          | 166           | 552             | 83               | 985            | 469            | 1532             | 223               | 1997            |
| 17158           | Man2a1         | 211           | 1243            | 496              | 2070           | 246            | 1376             | 592               | 2438            |
| 17159           | Man2b1         | 215           | 2010            | 2029             | 819            | 247            | 2103             | 2293              | 749             |
| 17160           | Man2b2         | 59            | 121             | 60               | 78             | 83             | 197              | 75                | 147             |
| 17161           | Maoa           | 5             | 6               | 24               | 32             | 5              | 3                | 20                | 28              |
| 17164           | Mapkapk2       | 90            | 233             | 270              | 1014           | 133            | 485              | 415               | 1444            |
| 17165           | Mapkapk5       | 94            | 707             | 22               | 4904           | 100            | 591              | 18                | 3993            |
| 17167           | Marco          | 8             | 52              | 32               | 37             | 7              | 53               | 30                | 98              |
| 17168           | Mare           | 63            | 65              | 55               | 806            | 69             | 60               | 60                | 978             |
| 17169           | Mark3          | 151           | 663             | 1003             | 5050           | 160            | 657              | 981               | 4177            |
| 17171           | Mas1           | 5             | 10              | 28               | 20             | 5              | 6                | 25                | 19              |
| 17172           | Ascl1          | 18            | 36              | 23               | 24             | 19             | 24               | 25                | 42              |
| 17173           | Ascl2          | 7             | 43              | 30               | 28             | 7              | 33               | 31                | 32              |
| 17174           | Masp1          | 6             | 5               | 25               | 37             | 6              | 6                | 29                | 31              |
| 17175           | Masp2          | 8             | 19              | 33               | 173            | 8              | 10               | 24                | 145             |
| 17178           | Fxyd3          | 12            | 5               | 21               | 30             | 11             | 6                | 23                | 33              |
| 17179           | Matk           | 36            | 193             | 113              | 456            | 33             | 149              | 92                | 387             |
| 17180           | Matn1          | 6             | 3               | 30               | 32             | 5              | 3                | 32                | 26              |
| 17181           | Matn2          | 6             | 11              | 33               | 35             | 6              | 5                | 32                | 47              |
| 17182           | Matn3          | 5             | 4               | 26               | 37             | 6              | 3                | 27                | 39              |
| 17183           | Matn4          | 6             | 9               | 35               | 18             | 6              | 9                | 38                | 22              |
| 17184           | Matr3          | 338           | 323             | 95               | 2915           | 323            | 282              | 71                | 1955            |
| 17187           | Max            | 198           | 1736            | 1359             | 7176           | 155            | 1126             | 1076              | 5124            |
| 17188           | Maz            | 182           | 73              | 48               | 95             | 154            | 50               | 36                | 98              |
| 17189           | Mb             | 13            | 9               | 26               | 63             | 12             | 9                | 27                | 80              |
| 17190           | Mbd1           | 104           | 801             | 104              | 1771           | 106            | 676              | 131               | 1285            |
| 17191           | Mbd2           | 656           | 324             | 22               | 11254          | 499            | 255              | 20                | 7384            |
| 17192           | Mbd3           | 152           | 168             | 173              | 547            | 158            | 192              | 146               | 521             |
| 17193           | Mbd4           | 30            | 67              | 72               | 252            | 68             | 301              | 201               | 783             |
| 17194           | Mbl1           | 5             | 3               | 20               | 37             | 5              | 2                | 21                | 59              |
| 17195           | Mbl2           | 20            | 3               | 35               | 26             | 18             | 3                | 32                | 31              |
| 17196           | Mbp            | 51            | 3096            | 1191             | 4447           | 27             | 718              | 365               | 974             |
| 17199           | Mc1r           | 18            | 29              | 26               | 33             | 17             | 14               | 24                | 33              |
| 17200           | Mc2r           | 5             | 85              | 27               | 55             | 5              | 81               | 30                | 80              |
| 17201           | Mc3r           | 7             | 126             | 26               | 82             | 8              | 137              | 26                | 54              |
| 17202           | Mc4r           | 7             | 37              | 22               | 44             | 7              | 60               | 18                | 31              |
| 17203           | Mc5r           | 6             | 3               | 25               | 32             | 6              | 3                | 26                | 29              |
| 17207           | Mcf2l          | 12            | 20              | 45               | 94             | 10             | 24               | 42                | 111             |
| 17210           | Mcl1           | 865           | 5065            | 4455             | 14836          | 1402           | 8910             | 6674              | 16450           |
| 17215           | Mcm3           | 57            | 749             | 85               | 1413           | 70             | 841              | 88                | 1794            |
| 17216           | Mcm2           | 85            | 425             | 293              | 353            | 81             | 310              | 254               | 172             |
| 17217           | Mcm4           | 93            | 2260            | 1622             | 3039           | 89             | 1769             | 1427              | 2306            |

| NCBI<br>Gene ID | Gene<br>Symbol | Affy.<br>CD4+ | Agilent<br>CD4+ | Illumina<br>CD4+ | Nimbl.<br>CD4+ | Affy.<br>CD19+ | Agilent<br>CD19+ | Illumina<br>CD19+ | Nimbl.<br>CD19+ |
|-----------------|----------------|---------------|-----------------|------------------|----------------|----------------|------------------|-------------------|-----------------|
| 17218           | Mcm5           | 72            | 547             | 671              | 1891           | 103            | 850              | 1102              | 3080            |
| 17219           | Mcm6           | 92            | 2610            | 640              | 968            | 99             | 2796             | 638               | 792             |
| 17220           | Mcm7           | 72            | 1593            | 466              | 1491           | 73             | 1800             | 436               | 1731            |
| 17222           | Anapc1         | 177           | 1588            | 827              | 1446           | 198            | 1775             | 808               | 1428            |
| 17224           | Mcpt1          | 4             | 4               | 19               | 32             | 4              | 6                | 19                | 38              |
| 17225           | Mcpt2          | 4             | 3               | 27               | 29             | 4              | 10               | 26                | 23              |
| 17227           | Mcpt4          | 5             | 16              | 20               | 41             | 5              | 13               | 19                | 56              |
| 17231           | Mcpt8          | 7             | 2               | 22               | 22             | 5              | 3                | 23                | 24              |
| 17237           | Mgrn1          | 117           | 1256            | 977              | 417            | 292            | 3387             | 2353              | 1192            |
| 17240           | Mdfi           | 18            | 7               | 39               | 35             | 18             | 9                | 39                | 38              |
| 17242           | Mdk            | 23            | 436             | 114              | 1076           | 14             | 263              | 49                | 502             |
| 17245           | Mdm1           | 13            | 48              | 56               | 88             | 16             | 64               | 74                | 107             |
| 17246           | Mdm2           | 112           | 457             | 1274             | 2406           | 110            | 393              | 1404              | 1772            |
| 17248           | Mdm4           | 303           | 444             | 158              | 681            | 266            | 355              | 135               | 444             |
| 17250           | Abcc1          | 67            | 224             | 22               | 925            | 64             | 230              | 26                | 778             |
| 17251           | Mds1           | 7             | 2               | 23               | 70             | 6              | 3                | 23                | 38              |
| 17252           | Rdh11          | 26            | 261             | 388              | 1770           | 32             | 379              | 523               | 1609            |
| 17254           | Slc3a2         | 277           | 1326            | 63               | 5842           | 306            | 1321             | 67                | 4908            |
| 17256           | Mea1           | 86            | 812             | 939              | 9653           | 82             | 1213             | 1035              | 9763            |
| 17257           | Mecp2          | 86            | 238             | 252              | 2418           | 72             | 181              | 209               | 1816            |
| 17258           | Mef2a          | 208           | 152             | 172              | 1183           | 224            | 175              | 191               | 1016            |
| 17259           | Mef2b          | 26            | 64              | 25               | 184            | 25             | 129              | 30                | 3127            |
| 17260           | Mef2c          | 8             | 2               | 39               | 47             | 464            | 1070             | 1718              | 7180            |
| 17261           | Mef2d          | 344           | 4345            | 40               | 3302           | 422            | 6132             | 38                | 4286            |
| 17263           | Gtl2           | 11            | 15              | 39               | 65             | 9              | 7                | 40                | 94              |
| 17268           | Meis1          | 6             | 2               | 33               | 52             | 7              | 3                | 31                | 60              |
| 17274           | Rab8a          | 377           | 253             | 246              | 1396           | 322            | 308              | 205               | 1947            |
| 17279           | Melk           | 8             | 10              | 27               | 104            | 8              | 23               | 30                | 110             |
| 17281           | Fyco1          | 87            | 202             | 363              | 788            | 78             | 152              | 315               | 478             |
| 17283           | Men1           | 81            | 126             | 309              | 810            | 84             | 140              | 285               | 875             |
| 17285           | Meox1          | 5             | 12              | 26               | 39             | 5              | 11               | 32                | 37              |
| 17286           | Meox2          | 6             | 4               | 28               | 25             | 5              | 3                | 31                | 31              |
| 17287           | Mep1a          | 4             | 103             | 21               | 24             | 4              | 83               | 21                | 35              |
| 17288           | Mep1b          | 6             | 2               | 40               | 26             | 6              | 3                | 36                | 22              |
| 17289           | Mertk          | 5             | 3               | 32               | 22             | 6              | 4                | 34                | 18              |
| 17292           | Mesp1          | 7             | 12              | 26               | 66             | 7              | 13               | 24                | 77              |
| 17293           | Mesp2          | 10            | 19              | 36               | 37             | 11             | 17               | 29                | 41              |
| 17294           | Mest           | 7             | 2               | 31               | 68             | 7              | 6                | 27                | 85              |
| 17295           | Met            | 4             | 37              | 27               | 19             | 4              | 46               | 25                | 23              |
| 17299           | Mettl1         | 46            | 15              | 147              | 826            | 53             | 19               | 153               | 826             |
| 17300           | Foxc1          | 5             | 2               | 22               | 28             | 7              | 3                | 18                | 28              |
| 17301           | Foxd2          | 17            | 22              | 33               | 79             | 17             | 18               | 28                | 99              |
| 17304           | Mfge8          | 39            | 1609            | 169              | 439            | 23             | 717              | 84                | 201             |
| 17305           | Mfng           | 179           | 1645            | 1022             | 977            | 125            | 979              | 630               | 654             |
| 17308           | Mgat1          | 46            | 653             | 72               | 762            | 111            | 2085             | 197               | 1635            |
| 17309           | Mgat3          | 8             | 4               | 24               | 33             | 8              | 6                | 26                | 28              |
| 17311           | Kitl           | 4             | 3               | 23               | 23             | 4              | 5                | 24                | 24              |
| 17312           | Mgl1           | 6             | 3               | 21               | 47             | 6              | 3                | 22                | 44              |
| 17314           | Mgmt           | 14            | 42              | 136              | 159            | 13             | 48               | 104               | 140             |
| 17318           | Mid1           | 29            | 366             | 36               | 75             | 17             | 385              | 38                | 70              |
| 17329           | Cxcl9          | 5             | 4               | 31               | 27             | 6              | 5                | 32                | 34              |



| NCBI<br>Gene ID | Gene<br>Symbol | Affy.<br>CD4+ | Agilent<br>CD4+ | Illumina<br>CD4+ | Nimbl.<br>CD4+ | Affy.<br>CD19+ | Agilent<br>CD19+ | Illumina<br>CD19+ | Nimbl.<br>CD19+ |
|-----------------|----------------|---------------|-----------------|------------------|----------------|----------------|------------------|-------------------|-----------------|
| 17330           | Minpp1         | 37            | 393             | 224              | 580            | 17             | 204              | 143               | 243             |
| 17339           | Mip            | 8             | 3               | 34               | 57             | 7              | 4                | 37                | 45              |
| 17342           | Mitf           | 10            | 10              | 169              | 32             | 6              | 3                | 73                | 42              |
| 17346           | Mknk1          | 126           | 673             | 682              | 1257           | 122            | 694              | 605               | 1307            |
| 17347           | Mknk2          | 320           | 10565           | 2346             | 154            | 483            | 17393            | 3121              | 173             |
| 17349           | Mlf1           | 5             | 3               | 25               | 26             | 4              | 5                | 20                | 29              |
| 17350           | Mlh1           | 39            | 423             | 518              | 2350           | 41             | 470              | 578               | 2653            |
| 17354           | Mllt10         | 222           | 61              | 57               | 2710           | 217            | 54               | 61                | 2371            |
| 17364           | Trpm1          | 6             | 9               | 39               | 56             | 5              | 4                | 36                | 21              |
| 17380           | Mme            | 4             | 10              | 30               | 26             | 5              | 6                | 29                | 37              |
| 17381           | Mmp12          | 6             | 2               | 25               | 25             | 5              | 3                | 19                | 29              |
| 17384           | Mmp10          | 6             | 12              | 46               | 29             | 7              | 13               | 41                | 23              |
| 17385           | Mmp11          | 13            | 50              | 48               | 303            | 13             | 44               | 39                | 125             |
| 17386           | Mmp13          | 6             | 2               | 26               | 23             | 6              | 3                | 31                | 18              |
| 17387           | Mmp14          | 11            | 10              | 61               | 78             | 8              | 4                | 35                | 58              |
| 17388           | Mmp15          | 11            | 4               | 32               | 67             | 12             | 3                | 29                | 89              |
| 17389           | Mmp16          | 5             | 3               | 22               | 58             | 5              | 3                | 26                | 106             |
| 17390           | Mmp2           | 13            | 3               | 25               | 22             | 13             | 4                | 25                | 24              |
| 17391           | Mmp24          | 17            | 21              | 620              | 25             | 16             | 15               | 563               | 26              |
| 17392           | Mmp3           | 5             | 5               | 32               | 16             | 5              | 3                | 31                | 26              |
| 17393           | Mmp7           | 9             | 13              | 20               | 17             | 8              | 16               | 18                | 21              |
| 17394           | Mmp8           | 5             | 2               | 22               | 26             | 5              | 3                | 20                | 30              |
| 17395           | Mmp9           | 8             | 5               | 39               | 61             | 8              | 5                | 38                | 36              |
| 17420           | Mnat1          | 34            | 161             | 232              | 17             | 28             | 144              | 175               | 16              |
| 17423           | Ndst2          | 65            | 214             | 308              | 610            | 85             | 315              | 378               | 1205            |
| 17425           | Foxk1          | 218           | 56              | 2175             | 346            | 152            | 57               | 1541              | 233             |
| 17427           | Mns1           | 15            | 271             | 257              | 854            | 13             | 185              | 152               | 521             |
| 17428           | Mnt            | 64            | 1119            | 54               | 649            | 66             | 1229             | 47                | 598             |
| 17433           | Mobp           | 7             | 59              | 25               | 88             | 7              | 55               | 27                | 66              |
| 17434           | Mocs2          | 32            | 495             | 293              | 661            | 28             | 448              | 221               | 491             |
| 17436           | Mod1           | 7             | 3               | 19               | 157            | 7              | 3                | 25                | 143             |
| 17441           | Mog            | 14            | 3               | 26               | 20             | 12             | 4                | 28                | 31              |
| 17444           | Grap2          | 649           | 1580            | 133              | 1451           | 266            | 332              | 89                | 328             |
| 17448           | Mdh2           | 354           | 15158           | 529              | 5052           | 310            | 12470            | 390               | 3452            |
| 17449           | Mdh1           | 212           | 2476            | 154              | 1935           | 284            | 2780             | 160               | 2227            |
| 17451           | Mos            | 6             | 5               | 22               | 59             | 6              | 5                | 21                | 98              |
| 17454           | Mov10          | 111           | 661             | 136              | 188            | 70             | 450              | 83                | 71              |
| 17463           | Psmd7          | 66            | 641             | 877              | 2889           | 68             | 626              | 908               | 3320            |
| 17470           | Cd200          | 19            | 166             | 200              | 1343           | 57             | 536              | 332               | 3362            |
| 17472           | Gbp4           | 284           | 159             | 185              | 853            | 112            | 975              | 846               | 3137            |
| 17475           | Mpdz           | 5             | 9               | 28               | 38             | 5              | 9                | 29                | 53              |
| 17476           | Mpeg1          | 7             | 25              | 21               | 31             | 41             | 384              | 405               | 1216            |
| 17480           | Mpl            | 10            | 15              | 25               | 40             | 12             | 38               | 28                | 53              |
| 17523           | Mpo            | 7             | 49              | 29               | 132            | 7              | 25               | 30                | 188             |
| 17524           | Mpp1           | 62            | 609             | 268              | 2471           | 65             | 684              | 247               | 1878            |
| 17528           | Mpz            | 17            | 24              | 22               | 37             | 16             | 20               | 23                | 46              |
| 17532           | Mras           | 9             | 16              | 27               | 172            | 9              | 25               | 27                | 159             |
| 17533           | Mrc1           | 6             | 2               | 23               | 45             | 7              | 15               | 44                | 74              |
| 17534           | Mrc2           | 7             | 4               | 35               | 96             | 8              | 7                | 39                | 147             |
| 17535           | Mre11a         | 69            | 145             | 253              | 2102           | 73             | 178              | 259               | 1892            |
| 17536           | Mrg1           | 5             | 6               | 25               | 43             | 5              | 9                | 26                | 50              |

| NCBI<br>Gene ID | Gene<br>Symbol | Affy.<br>CD4+ | Agilent<br>CD4+ | Illumina<br>CD4+ | Nimbl.<br>CD4+ | Affy.<br>CD19+ | Agilent<br>CD19+ | Illumina<br>CD19+ | Nimbl.<br>CD19+ |
|-----------------|----------------|---------------|-----------------|------------------|----------------|----------------|------------------|-------------------|-----------------|
| 17537           | Mrg2           | 50            | 82              | 100              | 134            | 23             | 18               | 35                | 65              |
| 17540           | Mrvi1          | 15            | 28              | 104              | 108            | 16             | 13               | 82                | 59              |
| 17681           | Msc            | 7             | 2               | 34               | 28             | 8              | 4                | 33                | 26              |
| 17684           | Cited2         | 313           | 696             | 1081             | 840            | 168            | 273              | 582               | 430             |
| 17685           | Msh2           | 99            | 1604            | 197              | 510            | 64             | 1177             | 125               | 328             |
| 17686           | Msh3           | 108           | 399             | 185              | 1685           | 103            | 376              | 228               | 1379            |
| 17687           | Msh5           | 12            | 5               | 49               | 66             | 12             | 15               | 55                | 64              |
| 17688           | Msh6           | 91            | 1204            | 1209             | 3492           | 66             | 832              | 986               | 2456            |
| 17691           | Snf1lk         | 176           | 53              | 37               | 1362           | 311            | 208              | 48                | 2926            |
| 17692           | Msl31          | 83            | 316             | 37               | 1290           | 107            | 456              | 48                | 1698            |
| 17695           | Msemb          | 5             | 4               | 27               | 22             | 4              | 3                | 24                | 21              |
| 17698           | Msn            | 887           | 664             | 3633             | 4093           | 874            | 454              | 3924              | 2531            |
| 17701           | Msx1           | 10            | 95              | 34               | 68             | 11             | 92               | 29                | 75              |
| 17702           | Msx2           | 7             | 5               | 44               | 30             | 7              | 7                | 35                | 36              |
| 17703           | Msx3           | 13            | 3               | 96               | 30             | 14             | 5                | 149               | 31              |
| 17713           | Grpel1         | 56            | 1550            | 54               | 7246           | 64             | 1495             | 57                | 7280            |
| 17714           | Grpel2         | 66            | 131             | 204              | 199            | 94             | 284              | 416               | 225             |
| 17748           | Mt1            | 8             | 67              | 25               | 115            | 10             | 59               | 78                | 227             |
| 17749           | Polr2k         | 100           | 611             | 239              | 8946           | 110            | 724              | 301               | 9314            |
| 17750           | Mt2            | 5             | 69              | 50               | 344            | 5              | 40               | 53                | 418             |
| 17751           | Mt3            | 32            | 269             | 26               | 49             | 31             | 382              | 24                | 58              |
| 17752           | Mt4            | 7             | 59              | 35               | 137            | 7              | 43               | 37                | 146             |
| 17755           | Mtap1b         | 6             | 2               | 38               | 18             | 7              | 3                | 40                | 17              |
| 17756           | Mtap2          | 5             | 3               | 29               | 34             | 5              | 5                | 28                | 40              |
| 17758           | Mtap4          | 89            | 641             | 37               | 3182           | 78             | 400              | 39                | 2877            |
| 17760           | Mtap6          | 10            | 100             | 34               | 119            | 8              | 117              | 32                | 137             |
| 17761           | Mtap7          | 21            | 79              | 879              | 1235           | 18             | 76               | 1082              | 1159            |
| 17762           | Mapt           | 12            | 13              | 32               | 42             | 11             | 9                | 35                | 39              |
| 17763           | Mtcp1          | 15            | 138             | 56               | 2271           | 18             | 174              | 49                | 2667            |
| 17764           | Mtf1           | 60            | 112             | 85               | 1736           | 62             | 92               | 103               | 2678            |
| 17765           | Mtf2           | 144           | 504             | 768              | 4254           | 143            | 612              | 816               | 3887            |
| 17768           | Mthfd2         | 56            | 223             | 839              | 5006           | 30             | 83               | 341               | 1801            |
| 17769           | Mthfr          | 28            | 250             | 24               | 162            | 20             | 144              | 25                | 127             |
| 17771           | Mtl5           | 10            | 10              | 27               | 36             | 8              | 10               | 27                | 46              |
| 17772           | Mtm1           | 11            | 70              | 30               | 1073           | 17             | 89               | 29                | 1903            |
| 17773           | Mtnr1a         | 5             | 2               | 29               | 37             | 4              | 4                | 27                | 52              |
| 17775           | Laptm4a        | 247           | 1016            | 539              | 11916          | 316            | 1005             | 643               | 11007           |
| 17776           | Mast2          | 63            | 389             | 682              | 145            | 64             | 427              | 666               | 107             |
| 17777           | Mttp           | 8             | 3               | 32               | 31             | 8              | 4                | 30                | 23              |
| 17826           | Mtvr2          | 114           | 354             | 672              | 2235           | 83             | 212              | 384               | 1599            |
| 17827           | Mtx1           | 67            | 1801            | 1003             | 898            | 81             | 2246             | 1047              | 909             |
| 17828           | Muted          | 23            | 114             | 253              | 3330           | 24             | 193              | 394               | 5567            |
| 17829           | Muc1           | 5             | 24              | 35               | 35             | 5              | 22               | 38                | 54              |
| 17830           | Muc10          | 4             | 2               | 24               | 36             | 4              | 7                | 24                | 44              |
| 17836           | Mug1           | 5             | 10              | 29               | 16             | 5              | 16               | 28                | 17              |
| 17837           | Mug2           | 7             | 13              | 21               | 29             | 8              | 15               | 20                | 24              |
| 17841           | Mup1           | 4             | 2               | 33               | 69             | 5              | 3                | 29                | 105             |
| 17842           | Mup3           | 4             | 43              | 23               | 49             | 4              | 45               | 19                | 60              |
| 17843           | Mup4           | 4             | 37              | 25               | 80             | 5              | 26               | 28                | 86              |
| 17844           | Mup5           | 4             | 6               | 18               | 23             | 4              | 9                | 23                | 18              |
| 17846           | Commd1         | 21            | 375             | 423              | 61             | 21             | 584              | 591               | 85              |

| NCBI<br>Gene ID | Gene<br>Symbol | Affy.<br>CD4+ | Agilent<br>CD4+ | Illumina<br>CD4+ | Nimbl.<br>CD4+ | Affy.<br>CD19+ | Agilent<br>CD19+ | Illumina<br>CD19+ | Nimbl.<br>CD19+ |
|-----------------|----------------|---------------|-----------------|------------------|----------------|----------------|------------------|-------------------|-----------------|
| 17850           | Mut            | 58            | 607             | 27               | 895            | 47             | 463              | 28                | 778             |
| 17855           | Mvk            | 36            | 53              | 45               | 759            | 27             | 36               | 35                | 489             |
| 17858           | Mx2            | 7             | 77              | 52               | 86             | 8              | 209              | 80                | 199             |
| 17859           | Mxi1           | 24            | 130             | 111              | 929            | 17             | 89               | 79                | 619             |
| 17863           | Myb            | 83            | 770             | 91               | 415            | 62             | 578              | 59                | 210             |
| 17864           | Mybl1          | 4             | 2               | 26               | 47             | 5              | 3                | 27                | 19              |
| 17865           | Mybl2          | 21            | 51              | 35               | 54             | 21             | 79               | 35                | 99              |
| 17868           | Mybpc3         | 15            | 25              | 40               | 37             | 14             | 46               | 37                | 51              |
| 17869           | Myc            | 193           | 1254            | 59               | 5717           | 211            | 1332             | 58                | 5104            |
| 17870           | Mycs           | 9             | 15              | 27               | 70             | 10             | 17               | 25                | 61              |
| 17872           | Myd116         | 105           | 1028            | 811              | 3985           | 77             | 563              | 541               | 2561            |
| 17873           | Gadd45b        | 56            | 279             | 64               | 1391           | 73             | 447              | 81                | 3055            |
| 17874           | Myd88          | 108           | 941             | 329              | 6821           | 80             | 528              | 204               | 3634            |
| 17876           | Myef2          | 29            | 290             | 67               | 344            | 35             | 396              | 76                | 369             |
| 17877           | Myf5           | 6             | 3               | 27               | 34             | 6              | 3                | 30                | 20              |
| 17878           | Myf6           | 5             | 9               | 29               | 65             | 5              | 13               | 28                | 71              |
| 17879           | Myh1           | 5             | 21              | 33               | 30             | 6              | 24               | 33                | 34              |
| 17880           | Myh11          | 11            | 12              | 27               | 121            | 10             | 15               | 26                | 97              |
| 17882           | Myh2           | 10            | 7               | 22               | 51             | 10             | 6                | 24                | 42              |
| 17884           | Myh4           | 7             | 6               | 24               | 30             | 7              | 5                | 21                | 31              |
| 17886           | Myh9           | 921           | 36999           | 9662             | 6432           | 632            | 26524            | 6109              | 3637            |
| 17888           | Myh6           | 6             | 3               | 29               | 71             | 6              | 4                | 29                | 104             |
| 17896           | Myl4           | 17            | 72              | 85               | 1009           | 29             | 396              | 738               | 5618            |
| 17897           | Myl3           | 10            | 67              | 24               | 38             | 11             | 54               | 25                | 58              |
| 17898           | Myl7           | 10            | 3               | 29               | 54             | 11             | 6                | 37                | 92              |
| 17901           | Myl1           | 6             | 2               | 27               | 68             | 5              | 4                | 26                | 81              |
| 17904           | Myl6           | 589           | 35837           | 5185             | 25472          | 390            | 25625            | 3002              | 20655           |
| 17906           | Myl2           | 6             | 4               | 24               | 28             | 6              | 3                | 23                | 34              |
| 17907           | Mylpf          | 17            | 147             | 230              | 2266           | 12             | 56               | 94                | 873             |
| 17909           | Myo10          | 84            | 32              | 40               | 321            | 17             | 5                | 33                | 61              |
| 17910           | Myo15          | 7             | 3               | 22               | 79             | 7              | 3                | 24                | 69              |
| 17912           | Myo1b          | 5             | 2               | 30               | 52             | 6              | 5                | 30                | 155             |
| 17913           | Myo1c          | 24            | 40              | 32               | 372            | 488            | 1272             | 243               | 6589            |
| 17916           | Myo1f          | 12            | 47              | 76               | 445            | 24             | 122              | 124               | 1009            |
| 17918           | Myo5a          | 28            | 60              | 46               | 60             | 161            | 452              | 157               | 358             |
| 17919           | Myo5b          | 7             | 12              | 31               | 41             | 7              | 4                | 26                | 31              |
| 17920           | Myo6           | 7             | 303             | 407              | 385            | 7              | 34               | 52                | 56              |
| 17921           | Myo7a          | 15            | 7               | 28               | 78             | 30             | 115              | 108               | 450             |
| 17922           | Myo7b          | 8             | 31              | 34               | 42             | 9              | 25               | 34                | 48              |
| 17925           | Myo9b          | 260           | 3910            | 1894             | 467            | 197            | 2584             | 1271              | 367             |
| 17926           | Myoc           | 4             | 23              | 27               | 43             | 5              | 19               | 26                | 31              |
| 17927           | Myod1          | 12            | 84              | 22               | 79             | 13             | 71               | 21                | 47              |
| 17928           | Myog           | 11            | 45              | 33               | 35             | 10             | 35               | 28                | 47              |
| 17929           | Myom1          | 7             | 5               | 24               | 61             | 7              | 4                | 27                | 38              |
| 17930           | Myom2          | 6             | 11              | 83               | 30             | 6              | 8                | 77                | 24              |
| 17931           | Ppp1r12a       | 255           | 916             | 300              | 10023          | 235            | 579              | 130               | 8096            |
| 17932           | Myt1           | 7             | 14              | 26               | 25             | 7              | 10               | 25                | 21              |
| 17933           | Myt1l          | 6             | 6               | 24               | 22             | 6              | 3                | 30                | 25              |
| 17936           | Nab1           | 118           | 682             | 307              | 2634           | 103            | 453              | 233               | 1878            |
| 17937           | Nab2           | 188           | 48              | 119              | 167            | 124            | 26               | 75                | 73              |
| 17938           | Naca           | 576           | 7419            | 1496             | 7160           | 528            | 6510             | 1331              | 7428            |

| NCBI<br>Gene ID | Gene<br>Symbol | Affy.<br>CD4+ | Agilent<br>CD4+ | Illumina<br>CD4+ | Nimbl.<br>CD4+ | Affy.<br>CD19+ | Agilent<br>CD19+ | Illumina<br>CD19+ | Nimbl.<br>CD19+ |
|-----------------|----------------|---------------|-----------------|------------------|----------------|----------------|------------------|-------------------|-----------------|
| 17939           | Naga           | 63            | 42              | 59               | 251            | 58             | 38               | 51                | 151             |
| 17954           | Nap1l2         | 4             | 3               | 22               | 20             | 4              | 3                | 26                | 21              |
| 17955           | Nap1l4         | 356           | 10742           | 4021             | 8829           | 246            | 6432             | 2487              | 6174            |
| 17957           | Napb           | 5             | 15              | 33               | 98             | 5              | 9                | 30                | 75              |
| 17960           | Nat1           | 4             | 2               | 24               | 17             | 4              | 3                | 19                | 16              |
| 17961           | Nat2           | 10            | 141             | 20               | 1596           | 13             | 186              | 24                | 1544            |
| 17962           | Nat3           | 4             | 2               | 21               | 15             | 4              | 3                | 24                | 20              |
| 17965           | Nbl1           | 9             | 52              | 26               | 45             | 10             | 63               | 29                | 40              |
| 17966           | Nbr1           | 150           | 1291            | 153              | 1427           | 146            | 1013             | 152               | 1221            |
| 17967           | Ncam1          | 8             | 112             | 26               | 39             | 7              | 131              | 24                | 62              |
| 17968           | Ncam2          | 4             | 3               | 26               | 38             | 4              | 5                | 28                | 41              |
| 17969           | Ncf1           | 25            | 23              | 19               | 62             | 417            | 413              | 43                | 2558            |
| 17970           | Ncf2           | 34            | 8               | 46               | 42             | 87             | 1129             | 3325              | 1209            |
| 17972           | Ncf4           | 30            | 1028            | 405              | 453            | 194            | 8229             | 2153              | 2189            |
| 17973           | Nck1           | 72            | 391             | 29               | 2461           | 62             | 301              | 29                | 1545            |
| 17974           | Nck2           | 81            | 345             | 804              | 1473           | 25             | 110              | 357               | 606             |
| 17975           | Ncl            | 369           | 3689            | 434              | 4261           | 384            | 4188             | 509               | 3837            |
| 17977           | Ncoa1          | 69            | 594             | 388              | 536            | 87             | 688              | 457               | 736             |
| 17978           | Ncoa2          | 235           | 140             | 147              | 867            | 137            | 50               | 80                | 320             |
| 17979           | Ncoa3          | 318           | 812             | 114              | 3102           | 352            | 825              | 126               | 4098            |
| 17984           | Ndn            | 5             | 47              | 30               | 17             | 6              | 49               | 28                | 17              |
| 17986           | Ndph           | 5             | 4               | 22               | 18             | 5              | 4                | 25                | 27              |
| 17988           | Ndrp1          | 50            | 251             | 146              | 867            | 45             | 158              | 97                | 566             |
| 17991           | Ndufa2         | 87            | 2671            | 2042             | 5632           | 80             | 2744             | 1887              | 6648            |
| 17992           | Ndufa4         | 253           | 2365            | 2701             | 10466          | 260            | 2622             | 2646              | 11097           |
| 17993           | Ndufs4         | 165           | 1635            | 1487             | 8610           | 126            | 1144             | 1297              | 8094            |
| 17995           | Ndufv1         | 99            | 1801            | 1675             | 4776           | 100            | 1781             | 1653              | 4408            |
| 17996           | Neb            | 12            | 12              | 19               | 124            | 7              | 4                | 22                | 64              |
| 17997           | Nedd1          | 53            | 77              | 388              | 1224           | 54             | 76               | 456               | 1783            |
| 17999           | Nedd4          | 25            | 23              | 41               | 110            | 185            | 251              | 57                | 804             |
| 18000           | 2-Sep          | 124           | 1256            | 21               | 7700           | 158            | 1491             | 22                | 7717            |
| 18002           | Nedd8          | 195           | 2136            | 1297             | 13764          | 245            | 2597             | 1371              | 14081           |
| 18003           | Nedd9          | 251           | 314             | 1161             | 2879           | 549            | 500              | 2033              | 4394            |
| 18004           | Nek1           | 40            | 101             | 151              | 1694           | 30             | 82               | 147               | 1327            |
| 18005           | Nek2           | 8             | 3               | 24               | 84             | 11             | 24               | 24                | 142             |
| 18007           | Neo1           | 5             | 31              | 30               | 24             | 5              | 45               | 32                | 49              |
| 18008           | Nes            | 5             | 104             | 28               | 72             | 4              | 112              | 24                | 71              |
| 18010           | Neu1           | 81            | 2277            | 718              | 1555           | 68             | 1701             | 495               | 989             |
| 18011           | Neur1          | 20            | 22              | 25               | 36             | 19             | 12               | 25                | 29              |
| 18012           | Neurod1        | 5             | 2               | 31               | 17             | 4              | 3                | 33                | 26              |
| 18013           | Neurod2        | 16            | 9               | 25               | 82             | 15             | 15               | 27                | 111             |
| 18014           | Neurog1        | 9             | 65              | 39               | 37             | 9              | 56               | 36                | 41              |
| 18015           | Nf1            | 38            | 10              | 26               | 202            | 75             | 15               | 42                | 569             |
| 18016           | Nf2            | 69            | 113             | 681              | 2681           | 65             | 104              | 720               | 2637            |
| 18018           | Nfatc1         | 164           | 434             | 1518             | 5179           | 236            | 389              | 1577              | 7696            |
| 18019           | Nfatc2         | 120           | 65              | 29               | 4072           | 56             | 54               | 28                | 1452            |
| 18020           | Nfatc2ip       | 40            | 443             | 161              | 5431           | 43             | 436              | 141               | 6050            |
| 18021           | Nfatc3         | 444           | 790             | 2387             | 2354           | 402            | 427              | 2443              | 1680            |
| 18022           | Nfe2           | 8             | 4               | 20               | 40             | 8              | 3                | 26                | 24              |
| 18023           | Nfe2l1         | 101           | 885             | 720              | 1887           | 139            | 1220             | 878               | 2881            |
| 18024           | Nfe2l2         | 153           | 1065            | 80               | 867            | 127            | 653              | 59                | 597             |

| NCBI<br>Gene ID | Gene<br>Symbol | Affy.<br>CD4+ | Agilent<br>CD4+ | Illumina<br>CD4+ | Nimbl.<br>CD4+ | Affy.<br>CD19+ | Agilent<br>CD19+ | Illumina<br>CD19+ | Nimbl.<br>CD19+ |
|-----------------|----------------|---------------|-----------------|------------------|----------------|----------------|------------------|-------------------|-----------------|
| 18025           | Nfe2l3         | 22            | 84              | 24               | 51             | 22             | 71               | 25                | 41              |
| 18027           | Nfia           | 14            | 20              | 28               | 544            | 11             | 15               | 34                | 226             |
| 18028           | Nfib           | 4             | 11              | 29               | 51             | 5              | 8                | 30                | 65              |
| 18029           | Nfic           | 44            | 396             | 60               | 199            | 42             | 335              | 46                | 246             |
| 18030           | Nfil3          | 7             | 33              | 73               | 99             | 8              | 11               | 45                | 67              |
| 18032           | Nfix           | 44            | 89              | 174              | 726            | 21             | 17               | 37                | 166             |
| 18033           | Nfkb1          | 302           | 364             | 1199             | 5745           | 372            | 462              | 1400              | 6944            |
| 18034           | Nfkb2          | 115           | 367             | 146              | 150            | 404            | 1748             | 567               | 573             |
| 18035           | Nfkbia         | 483           | 7035            | 331              | 4323           | 453            | 10245            | 352               | 4857            |
| 18036           | Nfkbib         | 133           | 653             | 53               | 369            | 166            | 1017             | 73                | 432             |
| 18037           | Nfkbie         | 70            | 329             | 124              | 530            | 209            | 1361             | 430               | 2079            |
| 18038           | Nfkbil1        | 41            | 151             | 56               | 176            | 41             | 181              | 58                | 227             |
| 18039           | Nefl           | 5             | 2               | 22               | 20             | 6              | 6                | 23                | 20              |
| 18041           | Nfs1           | 63            | 547             | 72               | 1245           | 74             | 658              | 75                | 1353            |
| 18044           | Nfya           | 99            | 539             | 209              | 88             | 120            | 590              | 279               | 99              |
| 18045           | Nfyb           | 78            | 837             | 559              | 9928           | 89             | 753              | 656               | 9333            |
| 18046           | Nfyc           | 145           | 121             | 25               | 647            | 150            | 130              | 24                | 482             |
| 18049           | Ngfb           | 7             | 4               | 25               | 50             | 7              | 3                | 24                | 46              |
| 18053           | Ngfr           | 22            | 54              | 26               | 46             | 25             | 126              | 107               | 48              |
| 18054           | Ngp            | 6             | 2               | 27               | 52             | 5              | 2                | 24                | 45              |
| 18071           | Nhlh1          | 6             | 2               | 20               | 33             | 6              | 3                | 20                | 34              |
| 18072           | Nhlh2          | 6             | 2               | 33               | 21             | 7              | 3                | 29                | 23              |
| 18073           | Nid1           | 9             | 2               | 31               | 30             | 27             | 120              | 90                | 205             |
| 18074           | Nid2           | 8             | 2               | 27               | 31             | 7              | 3                | 28                | 39              |
| 18080           | Nin            | 79            | 206             | 439              | 1264           | 63             | 184              | 380               | 999             |
| 18081           | Ninj1          | 28            | 83              | 29               | 440            | 29             | 97               | 27                | 607             |
| 18082           | Nipsnap1       | 54            | 167             | 397              | 2789           | 48             | 154              | 334               | 1909            |
| 18087           | Nktr           | 239           | 652             | 410              | 6239           | 187            | 500              | 349               | 5251            |
| 18088           | Nkx2-2         | 10            | 4               | 26               | 64             | 10             | 7                | 25                | 46              |
| 18089           | Nkx2-3         | 19            | 13              | 30               | 67             | 17             | 11               | 30                | 70              |
| 18091           | Nkx2-5         | 26            | 14              | 31               | 54             | 26             | 15               | 36                | 61              |
| 18092           | Nkx2-6         | 14            | 35              | 21               | 43             | 16             | 25               | 19                | 44              |
| 18094           | Nkx2-9         | 11            | 2               | 22               | 100            | 9              | 3                | 22                | 69              |
| 18095           | Nkx3-1         | 7             | 2               | 23               | 31             | 7              | 3                | 27                | 44              |
| 18096           | Nkx6-1         | 10            | 46              | 25               | 163            | 11             | 48               | 23                | 120             |
| 18099           | Nlk            | 284           | 621             | 871              | 12534          | 93             | 113              | 305               | 4819            |
| 18100           | Mrpl40         | 98            | 780             | 585              | 1871           | 97             | 775              | 572               | 2081            |
| 18101           | Nmbr           | 6             | 2               | 16               | 57             | 6              | 2                | 23                | 52              |
| 18102           | Nme1           | 109           | 781             | 3391             | 18787          | 114            | 1033             | 3388              | 19678           |
| 18103           | Nme2           | 273           | 9608            | 2661             | 34263          | 251            | 8177             | 2167              | 33269           |
| 18104           | Nqo1           | 6             | 5               | 25               | 224            | 5              | 4                | 32                | 86              |
| 18105           | Nqo2           | 19            | 101             | 69               | 153            | 16             | 99               | 59                | 178             |
| 18106           | Cd244          | 8             | 5               | 31               | 44             | 10             | 18               | 33                | 217             |
| 18107           | Nmt1           | 145           | 790             | 1643             | 6012           | 154            | 846              | 1703              | 5836            |
| 18108           | Nmt2           | 78            | 60              | 21               | 112            | 63             | 46               | 24                | 56              |
| 18111           | Nnat           | 13            | 7               | 25               | 63             | 14             | 5                | 27                | 98              |
| 18113           | Nnmt           | 8             | 5               | 27               | 36             | 9              | 3                | 28                | 42              |
| 18115           | Nnt            | 49            | 182             | 69               | 461            | 48             | 219              | 74                | 330             |
| 18119           | Nodal          | 8             | 30              | 39               | 220            | 9              | 28               | 38                | 32              |
| 18121           | Nog            | 10            | 21              | 25               | 57             | 11             | 16               | 28                | 79              |
| 18124           | Nr4a3          | 39            | 4               | 31               | 866            | 11             | 3                | 36                | 40              |

| NCBI<br>Gene ID | Gene<br>Symbol | Affy.<br>CD4+ | Agilent<br>CD4+ | Illumina<br>CD4+ | Nimbl.<br>CD4+ | Affy.<br>CD19+ | Agilent<br>CD19+ | Illumina<br>CD19+ | Nimbl.<br>CD19+ |
|-----------------|----------------|---------------|-----------------|------------------|----------------|----------------|------------------|-------------------|-----------------|
| 18125           | Nos1           | 8             | 3               | 23               | 53             | 8              | 4                | 21                | 53              |
| 18126           | Nos2           | 9             | 3               | 28               | 30             | 8              | 12               | 30                | 33              |
| 18127           | Nos3           | 11            | 8               | 32               | 59             | 9              | 6                | 31                | 80              |
| 18128           | Notch1         | 261           | 234             | 979              | 1308           | 55             | 45               | 182               | 235             |
| 18129           | Notch2         | 116           | 315             | 28               | 64             | 577            | 1284             | 26                | 108             |
| 18130           | Ints6          | 142           | 284             | 44               | 3093           | 147            | 213              | 41                | 3014            |
| 18131           | Notch3         | 24            | 11              | 37               | 42             | 22             | 7                | 41                | 36              |
| 18132           | Notch4         | 16            | 4               | 42               | 161            | 15             | 7                | 41                | 150             |
| 18133           | Nov            | 7             | 2               | 22               | 31             | 7              | 3                | 25                | 25              |
| 18139           | Zfml           | 137           | 914             | 1058             | 8588           | 143            | 849              | 1104              | 6886            |
| 18140           | Uhrf1          | 11            | 90              | 166              | 255            | 25             | 352              | 609               | 673             |
| 18141           | Nup50          | 118           | 483             | 112              | 3861           | 99             | 227              | 84                | 2035            |
| 18142           | Npas1          | 12            | 4               | 24               | 59             | 14             | 5                | 23                | 52              |
| 18143           | Npas2          | 5             | 4               | 27               | 84             | 5              | 9                | 26                | 97              |
| 18145           | Npc1           | 109           | 92              | 1198             | 3532           | 79             | 53               | 926               | 2658            |
| 18146           | Npdc1          | 10            | 11              | 36               | 124            | 8              | 10               | 34                | 144             |
| 18148           | Npm1           | 1086          | 8351            | 19               | 32314          | 1009           | 6628             | 21                | 27830           |
| 18150           | Npm3           | 104           | 728             | 557              | 967            | 64             | 285              | 294               | 507             |
| 18155           | Pnoc           | 20            | 5               | 29               | 950            | 18             | 10               | 31                | 936             |
| 18158           | Nppb           | 10            | 28              | 22               | 23             | 9              | 29               | 22                | 22              |
| 18159           | Nppc           | 11            | 10              | 33               | 86             | 11             | 4                | 29                | 77              |
| 18160           | Npr1           | 8             | 2               | 34               | 60             | 8              | 3                | 32                | 60              |
| 18162           | Npr3           | 6             | 5               | 38               | 41             | 6              | 3                | 37                | 54              |
| 18164           | Nptx1          | 8             | 3               | 30               | 73             | 8              | 3                | 31                | 60              |
| 18166           | Npy1r          | 4             | 2               | 26               | 38             | 5              | 3                | 22                | 29              |
| 18167           | Npy2r          | 5             | 2               | 44               | 23             | 5              | 2                | 45                | 19              |
| 18168           | Npy5r          | 6             | 2               | 24               | 24             | 6              | 4                | 26                | 26              |
| 18169           | Npy6r          | 4             | 2               | 29               | 22             | 4              | 3                | 24                | 18              |
| 18171           | Nr1i2          | 9             | 5               | 28               | 24             | 10             | 3                | 28                | 32              |
| 18173           | Slc11a1        | 13            | 2               | 361              | 45             | 11             | 3                | 323               | 34              |
| 18174           | Slc11a2        | 65            | 205             | 154              | 3225           | 40             | 112              | 93                | 1908            |
| 18175           | Nrap           | 8             | 13              | 25               | 47             | 8              | 18               | 24                | 53              |
| 18176           | Nras           | 130           | 433             | 83               | 6072           | 101            | 322              | 63                | 4477            |
| 18181           | Nrf1           | 98            | 150             | 677              | 645            | 92             | 126              | 677               | 643             |
| 18183           | Nrg3           | 5             | 2               | 51               | 26             | 6              | 3                | 53                | 47              |
| 18185           | Nrl            | 6             | 8               | 35               | 21             | 7              | 6                | 31                | 24              |
| 18187           | Nrp2           | 7             | 20              | 29               | 39             | 10             | 35               | 29                | 118             |
| 18188           | Nrtn           | 19            | 24              | 26               | 105            | 19             | 19               | 28                | 109             |
| 18189           | Nrxn1          | 6             | 3               | 33               | 34             | 5              | 9                | 30                | 33              |
| 18191           | Nrxn3          | 7             | 5               | 71               | 100            | 6              | 4                | 64                | 163             |
| 18193           | Nsd1           | 337           | 97              | 100              | 764            | 333            | 83               | 99                | 1447            |
| 18194           | Nsdhl          | 44            | 52              | 706              | 969            | 43             | 36               | 507               | 616             |
| 18195           | Nsf            | 166           | 295             | 609              | 6633           | 229            | 247              | 815               | 6898            |
| 18196           | Nsg1           | 17            | 13              | 24               | 838            | 16             | 13               | 24                | 602             |
| 18197           | Nsg2           | 244           | 4509            | 1306             | 7436           | 11             | 135              | 30                | 58              |
| 18198           | Musk           | 6             | 4               | 24               | 26             | 6              | 4                | 23                | 24              |
| 18201           | Nsmaf          | 133           | 884             | 488              | 2342           | 235            | 1273             | 729               | 3339            |
| 18203           | Ntan1          | 69            | 84              | 643              | 1739           | 70             | 73               | 639               | 1548            |
| 18205           | Ntf3           | 8             | 2               | 29               | 18             | 8              | 3                | 23                | 22              |
| 18207           | Nthl1          | 13            | 37              | 61               | 227            | 12             | 45               | 62                | 292             |
| 18208           | Ntn1           | 12            | 2               | 36               | 49             | 11             | 4                | 31                | 63              |

| NCBI<br>Gene ID | Gene<br>Symbol | Affy.<br>CD4+ | Agilent<br>CD4+ | Illumina<br>CD4+ | Nimbl.<br>CD4+ | Affy.<br>CD19+ | Agilent<br>CD19+ | Illumina<br>CD19+ | Nimbl.<br>CD19+ |
|-----------------|----------------|---------------|-----------------|------------------|----------------|----------------|------------------|-------------------|-----------------|
| 18212           | Ntrk2          | 5             | 9               | 26               | 95             | 5              | 4                | 28                | 86              |
| 18213           | Ntrk3          | 9             | 46              | 61               | 1202           | 7              | 24               | 45                | 20              |
| 18214           | Ddr2           | 9             | 7               | 20               | 24             | 8              | 6                | 19                | 32              |
| 18216           | Ntsr1          | 6             | 32              | 59               | 65             | 6              | 23               | 60                | 71              |
| 18217           | Ntsr2          | 12            | 38              | 31               | 55             | 12             | 33               | 26                | 54              |
| 18218           | Dusp8          | 11            | 2               | 26               | 72             | 12             | 3                | 28                | 60              |
| 18220           | Nucb1          | 64            | 674             | 583              | 5954           | 63             | 764              | 565               | 6784            |
| 18221           | Nudc           | 79            | 3740            | 135              | 24370          | 76             | 4307             | 112               | 22497           |
| 18222           | Numb           | 94            | 121             | 935              | 186            | 48             | 44               | 471               | 111             |
| 18223           | Nimbl          | 14            | 14              | 35               | 65             | 15             | 14               | 34                | 66              |
| 18226           | Nup62          | 82            | 332             | 308              | 3521           | 102            | 402              | 383               | 3830            |
| 18227           | Nr4a2          | 23            | 34              | 46               | 438            | 21             | 8                | 39                | 165             |
| 18230           | Nxn            | 25            | 240             | 231              | 1009           | 27             | 243              | 174               | 748             |
| 18231           | Nxph1          | 5             | 3               | 33               | 42             | 6              | 3                | 29                | 37              |
| 18232           | Nxph2          | 5             | 2               | 22               | 34             | 5              | 3                | 19                | 33              |
| 18241           | Gpr143         | 6             | 11              | 25               | 24             | 5              | 12               | 21                | 23              |
| 18242           | Oat            | 57            | 467             | 23               | 9560           | 87             | 761              | 19                | 11977           |
| 18245           | Oaz1           | 644           | 9219            | 2631             | 15170          | 554            | 9565             | 2280              | 14035           |
| 18247           | Oaz2           | 40            | 182             | 111              | 579            | 38             | 203              | 97                | 508             |
| 18249           | Obp1a          | 4             | 2               | 16               | 15             | 5              | 5                | 21                | 15              |
| 18256           | Oc90           | 7             | 53              | 46               | 25             | 7              | 46               | 44                | 47              |
| 18260           | Ocln           | 5             | 3               | 25               | 38             | 5              | 3                | 27                | 31              |
| 18263           | Odc1           | 68            | 1028            | 20               | 748            | 140            | 2006             | 26                | 973             |
| 18285           | Odf1           | 5             | 4               | 20               | 21             | 5              | 4                | 22                | 21              |
| 18286           | Odf2           | 80            | 332             | 75               | 3675           | 88             | 335              | 70                | 3552            |
| 18293           | Ogdh           | 251           | 168             | 581              | 4512           | 242            | 141              | 441               | 2969            |
| 18294           | Ogg1           | 33            | 94              | 31               | 72             | 32             | 108              | 29                | 84              |
| 18295           | Ogn            | 4             | 2               | 38               | 23             | 4              | 3                | 36                | 33              |
| 18300           | Oit1           | 6             | 2               | 27               | 80             | 7              | 3                | 28                | 102             |
| 18301           | Fxyd5          | 1043          | 8868            | 3350             | 12621          | 130            | 909              | 383               | 1833            |
| 18302           | Oit3           | 10            | 4               | 29               | 22             | 12             | 8                | 28                | 24              |
| 18310           | Olf13          | 6             | 7               | 31               | 15             | 6              | 4                | 31                | 18              |
| 18312           | Olf15          | 4             | 32              | 23               | 76             | 4              | 37               | 24                | 80              |
| 18313           | Olf16          | 6             | 2               | 22               | 23             | 7              | 3                | 22                | 20              |
| 18314           | Olf17          | 5             | 19              | 22               | 21             | 5              | 19               | 22                | 17              |
| 18315           | Olf18          | 4             | 2               | 30               | 17             | 4              | 3                | 26                | 17              |
| 18316           | Olf19          | 4             | 8               | 22               | 22             | 5              | 12               | 25                | 17              |
| 18317           | Olf2           | 4             | 7               | 31               | 42             | 4              | 4                | 34                | 35              |
| 18321           | Olf23          | 4             | 4               | 20               | 39             | 4              | 3                | 21                | 21              |
| 18322           | Olf24          | 7             | 54              | 24               | 22             | 6              | 42               | 24                | 33              |
| 18323           | Olf25          | 4             | 22              | 24               | 27             | 4              | 16               | 23                | 78              |
| 18324           | Olf26          | 5             | 18              | 34               | 39             | 5              | 18               | 32                | 27              |
| 18329           | Olf30          | 6             | 23              | 23               | 39             | 6              | 31               | 24                | 49              |
| 18330           | Olf31          | 8             | 2               | 28               | 57             | 9              | 3                | 32                | 62              |
| 18331           | Olf32          | 4             | 40              | 18               | 23             | 5              | 36               | 16                | 25              |
| 18332           | Olf33          | 6             | 21              | 19               | 24             | 6              | 21               | 21                | 23              |
| 18341           | Olf42          | 5             | 13              | 27               | 25             | 5              | 8                | 33                | 34              |
| 18343           | Olf44          | 5             | 3               | 28               | 25             | 5              | 3                | 22                | 21              |
| 18344           | Olf45          | 6             | 10              | 30               | 16             | 7              | 18               | 31                | 15              |
| 18345           | Olf46          | 6             | 9               | 39               | 32             | 6              | 7                | 40                | 38              |
| 18346           | Olf47          | 4             | 13              | 26               | 27             | 4              | 15               | 24                | 21              |

| NCBI Gene ID | Gene Symbol | Affy. CD4+ | Agilent CD4+ | Illumina CD4+ | Nimbl. CD4+ | Affy. CD19+ | Agilent CD19+ | Illumina CD19+ | Nimbl. CD19+ |
|--------------|-------------|------------|--------------|---------------|-------------|-------------|---------------|----------------|--------------|
| 18347        | Olfr48      | 9          | 3            | 35            | 27          | 10          | 13            | 37             | 29           |
| 18348        | Olfr49      | 6          | 2            | 27            | 20          | 6           | 3             | 25             | 24           |
| 18349        | Olfr5       | 7          | 34           | 30            | 19          | 9           | 37            | 26             | 20           |
| 18350        | Olfr50      | 5          | 4            | 26            | 18          | 4           | 7             | 22             | 22           |
| 18351        | Olfr51      | 5          | 8            | 33            | 20          | 5           | 7             | 31             | 24           |
| 18352        | Olfr52      | 6          | 14           | 21            | 20          | 6           | 17            | 24             | 21           |
| 18354        | Olfr54      | 6          | 6            | 35            | 18          | 7           | 4             | 33             | 19           |
| 18357        | Olfr57      | 4          | 9            | 22            | 14          | 4           | 8             | 22             | 19           |
| 18358        | Olfr58      | 4          | 3            | 19            | 20          | 4           | 4             | 17             | 22           |
| 18359        | Olfr59      | 10         | 84           | 18            | 34          | 10          | 71            | 24             | 35           |
| 18361        | Olfr60      | 4          | 66           | 19            | 23          | 4           | 68            | 22             | 38           |
| 18362        | Olfr61      | 7          | 8            | 33            | 13          | 8           | 5             | 32             | 14           |
| 18363        | Olfr62      | 5          | 35           | 23            | 20          | 5           | 38            | 24             | 16           |
| 18365        | Olfr65      | 4          | 19           | 33            | 21          | 5           | 21            | 31             | 28           |
| 18366        | Olfr64      | 4          | 14           | 17            | 16          | 4           | 13            | 17             | 16           |
| 18367        | Olfr66      | 4          | 14           | 19            | 17          | 4           | 15            | 14             | 19           |
| 18368        | Olfr67      | 4          | 15           | 20            | 16          | 4           | 17            | 21             | 15           |
| 18369        | Olfr68      | 4          | 9            | 32            | 16          | 5           | 13            | 30             | 17           |
| 18370        | Olfr69      | 4          | 3            | 22            | 21          | 4           | 3             | 22             | 20           |
| 18372        | Olfr8       | 6          | 20           | 30            | 15          | 6           | 20            | 29             | 14           |
| 18377        | Omg         | 5          | 27           | 30            | 96          | 6           | 23            | 34             | 85           |
| 18378        | Omp         | 11         | 18           | 43            | 60          | 12          | 14            | 37             | 68           |
| 18383        | Tnfrsf11b   | 8          | 19           | 20            | 22          | 8           | 16            | 22             | 23           |
| 18386        | Oprd1       | 16         | 4            | 29            | 33          | 18          | 4             | 28             | 41           |
| 18387        | Oprk1       | 5          | 2            | 29            | 27          | 5           | 3             | 28             | 32           |
| 18390        | Oprm1       | 9          | 21           | 46            | 66          | 8           | 22            | 47             | 79           |
| 18391        | Oprs1       | 59         | 60           | 227           | 308         | 51          | 44            | 160            | 197          |
| 18392        | Orc1l       | 6          | 7            | 33            | 69          | 6           | 12            | 36             | 108          |
| 18393        | Orc2l       | 77         | 237          | 51            | 5605        | 77          | 286           | 47             | 5288         |
| 18399        | Slc22a6     | 9          | 35           | 25            | 94          | 9           | 30            | 26             | 87           |
| 18400        | Slc22a18    | 21         | 45           | 26            | 59          | 20          | 43            | 26             | 52           |
| 18405        | Orm1        | 13         | 2            | 34            | 21          | 9           | 3             | 30             | 31           |
| 18406        | Orm2        | 28         | 11           | 27            | 91          | 20          | 5             | 19             | 60           |
| 18407        | Orm3        | 11         | 7            | 40            | 33          | 7           | 3             | 36             | 33           |
| 18408        | Slc25a15    | 20         | 2            | 98            | 1496        | 21          | 3             | 97             | 1815         |
| 18412        | Sqstm1      | 267        | 4159         | 712           | 4541        | 270         | 4508          | 586            | 3358         |
| 18413        | Osm         | 19         | 79           | 186           | 2830        | 13          | 42            | 78             | 1142         |
| 18414        | Osmr        | 5          | 4            | 29            | 28          | 5           | 6             | 26             | 27           |
| 18416        | Otc         | 4          | 2            | 29            | 18          | 4           | 4             | 25             | 17           |
| 18417        | Cldn11      | 9          | 13           | 20            | 20          | 8           | 9             | 25             | 21           |
| 18420        | Otp         | 46         | 2            | 28            | 73          | 41          | 3             | 31             | 113          |
| 18422        | Ott         | 5          | 2            | 18            | 30          | 4           | 3             | 19             | 48           |
| 18423        | Otx1        | 7          | 4            | 23            | 29          | 6           | 3             | 21             | 27           |
| 18424        | Otx2        | 6          | 2            | 33            | 53          | 5           | 4             | 34             | 47           |
| 18426        | Ovol1       | 7          | 4            | 43            | 106         | 8           | 3             | 38             | 132          |
| 18429        | Oxt         | 31         | 37           | 33            | 147         | 34          | 30            | 32             | 127          |
| 18430        | Oxtr        | 7          | 2            | 30            | 170         | 8           | 4             | 30             | 235          |
| 18431        | P           | 9          | 4            | 27            | 20          | 9           | 3             | 23             | 17           |
| 18432        | Mybbp1a     | 176        | 299          | 173           | 700         | 212         | 314           | 196            | 689          |
| 18436        | P2rx1       | 7          | 4            | 32            | 35          | 6           | 21            | 33             | 45           |
| 18438        | P2rx4       | 43         | 66           | 67            | 790         | 82          | 150           | 108            | 1405         |



| NCBI<br>Gene ID | Gene<br>Symbol | Affy.<br>CD4+ | Agilent<br>CD4+ | Illumina<br>CD4+ | Nimbl.<br>CD4+ | Affy.<br>CD19+ | Agilent<br>CD19+ | Illumina<br>CD19+ | Nimbl.<br>CD19+ |
|-----------------|----------------|---------------|-----------------|------------------|----------------|----------------|------------------|-------------------|-----------------|
| 18439           | P2rx7          | 29            | 480             | 64               | 490            | 15             | 41               | 42                | 49              |
| 18440           | P2rx1          | 8             | 4               | 51               | 92             | 9              | 3                | 53                | 76              |
| 18441           | P2ry1          | 9             | 7               | 30               | 21             | 8              | 3                | 24                | 19              |
| 18442           | P2ry2          | 7             | 3               | 32               | 54             | 7              | 7                | 35                | 48              |
| 18451           | P4ha1          | 99            | 211             | 351              | 2127           | 38             | 70               | 100               | 707             |
| 18452           | P4ha2          | 10            | 116             | 63               | 129            | 7              | 6                | 24                | 38              |
| 18453           | P4hb           | 188           | 1112            | 1674             | 6046           | 200            | 1018             | 1735              | 5220            |
| 18457           | Pldn           | 40            | 137             | 591              | 4041           | 46             | 135              | 644               | 5218            |
| 18458           | Pabpc1         | 2429          | 23572           | 3775             | 32283          | 2023           | 9243             | 2655              | 25813           |
| 18459           | Pabpc2         | 4             | 253             | 27               | 21             | 5              | 95               | 22                | 21              |
| 18472           | Pafah1b1       | 141           | 791             | 1048             | 6417           | 124            | 435              | 758               | 4928            |
| 18475           | Pafah1b2       | 120           | 81              | 26               | 4255           | 114            | 68               | 23                | 3312            |
| 18476           | Pafah1b3       | 28            | 136             | 107              | 280            | 102            | 1349             | 1032              | 1868            |
| 18478           | Pah            | 8             | 2               | 22               | 36             | 7              | 3                | 24                | 22              |
| 18479           | Pak1           | 7             | 37              | 37               | 62             | 5              | 19               | 20                | 34              |
| 18481           | Pak3           | 5             | 10              | 32               | 35             | 5              | 14               | 30                | 36              |
| 18483           | Palm           | 12            | 3               | 31               | 131            | 12             | 5                | 36                | 162             |
| 18484           | Pam            | 14            | 6               | 35               | 19             | 10             | 3                | 27                | 19              |
| 18488           | Cntn3          | 5             | 3               | 25               | 35             | 5              | 3                | 29                | 37              |
| 18489           | Pap            | 6             | 2               | 27               | 23             | 6              | 3                | 28                | 22              |
| 18491           | Pappa          | 6             | 6               | 32               | 23             | 6              | 4                | 37                | 28              |
| 18503           | Pax1           | 11            | 3               | 29               | 46             | 12             | 3                | 30                | 51              |
| 18504           | Pax2           | 13            | 18              | 37               | 27             | 13             | 17               | 28                | 30              |
| 18505           | Pax3           | 9             | 5               | 23               | 21             | 8              | 5                | 23                | 28              |
| 18506           | Pax4           | 9             | 3               | 24               | 38             | 9              | 8                | 22                | 41              |
| 18507           | Pax5           | 12            | 4               | 25               | 46             | 1227           | 522              | 38                | 358             |
| 18508           | Pax6           | 6             | 15              | 65               | 45             | 7              | 13               | 70                | 39              |
| 18509           | Pax7           | 15            | 27              | 21               | 21             | 14             | 35               | 22                | 20              |
| 18510           | Pax8           | 12            | 8               | 32               | 107            | 12             | 4                | 31                | 36              |
| 18511           | Pax9           | 8             | 8               | 25               | 73             | 7              | 4                | 27                | 54              |
| 18514           | Pbx1           | 8             | 3               | 22               | 41             | 9              | 8                | 26                | 36              |
| 18515           | Pbx2           | 125           | 843             | 370              | 5244           | 79             | 571              | 161               | 3020            |
| 18516           | Pbx3           | 11            | 13              | 37               | 89             | 15             | 33               | 43                | 190             |
| 18518           | Igbp1          | 188           | 204             | 801              | 558            | 198            | 220              | 823               | 529             |
| 18519           | Pcaf           | 90            | 231             | 52               | 1782           | 40             | 80               | 31                | 752             |
| 18521           | Pcbp2          | 1336          | 4201            | 5833             | 7390           | 1152           | 3344             | 4415              | 5635            |
| 18526           | Pcdh10         | 5             | 3               | 28               | 42             | 5              | 3                | 30                | 40              |
| 18530           | Pcdh8          | 7             | 2               | 27               | 100            | 7              | 3                | 26                | 129             |
| 18534           | Pck1           | 8             | 9               | 23               | 65             | 8              | 11               | 24                | 76              |
| 18536           | Pcm1           | 128           | 133             | 63               | 593            | 141            | 69               | 69                | 432             |
| 18537           | Pcmt1          | 131           | 329             | 414              | 2930           | 154            | 357              | 675               | 3146            |
| 18538           | Pcna           | 429           | 2303            | 207              | 3868           | 394            | 2327             | 181               | 3220            |
| 18542           | Pcolce         | 19            | 98              | 36               | 54             | 17             | 97               | 35                | 42              |
| 18545           | Pcp2           | 24            | 267             | 417              | 144            | 22             | 447              | 601               | 161             |
| 18546           | Pcp4           | 19            | 9               | 26               | 69             | 46             | 179              | 23                | 753             |
| 18548           | Pcsk1          | 7             | 14              | 24               | 51             | 5              | 3                | 24                | 17              |
| 18549           | Pcsk2          | 7             | 152             | 36               | 211            | 7              | 118              | 36                | 175             |
| 18550           | Furin          | 56            | 444             | 32               | 121            | 49             | 308              | 34                | 117             |
| 18551           | Pcsk4          | 19            | 29              | 95               | 102            | 17             | 17               | 49                | 85              |
| 18554           | Pcsk7          | 60            | 508             | 510              | 667            | 54             | 570              | 439               | 400             |
| 18555           | Pctk1          | 95            | 461             | 113              | 779            | 93             | 464              | 100               | 582             |

| NCBI<br>Gene ID | Gene<br>Symbol | Affy.<br>CD4+ | Agilent<br>CD4+ | Illumina<br>CD4+ | Nimbl.<br>CD4+ | Affy.<br>CD19+ | Agilent<br>CD19+ | Illumina<br>CD19+ | Nimbl.<br>CD19+ |
|-----------------|----------------|---------------|-----------------|------------------|----------------|----------------|------------------|-------------------|-----------------|
| 18557           | Pctk3          | 10            | 5               | 38               | 20             | 9              | 8                | 36                | 23              |
| 18559           | Pctp           | 16            | 2               | 25               | 32             | 23             | 3                | 30                | 32              |
| 18563           | Pcx            | 13            | 329             | 29               | 65             | 11             | 304              | 27                | 87              |
| 18566           | Pdcd1          | 22            | 104             | 43               | 127            | 11             | 7                | 28                | 22              |
| 18567           | Pdcd2          | 72            | 1277            | 1446             | 1709           | 69             | 1021             | 1262              | 1415            |
| 18569           | Pdcd4          | 716           | 344             | 3915             | 40528          | 432            | 196              | 2551              | 33967           |
| 18570           | Pdcd6          | 65            | 2043            | 21               | 9757           | 54             | 1914             | 20                | 6919            |
| 18571           | Pdcd6ip        | 336           | 148             | 435              | 668            | 229            | 79               | 346               | 271             |
| 18572           | Pdcd11         | 86            | 107             | 164              | 1780           | 104            | 102              | 188               | 1548            |
| 18573           | Pde1a          | 5             | 9               | 31               | 27             | 5              | 13               | 32                | 49              |
| 18574           | Pde1b          | 124           | 474             | 502              | 127            | 115            | 416              | 438               | 82              |
| 18575           | Pde1c          | 9             | 7               | 31               | 40             | 9              | 7                | 25                | 114             |
| 18576           | Pde3b          | 267           | 95              | 140              | 372            | 78             | 45               | 56                | 123             |
| 18577           | Pde4a          | 12            | 14              | 285              | 26             | 17             | 445              | 218               | 30              |
| 18578           | Pde4b          | 45            | 1666            | 2072             | 22667          | 54             | 2738             | 2000              | 17238           |
| 18582           | Pde6d          | 89            | 138             | 278              | 1078           | 100            | 184              | 291               | 1296            |
| 18583           | Pde7a          | 127           | 188             | 60               | 538            | 324            | 468              | 137               | 1231            |
| 18584           | Pde8a          | 22            | 34              | 188              | 141            | 23             | 48               | 197               | 123             |
| 18585           | Pde9a          | 7             | 8               | 23               | 140            | 6              | 6                | 22                | 131             |
| 18587           | Pde6b          | 7             | 14              | 34               | 355            | 7              | 11               | 37                | 79              |
| 18588           | Pde6g          | 11            | 65              | 35               | 136            | 11             | 96               | 29                | 210             |
| 18590           | Pdgfa          | 20            | 21              | 27               | 23             | 20             | 16               | 25                | 60              |
| 18591           | Pdgfb          | 14            | 8               | 28               | 45             | 12             | 8                | 24                | 45              |
| 18595           | Pdgfra         | 8             | 6               | 44               | 40             | 9              | 8                | 39                | 44              |
| 18596           | Pdgfrb         | 6             | 2               | 34               | 66             | 6              | 3                | 34                | 107             |
| 18597           | Pdha1          | 277           | 787             | 1011             | 5432           | 169            | 338              | 604               | 3046            |
| 18598           | Pdha2          | 4             | 2               | 16               | 37             | 4              | 3                | 19                | 40              |
| 18599           | Padi1          | 9             | 93              | 89               | 92             | 10             | 80               | 44                | 47              |
| 18600           | Padi2          | 46            | 312             | 805              | 726            | 18             | 41               | 127               | 76              |
| 18601           | Padi3          | 18            | 96              | 35               | 81             | 16             | 16               | 27                | 49              |
| 18602           | Padi4          | 6             | 36              | 34               | 30             | 6              | 22               | 32                | 27              |
| 18604           | Pdk2           | 25            | 39              | 35               | 77             | 21             | 33               | 38                | 80              |
| 18605           | Enpp1          | 28            | 185             | 81               | 385            | 76             | 378              | 147               | 796             |
| 18606           | Enpp2          | 5             | 11              | 27               | 20             | 6              | 9                | 23                | 21              |
| 18607           | Pdpk1          | 182           | 494             | 625              | 17962          | 140            | 356              | 431               | 13333           |
| 18610           | Pdyn           | 8             | 41              | 54               | 34             | 8              | 43               | 50                | 23              |
| 18612           | Etv4           | 10            | 16              | 26               | 33             | 11             | 14               | 30                | 45              |
| 18613           | Pecam1         | 242           | 173             | 1752             | 2561           | 312            | 163              | 2624              | 2843            |
| 18616           | Peg3           | 5             | 9               | 25               | 56             | 5              | 15               | 26                | 37              |
| 18618           | Pemt           | 14            | 28              | 39               | 181            | 15             | 15               | 29                | 202             |
| 18619           | Penk1          | 10            | 74              | 36               | 640            | 7              | 21               | 36                | 35              |
| 18626           | Per1           | 90            | 215             | 77               | 854            | 119            | 290              | 79                | 1071            |
| 18627           | Per2           | 19            | 45              | 131              | 85             | 25             | 50               | 190               | 84              |
| 18628           | Per3           | 14            | 8               | 50               | 31             | 17             | 12               | 89                | 32              |
| 18630           | Pet2           | 5             | 2               | 27               | 23             | 4              | 4                | 31                | 25              |
| 18631           | Pex11a         | 8             | 53              | 33               | 102            | 6              | 36               | 24                | 40              |
| 18632           | Pex11b         | 35            | 463             | 496              | 361            | 32             | 593              | 456               | 299             |
| 18633           | Pex16          | 61            | 241             | 57               | 1789           | 65             | 299              | 46                | 1565            |
| 18634           | Pex7           | 34            | 170             | 51               | 733            | 48             | 272              | 77                | 1018            |
| 18637           | Pfdn2          | 150           | 491             | 433              | 16330          | 127            | 486              | 399               | 16100           |
| 18639           | Pfkfb1         | 10            | 58              | 37               | 26             | 11             | 70               | 33                | 27              |

| NCBI<br>Gene ID | Gene<br>Symbol | Affy.<br>CD4+ | Agilent<br>CD4+ | Illumina<br>CD4+ | Nimbl.<br>CD4+ | Affy.<br>CD19+ | Agilent<br>CD19+ | Illumina<br>CD19+ | Nimbl.<br>CD19+ |
|-----------------|----------------|---------------|-----------------|------------------|----------------|----------------|------------------|-------------------|-----------------|
| 18640           | Pfkfb2         | 47            | 33              | 135              | 203            | 46             | 52               | 169               | 106             |
| 18641           | Pfkl           | 70            | 293             | 520              | 764            | 68             | 322              | 533               | 641             |
| 18642           | Pfkm           | 40            | 258             | 340              | 1170           | 17             | 41               | 69                | 295             |
| 18643           | Pfn1           | 1093          | 3364            | 3708             | 10227          | 947            | 2678             | 2369              | 6084            |
| 18645           | Pfn2           | 7             | 24              | 86               | 353            | 8              | 22               | 73                | 288             |
| 18646           | Prf1           | 54            | 121             | 51               | 593            | 20             | 15               | 25                | 117             |
| 18647           | Pftk1          | 8             | 19              | 36               | 24             | 8              | 19               | 36                | 164             |
| 18648           | Pgam1          | 69            | 1418            | 39               | 1994           | 79             | 1472             | 43                | 2290            |
| 18654           | Pgf            | 7             | 28              | 27               | 66             | 9              | 21               | 29                | 78              |
| 18655           | Pgk1           | 280           | 2364            | 1293             | 10018          | 248            | 1580             | 939               | 6316            |
| 18663           | Pgk2           | 5             | 3               | 26               | 124            | 5              | 3                | 21                | 128             |
| 18667           | Pgr            | 5             | 2               | 28               | 19             | 6              | 3                | 25                | 25              |
| 18669           | Abcb1b         | 16            | 87              | 21               | 266            | 9              | 45               | 21                | 101             |
| 18670           | Abcb4          | 6             | 95              | 47               | 36             | 8              | 168              | 113               | 75              |
| 18671           | Abcb1a         | 13            | 4               | 20               | 570            | 10             | 3                | 22                | 430             |
| 18673           | Phb            | 172           | 2595            | 22               | 9843           | 102            | 1457             | 28                | 5296            |
| 18674           | Slc25a3        | 309           | 1375            | 2502             | 3962           | 323            | 1225             | 2372              | 3230            |
| 18675           | Phex           | 6             | 5               | 23               | 21             | 7              | 3                | 19                | 22              |
| 18676           | Phf2           | 124           | 158             | 358              | 5667           | 93             | 107              | 236               | 5062            |
| 18679           | Phka1          | 7             | 5               | 22               | 16             | 49             | 9                | 70                | 156             |
| 18682           | Phkg1          | 6             | 2               | 25               | 34             | 6              | 3                | 28                | 29              |
| 18685           | Phtf1          | 60            | 418             | 122              | 2755           | 40             | 290              | 90                | 1766            |
| 18686           | Phxr1          | 49            | 2               | 22               | 519            | 55             | 3                | 17                | 821             |
| 18700           | Piga           | 33            | 247             | 266              | 2248           | 22             | 125              | 155               | 1505            |
| 18701           | Pigf           | 56            | 172             | 518              | 860            | 74             | 188              | 709               | 1147            |
| 18703           | Pigr           | 8             | 3               | 78               | 22             | 10             | 9                | 153               | 105             |
| 18704           | Pik3c2a        | 96            | 51              | 29               | 71             | 94             | 26               | 26                | 57              |
| 18705           | Pik3c2g        | 5             | 21              | 30               | 26             | 4              | 20               | 27                | 16              |
| 18706           | Pik3ca         | 232           | 399             | 33               | 355            | 295            | 346              | 27                | 283             |
| 18707           | Pik3cd         | 487           | 2795            | 105              | 2024           | 279            | 1108             | 56                | 908             |
| 18708           | Pik3r1         | 235           | 636             | 1054             | 1836           | 168            | 364              | 674               | 834             |
| 18709           | Pik3r2         | 36            | 304             | 44               | 89             | 48             | 436              | 40                | 71              |
| 18710           | Pik3r3         | 11            | 44              | 37               | 35             | 8              | 32               | 34                | 33              |
| 18711           | Pip5k3         | 79            | 156             | 28               | 1819           | 167            | 362              | 43                | 2546            |
| 18712           | Pim1           | 276           | 405             | 97               | 211            | 166            | 218              | 71                | 105             |
| 18715           | Pim2           | 102           | 221             | 203              | 148            | 85             | 179              | 134               | 87              |
| 18716           | Pip            | 5             | 3               | 34               | 69             | 5              | 6                | 32                | 94              |
| 18717           | Pip5k1c        | 135           | 266             | 503              | 179            | 135            | 318              | 407               | 203             |
| 18718           | Pip5k2a        | 428           | 379             | 2818             | 7671           | 295            | 213              | 1832              | 4642            |
| 18719           | Pip5k1b        | 15            | 390             | 986              | 2794           | 31             | 277              | 639               | 1441            |
| 18720           | Pip5k1a        | 134           | 27              | 40               | 105            | 95             | 100              | 87                | 338             |
| 18724           | Pira3          | 13            | 19              | 27               | 11             | 160            | 705              | 369               | 615             |
| 18725           | Pira6          | 6             | 4               | 23               | 40             | 96             | 6                | 103               | 377             |
| 18739           | Pitpnm1        | 170           | 5807            | 2390             | 133            | 106            | 3761             | 1412              | 73              |
| 18740           | Pitx1          | 11            | 6               | 25               | 89             | 11             | 5                | 30                | 88              |
| 18741           | Pitx2          | 7             | 2               | 26               | 104            | 7              | 4                | 27                | 120             |
| 18742           | Pitx3          | 21            | 35              | 25               | 159            | 23             | 48               | 26                | 216             |
| 18744           | Pja1           | 131           | 1105            | 1505             | 1573           | 66             | 598              | 755               | 769             |
| 18746           | Pkm2           | 323           | 1580            | 2467             | 1267           | 203            | 885              | 1194              | 605             |
| 18747           | Prkaca         | 55            | 500             | 218              | 118            | 48             | 601              | 196               | 111             |
| 18749           | Prkacb         | 392           | 195             | 4262             | 9071           | 243            | 55               | 2549              | 4399            |

| NCBI<br>Gene ID | Gene<br>Symbol | Affy.<br>CD4+ | Agilent<br>CD4+ | Illumina<br>CD4+ | Nimbl.<br>CD4+ | Affy.<br>CD19+ | Agilent<br>CD19+ | Illumina<br>CD19+ | Nimbl.<br>CD19+ |
|-----------------|----------------|---------------|-----------------|------------------|----------------|----------------|------------------|-------------------|-----------------|
| 18750           | Prkca          | 110           | 26              | 47               | 618            | 42             | 8                | 35                | 197             |
| 18753           | Prkcd          | 105           | 364             | 491              | 1332           | 457            | 1473             | 1849              | 5081            |
| 18754           | Prkce          | 70            | 139             | 25               | 55             | 255            | 521              | 27                | 50              |
| 18755           | Prkch          | 549           | 503             | 300              | 9942           | 6              | 17               | 20                | 88              |
| 18759           | Prkci          | 62            | 70              | 23               | 217            | 76             | 86               | 22                | 302             |
| 18760           | Prkcm          | 5             | 2               | 29               | 17             | 5              | 3                | 30                | 18              |
| 18761           | Prkcq          | 887           | 3076            | 1125             | 17614          | 7              | 62               | 23                | 72              |
| 18762           | Prkcz          | 31            | 400             | 129              | 198            | 34             | 160              | 56                | 81              |
| 18763           | Pkd1           | 130           | 650             | 120              | 68             | 99             | 494              | 80                | 123             |
| 18764           | Pkd2           | 6             | 7               | 23               | 24             | 5              | 4                | 21                | 26              |
| 18766           | Pkdrej         | 8             | 7               | 23               | 22             | 7              | 4                | 20                | 20              |
| 18767           | Pkia           | 5             | 2               | 32               | 17             | 4              | 10               | 31                | 22              |
| 18768           | Pkib           | 10            | 3               | 29               | 64             | 27             | 169              | 513               | 558             |
| 18769           | Pkig           | 10            | 39              | 64               | 92             | 120            | 9193             | 4947              | 3911            |
| 18770           | Pklr           | 8             | 21              | 26               | 136            | 8              | 17               | 27                | 90              |
| 18771           | Pknox1         | 101           | 608             | 433              | 4155           | 60             | 329              | 224               | 2096            |
| 18772           | Pkp1           | 15            | 6               | 23               | 50             | 12             | 3                | 26                | 50              |
| 18777           | Lypla1         | 141           | 172             | 75               | 597            | 126            | 136              | 63                | 464             |
| 18778           | Pla2g1b        | 9             | 10              | 30               | 32             | 7              | 8                | 29                | 35              |
| 18780           | Pla2g2a        | 7             | 3               | 22               | 41             | 8              | 5                | 25                | 61              |
| 18781           | Pla2g2c        | 11            | 3               | 30               | 33             | 11             | 3                | 29                | 38              |
| 18782           | Pla2g2d        | 9             | 5               | 27               | 67             | 8              | 799              | 29                | 70              |
| 18783           | Pla2g4a        | 6             | 4               | 15               | 51             | 7              | 5                | 18                | 45              |
| 18784           | Pla2g5         | 7             | 4               | 31               | 35             | 7              | 5                | 30                | 35              |
| 18786           | Plaa           | 125           | 98              | 763              | 2429           | 129            | 102              | 701               | 1577            |
| 18787           | Serpine1       | 10            | 3               | 32               | 68             | 9              | 4                | 31                | 94              |
| 18788           | Serpinb2       | 5             | 3               | 25               | 14             | 5              | 7                | 25                | 18              |
| 18789           | Papola         | 467           | 531             | 290              | 18859          | 432            | 708              | 212               | 14063           |
| 18791           | Plat           | 7             | 71              | 30               | 70             | 6              | 46               | 28                | 20              |
| 18792           | Plau           | 5             | 3               | 36               | 40             | 5              | 5                | 39                | 37              |
| 18793           | Plaur          | 16            | 70              | 46               | 139            | 134            | 1086             | 345               | 234             |
| 18795           | Plcb1          | 7             | 15              | 25               | 33             | 6              | 12               | 28                | 90              |
| 18796           | Plcb2          | 200           | 470             | 32               | 340            | 140            | 366              | 30                | 459             |
| 18797           | Plcb3          | 24            | 18              | 57               | 108            | 36             | 39               | 66                | 171             |
| 18798           | Plcb4          | 9             | 3               | 24               | 39             | 7              | 3                | 27                | 22              |
| 18799           | Plcd1          | 11            | 55              | 17               | 32             | 11             | 33               | 25                | 27              |
| 18802           | Plcd4          | 6             | 6               | 36               | 58             | 6              | 8                | 34                | 51              |
| 18803           | Plcg1          | 420           | 1791            | 25               | 868            | 57             | 234              | 27                | 135             |
| 18805           | Pld1           | 6             | 4               | 24               | 18             | 6              | 10               | 20                | 18              |
| 18806           | Pld2           | 7             | 9               | 26               | 92             | 7              | 9                | 21                | 106             |
| 18807           | Pld3           | 85            | 1148            | 372              | 5615           | 65             | 589              | 214               | 3678            |
| 18810           | Plec1          | 188           | 964             | 2702             | 2713           | 84             | 473              | 1212              | 1534            |
| 18813           | Pa2g4          | 137           | 324             | 858              | 2970           | 160            | 277              | 1098              | 3012            |
| 18815           | Plg            | 5             | 3               | 42               | 86             | 5              | 4                | 46                | 101             |
| 18816           | Serpinf2       | 20            | 20              | 35               | 35             | 18             | 31               | 31                | 30              |
| 18817           | Plk1           | 15            | 101             | 97               | 411            | 16             | 75               | 86                | 415             |
| 18821           | Pln            | 6             | 2               | 27               | 27             | 5              | 3                | 32                | 31              |
| 18822           | Plod1          | 30            | 22              | 83               | 483            | 21             | 15               | 51                | 204             |
| 18824           | Plp2           | 113           | 165             | 375              | 3361           | 353            | 483              | 1131              | 6628            |
| 18826           | Lcp1           | 569           | 3431            | 404              | 14372          | 720            | 4104             | 509               | 14230           |
| 18828           | Plscr2         | 5             | 3               | 33               | 29             | 5              | 3                | 28                | 37              |

| NCBI<br>Gene ID | Gene<br>Symbol | Affy.<br>CD4+ | Agilent<br>CD4+ | Illumina<br>CD4+ | Nimbl.<br>CD4+ | Affy.<br>CD19+ | Agilent<br>CD19+ | Illumina<br>CD19+ | Nimbl.<br>CD19+ |
|-----------------|----------------|---------------|-----------------|------------------|----------------|----------------|------------------|-------------------|-----------------|
| 18829           | Ccl21c         | 10            | 2               | 26               | 107            | 12             | 3                | 26                | 89              |
| 18830           | Pltp           | 16            | 8               | 28               | 85             | 25             | 14               | 36                | 143             |
| 18843           | Plunc          | 6             | 2               | 24               | 18             | 5              | 2                | 20                | 18              |
| 18844           | Plxna1         | 25            | 194             | 28               | 27             | 19             | 206              | 24                | 27              |
| 18845           | Plxna2         | 8             | 6               | 36               | 28             | 9              | 4                | 39                | 37              |
| 18846           | Plxna3         | 17            | 13              | 22               | 38             | 20             | 26               | 30                | 26              |
| 18854           | Pml            | 126           | 441             | 789              | 936            | 467            | 1656             | 2776              | 4538            |
| 18858           | Pmp22          | 15            | 27              | 27               | 34             | 15             | 17               | 28                | 29              |
| 18861           | Pms2           | 65            | 205             | 198              | 252            | 62             | 173              | 176               | 202             |
| 18933           | Prrx1          | 6             | 22              | 27               | 20             | 5              | 22               | 32                | 23              |
| 18935           | Phox2b         | 10            | 3               | 28               | 24             | 8              | 3                | 24                | 24              |
| 18938           | Ppp1r14b       | 113           | 4329            | 1900             | 5427           | 108            | 4340             | 1767              | 4926            |
| 18946           | Pnliprp1       | 5             | 7               | 24               | 23             | 5              | 6                | 24                | 34              |
| 18947           | Pnliprp2       | 6             | 2               | 31               | 22             | 6              | 3                | 28                | 53              |
| 18948           | Pnmt           | 6             | 40              | 38               | 57             | 6              | 34               | 27                | 53              |
| 18949           | Pnn            | 285           | 1360            | 29               | 9520           | 265            | 1374             | 27                | 7871            |
| 18950           | Pnp            | 38            | 74              | 311              | 653            | 75             | 181              | 659               | 1318            |
| 18951           | 5-Sep          | 10            | 9               | 40               | 27             | 10             | 10               | 37                | 25              |
| 18952           | 4-Sep          | 10            | 31              | 34               | 137            | 9              | 21               | 28                | 78              |
| 18968           | Pola1          | 19            | 37              | 20               | 222            | 31             | 73               | 22                | 241             |
| 18969           | Pola2          | 64            | 49              | 219              | 1039           | 68             | 81               | 239               | 1154            |
| 18970           | Polb           | 70            | 229             | 337              | 3639           | 78             | 242              | 388               | 4904            |
| 18971           | Pold1          | 56            | 773             | 694              | 312            | 149            | 2845             | 2330              | 984             |
| 18972           | Pold2          | 50            | 124             | 590              | 992            | 44             | 106              | 464               | 707             |
| 18973           | Pole           | 11            | 57              | 49               | 100            | 19             | 167              | 91                | 214             |
| 18974           | Pole2          | 28            | 83              | 43               | 4410           | 19             | 29               | 37                | 2179            |
| 18975           | Polg           | 103           | 335             | 187              | 766            | 84             | 267              | 134               | 572             |
| 18976           | Pomc1          | 9             | 36              | 26               | 93             | 10             | 35               | 29                | 90              |
| 18979           | Pon1           | 5             | 2               | 28               | 18             | 6              | 3                | 24                | 18              |
| 18983           | Cnot7          | 143           | 32              | 589              | 3338           | 133            | 21               | 464               | 2510            |
| 18984           | Por            | 89            | 1186            | 147              | 1082           | 51             | 500              | 75                | 515             |
| 18985           | Pou2af1        | 34            | 619             | 122              | 533            | 679            | 29303            | 2931              | 5134            |
| 18986           | Pou2f1         | 100           | 566             | 264              | 1143           | 158            | 891              | 366               | 1275            |
| 18987           | Pou2f2         | 31            | 30              | 88               | 231            | 162            | 381              | 639               | 650             |
| 18988           | Pou2f3         | 8             | 11              | 22               | 31             | 9              | 12               | 23                | 51              |
| 18991           | Pou3f1         | 12            | 20              | 25               | 35             | 11             | 16               | 24                | 37              |
| 18992           | Pou3f2         | 9             | 3               | 31               | 65             | 11             | 3                | 30                | 54              |
| 18993           | Pou3f3         | 11            | 9               | 25               | 121            | 10             | 8                | 27                | 171             |
| 18994           | Pou3f4         | 6             | 7               | 47               | 43             | 6              | 4                | 45                | 48              |
| 18996           | Pou4f1         | 5             | 192             | 25               | 53             | 6              | 140              | 28                | 58              |
| 18997           | Pou4f2         | 14            | 7               | 36               | 27             | 12             | 5                | 36                | 46              |
| 18998           | Pou4f3         | 6             | 16              | 34               | 141            | 5              | 18               | 32                | 134             |
| 18999           | Pou5f1         | 5             | 6               | 34               | 39             | 6              | 8                | 36                | 31              |
| 19009           | Pou6f1         | 44            | 146             | 232              | 465            | 48             | 127              | 216               | 450             |
| 19011           | Pp11r          | 8             | 4               | 22               | 61             | 16             | 100              | 66                | 2670            |
| 19012           | Ppap2a         | 6             | 4               | 34               | 70             | 5              | 3                | 35                | 66              |
| 19013           | Ppara          | 5             | 5               | 26               | 47             | 6              | 9                | 24                | 72              |
| 19015           | Ppard          | 42            | 15              | 476              | 43             | 39             | 17               | 378               | 42              |
| 19016           | Pparg          | 6             | 32              | 26               | 49             | 5              | 33               | 26                | 69              |
| 19017           | Ppargc1a       | 6             | 32              | 34               | 61             | 10             | 38               | 42                | 156             |
| 19018           | Scand1         | 170           | 873             | 917              | 1940           | 190            | 1107             | 971               | 4192            |

| NCBI<br>Gene ID | Gene<br>Symbol | Affy.<br>CD4+ | Agilent<br>CD4+ | Illumina<br>CD4+ | Nimbl.<br>CD4+ | Affy.<br>CD19+ | Agilent<br>CD19+ | Illumina<br>CD19+ | Nimbl.<br>CD19+ |
|-----------------|----------------|---------------|-----------------|------------------|----------------|----------------|------------------|-------------------|-----------------|
| 19023           | Ppef2          | 8             | 6               | 24               | 25             | 8              | 10               | 27                | 33              |
| 19024           | Ppfibp2        | 11            | 16              | 31               | 24             | 41             | 470              | 57                | 1149            |
| 19027           | Sypl           | 44            | 127             | 378              | 6919           | 163            | 540              | 1696              | 18397           |
| 19035           | Ppib           | 228           | 4162            | 2016             | 13161          | 232            | 5267             | 1818              | 14213           |
| 19038           | Ppic           | 20            | 99              | 37               | 1377           | 14             | 8                | 24                | 36              |
| 19039           | Lgals3bp       | 155           | 1352            | 573              | 264            | 48             | 333              | 144               | 57              |
| 19041           | Ppl            | 11            | 17              | 22               | 31             | 13             | 41               | 58                | 63              |
| 19042           | Ppm1a          | 153           | 1156            | 752              | 6313           | 149            | 935              | 548               | 4868            |
| 19043           | Ppm1b          | 119           | 777             | 1379             | 4595           | 60             | 290              | 690               | 1755            |
| 19044           | Ppox           | 62            | 291             | 224              | 412            | 68             | 284              | 192               | 435             |
| 19045           | Ppp1ca         | 674           | 7541            | 2950             | 8686           | 653            | 6424             | 2631              | 7191            |
| 19046           | Ppp1cb         | 383           | 4450            | 129              | 10827          | 323            | 4223             | 103               | 7680            |
| 19047           | Ppp1cc         | 591           | 3131            | 217              | 15234          | 576            | 2625             | 215               | 14815           |
| 19049           | Ppp1r1b        | 15            | 37              | 50               | 31             | 13             | 28               | 44                | 49              |
| 19051           | Gsbs           | 4             | 6               | 42               | 20             | 4              | 6                | 37                | 20              |
| 19052           | Ppp2ca         | 574           | 935             | 4003             | 7777           | 550            | 733              | 3427              | 6131            |
| 19053           | Ppp2cb         | 242           | 308             | 1020             | 3486           | 249            | 261              | 924               | 2839            |
| 19055           | Ppp3ca         | 108           | 758             | 565              | 2060           | 369            | 2798             | 1411              | 3908            |
| 19056           | Ppp3cb         | 216           | 543             | 1686             | 3656           | 203            | 430              | 1774              | 3235            |
| 19057           | Ppp3cc         | 204           | 578             | 530              | 4394           | 317            | 1092             | 832               | 5239            |
| 19058           | Ppp3r1         | 65            | 76              | 395              | 3454           | 60             | 59               | 342               | 3709            |
| 19059           | Ppp3r2         | 4             | 34              | 25               | 59             | 5              | 30               | 27                | 110             |
| 19060           | Ppp5c          | 147           | 77              | 93               | 261            | 189            | 98               | 95                | 271             |
| 19063           | Ppt1           | 96            | 394             | 91               | 4277           | 141            | 549              | 110               | 5292            |
| 19064           | Ppy            | 19            | 3               | 26               | 30             | 18             | 3                | 25                | 44              |
| 19065           | Ppyr1          | 6             | 20              | 24               | 23             | 6              | 13               | 28                | 23              |
| 19069           | Nup88          | 82            | 1403            | 105              | 3523           | 97             | 1414             | 122               | 3168            |
| 19072           | Prep           | 101           | 190             | 138              | 1592           | 149            | 301              | 221               | 2367            |
| 19074           | Prg2           | 9             | 4               | 34               | 41             | 9              | 26               | 59                | 70              |
| 19075           | Prim1          | 24            | 406             | 92               | 419            | 35             | 504              | 90                | 559             |
| 19076           | Prim2          | 21            | 178             | 67               | 364            | 25             | 210              | 77                | 386             |
| 19079           | Prkab1         | 160           | 422             | 565              | 4923           | 154            | 277              | 431               | 3822            |
| 19082           | Prkag1         | 271           | 1334            | 855              | 2209           | 188            | 856              | 489               | 1310            |
| 19084           | Prkar1a        | 272           | 363             | 2149             | 7813           | 250            | 276              | 2109              | 6527            |
| 19085           | Prkar1b        | 9             | 19              | 25               | 50             | 9              | 17               | 29                | 38              |
| 19087           | Prkar2a        | 17            | 23              | 61               | 1218           | 10             | 16               | 37                | 580             |
| 19088           | Prkar2b        | 6             | 45              | 71               | 216            | 10             | 89               | 110               | 387             |
| 19089           | Prkcsh         | 103           | 1682            | 1751             | 2292           | 69             | 1120             | 1096              | 1789            |
| 19090           | Prkdc          | 84            | 215             | 484              | 518            | 89             | 196              | 484               | 407             |
| 19091           | Prkg1          | 4             | 8               | 25               | 31             | 4              | 10               | 27                | 30              |
| 19092           | Prkg2          | 6             | 3               | 42               | 64             | 6              | 4                | 41                | 47              |
| 19094           | Mapk11         | 53            | 541             | 576              | 748            | 102            | 1032             | 1017              | 1252            |
| 19108           | Prkx           | 137           | 656             | 720              | 1267           | 103            | 373              | 425               | 659             |
| 19109           | Prl            | 5             | 12              | 25               | 23             | 4              | 11               | 27                | 22              |
| 19116           | Prlr           | 5             | 71              | 36               | 64             | 5              | 63               | 38                | 63              |
| 19118           | Prm1           | 17            | 117             | 31               | 20             | 16             | 104              | 33                | 28              |
| 19119           | Prm2           | 17            | 32              | 86               | 29             | 18             | 34               | 78                | 36              |
| 19120           | Prm3           | 24            | 25              | 38               | 102            | 23             | 26               | 36                | 106             |
| 19122           | Prnp           | 9             | 40              | 145              | 125            | 7              | 25               | 87                | 80              |
| 19123           | Proc           | 6             | 28              | 23               | 61             | 7              | 26               | 26                | 77              |
| 19124           | Procr          | 6             | 2               | 20               | 30             | 7              | 3                | 29                | 28              |

| NCBI<br>Gene ID | Gene<br>Symbol | Affy.<br>CD4+ | Agilent<br>CD4+ | Illumina<br>CD4+ | Nimbl.<br>CD4+ | Affy.<br>CD19+ | Agilent<br>CD19+ | Illumina<br>CD19+ | Nimbl.<br>CD19+ |
|-----------------|----------------|---------------|-----------------|------------------|----------------|----------------|------------------|-------------------|-----------------|
| 19125           | Prodh          | 16            | 26              | 32               | 274            | 14             | 35               | 29                | 161             |
| 19126           | Prom1          | 5             | 3               | 39               | 64             | 6              | 8                | 35                | 70              |
| 19127           | Prop1          | 7             | 34              | 23               | 36             | 6              | 30               | 18                | 30              |
| 19128           | Pros1          | 6             | 10              | 33               | 228            | 5              | 16               | 23                | 38              |
| 19130           | Prox1          | 5             | 2               | 29               | 16             | 5              | 17               | 32                | 17              |
| 19131           | Prh1           | 36            | 270             | 22               | 42             | 35             | 215              | 29                | 35              |
| 19134           | Prpf4b         | 266           | 172             | 29               | 10563          | 284            | 152              | 25                | 11589           |
| 19139           | Prps1          | 186           | 750             | 780              | 5802           | 143            | 533              | 587               | 3737            |
| 19141           | Lgmn           | 85            | 250             | 153              | 446            | 428            | 1694             | 708               | 2405            |
| 19142           | Prss12         | 15            | 61              | 49               | 73             | 12             | 65               | 47                | 79              |
| 19143           | St14           | 14            | 19              | 26               | 55             | 43             | 233              | 73                | 115             |
| 19144           | Klk6           | 7             | 3               | 30               | 24             | 6              | 3                | 33                | 42              |
| 19146           | Prss7          | 5             | 12              | 24               | 27             | 5              | 13               | 24                | 41              |
| 19152           | Prtn3          | 5             | 21              | 22               | 53             | 6              | 22               | 19                | 51              |
| 19153           | Prx            | 9             | 26              | 26               | 56             | 8              | 25               | 26                | 48              |
| 19155           | Npepps         | 125           | 407             | 22               | 1192           | 100            | 241              | 22                | 934             |
| 19156           | Psap           | 904           | 699             | 2353             | 5962           | 1587           | 879              | 3719              | 8010            |
| 19157           | Pscd1          | 284           | 1949            | 647              | 3683           | 255            | 2325             | 556               | 3818            |
| 19158           | Pscd2          | 81            | 218             | 41               | 1617           | 68             | 175              | 36                | 1242            |
| 19159           | Pscd3          | 64            | 82              | 808              | 1850           | 21             | 22               | 156               | 250             |
| 19164           | Psen1          | 134           | 304             | 135              | 3143           | 125            | 277              | 120               | 2877            |
| 19165           | Psen2          | 113           | 1791            | 259              | 1845           | 110            | 1820             | 241               | 2090            |
| 19166           | Psma2          | 146           | 5946            | 4408             | 9097           | 136            | 4659             | 4233              | 8081            |
| 19167           | Psma3          | 175           | 556             | 3960             | 6575           | 149            | 520              | 3951              | 7175            |
| 19170           | Psemb1         | 135           | 1664            | 1559             | 11224          | 130            | 1881             | 1566              | 9423            |
| 19171           | Psemb10        | 153           | 5385            | 1865             | 2511           | 153            | 5799             | 1796              | 2722            |
| 19172           | Psemb4         | 197           | 3508            | 3600             | 6216           | 201            | 3398             | 2809              | 6001            |
| 19173           | Psemb5         | 141           | 1262            | 757              | 11294          | 143            | 1399             | 744               | 11260           |
| 19175           | Psemb6         | 178           | 3233            | 1842             | 6411           | 151            | 4054             | 1731              | 6904            |
| 19177           | Psemb7         | 164           | 414             | 1417             | 6796           | 157            | 482              | 1523              | 6476            |
| 19179           | Psmc1          | 147           | 976             | 351              | 11117          | 167            | 1111             | 349               | 11619           |
| 19181           | Psmc2          | 96            | 1495            | 122              | 6464           | 91             | 1576             | 120               | 5807            |
| 19182           | Psmc3          | 147           | 459             | 996              | 6295           | 137            | 459              | 892               | 5534            |
| 19183           | Psmc3ip        | 16            | 53              | 139              | 845            | 12             | 86               | 153               | 1198            |
| 19184           | Psmc5          | 130           | 721             | 1239             | 794            | 125            | 764              | 1196              | 745             |
| 19185           | Psmd4          | 120           | 1027            | 2000             | 2996           | 103            | 927              | 1675              | 2307            |
| 19186           | Psmc1          | 318           | 7434            | 4092             | 11928          | 264            | 7272             | 3478              | 9329            |
| 19192           | Psmc3          | 197           | 321             | 781              | 378            | 208            | 287              | 824               | 373             |
| 19193           | Pipox          | 10            | 6               | 25               | 22             | 10             | 12               | 27                | 26              |
| 19194           | Psp            | 5             | 41              | 21               | 20             | 6              | 24               | 24                | 21              |
| 19197           | Pspn           | 13            | 16              | 50               | 57             | 12             | 21               | 45                | 46              |
| 19200           | Pstpip1        | 200           | 1288            | 1445             | 4114           | 114            | 690              | 688               | 1798            |
| 19204           | Ptafr          | 9             | 24              | 28               | 23             | 10             | 21               | 31                | 29              |
| 19205           | Ptbp1          | 252           | 2082            | 1672             | 989            | 214            | 1625             | 1719              | 982             |
| 19206           | Ptch1          | 79            | 11              | 85               | 34             | 61             | 6                | 63                | 46              |
| 19207           | Ptch2          | 10            | 28              | 24               | 86             | 9              | 20               | 26                | 79              |
| 19208           | Ptcra          | 16            | 11              | 43               | 40             | 15             | 17               | 46                | 32              |
| 19210           | Ptdss1         | 111           | 210             | 39               | 2345           | 105            | 206              | 35                | 1671            |
| 19211           | Pten           | 382           | 696             | 325              | 3517           | 701            | 1492             | 667               | 4394            |
| 19212           | Pter           | 6             | 6               | 26               | 90             | 6              | 5                | 27                | 47              |
| 19213           | Ptf1a          | 9             | 5               | 29               | 94             | 8              | 5                | 30                | 87              |

| NCBI<br>Gene ID | Gene<br>Symbol | Affy.<br>CD4+ | Agilent<br>CD4+ | Illumina<br>CD4+ | Nimbl.<br>CD4+ | Affy.<br>CD19+ | Agilent<br>CD19+ | Illumina<br>CD19+ | Nimbl.<br>CD19+ |
|-----------------|----------------|---------------|-----------------|------------------|----------------|----------------|------------------|-------------------|-----------------|
| 19214           | Ptgdr          | 14            | 2               | 24               | 20             | 13             | 3                | 23                | 20              |
| 19215           | Ptgds          | 13            | 12              | 36               | 74             | 12             | 12               | 38                | 61              |
| 19216           | Ptger1         | 98            | 6               | 31               | 53             | 83             | 9                | 30                | 50              |
| 19217           | Ptger2         | 7             | 18              | 54               | 179            | 6              | 3                | 26                | 32              |
| 19218           | Ptger3         | 6             | 4               | 25               | 46             | 6              | 3                | 25                | 33              |
| 19219           | Ptger4         | 118           | 109             | 28               | 454            | 61             | 46               | 27                | 162             |
| 19220           | Ptgfr          | 5             | 2               | 24               | 18             | 5              | 3                | 22                | 25              |
| 19221           | Ptgfrn         | 12            | 69              | 34               | 83             | 7              | 58               | 16                | 40              |
| 19222           | Ptgir          | 17            | 61              | 96               | 174            | 13             | 64               | 19                | 88              |
| 19223           | Ptgis          | 13            | 2               | 21               | 45             | 10             | 3                | 23                | 69              |
| 19224           | Ptgs1          | 6             | 3               | 31               | 38             | 7              | 8                | 30                | 50              |
| 19225           | Ptgs2          | 7             | 4               | 27               | 25             | 7              | 3                | 26                | 32              |
| 19226           | Pth            | 4             | 2               | 23               | 22             | 4              | 3                | 22                | 21              |
| 19227           | Pthlh          | 9             | 12              | 30               | 86             | 10             | 14               | 33                | 137             |
| 19228           | Pthr1          | 9             | 5               | 27               | 51             | 9              | 5                | 26                | 44              |
| 19229           | Ptk2b          | 375           | 942             | 209              | 381            | 669            | 1495             | 332               | 657             |
| 19231           | Ptma           | 703           | 9785            | 3210             | 38477          | 832            | 13334            | 3596              | 41795           |
| 19240           | Tmsb10         | 2105          | 11508           | 55               | 754            | 1141           | 5052             | 38                | 477             |
| 19241           | Tmsb4x         | 1258          | 67440           | 23               | 23798          | 1127           | 50651            | 22                | 22819           |
| 19242           | Ptn            | 6             | 4               | 23               | 191            | 6              | 10               | 25                | 240             |
| 19243           | Ptp4a1         | 123           | 683             | 130              | 4520           | 113            | 571              | 138               | 3137            |
| 19244           | Ptp4a2         | 536           | 4749            | 8258             | 19418          | 611            | 5437             | 8555              | 16975           |
| 19245           | Ptp4a3         | 167           | 673             | 403              | 5816           | 528            | 3403             | 1284              | 12776           |
| 19246           | Ptpn1          | 200           | 4459            | 497              | 3696           | 212            | 5185             | 466               | 3016            |
| 19247           | Ptpn11         | 93            | 2091            | 134              | 1260           | 95             | 1813             | 117               | 1203            |
| 19248           | Ptpn12         | 70            | 77              | 113              | 988            | 43             | 34               | 63                | 541             |
| 19249           | Ptpn13         | 8             | 42              | 56               | 120            | 7              | 6                | 65                | 28              |
| 19250           | Ptpn14         | 18            | 28              | 27               | 43             | 50             | 55               | 54                | 352             |
| 19252           | Dusp1          | 425           | 736             | 2011             | 2244           | 278            | 379              | 1274              | 1496            |
| 19253           | Ptpn18         | 20            | 14574           | 4158             | 3647           | 21             | 10018            | 2532              | 3960            |
| 19255           | Ptpn2          | 87            | 1744            | 69               | 1295           | 67             | 1300             | 64                | 1217            |
| 19256           | Ptpn20         | 5             | 2               | 28               | 42             | 5              | 3                | 26                | 40              |
| 19258           | Ptpn4          | 51            | 18              | 19               | 420            | 80             | 15               | 23                | 463             |
| 19259           | Ptpn5          | 18            | 28              | 41               | 40             | 16             | 45               | 36                | 30              |
| 19262           | Ptpra          | 110           | 1872            | 165              | 1989           | 79             | 1064             | 103               | 1190            |
| 19263           | Ptprb          | 8             | 3               | 29               | 43             | 8              | 3                | 29                | 75              |
| 19264           | Ptprc          | 1828          | 12972           | 544              | 23151          | 1567           | 8911             | 416               | 17894           |
| 19265           | Ptprcap        | 502           | 8657            | 855              | 19879          | 737            | 15442            | 1012              | 28428           |
| 19266           | Ptprd          | 6             | 18              | 75               | 63             | 6              | 19               | 70                | 50              |
| 19267           | Ptpre          | 43            | 621             | 8582             | 731            | 33             | 447              | 5794              | 327             |
| 19268           | Ptprf          | 10            | 112             | 25               | 77             | 9              | 20               | 23                | 72              |
| 19270           | Ptprg          | 8             | 2               | 32               | 22             | 7              | 3                | 34                | 26              |
| 19271           | Ptprj          | 11            | 11              | 28               | 45             | 502            | 1375             | 38                | 1609            |
| 19272           | Ptprk          | 8             | 32              | 40               | 136            | 7              | 7                | 45                | 67              |
| 19273           | Ptpru          | 10            | 18              | 28               | 75             | 10             | 16               | 31                | 58              |
| 19274           | Ptprm          | 6             | 6               | 32               | 26             | 6              | 4                | 33                | 22              |
| 19275           | Ptprn          | 9             | 8               | 37               | 54             | 9              | 9                | 33                | 47              |
| 19276           | Ptprn2         | 10            | 3               | 24               | 43             | 10             | 3                | 28                | 63              |
| 19277           | Ptpro          | 7             | 6               | 34               | 23             | 7              | 4                | 30                | 20              |
| 19279           | Ptpr           | 5             | 7               | 35               | 24             | 5              | 9                | 35                | 29              |
| 19280           | Ptprs          | 21            | 481             | 84               | 225            | 28             | 728              | 111               | 245             |



| NCBI<br>Gene ID | Gene<br>Symbol | Affy.<br>CD4+ | Agilent<br>CD4+ | Illumina<br>CD4+ | Nimbl.<br>CD4+ | Affy.<br>CD19+ | Agilent<br>CD19+ | Illumina<br>CD19+ | Nimbl.<br>CD19+ |
|-----------------|----------------|---------------|-----------------|------------------|----------------|----------------|------------------|-------------------|-----------------|
| 19281           | Ptprt          | 9             | 6               | 25               | 44             | 9              | 6                | 22                | 71              |
| 19283           | Ptprz1         | 4             | 190302          | 26               | 19             | 4              | 205617           | 22                | 31              |
| 19285           | PtRF           | 11            | 82              | 26               | 36             | 10             | 66               | 23                | 37              |
| 19286           | Pts            | 63            | 459             | 80               | 5833           | 73             | 584              | 83                | 5604            |
| 19288           | Ptx3           | 5             | 3               | 29               | 37             | 5              | 3                | 29                | 33              |
| 19289           | Punc           | 15            | 141             | 32               | 42             | 14             | 158              | 24                | 58              |
| 19290           | Pura           | 206           | 1521            | 22               | 4759           | 211            | 1301             | 23                | 4308            |
| 19291           | Purb           | 84            | 4266            | 324              | 7234           | 93             | 1104             | 334               | 6150            |
| 19293           | Pvalb          | 7             | 2               | 24               | 52             | 7              | 3                | 27                | 65              |
| 19294           | Pvrl2          | 7             | 10              | 31               | 85             | 6              | 15               | 29                | 83              |
| 19298           | Pex19          | 56            | 141             | 494              | 307            | 58             | 174              | 567               | 225             |
| 19299           | Abcd3          | 36            | 294             | 130              | 2435           | 30             | 258              | 132               | 2017            |
| 19300           | Abcd4          | 38            | 340             | 218              | 801            | 40             | 250              | 201               | 479             |
| 19301           | Pxmp2          | 10            | 90              | 45               | 209            | 9              | 81               | 78                | 415             |
| 19302           | Pxmp3          | 18            | 35              | 422              | 984            | 20             | 49               | 473               | 932             |
| 19303           | Pxn            | 101           | 216             | 311              | 3175           | 97             | 199              | 259               | 3029            |
| 19305           | Pex5           | 35            | 192             | 126              | 234            | 28             | 166              | 86                | 191             |
| 19309           | Pygm           | 32            | 17              | 29               | 126            | 22             | 5                | 24                | 89              |
| 19317           | Qk             | 73            | 41              | 27               | 2131           | 124            | 300              | 26                | 2526            |
| 19324           | Rab1           | 318           | 657             | 185              | 4821           | 327            | 594              | 185               | 4146            |
| 19325           | Rab10          | 442           | 806             | 329              | 2586           | 396            | 477              | 259               | 1729            |
| 19326           | Rab11b         | 37            | 1397            | 4420             | 1068           | 40             | 1090             | 3767              | 861             |
| 19328           | Rab12          | 39            | 196             | 97               | 87             | 38             | 199              | 97                | 77              |
| 19329           | Rab17          | 11            | 12              | 77               | 53             | 10             | 19               | 36                | 59              |
| 19330           | Rab18          | 48            | 432             | 465              | 2857           | 38             | 354              | 376               | 2137            |
| 19331           | Rab19          | 29            | 561             | 63               | 1138           | 42             | 905              | 79                | 1492            |
| 19332           | Rab20          | 21            | 31              | 30               | 1327           | 16             | 10               | 27                | 343             |
| 19334           | Rab22a         | 93            | 234             | 356              | 399            | 73             | 164              | 279               | 357             |
| 19335           | Rab23          | 17            | 94              | 42               | 243            | 14             | 80               | 41                | 194             |
| 19336           | Rab24          | 108           | 998             | 451              | 10061          | 113            | 1032             | 432               | 9723            |
| 19337           | Rab33a         | 5             | 41              | 52               | 429            | 6              | 35               | 46                | 172             |
| 19338           | Rab33b         | 59            | 190             | 508              | 5023           | 49             | 125              | 460               | 4282            |
| 19339           | Rab3a          | 11            | 115             | 68               | 45             | 10             | 151              | 50                | 57              |
| 19340           | Rab3d          | 13            | 72              | 216              | 636            | 11             | 41               | 88                | 304             |
| 19341           | Rab4a          | 42            | 104             | 186              | 1371           | 20             | 4                | 27                | 63              |
| 19342           | Rab4b          | 105           | 308             | 270              | 2103           | 159            | 472              | 368               | 2632            |
| 19344           | Rab5b          | 109           | 15              | 157              | 1311           | 136            | 20               | 185               | 1221            |
| 19345           | Rab5c          | 176           | 396             | 1510             | 3272           | 181            | 531              | 1380              | 3440            |
| 19346           | Rab6           | 103           | 940             | 88               | 9285           | 95             | 681              | 87                | 8898            |
| 19347           | Rab6ip1        | 49            | 171             | 183              | 679            | 127            | 465              | 439               | 1361            |
| 19348           | Kif20a         | 9             | 82              | 25               | 2309           | 9              | 199              | 24                | 2898            |
| 19349           | Rab7           | 142           | 685             | 903              | 8492           | 160            | 728              | 917               | 8219            |
| 19352           | Rabggtb        | 121           | 319             | 1085             | 15006          | 107            | 237              | 937               | 14753           |
| 19353           | Rac1           | 522           | 4653            | 220              | 28193          | 387            | 3109             | 132               | 21223           |
| 19354           | Rac2           | 1239          | 10897           | 2528             | 23747          | 1278           | 9434             | 2396              | 22405           |
| 19355           | Rad1           | 46            | 100             | 116              | 217            | 42             | 98               | 106               | 158             |
| 19356           | Rad17          | 44            | 577             | 77               | 762            | 75             | 793              | 105               | 774             |
| 19357           | Rad21          | 362           | 2609            | 35               | 1294           | 329            | 1791             | 37                | 962             |
| 19358           | Rad23a         | 163           | 296             | 205              | 1075           | 128            | 212              | 214               | 804             |
| 19359           | Rad23b         | 141           | 1042            | 268              | 1563           | 148            | 1160             | 269               | 1434            |
| 19360           | Rad50          | 84            | 70              | 63               | 1492           | 92             | 82               | 66                | 1766            |

| NCBI<br>Gene ID | Gene<br>Symbol | Affy.<br>CD4+ | Agilent<br>CD4+ | Illumina<br>CD4+ | Nimbl.<br>CD4+ | Affy.<br>CD19+ | Agilent<br>CD19+ | Illumina<br>CD19+ | Nimbl.<br>CD19+ |
|-----------------|----------------|---------------|-----------------|------------------|----------------|----------------|------------------|-------------------|-----------------|
| 19361           | Rad51          | 8             | 17              | 23               | 89             | 12             | 70               | 27                | 213             |
| 19362           | Rad51ap1       | 6             | 13              | 35               | 275            | 6              | 40               | 57                | 875             |
| 19363           | Rad51l1        | 8             | 3               | 45               | 59             | 8              | 6                | 52                | 67              |
| 19364           | Rad51l3        | 74            | 101             | 226              | 2943           | 74             | 103              | 189               | 2895            |
| 19365           | Rad52          | 65            | 129             | 437              | 770            | 59             | 152              | 389               | 534             |
| 19366           | Rad54l         | 8             | 10              | 44               | 419            | 14             | 37               | 109               | 796             |
| 19367           | Rad9           | 86            | 477             | 385              | 1055           | 98             | 552              | 352               | 1240            |
| 19373           | Rag1           | 6             | 2               | 30               | 32             | 6              | 12               | 34                | 32              |
| 19376           | Rab34          | 7             | 5               | 24               | 23             | 7              | 5                | 25                | 30              |
| 19377           | Rai1           | 107           | 380             | 248              | 2186           | 61             | 177              | 142               | 1388            |
| 19378           | Aldh1a2        | 6             | 21              | 28               | 40             | 6              | 17               | 27                | 54              |
| 19383           | Raly           | 250           | 2845            | 1111             | 741            | 172            | 1625             | 636               | 318             |
| 19384           | Ran            | 168           | 5546            | 3469             | 11202          | 210            | 6050             | 3753              | 11299           |
| 19385           | Ranbp1         | 308           | 1940            | 1605             | 11139          | 360            | 2497             | 1809              | 11560           |
| 19386           | Ranbp2         | 189           | 827             | 128              | 1817           | 211            | 840              | 128               | 1904            |
| 19387           | Rangap1        | 106           | 697             | 1783             | 7426           | 81             | 514              | 1242              | 4819            |
| 19395           | Rasgrp2        | 500           | 3974            | 320              | 9427           | 444            | 5870             | 222               | 12038           |
| 19400           | Rapsn          | 9             | 4               | 34               | 53             | 8              | 3                | 28                | 47              |
| 19401           | Rara           | 83            | 11              | 30               | 39             | 80             | 15               | 31                | 44              |
| 19411           | Rarg           | 38            | 23              | 32               | 149            | 18             | 11               | 23                | 120             |
| 19414           | Rasa3          | 635           | 4843            | 2742             | 546            | 603            | 4266             | 2307              | 492             |
| 19415           | Rasal1         | 38            | 98              | 80               | 141            | 37             | 182              | 77                | 215             |
| 19416           | Rasd1          | 15            | 7               | 28               | 55             | 22             | 31               | 43                | 83              |
| 19417           | Rasgrf1        | 5             | 13              | 33               | 30             | 6              | 9                | 38                | 34              |
| 19419           | Rasgrp1        | 806           | 3233            | 7139             | 8396           | 394            | 1108             | 3640              | 3114            |
| 19428           | Rasl2-9        | 4             | 4252            | 28               | 526            | 4              | 3899             | 49                | 656             |
| 19434           | Rax            | 9             | 6               | 34               | 41             | 8              | 5                | 35                | 50              |
| 19645           | Rb1            | 203           | 366             | 204              | 957            | 308            | 475              | 373               | 1342            |
| 19646           | Rbbp4          | 346           | 2603            | 432              | 1215           | 349            | 2051             | 386               | 948             |
| 19647           | Rbbp6          | 207           | 875             | 172              | 11945          | 194            | 742              | 162               | 12382           |
| 19649           | Robo3          | 6             | 10              | 25               | 76             | 7              | 3                | 19                | 89              |
| 19650           | Rbl1           | 135           | 375             | 353              | 2633           | 95             | 221              | 228               | 1347            |
| 19651           | Rbl2           | 192           | 173             | 1035             | 668            | 156            | 116              | 902               | 521             |
| 19652           | Rbm3           | 559           | 3679            | 856              | 14320          | 632            | 4071             | 845               | 16377           |
| 19653           | Rbm4           | 122           | 734             | 282              | 2984           | 108            | 808              | 284               | 1995            |
| 19654           | Rbm6           | 105           | 1865            | 153              | 1358           | 94             | 1938             | 131               | 1023            |
| 19655           | Rbmx           | 87            | 398             | 275              | 3150           | 79             | 439              | 226               | 3366            |
| 19656           | Rbmxrt         | 204           | 1425            | 30               | 2467           | 272            | 1928             | 31                | 2923            |
| 19657           | Rbmy1a1        | 4             | 2               | 50               | 53             | 4              | 3                | 50                | 47              |
| 19659           | Rbp1           | 10            | 4               | 34               | 53             | 8              | 4                | 33                | 51              |
| 19660           | Rbp2           | 6             | 6               | 29               | 27             | 6              | 10               | 31                | 47              |
| 19661           | Rbp3           | 5             | 3               | 25               | 54             | 5              | 5                | 26                | 75              |
| 19662           | Rbp4           | 5             | 3               | 23               | 32             | 6              | 6                | 22                | 29              |
| 19663           | Rbpms          | 10            | 29              | 33               | 71             | 21             | 46               | 153               | 230             |
| 19671           | Rce1           | 60            | 913             | 272              | 456            | 55             | 1503             | 224               | 400             |
| 19672           | Rcn1           | 47            | 309             | 23               | 725            | 22             | 114              | 22                | 245             |
| 19674           | Rcvrn          | 5             | 4               | 40               | 24             | 5              | 7                | 36                | 25              |
| 19679           | Pitpnm2        | 131           | 251             | 778              | 253            | 95             | 109              | 400               | 176             |
| 19682           | Rdh5           | 20            | 306             | 197              | 1074           | 17             | 224              | 107               | 534             |
| 19684           | Rdx            | 203           | 427             | 324              | 7349           | 167            | 317              | 214               | 5554            |
| 19691           | Recql          | 87            | 145             | 106              | 3261           | 69             | 129              | 79                | 2849            |

| NCBI<br>Gene ID | Gene<br>Symbol | Affy.<br>CD4+ | Agilent<br>CD4+ | Illumina<br>CD4+ | Nimbl.<br>CD4+ | Affy.<br>CD19+ | Agilent<br>CD19+ | Illumina<br>CD19+ | Nimbl.<br>CD19+ |
|-----------------|----------------|---------------|-----------------|------------------|----------------|----------------|------------------|-------------------|-----------------|
| 19692           | Reg1           | 7             | 6               | 34               | 25             | 6              | 5                | 34                | 26              |
| 19693           | Reg2           | 4             | 2               | 27               | 20             | 4              | 3                | 27                | 26              |
| 19694           | Reg3a          | 4             | 2               | 34               | 22             | 5              | 2                | 35                | 23              |
| 19695           | Reg3g          | 4             | 2               | 29               | 18             | 5              | 3                | 29                | 25              |
| 19696           | Rel            | 211           | 2               | 51               | 241            | 781            | 3                | 119               | 846             |
| 19697           | Rela           | 177           | 1689            | 1606             | 353            | 179            | 1506             | 1635              | 343             |
| 19698           | Relb           | 57            | 573             | 140              | 535            | 109            | 1353             | 240               | 1073            |
| 19699           | Reln           | 8             | 7               | 38               | 27             | 10             | 19               | 76                | 37              |
| 19700           | Rem1           | 14            | 14              | 32               | 101            | 14             | 7                | 30                | 180             |
| 19701           | Ren2           | 11            | 4               | 33               | 36             | 11             | 7                | 31                | 70              |
| 19703           | Renbp          | 6             | 29              | 37               | 114            | 14             | 207              | 233               | 515             |
| 19707           | Reps1          | 139           | 255             | 30               | 955            | 90             | 128              | 26                | 566             |
| 19708           | Dpf2           | 204           | 986             | 18               | 357            | 192            | 863              | 18                | 436             |
| 19711           | Resp18         | 5             | 2               | 28               | 21             | 5              | 5                | 28                | 27              |
| 19712           | Rest           | 93            | 730             | 18               | 66             | 141            | 922              | 20                | 66              |
| 19713           | Ret            | 7             | 4               | 26               | 364            | 7              | 7                | 27                | 336             |
| 19714           | Rev3l          | 233           | 1410            | 319              | 4982           | 149            | 597              | 202               | 2381            |
| 19718           | Rfc2           | 61            | 2067            | 511              | 2700           | 103            | 4176             | 1027              | 3857            |
| 19719           | Rfng           | 44            | 14              | 737              | 109            | 36             | 14               | 631               | 88              |
| 19720           | Trim27         | 140           | 168             | 1728             | 4038           | 143            | 175              | 1616              | 3713            |
| 19724           | Rfx1           | 112           | 596             | 122              | 2439           | 73             | 331              | 73                | 1924            |
| 19725           | Rfx2           | 18            | 9               | 123              | 96             | 17             | 5                | 102               | 66              |
| 19726           | Rfx3           | 90            | 22              | 54               | 355            | 70             | 13               | 50                | 175             |
| 19727           | Rfxank         | 55            | 266             | 71               | 985            | 58             | 306              | 70                | 897             |
| 19730           | Ralgds         | 25            | 280             | 31               | 307            | 49             | 748              | 29                | 1061            |
| 19731           | Rgl1           | 8             | 15              | 33               | 33             | 24             | 83               | 129               | 81              |
| 19732           | Rgl2           | 158           | 2024            | 284              | 581            | 134            | 1613             | 187               | 413             |
| 19733           | Rgn            | 5             | 9               | 28               | 16             | 4              | 5                | 27                | 18              |
| 19734           | Rgs16          | 14            | 41              | 53               | 164            | 12             | 30               | 24                | 106             |
| 19735           | Rgs2           | 60            | 2357            | 46               | 10237          | 102            | 3940             | 52                | 15694           |
| 19736           | Rgs4           | 5             | 3               | 25               | 193            | 5              | 3                | 27                | 202             |
| 19737           | Rgs5           | 6             | 7               | 24               | 19             | 5              | 5                | 26                | 22              |
| 19739           | Rgs9           | 10            | 5               | 31               | 52             | 10             | 4                | 29                | 44              |
| 19743           | Rhag           | 5             | 2               | 29               | 19             | 4              | 3                | 30                | 21              |
| 19744           | Rheb           | 64            | 1612            | 28               | 6350           | 53             | 1326             | 27                | 5754            |
| 19752           | Rnase1         | 5             | 37              | 19               | 27             | 5              | 49               | 23                | 28              |
| 19762           | Rit2           | 5             | 12              | 30               | 26             | 6              | 12               | 32                | 21              |
| 19763           | Ring1          | 60            | 74              | 25               | 84             | 66             | 114              | 25                | 130             |
| 19765           | Ralbp1         | 126           | 672             | 1414             | 4125           | 106            | 590              | 1195              | 3030            |
| 19766           | Ripk1          | 120           | 200             | 369              | 2114           | 88             | 130              | 307               | 1506            |
| 19769           | Rit1           | 48            | 1142            | 477              | 1144           | 37             | 1096             | 485               | 1224            |
| 19771           | Rlbp1          | 6             | 2               | 40               | 56             | 6              | 3                | 37                | 62              |
| 19773           | Rln1           | 11            | 3               | 19               | 42             | 11             | 5                | 24                | 38              |
| 19775           | Xpr1           | 71            | 511             | 55               | 1994           | 89             | 581              | 67                | 1840            |
| 19777           | C80913         | 154           | 262             | 269              | 5263           | 140            | 183              | 255               | 3518            |
| 19819           | Rnaseh1        | 34            | 310             | 217              | 583            | 35             | 404              | 231               | 629             |
| 19820           | Rnf12          | 153           | 579             | 39               | 1819           | 190            | 767              | 47                | 1357            |
| 19821           | Rnf2           | 89            | 486             | 59               | 3673           | 90             | 444              | 61                | 4549            |
| 19822           | Rnf4           | 301           | 481             | 176              | 1329           | 312            | 446              | 184               | 1175            |
| 19823           | Rnf7           | 94            | 1183            | 915              | 5083           | 87             | 998              | 932               | 1988            |
| 19824           | Trim10         | 7             | 23              | 39               | 45             | 7              | 22               | 32                | 43              |

| NCBI<br>Gene ID | Gene<br>Symbol | Affy.<br>CD4+ | Agilent<br>CD4+ | Illumina<br>CD4+ | Nimbl.<br>CD4+ | Affy.<br>CD19+ | Agilent<br>CD19+ | Illumina<br>CD19+ | Nimbl.<br>CD19+ |
|-----------------|----------------|---------------|-----------------|------------------|----------------|----------------|------------------|-------------------|-----------------|
| 19826           | Rnps1          | 106           | 1784            | 523              | 2814           | 109            | 1910             | 500               | 3410            |
| 19876           | Robo1          | 10            | 10              | 34               | 60             | 9              | 11               | 28                | 90              |
| 19877           | Rock1          | 256           | 1207            | 1478             | 5444           | 240            | 892              | 1560              | 4785            |
| 19878           | Rock2          | 95            | 19              | 29               | 41             | 137            | 31               | 37                | 57              |
| 19879           | Slc22a8        | 9             | 67              | 22               | 36             | 10             | 76               | 23                | 32              |
| 19882           | Mst1r          | 9             | 6               | 25               | 101            | 11             | 4                | 29                | 111             |
| 19883           | Rora           | 16            | 29              | 94               | 4064           | 9              | 3                | 26                | 103             |
| 19885           | Rorc           | 9             | 4               | 25               | 30             | 9              | 3                | 22                | 133             |
| 19886           | Ros1           | 6             | 2               | 22               | 30             | 6              | 3                | 18                | 39              |
| 19888           | Rp1h           | 4             | 2               | 28               | 24             | 4              | 4                | 34                | 20              |
| 19889           | Rp2h           | 31            | 21              | 91               | 1163           | 75             | 75               | 308               | 3411            |
| 19891           | Rpa2           | 62            | 274             | 135              | 548            | 64             | 329              | 132               | 497             |
| 19892           | Rpe65          | 4             | 2               | 23               | 16             | 4              | 5                | 18                | 16              |
| 19893           | Rpgr           | 11            | 12              | 40               | 133            | 16             | 22               | 40                | 215             |
| 19894           | Rph3a          | 14            | 24              | 18               | 43             | 14             | 33               | 23                | 63              |
| 19896           | Rpl10a         | 2082          | 8530            | 10030            | 38866          | 1975           | 6277             | 8300              | 37827           |
| 19899           | Rpl18          | 1275          | 11188           | 9474             | 24794          | 1135           | 11678            | 8046              | 22077           |
| 19921           | Rpl19          | 2505          | 42633           | 13758            | 40185          | 2285           | 30682            | 12385             | 35602           |
| 19934           | Rpl22          | 130           | 18476           | 733              | 34164          | 140            | 16776            | 875               | 29605           |
| 19935           | Mrpl23         | 86            | 2887            | 1646             | 2503           | 113            | 3748             | 1726              | 3654            |
| 19942           | Rpl27          | 907           | 45810           | 13440            | 22610          | 841            | 39807            | 12292             | 23895           |
| 19943           | Rpl28          | 2079          | 16612           | 14560            | 25314          | 2090           | 17119            | 12860             | 25461           |
| 19944           | Rpl29          | 923           | 4930            | 1870             | 28591          | 828            | 6098             | 1100              | 33320           |
| 19946           | Rpl30          | 3735          | 17489           | 14168            | 30765          | 3133           | 12880            | 12953             | 30609           |
| 19951           | Rpl32          | 1643          | 56946           | 11860            | 40051          | 1618           | 68263            | 11177             | 40469           |
| 19982           | Rpl36a         | 1171          | 18631           | 13362            | 29153          | 971            | 14941            | 12224             | 31089           |
| 19983           | Rpl5           | 2312          | 49729           | 12095            | 43237          | 1668           | 42131            | 11456             | 39932           |
| 19989           | Rpl7           | 1184          | 34223           | 9128             | 38771          | 1084           | 33081            | 7928              | 36233           |
| 20005           | Rpl9           | 2681          | 45218           | 13133            | 39577          | 2425           | 39987            | 14567             | 39466           |
| 20016           | Rpo1-1         | 94            | 1387            | 367              | 2435           | 105            | 1353             | 372               | 2154            |
| 20017           | Rpo1-2         | 86            | 251             | 390              | 955            | 93             | 210              | 319               | 866             |
| 20018           | Rpo1-3         | 188           | 1269            | 2044             | 8411           | 179            | 1201             | 1883              | 7870            |
| 20019           | Rpo1-4         | 134           | 731             | 762              | 4691           | 114            | 634              | 637               | 3914            |
| 20020           | Polr2a         | 214           | 142             | 425              | 3736           | 239            | 132              | 490               | 4494            |
| 20021           | Polr2c         | 76            | 1144            | 22               | 537            | 76             | 1076             | 27                | 740             |
| 20022           | Polr2j         | 79            | 713             | 1168             | 5507           | 79             | 941              | 1190              | 5267            |
| 20028           | Pdc            | 5             | 2               | 30               | 25             | 5              | 3                | 32                | 36              |
| 20042           | Rps12          | 1777          | 88899           | 14017            | 28111          | 1863           | 131987           | 14808             | 29789           |
| 20044           | Rps14          | 2901          | 98530           | 16846            | 45588          | 2448           | 103864           | 17350             | 42750           |
| 20054           | Rps15          | 2487          | 5631            | 7803             | 19538          | 2185           | 6301             | 6308              | 20905           |
| 20055           | Rps16          | 3279          | 104871          | 15304            | 43050          | 2509           | 95004            | 13188             | 38565           |
| 20068           | Rps17          | 1275          | 17744           | 14722            | 20764          | 1008           | 15225            | 12984             | 20392           |
| 20084           | Rps18          | 3462          | 145777          | 12301            | 24139          | 2828           | 167452           | 12244             | 25014           |
| 20085           | Rps19          | 659           | 82712           | 64               | 39391          | 619            | 84074            | 81                | 37480           |
| 20088           | Rps24          | 865           | 53659           | 291              | 36803          | 721            | 44404            | 310               | 36659           |
| 20090           | Rps29          | 2823          | 71802           | 16376            | 33105          | 2285           | 60191            | 15034             | 32113           |
| 20091           | Rps3a          | 2994          | 25350           | 6814             | 39903          | 2532           | 21248            | 6087              | 36358           |
| 20102           | Rps4x          | 3308          | 68876           | 13763            | 35519          | 3039           | 69553            | 11479             | 31653           |
| 20103           | Rps5           | 1130          | 26058           | 17029            | 26987          | 1085           | 23766            | 16898             | 25305           |
| 20104           | Rps6           | 2559          | 16340           | 10530            | 44564          | 2220           | 15087            | 9283              | 35197           |
| 20111           | Rps6ka1        | 232           | 1307            | 158              | 1489           | 123            | 571              | 75                | 748             |

| NCBI Gene ID | Gene Symbol | Affy. CD4+ | Agilent CD4+ | Illumina CD4+ | Nimbl. CD4+ | Affy. CD19+ | Agilent CD19+ | Illumina CD19+ | Nimbl. CD19+ |
|--------------|-------------|------------|--------------|---------------|-------------|-------------|---------------|----------------|--------------|
| 20112        | Rps6ka2     | 13         | 7            | 95            | 257         | 10          | 3             | 65             | 75           |
| 20115        | Rps7        | 2495       | 68720        | 15832         | 20550       | 2119        | 60489         | 15124          | 18468        |
| 20116        | Rps8        | 1595       | 39897        | 18048         | 37918       | 1414        | 32581         | 16552          | 37198        |
| 20128        | Trim30      | 338        | 524          | 1094          | 4003        | 441         | 659           | 1419           | 4358         |
| 20129        | Rptn        | 5          | 3            | 34            | 20          | 4           | 3             | 30             | 15           |
| 20130        | Rras        | 42         | 203          | 141           | 1157        | 51          | 308           | 254            | 2033         |
| 20132        | Rrh         | 5          | 3            | 25            | 42          | 5           | 3             | 23             | 48           |
| 20133        | Rrm1        | 66         | 249          | 142           | 319         | 115         | 633           | 222            | 583          |
| 20135        | Rrm2        | 10         | 77           | 48            | 292         | 18          | 210           | 71             | 736          |
| 20148        | Dhrs3       | 11         | 26           | 26            | 234         | 15          | 51            | 29             | 340          |
| 20163        | Rsu1        | 221        | 272          | 186           | 4076        | 157         | 131           | 136            | 2465         |
| 20166        | Rtkn        | 10         | 8            | 25            | 36          | 10          | 6             | 29             | 57           |
| 20167        | Rtn2        | 7          | 156          | 25            | 58          | 7           | 10            | 25             | 46           |
| 20168        | Rtn3        | 324        | 994          | 405           | 1772        | 349         | 958           | 388            | 1252         |
| 20170        | Hps6        | 24         | 422          | 274           | 195         | 17          | 450           | 255            | 194          |
| 20174        | Ruvbl2      | 77         | 345          | 192           | 644         | 72          | 438           | 217            | 661          |
| 20181        | Rxra        | 21         | 117          | 25            | 132         | 13          | 15            | 22             | 74           |
| 20182        | Rxrb        | 102        | 488          | 950           | 361         | 101         | 700           | 1122           | 465          |
| 20183        | Rxrg        | 5          | 6            | 23            | 23          | 5           | 6             | 25             | 30           |
| 20185        | Ncor1       | 452        | 2003         | 1514          | 5632        | 339         | 1128          | 1026           | 3702         |
| 20186        | Nr1h4       | 4          | 9            | 25            | 31          | 5           | 10            | 27             | 35           |
| 20187        | Ryk         | 6          | 24           | 293           | 53          | 7           | 24            | 222            | 57           |
| 20190        | Ryr1        | 10         | 168          | 25            | 44          | 10          | 173           | 244            | 133          |
| 20191        | Ryr2        | 8          | 5            | 26            | 15          | 8           | 9             | 35             | 22           |
| 20192        | Ryr3        | 7          | 28           | 32            | 88          | 6           | 26            | 30             | 21           |
| 20193        | S100a1      | 7          | 16           | 24            | 61          | 7           | 22            | 27             | 61           |
| 20194        | S100a10     | 366        | 3013         | 2113          | 8002        | 375         | 2746          | 2175           | 9431         |
| 20195        | S100a11     | 152        | 231          | 107           | 5187        | 333         | 521           | 227            | 10025        |
| 20196        | S100a13     | 55         | 932          | 511           | 672         | 39          | 616           | 286            | 599          |
| 20197        | S100a3      | 6          | 30           | 30            | 206         | 5           | 30            | 30             | 128          |
| 20198        | S100a4      | 9          | 438          | 77            | 522         | 7           | 77            | 30             | 91           |
| 20199        | S100a5      | 6          | 13           | 25            | 41          | 6           | 10            | 18             | 55           |
| 20200        | S100a6      | 9          | 211          | 328           | 856         | 10          | 326           | 551            | 1836         |
| 20201        | S100a8      | 5          | 3            | 22            | 22          | 6           | 3             | 27             | 51           |
| 20202        | S100a9      | 8          | 8            | 21            | 39          | 8           | 9             | 24             | 94           |
| 20204        | Prrx2       | 7          | 7            | 41            | 82          | 8           | 7             | 44             | 56           |
| 20208        | Saa1        | 4          | 205          | 22            | 24          | 4           | 165           | 23             | 27           |
| 20209        | Saa2        | 5          | 8            | 28            | 56          | 5           | 8             | 29             | 57           |
| 20210        | Saa3        | 5          | 2            | 34            | 21          | 5           | 3             | 38             | 37           |
| 20211        | Saa4        | 4          | 5            | 32            | 25          | 4           | 10            | 26             | 24           |
| 20215        | Sag         | 36         | 23           | 227           | 582         | 22          | 9             | 99             | 292          |
| 20218        | Khdrbs1     | 235        | 2176         | 301           | 1810        | 198         | 1682          | 235            | 1163         |
| 20219        | Apcs        | 4          | 18           | 21            | 63          | 4           | 30            | 30             | 84           |
| 20220        | Sap18       | 47         | 1415         | 199           | 14760       | 48          | 1129          | 196            | 11324        |
| 20222        | Sf3a2       | 82         | 42           | 75            | 43          | 82          | 28            | 72             | 52           |
| 20227        | Sart1       | 108        | 3242         | 190           | 3062        | 88          | 3076          | 134            | 2689         |
| 20229        | Sat1        | 164        | 496          | 1251          | 807         | 192         | 550           | 1284           | 747          |
| 20230        | Satb1       | 2111       | 5798         | 7753          | 12797       | 577         | 1079          | 2258           | 2965         |
| 20231        | Nkx1-2      | 19         | 49           | 25            | 80          | 16          | 56            | 26             | 71           |
| 20234        | Sbp         | 5          | 10           | 30            | 91          | 5           | 7             | 31             | 117          |
| 20249        | Scd1        | 9          | 10           | 26            | 39          | 1056        | 3008          | 6264           | 36234        |

| NCBI<br>Gene ID | Gene<br>Symbol | Affy.<br>CD4+ | Agilent<br>CD4+ | Illumina<br>CD4+ | Nimbl.<br>CD4+ | Affy.<br>CD19+ | Agilent<br>CD19+ | Illumina<br>CD19+ | Nimbl.<br>CD19+ |
|-----------------|----------------|---------------|-----------------|------------------|----------------|----------------|------------------|-------------------|-----------------|
| 20250           | Scd2           | 74            | 335             | 901              | 2382           | 107            | 554              | 1516              | 3506            |
| 20254           | Scg2           | 7             | 2               | 21               | 20             | 7              | 3                | 24                | 25              |
| 20255           | Scg3           | 5             | 16              | 33               | 26             | 5              | 14               | 34                | 28              |
| 20257           | Stmn2          | 6             | 8               | 20               | 44             | 6              | 5                | 19                | 22              |
| 20259           | Scin           | 4             | 2               | 19               | 22             | 4              | 5                | 20                | 28              |
| 20262           | Stmn3          | 12            | 24              | 24               | 81             | 12             | 14               | 29                | 83              |
| 20264           | Scn10a         | 6             | 60              | 24               | 34             | 6              | 51               | 24                | 33              |
| 20265           | Scn1a          | 4             | 2               | 23               | 55             | 4              | 3                | 24                | 72              |
| 20266           | Scn1b          | 20            | 12              | 29               | 34             | 13             | 9                | 26                | 26              |
| 20269           | Scn3a          | 4             | 2               | 38               | 73             | 4              | 3                | 39                | 69              |
| 20271           | Scn5a          | 11            | 40              | 38               | 66             | 10             | 28               | 34                | 62              |
| 20272           | Scn7a          | 5             | 2               | 28               | 18             | 5              | 3                | 23                | 26              |
| 20273           | Scn8a          | 6             | 13              | 31               | 40             | 6              | 8                | 28                | 51              |
| 20274           | Scn9a          | 5             | 3               | 18               | 22             | 5              | 4                | 22                | 28              |
| 20276           | Scnn1a         | 5             | 5               | 26               | 24             | 5              | 4                | 28                | 21              |
| 20277           | Scnn1b         | 6             | 7               | 31               | 50             | 7              | 7                | 34                | 70              |
| 20278           | Scnn1g         | 6             | 5               | 23               | 27             | 7              | 5                | 26                | 19              |
| 20280           | Scp2           | 44            | 836             | 2236             | 10951          | 25             | 585              | 1239              | 6872            |
| 20284           | Scrg1          | 4             | 8               | 23               | 111            | 4              | 7                | 21                | 203             |
| 20287           | Sct            | 13            | 14              | 29               | 35             | 15             | 17               | 28                | 41              |
| 20288           | Msr1           | 5             | 4               | 27               | 163            | 4              | 6                | 29                | 215             |
| 20289           | Scx            | 18            | 21              | 29               | 180            | 16             | 18               | 34                | 125             |
| 20290           | Ccl1           | 5             | 3               | 26               | 31             | 6              | 3                | 29                | 37              |
| 20292           | Ccl11          | 9             | 2               | 24               | 24             | 10             | 3                | 20                | 31              |
| 20293           | Ccl12          | 5             | 7               | 30               | 18             | 5              | 7                | 31                | 20              |
| 20295           | Ccl17          | 9             | 13              | 27               | 36             | 8              | 22               | 36                | 75              |
| 20296           | Ccl2           | 7             | 9               | 21               | 56             | 8              | 7                | 21                | 97              |
| 20297           | Ccl20          | 7             | 4               | 26               | 22             | 8              | 5                | 26                | 77              |
| 20299           | Ccl22          | 7             | 2               | 36               | 48             | 6              | 3                | 36                | 111             |
| 20300           | Ccl25          | 8             | 119             | 51               | 924            | 9              | 48               | 39                | 353             |
| 20301           | Ccl27          | 19            | 35              | 45               | 281            | 18             | 48               | 54                | 463             |
| 20302           | Ccl3           | 7             | 2               | 19               | 34             | 9              | 7                | 27                | 141             |
| 20303           | Ccl4           | 10            | 9               | 26               | 36             | 11             | 20               | 52                | 71              |
| 20304           | Ccl5           | 11            | 146             | 77               | 454            | 8              | 22               | 26                | 35              |
| 20305           | Ccl6           | 6             | 2               | 26               | 55             | 6              | 5                | 25                | 88              |
| 20306           | Ccl7           | 13            | 6               | 28               | 35             | 15             | 4                | 32                | 30              |
| 20307           | Ccl8           | 5             | 7               | 25               | 24             | 4              | 10               | 25                | 24              |
| 20309           | Cxcl15         | 4             | 6               | 23               | 32             | 4              | 4                | 21                | 26              |
| 20310           | Cxcl2          | 4             | 3               | 21               | 29             | 5              | 4                | 22                | 24              |
| 20311           | Cxcl5          | 5             | 2               | 23               | 17             | 5              | 2                | 23                | 18              |
| 20312           | Cx3cl1         | 13            | 3               | 30               | 31             | 14             | 5                | 31                | 34              |
| 20315           | Cxcl12         | 7             | 11              | 33               | 66             | 6              | 6                | 28                | 54              |
| 20316           | Sdf2           | 79            | 2243            | 484              | 4188           | 117            | 2455             | 544               | 4560            |
| 20317           | Serpinf1       | 12            | 13              | 81               | 44             | 13             | 17               | 85                | 47              |
| 20318           | Sdf4           | 179           | 2230            | 403              | 996            | 127            | 1420             | 236               | 622             |
| 20319           | Sfrp2          | 7             | 14              | 44               | 51             | 5              | 8                | 20                | 32              |
| 20324           | Sdpr           | 5             | 10              | 25               | 24             | 5              | 11               | 22                | 31              |
| 20334           | Sec23a         | 59            | 48              | 215              | 651            | 59             | 44               | 267               | 719             |
| 20335           | Sec61g         | 111           | 2922            | 1401             | 4891           | 117            | 3435             | 1438              | 5709            |
| 20339           | Sele           | 16            | 2               | 25               | 32             | 15             | 3                | 28                | 25              |
| 20340           | Glg1           | 186           | 1491            | 2266             | 1489           | 184            | 775              | 1848              | 950             |

| NCBI Gene ID | Gene Symbol | Affy. CD4+ | Agilent CD4+ | Illumina CD4+ | Nimbl. CD4+ | Affy. CD19+ | Agilent CD19+ | Illumina CD19+ | Nimbl. CD19+ |
|--------------|-------------|------------|--------------|---------------|-------------|-------------|---------------|----------------|--------------|
| 20341        | Selenbp1    | 9          | 30           | 36            | 76          | 10          | 91            | 47             | 167          |
| 20343        | Sell        | 1034       | 2858         | 788           | 19424       | 1067        | 2802          | 657            | 17963        |
| 20344        | Selp        | 6          | 60           | 31            | 42          | 6           | 45            | 36             | 53           |
| 20346        | Sema3a      | 5          | 3            | 29            | 28          | 5           | 3             | 26             | 36           |
| 20347        | Sema3b      | 19         | 2            | 24            | 31          | 17          | 7             | 26             | 31           |
| 20348        | Sema3c      | 5          | 3            | 27            | 16          | 6           | 3             | 28             | 19           |
| 20349        | Sema3e      | 6          | 2            | 33            | 47          | 6           | 3             | 28             | 53           |
| 20350        | Sema3f      | 22         | 9            | 27            | 29          | 23          | 16            | 23             | 41           |
| 20351        | Sema4a      | 141        | 1144         | 2635          | 666         | 11          | 55            | 57             | 24           |
| 20352        | Sema4b      | 91         | 25           | 1598          | 246         | 203         | 50            | 2884           | 256          |
| 20354        | Sema4d      | 219        | 232          | 59            | 672         | 214         | 235           | 45             | 526          |
| 20355        | Sema4f      | 40         | 111          | 160           | 667         | 11          | 3             | 25             | 54           |
| 20356        | Sema5a      | 5          | 12           | 53            | 21          | 10          | 28            | 74             | 224          |
| 20357        | Sema5b      | 13         | 303          | 106           | 75          | 13          | 271           | 88             | 107          |
| 20358        | Sema6a      | 7          | 18           | 50            | 73          | 7           | 12            | 44             | 64           |
| 20359        | Sema6b      | 11         | 25           | 34            | 134         | 11          | 36            | 43             | 244          |
| 20360        | Sema6c      | 9          | 30           | 30            | 65          | 10          | 39            | 31             | 55           |
| 20361        | Sema7a      | 20         | 19           | 33            | 51          | 88          | 276           | 32             | 80           |
| 20362        | 8-Sep       | 6          | 109          | 27            | 90          | 7           | 61            | 26             | 30           |
| 20363        | Sepp1       | 131        | 6225         | 734           | 4749        | 23          | 716           | 121            | 832          |
| 20364        | Sepw1       | 415        | 2214         | 616           | 284         | 327         | 1572          | 409            | 262          |
| 20365        | Serf1       | 10         | 169          | 144           | 2496        | 9           | 96            | 93             | 2141         |
| 20370        | Sez6        | 11         | 14           | 23            | 77          | 12          | 15            | 28             | 89           |
| 20371        | Foxp3       | 52         | 49           | 190           | 292         | 12          | 4             | 20             | 81           |
| 20375        | Sfpi1       | 9          | 5            | 35            | 17          | 105         | 26            | 138            | 911          |
| 20377        | Sfrp1       | 5          | 2            | 33            | 88          | 5           | 3             | 31             | 26           |
| 20378        | Frzb        | 5          | 2            | 29            | 18          | 5           | 3             | 29             | 16           |
| 20379        | Sfrp4       | 4          | 6            | 20            | 32          | 5           | 3             | 22             | 31           |
| 20382        | Sfrs2       | 431        | 2783         | 3659          | 7232        | 409         | 2863          | 3742           | 6222         |
| 20383        | Sfrs3       | 57         | 26           | 116           | 8921        | 63          | 33            | 169            | 9682         |
| 20384        | Sfrs5       | 857        | 2358         | 686           | 23633       | 797         | 1757          | 545            | 17981        |
| 20387        | Sftpa1      | 10         | 3            | 17            | 20          | 9           | 4             | 23             | 33           |
| 20388        | Sftpb       | 14         | 4            | 22            | 50          | 12          | 5             | 26             | 37           |
| 20389        | Sftpc       | 5          | 3            | 22            | 32          | 6           | 4             | 20             | 31           |
| 20390        | Sftpd       | 9          | 4            | 22            | 23          | 8           | 4             | 29             | 30           |
| 20391        | Sgca        | 8          | 3            | 34            | 40          | 8           | 5             | 33             | 46           |
| 20392        | Sgce        | 6          | 10           | 20            | 101         | 7           | 17            | 22             | 72           |
| 20393        | Sgk         | 59         | 1819         | 1886          | 9119        | 27          | 389           | 626            | 2036         |
| 20397        | Sgpl1       | 111        | 357          | 142           | 458         | 144         | 477           | 172            | 513          |
| 20400        | Sh2d1a      | 67         | 724          | 580           | 3870        | 6           | 14            | 28             | 25           |
| 20401        | Sh3bp1      | 166        | 1666         | 77            | 431         | 60          | 442           | 50             | 210          |
| 20402        | Zfp106      | 96         | 202          | 219           | 635         | 162         | 273           | 331            | 515          |
| 20404        | Sh3gl2      | 11         | 6            | 27            | 25          | 10          | 3             | 22             | 27           |
| 20405        | Sh3gl1      | 152        | 1275         | 644           | 767         | 106         | 601           | 316            | 374          |
| 20408        | Sh3gl3      | 9          | 73           | 36            | 251         | 7           | 24            | 24             | 26           |
| 20409        | Ostf1       | 195        | 952          | 1026          | 16277       | 233         | 1328          | 1175           | 17590        |
| 20411        | Sorbs1      | 23         | 308          | 47            | 723         | 16          | 159           | 44             | 412          |
| 20415        | Shbg        | 6          | 3            | 23            | 26          | 6           | 4             | 22             | 27           |
| 20416        | Shc1        | 96         | 92           | 31            | 1148        | 87          | 82            | 37             | 834          |
| 20418        | Shc3        | 8          | 29           | 26            | 46          | 8           | 30            | 24             | 44           |
| 20419        | Shcbp1      | 5          | 13           | 35            | 62          | 7           | 37            | 33             | 108          |

| NCBI<br>Gene ID | Gene<br>Symbol | Affy.<br>CD4+ | Agilent<br>CD4+ | Illumina<br>CD4+ | Nimbl.<br>CD4+ | Affy.<br>CD19+ | Agilent<br>CD19+ | Illumina<br>CD19+ | Nimbl.<br>CD19+ |
|-----------------|----------------|---------------|-----------------|------------------|----------------|----------------|------------------|-------------------|-----------------|
| 20420           | Shd            | 19            | 31              | 52               | 30             | 18             | 22               | 51                | 68              |
| 20423           | Shh            | 9             | 2               | 28               | 30             | 9              | 3                | 32                | 24              |
| 20425           | Shmt1          | 27            | 47              | 70               | 475            | 26             | 39               | 107               | 633             |
| 20429           | Shox2          | 4             | 2               | 31               | 25             | 4              | 3                | 34                | 27              |
| 20430           | Cyfp1          | 14            | 57              | 90               | 1254           | 36             | 317              | 320               | 6127            |
| 20431           | Si             | 56            | 17              | 30               | 1125           | 22             | 17               | 32                | 284             |
| 20437           | Siah1a         | 95            | 68              | 936              | 8724           | 50             | 19               | 458               | 5469            |
| 20438           | Siah1b         | 8             | 174             | 57               | 1508           | 11             | 67               | 72                | 855             |
| 20439           | Siah2          | 68            | 109             | 77               | 841            | 66             | 179              | 98                | 934             |
| 20440           | St6gal1        | 214           | 1089            | 4332             | 23587          | 239            | 1131             | 5019              | 26038           |
| 20447           | St6galnac3     | 10            | 12              | 36               | 45             | 13             | 26               | 39                | 57              |
| 20459           | Ptk6           | 8             | 14              | 25               | 44             | 8              | 15               | 24                | 42              |
| 20462           | Sfrs10         | 562           | 655             | 300              | 14316          | 501            | 683              | 278               | 12167           |
| 20463           | Cox7a2l        | 344           | 2062            | 4106             | 28637          | 258            | 1185             | 2832              | 21141           |
| 20464           | Sim1           | 10            | 2               | 23               | 58             | 8              | 3                | 22                | 69              |
| 20465           | Sim2           | 7             | 3               | 21               | 18             | 6              | 3                | 23                | 18              |
| 20466           | Sin3a          | 185           | 569             | 824              | 2399           | 192            | 629              | 789               | 1523            |
| 20467           | Sin3b          | 127           | 4357            | 834              | 5802           | 117            | 4230             | 787               | 5772            |
| 20469           | Sipa1          | 263           | 1397            | 292              | 302            | 616            | 4031             | 560               | 544             |
| 20471           | Six1           | 5             | 18              | 20               | 66             | 4              | 13               | 21                | 99              |
| 20472           | Six2           | 17            | 9               | 27               | 79             | 15             | 6                | 25                | 69              |
| 20473           | Six3           | 12            | 10              | 28               | 55             | 11             | 13               | 33                | 73              |
| 20474           | Six4           | 5             | 2               | 33               | 17             | 6              | 3                | 34                | 18              |
| 20475           | Six5           | 9             | 5               | 30               | 80             | 10             | 5                | 31                | 75              |
| 20476           | Six6           | 6             | 2               | 21               | 29             | 6              | 3                | 20                | 40              |
| 20479           | Vps4b          | 276           | 912             | 66               | 10648          | 299            | 901              | 65                | 9008            |
| 20481           | Ski            | 262           | 1278            | 539              | 4103           | 88             | 301              | 167               | 1440            |
| 20482           | Skil           | 111           | 502             | 22               | 81             | 119            | 469              | 21                | 71              |
| 20491           | Sla            | 250           | 887             | 1530             | 5019           | 356            | 1533             | 2549              | 6351            |
| 20492           | Slbp           | 75            | 710             | 22               | 2608           | 86             | 1143             | 21                | 3503            |
| 20493           | Slc10a1        | 9             | 10              | 38               | 91             | 9              | 8                | 37                | 54              |
| 20494           | Slc10a2        | 4             | 2               | 27               | 21             | 4              | 3                | 23                | 29              |
| 20495           | Slc12a1        | 5             | 3               | 36               | 24             | 5              | 5                | 35                | 27              |
| 20496           | Slc12a2        | 31            | 28              | 182              | 290            | 31             | 23               | 147               | 168             |
| 20497           | Slc12a3        | 15            | 5               | 29               | 68             | 15             | 6                | 32                | 89              |
| 20498           | Slc12a4        | 32            | 115             | 27               | 136            | 34             | 129              | 26                | 145             |
| 20499           | Slc12a7        | 281           | 2066            | 360              | 2935           | 22             | 148              | 35                | 213             |
| 20500           | Slc13a2        | 7             | 5               | 23               | 48             | 6              | 5                | 23                | 29              |
| 20501           | Slc16a1        | 50            | 302             | 22               | 747            | 26             | 161              | 25                | 282             |
| 20502           | Slc16a2        | 13            | 66              | 31               | 57             | 11             | 44               | 29                | 55              |
| 20503           | Slc16a7        | 7             | 3               | 24               | 19             | 29             | 39               | 26                | 174             |
| 20504           | Slc17a1        | 8             | 3               | 24               | 19             | 7              | 4                | 25                | 20              |
| 20505           | Slc34a1        | 11            | 3               | 16               | 74             | 11             | 6                | 29                | 88              |
| 20508           | Slc18a3        | 12            | 3               | 30               | 33             | 14             | 10               | 33                | 21              |
| 20509           | Slc19a1        | 56            | 356             | 306              | 362            | 53             | 238              | 225               | 233             |
| 20510           | Slc1a1         | 6             | 8               | 24               | 23             | 6              | 8                | 36                | 22              |
| 20511           | Slc1a2         | 9             | 9               | 25               | 37             | 9              | 11               | 23                | 47              |
| 20512           | Slc1a3         | 9             | 5               | 32               | 12             | 8              | 3                | 33                | 20              |
| 20513           | Slc1a6         | 6             | 16              | 32               | 25             | 7              | 13               | 31                | 30              |
| 20514           | Slc1a5         | 279           | 1965            | 421              | 3803           | 389            | 2652             | 521               | 4096            |
| 20515           | Slc20a1        | 329           | 1655            | 616              | 1669           | 114            | 409              | 183               | 341             |



| NCBI Gene ID | Gene Symbol | Affy. CD4+ | Agilent CD4+ | Illumina CD4+ | Nimbl. CD4+ | Affy. CD19+ | Agilent CD19+ | Illumina CD19+ | Nimbl. CD19+ |
|--------------|-------------|------------|--------------|---------------|-------------|-------------|---------------|----------------|--------------|
| 20516        | Slc20a2     | 37         | 28           | 150           | 63          | 79          | 33            | 298            | 119          |
| 20517        | Slc22a1     | 9          | 14           | 27            | 35          | 8           | 15            | 25             | 31           |
| 20518        | Slc22a2     | 8          | 5            | 28            | 104         | 8           | 3             | 37             | 91           |
| 20519        | Slc22a3     | 6          | 3            | 19            | 26          | 7           | 3             | 21             | 38           |
| 20520        | Slc22a5     | 24         | 75           | 88            | 243         | 29          | 57            | 71             | 209          |
| 20521        | Slc22a12    | 19         | 439          | 32            | 152         | 21          | 483           | 34             | 122          |
| 20522        | Slc23a1     | 11         | 6            | 45            | 27          | 11          | 52            | 50             | 164          |
| 20523        | Slc25a14    | 16         | 204          | 110           | 158         | 14          | 181           | 103            | 128          |
| 20524        | Slc25a17    | 71         | 900          | 387           | 1101        | 69          | 1071          | 386            | 870          |
| 20525        | Slc2a1      | 83         | 582          | 352           | 1352        | 108         | 867           | 423            | 1953         |
| 20526        | Slc2a2      | 13         | 23           | 38            | 79          | 12          | 27            | 29             | 56           |
| 20527        | Slc2a3      | 96         | 351          | 715           | 871         | 93          | 347           | 673            | 676          |
| 20528        | Slc2a4      | 10         | 9            | 28            | 32          | 12          | 6             | 32             | 42           |
| 20529        | Slc31a1     | 18         | 98           | 97            | 295         | 26          | 219           | 148            | 390          |
| 20530        | Slc31a2     | 48         | 78           | 56            | 155         | 41          | 65            | 42             | 116          |
| 20531        | Slc34a2     | 5          | 22           | 29            | 20          | 5           | 31            | 25             | 22           |
| 20532        | Slc3a1      | 19         | 21           | 49            | 153         | 10          | 9             | 32             | 105          |
| 20533        | Slc4a1      | 12         | 26           | 31            | 67          | 13          | 22            | 29             | 133          |
| 20534        | Slc4a1ap    | 73         | 530          | 1037          | 1208        | 63          | 536           | 921            | 1088         |
| 20535        | Slc4a2      | 63         | 301          | 576           | 372         | 55          | 248           | 537            | 385          |
| 20536        | Slc4a3      | 15         | 12           | 33            | 37          | 16          | 15            | 30             | 47           |
| 20537        | Slc5a1      | 6          | 2            | 36            | 22          | 6           | 3             | 39             | 24           |
| 20538        | Slc6a2      | 8          | 4            | 25            | 32          | 9           | 3             | 29             | 23           |
| 20539        | Slc7a5      | 107        | 234          | 395           | 53          | 67          | 123           | 223            | 34           |
| 20540        | Slc7a7      | 10         | 24           | 22            | 84          | 19          | 336           | 63             | 280          |
| 20541        | Slc8a1      | 5          | 34           | 32            | 58          | 5           | 34            | 33             | 64           |
| 20544        | Slc9a1      | 81         | 233          | 635           | 141         | 78          | 177           | 519            | 140          |
| 20555        | Slfn1       | 422        | 277          | 1945          | 2415        | 13          | 9             | 39             | 147          |
| 20556        | Slfn2       | 547        | 2864         | 1617          | 5101        | 358         | 1829          | 1009           | 3701         |
| 20557        | Slfn3       | 39         | 3            | 18            | 61          | 28          | 4             | 18             | 34           |
| 20558        | Slfn4       | 5          | 2            | 23            | 35          | 4           | 3             | 18             | 28           |
| 20562        | Slit1       | 7          | 71           | 34            | 18          | 7           | 61            | 32             | 25           |
| 20563        | Slit2       | 5          | 25           | 28            | 27          | 5           | 14            | 31             | 28           |
| 20564        | Slit3       | 7          | 5            | 28            | 305         | 7           | 6             | 29             | 403          |
| 20568        | Slpi        | 22         | 97           | 111           | 520         | 22          | 115           | 109            | 508          |
| 20583        | Snai2       | 5          | 2            | 24            | 22          | 5           | 3             | 20             | 26           |
| 20586        | Smarca4     | 234        | 1927         | 228           | 1106        | 256         | 1818          | 214            | 1295         |
| 20587        | Smarcb1     | 118        | 1929         | 384           | 423         | 171         | 3035          | 519            | 706          |
| 20588        | Smarcc1     | 128        | 950          | 80            | 1373        | 137         | 932           | 76             | 1859         |
| 20589        | Ighmbp2     | 44         | 15           | 40            | 50          | 30          | 9             | 40             | 40           |
| 20591        | Jarid1c     | 188        | 751          | 120           | 341         | 181         | 947           | 122            | 480          |
| 20592        | Jarid1d     | 100        | 82           | 218           | 300         | 91          | 95            | 228            | 217          |
| 20595        | Smn1        | 29         | 61           | 734           | 3204        | 33          | 61            | 709            | 4068         |
| 20597        | Smpd1       | 55         | 778          | 70            | 616         | 69          | 985           | 70             | 852          |
| 20598        | Smpd2       | 47         | 72           | 270           | 505         | 37          | 69            | 229            | 426          |
| 20599        | Smr1        | 5          | 2            | 25            | 55          | 4           | 4             | 29             | 52           |
| 20600        | Smr2        | 4          | 2            | 27            | 35          | 4           | 4             | 19             | 53           |
| 20602        | Ncor2       | 156        | 1720         | 58            | 2617        | 149         | 1572          | 48             | 2990         |
| 20603        | Sms         | 108        | 919          | 453           | 412         | 155         | 1164          | 644            | 584          |
| 20604        | Sst         | 15         | 22           | 20            | 137         | 15          | 24            | 17             | 112          |
| 20605        | Sstr1       | 5          | 12           | 25            | 53          | 5           | 13            | 26             | 40           |

| NCBI Gene ID | Gene Symbol | Affy. CD4+ | Agilent CD4+ | Illumina CD4+ | Nimbl. CD4+ | Affy. CD19+ | Agilent CD19+ | Illumina CD19+ | Nimbl. CD19+ |
|--------------|-------------|------------|--------------|---------------|-------------|-------------|---------------|----------------|--------------|
| 20606        | Sstr2       | 7          | 16           | 26            | 108         | 7           | 11            | 27             | 132          |
| 20607        | Sstr3       | 10         | 12           | 25            | 58          | 8           | 12            | 25             | 102          |
| 20608        | Sstr4       | 11         | 90           | 27            | 22          | 12          | 93            | 28             | 22           |
| 20610        | Sumo3       | 55         | 470          | 744           | 16872       | 63          | 502           | 739            | 15769        |
| 20613        | Snai1       | 23         | 2            | 30            | 28          | 24          | 6             | 29             | 42           |
| 20614        | Snap25      | 6          | 8            | 40            | 34          | 6           | 10            | 38             | 40           |
| 20615        | Snapap      | 67         | 70           | 52            | 3553        | 79          | 82            | 53             | 3746         |
| 20616        | Snap91      | 9          | 3            | 28            | 26          | 10          | 3             | 25             | 26           |
| 20617        | Snca        | 6          | 43           | 41            | 42          | 7           | 38            | 40             | 56           |
| 20618        | Sncg        | 19         | 9            | 31            | 38          | 20          | 4             | 37             | 41           |
| 20619        | Snap23      | 52         | 189          | 114           | 1222        | 72          | 221           | 144            | 1628         |
| 20620        | Plk2        | 13         | 19           | 45            | 191         | 31          | 75            | 72             | 448          |
| 20621        | Snn         | 25         | 132          | 283           | 1345        | 184         | 4167          | 6044           | 11378        |
| 20623        | Snrk        | 228        | 968          | 56            | 2999        | 127         | 449           | 35             | 1627         |
| 20637        | Snrp70      | 278        | 9666         | 146           | 2630        | 231         | 6995          | 111            | 1779         |
| 20638        | Snrpb       | 183        | 728          | 2035          | 938         | 178         | 664           | 1762           | 984          |
| 20639        | Snrpb2      | 72         | 1634         | 35            | 6964        | 76          | 1612          | 42             | 6944         |
| 20641        | Snrpd1      | 101        | 302          | 513           | 5382        | 121         | 317           | 579            | 5916         |
| 20643        | Snrpe       | 188        | 535          | 31            | 4474        | 169         | 429           | 32             | 4506         |
| 20646        | Snurf       | 6          | 10           | 38            | 35          | 5           | 12            | 33             | 22           |
| 20648        | Snta1       | 12         | 16           | 33            | 77          | 11          | 11            | 30             | 54           |
| 20649        | Sntb1       | 145        | 35           | 36            | 492         | 20          | 36            | 28             | 26           |
| 20650        | Sntb2       | 26         | 55           | 113           | 219         | 14          | 26            | 58             | 71           |
| 20652        | Soat1       | 106        | 370          | 184           | 154         | 176         | 772           | 339            | 207          |
| 20655        | Sod1        | 454        | 6615         | 1334          | 18612       | 422         | 6555          | 1023           | 17256        |
| 20656        | Sod2        | 63         | 1536         | 604           | 3791        | 62          | 1419          | 626            | 3824         |
| 20657        | Sod3        | 8          | 3            | 30            | 131         | 8           | 3             | 32             | 147          |
| 20658        | Son         | 436        | 10141        | 94            | 7918        | 477         | 8782          | 114            | 7023         |
| 20660        | Sorl1       | 138        | 37           | 273           | 147         | 880         | 315           | 1583           | 747          |
| 20661        | Sort1       | 6          | 7            | 26            | 49          | 7           | 10            | 27             | 48           |
| 20662        | Sos1        | 72         | 36           | 38            | 65          | 62          | 24            | 39             | 49           |
| 20664        | Sox1        | 37         | 64           | 32            | 60          | 42          | 52            | 24             | 54           |
| 20666        | Sox11       | 6          | 13           | 28            | 99          | 6           | 9             | 20             | 75           |
| 20667        | Sox12       | 8          | 34           | 55            | 32          | 11          | 34            | 122            | 27           |
| 20668        | Sox13       | 26         | 2            | 24            | 47          | 22          | 3             | 25             | 28           |
| 20670        | Sox15       | 16         | 98           | 21            | 67          | 16          | 85            | 23             | 53           |
| 20671        | Sox17       | 6          | 14           | 16            | 24          | 7           | 9             | 15             | 22           |
| 20672        | Sox18       | 13         | 2            | 25            | 82          | 13          | 3             | 28             | 123          |
| 20674        | Sox2        | 5          | 2            | 41            | 65          | 5           | 3             | 40             | 102          |
| 20675        | Sox3        | 40         | 4            | 34            | 81          | 39          | 3             | 30             | 85           |
| 20677        | Sox4        | 56         | 85           | 179           | 7477        | 32          | 39            | 94             | 3678         |
| 20678        | Sox5        | 11         | 3            | 31            | 51          | 12          | 3             | 59             | 97           |
| 20679        | Sox6        | 9          | 2            | 112           | 35          | 9           | 4             | 163            | 35           |
| 20680        | Sox7        | 9          | 2            | 27            | 31          | 9           | 3             | 27             | 30           |
| 20681        | Sox8        | 9          | 5            | 29            | 38          | 9           | 4             | 29             | 44           |
| 20682        | Sox9        | 17         | 5            | 39            | 68          | 15          | 4             | 37             | 75           |
| 20683        | Sp1         | 126        | 711          | 95            | 3879        | 145         | 621           | 80             | 2827         |
| 20684        | Sp100       | 707        | 1035         | 1135          | 9343        | 641         | 715           | 1241           | 9552         |
| 20686        | Spa17       | 5          | 2            | 20            | 149         | 5           | 4             | 18             | 279          |
| 20687        | Sp3         | 191        | 1055         | 66            | 15768       | 153         | 680           | 68             | 11355        |
| 20688        | Sp4         | 114        | 105          | 91            | 2810        | 80          | 28            | 66             | 2103         |

| NCBI<br>Gene ID | Gene<br>Symbol | Affy.<br>CD4+ | Agilent<br>CD4+ | Illumina<br>CD4+ | Nimbl.<br>CD4+ | Affy.<br>CD19+ | Agilent<br>CD19+ | Illumina<br>CD19+ | Nimbl.<br>CD19+ |
|-----------------|----------------|---------------|-----------------|------------------|----------------|----------------|------------------|-------------------|-----------------|
| 20689           | Sall3          | 10            | 2               | 36               | 67             | 9              | 3                | 36                | 53              |
| 20690           | Spam1          | 4             | 4               | 19               | 24             | 4              | 6                | 17                | 23              |
| 20692           | Sparc          | 9             | 14              | 26               | 45             | 8              | 15               | 24                | 49              |
| 20698           | Sphk1          | 10            | 14              | 42               | 127            | 10             | 24               | 35                | 103             |
| 20701           | Serpina1b      | 5             | 2               | 26               | 74             | 4              | 3                | 28                | 77              |
| 20703           | Serpina1d      | 5             | 32              | 20               | 21             | 5              | 29               | 21                | 21              |
| 20704           | Serpina1e      | 11            | 7               | 23               | 21             | 10             | 8                | 19                | 39              |
| 20706           | Serpina9b      | 6             | 3               | 33               | 23             | 6              | 3                | 29                | 23              |
| 20707           | Serpina9c      | 5             | 4               | 22               | 16             | 5              | 3                | 25                | 19              |
| 20708           | Serpina6b      | 12            | 123             | 65               | 2361           | 13             | 87               | 44                | 1263            |
| 20710           | Serpina9e      | 5             | 23              | 22               | 46             | 5              | 24               | 23                | 29              |
| 20713           | Serpina1       | 13            | 38              | 61               | 132            | 25             | 138              | 109               | 363             |
| 20716           | Serpina3n      | 6             | 2               | 26               | 18             | 6              | 3                | 27                | 19              |
| 20717           | Serpina3m      | 6             | 84              | 24               | 30             | 7              | 96               | 26                | 31              |
| 20719           | Serpina6a      | 26            | 87              | 284              | 447            | 20             | 64               | 155               | 282             |
| 20720           | Serpina2       | 12            | 6               | 42               | 50             | 15             | 10               | 131               | 80              |
| 20723           | Serpina9       | 8             | 12              | 22               | 302            | 5              | 3                | 19                | 35              |
| 20724           | Serpina5       | 5             | 2               | 19               | 19             | 4              | 3                | 18                | 22              |
| 20725           | Serpina8       | 5             | 2               | 22               | 39             | 5              | 3                | 25                | 48              |
| 20726           | Serpina9d      | 4             | 6               | 24               | 15             | 4              | 9                | 29                | 25              |
| 20728           | Spica          | 5             | 6               | 22               | 27             | 6              | 90               | 28                | 83              |
| 20731           | Spina4         | 12            | 9               | 29               | 34             | 9              | 6                | 28                | 45              |
| 20732           | Spina1         | 11            | 9               | 76               | 76             | 11             | 19               | 71                | 114             |
| 20733           | Spina2         | 130           | 8               | 39               | 20461          | 59             | 9                | 34                | 10256           |
| 20737           | Spina          | 261           | 6393            | 283              | 8267           | 30             | 663              | 41                | 1222            |
| 20739           | Spina1         | 5             | 2               | 35               | 20             | 6              | 3                | 38                | 21              |
| 20740           | Spina2         | 303           | 2370            | 1666             | 13942          | 273            | 1870             | 1435              | 11937           |
| 20741           | Spina3         | 10            | 9               | 38               | 29             | 9              | 8                | 26                | 32              |
| 20742           | Spina2         | 508           | 3573            | 186              | 839            | 396            | 2398             | 147               | 361             |
| 20743           | Spina3         | 13            | 18              | 21               | 29             | 13             | 23               | 22                | 26              |
| 20744           | Strbp          | 83            | 183             | 32               | 2197           | 308            | 627              | 30                | 5964            |
| 20745           | Spock1         | 10            | 3               | 27               | 30             | 10             | 5                | 27                | 39              |
| 20747           | Spop           | 230           | 316             | 2556             | 6410           | 262            | 348              | 2668              | 6696            |
| 20750           | Spp1           | 7             | 5               | 22               | 97             | 6              | 13               | 22                | 100             |
| 20751           | Spr            | 56            | 323             | 146              | 1621           | 30             | 46               | 34                | 360             |
| 20753           | Sprra1a        | 10            | 28              | 25               | 29             | 10             | 37               | 27                | 81              |
| 20754           | Sprra1b        | 8             | 2               | 22               | 19             | 9              | 4                | 22                | 20              |
| 20755           | Sprra2a        | 29            | 37217           | 35               | 35             | 31             | 36179            | 35                | 72              |
| 20756           | Sprra2b        | 5             | 567             | 25               | 28             | 5              | 556              | 28                | 37              |
| 20758           | Sprra2d        | 7             | 6               | 23               | 26             | 7              | 10               | 26                | 31              |
| 20759           | Sprra2e        | 5             | 296             | 22               | 22             | 7              | 315              | 24                | 24              |
| 20760           | Sprra2f        | 4             | 5               | 24               | 19             | 5              | 6                | 23                | 18              |
| 20761           | Sprra2g        | 4             | 119             | 28               | 16             | 5              | 107              | 30                | 17              |
| 20762           | Sprra2h        | 6             | 2               | 33               | 21             | 6              | 3                | 32                | 17              |
| 20764           | Sprra2j        | 5             | 178             | 26               | 92             | 4              | 135              | 30                | 122             |
| 20765           | Sprra2k        | 5             | 346             | 21               | 16             | 5              | 370              | 28                | 21              |
| 20766           | Sprra3         | 6             | 8               | 22               | 20             | 6              | 6                | 19                | 26              |
| 20768           | Sephs2         | 50            | 249             | 74               | 288            | 57             | 309              | 74                | 284             |
| 20770           | Spt1           | 5             | 3               | 34               | 29             | 4              | 3                | 34                | 40              |
| 20771           | Spt2           | 4             | 9               | 51               | 32             | 5              | 8                | 48                | 30              |
| 20773           | Sptlc2         | 124           | 279             | 67               | 819            | 137            | 264              | 62                | 722             |

| NCBI<br>Gene ID | Gene<br>Symbol | Affy.<br>CD4+ | Agilent<br>CD4+ | Illumina<br>CD4+ | Nimbl.<br>CD4+ | Affy.<br>CD19+ | Agilent<br>CD19+ | Illumina<br>CD19+ | Nimbl.<br>CD19+ |
|-----------------|----------------|---------------|-----------------|------------------|----------------|----------------|------------------|-------------------|-----------------|
| 20775           | Sqle           | 40            | 237             | 300              | 2416           | 22             | 103              | 141               | 1318            |
| 20776           | Tmie           | 68            | 748             | 976              | 594            | 18             | 14               | 22                | 39              |
| 20778           | Scarb1         | 28            | 100             | 185              | 173            | 31             | 93               | 171               | 133             |
| 20779           | Src            | 11            | 22              | 49               | 41             | 10             | 8                | 48                | 52              |
| 20787           | Srebf1         | 111           | 2453            | 16               | 378            | 83             | 1574             | 17                | 266             |
| 20788           | Srebf2         | 299           | 1879            | 349              | 977            | 333            | 2364             | 505               | 1070            |
| 20807           | Srf            | 178           | 1142            | 1452             | 7358           | 155            | 1064             | 1130              | 5423            |
| 20810           | Srm            | 123           | 694             | 182              | 5160           | 109            | 642              | 133               | 4900            |
| 20811           | Srms           | 11            | 15              | 35               | 86             | 12             | 20               | 44                | 117             |
| 20813           | Srp14          | 111           | 3484            | 1241             | 26934          | 99             | 3161             | 1165              | 24654           |
| 20815           | Srpk1          | 556           | 989             | 2292             | 4437           | 186            | 333              | 783               | 1716            |
| 20817           | Srpk2          | 142           | 199             | 195              | 9694           | 88             | 91               | 118               | 5566            |
| 20818           | Srprb          | 50            | 81              | 121              | 522            | 42             | 95               | 90                | 310             |
| 20821           | Trim21         | 97            | 277             | 43               | 1954           | 76             | 206              | 41                | 1033            |
| 20823           | Ssb            | 353           | 59              | 1002             | 5450           | 346            | 60               | 1112              | 5796            |
| 20832           | Ssr4           | 104           | 1190            | 1763             | 5752           | 108            | 1317             | 2095              | 5860            |
| 20834           | Znrf4          | 14            | 18              | 25               | 94             | 14             | 11               | 27                | 73              |
| 20840           | Stac           | 9             | 17              | 18               | 20             | 8              | 7                | 21                | 29              |
| 20841           | Zfp143         | 89            | 250             | 321              | 1560           | 82             | 247              | 280               | 1276            |
| 20842           | Stag1          | 166           | 775             | 216              | 1408           | 145            | 594              | 155               | 946             |
| 20843           | Stag2          | 188           | 404             | 240              | 1201           | 170            | 393              | 248               | 1041            |
| 20844           | Stam           | 81            | 125             | 60               | 542            | 58             | 78               | 47                | 326             |
| 20845           | Star           | 20            | 44              | 72               | 1142           | 17             | 23               | 63                | 691             |
| 20846           | Stat1          | 494           | 2498            | 1337             | 11542          | 346            | 1405             | 1022              | 6132            |
| 20847           | Stat2          | 97            | 390             | 101              | 1610           | 169            | 609              | 147               | 2451            |
| 20848           | Stat3          | 334           | 1945            | 1445             | 5016           | 245            | 1312             | 1031              | 1535            |
| 20849           | Stat4          | 239           | 566             | 835              | 3942           | 160            | 399              | 578               | 2546            |
| 20850           | Stat5a         | 115           | 999             | 87               | 235            | 83             | 736              | 51                | 118             |
| 20851           | Stat5b         | 191           | 2000            | 27               | 1923           | 90             | 839              | 24                | 609             |
| 20852           | Stat6          | 343           | 1079            | 137              | 153            | 388            | 933              | 112               | 107             |
| 20853           | Stau1          | 138           | 96              | 427              | 1304           | 155            | 102              | 482               | 1278            |
| 20855           | Stc1           | 8             | 3               | 21               | 15             | 7              | 3                | 30                | 40              |
| 20856           | Stc2           | 14            | 2               | 36               | 94             | 12             | 3                | 37                | 50              |
| 20860           | Sult1e1        | 4             | 15              | 24               | 22             | 4              | 19               | 24                | 25              |
| 20861           | Stfa1          | 4             | 11              | 22               | 43             | 5              | 9                | 26                | 71              |
| 20863           | Stfa3          | 5             | 8               | 29               | 31             | 5              | 9                | 27                | 35              |
| 20866           | Stim1          | 229           | 1124            | 547              | 401            | 98             | 394              | 317               | 110             |
| 20867           | Stip1          | 229           | 822             | 727              | 2704           | 211            | 889              | 578               | 1932            |
| 20868           | Stk10          | 500           | 4990            | 2482             | 12935          | 366            | 3708             | 1675              | 9299            |
| 20869           | Stk11          | 194           | 638             | 625              | 5483           | 240            | 743              | 596               | 5375            |
| 20871           | Aurkc          | 10            | 81              | 28               | 74             | 10             | 212              | 64                | 110             |
| 20872           | Stk16          | 76            | 723             | 68               | 2073           | 74             | 586              | 58                | 1532            |
| 20873           | Plk4           | 15            | 10              | 69               | 1449           | 16             | 12               | 87                | 1720            |
| 20877           | Aurkb          | 16            | 4               | 28               | 67             | 25             | 42               | 89                | 186             |
| 20887           | Sult1a1        | 17            | 10              | 44               | 97             | 16             | 6                | 33                | 43              |
| 20888           | Sult1c1        | 5             | 33              | 18               | 35             | 4              | 37               | 20                | 51              |
| 20890           | Wnt8a          | 8             | 5               | 27               | 45             | 8              | 3                | 26                | 51              |
| 20892           | Stra13         | 39            | 295             | 68               | 1145           | 37             | 282              | 62                | 1265            |
| 20893           | Bhlhb2         | 12            | 11              | 39               | 17             | 44             | 177              | 519               | 169             |
| 20897           | Stra6          | 18            | 12              | 24               | 30             | 19             | 7                | 25                | 31              |
| 20899           | Stra8          | 5             | 2               | 25               | 35             | 5              | 4                | 24                | 30              |

| NCBI<br>Gene ID | Gene<br>Symbol | Affy.<br>CD4+ | Agilent<br>CD4+ | Illumina<br>CD4+ | Nimbl.<br>CD4+ | Affy.<br>CD19+ | Agilent<br>CD19+ | Illumina<br>CD19+ | Nimbl.<br>CD19+ |
|-----------------|----------------|---------------|-----------------|------------------|----------------|----------------|------------------|-------------------|-----------------|
| 20901           | Strap          | 100           | 1020            | 736              | 4468           | 113            | 1104             | 721               | 4835            |
| 20904           | Strm           | 19            | 3               | 30               | 26             | 9              | 3                | 31                | 23              |
| 20907           | Stx1a          | 26            | 66              | 401              | 288            | 17             | 18               | 112               | 155             |
| 20908           | Stx3           | 9             | 20              | 57               | 398            | 9              | 15               | 53                | 475             |
| 20909           | Stx4a          | 115           | 1704            | 405              | 6487           | 116            | 1793             | 313               | 5948            |
| 20910           | Stxbp1         | 14            | 3               | 36               | 35             | 15             | 10               | 59                | 45              |
| 20911           | Stxbp2         | 188           | 100             | 1707             | 1323           | 239            | 127              | 2196              | 1613            |
| 20913           | Stxbp4         | 9             | 5               | 46               | 144            | 10             | 5                | 44                | 110             |
| 20916           | Sucla2         | 85            | 811             | 33               | 10503          | 75             | 846              | 32                | 7178            |
| 20917           | Suclg2         | 66            | 136             | 57               | 3720           | 72             | 129              | 60                | 3216            |
| 20924           | Supt5h         | 192           | 3579            | 735              | 965            | 194            | 2750             | 556               | 816             |
| 20926           | Supt6h         | 176           | 1228            | 2020             | 334            | 163            | 1109             | 1622              | 314             |
| 20927           | Abcc8          | 8             | 4               | 44               | 26             | 8              | 7                | 42                | 26              |
| 20928           | Abcc9          | 7             | 3               | 33               | 80             | 7              | 3                | 34                | 166             |
| 20930           | Surf1          | 65            | 531             | 171              | 3609           | 64             | 570              | 157               | 3703            |
| 20931           | Surf2          | 85            | 397             | 229              | 4836           | 73             | 312              | 158               | 3592            |
| 20932           | Surf4          | 106           | 2118            | 903              | 3602           | 85             | 1481             | 643               | 2470            |
| 20935           | Surf6          | 50            | 183             | 194              | 809            | 48             | 388              | 158               | 845             |
| 20937           | Suv39h1        | 63            | 149             | 121              | 1092           | 56             | 124              | 92                | 694             |
| 20939           | Sva            | 4             | 11              | 26               | 29             | 4              | 12               | 28                | 39              |
| 20944           | Svs5           | 4             | 5               | 37               | 59             | 5              | 5                | 37                | 68              |
| 20945           | Svs6           | 5             | 2               | 17               | 49             | 4              | 3                | 21                | 60              |
| 20947           | Swap70         | 21            | 160             | 138              | 485            | 421            | 6888             | 5042              | 13728           |
| 20955           | Sybl1          | 31            | 148             | 36               | 9409           | 28             | 189              | 30                | 7921            |
| 20957           | Sycp1          | 4             | 3               | 19               | 19             | 5              | 3                | 20                | 26              |
| 20962           | Sycp3          | 4             | 2               | 25               | 38             | 4              | 3                | 26                | 90              |
| 20963           | Syk            | 11            | 8               | 17               | 25             | 560            | 3392             | 343               | 7342            |
| 20964           | Syn1           | 9             | 1567            | 29               | 54             | 8              | 1508             | 29                | 50              |
| 20965           | Syn2           | 10            | 20              | 29               | 38             | 10             | 30               | 29                | 30              |
| 20969           | Sdc1           | 9             | 5               | 25               | 19             | 12             | 75               | 34                | 427             |
| 20970           | Sdc3           | 17            | 134             | 81               | 188            | 16             | 148              | 69                | 225             |
| 20971           | Sdc4           | 18            | 27              | 36               | 306            | 149            | 1571             | 661               | 8616            |
| 20972           | Syng1          | 20            | 42              | 27               | 91             | 20             | 18               | 28                | 71              |
| 20973           | Syng2          | 135           | 120             | 215              | 627            | 313            | 374              | 556               | 1556            |
| 20974           | Syng3          | 19            | 64              | 23               | 26             | 22             | 61               | 24                | 26              |
| 20975           | Synj2          | 40            | 130             | 45               | 252            | 16             | 28               | 27                | 79              |
| 20977           | Syp            | 13            | 6               | 56               | 56             | 11             | 3                | 42                | 52              |
| 20979           | Syt1           | 6             | 11              | 28               | 22             | 7              | 12               | 29                | 18              |
| 20980           | Syt2           | 8             | 3               | 20               | 59             | 7              | 3                | 19                | 47              |
| 20981           | Syt3           | 9             | 12              | 32               | 49             | 9              | 13               | 31                | 52              |
| 20983           | Syt4           | 9             | 2               | 58               | 26             | 11             | 3                | 57                | 20              |
| 20997           | T              | 7             | 13              | 32               | 22             | 7              | 12               | 28                | 24              |
| 21331           | T2             | 11            | 3               | 20               | 52             | 11             | 6                | 21                | 63              |
| 21333           | Tac1           | 4             | 4               | 34               | 19             | 4              | 4                | 34                | 23              |
| 21334           | Tac2           | 5             | 67              | 32               | 118            | 5              | 75               | 29                | 132             |
| 21335           | Tacc3          | 14            | 25              | 49               | 559            | 19             | 82               | 65                | 1079            |
| 21336           | Tacr1          | 9             | 44              | 25               | 29             | 10             | 41               | 25                | 38              |
| 21337           | Tacr2          | 10            | 2               | 22               | 44             | 10             | 3                | 21                | 52              |
| 21338           | Tacr3          | 4             | 3               | 26               | 24             | 4              | 3                | 30                | 30              |
| 21339           | Taf1a          | 99            | 172             | 344              | 3750           | 101            | 180              | 363               | 3630            |
| 21340           | Taf1b          | 133           | 55              | 27               | 1445           | 128            | 65               | 22                | 973             |

| NCBI<br>Gene ID | Gene<br>Symbol | Affy.<br>CD4+ | Agilent<br>CD4+ | Illumina<br>CD4+ | Nimbl.<br>CD4+ | Affy.<br>CD19+ | Agilent<br>CD19+ | Illumina<br>CD19+ | Nimbl.<br>CD19+ |
|-----------------|----------------|---------------|-----------------|------------------|----------------|----------------|------------------|-------------------|-----------------|
| 21341           | Taf1c          | 67            | 464             | 1124             | 291            | 58             | 355              | 767               | 213             |
| 21343           | Taf6           | 68            | 25              | 280              | 150            | 88             | 34               | 282               | 124             |
| 21345           | Tagln          | 14            | 352             | 34               | 74             | 12             | 268              | 30                | 38              |
| 21346           | Tagln2         | 129           | 3049            | 1111             | 3141           | 80             | 1524             | 638               | 1560            |
| 21349           | Tal1           | 23            | 5               | 31               | 71             | 19             | 3                | 34                | 78              |
| 21350           | Tal2           | 5             | 2               | 30               | 30             | 5              | 8                | 29                | 27              |
| 21351           | Taldo1         | 63            | 6176            | 2164             | 16839          | 78             | 7426             | 2654              | 20029           |
| 21353           | Tank           | 67            | 587             | 406              | 6288           | 107            | 856              | 568               | 9685            |
| 21354           | Tap1           | 232           | 335             | 319              | 3701           | 226            | 295              | 251               | 3511            |
| 21355           | Tap2           | 156           | 241             | 1067             | 5009           | 130            | 171              | 707               | 4022            |
| 21356           | Tapbp          | 383           | 5697            | 76               | 11355          | 427            | 6561             | 72                | 11981           |
| 21357           | Tarbp2         | 47            | 341             | 674              | 945            | 46             | 337              | 569               | 870             |
| 21366           | Slc6a6         | 119           | 734             | 1452             | 2328           | 114            | 472              | 1275              | 1623            |
| 21367           | Cntn2          | 13            | 12              | 29               | 24             | 13             | 14               | 28                | 31              |
| 21371           | Tbca           | 243           | 2888            | 3048             | 5243           | 170            | 2099             | 2234              | 4493            |
| 21372           | Tbl1x          | 290           | 117             | 392              | 625            | 160            | 66               | 195               | 305             |
| 21374           | Tbp            | 61            | 57              | 269              | 751            | 75             | 54               | 338               | 641             |
| 21375           | Tbr1           | 7             | 3               | 42               | 42             | 6              | 5                | 38                | 57              |
| 21376           | Tbrg1          | 203           | 1296            | 337              | 5913           | 154            | 907              | 216               | 3282            |
| 21378           | Tbrg3          | 224           | 96              | 40               | 2497           | 144            | 62               | 35                | 1011            |
| 21379           | Tbrg4          | 113           | 394             | 888              | 1024           | 122            | 395              | 889               | 1199            |
| 21380           | Tbx1           | 13            | 2               | 25               | 25             | 12             | 2                | 26                | 24              |
| 21384           | Tbx15          | 5             | 15              | 43               | 56             | 6              | 20               | 40                | 57              |
| 21385           | Tbx2           | 15            | 96              | 25               | 93             | 13             | 102              | 26                | 80              |
| 21386           | Tbx3           | 9             | 5               | 36               | 44             | 8              | 4                | 35                | 56              |
| 21387           | Tbx4           | 9             | 3               | 33               | 87             | 8              | 5                | 34                | 97              |
| 21388           | Tbx5           | 5             | 8               | 30               | 57             | 5              | 9                | 31                | 46              |
| 21389           | Tbx6           | 41            | 550             | 498              | 53             | 34             | 306              | 334               | 45              |
| 21390           | Tbxa2r         | 82            | 752             | 492              | 282            | 28             | 185              | 107               | 121             |
| 21391           | Tbxas1         | 7             | 9               | 27               | 51             | 7              | 6                | 27                | 22              |
| 21393           | Tcap           | 11            | 43              | 66               | 4104           | 12             | 39               | 59                | 2098            |
| 21399           | Tcea1          | 278           | 252             | 22               | 3565           | 314            | 344              | 19                | 4379            |
| 21400           | Tcea2          | 25            | 11              | 329              | 638            | 27             | 18               | 432               | 699             |
| 21401           | Tcea3          | 11            | 7               | 36               | 41             | 10             | 7                | 157               | 88              |
| 21402           | Skp1a          | 120           | 1188            | 208              | 16175          | 55             | 586              | 120               | 8515            |
| 21405           | Tcf1           | 11            | 11              | 32               | 437            | 11             | 9                | 26                | 565             |
| 21406           | Tcf12          | 210           | 706             | 159              | 2623           | 202            | 540              | 123               | 1637            |
| 21407           | Tcf15          | 8             | 2               | 25               | 124            | 7              | 4                | 27                | 119             |
| 21410           | Tcf2           | 5             | 69              | 31               | 87             | 7              | 68               | 32                | 109             |
| 21411           | Tcf20          | 358           | 112             | 37               | 81             | 229            | 90               | 28                | 54              |
| 21412           | Tcf21          | 6             | 3               | 18               | 30             | 7              | 3                | 24                | 32              |
| 21413           | Tcf4           | 14            | 27              | 86               | 436            | 146            | 1212             | 2453              | 13034           |
| 21414           | Tcf7           | 1377          | 5351            | 1821             | 1620           | 16             | 131              | 29                | 44              |
| 21415           | Tcf3           | 9             | 29              | 38               | 134            | 9              | 3                | 38                | 78              |
| 21416           | Tcf7l2         | 9             | 22              | 35               | 882            | 7              | 18               | 41                | 1083            |
| 21418           | Tcfap2a        | 6             | 48              | 34               | 51             | 6              | 46               | 33                | 45              |
| 21419           | Tcfap2b        | 7             | 22              | 44               | 41             | 6              | 18               | 46                | 30              |
| 21420           | Tcfap2c        | 5             | 13              | 37               | 94             | 6              | 10               | 33                | 70              |
| 21422           | Tcfcp2         | 26            | 6               | 84               | 202            | 26             | 8                | 64                | 190             |
| 21423           | Tcfe2a         | 114           | 931             | 337              | 258            | 247            | 2708             | 638               | 450             |
| 21425           | Tcfef          | 31            | 15              | 21               | 49             | 101            | 46               | 36                | 97              |

| NCBI<br>Gene ID | Gene<br>Symbol | Affy.<br>CD4+ | Agilent<br>CD4+ | Illumina<br>CD4+ | Nimbl.<br>CD4+ | Affy.<br>CD19+ | Agilent<br>CD19+ | Illumina<br>CD19+ | Nimbl.<br>CD19+ |
|-----------------|----------------|---------------|-----------------|------------------|----------------|----------------|------------------|-------------------|-----------------|
| 21426           | Tcfec          | 4             | 31              | 24               | 40             | 4              | 27               | 20                | 34              |
| 21429           | Ubtf           | 213           | 2033            | 355              | 959            | 205            | 2787             | 401               | 1044            |
| 21432           | Tcl1           | 4             | 33              | 37               | 30             | 5              | 40               | 34                | 35              |
| 21452           | Tcn2           | 42            | 50              | 82               | 244            | 59             | 64               | 111               | 319             |
| 21453           | Tcof1          | 190           | 1154            | 1338             | 5909           | 178            | 996              | 1036              | 4559            |
| 21454           | Tcp1           | 309           | 1129            | 1356             | 2874           | 333            | 1082             | 1488              | 2719            |
| 21463           | Tcp11          | 13            | 11              | 39               | 162            | 11             | 11               | 38                | 93              |
| 21580           | Tcrb-v13       | 127           | 39996           | 17062            | 3436           | 9              | 1098             | 61                | 39              |
| 21645           | Tcte1          | 9             | 3               | 35               | 38             | 10             | 4                | 28                | 35              |
| 21646           | Tcte2          | 6             | 6               | 28               | 37             | 6              | 5                | 25                | 31              |
| 21647           | Tcte3          | 11            | 3               | 37               | 75             | 9              | 4                | 36                | 81              |
| 21652           | Phf1           | 225           | 805             | 47               | 613            | 183            | 523              | 42                | 532             |
| 21664           | Phlda1         | 35            | 200             | 237              | 67             | 22             | 84               | 133               | 47              |
| 21665           | Tdg            | 94            | 98              | 62               | 557            | 95             | 95               | 60                | 567             |
| 21667           | Tdgf1          | 12            | 22              | 24               | 110            | 14             | 19               | 24                | 42              |
| 21672           | Prdx2          | 115           | 2122            | 1331             | 13113          | 121            | 2354             | 1384              | 12250           |
| 21673           | Dntt           | 7             | 385             | 34               | 823            | 5              | 66               | 22                | 63              |
| 21674           | Sry            | 29            | 2               | 21               | 21             | 25             | 4                | 23                | 33              |
| 21676           | Tead1          | 9             | 3               | 23               | 28             | 8              | 3                | 23                | 27              |
| 21677           | Tead2          | 17            | 27              | 32               | 49             | 19             | 30               | 37                | 84              |
| 21678           | Tead3          | 11            | 8               | 26               | 60             | 13             | 9                | 24                | 76              |
| 21679           | Tead4          | 12            | 2               | 29               | 42             | 12             | 3                | 31                | 39              |
| 21681           | Thoc4          | 180           | 3511            | 1055             | 648            | 203            | 5363             | 1062              | 630             |
| 21682           | Tec            | 23            | 144             | 174              | 273            | 263            | 701              | 612               | 1201            |
| 21683           | Tecta          | 8             | 8               | 28               | 66             | 7              | 5                | 26                | 80              |
| 21684           | Tectb          | 6             | 3               | 20               | 25             | 5              | 3                | 24                | 37              |
| 21685           | Tef            | 33            | 93              | 472              | 111            | 34             | 120              | 566               | 200             |
| 21687           | Tek            | 5             | 24              | 22               | 16             | 5              | 22               | 20                | 23              |
| 21689           | Tekt1          | 6             | 5               | 29               | 77             | 6              | 5                | 27                | 41              |
| 21745           | Tep1           | 58            | 406             | 46               | 540            | 76             | 633              | 65                | 844             |
| 21749           | Terf1          | 112           | 341             | 24               | 2850           | 99             | 314              | 22                | 2219            |
| 21750           | Terf2          | 81            | 230             | 249              | 3509           | 96             | 207              | 231               | 3689            |
| 21752           | Tert           | 12            | 58              | 28               | 45             | 12             | 74               | 24                | 48              |
| 21753           | Tes            | 241           | 220             | 3080             | 19461          | 89             | 47               | 1151              | 9420            |
| 21754           | Tesk1          | 137           | 1156            | 654              | 262            | 145            | 1042             | 231               | 423             |
| 21755           | Tesp1          | 6             | 5               | 34               | 36             | 6              | 2                | 32                | 40              |
| 21756           | Tesp2          | 8             | 3               | 35               | 31             | 8              | 3                | 36                | 28              |
| 21761           | Morf4l1        | 801           | 10272           | 56               | 23052          | 882            | 11469            | 55                | 21588           |
| 21762           | Psm2           | 240           | 1334            | 490              | 5322           | 247            | 1454             | 458               | 3976            |
| 21763           | Tex2           | 78            | 586             | 120              | 6483           | 24             | 120              | 49                | 1576            |
| 21766           | Tex261         | 92            | 148             | 768              | 6052           | 73             | 126              | 548               | 4411            |
| 21767           | Tex264         | 79            | 1370            | 64               | 1863           | 52             | 810              | 45                | 1030            |
| 21770           | Ppp2r5d        | 69            | 1130            | 436              | 393            | 53             | 889              | 294               | 283             |
| 21778           | Tex9           | 18            | 48              | 22               | 836            | 20             | 63               | 22                | 999             |
| 21780           | Tfam           | 54            | 1995            | 470              | 2276           | 76             | 2751             | 607               | 2405            |
| 21781           | Tfdp1          | 156           | 250             | 119              | 14197          | 124            | 198              | 89                | 8960            |
| 21784           | Tff1           | 11            | 27              | 18               | 28             | 10             | 35               | 21                | 30              |
| 21785           | Tff2           | 9             | 7               | 24               | 65             | 9              | 4                | 26                | 53              |
| 21786           | Tff3           | 14            | 5               | 24               | 34             | 12             | 7                | 23                | 35              |
| 21788           | Tfpi           | 18            | 12              | 78               | 2525           | 13             | 6                | 44                | 748             |
| 21789           | Tfpi2          | 8             | 2               | 18               | 20             | 9              | 3                | 21                | 19              |

| NCBI<br>Gene ID | Gene<br>Symbol | Affy.<br>CD4+ | Agilent<br>CD4+ | Illumina<br>CD4+ | Nimbl.<br>CD4+ | Affy.<br>CD19+ | Agilent<br>CD19+ | Illumina<br>CD19+ | Nimbl.<br>CD19+ |
|-----------------|----------------|---------------|-----------------|------------------|----------------|----------------|------------------|-------------------|-----------------|
| 21802           | Tgfa           | 48            | 10              | 29               | 30             | 54             | 7                | 30                | 26              |
| 21803           | Tgfb1          | 351           | 295             | 222              | 224            | 596            | 468              | 340               | 320             |
| 21804           | Tgfb1i1        | 27            | 74              | 47               | 77             | 21             | 27               | 35                | 105             |
| 21808           | Tgfb2          | 7             | 2               | 33               | 74             | 6              | 3                | 32                | 60              |
| 21809           | Tgfb3          | 8             | 24              | 36               | 148            | 10             | 51               | 40                | 195             |
| 21810           | Tgfb1          | 12            | 7               | 31               | 65             | 12             | 16               | 30                | 154             |
| 21812           | Tgfbr1         | 71            | 227             | 864              | 637            | 67             | 135              | 778               | 541             |
| 21813           | Tgfbr2         | 494           | 3460            | 3172             | 3698           | 386            | 2273             | 2622              | 2528            |
| 21814           | Tgfbr3         | 157           | 10              | 1231             | 6881           | 13             | 10               | 29                | 41              |
| 21816           | Tgm1           | 10            | 5               | 31               | 76             | 13             | 8                | 33                | 46              |
| 21817           | Tgm2           | 13            | 8               | 21               | 37             | 14             | 20               | 34                | 69              |
| 21818           | Tgm3           | 15            | 37              | 23               | 36             | 15             | 22               | 25                | 44              |
| 21822           | Tgtp           | 238           | 2602            | 137              | 11311          | 35             | 313              | 38                | 1182            |
| 21823           | Th             | 10            | 7               | 29               | 51             | 11             | 4                | 28                | 53              |
| 21824           | Thbd           | 7             | 2               | 28               | 27             | 8              | 10               | 37                | 61              |
| 21825           | Thbs1          | 8             | 8               | 44               | 37             | 7              | 6                | 44                | 42              |
| 21826           | Thbs2          | 7             | 5               | 25               | 21             | 6              | 9                | 23                | 25              |
| 21827           | Thbs3          | 9             | 40              | 36               | 208            | 8              | 35               | 34                | 130             |
| 21828           | Thbs4          | 8             | 6               | 24               | 32             | 8              | 6                | 20                | 43              |
| 21830           | Theg           | 7             | 21              | 33               | 68             | 6              | 12               | 32                | 105             |
| 21832           | Thpo           | 7             | 110             | 18               | 22             | 6              | 138              | 18                | 22              |
| 21833           | Thra           | 40            | 403             | 75               | 1359           | 14             | 81               | 35                | 251             |
| 21834           | Thrb           | 6             | 35              | 20               | 328            | 5              | 36               | 20                | 37              |
| 21835           | Thrsp          | 7             | 3               | 26               | 91             | 6              | 5                | 23                | 78              |
| 21838           | Thy1           | 650           | 15242           | 7369             | 4440           | 17             | 473              | 27                | 70              |
| 21841           | Tia1           | 72            | 484             | 226              | 2528           | 87             | 619              | 295               | 2925            |
| 21843           | Tial1          | 156           | 594             | 382              | 2500           | 158            | 718              | 316               | 2392            |
| 21844           | Tiam1          | 17            | 71              | 258              | 497            | 8              | 19               | 33                | 91              |
| 21846           | Tie1           | 7             | 2               | 20               | 28             | 7              | 3                | 19                | 50              |
| 21848           | Trim24         | 65            | 582             | 33               | 1727           | 80             | 614              | 35                | 2119            |
| 21849           | Trim28         | 278           | 1107            | 1710             | 1381           | 280            | 862              | 1571              | 1173            |
| 21853           | Timeless       | 36            | 207             | 29               | 5142           | 29             | 98               | 26                | 3073            |
| 21854           | Timm17a        | 161           | 430             | 926              | 5942           | 129            | 367              | 805               | 4887            |
| 21855           | Timm17b        | 64            | 1474            | 76               | 1183           | 80             | 2486             | 94                | 1350            |
| 21856           | Timm44         | 70            | 1228            | 298              | 989            | 70             | 1256             | 280               | 1056            |
| 21857           | Timp1          | 9             | 92              | 51               | 80             | 8              | 73               | 48                | 62              |
| 21858           | Timp2          | 66            | 311             | 386              | 4222           | 10             | 21               | 36                | 163             |
| 21859           | Timp3          | 6             | 3               | 44               | 43             | 6              | 3                | 39                | 43              |
| 21869           | Titf1          | 8             | 3               | 45               | 48             | 8              | 3                | 48                | 47              |
| 21871           | Atp6v0a2       | 190           | 403             | 551              | 2288           | 124            | 205              | 294               | 1259            |
| 21872           | Tjp1           | 7             | 4               | 30               | 19             | 6              | 5                | 27                | 29              |
| 21873           | Tjp2           | 21            | 60              | 57               | 65             | 21             | 45               | 86                | 98              |
| 21877           | Tk1            | 22            | 54              | 33               | 1272           | 60             | 545              | 182               | 2825            |
| 21881           | Tkt            | 97            | 1804            | 2155             | 1362           | 132            | 1943             | 2447              | 1671            |
| 21884           | Fabp9          | 4             | 3               | 28               | 26             | 4              | 3                | 26                | 27              |
| 21885           | Tle1           | 17            | 95              | 134              | 380            | 14             | 67               | 111               | 378             |
| 21886           | Tle2           | 13            | 33              | 34               | 91             | 13             | 36               | 38                | 200             |
| 21887           | Tle3           | 193           | 311             | 103              | 11720          | 155            | 228              | 77                | 10336           |
| 21888           | Tle4           | 187           | 1973            | 1586             | 2128           | 132            | 1418             | 1247              | 1128            |
| 21892           | Tll1           | 6             | 2               | 33               | 38             | 6              | 3                | 31                | 35              |
| 21894           | Tln1           | 498           | 2058            | 537              | 1065           | 385            | 1285             | 350               | 710             |



| NCBI Gene ID | Gene Symbol | Affy. CD4+ | Agilent CD4+ | Illumina CD4+ | Nimbl. CD4+ | Affy. CD19+ | Agilent CD19+ | Illumina CD19+ | Nimbl. CD19+ |
|--------------|-------------|------------|--------------|---------------|-------------|-------------|---------------|----------------|--------------|
| 21897        | Tlr1        | 79         | 325          | 170           | 7716        | 309         | 1270          | 543            | 14586        |
| 21898        | Tlr4        | 6          | 3            | 40            | 20          | 19          | 47            | 115            | 1675         |
| 21899        | Tlr6        | 15         | 28           | 80            | 489         | 22          | 80            | 142            | 1146         |
| 21906        | Otop1       | 15         | 30           | 18            | 26          | 16          | 24            | 22             | 27           |
| 21907        | Nr2e1       | 6          | 3            | 46            | 22          | 6           | 3             | 46             | 28           |
| 21908        | Tlx1        | 10         | 4            | 20            | 39          | 9           | 7             | 23             | 45           |
| 21909        | Tlx2        | 13         | 81           | 33            | 88          | 14          | 93            | 31             | 95           |
| 21915        | Dtymk       | 61         | 431          | 766           | 11501       | 64          | 456           | 881            | 10900        |
| 21916        | Tmod1       | 7          | 4            | 29            | 52          | 8           | 3             | 29             | 66           |
| 21917        | Tmpo        | 155        | 680          | 123           | 5255        | 148         | 652           | 105            | 4509         |
| 21923        | Tnc         | 8          | 3            | 33            | 16          | 8           | 6             | 32             | 22           |
| 21924        | Tnnc1       | 11         | 12           | 28            | 64          | 11          | 4             | 26             | 57           |
| 21925        | Tnnc2       | 12         | 50           | 40            | 161         | 11          | 31            | 34             | 132          |
| 21926        | Tnf         | 98         | 150          | 144           | 2557        | 86          | 107           | 91             | 2353         |
| 21927        | Tnfaip1     | 29         | 29           | 463           | 408         | 24          | 29            | 538            | 425          |
| 21928        | Tnfaip2     | 7          | 12           | 24            | 24          | 8           | 16            | 27             | 29           |
| 21929        | Tnfaip3     | 402        | 711          | 603           | 152         | 143         | 481           | 419            | 89           |
| 21930        | Tnfaip6     | 5          | 2            | 21            | 52          | 5           | 2             | 24             | 58           |
| 21933        | Tnfrsf10b   | 11         | 13           | 53            | 44          | 7           | 15            | 46             | 23           |
| 21934        | Tnfrsf11a   | 9          | 14           | 39            | 95          | 10          | 6             | 39             | 42           |
| 21935        | Tnfrsf17    | 9          | 3            | 20            | 29          | 7           | 13            | 33             | 34           |
| 21936        | Tnfrsf18    | 101        | 2187         | 386           | 11543       | 33          | 909           | 130            | 5195         |
| 21937        | Tnfrsf1a    | 68         | 725          | 753           | 198         | 11          | 14            | 33             | 62           |
| 21941        | Tnfrsf8     | 14         | 9            | 28            | 39          | 14          | 11            | 31             | 32           |
| 21942        | Tnfrsf9     | 32         | 76           | 58            | 801         | 15          | 12            | 22             | 347          |
| 21943        | Tnfsf11     | 51         | 17           | 89            | 78          | 40          | 3             | 30             | 20           |
| 21945        | Dedd        | 93         | 98           | 59            | 767         | 110         | 135           | 52             | 569          |
| 21946        | Pglyrp1     | 60         | 80           | 179           | 264         | 128         | 226           | 406            | 571          |
| 21949        | Tnfsf8      | 54         | 131          | 96            | 136         | 7           | 12            | 20             | 34           |
| 21950        | Tnfsf9      | 6          | 4            | 23            | 114         | 6           | 3             | 24             | 70           |
| 21951        | Tnks        | 114        | 114          | 32            | 231         | 104         | 74            | 40             | 117          |
| 21952        | Tnni1       | 8          | 8            | 40            | 142         | 10          | 9             | 43             | 106          |
| 21953        | Tnni2       | 16         | 17           | 24            | 136         | 20          | 266           | 128            | 791          |
| 21954        | Tnni3       | 13         | 11           | 59            | 135         | 15          | 8             | 60             | 221          |
| 21955        | Tnnt1       | 11         | 97           | 94            | 354         | 8           | 16            | 34             | 109          |
| 21956        | Tnnt2       | 15         | 11           | 39            | 185         | 15          | 3             | 29             | 85           |
| 21957        | Tnnt3       | 34         | 14           | 67            | 293         | 34          | 18            | 65             | 269          |
| 21958        | Tnp1        | 7          | 43           | 20            | 58          | 7           | 33            | 22             | 121          |
| 21959        | Tnp2        | 8          | 39           | 39            | 29          | 7           | 28            | 39             | 36           |
| 21960        | Tnr         | 6          | 2            | 32            | 41          | 6           | 3             | 31             | 46           |
| 21968        | Tom1        | 43         | 181          | 33            | 323         | 40          | 244           | 32             | 305          |
| 21969        | Top1        | 119        | 571          | 117           | 1835        | 119         | 501           | 102            | 1315         |
| 21973        | Top2a       | 17         | 27           | 48            | 1217        | 39          | 46            | 86             | 2567         |
| 21974        | Top2b       | 244        | 6165         | 858           | 5751        | 180         | 4522          | 711            | 3427         |
| 21975        | Top3a       | 49         | 30           | 67            | 86          | 47          | 73            | 63             | 113          |
| 21976        | Top3b       | 75         | 910          | 140           | 316         | 104         | 1541          | 180            | 314          |
| 21981        | Ppp1r13b    | 112        | 440          | 541           | 1483        | 69          | 259           | 288            | 1183         |
| 21983        | Tpbg        | 6          | 7            | 23            | 44          | 5           | 4             | 24             | 49           |
| 21984        | Tpbpa       | 4          | 3            | 22            | 37          | 4           | 6             | 25             | 36           |
| 21985        | Tpd52       | 28         | 374          | 37            | 1625        | 67          | 1216          | 42             | 3755         |
| 21987        | Tpd52l1     | 14         | 6            | 40            | 19          | 13          | 6             | 38             | 23           |

| NCBI Gene ID | Gene Symbol | Affy. CD4+ | Agilent CD4+ | Illumina CD4+ | Nimbl. CD4+ | Affy. CD19+ | Agilent CD19+ | Illumina CD19+ | Nimbl. CD19+ |
|--------------|-------------|------------|--------------|---------------|-------------|-------------|---------------|----------------|--------------|
| 21990        | Tph1        | 5          | 16           | 23            | 36          | 5           | 3             | 21             | 24           |
| 21991        | Tpi1        | 48         | 427          | 475           | 2502        | 91          | 827           | 960            | 4859         |
| 22003        | Tpm1        | 46         | 302          | 194           | 4819        | 50          | 305           | 179            | 4453         |
| 22004        | Tpm2        | 8          | 15           | 29            | 70          | 7           | 8             | 28             | 88           |
| 22017        | Tpmt        | 8          | 17           | 55            | 144         | 7           | 19            | 55             | 88           |
| 22018        | Tpo         | 10         | 4            | 23            | 37          | 10          | 5             | 26             | 36           |
| 22019        | Tpp2        | 289        | 666          | 462           | 8358        | 214         | 477           | 378            | 5517         |
| 22021        | Tpst1       | 27         | 120          | 108           | 529         | 96          | 1053          | 792            | 2537         |
| 22022        | Tpst2       | 163        | 2666         | 1300          | 400         | 114         | 1604          | 766            | 258          |
| 22024        | Crisp2      | 4          | 3            | 20            | 19          | 4           | 3             | 16             | 28           |
| 22025        | Nr2c1       | 34         | 54           | 72            | 151         | 28          | 33            | 44             | 92           |
| 22026        | Nr2c2       | 296        | 449          | 28            | 1435        | 213         | 213           | 24             | 799          |
| 22029        | Traf1       | 131        | 1426         | 515           | 1519        | 48          | 547           | 231            | 707          |
| 22030        | Traf2       | 104        | 1010         | 104           | 3292        | 137         | 1357          | 132            | 3518         |
| 22031        | Traf3       | 116        | 612          | 710           | 2206        | 167         | 817           | 941            | 2967         |
| 22032        | Traf4       | 96         | 541          | 124           | 104         | 98          | 542           | 91             | 63           |
| 22033        | Traf5       | 136        | 1175         | 196           | 3742        | 210         | 2015          | 289            | 5702         |
| 22034        | Traf6       | 94         | 119          | 381           | 410         | 85          | 57            | 321            | 198          |
| 22035        | Tnfsf10     | 24         | 12           | 33            | 1757        | 9           | 3             | 25             | 285          |
| 22036        | Traip       | 14         | 35           | 27            | 44          | 14          | 80            | 34             | 88           |
| 22037        | Trap1a      | 5          | 3            | 25            | 24          | 5           | 4             | 23             | 20           |
| 22038        | Plscr1      | 18         | 28           | 38            | 182         | 30          | 183           | 79             | 905          |
| 22040        | Trex1       | 43         | 140          | 216           | 737         | 41          | 282           | 454            | 1885         |
| 22041        | Trf         | 9          | 25           | 23            | 35          | 9           | 22            | 26             | 204          |
| 22042        | Tfrc        | 74         | 103          | 400           | 795         | 106         | 124           | 590            | 1156         |
| 22044        | Trh         | 8          | 2            | 32            | 19          | 9           | 3             | 35             | 20           |
| 22045        | Trhr        | 4          | 2            | 29            | 20          | 4           | 3             | 29             | 24           |
| 22051        | Trip6       | 23         | 336          | 26            | 440         | 21          | 217           | 27             | 357          |
| 22057        | Tob1        | 111        | 79           | 132           | 742         | 71          | 32            | 68             | 307          |
| 22059        | Trp53       | 116        | 585          | 1183          | 2714        | 108         | 810           | 900            | 2238         |
| 22061        | Trp63       | 9          | 4            | 26            | 59          | 9           | 4             | 29             | 57           |
| 22062        | Trp73       | 12         | 70           | 29            | 130         | 12          | 120           | 26             | 105          |
| 22063        | Trpc1       | 5          | 52           | 37            | 18          | 5           | 47            | 34             | 19           |
| 22064        | Trpc2       | 47         | 252          | 130           | 2075        | 44          | 244           | 114            | 1858         |
| 22065        | Trpc3       | 4          | 2            | 24            | 35          | 5           | 3             | 21             | 48           |
| 22066        | Trpc4       | 6          | 7            | 19            | 72          | 6           | 4             | 19             | 71           |
| 22067        | Trpc5       | 5          | 5            | 35            | 36          | 6           | 4             | 33             | 31           |
| 22068        | Trpc6       | 5          | 2            | 22            | 45          | 7           | 3             | 18             | 58           |
| 22072        | Prss2       | 5          | 12           | 21            | 43          | 5           | 10            | 22             | 33           |
| 22084        | Tsc2        | 83         | 680          | 406           | 1038        | 96          | 1867          | 462            | 965          |
| 22088        | Tsg101      | 92         | 337          | 337           | 544         | 95          | 241           | 320            | 402          |
| 22094        | Tshb        | 4          | 3            | 23            | 23          | 4           | 4             | 23             | 68           |
| 22095        | Tshr        | 4          | 3            | 32            | 22          | 5           | 3             | 32             | 24           |
| 22099        | Tsn         | 126        | 2386         | 389           | 7322        | 123         | 2713          | 337            | 7165         |
| 22110        | Tsyp1       | 150        | 1266         | 51            | 1560        | 126         | 838           | 42             | 1289         |
| 22113        | Phlda2      | 13         | 10           | 29            | 35          | 16          | 6             | 30             | 55           |
| 22116        | Stk22s1     | 20         | 32           | 42            | 97          | 17          | 25            | 38             | 151          |
| 22117        | Tst         | 9          | 29           | 38            | 45          | 11          | 34            | 39             | 43           |
| 22121        | Rpl13a      | 4171       | 15295        | 2334          | 35981       | 3829        | 12297         | 1822           | 34090        |
| 22122        | Tsta3       | 37         | 341          | 1259          | 2562        | 40          | 280           | 993            | 2117         |
| 22123        | Psmc3       | 75         | 4669         | 2112          | 752         | 75          | 5897          | 1772           | 633          |

| NCBI<br>Gene ID | Gene<br>Symbol | Affy.<br>CD4+ | Agilent<br>CD4+ | Illumina<br>CD4+ | Nimbl.<br>CD4+ | Affy.<br>CD19+ | Agilent<br>CD19+ | Illumina<br>CD19+ | Nimbl.<br>CD19+ |
|-----------------|----------------|---------------|-----------------|------------------|----------------|----------------|------------------|-------------------|-----------------|
| 22127           | Tsx            | 8             | 2               | 24               | 78             | 8              | 3                | 21                | 67              |
| 22129           | Ttc3           | 180           | 368             | 1105             | 2814           | 107            | 226              | 828               | 2384            |
| 22130           | Ttf1           | 61            | 61              | 144              | 1376           | 66             | 43               | 136               | 1240            |
| 22134           | Tgoln1         | 192           | 2204            | 250              | 11638          | 145            | 1452             | 156               | 9096            |
| 22137           | Ttk            | 6             | 4               | 32               | 54             | 8              | 3                | 25                | 116             |
| 22138           | Ttn            | 7             | 18              | 30               | 49             | 7              | 16               | 29                | 48              |
| 22139           | Ttr            | 5             | 2               | 25               | 24             | 5              | 3                | 24                | 96              |
| 22141           | Tub            | 10            | 10              | 35               | 19             | 9              | 12               | 27                | 40              |
| 22152           | Tubb3          | 7             | 315             | 58               | 91             | 6              | 267              | 47                | 61              |
| 22153           | Tubb4          | 13            | 418             | 67               | 335            | 10             | 341              | 52                | 221             |
| 22154           | Tubb5          | 623           | 7357            | 5329             | 4440           | 473            | 7208             | 4199              | 2676            |
| 22156           | Tuft1          | 9             | 49              | 86               | 165            | 12             | 117              | 160               | 340             |
| 22157           | Tulp1          | 14            | 14              | 21               | 93             | 12             | 10               | 56                | 99              |
| 22158           | Tulp3          | 26            | 58              | 59               | 218            | 22             | 27               | 35                | 140             |
| 22160           | Twist1         | 11            | 2               | 48               | 44             | 10             | 3                | 51                | 45              |
| 22163           | Tnfrsf4        | 57            | 818             | 437              | 3039           | 30             | 278              | 113               | 816             |
| 22164           | Tnfsf4         | 5             | 2               | 30               | 17             | 4              | 3                | 28                | 20              |
| 22165           | Txk            | 358           | 2691            | 32               | 3948           | 11             | 92               | 31                | 60              |
| 22166           | Txn1           | 205           | 816             | 26               | 13337          | 230            | 593              | 23                | 13235           |
| 22169           | Tyki           | 17            | 40              | 114              | 191            | 28             | 85               | 242               | 441             |
| 22171           | Tyms           | 17            | 119             | 72               | 1194           | 13             | 175              | 69                | 1258            |
| 22173           | Tyr            | 4             | 3               | 24               | 25             | 5              | 3                | 25                | 28              |
| 22174           | Tyro3          | 21            | 35              | 41               | 276            | 15             | 9                | 28                | 35              |
| 22177           | Tyrobp         | 15            | 9               | 27               | 190            | 38             | 425              | 224               | 2700            |
| 22178           | Tyrp1          | 6             | 2               | 36               | 18             | 6              | 5                | 31                | 21              |
| 22185           | U2af2          | 156           | 37              | 710              | 288            | 163            | 37               | 564               | 211             |
| 22186           | Uba52          | 1648          | 62829           | 17121            | 25287          | 1685           | 66863            | 17092             | 29909           |
| 22192           | Ube2m          | 112           | 434             | 203              | 593            | 101            | 447              | 167               | 528             |
| 22193           | Ube2e3         | 23            | 251             | 61               | 2180           | 23             | 280              | 63                | 1348            |
| 22194           | Ube2e1         | 58            | 322             | 165              | 2884           | 57             | 374              | 166               | 2979            |
| 22195           | Ube2l3         | 196           | 174             | 1307             | 3085           | 215            | 154              | 1335              | 3771            |
| 22196           | Ube2i          | 392           | 2363            | 191              | 6707           | 421            | 2364             | 175               | 6244            |
| 22200           | Ube1c          | 95            | 419             | 492              | 4212           | 91             | 311              | 445               | 2544            |
| 22201           | Ube1x          | 611           | 444             | 1656             | 4249           | 583            | 339              | 1154              | 3140            |
| 22202           | Ube1y1         | 6             | 2               | 26               | 24             | 6              | 3                | 25                | 25              |
| 22209           | Ube2a          | 47            | 294             | 193              | 1445           | 50             | 279              | 237               | 1703            |
| 22210           | Ube2b          | 201           | 2138            | 23               | 12166          | 170            | 1675             | 19                | 9631            |
| 22213           | Ube2g2         | 57            | 712             | 62               | 338            | 56             | 812              | 49                | 251             |
| 22214           | Ube2h          | 484           | 518             | 1293             | 8683           | 291            | 236              | 684               | 5791            |
| 22215           | Ube3a          | 112           | 570             | 42               | 724            | 104            | 441              | 55                | 523             |
| 22217           | Usp12          | 114           | 347             | 43               | 1508           | 111            | 338              | 43                | 1641            |
| 22218           | Sumo1          | 30            | 5200            | 4434             | 4870           | 28             | 5451             | 4157              | 4805            |
| 22221           | Ubp1           | 232           | 718             | 707              | 1894           | 272            | 681              | 893               | 1473            |
| 22222           | Ubr1           | 155           | 247             | 573              | 470            | 142            | 176              | 580               | 382             |
| 22223           | Uchl1          | 8             | 17              | 24               | 31             | 9              | 62               | 30                | 56              |
| 22224           | Usp10          | 70            | 364             | 173              | 3972           | 66             | 321              | 147               | 3737            |
| 22225           | Usp5           | 71            | 117             | 94               | 165            | 77             | 131              | 84                | 165             |
| 22226           | Ucn            | 17            | 11              | 21               | 122            | 16             | 10               | 19                | 127             |
| 22227           | Ucp1           | 5             | 2               | 23               | 39             | 6              | 3                | 24                | 39              |
| 22228           | Ucp2           | 838           | 464             | 1348             | 13505          | 952            | 540              | 1324              | 13108           |
| 22229           | Ucp3           | 8             | 2               | 25               | 34             | 7              | 3                | 28                | 36              |

| NCBI<br>Gene ID | Gene<br>Symbol | Affy.<br>CD4+ | Agilent<br>CD4+ | Illumina<br>CD4+ | Nimbl.<br>CD4+ | Affy.<br>CD19+ | Agilent<br>CD19+ | Illumina<br>CD19+ | Nimbl.<br>CD19+ |
|-----------------|----------------|---------------|-----------------|------------------|----------------|----------------|------------------|-------------------|-----------------|
| 22230           | Ufd1l          | 122           | 250             | 111              | 1418           | 128            | 211              | 103               | 1507            |
| 22232           | Slc35a2        | 31            | 68              | 46               | 600            | 30             | 75               | 47                | 539             |
| 22234           | Ugcg           | 300           | 3118            | 2445             | 10282          | 143            | 1540             | 1348              | 4083            |
| 22235           | Ugdh           | 103           | 451             | 21               | 335            | 107            | 436              | 24                | 276             |
| 22238           | Ugt2b5         | 4             | 2               | 22               | 36             | 4              | 3                | 21                | 31              |
| 22240           | Dpysl3         | 6             | 3               | 17               | 32             | 7              | 3                | 23                | 26              |
| 22241           | Ulk1           | 53            | 820             | 115              | 105            | 32             | 494              | 80                | 70              |
| 22242           | Umod           | 6             | 9               | 24               | 30             | 6              | 7                | 26                | 33              |
| 22245           | Uck1           | 84            | 451             | 842              | 1764           | 90             | 424              | 875               | 1571            |
| 22247           | Umps           | 77            | 405             | 87               | 1142           | 83             | 439              | 82                | 1125            |
| 22248           | Unc119         | 36            | 79              | 64               | 901            | 116            | 451              | 150               | 4520            |
| 22249           | Unc13b         | 8             | 49              | 25               | 15             | 7              | 38               | 28                | 17              |
| 22253           | Unc5c          | 7             | 13              | 27               | 70             | 7              | 15               | 27                | 42              |
| 22255           | Uncx4.1        | 17            | 35              | 40               | 103            | 19             | 25               | 42                | 176             |
| 22256           | Ung            | 27            | 239             | 51               | 471            | 23             | 179              | 38                | 372             |
| 22258           | Usp4           | 249           | 845             | 185              | 1857           | 265            | 1062             | 178               | 1604            |
| 22259           | Nr1h3          | 9             | 36              | 41               | 137            | 9              | 30               | 33                | 83              |
| 22260           | Nr1h2          | 147           | 596             | 295              | 598            | 144            | 561              | 274               | 435             |
| 22264           | Prap1          | 12            | 15              | 28               | 29             | 12             | 16               | 22                | 25              |
| 22268           | Upk1b          | 7             | 2               | 23               | 34             | 8              | 3                | 24                | 35              |
| 22269           | Upk2           | 20            | 6               | 23               | 238            | 22             | 9                | 22                | 310             |
| 22270           | Upk3a          | 14            | 20              | 31               | 21             | 13             | 34               | 30                | 20              |
| 22271           | Upp1           | 6             | 3               | 22               | 54             | 5              | 3                | 25                | 68              |
| 22273           | Uqcrc1         | 171           | 2139            | 1475             | 3856           | 181            | 2730             | 1242              | 3457            |
| 22275           | Urod           | 45            | 1056            | 1559             | 1313           | 38             | 1033             | 1343              | 1315            |
| 22276           | Uros           | 27            | 45              | 224              | 4064           | 22             | 45               | 188               | 4379            |
| 22278           | Usf1           | 41            | 214             | 192              | 1459           | 60             | 391              | 249               | 1737            |
| 22282           | Usf2           | 158           | 486             | 88               | 645            | 143            | 353              | 69                | 477             |
| 22283           | Ush2a          | 7             | 4               | 26               | 49             | 7              | 10               | 24                | 45              |
| 22284           | Usp9x          | 253           | 59              | 43               | 51             | 222            | 44               | 43                | 31              |
| 22286           | Utf1           | 7             | 44              | 25               | 77             | 8              | 42               | 27                | 100             |
| 22287           | Scgb1a1        | 4             | 20              | 29               | 23             | 4              | 22               | 26                | 23              |
| 22288           | Utrn           | 563           | 1197            | 241              | 466            | 95             | 172              | 47                | 283             |
| 22289           | Utx            | 89            | 49              | 472              | 1142           | 72             | 37               | 450               | 962             |
| 22290           | Uty            | 83            | 4               | 42               | 566            | 77             | 3                | 44                | 582             |
| 22294           | Uxt            | 10            | 274             | 666              | 5299           | 10             | 370              | 893               | 6478            |
| 22295           | Cdh23          | 8             | 8               | 37               | 44             | 8              | 10               | 41                | 71              |
| 22296           | V1ra1          | 4             | 19              | 16               | 27             | 4              | 14               | 18                | 33              |
| 22297           | V1ra2          | 5             | 2               | 23               | 20             | 5              | 3                | 22                | 24              |
| 22301           | V2r10          | 4             | 19              | 20               | 16             | 4              | 21               | 24                | 23              |
| 22305           | V2r14          | 4             | 3               | 26               | 13             | 4              | 6                | 28                | 16              |
| 22308           | V2r2           | 4             | 2               | 44               | 38             | 4              | 3                | 45                | 46              |
| 22317           | Vamp1          | 127           | 270             | 138              | 1389           | 96             | 310              | 150               | 1879            |
| 22318           | Vamp2          | 144           | 271             | 345              | 188            | 154            | 287              | 383               | 257             |
| 22319           | Vamp3          | 76            | 33              | 344              | 934            | 83             | 29               | 356               | 1101            |
| 22320           | Vamp8          | 80            | 894             | 510              | 6315           | 86             | 1043             | 636               | 9260            |
| 22323           | Vasp           | 173           | 932             | 8040             | 16429          | 194            | 1004             | 8864              | 15255           |
| 22324           | Vav1           | 263           | 1012            | 2018             | 5641           | 291            | 1057             | 1860              | 5155            |
| 22325           | Vav2           | 28            | 66              | 188              | 150            | 162            | 76               | 1920              | 865             |
| 22326           | Vax1           | 18            | 9               | 28               | 114            | 17             | 7                | 21                | 100             |
| 22327           | Vbp1           | 55            | 476             | 356              | 2487           | 59             | 532              | 401               | 2360            |

| NCBI<br>Gene ID | Gene<br>Symbol | Affy.<br>CD4+ | Agilent<br>CD4+ | Illumina<br>CD4+ | Nimbl.<br>CD4+ | Affy.<br>CD19+ | Agilent<br>CD19+ | Illumina<br>CD19+ | Nimbl.<br>CD19+ |
|-----------------|----------------|---------------|-----------------|------------------|----------------|----------------|------------------|-------------------|-----------------|
| 22329           | Vcam1          | 8             | 6               | 38               | 29             | 9              | 44               | 120               | 71              |
| 22330           | Vcl            | 10            | 9               | 52               | 3838           | 26             | 52               | 323               | 6035            |
| 22333           | Vdac1          | 36            | 1313            | 1721             | 1270           | 37             | 1039             | 1771              | 1137            |
| 22334           | Vdac2          | 147           | 543             | 679              | 9163           | 176            | 581              | 748               | 10402           |
| 22335           | Vdac3          | 86            | 1637            | 99               | 6791           | 107            | 1972             | 111               | 7435            |
| 22337           | Vdr            | 7             | 4               | 24               | 23             | 8              | 3                | 29                | 56              |
| 22339           | Vegfa          | 14            | 16              | 40               | 46             | 15             | 19               | 45                | 82              |
| 22340           | Vegfb          | 43            | 910             | 208              | 183            | 46             | 1030             | 373               | 216             |
| 22341           | Vegfc          | 7             | 4               | 28               | 21             | 6              | 5                | 29                | 32              |
| 22342           | Lin7b          | 26            | 15              | 28               | 56             | 24             | 8                | 23                | 111             |
| 22343           | Lin7c          | 117           | 157             | 75               | 7056           | 149            | 193              | 81                | 4976            |
| 22344           | Vezf1          | 216           | 907             | 750              | 7043           | 215            | 731              | 721               | 7140            |
| 22346           | Vhlh           | 28            | 108             | 87               | 689            | 34             | 182              | 118               | 765             |
| 22349           | Vil1           | 7             | 6               | 41               | 57             | 5              | 2                | 36                | 41              |
| 22350           | Vil2           | 377           | 4166            | 2395             | 9646           | 550            | 5866             | 3295              | 11884           |
| 22352           | Vim            | 478           | 3168            | 2746             | 8049           | 591            | 4079             | 2929              | 7937            |
| 22353           | Vip            | 5             | 3               | 26               | 28             | 5              | 3                | 27                | 37              |
| 22354           | Vipr1          | 143           | 70              | 44               | 108            | 13             | 29               | 25                | 40              |
| 22355           | Vipr2          | 7             | 3               | 31               | 17             | 7              | 4                | 33                | 19              |
| 22359           | Vldlr          | 7             | 12              | 28               | 21             | 6              | 4                | 38                | 24              |
| 22361           | Vnn1           | 5             | 10              | 25               | 28             | 5              | 8                | 27                | 31              |
| 22362           | Vpreb1         | 8             | 63              | 58               | 167            | 10             | 46               | 48                | 165             |
| 22363           | Vpreb2         | 27            | 34              | 29               | 91             | 23             | 34               | 25                | 93              |
| 22364           | Vpreb3         | 11            | 53              | 27               | 46             | 149            | 4725             | 2235              | 5289            |
| 22365           | Vps45          | 35            | 111             | 115              | 314            | 37             | 121              | 127               | 330             |
| 22367           | Vrk1           | 119           | 201             | 499              | 2104           | 119            | 219              | 582               | 1564            |
| 22368           | Trpv2          | 161           | 1131            | 831              | 402            | 180            | 1255             | 887               | 413             |
| 22370           | Vtn            | 6             | 4               | 22               | 26             | 6              | 3                | 23                | 34              |
| 22371           | Vwf            | 10            | 17              | 36               | 45             | 9              | 16               | 38                | 48              |
| 22373           | Wap            | 11            | 14              | 20               | 34             | 10             | 16               | 19                | 57              |
| 22375           | Wars           | 64            | 255             | 331              | 707            | 74             | 371              | 407               | 913             |
| 22376           | Was            | 102           | 2263            | 1787             | 889            | 101            | 1675             | 1389              | 812             |
| 22377           | Wbp1           | 82            | 1158            | 74               | 2224           | 83             | 1341             | 64                | 2334            |
| 22378           | Wbp2           | 146           | 850             | 2433             | 472            | 133            | 811              | 2251              | 449             |
| 22379           | Fmnl3          | 74            | 1694            | 639              | 227            | 118            | 2749             | 1063              | 305             |
| 22380           | Wbp4           | 41            | 297             | 645              | 2821           | 41             | 299              | 541               | 2603            |
| 22381           | Wbp5           | 29            | 448             | 480              | 3832           | 37             | 662              | 581               | 4603            |
| 22385           | Baz1b          | 234           | 120             | 25               | 63             | 218            | 72               | 26                | 50              |
| 22388           | Wdr1           | 557           | 4625            | 1450             | 8099           | 493            | 3472             | 1203              | 5656            |
| 22390           | Wee1           | 16            | 3               | 27               | 74             | 45             | 4                | 31                | 348             |
| 22393           | Wfs1           | 18            | 43              | 40               | 86             | 21             | 70               | 46                | 123             |
| 22402           | Wisp1          | 5             | 3               | 23               | 27             | 5              | 3                | 22                | 20              |
| 22403           | Wisp2          | 43            | 6               | 21               | 46             | 43             | 4                | 19                | 39              |
| 22404           | Wiz            | 62            | 439             | 169              | 215            | 62             | 453              | 142               | 275             |
| 22408           | Wnt1           | 6             | 50              | 28               | 70             | 5              | 56               | 24                | 84              |
| 22409           | Wnt10a         | 20            | 5               | 29               | 70             | 26             | 231              | 124               | 115             |
| 22410           | Wnt10b         | 17            | 3               | 35               | 18             | 18             | 5                | 36                | 35              |
| 22411           | Wnt11          | 10            | 58              | 27               | 40             | 10             | 58               | 26                | 60              |
| 22412           | Wnt9b          | 16            | 38              | 21               | 104            | 16             | 44               | 30                | 86              |
| 22413           | Wnt2           | 10            | 2               | 20               | 30             | 9              | 5                | 19                | 25              |
| 22414           | Wnt2b          | 11            | 2               | 36               | 193            | 10             | 3                | 38                | 178             |

| NCBI<br>Gene ID | Gene<br>Symbol | Affy.<br>CD4+ | Agilent<br>CD4+ | Illumina<br>CD4+ | Nimbl.<br>CD4+ | Affy.<br>CD19+ | Agilent<br>CD19+ | Illumina<br>CD19+ | Nimbl.<br>CD19+ |
|-----------------|----------------|---------------|-----------------|------------------|----------------|----------------|------------------|-------------------|-----------------|
| 22415           | Wnt3           | 8             | 6               | 38               | 83             | 8              | 3                | 33                | 30              |
| 22416           | Wnt3a          | 10            | 5               | 21               | 30             | 10             | 3                | 32                | 29              |
| 22417           | Wnt4           | 10            | 6               | 23               | 99             | 11             | 9                | 24                | 101             |
| 22418           | Wnt5a          | 5             | 3               | 23               | 27             | 5              | 3                | 26                | 31              |
| 22419           | Wnt5b          | 18            | 53              | 43               | 76             | 14             | 20               | 33                | 35              |
| 22420           | Wnt6           | 19            | 47              | 36               | 84             | 16             | 51               | 33                | 102             |
| 22421           | Wnt7a          | 6             | 7               | 28               | 92             | 6              | 9                | 25                | 132             |
| 22422           | Wnt7b          | 18            | 32              | 20               | 24             | 21             | 26               | 24                | 25              |
| 22423           | Wnt8b          | 6             | 7               | 27               | 41             | 6              | 5                | 25                | 42              |
| 22427           | Wrn            | 81            | 40              | 438              | 2844           | 74             | 39               | 405               | 2046            |
| 22428           | Dctn6          | 184           | 2151            | 751              | 9774           | 69             | 766              | 273               | 4602            |
| 22431           | Wt1            | 10            | 2               | 36               | 24             | 10             | 3                | 39                | 23              |
| 22433           | Xbp1           | 79            | 119             | 1098             | 1799           | 112            | 261              | 2511              | 3015            |
| 22436           | Xdh            | 11            | 51              | 89               | 642            | 7              | 9                | 33                | 74              |
| 22441           | Xlr            | 4             | 49              | 26               | 930            | 4              | 54               | 25                | 1145            |
| 22446           | Xlr3b          | 8             | 94              | 24               | 800            | 6              | 90               | 17                | 571             |
| 22589           | Atrx           | 209           | 17              | 25               | 1923           | 199            | 15               | 29                | 1126            |
| 22590           | Xpa            | 73            | 114             | 255              | 12277          | 83             | 111              | 238               | 12887           |
| 22591           | Xpc            | 65            | 463             | 303              | 1441           | 58             | 409              | 238               | 1105            |
| 22592           | Ercc5          | 86            | 80              | 625              | 648            | 49             | 44               | 395               | 331             |
| 22594           | Xrcc1          | 60            | 719             | 222              | 2541           | 83             | 1278             | 299               | 3503            |
| 22596           | Xrcc5          | 92            | 315             | 22               | 1749           | 102            | 305              | 21                | 1603            |
| 22598           | Slc6a18        | 6             | 909             | 20               | 54             | 6              | 3                | 23                | 79              |
| 22599           | Slc6a20        | 8             | 16              | 31               | 18             | 6              | 12               | 28                | 15              |
| 22601           | Yap1           | 9             | 2               | 28               | 31             | 10             | 4                | 30                | 34              |
| 22625           | Ysk4           | 11            | 2               | 24               | 32             | 37             | 22               | 34                | 32              |
| 22626           | Slc23a3        | 14            | 72              | 77               | 441            | 12             | 35               | 41                | 185             |
| 22627           | Ywhae          | 208           | 409             | 103              | 14093          | 240            | 312              | 103               | 13507           |
| 22628           | Ywhag          | 87            | 404             | 2108             | 3246           | 102            | 481              | 2803              | 3663            |
| 22629           | Ywhah          | 413           | 2967            | 58               | 9033           | 370            | 2521             | 48                | 8749            |
| 22630           | Ywhaq          | 67            | 977             | 403              | 9508           | 75             | 1089             | 473               | 9676            |
| 22631           | Ywhaz          | 295           | 1354            | 36               | 14147          | 294            | 1159             | 28                | 10822           |
| 22632           | Yy1            | 277           | 495             | 28               | 14889          | 244            | 339              | 18                | 12841           |
| 22634           | Plagl1         | 7             | 27              | 34               | 587            | 6              | 42               | 34                | 73              |
| 22635           | Zan            | 9             | 7               | 22               | 25             | 9              | 4                | 26                | 27              |
| 22637           | Zap70          | 201           | 2186            | 2008             | 559            | 10             | 72               | 35                | 41              |
| 22639           | Zfa            | 5             | 2               | 26               | 24             | 4              | 3                | 30                | 19              |
| 22640           | Zfp1           | 61            | 199             | 488              | 1876           | 47             | 158              | 355               | 1193            |
| 22642           | Zbtb17         | 44            | 541             | 745              | 3826           | 47             | 520              | 688               | 3848            |
| 22644           | Rnf103         | 69            | 151             | 547              | 764            | 53             | 71               | 363               | 435             |
| 22648           | Zfp11          | 7             | 24              | 22               | 81             | 6              | 21               | 18                | 44              |
| 22652           | Mkrn3          | 5             | 2               | 29               | 51             | 5              | 3                | 33                | 46              |
| 22654           | Zfp13          | 18            | 58              | 32               | 71             | 18             | 68               | 28                | 52              |
| 22661           | Zfp148         | 241           | 762             | 378              | 3849           | 231            | 645              | 275               | 3065            |
| 22666           | Zfp161         | 83            | 126             | 110              | 3563           | 71             | 106              | 89                | 5086            |
| 22670           | Trim26         | 73            | 1946            | 1226             | 5813           | 74             | 2637             | 1424              | 6276            |
| 22671           | Zfp179         | 9             | 31              | 34               | 69             | 9              | 41               | 33                | 48              |
| 22673           | Zfp185         | 5             | 5               | 25               | 42             | 5              | 3                | 24                | 16              |
| 22678           | Zfp2           | 16            | 14              | 35               | 218            | 18             | 13               | 39                | 204             |
| 22680           | Zfp207         | 244           | 493             | 531              | 4943           | 274            | 633              | 662               | 5247            |
| 22685           | Zfp239         | 10            | 23              | 19               | 32             | 10             | 66               | 27                | 72              |

| NCBI<br>Gene ID | Gene<br>Symbol | Affy.<br>CD4+ | Agilent<br>CD4+ | Illumina<br>CD4+ | Nimbl.<br>CD4+ | Affy.<br>CD19+ | Agilent<br>CD19+ | Illumina<br>CD19+ | Nimbl.<br>CD19+ |
|-----------------|----------------|---------------|-----------------|------------------|----------------|----------------|------------------|-------------------|-----------------|
| 22687           | Zfp259         | 114           | 382             | 1126             | 3545           | 126            | 409              | 1127              | 3516            |
| 22688           | Zfp26          | 65            | 648             | 104              | 315            | 65             | 568              | 118               | 321             |
| 22693           | Zfp30          | 8             | 8               | 32               | 117            | 8              | 3                | 25                | 143             |
| 22694           | Zfp35          | 23            | 371             | 136              | 496            | 29             | 467              | 143               | 770             |
| 22695           | Zfp36          | 298           | 1574            | 2227             | 2459           | 491            | 2471             | 3145              | 2988            |
| 22701           | Zfp41          | 19            | 51              | 59               | 52             | 18             | 47               | 58                | 52              |
| 22702           | Zfp42          | 7             | 3               | 27               | 28             | 8              | 4                | 31                | 36              |
| 22704           | Zfp46          | 12            | 262             | 340              | 1851           | 15             | 232              | 348               | 2615            |
| 22715           | Zfp57          | 6             | 13              | 22               | 55             | 7              | 9                | 25                | 60              |
| 22718           | Zfp60          | 4             | 209             | 39               | 165            | 4              | 152              | 38                | 237             |
| 22720           | Zfp62          | 98            | 374             | 75               | 919            | 139            | 556              | 101               | 1331            |
| 22722           | Zfp64          | 47            | 810             | 279              | 268            | 44             | 508              | 184               | 191             |
| 22746           | Zfp85-rs1      | 19            | 9               | 73               | 967            | 16             | 11               | 65                | 1087            |
| 22754           | Zfp92          | 5             | 2               | 25               | 21             | 5              | 3                | 16                | 25              |
| 22755           | Zfp235         | 10            | 86              | 100              | 1650           | 12             | 79               | 77                | 1308            |
| 22761           | Zfpm1          | 115           | 1613            | 1513             | 110            | 88             | 1187             | 914               | 81              |
| 22762           | Zfpm2          | 8             | 4               | 34               | 16             | 9              | 6                | 26                | 17              |
| 22763           | Zfr            | 249           | 81              | 22               | 7240           | 252            | 91               | 22                | 7576            |
| 22764           | Zfx            | 137           | 479             | 590              | 1224           | 146            | 438              | 596               | 846             |
| 22767           | Zfy1           | 4             | 20              | 20               | 32             | 4              | 19               | 23                | 29              |
| 22768           | Zfy2           | 4             | 6               | 44               | 25             | 4              | 6                | 41                | 42              |
| 22770           | Zhx1           | 73            | 184             | 186              | 1594           | 77             | 247              | 191               | 1624            |
| 22771           | Zic1           | 6             | 7               | 23               | 23             | 4              | 11               | 28                | 38              |
| 22772           | Zic2           | 5             | 2               | 26               | 29             | 6              | 4                | 29                | 32              |
| 22773           | Zic3           | 7             | 2               | 27               | 23             | 7              | 3                | 29                | 33              |
| 22774           | Zic4           | 6             | 14              | 42               | 68             | 6              | 21               | 30                | 57              |
| 22775           | Zik1           | 5             | 14              | 20               | 206            | 5              | 14               | 20                | 149             |
| 22782           | Slc30a1        | 51            | 216             | 533              | 5298           | 37             | 104              | 340               | 2509            |
| 22784           | Slc30a3        | 19            | 3               | 33               | 114            | 17             | 3                | 30                | 180             |
| 22785           | Slc30a4        | 19            | 73              | 43               | 93             | 28             | 79               | 41                | 91              |
| 22787           | Zp2            | 5             | 2               | 20               | 17             | 6              | 3                | 21                | 17              |
| 22788           | Zp3            | 7             | 7               | 40               | 50             | 7              | 9                | 36                | 54              |
| 22789           | Zp3r           | 4             | 2               | 23               | 25             | 4              | 3                | 24                | 21              |
| 22791           | Dnajc2         | 62            | 272             | 133              | 4177           | 67             | 261              | 152               | 4233            |
| 22793           | Zyx            | 119           | 3015            | 3201             | 451            | 72             | 1293             | 1479              | 201             |
| 23789           | Coro1b         | 325           | 308             | 71               | 1940           | 403            | 388              | 70                | 1830            |
| 23790           | Coro1c         | 217           | 9               | 1063             | 1901           | 130            | 4                | 638               | 1653            |
| 23792           | Adam23         | 7             | 3               | 30               | 27             | 7              | 3                | 32                | 31              |
| 23793           | Adam25         | 4             | 10              | 20               | 16             | 4              | 11               | 23                | 18              |
| 23794           | Adamts5        | 5             | 4               | 24               | 26             | 6              | 9                | 24                | 21              |
| 23795           | Agr2           | 5             | 4               | 36               | 41             | 5              | 3                | 37                | 42              |
| 23796           | Agtrl1         | 12            | 30              | 34               | 23             | 12             | 26               | 30                | 20              |
| 23797           | Akt3           | 147           | 47              | 94               | 618            | 222            | 56               | 132               | 1134            |
| 23801           | Aloxe3         | 5             | 3               | 38               | 44             | 6              | 3                | 35                | 49              |
| 23802           | Amfr           | 138           | 445             | 1658             | 1961           | 161            | 438              | 1674              | 2007            |
| 23805           | Apc2           | 7             | 92              | 29               | 39             | 7              | 87               | 28                | 33              |
| 23806           | Arih1          | 415           | 247             | 155              | 1522           | 379            | 220              | 123               | 1069            |
| 23807           | Arih2          | 176           | 43              | 876              | 1493           | 162            | 44               | 769               | 1191            |
| 23808           | Ash2l          | 130           | 281             | 92               | 2507           | 115            | 224              | 96                | 2060            |
| 23821           | Bace1          | 21            | 37              | 94               | 974            | 19             | 26               | 88                | 869             |
| 23825           | Banf1          | 214           | 1171            | 989              | 2375           | 215            | 1365             | 969               | 2474            |

| NCBI Gene ID | Gene Symbol | Affy. CD4+ | Agilent CD4+ | Illumina CD4+ | Nimbl. CD4+ | Affy. CD19+ | Agilent CD19+ | Illumina CD19+ | Nimbl. CD19+ |
|--------------|-------------|------------|--------------|---------------|-------------|-------------|---------------|----------------|--------------|
| 23827        | Bpnt1       | 39         | 145          | 320           | 1178        | 40          | 141           | 318            | 706          |
| 23828        | Bves        | 5          | 4            | 32            | 24          | 5           | 5             | 27             | 34           |
| 23829        | C1q1        | 13         | 2            | 28            | 56          | 12          | 6             | 28             | 57           |
| 23830        | Capn10      | 22         | 234          | 68            | 196         | 27          | 250           | 89             | 282          |
| 23831        | Car14       | 6          | 28           | 29            | 102         | 7           | 24            | 28             | 121          |
| 23832        | Xcr1        | 12         | 129          | 34            | 18          | 11          | 169           | 29             | 22           |
| 23833        | Cd52        | 805        | 29103        | 4750          | 35665       | 1148        | 38436         | 5774           | 38469        |
| 23834        | Cdc6        | 13         | 5            | 50            | 25          | 13          | 22            | 69             | 30           |
| 23836        | Cdh20       | 6          | 18           | 25            | 26          | 5           | 11            | 22             | 22           |
| 23837        | Cfdp1       | 107        | 1192         | 714           | 93          | 115         | 1309          | 707            | 105          |
| 23844        | Clca3       | 7          | 3            | 23            | 30          | 7           | 4             | 24             | 32           |
| 23853        | Def6        | 172        | 5514         | 1318          | 8618        | 97          | 2587          | 610            | 4634         |
| 23854        | Def8        | 17         | 249          | 33            | 444         | 17          | 271           | 36             | 464          |
| 23856        | Dido1       | 174        | 676          | 398           | 6285        | 180         | 706           | 301            | 6411         |
| 23857        | Dmtf1       | 136        | 437          | 1750          | 1714        | 116         | 293           | 1179           | 3315         |
| 23871        | Ets1        | 1228       | 5561         | 91            | 12161       | 887         | 3313          | 68             | 7539         |
| 23872        | Ets2        | 79         | 379          | 910           | 3511        | 44          | 151           | 423            | 1963         |
| 23873        | Faim        | 26         | 287          | 176           | 1154        | 24          | 350           | 173            | 1060         |
| 23876        | Fbln5       | 8          | 5            | 29            | 31          | 9           | 6             | 29             | 33           |
| 23877        | Fiz1        | 55         | 160          | 556           | 1373        | 53          | 140           | 517            | 1291         |
| 23880        | Fyb         | 505        | 6731         | 811           | 11414       | 7           | 207           | 28             | 60           |
| 23882        | Gadd45g     | 13         | 509          | 56            | 311         | 34          | 2690          | 172            | 1550         |
| 23886        | Gdf15       | 6          | 37           | 23            | 161         | 6           | 15            | 24             | 108          |
| 23887        | Ggta1       | 47         | 504          | 148           | 636         | 11          | 23            | 26             | 27           |
| 23888        | Gpc6        | 8          | 4            | 27            | 58          | 8           | 5             | 25             | 46           |
| 23890        | Gpr34       | 5          | 12           | 74            | 329         | 4           | 6             | 60             | 148          |
| 23892        | Grem1       | 8          | 2            | 28            | 29          | 8           | 3             | 29             | 28           |
| 23893        | Grem2       | 10         | 4            | 41            | 35          | 10          | 3             | 37             | 21           |
| 23894        | Gtf2h2      | 47         | 200          | 752           | 2898        | 61          | 213           | 937            | 2213         |
| 23900        | Hcst        | 76         | 2044         | 2791          | 4490        | 35          | 424           | 622            | 1934         |
| 23908        | Hs2st1      | 33         | 63           | 62            | 237         | 22          | 39            | 44             | 109          |
| 23917        | Impdh1      | 99         | 1125         | 716           | 857         | 32          | 215           | 151            | 208          |
| 23918        | Impdh2      | 131        | 913          | 2197          | 1239        | 158         | 1026          | 2289           | 1164         |
| 23919        | InsI5       | 7          | 78           | 31            | 36          | 7           | 68            | 28             | 19           |
| 23920        | Insrr       | 6          | 36           | 25            | 54          | 7           | 32            | 26             | 52           |
| 23922        | Jtb         | 128        | 1147         | 1170          | 3191        | 154         | 1489          | 1482           | 3442         |
| 23923        | Aadat       | 5          | 6            | 28            | 32          | 5           | 8             | 27             | 47           |
| 23924        | Katna1      | 137        | 720          | 24            | 2190        | 133         | 592           | 22             | 1635         |
| 23925        | Kel         | 6          | 3            | 19            | 15          | 6           | 3             | 21             | 13           |
| 23927        | Krtap14     | 8          | 2            | 27            | 28          | 7           | 3             | 26             | 24           |
| 23928        | Lamc3       | 21         | 17           | 30            | 23          | 18          | 16            | 29             | 31           |
| 23934        | Ly6h        | 11         | 54           | 37            | 59          | 8           | 32            | 33             | 73           |
| 23936        | Lynx1       | 16         | 68           | 71            | 106         | 132         | 1315          | 925            | 1101         |
| 23937        | Mab2112     | 9          | 2            | 25            | 190         | 11          | 3             | 25             | 108          |
| 23938        | Map2k5      | 121        | 39           | 210           | 1422        | 111         | 32            | 172            | 1386         |
| 23939        | Mapk7       | 51         | 686          | 30            | 195         | 52          | 535           | 34             | 234          |
| 23942        | Mta2        | 248        | 1661         | 1219          | 150         | 276         | 1721          | 1096           | 118          |
| 23943        | Mbc2        | 448        | 3081         | 3681          | 7538        | 360         | 2103          | 2695           | 5320         |
| 23945        | Mgl1        | 6          | 14           | 26            | 45          | 8           | 22            | 31             | 75           |
| 23947        | Mid2        | 5          | 16           | 24            | 18          | 4           | 13            | 25             | 28           |
| 23948        | Mmp17       | 10         | 68           | 28            | 117         | 10          | 68            | 27             | 182          |



| NCBI<br>Gene ID | Gene<br>Symbol | Affy.<br>CD4+ | Agilent<br>CD4+ | Illumina<br>CD4+ | Nimbl.<br>CD4+ | Affy.<br>CD19+ | Agilent<br>CD19+ | Illumina<br>CD19+ | Nimbl.<br>CD19+ |
|-----------------|----------------|---------------|-----------------|------------------|----------------|----------------|------------------|-------------------|-----------------|
| 23950           | Dnajb6         | 260           | 255             | 143              | 10622          | 239            | 256              | 105               | 9612            |
| 23954           | Nek3           | 22            | 76              | 361              | 1840           | 20             | 63               | 303               | 1950            |
| 23955           | Nek4           | 20            | 30              | 45               | 116            | 21             | 65               | 43                | 124             |
| 23956           | Neu2           | 7             | 71              | 29               | 39             | 8              | 63               | 29                | 41              |
| 23957           | Nr0b2          | 5             | 9               | 20               | 31             | 5              | 13               | 26                | 32              |
| 23958           | Nr2e3          | 11            | 3               | 27               | 81             | 10             | 4                | 27                | 96              |
| 23959           | Nt5e           | 29            | 99              | 103              | 170            | 11             | 6                | 30                | 24              |
| 23960           | Oas1g          | 10            | 4               | 103              | 20             | 15             | 3                | 149               | 20              |
| 23962           | Oasl2          | 28            | 81              | 32               | 840            | 23             | 80               | 28                | 883             |
| 23963           | Odz1           | 5             | 4               | 30               | 22             | 5              | 3                | 29                | 21              |
| 23964           | Odz2           | 14            | 9               | 47               | 29             | 14             | 9                | 47                | 33              |
| 23965           | Odz3           | 5             | 9               | 32               | 27             | 5              | 3                | 31                | 29              |
| 23966           | Odz4           | 8             | 18              | 34               | 17             | 9              | 17               | 46                | 105             |
| 23967           | Osr1           | 5             | 37              | 209              | 40             | 6              | 33               | 169               | 31              |
| 23969           | Pacsin1        | 98            | 973             | 946              | 1097           | 42             | 255              | 216               | 409             |
| 23970           | Pacsin2        | 49            | 95              | 27               | 1078           | 74             | 132              | 31                | 1599            |
| 23971           | Papss1         | 34            | 242             | 183              | 305            | 30             | 185              | 157               | 283             |
| 23972           | Papss2         | 6             | 5               | 24               | 78             | 5              | 4                | 26                | 26              |
| 23983           | Pcbp1          | 358           | 8976            | 1154             | 1353           | 337            | 7354             | 885               | 1177            |
| 23984           | Pde10a         | 7             | 5               | 37               | 31             | 7              | 4                | 42                | 41              |
| 23985           | Slc26a4        | 5             | 3               | 25               | 32             | 5              | 4                | 22                | 43              |
| 23986           | Peci           | 34            | 1568            | 27               | 4006           | 28             | 1300             | 31                | 3628            |
| 23988           | Pin1           | 57            | 497             | 26               | 2210           | 59             | 706              | 29                | 2942            |
| 23991           | Cib1           | 43            | 1378            | 927              | 1018           | 73             | 3003             | 1506              | 1250            |
| 23992           | Prkra          | 5             | 28              | 87               | 68             | 5              | 39               | 89                | 89              |
| 23993           | Klk7           | 13            | 29              | 25               | 37             | 12             | 38               | 28                | 43              |
| 23994           | Dazap2         | 486           | 6447            | 2995             | 21378          | 723            | 8598             | 3945              | 22781           |
| 23996           | Psmc4          | 88            | 1240            | 1906             | 5542           | 92             | 1479             | 1834              | 5081            |
| 23997           | Psmd13         | 74            | 49              | 1119             | 3524           | 78             | 60               | 1004              | 3263            |
| 24000           | Ptpn21         | 10            | 22              | 44               | 44             | 13             | 32               | 48                | 47              |
| 24001           | Tiam2          | 6             | 12              | 22               | 153            | 5              | 8                | 25                | 84              |
| 24004           | Rai2           | 5             | 2               | 23               | 24             | 4              | 3                | 27                | 26              |
| 24010           | Ik             | 167           | 4315            | 1266             | 4826           | 182            | 5333             | 1150              | 4473            |
| 24012           | Rgs7           | 4             | 2               | 23               | 64             | 4              | 3                | 23                | 51              |
| 24013           | Grk1           | 7             | 2               | 26               | 37             | 6              | 3                | 27                | 39              |
| 24014           | Rnasel         | 53            | 159             | 29               | 212            | 19             | 70               | 30                | 108             |
| 24015           | Abce1          | 296           | 744             | 27               | 10222          | 316            | 732              | 29                | 8832            |
| 24017           | Rnf13          | 47            | 26              | 25               | 921            | 82             | 53               | 24                | 2493            |
| 24018           | Rngtt          | 187           | 260             | 209              | 238            | 116            | 132              | 140               | 162             |
| 24030           | Mrps12         | 36            | 1221            | 1159             | 1804           | 31             | 1015             | 1124              | 1920            |
| 24044           | Scamp2         | 85            | 540             | 1147             | 2087           | 110            | 828              | 1555              | 2258            |
| 24045           | Scamp3         | 285           | 1285            | 350              | 4912           | 190            | 788              | 210               | 2899            |
| 24046           | Scn11a         | 6             | 11              | 30               | 64             | 6              | 19               | 32                | 61              |
| 24047           | Ccl19          | 9             | 47              | 29               | 47             | 9              | 39               | 28                | 72              |
| 24050           | 3-Sep          | 7             | 3               | 26               | 36             | 7              | 3                | 22                | 73              |
| 24051           | Sgcb           | 23            | 63              | 77               | 857            | 21             | 41               | 75                | 552             |
| 24052           | Sgcd           | 5             | 5               | 79               | 21             | 6              | 5                | 79                | 23              |
| 24053           | Sgcg           | 6             | 37              | 26               | 27             | 5              | 31               | 23                | 29              |
| 24055           | Sh3bp2         | 32            | 9               | 171              | 40             | 205            | 78               | 1262              | 244             |
| 24056           | Sh3bp5         | 100           | 364             | 48               | 13405          | 319            | 1525             | 51                | 23796           |
| 24057           | Sh3yl1         | 5             | 4               | 61               | 229            | 5              | 14               | 97                | 352             |

| NCBI Gene ID | Gene Symbol | Affy. CD4+ | Agilent CD4+ | Illumina CD4+ | Nimbl. CD4+ | Affy. CD19+ | Agilent CD19+ | Illumina CD19+ | Nimbl. CD19+ |
|--------------|-------------|------------|--------------|---------------|-------------|-------------|---------------|----------------|--------------|
| 24059        | Slco2a1     | 6          | 79           | 36            | 31          | 6           | 77            | 34             | 67           |
| 24060        | Slc35a1     | 34         | 36           | 357           | 598         | 37          | 38            | 382            | 448          |
| 24063        | Spry1       | 23         | 79           | 34            | 106         | 18          | 44            | 34             | 80           |
| 24064        | Spry2       | 6          | 45           | 25            | 76          | 10          | 41            | 24             | 95           |
| 24066        | Spry4       | 6          | 2            | 30            | 28          | 6           | 3             | 27             | 28           |
| 24068        | Sra1        | 92         | 1952         | 220           | 7912        | 92          | 2094          | 184            | 6926         |
| 24069        | Sufu        | 69         | 227          | 165           | 60          | 89          | 538           | 364            | 81           |
| 24070        | Mpdu1       | 93         | 231          | 59            | 238         | 96          | 275           | 55             | 229          |
| 24071        | Synj2bp     | 46         | 1006         | 181           | 2847        | 34          | 876           | 133            | 3088         |
| 24074        | Taf7        | 48         | 120          | 35            | 1138        | 45          | 67            | 35             | 961          |
| 24075        | Taf10       | 236        | 2011         | 1293          | 4683        | 238         | 1825          | 1042           | 4948         |
| 24082        | Gtlf3a      | 6          | 7            | 21            | 53          | 6           | 12            | 25             | 40           |
| 24083        | Gtlf3b      | 42         | 416          | 38            | 196         | 47          | 532           | 38             | 195          |
| 24084        | Tekt2       | 6          | 5            | 26            | 44          | 6           | 7             | 21             | 79           |
| 24086        | Tlk2        | 108        | 225          | 324           | 2356        | 87          | 166           | 278            | 1818         |
| 24087        | Tll2        | 10         | 2            | 29            | 20          | 10          | 4             | 26             | 22           |
| 24088        | Tlr2        | 14         | 33           | 68            | 118         | 24          | 207           | 234            | 399          |
| 24099        | Tnfsf13b    | 7          | 43           | 29            | 120         | 7           | 40            | 31             | 105          |
| 24102        | Trex2       | 7          | 17           | 25            | 22          | 8           | 13            | 26             | 22           |
| 24108        | Ubd         | 5          | 2            | 29            | 30          | 5           | 6             | 31             | 48           |
| 24109        | Ubl3        | 172        | 598          | 1195          | 5964        | 258         | 944           | 2276           | 8835         |
| 24110        | Usp18       | 38         | 219          | 157           | 742         | 25          | 96            | 83             | 326          |
| 24111        | Uts2        | 10         | 2            | 33            | 29          | 9           | 3             | 31             | 33           |
| 24112        | V1rb2       | 4          | 3            | 22            | 17          | 4           | 3             | 24             | 23           |
| 24113        | Vax2        | 12         | 3            | 30            | 89          | 12          | 7             | 28             | 89           |
| 24116        | Whsc2       | 82         | 458          | 653           | 633         | 79          | 513           | 671            | 609          |
| 24117        | Wif1        | 7          | 4            | 23            | 54          | 6           | 3             | 27             | 63           |
| 24127        | Xrn1        | 150        | 73           | 73            | 3041        | 119         | 58            | 71             | 1999         |
| 24128        | Xrn2        | 280        | 1127         | 77            | 8128        | 307         | 916           | 76             | 7140         |
| 24131        | Ldb3        | 12         | 25           | 34            | 66          | 11          | 27            | 35             | 46           |
| 24132        | Zfp53       | 45         | 234          | 26            | 1553        | 25          | 91            | 26             | 582          |
| 26356        | Ing1        | 90         | 2760         | 534           | 12337       | 80          | 1889          | 380            | 8820         |
| 26357        | Abcg2       | 19         | 90           | 30            | 1199        | 7           | 10            | 29             | 119          |
| 26358        | Aldh1a7     | 6          | 4            | 29            | 18          | 6           | 5             | 26             | 26           |
| 26359        | Anxa10      | 4          | 5            | 40            | 34          | 4           | 5             | 37             | 36           |
| 26360        | Angptl2     | 16         | 5            | 31            | 88          | 15          | 6             | 28             | 97           |
| 26361        | Avpr1b      | 5          | 7            | 30            | 31          | 5           | 13            | 31             | 24           |
| 26362        | Axl         | 9          | 4            | 70            | 181         | 8           | 3             | 67             | 127          |
| 26363        | Btd         | 18         | 172          | 55            | 114         | 21          | 230           | 61             | 153          |
| 26364        | Cd97        | 548        | 12661        | 1376          | 18896       | 500         | 12192         | 1009           | 12725        |
| 26365        | Ceacam1     | 8          | 5            | 34            | 31          | 155         | 125           | 130            | 1715         |
| 26366        | Ceacam10    | 7          | 4            | 29            | 42          | 5           | 3             | 29             | 50           |
| 26367        | Ceacam2     | 8          | 19           | 36            | 41          | 14          | 1912          | 813            | 1943         |
| 26368        | Ceacam9     | 6          | 3            | 27            | 58          | 6           | 3             | 25             | 70           |
| 26369        | Cetn1       | 7          | 87           | 22            | 43          | 8           | 79            | 22             | 52           |
| 26370        | Cetn2       | 27         | 486          | 144           | 6666        | 36          | 641           | 184            | 7480         |
| 26372        | Clcn6       | 58         | 20           | 27            | 77          | 64          | 20            | 29             | 97           |
| 26373        | Clcn7       | 52         | 226          | 259           | 249         | 54          | 194           | 230            | 225          |
| 26377        | Dapp1       | 45         | 150          | 138           | 3973        | 93          | 334           | 329            | 7462         |
| 26378        | Decr2       | 32         | 55           | 26            | 105         | 26          | 27            | 27             | 52           |
| 26379        | Esrra       | 52         | 557          | 210           | 104         | 60          | 929           | 229            | 146          |

| NCBI<br>Gene ID | Gene<br>Symbol | Affy.<br>CD4+ | Agilent<br>CD4+ | Illumina<br>CD4+ | Nimbl.<br>CD4+ | Affy.<br>CD19+ | Agilent<br>CD19+ | Illumina<br>CD19+ | Nimbl.<br>CD19+ |
|-----------------|----------------|---------------|-----------------|------------------|----------------|----------------|------------------|-------------------|-----------------|
| 26380           | Esrrb          | 6             | 19              | 57               | 41             | 6              | 15               | 61                | 46              |
| 26381           | Esrrg          | 10            | 116             | 30               | 19             | 10             | 90               | 31                | 25              |
| 26382           | Fgd2           | 23            | 4               | 28               | 42             | 253            | 1812             | 2110              | 2890            |
| 26383           | Fto            | 96            | 525             | 688              | 278            | 77             | 515              | 561               | 185             |
| 26384           | Gnpda1         | 57            | 234             | 72               | 965            | 71             | 253              | 70                | 956             |
| 26386           | Hsf4           | 9             | 2               | 30               | 58             | 9              | 4                | 29                | 61              |
| 26388           | Ifi202b        | 4             | 2               | 25               | 24             | 4              | 3                | 23                | 24              |
| 26390           | Mapkbp1        | 23            | 33              | 164              | 126            | 23             | 23               | 143               | 127             |
| 26394           | Lypla2         | 124           | 5617            | 4880             | 272            | 125            | 5540             | 4485              | 241             |
| 26395           | Map2k1         | 146           | 401             | 88               | 1198           | 318            | 789              | 168               | 2112            |
| 26396           | Map2k2         | 120           | 1105            | 910              | 2402           | 123            | 1020             | 873               | 2201            |
| 26397           | Map2k3         | 43            | 140             | 478              | 435            | 51             | 100              | 440               | 424             |
| 26398           | Map2k4         | 80            | 240             | 417              | 2909           | 82             | 178              | 420               | 3092            |
| 26399           | Map2k6         | 59            | 117             | 64               | 1784           | 39             | 76               | 52                | 366             |
| 26400           | Map2k7         | 97            | 146             | 78               | 1407           | 90             | 127              | 57                | 1048            |
| 26401           | Map3k1         | 240           | 2070            | 2497             | 43             | 535            | 3957             | 4665              | 57              |
| 26403           | Map3k11        | 124           | 279             | 593              | 224            | 138            | 289              | 580               | 223             |
| 26404           | Map3k12        | 50            | 94              | 216              | 155            | 18             | 20               | 52                | 78              |
| 26405           | Map3k2         | 77            | 4               | 27               | 60             | 67             | 3                | 31                | 68              |
| 26406           | Map3k3         | 235           | 344             | 778              | 811            | 163            | 170              | 433               | 473             |
| 26407           | Map3k4         | 76            | 950             | 45               | 474            | 67             | 805              | 41                | 264             |
| 26408           | Map3k5         | 99            | 64              | 48               | 196            | 225            | 207              | 71                | 271             |
| 26409           | Map3k7         | 178           | 17              | 294              | 342            | 163            | 18               | 348               | 238             |
| 26410           | Map3k8         | 28            | 23              | 86               | 245            | 161            | 115              | 472               | 1101            |
| 26411           | Map4k1         | 182           | 2333            | 684              | 2904           | 504            | 7992             | 1804              | 7551            |
| 26412           | Map4k2         | 615           | 648             | 2446             | 730            | 678            | 692              | 2303              | 822             |
| 26413           | Mapk1          | 384           | 661             | 1474             | 3995           | 412            | 664              | 1627              | 3178            |
| 26414           | Mapk10         | 5             | 2               | 27               | 94             | 5              | 3                | 28                | 137             |
| 26415           | Mapk13         | 11            | 12              | 26               | 46             | 14             | 18               | 23                | 48              |
| 26416           | Mapk14         | 176           | 1735            | 817              | 9111           | 143            | 1057             | 569               | 7061            |
| 26417           | Mapk3          | 53            | 227             | 51               | 433            | 59             | 244              | 56                | 390             |
| 26419           | Mapk8          | 90            | 360             | 143              | 5143           | 75             | 234              | 131               | 3000            |
| 26420           | Mapk9          | 58            | 93              | 512              | 292            | 59             | 76               | 578               | 236             |
| 26423           | Nr5a1          | 20            | 28              | 74               | 52             | 21             | 33               | 80                | 82              |
| 26424           | Nr5a2          | 6             | 7               | 30               | 27             | 6              | 5                | 30                | 39              |
| 26425           | Nubp1          | 68            | 1203            | 1089             | 4982           | 98             | 1677             | 1709              | 7560            |
| 26426           | Nubp2          | 111           | 369             | 221              | 5215           | 123            | 529              | 238               | 7150            |
| 26427           | Creb3l1        | 7             | 15              | 33               | 160            | 7              | 24               | 25                | 208             |
| 26428           | Orc4l          | 107           | 254             | 66               | 1575           | 86             | 194              | 64                | 973             |
| 26429           | Orc5l          | 62            | 62              | 262              | 163            | 48             | 49               | 180               | 77              |
| 26430           | Parg           | 103           | 615             | 403              | 751            | 97             | 558              | 390               | 772             |
| 26431           | Git2           | 200           | 514             | 527              | 1408           | 176            | 359              | 388               | 880             |
| 26432           | Plod2          | 5             | 26              | 30               | 36             | 5              | 10               | 32                | 34              |
| 26433           | Plod3          | 24            | 204             | 478              | 123            | 30             | 276              | 581               | 167             |
| 26434           | Prnd           | 5             | 2               | 32               | 25             | 5              | 3                | 25                | 30              |
| 26436           | Psg16          | 4             | 4               | 32               | 1584           | 4              | 3                | 32                | 1063            |
| 26438           | Psg18          | 5             | 2               | 24               | 25             | 5              | 3                | 23                | 30              |
| 26439           | Psg19          | 5             | 9               | 23               | 17             | 5              | 5                | 26                | 16              |
| 26440           | Psm1           | 157           | 1434            | 514              | 3971           | 207            | 1605             | 637               | 3429            |
| 26441           | Psm4           | 229           | 291             | 1375             | 6520           | 230            | 252              | 1276              | 6141            |
| 26442           | Psm5           | 76            | 3204            | 28               | 3038           | 83             | 3996             | 29                | 2696            |

| NCBI<br>Gene ID | Gene<br>Symbol | Affy.<br>CD4+ | Agilent<br>CD4+ | Illumina<br>CD4+ | Nimbl.<br>CD4+ | Affy.<br>CD19+ | Agilent<br>CD19+ | Illumina<br>CD19+ | Nimbl.<br>CD19+ |
|-----------------|----------------|---------------|-----------------|------------------|----------------|----------------|------------------|-------------------|-----------------|
| 26443           | PsmA6          | 232           | 1588            | 36               | 8310           | 236            | 1428             | 31                | 7294            |
| 26444           | PsmA7          | 138           | 4054            | 933              | 12930          | 137            | 3880             | 849               | 12169           |
| 26445           | PsmB2          | 99            | 225             | 1658             | 4074           | 124            | 255              | 1768              | 3818            |
| 26446           | PsmB3          | 199           | 6546            | 2423             | 15439          | 174            | 7032             | 2138              | 13358           |
| 26447           | Poli           | 134           | 536             | 307              | 2535           | 126            | 531              | 285               | 2382            |
| 26448           | Rage           | 7             | 20              | 50               | 84             | 6              | 21               | 41                | 132             |
| 26450           | Rbbp9          | 21            | 34              | 205              | 623            | 21             | 27               | 215               | 520             |
| 26451           | Rpl27a         | 1903          | 1296            | 13546            | 38299          | 1872           | 1502             | 13139             | 38475           |
| 26456           | Sema4g         | 7             | 2               | 30               | 50             | 8              | 3                | 27                | 54              |
| 26457           | Slc27a1        | 27            | 137             | 42               | 38             | 29             | 310              | 51                | 32              |
| 26458           | Slc27a2        | 6             | 4               | 28               | 31             | 5              | 4                | 22                | 35              |
| 26459           | Slc27a5        | 6             | 23              | 39               | 30             | 6              | 6                | 31                | 28              |
| 26462           | Txnrd2         | 25            | 185             | 138              | 820            | 26             | 255              | 207               | 1595            |
| 26464           | Vnn3           | 7             | 3               | 29               | 35             | 7              | 3                | 30                | 35              |
| 26465           | Zfp146         | 133           | 9               | 28               | 82             | 126            | 3                | 29                | 56              |
| 26466           | Zfp260         | 86            | 7               | 659              | 822            | 51             | 10               | 424               | 481             |
| 26549           | Itgb1bp2       | 20            | 13              | 32               | 76             | 16             | 10               | 29                | 77              |
| 26554           | Cul3           | 547           | 1118            | 2089             | 10112          | 450            | 652              | 1569              | 7054            |
| 26556           | Homer1         | 21            | 10              | 72               | 283            | 18             | 17               | 94                | 381             |
| 26557           | Homer2         | 9             | 14              | 25               | 60             | 9              | 13               | 25                | 61              |
| 26558           | Homer3         | 29            | 81              | 41               | 1059           | 35             | 97               | 43                | 1193            |
| 26559           | Hunk           | 10            | 2               | 19               | 67             | 9              | 3                | 21                | 60              |
| 26560           | Krtap15        | 4             | 9               | 24               | 21             | 4              | 7                | 25                | 18              |
| 26561           | Mmp23          | 11            | 15              | 37               | 74             | 12             | 8                | 33                | 95              |
| 26562           | Ncdn           | 100           | 175             | 239              | 356            | 84             | 135              | 158               | 365             |
| 26563           | Ror1           | 8             | 3               | 32               | 26             | 7              | 3                | 27                | 24              |
| 26564           | Ror2           | 15            | 69              | 22               | 66             | 17             | 60               | 23                | 84              |
| 26565           | Pla2g10        | 11            | 3               | 33               | 212            | 8              | 3                | 31                | 117             |
| 26568           | Slc27a3        | 8             | 11              | 93               | 69             | 8              | 10               | 99                | 145             |
| 26569           | Slc27a4        | 45            | 44              | 50               | 212            | 44             | 37               | 43                | 213             |
| 26570           | Slc7a11        | 4             | 4               | 35               | 24             | 4              | 3                | 35                | 37              |
| 26572           | Cops3          | 101           | 218             | 1808             | 1251           | 99             | 223              | 1723              | 898             |
| 26611           | Rcn2           | 81            | 107             | 30               | 429            | 60             | 63               | 23                | 341             |
| 26754           | Cops5          | 37            | 1044            | 598              | 3805           | 41             | 996              | 583               | 3644            |
| 26757           | Dpysl4         | 15            | 2               | 38               | 75             | 16             | 3                | 35                | 18              |
| 26874           | Abcd2          | 4             | 4               | 35               | 31             | 4              | 4                | 36                | 48              |
| 26875           | Pclo           | 7             | 10              | 59               | 21             | 8              | 13               | 65                | 22              |
| 26876           | Adh4           | 5             | 5               | 21               | 61             | 5              | 3                | 18                | 43              |
| 26877           | B3galt1        | 5             | 9               | 26               | 20             | 5              | 11               | 27                | 19              |
| 26878           | B3galt2        | 6             | 2               | 24               | 24             | 7              | 3                | 23                | 26              |
| 26885           | Casp8ap2       | 40            | 314             | 18               | 3052           | 41             | 275              | 24                | 2275            |
| 26886           | Cenph          | 5             | 5               | 33               | 539            | 6              | 33               | 57                | 1934            |
| 26887           | Chst4          | 7             | 52              | 25               | 25             | 8              | 41               | 25                | 30              |
| 26889           | Cln8           | 17            | 128             | 109              | 358            | 10             | 11               | 34                | 67              |
| 26891           | Cops4          | 65            | 720             | 1559             | 852            | 74             | 867              | 1622              | 857             |
| 26893           | Cops6          | 112           | 1464            | 950              | 15507          | 116            | 1542             | 869               | 14617           |
| 26894           | Cops7a         | 129           | 1091            | 91               | 365            | 134            | 1168             | 83                | 380             |
| 26895           | Cops7b         | 32            | 82              | 164              | 466            | 40             | 121              | 221               | 435             |
| 26898           | Ctsj           | 5             | 2               | 27               | 36             | 5              | 3                | 30                | 31              |
| 26900           | Ddx3y          | 201           | 550             | 39               | 2338           | 168            | 394              | 33                | 2121            |
| 26901           | Deb1           | 16            | 910             | 568              | 1801           | 17             | 783              | 487               | 2109            |

| NCBI<br>Gene ID | Gene<br>Symbol | Affy.<br>CD4+ | Agilent<br>CD4+ | Illumina<br>CD4+ | Nimbl.<br>CD4+ | Affy.<br>CD19+ | Agilent<br>CD19+ | Illumina<br>CD19+ | Nimbl.<br>CD19+ |
|-----------------|----------------|---------------|-----------------|------------------|----------------|----------------|------------------|-------------------|-----------------|
| 26903           | Dysf           | 9             | 18              | 29               | 29             | 9              | 18               | 32                | 24              |
| 26908           | Eif2s3y        | 113           | 605             | 674              | 4494           | 122            | 566              | 717               | 4644            |
| 26909           | Exo1           | 7             | 8               | 25               | 184            | 10             | 64               | 31                | 483             |
| 26910           | Figla          | 6             | 3               | 20               | 40             | 6              | 3                | 23                | 55              |
| 26912           | Gcat           | 16            | 130             | 172              | 107            | 14             | 34               | 45                | 70              |
| 26913           | Gprin1         | 8             | 13              | 26               | 96             | 7              | 12               | 22                | 89              |
| 26914           | H2afy          | 269           | 1141            | 2870             | 4856           | 274            | 1022             | 2819              | 3312            |
| 26918           | Ern2           | 11            | 14              | 27               | 27             | 11             | 13               | 36                | 30              |
| 26919           | Zfp346         | 35            | 149             | 260              | 390            | 36             | 113              | 267               | 307             |
| 26921           | Map4k4         | 294           | 443             | 124              | 1083           | 179            | 212              | 67                | 487             |
| 26927           | Foxl2          | 19            | 32              | 23               | 69             | 16             | 25               | 28                | 77              |
| 26931           | Ppp2r5c        | 223           | 1099            | 47               | 8854           | 153            | 577              | 47                | 5977            |
| 26932           | Ppp2r5e        | 107           | 180             | 844              | 3096           | 94             | 151              | 673               | 2477            |
| 26934           | Racgap1        | 19            | 15              | 25               | 167            | 25             | 34               | 24                | 205             |
| 26936           | Aa536749       | 77            | 772             | 263              | 6261           | 96             | 831              | 284               | 7426            |
| 26939           | Polr3e         | 80            | 143             | 161              | 3346           | 78             | 125              | 139               | 3343            |
| 26941           | Slc9a3r1       | 366           | 1368            | 1666             | 513            | 172            | 470              | 605               | 246             |
| 26942           | Spag1          | 8             | 42              | 134              | 195            | 9              | 40               | 107               | 93              |
| 26944           | Tinag          | 5             | 2               | 35               | 25             | 5              | 3                | 32                | 34              |
| 26945           | Tpsg1          | 7             | 2               | 35               | 39             | 6              | 3                | 33                | 51              |
| 26946           | Trpc7          | 6             | 3               | 31               | 37             | 7              | 3                | 26                | 42              |
| 26949           | Vat1           | 20            | 18              | 37               | 118            | 25             | 36               | 51                | 74              |
| 26950           | Vsnl1          | 6             | 3               | 31               | 23             | 5              | 4                | 34                | 24              |
| 26951           | Zw10           | 69            | 460             | 348              | 1445           | 61             | 411              | 277               | 1042            |
| 26961           | Rpl8           | 2016          | 57856           | 10115            | 32429          | 1531           | 49686            | 8476              | 31535           |
| 26965           | Cul1           | 127           | 115             | 589              | 1696           | 173            | 171              | 886               | 2431            |
| 26968           | Islr           | 8             | 10              | 51               | 43             | 10             | 15               | 41                | 56              |
| 26970           | Pla2g2e        | 15            | 4               | 26               | 39             | 14             | 3                | 24                | 54              |
| 26971           | Pla2g2f        | 7             | 25              | 39               | 28             | 7              | 23               | 36                | 28              |
| 26972           | Spo11          | 6             | 33              | 110              | 134            | 5              | 26               | 47                | 95              |
| 26992           | Brd7           | 141           | 1880            | 349              | 3114           | 154            | 2040             | 355               | 3257            |
| 27007           | Klrk1          | 5             | 3               | 43               | 44             | 5              | 3                | 35                | 36              |
| 27015           | Polk           | 35            | 51              | 185              | 2556           | 36             | 58               | 197               | 2473            |
| 27029           | Sgsh           | 70            | 538             | 171              | 150            | 59             | 494              | 139               | 174             |
| 27045           | Nit1           | 90            | 470             | 708              | 1363           | 80             | 425              | 598               | 936             |
| 27047           | Omd            | 4             | 2               | 22               | 43             | 4              | 3                | 18                | 60              |
| 27049           | Etv3           | 165           | 76              | 314              | 1483           | 147            | 49               | 246               | 1197            |
| 27050           | Rps3           | 1614          | 76867           | 13678            | 35016          | 1282           | 86945            | 11242             | 32114           |
| 27052           | Aoah           | 5             | 13              | 24               | 179            | 5              | 9                | 25                | 14              |
| 27053           | Asns           | 6             | 28              | 37               | 119            | 6              | 69               | 30                | 204             |
| 27054           | Sec23b         | 118           | 455             | 112              | 4417           | 131            | 403              | 113               | 4046            |
| 27055           | Fkbp9          | 9             | 2               | 22               | 30             | 8              | 3                | 22                | 32              |
| 27056           | Irf5           | 21            | 21              | 42               | 28             | 337            | 1162             | 1214              | 972             |
| 27057           | Ncoa4          | 103           | 566             | 43               | 2514           | 118            | 541              | 52                | 2504            |
| 27058           | Srp9           | 37            | 3880            | 564              | 8907           | 28             | 3700             | 498               | 6614            |
| 27059           | Sh3d19         | 11            | 7               | 63               | 57             | 11             | 5                | 53                | 29              |
| 27060           | Tcirg1         | 69            | 155             | 196              | 833            | 157            | 365              | 364               | 1456            |
| 27061           | Bcap31         | 165           | 1459            | 128              | 13399          | 216            | 1654             | 135               | 11263           |
| 27062           | Cadps          | 5             | 3               | 25               | 29             | 6              | 4                | 20                | 33              |
| 27078           | Eppb9          | 7             | 6               | 21               | 50             | 8              | 22               | 33                | 62              |
| 27081           | Zfp275         | 65            | 156             | 176              | 471            | 52             | 125              | 147               | 220             |

| NCBI<br>Gene ID | Gene<br>Symbol | Affy.<br>CD4+ | Agilent<br>CD4+ | Illumina<br>CD4+ | Nimbl.<br>CD4+ | Affy.<br>CD19+ | Agilent<br>CD19+ | Illumina<br>CD19+ | Nimbl.<br>CD19+ |
|-----------------|----------------|---------------|-----------------|------------------|----------------|----------------|------------------|-------------------|-----------------|
| 27096           | Trappc3        | 142           | 213             | 713              | 4860           | 157            | 225              | 724               | 4625            |
| 27103           | Eif2ak4        | 31            | 54              | 30               | 1166           | 82             | 146              | 27                | 2680            |
| 27140           | Tlx3           | 15            | 2               | 28               | 162            | 16             | 3                | 26                | 264             |
| 27176           | Rpl7a          | 1038          | 74011           | 5576             | 33638          | 950            | 99649            | 4537              | 31298           |
| 27204           | Syn3           | 10            | 39              | 29               | 50             | 11             | 35               | 33                | 47              |
| 27205           | Podxl          | 12            | 10              | 35               | 45             | 12             | 10               | 31                | 43              |
| 27206           | Nrk            | 5             | 2               | 23               | 19             | 5              | 3                | 23                | 24              |
| 27207           | Rps11          | 1425          | 71444           | 17078            | 35661          | 1265           | 75392            | 14654             | 37830           |
| 27215           | Azi2           | 93            | 389             | 562              | 4289           | 54             | 175              | 335               | 2495            |
| 27216           | Olfr154        | 4             | 15              | 26               | 14             | 4              | 15               | 25                | 14              |
| 27217           | Mixl1          | 7             | 5               | 23               | 164            | 8              | 5                | 25                | 110             |
| 27218           | Slamf1         | 44            | 91              | 143              | 632            | 75             | 238              | 335               | 1373            |
| 27219           | Sgk2           | 7             | 13              | 23               | 29             | 6              | 12               | 22                | 39              |
| 27221           | Chaf1a         | 17            | 12              | 30               | 204            | 17             | 57               | 55                | 371             |
| 27223           | Trp53bp1       | 100           | 276             | 759              | 994            | 113            | 336              | 816               | 1023            |
| 27224           | Tceb3          | 46            | 395             | 101              | 633            | 55             | 406              | 100               | 705             |
| 27225           | Ddx24          | 151           | 654             | 627              | 3784           | 153            | 576              | 594               | 3431            |
| 27226           | Pla2g7         | 6             | 11              | 24               | 66             | 8              | 16               | 31                | 121             |
| 27260           | Plek2          | 6             | 3               | 33               | 48             | 6              | 3                | 32                | 56              |
| 27261           | Dok3           | 22            | 56              | 237              | 132            | 370            | 3125             | 6344              | 781             |
| 27267           | Cars           | 77            | 349             | 222              | 409            | 74             | 423              | 227               | 387             |
| 27273           | Pdk4           | 4             | 6               | 38               | 23             | 5              | 5                | 39                | 36              |
| 27274           | Zfp354b        | 5             | 2               | 17               | 22             | 6              | 3                | 18                | 131             |
| 27275           | Nufip1         | 52            | 886             | 29               | 2922           | 47             | 903              | 31                | 2844            |
| 27276           | Plekhb1        | 11            | 21              | 20               | 39             | 10             | 32               | 20                | 29              |
| 27277           | Golga5         | 36            | 469             | 348              | 8151           | 46             | 481              | 368               | 6507            |
| 27278           | Clnk           | 5             | 65              | 29               | 19             | 5              | 63               | 26                | 18              |
| 27279           | Tnfrsf12a      | 38            | 85              | 70               | 119            | 34             | 45               | 56                | 59              |
| 27280           | Phlda3         | 12            | 39              | 31               | 105            | 13             | 22               | 27                | 106             |
| 27281           | Hrasls         | 7             | 19              | 20               | 36             | 5              | 22               | 21                | 46              |
| 27354           | Nbn            | 58            | 445             | 259              | 1386           | 49             | 324              | 179               | 1118            |
| 27356           | Insl6          | 7             | 224             | 200              | 774            | 7              | 174              | 144               | 688             |
| 27358           | Defb3          | 5             | 123             | 24               | 51             | 5              | 100              | 29                | 53              |
| 27359           | Sytl4          | 7             | 3               | 30               | 55             | 7              | 3                | 35                | 31              |
| 27360           | Add3           | 564           | 2070            | 1322             | 4390           | 505            | 1874             | 1221              | 3691            |
| 27361           | Sepx1          | 62            | 664             | 229              | 448            | 61             | 693              | 192               | 418             |
| 27362           | Dnajb9         | 198           | 197             | 139              | 2620           | 229            | 140              | 189               | 3142            |
| 27364           | Srr            | 19            | 41              | 10176            | 701            | 17             | 44               | 11379             | 634             |
| 27366           | Txn14          | 116           | 2929            | 508              | 2557           | 105            | 2197             | 428               | 1966            |
| 27367           | Rpl3           | 1264          | 17054           | 15128            | 19528          | 1170           | 12979            | 13361             | 16050           |
| 27368           | Tbl2           | 38            | 62              | 191              | 464            | 37             | 60               | 168               | 348             |
| 27369           | Dguok          | 67            | 1215            | 626              | 3285           | 73             | 1351             | 650               | 3312            |
| 27370           | Rps26          | 3103          | 8265            | 14824            | 31217          | 3113           | 9010             | 13519             | 32910           |
| 27371           | Sh2d2a         | 200           | 41              | 1990             | 1976           | 57             | 37               | 646               | 514             |
| 27373           | Csnk1e         | 66            | 590             | 407              | 2525           | 46             | 240              | 236               | 1689            |
| 27375           | Tjp3           | 24            | 53              | 75               | 157            | 30             | 152              | 153               | 301             |
| 27376           | Slc25a10       | 32            | 69              | 51               | 239            | 35             | 114              | 62                | 393             |
| 27377           | Yme1l1         | 298           | 226             | 168              | 2935           | 278            | 182              | 164               | 3080            |
| 27378           | Tcl1b3         | 4             | 84              | 32               | 25             | 4              | 80               | 31                | 31              |
| 27379           | Tcl1b1         | 10            | 6617            | 21               | 29             | 12             | 16               | 20                | 37              |
| 27380           | Tcl1b4         | 13            | 71              | 18               | 22             | 13             | 59               | 18                | 20              |

| NCBI Gene ID | Gene Symbol | Affy. CD4+ | Agilent CD4+ | Illumina CD4+ | Nimbl. CD4+ | Affy. CD19+ | Agilent CD19+ | Illumina CD19+ | Nimbl. CD19+ |
|--------------|-------------|------------|--------------|---------------|-------------|-------------|---------------|----------------|--------------|
| 27381        | Tcl1b2      | 5          | 66           | 21            | 19          | 4           | 68            | 19             | 17           |
| 27382        | Tcl1b5      | 15         | 8            | 27            | 21          | 15          | 8             | 29             | 20           |
| 27386        | Npas3       | 4          | 6            | 30            | 48          | 4           | 6             | 25             | 55           |
| 27387        | Sh2d3c      | 131        | 760          | 83            | 887         | 121         | 665           | 72             | 866          |
| 27388        | Ptdss2      | 38         | 44           | 79            | 542         | 34          | 43            | 83             | 489          |
| 27389        | Dusp13      | 10         | 2            | 30            | 120         | 9           | 3             | 34             | 68           |
| 27392        | Pign        | 55         | 43           | 35            | 31          | 68          | 60            | 39             | 35           |
| 27393        | Mrpl39      | 194        | 423          | 89            | 8776        | 217         | 443           | 94             | 8309         |
| 27397        | Mrpl17      | 65         | 327          | 1237          | 39          | 77          | 420           | 1506           | 41           |
| 27399        | Ihpk1       | 130        | 1369         | 950           | 996         | 124         | 1278          | 739            | 696          |
| 27401        | Skp2        | 22         | 14           | 56            | 676         | 22          | 12            | 62             | 883          |
| 27402        | Pdhx        | 16         | 138          | 26            | 1753        | 17          | 137           | 25             | 1687         |
| 27403        | Abca7       | 135        | 5864         | 1270          | 874         | 95          | 4132          | 779            | 647          |
| 27404        | Abca8b      | 6          | 4            | 29            | 57          | 6           | 10            | 31             | 52           |
| 27405        | Abcg3       | 65         | 33           | 27            | 2968        | 34          | 25            | 30             | 1377         |
| 27406        | Abcf3       | 75         | 274          | 420           | 2128        | 65          | 262           | 446            | 2086         |
| 27407        | Abcf2       | 121        | 351          | 833           | 861         | 105         | 279           | 616            | 566          |
| 27409        | Abcg5       | 7          | 17           | 30            | 44          | 7           | 12            | 28             | 69           |
| 27410        | Abca3       | 94         | 133          | 1168          | 1081        | 94          | 129           | 1160           | 1306         |
| 27411        | Slc14a2     | 10         | 429          | 26            | 48          | 10          | 630           | 29             | 46           |
| 27412        | Peg12       | 20         | 37           | 20            | 216         | 20          | 25            | 21             | 239          |
| 27413        | Abcb11      | 5          | 33           | 33            | 124         | 5           | 19            | 27             | 30           |
| 27416        | Abcc5       | 45         | 390          | 270           | 699         | 27          | 160           | 168            | 337          |
| 27418        | Mkln1       | 120        | 210          | 687           | 523         | 113         | 184           | 661            | 393          |
| 27419        | Naglu       | 28         | 146          | 258           | 222         | 38          | 257           | 426            | 419          |
| 27421        | Abcc6       | 14         | 6            | 22            | 53          | 14          | 7             | 30             | 59           |
| 27425        | Atp5l       | 151        | 2011         | 4425          | 7641        | 137         | 2829          | 4589           | 8753         |
| 27426        | Nagpa       | 44         | 393          | 133           | 316         | 44          | 325           | 104            | 319          |
| 27493        | D0kist2     | 4          | 2            | 22            | 15          | 4           | 2             | 22             | 14           |
| 27494        | Amot        | 5          | 13           | 33            | 40          | 5           | 20            | 29             | 43           |
| 27528        | D0h4s114    | 8          | 2            | 35            | 18          | 6           | 3             | 33             | 22           |
| 27632        | Rdbp        | 19         | 337          | 396           | 731         | 26          | 466           | 536            | 1258         |
| 27643        | Ubl4        | 111        | 860          | 426           | 5663        | 82          | 639           | 284            | 3973         |
| 27756        | Lsm2        | 33         | 39           | 182           | 213         | 28          | 35            | 138            | 218          |
| 27762        | D17h6s56e   | 15         | 2            | 27            | 23          | 14          | 2             | 28             | 30           |
| 27784        | Commdb      | 98         | 274          | 166           | 1021        | 75          | 245           | 120            | 735          |
| 27801        | Zdhhc8      | 68         | 192          | 1093          | 148         | 58          | 155           | 804            | 106          |
| 27886        | Es2el       | 76         | 384          | 344           | 1524        | 66          | 383           | 306            | 1102         |
| 27965        | Spg21       | 82         | 170          | 639           | 650         | 90          | 190           | 643            | 616          |
| 27967        | Cherp       | 147        | 1377         | 660           | 1589        | 145         | 1298          | 592            | 1661         |
| 27973        | Vkorc1      | 38         | 617          | 449           | 1163        | 33          | 540           | 360            | 980          |
| 27984        | Efhd2       | 88         | 643          | 30            | 504         | 66          | 549           | 30             | 473          |
| 27998        | Exosc5      | 62         | 1936         | 327           | 1540        | 73          | 2344          | 296            | 1614         |
| 27999        | D6wsu176e   | 193        | 883          | 1208          | 1760        | 190         | 1069          | 1294           | 1353         |
| 28010        | D4wsu114e   | 77         | 1385         | 266           | 383         | 68          | 1362          | 232            | 311          |
| 28015        | Grinl1a     | 169        | 2467         | 18            | 6756        | 185         | 2395          | 19             | 6373         |
| 28019        | Ing4        | 81         | 1394         | 410           | 4441        | 95          | 1529          | 452            | 5429         |
| 28028        | Mrpl50      | 23         | 338          | 490           | 4485        | 24          | 403           | 531            | 4070         |
| 28035        | Usp39       | 101        | 125          | 897           | 1040        | 125         | 125           | 993            | 1003         |
| 28042        | D5wsu178e   | 76         | 157          | 106           | 732         | 65          | 89            | 99             | 428          |
| 28071        | Twistnb     | 87         | 468          | 598           | 4215        | 78          | 176           | 579            | 1081         |

| NCBI Gene ID | Gene Symbol | Affy. CD4+ | Agilent CD4+ | Illumina CD4+ | Nimbl. CD4+ | Affy. CD19+ | Agilent CD19+ | Illumina CD19+ | Nimbl. CD19+ |
|--------------|-------------|------------|--------------|---------------|-------------|-------------|---------------|----------------|--------------|
| 28080        | Atp5o       | 151        | 4522         | 2765          | 12577       | 147         | 3948          | 2544           | 11762        |
| 28081        | D11wsu99e   | 77         | 1991         | 733           | 3820        | 71          | 1959          | 749            | 4041         |
| 28105        | Trim36      | 12         | 14           | 44            | 191         | 12          | 24            | 37             | 320          |
| 28106        | D17wsu104e  | 26         | 177          | 236           | 2488        | 27          | 201           | 192            | 2334         |
| 28113        | Tinf2       | 65         | 209          | 31            | 2449        | 62          | 245           | 26             | 2732         |
| 28114        | Nsun2       | 125        | 1372         | 67            | 7972        | 123         | 1420          | 57             | 6939         |
| 28146        | D3ucla1     | 299        | 1122         | 23            | 578         | 1481        | 6834          | 31             | 2507         |
| 28169        | Agpat3      | 164        | 933          | 242           | 195         | 146         | 1023          | 159            | 147          |
| 28185        | Tomm70a     | 135        | 1088         | 190           | 872         | 138         | 908           | 208            | 789          |
| 28199        | Wdr23       | 79         | 2059         | 361           | 4718        | 73          | 1709          | 350            | 4918         |
| 28200        | Dhrs4       | 35         | 55           | 74            | 3187        | 36          | 56            | 58             | 2367         |
| 28240        | Trpm2       | 8          | 2            | 29            | 48          | 10          | 10            | 30             | 120          |
| 28248        | Slco1a1     | 4          | 2            | 29            | 19          | 4           | 3             | 25             | 17           |
| 28250        | Slco1a4     | 4          | 18           | 22            | 24          | 4           | 14            | 23             | 22           |
| 28253        | Slco1b2     | 5          | 14           | 23            | 37          | 5           | 9             | 23             | 35           |
| 28254        | Slco1a6     | 4          | 2            | 18            | 19          | 5           | 3             | 21             | 23           |
| 28295        | D10jhu81e   | 73         | 745          | 1288          | 267         | 64          | 702           | 1191           | 254          |
| 29805        | Znhit2      | 46         | 603          | 331           | 548         | 43          | 630           | 299            | 528          |
| 29806        | Limd1       | 114        | 904          | 709           | 3585        | 214         | 1807          | 1456           | 6225         |
| 29807        | Tpk1        | 13         | 11           | 43            | 441         | 19          | 29            | 59             | 590          |
| 29808        | Mga         | 150        | 251          | 104           | 1446        | 174         | 287           | 100            | 1574         |
| 29809        | Rabgap1l    | 74         | 527          | 112           | 4262        | 105         | 651           | 158            | 5159         |
| 29810        | Bag3        | 16         | 71           | 153           | 371         | 10          | 17            | 32             | 81           |
| 29811        | Ndrp2       | 38         | 185          | 284           | 1187        | 9           | 9             | 30             | 28           |
| 29812        | Ndrp3       | 218        | 955          | 546           | 2195        | 78          | 275           | 162            | 752          |
| 29813        | Zfp385      | 18         | 320          | 42            | 51          | 31          | 361           | 57             | 142          |
| 29815        | Bcar3       | 10         | 5            | 24            | 159         | 335         | 1393          | 173            | 2624         |
| 29816        | Hip1r       | 29         | 19           | 166           | 81          | 213         | 305           | 2499           | 992          |
| 29817        | Igfbp7      | 13         | 4            | 35            | 71          | 13          | 4             | 33             | 63           |
| 29818        | Hspb7       | 10         | 15           | 28            | 83          | 9           | 12            | 30             | 103          |
| 29819        | Stau2       | 7          | 2            | 27            | 25          | 11          | 16            | 93             | 97           |
| 29820        | Tnfrsf19    | 12         | 18           | 47            | 28          | 13          | 44            | 63             | 30           |
| 29845        | Olfr155     | 5          | 2            | 19            | 37          | 6           | 3             | 18             | 34           |
| 29846        | Olfr156     | 4          | 2            | 25            | 35          | 4           | 3             | 22             | 30           |
| 29849        | Olfr159     | 7          | 36           | 31            | 77          | 6           | 30            | 35             | 92           |
| 29856        | Smtn        | 14         | 8            | 30            | 111         | 15          | 13            | 36             | 113          |
| 29857        | Mapk12      | 20         | 69           | 68            | 174         | 23          | 121           | 87             | 367          |
| 29858        | Pmm1        | 21         | 369          | 69            | 1547        | 21          | 641           | 76             | 2047         |
| 29859        | Sult4a1     | 5          | 32           | 27            | 34          | 6           | 34            | 26             | 40           |
| 29861        | Neud4       | 21         | 63           | 30            | 42          | 20          | 56            | 30             | 63           |
| 29862        | Ninj2       | 9          | 32           | 25            | 75          | 10          | 43            | 22             | 37           |
| 29863        | Pde7b       | 6          | 2            | 26            | 37          | 6           | 5             | 25             | 34           |
| 29864        | Rnf11       | 47         | 43           | 168           | 553         | 53          | 56            | 174            | 451          |
| 29865        | Cabp5       | 5          | 2            | 33            | 19          | 6           | 4             | 33             | 20           |
| 29866        | Cabp2       | 13         | 12           | 22            | 74          | 11          | 12            | 23             | 109          |
| 29867        | Cabp1       | 7          | 4            | 36            | 116         | 6           | 5             | 30             | 164          |
| 29869        | Ulk2        | 74         | 181          | 200           | 1435        | 79          | 135           | 221            | 1704         |
| 29870        | Gtse1       | 12         | 3            | 33            | 57          | 13          | 3             | 35             | 85           |
| 29871        | Scmh1       | 36         | 35           | 74            | 421         | 50          | 31            | 90             | 789          |
| 29873        | Cspg5       | 13         | 53           | 49            | 77          | 12          | 58            | 44             | 39           |
| 29875        | Iqgap1      | 384        | 699          | 1173          | 12871       | 777         | 1052          | 2196           | 19803        |



| NCBI<br>Gene ID | Gene<br>Symbol | Affy.<br>CD4+ | Agilent<br>CD4+ | Illumina<br>CD4+ | Nimbl.<br>CD4+ | Affy.<br>CD19+ | Agilent<br>CD19+ | Illumina<br>CD19+ | Nimbl.<br>CD19+ |
|-----------------|----------------|---------------|-----------------|------------------|----------------|----------------|------------------|-------------------|-----------------|
| 29876           | Clic4          | 50            | 68              | 388              | 2972           | 182            | 237              | 1544              | 11153           |
| 29877           | Hdgfrp3        | 17            | 10              | 46               | 4002           | 13             | 3                | 75                | 799             |
| 30044           | Opn4           | 9             | 3               | 27               | 43             | 10             | 3                | 26                | 36              |
| 30045           | Dnajc12        | 19            | 78              | 49               | 150            | 17             | 75               | 46                | 111             |
| 30050           | Fbxw2          | 156           | 275             | 132              | 5966           | 139            | 256              | 123               | 5258            |
| 30051           | Spdef          | 20            | 5               | 24               | 44             | 19             | 3                | 23                | 36              |
| 30052           | Pcsk1n         | 25            | 200             | 45               | 94             | 22             | 220              | 42                | 67              |
| 30054           | Rnf17          | 5             | 4               | 26               | 46             | 4              | 6                | 21                | 30              |
| 30056           | Timm9          | 24            | 196             | 45               | 5154           | 22             | 210              | 42                | 6040            |
| 30057           | Timm8b         | 33            | 687             | 547              | 4508           | 36             | 802              | 687               | 6801            |
| 30059           | Timm10         | 22            | 993             | 1198             | 1996           | 25             | 1605             | 1129              | 3168            |
| 30060           | Mfi2           | 10            | 10              | 33               | 26             | 11             | 11               | 31                | 27              |
| 30785           | Cttnbp2        | 9             | 2               | 16               | 50             | 9              | 3                | 20                | 50              |
| 30791           | Slc39a1        | 59            | 267             | 224              | 38             | 76             | 453              | 302               | 55              |
| 30794           | Pdlim4         | 47            | 2669            | 1440             | 431            | 16             | 83               | 31                | 46              |
| 30795           | Fkbp3          | 154           | 3282            | 30               | 2321           | 117            | 2410             | 26                | 1804            |
| 30800           | Mmp20          | 6             | 2               | 24               | 17             | 6              | 3                | 25                | 22              |
| 30805           | Slc22a4        | 10            | 4               | 29               | 35             | 9              | 3                | 28                | 38              |
| 30806           | Adamts8        | 9             | 3               | 34               | 26             | 7              | 4                | 38                | 24              |
| 30838           | Fbxw4          | 129           | 769             | 89               | 855            | 96             | 486              | 53                | 345             |
| 30839           | Fbxw5          | 115           | 172             | 195              | 212            | 153            | 215              | 36                | 227             |
| 30840           | Fbxl6          | 54            | 233             | 249              | 327            | 57             | 203              | 205               | 270             |
| 30841           | Fbxl10         | 60            | 219             | 207              | 1684           | 58             | 295              | 380               | 2265            |
| 30843           | Fbxl12         | 88            | 395             | 400              | 979            | 80             | 321              | 387               | 949             |
| 30853           | Mlf2           | 179           | 225             | 299              | 170            | 167            | 245              | 246               | 219             |
| 30878           | Apln           | 17            | 118             | 22               | 59             | 17             | 120              | 17                | 67              |
| 30923           | Foxe3          | 19            | 16              | 35               | 90             | 18             | 17               | 31                | 124             |
| 30924           | Angptl3        | 5             | 2               | 25               | 18             | 4              | 5                | 24                | 20              |
| 30925           | Slamf6         | 170           | 585             | 487              | 5618           | 202            | 729              | 592               | 8521            |
| 30926           | Txn12          | 23            | 1257            | 391              | 3352           | 22             | 1024             | 406               | 3118            |
| 30927           | Snai3          | 12            | 8               | 160              | 152            | 12             | 7                | 104               | 59              |
| 30928           | Zfp238         | 59            | 675             | 518              | 363            | 168            | 1524             | 1205              | 1147            |
| 30932           | Zfp330         | 154           | 1448            | 351              | 3467           | 152            | 1425             | 327               | 2846            |
| 30933           | Tor2a          | 68            | 398             | 225              | 1077           | 68             | 452              | 192               | 1056            |
| 30934           | Tor1b          | 75            | 481             | 629              | 6044           | 70             | 506              | 601               | 4640            |
| 30935           | Tor3a          | 25            | 173             | 99               | 201            | 81             | 929              | 473               | 897             |
| 30937           | Lmcd1          | 9             | 2               | 73               | 33             | 9              | 3                | 71                | 47              |
| 30938           | Fgd3           | 138           | 123             | 52               | 94             | 136            | 117              | 53                | 80              |
| 30939           | Pttg1          | 62            | 1677            | 358              | 4411           | 51             | 1022             | 253               | 3042            |
| 30940           | Usp25          | 349           | 855             | 207              | 3638           | 278            | 534              | 160               | 2285            |
| 30941           | Usp21          | 121           | 172             | 236              | 1466           | 134            | 168              | 208               | 1207            |
| 30942           | Hnf4g          | 5             | 20              | 26               | 43             | 5              | 16               | 19                | 54              |
| 30945           | Rnf19          | 161           | 809             | 1662             | 7242           | 70             | 305              | 680               | 3126            |
| 30946           | Abt1           | 75            | 312             | 22               | 99             | 80             | 381              | 21                | 85              |
| 30947           | Adat1          | 24            | 461             | 54               | 256            | 27             | 347              | 52                | 271             |
| 30948           | Bin1           | 132           | 1482            | 49               | 944            | 258            | 3213             | 65                | 1548            |
| 30949           | Lcmt1          | 28            | 401             | 461              | 640            | 22             | 284              | 258               | 441             |
| 30951           | Cbx8           | 47            | 170             | 116              | 268            | 38             | 90               | 90                | 223             |
| 30952           | Cngb3          | 4             | 2               | 26               | 17             | 4              | 3                | 24                | 18              |
| 30953           | Schip1         | 10            | 2               | 22               | 62             | 10             | 5                | 20                | 54              |
| 30955           | Pik3cg         | 108           | 48              | 606              | 196            | 212            | 123              | 1286              | 301             |

| NCBI<br>Gene ID | Gene<br>Symbol | Affy.<br>CD4+ | Agilent<br>CD4+ | Illumina<br>CD4+ | Nimbl.<br>CD4+ | Affy.<br>CD19+ | Agilent<br>CD19+ | Illumina<br>CD19+ | Nimbl.<br>CD19+ |
|-----------------|----------------|---------------|-----------------|------------------|----------------|----------------|------------------|-------------------|-----------------|
| 30956           | Aass           | 5             | 42              | 36               | 37             | 5              | 35               | 32                | 51              |
| 30957           | Mapk8ip3       | 178           | 4420            | 58               | 263            | 166            | 4750             | 72                | 498             |
| 30959           | Ddx25          | 5             | 89              | 42               | 28             | 5              | 247              | 405               | 39              |
| 30960           | Vapa           | 200           | 2465            | 742              | 1031           | 194            | 2619             | 691               | 821             |
| 30962           | Slc7a9         | 6             | 20              | 24               | 28             | 7              | 21               | 29                | 25              |
| 30963           | Ptpla          | 6             | 38              | 32               | 92             | 7              | 28               | 32                | 91              |
| 50490           | Nox4           | 5             | 13              | 25               | 30             | 5              | 20               | 25                | 78              |
| 50492           | Thop1          | 13            | 21              | 69               | 38             | 13             | 28               | 83                | 54              |
| 50493           | Txnrd1         | 56            | 728             | 59               | 936            | 51             | 742              | 44                | 687             |
| 50496           | E2f6           | 35            | 224             | 329              | 1799           | 23             | 151              | 207               | 886             |
| 50497           | Hspa14         | 98            | 2342            | 27               | 5547           | 92             | 2050             | 24                | 4004            |
| 50498           | Ebi3           | 11            | 29              | 31               | 106            | 29             | 631              | 223               | 1753            |
| 50500           | Ttpa           | 5             | 6               | 25               | 22             | 5              | 3                | 22                | 24              |
| 50501           | Prok2          | 8             | 2               | 25               | 47             | 7              | 4                | 29                | 46              |
| 50505           | Erccl4         | 83            | 327             | 349              | 450            | 72             | 270              | 277               | 415             |
| 50518           | A              | 8             | 4               | 30               | 18             | 8              | 4                | 35                | 25              |
| 50523           | Lats2          | 98            | 473             | 31               | 4984           | 129            | 431              | 34                | 4934            |
| 50524           | Sall2          | 19            | 102             | 85               | 348            | 14             | 3                | 25                | 96              |
| 50525           | Spag6          | 7             | 3               | 31               | 34             | 7              | 4                | 26                | 24              |
| 50527           | Ero1l          | 78            | 71              | 36               | 429            | 62             | 49               | 41                | 174             |
| 50528           | Tmprss2        | 7             | 20              | 23               | 21             | 8              | 22               | 28                | 24              |
| 50529           | Mrps7          | 90            | 293             | 273              | 4206           | 106            | 515              | 379               | 6341            |
| 50530           | Mfap5          | 6             | 6               | 22               | 32             | 6              | 4                | 20                | 30              |
| 50540           | Igfbp1b        | 6             | 2               | 32               | 24             | 5              | 3                | 34                | 27              |
| 50701           | Ela2           | 11            | 2               | 30               | 19             | 11             | 3                | 27                | 20              |
| 50706           | Postn          | 4             | 3               | 34               | 57             | 5              | 4                | 29                | 58              |
| 50708           | Hist1h1c       | 93            | 217             | 536              | 2123           | 121            | 357              | 808               | 2460            |
| 50709           | Hist1h1e       | 17            | 148             | 28               | 75             | 28             | 269              | 30                | 93              |
| 50721           | Sirt6          | 44            | 26              | 47               | 155            | 40             | 15               | 39                | 179             |
| 50723           | Icosl          | 14            | 29              | 39               | 44             | 269            | 3047             | 113               | 912             |
| 50753           | Fbxo8          | 93            | 149             | 82               | 992            | 103            | 188              | 70                | 896             |
| 50754           | Fbxw7          | 33            | 167             | 355              | 99             | 41             | 174              | 363               | 104             |
| 50755           | Fbxo18         | 47            | 523             | 416              | 544            | 50             | 682              | 462               | 510             |
| 50759           | Fbxo16         | 6             | 9               | 38               | 59             | 6              | 13               | 38                | 50              |
| 50760           | Fbxo17         | 16            | 44              | 25               | 663            | 11             | 3                | 18                | 68              |
| 50764           | Fbxo15         | 4             | 2               | 25               | 15             | 4              | 3                | 25                | 16              |
| 50765           | Trfr2          | 8             | 2               | 28               | 77             | 8              | 6                | 31                | 148             |
| 50766           | Crim1          | 225           | 203             | 266              | 297            | 34             | 20               | 54                | 53              |
| 50768           | Dlc1           | 6             | 39              | 28               | 18             | 5              | 39               | 37                | 33              |
| 50769           | Atp8a2         | 8             | 17              | 42               | 42             | 7              | 5                | 35                | 22              |
| 50770           | Atp11a         | 85            | 269             | 31               | 3830           | 10             | 6                | 31                | 89              |
| 50771           | Atp9b          | 111           | 674             | 281              | 854            | 100            | 577              | 263               | 499             |
| 50772           | Mapk6          | 104           | 225             | 259              | 881            | 108            | 232              | 274               | 758             |
| 50773           | Nt5c           | 160           | 4150            | 2109             | 12370          | 136            | 3658             | 1856              | 10239           |
| 50774           | Krtap5-1       | 123           | 148             | 33               | 376            | 103            | 107              | 30                | 376             |
| 50775           | Krtap5-4       | 14            | 364             | 37               | 36             | 14             | 313              | 35                | 36              |
| 50776           | Polg2          | 53            | 267             | 286              | 128            | 34             | 199              | 227               | 77              |
| 50778           | Rgs1           | 13            | 146             | 192              | 715            | 9              | 11               | 36                | 99              |
| 50779           | Rgs6           | 5             | 2               | 30               | 127            | 5              | 3                | 29                | 164             |
| 50780           | Rgs3           | 82            | 617             | 90               | 1191           | 27             | 169              | 39                | 488             |
| 50781           | Dkk3           | 6             | 6               | 36               | 21             | 7              | 3                | 35                | 28              |

| NCBI<br>Gene ID | Gene<br>Symbol | Affy.<br>CD4+ | Agilent<br>CD4+ | Illumina<br>CD4+ | Nimbl.<br>CD4+ | Affy.<br>CD19+ | Agilent<br>CD19+ | Illumina<br>CD19+ | Nimbl.<br>CD19+ |
|-----------------|----------------|---------------|-----------------|------------------|----------------|----------------|------------------|-------------------|-----------------|
| 50782           | Rgs11          | 15            | 202             | 268              | 505            | 9              | 29               | 30                | 30              |
| 50783           | Lsm4           | 201           | 4246            | 571              | 5300           | 183            | 4195             | 464               | 5418            |
| 50784           | Ppap2c         | 15            | 13              | 65               | 1825           | 24             | 14               | 210               | 856             |
| 50785           | Hs6st1         | 76            | 439             | 98               | 241            | 83             | 474              | 102               | 272             |
| 50786           | Hs6st2         | 4             | 5               | 34               | 24             | 4              | 4                | 33                | 23              |
| 50787           | Hs6st3         | 13            | 55              | 24               | 40             | 14             | 50               | 23                | 50              |
| 50788           | Fbxl8          | 22            | 269             | 211              | 305            | 22             | 257              | 197               | 318             |
| 50790           | Acsl4          | 101           | 770             | 251              | 593            | 67             | 425              | 174               | 295             |
| 50793           | Orc3l          | 103           | 249             | 101              | 1640           | 120            | 280              | 108               | 2140            |
| 50794           | Klf13          | 224           | 3370            | 1977             | 194            | 124            | 1619             | 849               | 132             |
| 50795           | Sh3bgr         | 8             | 9               | 26               | 25             | 8              | 12               | 21                | 46              |
| 50796           | Dmrt1          | 8             | 2               | 31               | 98             | 8              | 3                | 34                | 67              |
| 50797           | Copb2          | 185           | 1072            | 2606             | 1276           | 204            | 1156             | 2816              | 1288            |
| 50798           | Gne            | 103           | 352             | 188              | 682            | 120            | 328              | 234               | 677             |
| 50799           | Slc25a13       | 13            | 23              | 28               | 85             | 12             | 21               | 27                | 168             |
| 50817           | Solh           | 70            | 350             | 252              | 99             | 77             | 366              | 233               | 121             |
| 50849           | Rnf10          | 207           | 580             | 121              | 544            | 173            | 452              | 95                | 381             |
| 50868           | Keap1          | 78            | 858             | 685              | 3531           | 71             | 595              | 603               | 3563            |
| 50873           | Park2          | 10            | 9               | 25               | 42             | 9              | 8                | 29                | 46              |
| 50874           | Tmod4          | 9             | 10              | 74               | 144            | 9              | 8                | 61                | 134             |
| 50875           | Tmod3          | 295           | 239             | 933              | 3893           | 533            | 457              | 1508              | 5222            |
| 50876           | Tmod2          | 7             | 26              | 27               | 26             | 7              | 36               | 28                | 34              |
| 50878           | Stag3          | 9             | 5               | 32               | 51             | 9              | 8                | 30                | 53              |
| 50880           | Scly           | 38            | 148             | 118              | 150            | 46             | 259              | 181               | 144             |
| 50883           | Chek2          | 12            | 13              | 41               | 494            | 28             | 52               | 53                | 1572            |
| 50884           | Nckap1         | 12            | 4               | 39               | 16             | 7              | 3                | 27                | 18              |
| 50887           | Nsbp1          | 13            | 233             | 221              | 3191           | 21             | 279              | 231               | 3295            |
| 50905           | Il17rb         | 14            | 20              | 51               | 166            | 11             | 5                | 27                | 43              |
| 50907           | Preb           | 177           | 1894            | 1098             | 2987           | 170            | 1606             | 938               | 2083            |
| 50908           | C1s            | 4             | 2               | 30               | 22             | 4              | 3                | 33                | 30              |
| 50909           | C1r            | 6             | 16              | 27               | 101            | 6              | 19               | 27                | 114             |
| 50911           | Exosc9         | 82            | 203             | 27               | 546            | 101            | 241              | 27                | 536             |
| 50912           | Exosc10        | 209           | 329             | 294              | 1047           | 242            | 323              | 296               | 1138            |
| 50913           | Olig2          | 6             | 6               | 24               | 48             | 6              | 9                | 27                | 77              |
| 50914           | Olig1          | 12            | 3               | 22               | 34             | 11             | 4                | 23                | 50              |
| 50915           | Grb14          | 9             | 2               | 41               | 37             | 8              | 3                | 33                | 23              |
| 50916           | Irx4           | 8             | 23              | 23               | 26             | 8              | 22               | 24                | 26              |
| 50917           | Galns          | 32            | 53              | 56               | 164            | 58             | 113              | 91                | 306             |
| 50918           | Myadm          | 9             | 3               | 37               | 28             | 70             | 47               | 528               | 436             |
| 50926           | Hnrpd1         | 273           | 836             | 2432             | 14298          | 240            | 570              | 2022              | 12020           |
| 50927           | Nasp           | 60            | 1610            | 503              | 3195           | 47             | 1542             | 401               | 1960            |
| 50928           | Klrg1          | 5             | 17              | 53               | 1322           | 5              | 3                | 36                | 127             |
| 50929           | Il22           | 6             | 2               | 26               | 19             | 6              | 3                | 23                | 21              |
| 50930           | Tnfsf14        | 7             | 43              | 29               | 136            | 6              | 14               | 32                | 97              |
| 50931           | Il27ra         | 338           | 1073            | 817              | 1956           | 126            | 392              | 278               | 727             |
| 50933           | Uchl3          | 102           | 371             | 33               | 5710           | 151            | 608              | 59                | 8029            |
| 50934           | Slc7a8         | 5             | 10              | 31               | 20             | 6              | 9                | 36                | 22              |
| 50996           | Pdcd7          | 54            | 209             | 182              | 349            | 56             | 259              | 206               | 309             |
| 50997           | Mpp2           | 8             | 50              | 21               | 33             | 9              | 59               | 22                | 79              |
| 51786           | Cpsf2          | 80            | 415             | 161              | 329            | 159            | 649              | 242               | 517             |
| 51788           | H2afz          | 316           | 3322            | 834              | 18825          | 244            | 2609             | 596               | 13511           |

| NCBI Gene ID | Gene Symbol | Affy. CD4+ | Agilent CD4+ | Illumina CD4+ | Nimbl. CD4+ | Affy. CD19+ | Agilent CD19+ | Illumina CD19+ | Nimbl. CD19+ |
|--------------|-------------|------------|--------------|---------------|-------------|-------------|---------------|----------------|--------------|
| 51789        | Tnk2        | 64         | 218          | 101           | 186         | 71          | 243           | 87             | 203          |
| 51791        | Rgs14       | 115        | 1588         | 710           | 812         | 85          | 1011          | 404            | 715          |
| 51792        | Ppp2r1a     | 258        | 282          | 410           | 725         | 275         | 287           | 396            | 499          |
| 51793        | Ddah2       | 10         | 48           | 80            | 207         | 10          | 109           | 112            | 398          |
| 51795        | Srpx        | 6          | 4            | 25            | 28          | 5           | 4             | 26             | 36           |
| 51796        | Srrm1       | 129        | 165          | 2045          | 3329        | 129         | 143           | 2191           | 4043         |
| 51797        | Ctps        | 30         | 533          | 373           | 883         | 27          | 753           | 384            | 922          |
| 51798        | Ech1        | 136        | 439          | 922           | 959         | 125         | 489           | 896            | 1067         |
| 51800        | Bok         | 31         | 2            | 41            | 54          | 30          | 3             | 44             | 82           |
| 51801        | Ramp1       | 57         | 471          | 612           | 3159        | 10          | 10            | 25             | 29           |
| 51810        | Hnrpu       | 861        | 9569         | 111           | 30307       | 859         | 9415          | 81             | 24622        |
| 51812        | Mcrs1       | 48         | 424          | 391           | 696         | 51          | 452           | 367            | 692          |
| 51813        | Ccnc        | 51         | 286          | 178           | 4425        | 52          | 295           | 192            | 3878         |
| 51885        | D2ertd435e  | 82         | 40           | 104           | 1411        | 86          | 46            | 105            | 1249         |
| 51886        | Fubp1       | 471        | 55           | 167           | 16613       | 436         | 44            | 148            | 16918        |
| 51902        | Rnf24       | 5          | 13           | 31            | 28          | 6           | 21            | 30             | 29           |
| 51944        | D2ertd750e  | 14         | 8            | 56            | 957         | 20          | 10            | 66             | 1378         |
| 52013        | D19ertd386e | 82         | 168          | 38            | 1188        | 77          | 154           | 42             | 1136         |
| 52023        | D14ertd581e | 25         | 76           | 88            | 525         | 27          | 83            | 113            | 601          |
| 52024        | Ankrd22     | 6          | 2            | 52            | 25          | 6           | 3             | 43             | 33           |
| 52028        | Bbs1        | 10         | 2            | 32            | 59          | 10          | 3             | 24             | 82           |
| 52033        | Pbk         | 7          | 6            | 26            | 75          | 8           | 19            | 30             | 140          |
| 52040        | Ppp1r10     | 172        | 625          | 1437          | 646         | 153         | 444           | 1221           | 490          |
| 52055        | Rab11fip5   | 7          | 101          | 29            | 36          | 7           | 100           | 39             | 51           |
| 52065        | Mfhas1      | 157        | 910          | 261           | 3091        | 80          | 364           | 120            | 1577         |
| 52150        | Kcnk6       | 10         | 8            | 51            | 61          | 10          | 39            | 116            | 183          |
| 52163        | Camk1       | 8          | 2            | 26            | 41          | 8           | 3             | 29             | 36           |
| 52174        | D4ertd196e  | 57         | 310          | 824           | 733         | 55          | 290           | 781            | 532          |
| 52187        | Rragd       | 8          | 96           | 34            | 147         | 6           | 120           | 26             | 171          |
| 52206        | Anapc4      | 110        | 1554         | 649           | 522         | 114         | 1296          | 571            | 555          |
| 52245        | Commd2      | 46         | 356          | 33            | 5287        | 47          | 347           | 33             | 5030         |
| 52276        | Cdca8       | 7          | 147          | 36            | 604         | 8           | 342           | 31             | 770          |
| 52323        | Klhl7       | 24         | 36           | 180           | 525         | 23          | 18            | 132            | 375          |
| 52377        | Rcn3        | 8          | 132          | 50            | 162         | 9           | 158           | 35             | 223          |
| 52389        | Gpr123      | 20         | 3            | 47            | 48          | 18          | 3             | 45             | 39           |
| 52428        | Rhpn2       | 6          | 2            | 25            | 50          | 6           | 3             | 29             | 115          |
| 52432        | Ppp2r2d     | 82         | 1121         | 517           | 2174        | 74          | 1046          | 443            | 2068         |
| 52440        | Tax1bp1     | 297        | 1261         | 1977          | 10858       | 383         | 1393          | 2291           | 12752        |
| 52443        | Mrpl48      | 67         | 297          | 308           | 8391        | 75          | 296           | 330            | 7618         |
| 52477        | Angel2      | 112        | 453          | 517           | 5222        | 124         | 432           | 545            | 6364         |
| 52502        | Carhsp1     | 36         | 62           | 88            | 1010        | 38          | 190           | 181            | 2694         |
| 52513        | Ddx56       | 83         | 352          | 39            | 854         | 85          | 372           | 38             | 675          |
| 52521        | Zfp622      | 74         | 793          | 24            | 3772        | 80          | 954           | 26             | 3991         |
| 52530        | Nola2       | 76         | 797          | 354           | 4936        | 81          | 1205          | 394            | 6516         |
| 52538        | Acaa2       | 119        | 1859         | 2121          | 2209        | 65          | 836           | 1005           | 1351         |
| 52551        | Sgta        | 70         | 633          | 46            | 139         | 72          | 664           | 45             | 133          |
| 52552        | Parp8       | 177        | 556          | 127           | 522         | 157         | 401           | 114            | 371          |
| 52563        | Cdc23       | 97         | 486          | 323           | 749         | 84          | 467           | 250            | 549          |
| 52575        | Rg9mtd1     | 66         | 195          | 390           | 281         | 61          | 172           | 371            | 183          |
| 52585        | Dhrs1       | 41         | 46           | 200           | 328         | 63          | 79            | 302            | 415          |
| 52589        | Ncald       | 14         | 46           | 32            | 32          | 13          | 41            | 28             | 41           |

| NCBI Gene ID | Gene Symbol | Affy. CD4+ | Agilent CD4+ | Illumina CD4+ | Nimbl. CD4+ | Affy. CD19+ | Agilent CD19+ | Illumina CD19+ | Nimbl. CD19+ |
|--------------|-------------|------------|--------------|---------------|-------------|-------------|---------------|----------------|--------------|
| 52592        | Brms1l      | 38         | 144          | 282           | 573         | 36          | 144           | 301            | 443          |
| 52609        | Cbx7        | 142        | 792          | 1593          | 1822        | 177         | 718           | 1748           | 1935         |
| 52633        | Nit2        | 36         | 127          | 121           | 5066        | 37          | 64            | 85             | 3363         |
| 52635        | 12ertd551   | 417        | 55           | 134           | 12583       | 123         | 8             | 67             | 3755         |
| 52665        | Echdc1      | 18         | 47           | 190           | 1350        | 16          | 46            | 202            | 1117         |
| 52666        | 10ertd610   | 6          | 30           | 38            | 73          | 6           | 29            | 34             | 83           |
| 52679        | E2f7        | 10         | 3            | 23            | 48          | 12          | 13            | 25             | 147          |
| 52686        | Mettl2      | 81         | 48           | 214           | 1723        | 77          | 46            | 210            | 1618         |
| 52696        | Zwint       | 83         | 754          | 652           | 9381        | 58          | 460           | 478            | 6346         |
| 52700        | Txn15       | 142        | 2471         | 27            | 2637        | 142         | 2382          | 27             | 2348         |
| 52710        | Gpr172b     | 52         | 424          | 178           | 1690        | 48          | 329           | 148            | 1258         |
| 52793        | Orf9        | 4          | 2            | 40            | 33          | 5           | 3             | 35             | 54           |
| 52815        | Ldhd        | 24         | 32           | 50            | 67          | 17          | 15            | 35             | 24           |
| 52830        | Pnrc2       | 281        | 1548         | 822           | 4645        | 374         | 1755          | 1209           | 5045         |
| 52850        | Rutbc2      | 7          | 2            | 30            | 36          | 8           | 4             | 33             | 25           |
| 52855        | Lair1       | 22         | 62           | 46            | 340         | 18          | 23            | 25             | 127          |
| 52856        | Gtpbp5      | 48         | 260          | 185           | 1438        | 35          | 223           | 146            | 843          |
| 52858        | Cdipt       | 237        | 3680         | 3130          | 5501        | 137         | 1645          | 1397           | 2298         |
| 52864        | Btbd12      | 59         | 756          | 994           | 545         | 59          | 651           | 966            | 417          |
| 52874        | 19bwg1357   | 117        | 462          | 2045          | 727         | 127         | 425           | 1738           | 740          |
| 52892        | Sco1        | 20         | 54           | 44            | 185         | 22          | 65            | 49             | 189          |
| 52897        | 11bwg0517   | 10         | 17           | 29            | 260         | 10          | 15            | 26             | 204          |
| 52898        | 11bwg0434   | 209        | 241          | 568           | 6864        | 186         | 202           | 455            | 5531         |
| 52906        | Ahi1        | 17         | 30           | 67            | 167         | 16          | 27            | 82             | 171          |
| 53311        | Mybph       | 20         | 20           | 27            | 52          | 20          | 13            | 27             | 43           |
| 53313        | Atp2a3      | 275        | 487          | 4175          | 1301        | 510         | 864           | 6528           | 2383         |
| 53314        | Batf        | 47         | 592          | 237           | 2349        | 36          | 332           | 114            | 1422         |
| 53315        | Sult1d1     | 4          | 10           | 24            | 22          | 4           | 9             | 27             | 24           |
| 53317        | Plrg1       | 150        | 543          | 1400          | 3114        | 149         | 421           | 1409           | 2572         |
| 53318        | Pdlim3      | 7          | 9            | 36            | 34          | 7           | 27            | 32             | 42           |
| 53319        | Nxf1        | 380        | 85           | 1288          | 4219        | 309         | 63            | 982            | 2501         |
| 53320        | Folh1       | 5          | 2            | 22            | 20          | 5           | 3             | 20             | 23           |
| 53321        | Cntnap1     | 6          | 76           | 27            | 34          | 6           | 65            | 30             | 35           |
| 53322        | Nucb2       | 10         | 15           | 24            | 215         | 45          | 229           | 24             | 1299         |
| 53323        | Hip2        | 193        | 1024         | 711           | 6701        | 160         | 936           | 629            | 6450         |
| 53324        | Nptx2       | 12         | 3            | 28            | 75          | 11          | 4             | 27             | 68           |
| 53325        | Banp        | 114        | 777          | 18            | 1426        | 131         | 671           | 21             | 1914         |
| 53328        | Pgrmc1      | 33         | 394          | 147           | 659         | 33          | 311           | 143            | 513          |
| 53330        | Vamp4       | 154        | 185          | 427           | 1901        | 156         | 179           | 453            | 1758         |
| 53331        | Stx7        | 31         | 192          | 194           | 2296        | 117         | 617           | 814            | 5714         |
| 53332        | Mtmr1       | 55         | 811          | 328           | 566         | 57          | 831           | 295            | 436          |
| 53333        | Tomm40      | 82         | 57           | 48            | 1413        | 78          | 79            | 47             | 1329         |
| 53334        | Gosr1       | 135        | 765          | 166           | 2179        | 124         | 436           | 113            | 1306         |
| 53357        | Pla2g6      | 30         | 122          | 51            | 87          | 29          | 110           | 54             | 77           |
| 53374        | Chst3       | 6          | 31           | 26            | 40          | 369         | 7176          | 1533           | 13361        |
| 53375        | Mtx2        | 34         | 478          | 46            | 929         | 38          | 489           | 45             | 828          |
| 53376        | Usp2        | 21         | 18           | 49            | 246         | 16          | 9             | 20             | 148          |
| 53378        | Sdcbp       | 213        | 2750         | 314           | 5246        | 191         | 2024          | 262            | 3927         |
| 53379        | Hnrpa2b1    | 592        | 4032         | 240           | 19376       | 663         | 4792          | 239            | 17337        |
| 53380        | Psm10       | 81         | 203          | 512           | 3454        | 88          | 201           | 471            | 2925         |
| 53381        | Prdx4       | 14         | 194          | 383           | 941         | 19          | 271           | 556            | 1115         |

| NCBI<br>Gene ID | Gene<br>Symbol | Affy.<br>CD4+ | Agilent<br>CD4+ | Illumina<br>CD4+ | Nimbl.<br>CD4+ | Affy.<br>CD19+ | Agilent<br>CD19+ | Illumina<br>CD19+ | Nimbl.<br>CD19+ |
|-----------------|----------------|---------------|-----------------|------------------|----------------|----------------|------------------|-------------------|-----------------|
| 53382           | Txn1           | 80            | 903             | 83               | 766            | 77             | 955              | 97                | 582             |
| 53404           | Atoh7          | 108           | 8               | 23               | 153            | 101            | 8                | 23                | 182             |
| 53412           | Ppp1r3c        | 5             | 2               | 29               | 17             | 5              | 3                | 32                | 17              |
| 53413           | Exoc7          | 60            | 133             | 939              | 552            | 58             | 115              | 1022              | 692             |
| 53414           | Bysl           | 37            | 605             | 25               | 1635           | 17             | 470              | 27                | 1062            |
| 53415           | Htatip2        | 42            | 213             | 487              | 3854           | 31             | 138              | 289               | 2394            |
| 53416           | Stk39          | 90            | 178             | 178              | 1251           | 9              | 13               | 33                | 21              |
| 53417           | Hif3a          | 6             | 116             | 87               | 272            | 7              | 106              | 79                | 235             |
| 53418           | B4galt2        | 8             | 10              | 41               | 66             | 9              | 14               | 33                | 53              |
| 53419           | Corin          | 8             | 4               | 22               | 53             | 9              | 4                | 24                | 33              |
| 53420           | Syt5           | 7             | 8               | 22               | 65             | 7              | 6                | 21                | 90              |
| 53421           | Sec61a1        | 302           | 2282            | 304              | 4157           | 252            | 1883             | 254               | 3633            |
| 53422           | Ybx2           | 13            | 213             | 38               | 74             | 12             | 186              | 45                | 95              |
| 53424           | Tsnax          | 101           | 305             | 1632             | 971            | 82             | 198              | 1317              | 681             |
| 53598           | Dctn3          | 57            | 2397            | 338              | 11601          | 55             | 2221             | 284               | 11058           |
| 53599           | Cd164          | 441           | 3896            | 3854             | 18895          | 369            | 2250             | 3357              | 14409           |
| 53600           | Timm23         | 172           | 1476            | 21               | 2027           | 151            | 1158             | 24                | 1490            |
| 53601           | Pcdh12         | 9             | 7               | 25               | 40             | 9              | 5                | 23                | 32              |
| 53602           | Hpcal1         | 151           | 782             | 102              | 8051           | 31             | 77               | 22                | 2539            |
| 53603           | Tslp           | 4             | 2               | 24               | 28             | 4              | 3                | 23                | 43              |
| 53604           | Zpbp           | 11            | 13              | 61               | 190            | 8              | 10               | 61                | 116             |
| 53605           | Nap1l1         | 115           | 241             | 791              | 6976           | 208            | 480              | 1542              | 10136           |
| 53607           | Snrpa          | 118           | 1060            | 230              | 281            | 141            | 1274             | 265               | 315             |
| 53608           | Map3k6         | 7             | 10              | 19               | 65             | 6              | 8                | 23                | 55              |
| 53609           | Sfrs16         | 81            | 4533            | 879              | 348            | 84             | 4584             | 802               | 242             |
| 53610           | Nono           | 450           | 4737            | 91               | 22299          | 433            | 4714             | 79                | 19778           |
| 53611           | Vti1a          | 37            | 72              | 84               | 540            | 31             | 92               | 95                | 511             |
| 53612           | Vti1b          | 79            | 1287            | 596              | 9488           | 88             | 1299             | 518               | 7891            |
| 53614           | Reck           | 8             | 19              | 49               | 39             | 6              | 6                | 22                | 21              |
| 53618           | Fut8           | 41            | 28              | 75               | 2400           | 33             | 24               | 65                | 2198            |
| 53619           | Blcap          | 34            | 467             | 200              | 36             | 34             | 569              | 211               | 36              |
| 53620           | Vamp5          | 29            | 184             | 73               | 1217           | 32             | 212              | 88                | 1584            |
| 53621           | Cnot4          | 151           | 218             | 553              | 3465           | 146            | 253              | 500               | 3067            |
| 53623           | Gria3          | 5             | 4               | 34               | 18             | 5              | 7                | 37                | 24              |
| 53624           | Cldn7          | 6             | 21              | 21               | 43             | 6              | 16               | 17                | 36              |
| 53626           | Insm1          | 11            | 3               | 25               | 27             | 10             | 3                | 26                | 22              |
| 53627           | Porcn          | 8             | 22              | 24               | 49             | 8              | 18               | 25                | 22              |
| 53761           | Bat2           | 190           | 76              | 256              | 386            | 215            | 115              | 255               | 473             |
| 53814           | Oaz3           | 5             | 9               | 24               | 113            | 5              | 14               | 28                | 37              |
| 53817           | Bat1a          | 579           | 4240            | 6221             | 6529           | 532            | 3329             | 5530              | 6451            |
| 53856           | Prg3           | 10            | 3               | 34               | 34             | 10             | 3                | 27                | 31              |
| 53857           | Tuba8          | 11            | 8               | 29               | 36             | 10             | 8                | 26                | 38              |
| 53859           | Map3k14        | 93            | 893             | 605              | 344            | 81             | 731              | 505               | 294             |
| 53860           | 9-Sep          | 306           | 6397            | 377              | 590            | 67             | 1388             | 75                | 114             |
| 53867           | Col5a3         | 21            | 5               | 32               | 19             | 19             | 22               | 33                | 25              |
| 53868           | Rab25          | 12            | 15              | 51               | 96             | 12             | 17               | 41                | 96              |
| 53869           | Rab11a         | 68            | 729             | 225              | 2383           | 78             | 893              | 290               | 2580            |
| 53870           | Cntn6          | 5             | 4               | 37               | 47             | 5              | 4                | 37                | 51              |
| 53871           | Pkd2l2         | 6             | 10              | 31               | 46             | 5              | 8                | 25                | 64              |
| 53878           | Svs2           | 5             | 2               | 23               | 25             | 5              | 3                | 22                | 30              |
| 53881           | Slc5a3         | 68            | 10              | 31               | 27             | 37             | 8                | 31                | 25              |

| NCBI<br>Gene ID | Gene<br>Symbol | Affy.<br>CD4+ | Agilent<br>CD4+ | Illumina<br>CD4+ | Nimbl.<br>CD4+ | Affy.<br>CD19+ | Agilent<br>CD19+ | Illumina<br>CD19+ | Nimbl.<br>CD19+ |
|-----------------|----------------|---------------|-----------------|------------------|----------------|----------------|------------------|-------------------|-----------------|
| 53883           | Celsr2         | 21            | 81              | 44               | 44             | 15             | 74               | 34                | 49              |
| 53885           | Nphp1          | 7             | 5               | 27               | 73             | 7              | 11               | 28                | 115             |
| 53886           | Cdkl2          | 5             | 9               | 46               | 193            | 5              | 5                | 43                | 144             |
| 53890           | Sart3          | 78            | 2822            | 76               | 1100           | 78             | 3287             | 76                | 1126            |
| 53892           | Ppm1d          | 94            | 81              | 313              | 1687           | 120            | 97               | 454               | 1887            |
| 53893           | Nudt5          | 40            | 167             | 240              | 1174           | 44             | 258              | 288               | 1324            |
| 53895           | Clpp           | 70            | 719             | 759              | 780            | 66             | 941              | 827               | 916             |
| 53896           | Slc7a10        | 11            | 2               | 29               | 40             | 10             | 3                | 27                | 34              |
| 53897           | Gal3st1        | 8             | 5               | 29               | 39             | 7              | 4                | 37                | 29              |
| 53945           | Slc40a1        | 5             | 6               | 30               | 29             | 7              | 36               | 103               | 109             |
| 53970           | Rfx5           | 43            | 9               | 262              | 1354           | 124            | 52               | 1037              | 2994            |
| 53972           | Ngef           | 10            | 16              | 26               | 32             | 9              | 24               | 25                | 39              |
| 53975           | Ddx20          | 47            | 522             | 443              | 412            | 61             | 546              | 534               | 405             |
| 53978           | Edg4           | 36            | 14              | 42               | 46             | 41             | 46               | 74                | 134             |
| 54003           | Nell2          | 7             | 14              | 35               | 60             | 7              | 15               | 36                | 83              |
| 54004           | Diap2          | 97            | 228             | 79               | 1597           | 58             | 107              | 59                | 1187            |
| 54006           | Deaf1          | 61            | 166             | 30               | 242            | 42             | 71               | 33                | 175             |
| 54123           | Irf7           | 98            | 130             | 160              | 1185           | 63             | 88               | 104               | 584             |
| 54125           | Polm           | 19            | 1207            | 90               | 1029           | 48             | 3518             | 185               | 2143            |
| 54126           | Arhgef7        | 64            | 228             | 26               | 2223           | 58             | 208              | 31                | 1927            |
| 54127           | Rps28          | 1495          | 68236           | 13295            | 46526          | 1340           | 59995            | 12961             | 39806           |
| 54128           | Pmm2           | 148           | 246             | 507              | 1064           | 102            | 210              | 343               | 751             |
| 54130           | Actr1a         | 89            | 1614            | 1122             | 4087           | 93             | 1598             | 1006              | 4175            |
| 54131           | Irf3           | 129           | 5613            | 3212             | 1639           | 133            | 6985             | 3113              | 1402            |
| 54132           | Pdlim1         | 237           | 3207            | 4115             | 6428           | 67             | 750              | 1159              | 1421            |
| 54137           | Acrbp          | 54            | 387             | 59               | 919            | 43             | 274              | 55                | 634             |
| 54139           | Irf6           | 28            | 259             | 177              | 1111           | 15             | 18               | 25                | 19              |
| 54140           | Avpr1a         | 7             | 2               | 22               | 23             | 8              | 3                | 21                | 26              |
| 54141           | Spag5          | 5             | 6               | 58               | 48             | 7              | 32               | 117               | 97              |
| 54150           | Rdh7           | 4             | 5               | 23               | 21             | 5              | 4                | 26                | 18              |
| 54151           | Cyhr1          | 72            | 543             | 305              | 1766           | 72             | 451              | 237               | 1774            |
| 54152           | Dnalc4         | 24            | 148             | 22               | 975            | 30             | 205              | 21                | 1447            |
| 54153           | Rasa4          | 13            | 61              | 36               | 145            | 15             | 125              | 39                | 343             |
| 54156           | Egfl6          | 5             | 3               | 26               | 17             | 6              | 4                | 25                | 35              |
| 54159           | Ear5           | 5             | 2               | 28               | 19             | 5              | 3                | 28                | 23              |
| 54160           | Copg2          | 130           | 117             | 45               | 826            | 220            | 191              | 70                | 1259            |
| 54161           | Copg           | 98            | 1737            | 497              | 3649           | 94             | 1291             | 396               | 2840            |
| 54167           | Icos           | 86            | 856             | 184              | 970            | 12             | 30               | 17                | 24              |
| 54169           | Myst4          | 80            | 106             | 397              | 334            | 57             | 82               | 279               | 307             |
| 54170           | Rragc          | 51            | 559             | 912              | 4346           | 65             | 523              | 873               | 3490            |
| 54188           | Cpsf4          | 66            | 1647            | 66               | 61             | 61             | 1458             | 67                | 40              |
| 54189           | Rabep1         | 57            | 203             | 60               | 860            | 73             | 287              | 87                | 879             |
| 54192           | Pbsn           | 4             | 2               | 18               | 19             | 4              | 3                | 17                | 25              |
| 54194           | Akap8l         | 130           | 540             | 1280             | 4798           | 110            | 450              | 869               | 3918            |
| 54195           | Gucy1b3        | 5             | 14              | 51               | 25             | 4              | 6                | 34                | 15              |
| 54196           | Pabpn1         | 264           | 1321            | 2233             | 14185          | 287            | 1283             | 1849              | 11194           |
| 54197           | Rnf5           | 101           | 377             | 331              | 4178           | 86             | 318              | 266               | 3762            |
| 54198           | Snx3           | 287           | 818             | 166              | 5242           | 273            | 794              | 140               | 4520            |
| 54199           | Ccrl2          | 10            | 15              | 39               | 152            | 10             | 21               | 53                | 318             |
| 54200           | Sult2b1        | 9             | 14              | 53               | 198            | 8              | 15               | 49                | 178             |
| 54201           | Zfp316         | 8             | 4               | 31               | 86             | 10             | 6                | 32                | 142             |

| NCBI<br>Gene ID | Gene<br>Symbol | Affy.<br>CD4+ | Agilent<br>CD4+ | Illumina<br>CD4+ | Nimbl.<br>CD4+ | Affy.<br>CD19+ | Agilent<br>CD19+ | Illumina<br>CD19+ | Nimbl.<br>CD19+ |
|-----------------|----------------|---------------|-----------------|------------------|----------------|----------------|------------------|-------------------|-----------------|
| 54204           | 1-Sep          | 317           | 181             | 341              | 1624           | 162            | 90               | 152               | 581             |
| 54208           | Arl6ip1        | 396           | 549             | 3955             | 11289          | 473            | 570              | 4365              | 10668           |
| 54214           | Golga4         | 57            | 1432            | 29               | 992            | 51             | 984              | 27                | 724             |
| 54215           | Cd160          | 8             | 7               | 60               | 150            | 8              | 12               | 26                | 42              |
| 54216           | Pcdh7          | 7             | 3               | 33               | 14             | 7              | 3                | 32                | 16              |
| 54217           | Rpl36          | 1010          | 22543           | 4704             | 12897          | 925            | 19346            | 3798              | 16764           |
| 54218           | B3galt4        | 30            | 339             | 179              | 376            | 18             | 149              | 77                | 167             |
| 54325           | Elovl1         | 96            | 883             | 280              | 4230           | 92             | 955              | 284               | 3297            |
| 54326           | Elovl2         | 5             | 8               | 22               | 37             | 5              | 4                | 26                | 65              |
| 54338           | Slc23a2        | 114           | 78              | 71               | 547            | 99             | 54               | 61                | 428             |
| 54342           | Gnpnat1        | 30            | 64              | 23               | 2927           | 22             | 42               | 18                | 2028            |
| 54343           | Atf7ip         | 650           | 1306            | 967              | 2531           | 557            | 823              | 808               | 1758            |
| 54351           | Rai12          | 63            | 448             | 541              | 2034           | 89             | 468              | 697               | 2068            |
| 54352           | Irx5           | 8             | 3               | 24               | 61             | 7              | 3                | 26                | 61              |
| 54354           | Rassf5         | 256           | 679             | 1013             | 8939           | 152            | 385              | 524               | 4130            |
| 54364           | Rpp30          | 55            | 163             | 277              | 1087           | 61             | 146              | 280               | 930             |
| 54367           | Zfp326         | 36            | 259             | 55               | 4922           | 34             | 213              | 60                | 4628            |
| 54368           | Gp9            | 12            | 4               | 23               | 138            | 12             | 6                | 21                | 143             |
| 54369           | Nme6           | 19            | 23              | 48               | 459            | 24             | 48               | 75                | 694             |
| 54371           | Chst2          | 14            | 8               | 43               | 156            | 14             | 3                | 37                | 34              |
| 54373           | Prss16         | 7             | 6               | 42               | 40             | 8              | 11               | 43                | 42              |
| 54376           | Cacng3         | 5             | 2               | 27               | 78             | 5              | 3                | 30                | 126             |
| 54377           | Cacng4         | 18            | 10              | 18               | 125            | 17             | 11               | 18                | 69              |
| 54380           | Smarcal1       | 50            | 219             | 31               | 1114           | 72             | 321              | 28                | 1575            |
| 54381           | Pgcp           | 8             | 4               | 32               | 51             | 8              | 11               | 27                | 41              |
| 54383           | Phc2           | 47            | 1661            | 925              | 434            | 61             | 2288             | 1287              | 659             |
| 54384           | Mtmr7          | 9             | 5               | 21               | 112            | 7              | 3                | 20                | 50              |
| 54387           | Mcm3ap         | 107           | 96              | 26               | 5745           | 82             | 74               | 22                | 4417            |
| 54388           | Hils1          | 11            | 3               | 26               | 37             | 10             | 3                | 25                | 43              |
| 54391           | Rfk            | 76            | 267             | 26               | 5735           | 144            | 650              | 29                | 9844            |
| 54393           | Gabbr1         | 110           | 254             | 203              | 8568           | 57             | 104              | 103               | 3961            |
| 54394           | Crif3          | 442           | 3773            | 1045             | 14526          | 397            | 2914             | 761               | 13991           |
| 54396           | Igtp           | 108           | 3888            | 1693             | 6511           | 45             | 1125             | 426               | 1601            |
| 54397           | Ppt2           | 20            | 63              | 449              | 44             | 10             | 19               | 68                | 24              |
| 54399           | Bet1l          | 31            | 1193            | 716              | 4213           | 28             | 1113             | 677               | 3515            |
| 54401           | Ywhab          | 331           | 771             | 1800             | 13273          | 268            | 645              | 1231              | 9557            |
| 54402           | Stk19          | 41            | 252             | 151              | 376            | 38             | 287              | 162               | 454             |
| 54403           | Slc4a4         | 5             | 13              | 27               | 68             | 5              | 24               | 26                | 57              |
| 54405           | Ndufa1         | 91            | 2381            | 2237             | 4053           | 92             | 2210             | 2025              | 4349            |
| 54409           | Ramp2          | 7             | 2               | 37               | 32             | 5              | 3                | 38                | 29              |
| 54411           | Atp6ap1        | 208           | 264             | 2049             | 3222           | 384            | 466              | 3029              | 4736            |
| 54418           | Fmn2           | 5             | 41              | 28               | 25             | 5              | 45               | 31                | 29              |
| 54420           | Cldn8          | 5             | 2               | 25               | 39             | 5              | 3                | 24                | 30              |
| 54422           | Barhl1         | 15            | 332             | 40               | 131            | 12             | 216              | 27                | 106             |
| 54426           | Hgfac          | 9             | 27              | 25               | 130            | 8              | 27               | 26                | 136             |
| 54427           | Dnmt3l         | 5             | 25              | 20               | 78             | 5              | 31               | 25                | 48              |
| 54446           | Nfat5          | 73            | 302             | 836              | 2639           | 106            | 304              | 1021              | 2525            |
| 54447           | Asah2          | 24            | 7               | 61               | 27             | 27             | 7                | 73                | 21              |
| 54448           | Il1f6          | 6             | 2               | 23               | 14             | 6              | 3                | 27                | 14              |
| 54450           | Il1f5          | 8             | 7               | 26               | 28             | 8              | 3                | 22                | 23              |
| 54451           | Cpsf3          | 153           | 1161            | 24               | 3157           | 187            | 1419             | 28                | 3014            |



| NCBI<br>Gene ID | Gene<br>Symbol | Affy.<br>CD4+ | Agilent<br>CD4+ | Illumina<br>CD4+ | Nimbl.<br>CD4+ | Affy.<br>CD19+ | Agilent<br>CD19+ | Illumina<br>CD19+ | Nimbl.<br>CD19+ |
|-----------------|----------------|---------------|-----------------|------------------|----------------|----------------|------------------|-------------------|-----------------|
| 54473           | Tollip         | 77            | 459             | 318              | 239            | 82             | 371              | 302               | 174             |
| 54483           | Mefv           | 6             | 8               | 22               | 53             | 6              | 9                | 21                | 61              |
| 54484           | Mkrr1          | 117           | 707             | 186              | 7715           | 98             | 362              | 121               | 5874            |
| 54485           | Dll4           | 21            | 12              | 30               | 21             | 21             | 11               | 27                | 20              |
| 54486           | Ptgds2         | 6             | 3               | 21               | 99             | 8              | 11               | 31                | 183             |
| 54519           | Apbb1ip        | 215           | 1203            | 261              | 5046           | 130            | 489              | 125               | 2747            |
| 54524           | Syt6           | 12            | 9               | 24               | 58             | 13             | 7                | 27                | 59              |
| 54525           | Syt7           | 11            | 9               | 34               | 108            | 9              | 21               | 29                | 92              |
| 54526           | Syt10          | 6             | 407             | 19               | 23             | 6              | 211              | 21                | 17              |
| 54561           | Nap1l3         | 5             | 12              | 22               | 16             | 5              | 14               | 27                | 31              |
| 54562           | Lrrc6          | 5             | 6               | 17               | 31             | 4              | 4                | 22                | 29              |
| 54563           | Nup210         | 485           | 6099            | 6383             | 10847          | 316            | 3269             | 4249              | 5978            |
| 54598           | Calcr1         | 136           | 594             | 30               | 828            | 50             | 229              | 26                | 308             |
| 54604           | Pcnx           | 78            | 55              | 63               | 754            | 79             | 33               | 50                | 682             |
| 54607           | Socs6          | 48            | 100             | 65               | 630            | 57             | 86               | 64                | 457             |
| 54608           | Abhd2          | 161           | 51              | 52               | 128            | 105            | 40               | 37                | 112             |
| 54609           | Ubqln2         | 48            | 69              | 28               | 118            | 48             | 33               | 27                | 83              |
| 54610           | Tbc1d8         | 9             | 7               | 26               | 386            | 9              | 3                | 24                | 323             |
| 54611           | Pde3a          | 6             | 3               | 30               | 43             | 6              | 4                | 36                | 67              |
| 54612           | Sfrp5          | 10            | 34              | 22               | 114            | 10             | 29               | 25                | 100             |
| 54615           | Npff           | 62            | 378             | 69               | 822            | 61             | 337              | 61                | 763             |
| 54616           | Extl3          | 105           | 457             | 1647             | 608            | 77             | 332              | 1154              | 348             |
| 54630           | Lmo6           | 41            | 298             | 462              | 168            | 39             | 228              | 326               | 140             |
| 54631           | Nphs1          | 7             | 7               | 35               | 69             | 7              | 4                | 34                | 62              |
| 54633           | Pqbp1          | 207           | 362             | 709              | 1695           | 345            | 679              | 1079              | 2229            |
| 54635           | Pdgfc          | 6             | 4               | 31               | 15             | 6              | 3                | 30                | 25              |
| 54646           | Ppp1r3f        | 39            | 86              | 270              | 4499           | 18             | 19               | 83                | 1214            |
| 54650           | Sfmbt1         | 33            | 24              | 46               | 233            | 43             | 25               | 47                | 323             |
| 54651           | Usp27x         | 11            | 7               | 30               | 29             | 9              | 12               | 25                | 34              |
| 54652           | Cacna1f        | 6             | 5               | 28               | 69             | 6              | 7                | 32                | 49              |
| 54667           | Atp8b2         | 187           | 870             | 35               | 1406           | 101            | 601              | 32                | 438             |
| 54670           | Atp8b1         | 5             | 2               | 26               | 19             | 5              | 5                | 27                | 18              |
| 54672           | Gpr97          | 13            | 109             | 48               | 83             | 10             | 15               | 25                | 31              |
| 54673           | Sh3glb1        | 219           | 35              | 346              | 14966          | 256            | 36               | 390               | 15622           |
| 54683           | Prdx5          | 143           | 462             | 1901             | 10056          | 180            | 622              | 2406              | 10574           |
| 54698           | Crtam          | 18            | 304             | 46               | 117            | 7              | 17               | 24                | 43              |
| 54710           | Hs3st3b1       | 67            | 97              | 66               | 1329           | 22             | 24               | 28                | 88              |
| 54711           | Plagl2         | 100           | 114             | 638              | 697            | 86             | 94               | 549               | 581             |
| 54712           | Plxnc1         | 22            | 76              | 42               | 157            | 176            | 600              | 218               | 136             |
| 54721           | Tyk2           | 78            | 228             | 99               | 1058           | 73             | 194              | 86                | 1077            |
| 54722           | Dfna5h         | 12            | 16              | 23               | 125            | 14             | 7                | 21                | 40              |
| 54723           | Tfip11         | 109           | 436             | 264              | 999            | 113            | 445              | 246               | 1191            |
| 55925           | Syt8           | 11            | 2               | 27               | 74             | 10             | 3                | 32                | 80              |
| 55927           | Hes6           | 52            | 719             | 1554             | 8980           | 57             | 1176             | 2296              | 14684           |
| 55935           | Fnbp4          | 224           | 121             | 156              | 8273           | 259            | 156              | 197               | 7514            |
| 55936           | Ctps2          | 159           | 2158            | 85               | 4922           | 145            | 1499             | 70                | 4335            |
| 55938           | Apom           | 6             | 10              | 37               | 56             | 6              | 22               | 41                | 59              |
| 55942           | Sertad1        | 53            | 681             | 376              | 3033           | 42             | 569              | 253               | 2515            |
| 55943           | Stx8           | 47            | 543             | 619              | 519            | 52             | 800              | 840               | 669             |
| 55946           | Ap3m1          | 78            | 242             | 93               | 3989           | 56             | 202              | 89                | 3563            |
| 55947           | Dclre1a        | 14            | 19              | 26               | 204            | 12             | 15               | 25                | 115             |

| NCBI<br>Gene ID | Gene<br>Symbol | Affy.<br>CD4+ | Agilent<br>CD4+ | Illumina<br>CD4+ | Nimbl.<br>CD4+ | Affy.<br>CD19+ | Agilent<br>CD19+ | Illumina<br>CD19+ | Nimbl.<br>CD19+ |
|-----------------|----------------|---------------|-----------------|------------------|----------------|----------------|------------------|-------------------|-----------------|
| 55948           | Sfn            | 80            | 700             | 57               | 35             | 72             | 855              | 59                | 31              |
| 55949           | Eef1b2         | 484           | 18040           | 8115             | 23662          | 349            | 13499            | 5190              | 21397           |
| 55950           | Bri3           | 50            | 714             | 833              | 8784           | 50             | 721              | 908               | 11039           |
| 55951           | Brp44l         | 32            | 511             | 18               | 4627           | 47             | 672              | 30                | 7211            |
| 55960           | Ebag9          | 36            | 484             | 43               | 3614           | 38             | 508              | 49                | 3362            |
| 55961           | Slc13a1        | 5             | 3               | 25               | 28             | 5              | 3                | 24                | 22              |
| 55963           | Slc1a4         | 7             | 10              | 47               | 28             | 7              | 8                | 48                | 20              |
| 55979           | Agpat1         | 134           | 147             | 60               | 101            | 137            | 154              | 54                | 87              |
| 55980           | Impa1          | 51            | 971             | 50               | 17203          | 43             | 801              | 56                | 13920           |
| 55981           | Pigb           | 49            | 6               | 45               | 1404           | 45             | 4                | 38                | 498             |
| 55982           | Paxip1         | 83            | 281             | 42               | 51             | 78             | 207              | 33                | 53              |
| 55983           | Pdzrn3         | 5             | 5               | 23               | 69             | 5              | 3                | 22                | 97              |
| 55984           | Camkk1         | 15            | 114             | 57               | 260            | 10             | 43               | 41                | 383             |
| 55985           | Cxcl13         | 5             | 2               | 35               | 22             | 5              | 5                | 31                | 20              |
| 55987           | Cpxm2          | 10            | 7               | 27               | 37             | 9              | 7                | 29                | 44              |
| 55988           | Snx12          | 55            | 872             | 122              | 742            | 54             | 822              | 114               | 599             |
| 55989           | Nol5           | 131           | 1030            | 705              | 3748           | 130            | 948              | 664               | 3061            |
| 55990           | Fmo2           | 5             | 12              | 35               | 15             | 6              | 15               | 34                | 17              |
| 55991           | Panx1          | 80            | 2743            | 473              | 1405           | 69             | 2241             | 332               | 1153            |
| 55992           | Trim3          | 45            | 124             | 28               | 46             | 64             | 122              | 30                | 62              |
| 55993           | Msh4           | 6             | 3               | 19               | 28             | 5              | 3                | 21                | 30              |
| 55994           | Smad9          | 9             | 5               | 26               | 12             | 9              | 10               | 20                | 14              |
| 56009           | Refbp2         | 25            | 695             | 78               | 1204           | 40             | 1099             | 137               | 2484            |
| 56012           | Pgam2          | 20            | 3               | 31               | 32             | 23             | 3                | 34                | 33              |
| 56014           | Olf70          | 9             | 4               | 27               | 50             | 9              | 4                | 26                | 48              |
| 56015           | Olf71          | 17            | 26              | 31               | 64             | 18             | 30               | 25                | 33              |
| 56016           | Hebp2          | 10            | 12              | 33               | 62             | 12             | 10               | 36                | 24              |
| 56017           | Slc2a8         | 18            | 56              | 39               | 233            | 20             | 64               | 41                | 321             |
| 56018           | Stard10        | 31            | 230             | 85               | 187            | 77             | 660              | 160               | 647             |
| 56031           | Ppie           | 34            | 99              | 24               | 1095           | 38             | 86               | 26                | 1020            |
| 56032           | Tusc4          | 49            | 286             | 1028             | 1908           | 45             | 245              | 912               | 1257            |
| 56036           | Ccnl2          | 294           | 3081            | 27               | 1924           | 274            | 2561             | 28                | 1532            |
| 56040           | Rplp1          | 3460          | 177066          | 17353            | 12937          | 2647           | 206901           | 17165             | 11232           |
| 56041           | Vdp            | 151           | 227             | 333              | 2150           | 146            | 167              | 315               | 1814            |
| 56043           | Akr1e1         | 9             | 18              | 52               | 254            | 6              | 10               | 45                | 85              |
| 56044           | Rala           | 114           | 410             | 140              | 3103           | 105            | 345              | 121               | 2578            |
| 56045           | Samhd1         | 666           | 680             | 1610             | 9273           | 972            | 846              | 2037              | 9393            |
| 56047           | Msln           | 14            | 2               | 67               | 24             | 10             | 3                | 52                | 26              |
| 56048           | Lgals8         | 134           | 579             | 238              | 7542           | 237            | 971              | 357               | 10194           |
| 56050           | Cyp39a1        | 13            | 9               | 39               | 26             | 67             | 68               | 45                | 292             |
| 56055           | Gtpbp2         | 122           | 778             | 2505             | 360            | 112            | 773              | 2286              | 290             |
| 56057           | Btg4           | 6             | 2               | 28               | 44             | 5              | 3                | 25                | 43              |
| 56066           | Cxcl11         | 5             | 3               | 25               | 67             | 7              | 3                | 27                | 47              |
| 56068           | Ammecr1        | 40            | 24              | 68               | 44             | 43             | 20               | 73                | 30              |
| 56069           | Il17b          | 11            | 9               | 22               | 110            | 11             | 13               | 22                | 93              |
| 56070           | Tcerg1         | 139           | 98              | 815              | 2382           | 152            | 96               | 922               | 2331            |
| 56072           | Lgals12        | 11            | 2               | 25               | 63             | 9              | 3                | 25                | 105             |
| 56077           | Dgke           | 51            | 117             | 71               | 632            | 42             | 101              | 66                | 263             |
| 56078           | Car5b          | 6             | 19              | 28               | 69             | 6              | 22               | 29                | 67              |
| 56079           | Astn2          | 16            | 6               | 28               | 22             | 18             | 14               | 26                | 29              |
| 56085           | Ubqln1         | 149           | 405             | 2227             | 624            | 182            | 598              | 2307              | 762             |

| NCBI<br>Gene ID | Gene<br>Symbol | Affy.<br>CD4+ | Agilent<br>CD4+ | Illumina<br>CD4+ | Nimbl.<br>CD4+ | Affy.<br>CD19+ | Agilent<br>CD19+ | Illumina<br>CD19+ | Nimbl.<br>CD19+ |
|-----------------|----------------|---------------|-----------------|------------------|----------------|----------------|------------------|-------------------|-----------------|
| 56086           | Set            | 392           | 1978            | 375              | 13371          | 441            | 2876             | 396               | 13886           |
| 56087           | Dnahc10        | 17            | 4               | 23               | 47             | 13             | 3                | 23                | 55              |
| 56088           | Dscr2          | 75            | 325             | 446              | 3278           | 51             | 169              | 294               | 1611            |
| 56089           | Ramp3          | 15            | 206             | 56               | 433            | 11             | 28               | 32                | 37              |
| 56092           | Cts7           | 6             | 2               | 23               | 38             | 5              | 2                | 24                | 31              |
| 56093           | Pfpl           | 5             | 66              | 31               | 18             | 5              | 68               | 32                | 34              |
| 56094           | Cts8           | 4             | 4               | 21               | 19             | 4              | 3                | 16                | 19              |
| 56095           | Ftsj3          | 124           | 228             | 310              | 6494           | 146            | 209              | 313               | 6071            |
| 56096           | Plac1          | 6             | 9               | 24               | 72             | 6              | 5                | 28                | 52              |
| 56149           | Grasp          | 15            | 41              | 106              | 86             | 14             | 28               | 64                | 134             |
| 56150           | Mad2l1         | 36            | 34              | 80               | 1054           | 60             | 61               | 162               | 1992            |
| 56173           | Cldn14         | 20            | 90              | 20               | 83             | 23             | 84               | 26                | 106             |
| 56174           | Nagk           | 32            | 46              | 270              | 472            | 33             | 82               | 345               | 729             |
| 56175           | Bace2          | 5             | 4               | 33               | 15             | 6              | 3                | 36                | 16              |
| 56177           | Olfm1          | 11            | 7               | 21               | 24             | 10             | 7                | 20                | 27              |
| 56183           | Nmu            | 5             | 2               | 28               | 28             | 5              | 3                | 28                | 29              |
| 56184           | Msgn1          | 24            | 23              | 38               | 25             | 25             | 25               | 36                | 23              |
| 56185           | Hao3           | 4             | 2               | 31               | 18             | 5              | 3                | 19                | 17              |
| 56187           | Rabgta         | 88            | 310             | 365              | 2289           | 83             | 293              | 274               | 2295            |
| 56188           | Fxyd1          | 12            | 13              | 44               | 46             | 12             | 8                | 41                | 58              |
| 56189           | Prodh2         | 10            | 35              | 29               | 53             | 9              | 25               | 26                | 61              |
| 56191           | Tro            | 8             | 4450            | 23               | 36             | 7              | 11               | 28                | 26              |
| 56195           | Ptbp2          | 150           | 227             | 68               | 1757           | 162            | 265              | 74                | 1658            |
| 56196           | Ttrap          | 73            | 530             | 28               | 3540           | 68             | 542              | 30                | 3291            |
| 56198           | Heyl           | 13            | 12              | 19               | 21             | 12             | 18               | 19                | 19              |
| 56199           | Abcb10         | 14            | 19              | 52               | 72             | 34             | 58               | 123               | 543             |
| 56200           | Ddx21          | 231           | 511             | 1198             | 1882           | 230            | 476              | 1168              | 1861            |
| 56205           | Ensa           | 56            | 96              | 30               | 2977           | 62             | 184              | 36                | 3848            |
| 56207           | Uchl5          | 113           | 884             | 678              | 6848           | 108            | 641              | 687               | 7317            |
| 56208           | Becn1          | 108           | 401             | 1561             | 9130           | 110            | 422              | 1422              | 7212            |
| 56209           | Mir16          | 69            | 186             | 321              | 624            | 101            | 244              | 357               | 647             |
| 56212           | Rhog           | 323           | 1348            | 779              | 2515           | 281            | 1245             | 626               | 2327            |
| 56214           | Scamp4         | 156           | 939             | 698              | 401            | 114            | 621              | 481               | 305             |
| 56215           | Acin1          | 359           | 2586            | 587              | 3697           | 312            | 3235             | 427               | 2575            |
| 56216           | Stx1b2         | 8             | 4               | 28               | 43             | 7              | 4                | 27                | 45              |
| 56217           | Mpp5           | 48            | 29              | 36               | 637            | 56             | 27               | 36                | 503             |
| 56219           | Extl1          | 12            | 8               | 26               | 24             | 14             | 30               | 41                | 33              |
| 56221           | Ccl24          | 7             | 5               | 20               | 65             | 7              | 36               | 22                | 74              |
| 56223           | Fscn3          | 7             | 190             | 18               | 50             | 6              | 179              | 25                | 52              |
| 56226           | Espn           | 19            | 21              | 35               | 78             | 16             | 19               | 28                | 136             |
| 56228           | Ube2j1         | 230           | 643             | 382              | 2008           | 189            | 571              | 315               | 1873            |
| 56229           | Thsd1          | 19            | 11              | 36               | 71             | 18             | 9                | 31                | 48              |
| 56233           | Hdac7a         | 232           | 1539            | 699              | 1261           | 198            | 1172             | 490               | 875             |
| 56249           | Actr8          | 91            | 666             | 93               | 5632           | 89             | 549              | 92                | 5493            |
| 56258           | Hnrph2         | 108           | 1878            | 31               | 1502           | 157            | 2190             | 28                | 1364            |
| 56264           | Cpxm1          | 11            | 13              | 20               | 147            | 10             | 12               | 25                | 76              |
| 56273           | Pex14          | 57            | 69              | 217              | 198            | 62             | 70               | 248               | 233             |
| 56274           | Stk3           | 13            | 36              | 39               | 606            | 11             | 36               | 36                | 601             |
| 56275           | Rbm14          | 171           | 996             | 99               | 158            | 175            | 1348             | 88                | 250             |
| 56278           | Gkap1          | 6             | 15              | 39               | 60             | 7              | 140              | 69                | 155             |
| 56280           | Mrpl37         | 65            | 132             | 815              | 878            | 86             | 111              | 801               | 875             |

| NCBI<br>Gene ID | Gene<br>Symbol | Affy.<br>CD4+ | Agilent<br>CD4+ | Illumina<br>CD4+ | Nimbl.<br>CD4+ | Affy.<br>CD19+ | Agilent<br>CD19+ | Illumina<br>CD19+ | Nimbl.<br>CD19+ |
|-----------------|----------------|---------------|-----------------|------------------|----------------|----------------|------------------|-------------------|-----------------|
| 56282           | Mrpl12         | 56            | 984             | 911              | 1384           | 52             | 1251             | 962               | 1908            |
| 56284           | Mrpl19         | 39            | 213             | 476              | 1322           | 45             | 205              | 431               | 1286            |
| 56289           | Rassf1         | 48            | 609             | 576              | 165            | 39             | 378              | 394               | 210             |
| 56291           | Styx           | 75            | 78              | 64               | 1802           | 82             | 71               | 79                | 2049            |
| 56292           | Ard1           | 80            | 270             | 2119             | 1220           | 61             | 192              | 1547              | 1108            |
| 56293           | Amac1          | 6             | 67              | 26               | 51             | 6              | 54               | 29                | 45              |
| 56294           | Ptpn9          | 37            | 28              | 47               | 1268           | 41             | 27               | 43                | 1135            |
| 56297           | Arl6           | 6             | 8               | 49               | 42             | 8              | 11               | 62                | 73              |
| 56298           | Arl6ip2        | 62            | 148             | 137              | 5859           | 78             | 143              | 177               | 7063            |
| 56299           | Fkbp1          | 15            | 157             | 43               | 71             | 15             | 230              | 46                | 77              |
| 56305           | Pitpnb         | 196           | 224             | 681              | 1537           | 164            | 173              | 563               | 1811            |
| 56306           | Tera           | 122           | 228             | 27               | 964            | 150            | 350              | 32                | 1225            |
| 56307           | Metap2         | 107           | 932             | 134              | 3813           | 112            | 1065             | 123               | 2014            |
| 56309           | Mycbp          | 19            | 20              | 115              | 736            | 23             | 34               | 201               | 1099            |
| 56310           | Gps2           | 207           | 301             | 1063             | 359            | 199            | 248              | 916               | 415             |
| 56312           | Nupr1          | 11            | 5               | 21               | 109            | 11             | 3                | 26                | 140             |
| 56314           | Zfp113         | 63            | 22              | 85               | 780            | 52             | 10               | 66                | 925             |
| 56315           | Rhcg           | 9             | 33              | 30               | 24             | 10             | 32               | 26                | 27              |
| 56316           | Ggcx           | 37            | 23              | 41               | 31             | 35             | 42               | 42                | 27              |
| 56317           | Anapc7         | 90            | 403             | 355              | 178            | 85             | 468              | 363               | 176             |
| 56318           | Acpp           | 21            | 57              | 172              | 615            | 8              | 19               | 29                | 35              |
| 56320           | Dbn1           | 12            | 11              | 24               | 74             | 11             | 17               | 25                | 136             |
| 56321           | Aatf           | 79            | 92              | 696              | 3848           | 78             | 67               | 732               | 3211            |
| 56322           | Timm22         | 37            | 619             | 33               | 2803           | 44             | 619              | 39                | 3274            |
| 56323           | Dnajb5         | 43            | 37              | 276              | 51             | 38             | 47               | 251               | 54              |
| 56324           | Stam2          | 109           | 58              | 60               | 664            | 100            | 44               | 67                | 767             |
| 56325           | Abcb9          | 28            | 1546            | 584              | 303            | 14             | 98               | 52                | 30              |
| 56327           | Arl2           | 44            | 98              | 114              | 783            | 56             | 103              | 117               | 834             |
| 56330           | Pdcd5          | 92            | 635             | 326              | 10435          | 102            | 827              | 304               | 13111           |
| 56332           | Amotl2         | 11            | 38              | 24               | 24             | 9              | 28               | 20                | 22              |
| 56335           | Mettl3         | 141           | 498             | 762              | 2605           | 139            | 557              | 818               | 2110            |
| 56336           | B4galt5        | 62            | 11              | 38               | 987            | 96             | 12               | 44                | 1320            |
| 56338           | Txnip          | 913           | 3220            | 7168             | 13033          | 665            | 1959             | 5130              | 9397            |
| 56348           | Hsd17b12       | 70            | 26              | 225              | 756            | 77             | 37               | 243               | 611             |
| 56349           | Net1           | 23            | 9               | 62               | 4295           | 24             | 6                | 54                | 2820            |
| 56350           | Arl3           | 42            | 80              | 146              | 1220           | 56             | 87               | 176               | 1374            |
| 56353           | Rybp           | 34            | 403             | 230              | 1352           | 36             | 272              | 188               | 873             |
| 56354           | Dnajc7         | 414           | 1166            | 1513             | 3887           | 508            | 1599             | 2111              | 3902            |
| 56356           | Gltp           | 269           | 304             | 4440             | 4733           | 130            | 123              | 1979              | 1897            |
| 56357           | Ivd            | 90            | 463             | 427              | 216            | 87             | 561              | 462               | 242             |
| 56358           | Copz2          | 10            | 2               | 68               | 55             | 9              | 4                | 63                | 52              |
| 56361           | Pus1           | 68            | 233             | 196              | 1183           | 68             | 328              | 166               | 1088            |
| 56362           | Sult1b1        | 4             | 3               | 20               | 16             | 4              | 3                | 23                | 22              |
| 56363           | Tmeff2         | 7             | 3               | 31               | 16             | 7              | 5                | 33                | 21              |
| 56365           | Clnkb          | 8             | 2               | 45               | 95             | 8              | 3                | 43                | 78              |
| 56367           | Scoc           | 26            | 27              | 308              | 381            | 28             | 19               | 289               | 384             |
| 56368           | Cyb561d2       | 33            | 291             | 35               | 538            | 30             | 337              | 32                | 690             |
| 56370           | Tagln3         | 11            | 14              | 30               | 113            | 9              | 9                | 25                | 117             |
| 56371           | Fzr1           | 79            | 366             | 185              | 1226           | 101            | 508              | 201               | 1879            |
| 56372           | 110004f10r     | 98            | 972             | 28               | 8178           | 91             | 1159             | 29                | 6795            |
| 56373           | Cpb2           | 4             | 164             | 25               | 23             | 5              | 295              | 23                | 21              |

| NCBI<br>Gene ID | Gene<br>Symbol | Affy.<br>CD4+ | Agilent<br>CD4+ | Illumina<br>CD4+ | Nimbl.<br>CD4+ | Affy.<br>CD19+ | Agilent<br>CD19+ | Illumina<br>CD19+ | Nimbl.<br>CD19+ |
|-----------------|----------------|---------------|-----------------|------------------|----------------|----------------|------------------|-------------------|-----------------|
| 56375           | B4galt4        | 7             | 14              | 30               | 39             | 7              | 18               | 31                | 32              |
| 56378           | Arpc3          | 141           | 1414            | 1500             | 10696          | 203            | 1787             | 1939              | 14059           |
| 56380           | Arid3b         | 101           | 1809            | 694              | 3286           | 106            | 2452             | 742               | 4336            |
| 56382           | Rab9           | 26            | 285             | 48               | 5197           | 26             | 258              | 43                | 5678            |
| 56384           | Letm1          | 74            | 15              | 304              | 4179           | 66             | 13               | 257               | 3941            |
| 56386           | B4galt6        | 5             | 11              | 52               | 64             | 5              | 9                | 50                | 97              |
| 56388           | Cyp3a25        | 5             | 3               | 32               | 19             | 5              | 4                | 28                | 33              |
| 56389           | Stx5a          | 170           | 349             | 124              | 3120           | 185            | 351              | 118               | 2659            |
| 56390           | Sssca1         | 47            | 122             | 1419             | 372            | 47             | 132              | 849               | 455             |
| 56392           | Shoc2          | 149           | 71              | 151              | 738            | 103            | 45               | 110               | 348             |
| 56397           | Morf4l2        | 76            | 2207            | 1790             | 1754           | 85             | 2158             | 1620              | 1378            |
| 56398           | 500003o03r     | 190           | 1244            | 1241             | 1524           | 168            | 986              | 916               | 925             |
| 56399           | Akap8          | 334           | 928             | 1084             | 10399          | 318            | 780              | 950               | 10395           |
| 56401           | Lepre1         | 11            | 5               | 27               | 152            | 10             | 3                | 26                | 86              |
| 56403           | Syncrip        | 320           | 292             | 577              | 7344           | 306            | 143              | 537               | 7187            |
| 56404           | Trip4          | 38            | 170             | 58               | 806            | 38             | 141              | 50                | 588             |
| 56405           | Dusp14         | 22            | 3               | 25               | 42             | 19             | 3                | 24                | 56              |
| 56406           | Ncoa6          | 140           | 1387            | 75               | 1283           | 109            | 909              | 70                | 650             |
| 56407           | Trpc4ap        | 311           | 4851            | 1199             | 1703           | 226            | 3760             | 799               | 962             |
| 56409           | Nudt3          | 115           | 385             | 34               | 20492          | 111            | 423              | 26                | 16893           |
| 56410           | Cbln3          | 8             | 5               | 28               | 25             | 8              | 4                | 23                | 31              |
| 56417           | Adar           | 172           | 465             | 656              | 1559           | 185            | 334              | 623               | 1484            |
| 56419           | Diap3          | 11            | 6               | 46               | 79             | 13             | 11               | 52                | 123             |
| 56420           | Ppp4c          | 148           | 1677            | 2781             | 12669          | 130            | 1841             | 2035              | 9745            |
| 56421           | Pfkip          | 144           | 433             | 219              | 4220           | 88             | 318              | 132               | 2209            |
| 56422           | Hbs1l          | 173           | 810             | 1166             | 4039           | 121            | 495              | 765               | 1941            |
| 56424           | Stub1          | 162           | 1445            | 257              | 1704           | 161            | 1294             | 189               | 1542            |
| 56426           | Pdcd10         | 66            | 1585            | 363              | 4893           | 67             | 1387             | 351               | 5970            |
| 56427           | Tubd1          | 38            | 175             | 102              | 823            | 30             | 164              | 100               | 821             |
| 56428           | Mtch2          | 72            | 347             | 221              | 1622           | 85             | 434              | 238               | 1425            |
| 56429           | Dpt            | 4             | 2               | 47               | 75             | 4              | 3                | 44                | 77              |
| 56431           | Dstn           | 15            | 28              | 25               | 512            | 24             | 68               | 26                | 818             |
| 56433           | Vps29          | 85            | 836             | 382              | 1920           | 97             | 946              | 447               | 2154            |
| 56436           | Adrm1          | 151           | 570             | 368              | 1046           | 132            | 473              | 283               | 890             |
| 56437           | Rrad           | 50            | 249             | 172              | 1003           | 38             | 161              | 103               | 570             |
| 56438           | Rbx1           | 129           | 3039            | 2727             | 12469          | 125            | 3512             | 2764              | 10985           |
| 56440           | Snx1           | 86            | 2603            | 337              | 1080           | 106            | 3074             | 399               | 900             |
| 56441           | Nat6           | 24            | 48              | 32               | 198            | 30             | 49               | 34                | 237             |
| 56443           | Arpc1a         | 81            | 366             | 366              | 1235           | 78             | 355              | 311               | 1332            |
| 56444           | Actr10         | 145           | 2303            | 1277             | 17002          | 103            | 1619             | 904               | 10883           |
| 56445           | Dnaja2         | 168           | 693             | 118              | 3450           | 155            | 636              | 109               | 2391            |
| 56447           | Copz1          | 149           | 981             | 95               | 10390          | 161            | 1077             | 82                | 10869           |
| 56448           | Cyp2d22        | 64            | 23              | 367              | 154            | 39             | 10               | 154               | 118             |
| 56449           | Csda           | 44            | 4               | 87               | 270            | 106            | 21               | 258               | 748             |
| 56451           | Suclg1         | 106           | 1416            | 360              | 2202           | 103            | 1467             | 367               | 1356            |
| 56452           | Orc6l          | 41            | 497             | 285              | 2178           | 50             | 546              | 286               | 2004            |
| 56453           | Mbtips1        | 295           | 2754            | 184              | 671            | 234            | 2176             | 134               | 491             |
| 56456           | Actl6a         | 96            | 281             | 311              | 795            | 101            | 315              | 320               | 755             |
| 56457           | Clptm1         | 268           | 383             | 116              | 358            | 275            | 549              | 117               | 329             |
| 56458           | Foxo1          | 396           | 4045            | 828              | 1123           | 276            | 1832             | 504               | 631             |
| 56460           | Pkp3           | 60            | 2476            | 444              | 758            | 49             | 1190             | 229               | 413             |

| NCBI<br>Gene ID | Gene<br>Symbol | Affy.<br>CD4+ | Agilent<br>CD4+ | Illumina<br>CD4+ | Nimbl.<br>CD4+ | Affy.<br>CD19+ | Agilent<br>CD19+ | Illumina<br>CD19+ | Nimbl.<br>CD19+ |
|-----------------|----------------|---------------|-----------------|------------------|----------------|----------------|------------------|-------------------|-----------------|
| 56462           | Mtch1          | 99            | 1688            | 1286             | 318            | 159            | 3297             | 2046              | 423             |
| 56464           | Ctsf           | 7             | 44              | 33               | 68             | 7              | 38               | 29                | 18              |
| 56468           | Socs5          | 66            | 49              | 147              | 62             | 104            | 135              | 309               | 98              |
| 56469           | Pias1          | 188           | 572             | 648              | 3657           | 201            | 665              | 698               | 3776            |
| 56470           | Rgs19          | 130           | 601             | 342              | 1420           | 156            | 663              | 322               | 1297            |
| 56471           | Stmn4          | 16            | 35              | 25               | 20             | 18             | 35               | 26                | 24              |
| 56473           | Fads2          | 7             | 52              | 36               | 31             | 7              | 36               | 33                | 29              |
| 56480           | Tbk1           | 98            | 322             | 1782             | 1094           | 98             | 400              | 1693              | 1061            |
| 56485           | Slc2a5         | 6             | 2               | 32               | 172            | 7              | 3                | 29                | 149             |
| 56486           | Gabarap        | 409           | 429             | 1220             | 15651          | 577            | 555              | 1617              | 17815           |
| 56488           | Nxt1           | 76            | 428             | 58               | 3987           | 70             | 484              | 57                | 4696            |
| 56489           | Ikbke          | 458           | 743             | 999              | 7290           | 30             | 41               | 71                | 326             |
| 56491           | Vapb           | 80            | 528             | 165              | 2110           | 80             | 424              | 128               | 1159            |
| 56492           | Cldn18         | 12            | 4               | 27               | 30             | 11             | 4                | 29                | 27              |
| 56494           | Gosr2          | 65            | 613             | 271              | 1612           | 60             | 598              | 258               | 1249            |
| 56495           | Asna1          | 165           | 46              | 297              | 547            | 207            | 51               | 324               | 561             |
| 56501           | Elf4           | 251           | 46              | 29               | 65             | 224            | 34               | 21                | 53              |
| 56505           | Ruvbl1         | 89            | 1371            | 336              | 4038           | 105            | 1870             | 401               | 4282            |
| 56506           | Cib2           | 16            | 6               | 29               | 60             | 15             | 7                | 50                | 445             |
| 56508           | Ragef4         | 240           | 11              | 24               | 2289           | 124            | 5                | 24                | 802             |
| 56513           | Pard6a         | 14            | 82              | 84               | 295            | 14             | 94               | 106               | 301             |
| 56515           | Rnf138         | 104           | 385             | 181              | 5375           | 62             | 219              | 123               | 3452            |
| 56516           | Rbms2          | 44            | 143             | 362              | 394            | 49             | 182              | 495               | 349             |
| 56520           | Nme4           | 14            | 114             | 118              | 683            | 9              | 25               | 34                | 156             |
| 56522           | Papolb         | 5             | 3               | 23               | 26             | 5              | 3                | 20                | 26              |
| 56523           | Pmfbp1         | 6             | 14              | 21               | 46             | 6              | 15               | 22                | 59              |
| 56524           | Mpp6           | 59            | 477             | 108              | 4767           | 55             | 366              | 92                | 4055            |
| 56526           | 6-Sep          | 282           | 1303            | 1068             | 21014          | 214            | 934              | 934               | 17164           |
| 56527           | Mast1          | 9             | 25              | 39               | 91             | 9              | 36               | 42                | 243             |
| 56530           | Tmem4          | 40            | 809             | 312              | 9190           | 33             | 610              | 257               | 6621            |
| 56531           | Ylpm1          | 124           | 372             | 286              | 4040           | 106            | 213              | 218               | 2211            |
| 56532           | Ripk3          | 57            | 553             | 248              | 1101           | 73             | 728              | 310               | 1421            |
| 56533           | Rgs17          | 5             | 5               | 31               | 29             | 5              | 4                | 29                | 89              |
| 56534           | Hspb3          | 9             | 3               | 28               | 48             | 9              | 5                | 29                | 145             |
| 56535           | Pex3           | 64            | 89              | 152              | 2129           | 61             | 64               | 119               | 1727            |
| 56538           | Klk11          | 8             | 20              | 26               | 181            | 8              | 16               | 28                | 136             |
| 56541           | Habp4          | 46            | 109             | 75               | 1770           | 36             | 69               | 48                | 2850            |
| 56542           | Ick            | 32            | 57              | 182              | 281            | 20             | 41               | 83                | 136             |
| 56543           | Kcnd3          | 9             | 20              | 30               | 29             | 9              | 17               | 38                | 33              |
| 56546           | Sec1           | 18            | 16              | 30               | 269            | 16             | 12               | 28                | 90              |
| 56550           | Ube2d2         | 469           | 740             | 1970             | 7204           | 431            | 495              | 1827              | 5932            |
| 56551           | Txn2           | 150           | 1430            | 251              | 1528           | 149            | 1384             | 233               | 2042            |
| 56552           | V2r1b          | 8             | 2               | 35               | 30             | 8              | 3                | 34                | 28              |
| 56612           | Pfdn5          | 112           | 19076           | 3528             | 1959           | 137            | 23776            | 3942              | 2889            |
| 56613           | Rps6ka4        | 47            | 376             | 175              | 176            | 34             | 364              | 138               | 159             |
| 56615           | Mgst1          | 4             | 5               | 20               | 17             | 5              | 125              | 100               | 692             |
| 56622           | Adam21         | 5             | 15              | 31               | 26             | 5              | 12               | 33                | 30              |
| 56626           | Poll           | 19            | 446             | 278              | 284            | 21             | 580              | 319               | 324             |
| 56629           | Dnase2b        | 5             | 5               | 49               | 36             | 5              | 3                | 44                | 47              |
| 56632           | Sphk2          | 84            | 554             | 558              | 153            | 73             | 536              | 456               | 145             |
| 56636           | Fgf21          | 7             | 2               | 21               | 37             | 6              | 4                | 22                | 34              |

| NCBI<br>Gene ID | Gene<br>Symbol | Affy.<br>CD4+ | Agilent<br>CD4+ | Illumina<br>CD4+ | Nimbl.<br>CD4+ | Affy.<br>CD19+ | Agilent<br>CD19+ | Illumina<br>CD19+ | Nimbl.<br>CD19+ |
|-----------------|----------------|---------------|-----------------|------------------|----------------|----------------|------------------|-------------------|-----------------|
| 56637           | Gsk3b          | 212           | 50              | 269              | 11522          | 166            | 32               | 180               | 7649            |
| 56640           | Klk4           | 12            | 113             | 24               | 17             | 11             | 179              | 25                | 24              |
| 56642           | Ankrd2         | 11            | 17              | 20               | 56             | 9              | 15               | 20                | 46              |
| 56643           | Slc15a1        | 6             | 2               | 27               | 42             | 6              | 3                | 29                | 38              |
| 56690           | Mlycd          | 29            | 732             | 405              | 1477           | 26             | 780              | 441               | 1656            |
| 56691           | Dnajb8         | 12            | 9               | 29               | 50             | 14             | 6                | 26                | 45              |
| 56692           | Map2k1ip1      | 137           | 2232            | 18               | 2050           | 154            | 2025             | 19                | 2233            |
| 56693           | Crtap          | 19            | 127             | 65               | 428            | 18             | 134              | 56                | 444             |
| 56696           | Gpr132         | 144           | 13              | 58               | 70             | 58             | 6                | 33                | 43              |
| 56697           | Akap10         | 164           | 244             | 223              | 1644           | 166            | 190              | 212               | 1499            |
| 56699           | Cdc42ep4       | 18            | 44              | 79               | 327            | 16             | 49               | 69                | 264             |
| 56700           | 610031j06r     | 103           | 489             | 734              | 2728           | 123            | 563              | 787               | 2570            |
| 56702           | Hist1h1b       | 77            | 31              | 31               | 133            | 173            | 56               | 34                | 140             |
| 56703           | Pigo           | 49            | 233             | 396              | 505            | 56             | 187              | 360               | 391             |
| 56705           | Ranbp9         | 271           | 646             | 237              | 764            | 112            | 214              | 104               | 305             |
| 56706           | Ccn1           | 314           | 791             | 612              | 7211           | 310            | 529              | 482               | 5576            |
| 56709           | Dnajb12        | 54            | 392             | 111              | 181            | 55             | 418              | 111               | 201             |
| 56711           | Plag1          | 9             | 4               | 32               | 56             | 7              | 3                | 32                | 45              |
| 56715           | Rabgef1        | 66            | 209             | 611              | 211            | 91             | 393              | 998               | 276             |
| 56716           | Gbl            | 40            | 819             | 519              | 108            | 45             | 917              | 502               | 63              |
| 56717           | Frap1          | 69            | 159             | 117              | 187            | 76             | 100              | 135               | 216             |
| 56720           | Tdo2           | 5             | 16              | 21               | 63             | 6              | 14               | 27                | 103             |
| 56722           | Litaf          | 29            | 124             | 174              | 483            | 39             | 407              | 425               | 1337            |
| 56726           | Sh3bgrl        | 61            | 108             | 125              | 1000           | 203            | 411              | 394               | 2864            |
| 56734           | Tulp2          | 8             | 2               | 34               | 131            | 7              | 3                | 37                | 135             |
| 56736           | Rnf14          | 90            | 649             | 55               | 222            | 86             | 521              | 58                | 297             |
| 56737           | Alg2           | 80            | 111             | 293              | 79             | 52             | 84               | 242               | 83              |
| 56738           | Mocs1          | 37            | 179             | 320              | 63             | 31             | 182              | 223               | 65              |
| 56741           | Nope           | 7             | 2               | 51               | 28             | 7              | 3                | 42                | 20              |
| 56744           | Cxcl4          | 4             | 2               | 25               | 31             | 5              | 3                | 17                | 39              |
| 56745           | C1qtnf1        | 10            | 16              | 27               | 35             | 10             | 6                | 26                | 41              |
| 56746           | Tex101         | 6             | 12              | 24               | 48             | 7              | 10               | 23                | 66              |
| 56749           | Dhodh          | 32            | 253             | 446              | 994            | 29             | 249              | 409               | 915             |
| 56752           | Aldh9a1        | 116           | 448             | 27               | 8292           | 107            | 315              | 26                | 4699            |
| 56753           | Tacstd2        | 6             | 4               | 24               | 38             | 8              | 59               | 357               | 63              |
| 56758           | Mbnl1          | 964           | 4579            | 6232             | 10259          | 706            | 2069             | 4124              | 8450            |
| 56773           | Chst5          | 13            | 9               | 25               | 41             | 13             | 11               | 24                | 42              |
| 56774           | Slc6a14        | 4             | 23              | 21               | 35             | 4              | 33               | 21                | 34              |
| 56784           | Garnl1         | 118           | 202             | 44               | 349            | 123            | 152              | 54                | 341             |
| 56787           | Ascl3          | 11            | 21              | 41               | 318            | 8              | 16               | 26                | 99              |
| 56788           | Scube2         | 16            | 15              | 27               | 64             | 16             | 7                | 27                | 56              |
| 56791           | Ube2l6         | 12            | 16              | 34               | 102            | 16             | 40               | 49                | 208             |
| 56792           | Ai586015       | 54            | 208             | 190              | 888            | 238            | 846              | 692               | 2344            |
| 56805           | Zbtb33         | 80            | 202             | 30               | 36             | 84             | 262              | 31                | 56              |
| 56807           | Scamp5         | 9             | 9               | 35               | 17             | 11             | 18               | 29                | 18              |
| 56808           | Cacna2d2       | 8             | 343             | 75               | 195            | 9              | 269              | 46                | 220             |
| 56809           | Gmeb1          | 53            | 587             | 35               | 1057           | 56             | 575              | 33                | 1013            |
| 56811           | Dkk2           | 7             | 2               | 24               | 17             | 7              | 3                | 24                | 20              |
| 56812           | Dnajb10        | 18            | 208             | 266              | 3324           | 17             | 199              | 221               | 2730            |
| 56835           | Ctsr           | 5             | 7               | 35               | 22             | 6              | 6                | 31                | 22              |
| 56838           | Ccl28          | 6             | 11              | 24               | 29             | 6              | 12               | 29                | 16              |

| NCBI<br>Gene ID | Gene<br>Symbol | Affy.<br>CD4+ | Agilent<br>CD4+ | Illumina<br>CD4+ | Nimbl.<br>CD4+ | Affy.<br>CD19+ | Agilent<br>CD19+ | Illumina<br>CD19+ | Nimbl.<br>CD19+ |
|-----------------|----------------|---------------|-----------------|------------------|----------------|----------------|------------------|-------------------|-----------------|
| 56839           | Lgi1           | 5             | 3               | 21               | 89             | 5              | 6                | 19                | 102             |
| 56843           | Trpm5          | 6             | 2               | 25               | 40             | 7              | 9                | 44                | 37              |
| 56844           | Tssc4          | 15            | 530             | 87               | 285            | 16             | 701              | 81                | 286             |
| 56846           | Apba2bp        | 12            | 14              | 23               | 64             | 12             | 21               | 22                | 77              |
| 56847           | Aldh1a3        | 10            | 3               | 27               | 44             | 11             | 3                | 28                | 53              |
| 56856           | Insm2          | 9             | 18              | 22               | 57             | 9              | 17               | 22                | 49              |
| 56857           | Slc37a2        | 16            | 26              | 32               | 161            | 65             | 260              | 35                | 342             |
| 56858           | Olfr749        | 4             | 24              | 20               | 15             | 4              | 16               | 20                | 17              |
| 56860           | Olfr690        | 7             | 14              | 19               | 15             | 8              | 10               | 21                | 14              |
| 56861           | Olfr480        | 4             | 2               | 23               | 18             | 4              | 3                | 18                | 27              |
| 56863           | Cldn9          | 12            | 51              | 42               | 18             | 11             | 69               | 40                | 15              |
| 56868           | Psg23          | 4             | 2               | 26               | 19             | 5              | 5                | 19                | 20              |
| 56869           | Zfp109         | 26            | 2               | 22               | 24             | 22             | 3                | 23                | 27              |
| 56872           | Svs7           | 4             | 2               | 20               | 20             | 4              | 3                | 24                | 22              |
| 56873           | Lmbr1          | 10            | 15              | 26               | 372            | 7              | 13               | 25                | 69              |
| 56874           | Rnf32          | 19            | 248             | 41               | 223            | 6              | 10               | 30                | 56              |
| 56876           | Nelf           | 17            | 233             | 111              | 188            | 25             | 749              | 260               | 579             |
| 56878           | Rbms1          | 131           | 2166            | 767              | 5734           | 84             | 1238             | 419               | 3371            |
| 57014           | Htr3b          | 9             | 2               | 23               | 58             | 9              | 3                | 24                | 25              |
| 57028           | Pdpx           | 23            | 400             | 371              | 84             | 15             | 250              | 175               | 64              |
| 57080           | Gtf2ird1       | 30            | 321             | 81               | 362            | 7              | 12               | 30                | 117             |
| 57138           | Slc12a5        | 9             | 24              | 19               | 30             | 9              | 33               | 19                | 41              |
| 57170           | Dolpp1         | 34            | 523             | 415              | 406            | 32             | 546              | 363               | 446             |
| 57246           | Tbx20          | 6             | 4               | 33               | 23             | 5              | 3                | 31                | 31              |
| 57247           | Zfp276         | 24            | 342             | 240              | 616            | 25             | 378              | 208               | 2365            |
| 57248           | Ly6i           | 6             | 40              | 22               | 197            | 6              | 61               | 23                | 186             |
| 57249           | Gabrq          | 4             | 2               | 25               | 69             | 4              | 3                | 22                | 100             |
| 57250           | Olfr653        | 5             | 5               | 38               | 18             | 5              | 11               | 35                | 19              |
| 57251           | Olfr870        | 5             | 27              | 27               | 14             | 4              | 50               | 32                | 19              |
| 57252           | Tas2r105       | 4             | 2               | 28               | 12             | 4              | 5                | 26                | 14              |
| 57253           | Tas2r108       | 6             | 2               | 21               | 17             | 6              | 3                | 26                | 21              |
| 57254           | Tas2r119       | 5             | 2               | 24               | 15             | 6              | 3                | 19                | 14              |
| 57255           | Cldn13         | 5             | 14              | 32               | 33             | 5              | 8                | 32                | 29              |
| 57256           | Prss21         | 7             | 3               | 34               | 74             | 9              | 3                | 32                | 96              |
| 57257           | Vav3           | 34            | 89              | 124              | 644            | 31             | 56               | 122               | 461             |
| 57258           | Xpo4           | 116           | 23              | 44               | 291            | 103            | 21               | 32                | 318             |
| 57259           | Tob2           | 49            | 649             | 223              | 301            | 47             | 738              | 208               | 286             |
| 57260           | Ltb4r2         | 19            | 12              | 73               | 33             | 17             | 8                | 69                | 36              |
| 57261           | Brd4           | 122           | 634             | 2722             | 663            | 108            | 482              | 2128              | 523             |
| 57262           | Retnla         | 4             | 2               | 29               | 123            | 5              | 4                | 38                | 168             |
| 57263           | Retnlb         | 5             | 2               | 24               | 25             | 4              | 4                | 26                | 17              |
| 57264           | Retn           | 8             | 7               | 28               | 75             | 9              | 4                | 26                | 128             |
| 57265           | Fzd2           | 7             | 6               | 69               | 64             | 6              | 4                | 67                | 59              |
| 57266           | Cxcl14         | 7             | 5               | 20               | 46             | 8              | 7                | 27                | 42              |
| 57267           | Apba3          | 65            | 154             | 330              | 339            | 64             | 136              | 243               | 338             |
| 57269           | Olfr1507       | 5             | 23              | 26               | 153            | 4              | 34               | 27                | 105             |
| 57270           | Olfr1508       | 7             | 7               | 17               | 36             | 6              | 7                | 18                | 32              |
| 57271           | Olfr1509       | 4             | 24              | 31               | 19             | 4              | 22               | 26                | 18              |
| 57272           | Olfr140        | 7             | 3               | 22               | 72             | 7              | 3                | 26                | 65              |
| 57274           | Slc16a8        | 11            | 21              | 28               | 39             | 10             | 21               | 24                | 46              |
| 57279           | Slc25a20       | 44            | 51              | 20               | 3888           | 43             | 64               | 22                | 3349            |



| NCBI<br>Gene ID | Gene<br>Symbol | Affy.<br>CD4+ | Agilent<br>CD4+ | Illumina<br>CD4+ | Nimbl.<br>CD4+ | Affy.<br>CD19+ | Agilent<br>CD19+ | Illumina<br>CD19+ | Nimbl.<br>CD19+ |
|-----------------|----------------|---------------|-----------------|------------------|----------------|----------------|------------------|-------------------|-----------------|
| 57294           | Rps27          | 2828          | 125130          | 14508            | 29855          | 2769           | 157544           | 13163             | 33062           |
| 57295           | Icmt           | 48            | 230             | 576              | 499            | 57             | 391              | 971               | 704             |
| 57296           | Psmc8          | 127           | 394             | 1707             | 9404           | 145            | 421              | 1967              | 10013           |
| 57312           | Mrps31         | 43            | 391             | 316              | 2932           | 37             | 383              | 291               | 2592            |
| 57314           | Th1l           | 36            | 449             | 180              | 868            | 57             | 670              | 247               | 1485            |
| 57316           | C1d            | 16            | 119             | 36               | 552            | 17             | 106              | 37                | 644             |
| 57319           | Smpdl3a        | 78            | 1233            | 935              | 5352           | 29             | 405              | 313               | 1938            |
| 57320           | Park7          | 350           | 4155            | 3706             | 15566          | 292            | 3777             | 2896              | 10362           |
| 57321           | Terf2ip        | 28            | 188             | 373              | 888            | 25             | 196              | 276               | 701             |
| 57329           | Otor           | 7             | 15              | 22               | 102            | 7              | 8                | 21                | 87              |
| 57330           | Perq1          | 65            | 339             | 459              | 1516           | 72             | 482              | 444               | 1522            |
| 57339           | Jph1           | 10            | 13              | 50               | 42             | 9              | 26               | 51                | 30              |
| 57340           | Jph3           | 15            | 15              | 24               | 97             | 18             | 13               | 26                | 84              |
| 57342           | Parva          | 8             | 7               | 57               | 90             | 7              | 6                | 37                | 98              |
| 57344           | As3mt          | 11            | 59              | 31               | 240            | 25             | 288              | 62                | 472             |
| 57357           | Srd5a2l        | 68            | 338             | 348              | 1252           | 80             | 328              | 327               | 1160            |
| 57370           | B4galt3        | 39            | 357             | 95               | 2296           | 50             | 437              | 102               | 2687            |
| 57376           | Smarce1        | 205           | 1131            | 221              | 10328          | 222            | 1502             | 227               | 10517           |
| 57377           | Gcs1           | 61            | 2838            | 1120             | 4050           | 54             | 2626             | 1010              | 3365            |
| 57385           | P2ry4          | 7             | 3               | 20               | 15             | 7              | 3                | 21                | 14              |
| 57390           | Psors1c2       | 7             | 47              | 44               | 49             | 7              | 33               | 45                | 33              |
| 57394           | Tmem27         | 4             | 2               | 22               | 23             | 5              | 3                | 23                | 22              |
| 57423           | Atp5j2         | 272           | 3425            | 6384             | 14926          | 211            | 2582             | 5464              | 13741           |
| 57429           | Sult5a1        | 6             | 15              | 25               | 65             | 6              | 19               | 23                | 53              |
| 57430           | Sult3a1        | 4             | 4               | 34               | 17             | 4              | 10               | 32                | 17              |
| 57431           | Dnajc4         | 38            | 787             | 279              | 530            | 42             | 674              | 235               | 342             |
| 57434           | Xrcc2          | 7             | 10              | 40               | 108            | 9              | 20               | 50                | 203             |
| 57435           | S3-12          | 20            | 32              | 30               | 61             | 16             | 35               | 29                | 94              |
| 57436           | Gabarapl1      | 9             | 162             | 44               | 1630           | 9              | 266              | 53                | 2379            |
| 57437           | Golga7         | 107           | 324             | 19               | 9111           | 113            | 390              | 21                | 9150            |
| 57440           | Ehd3           | 130           | 753             | 382              | 4847           | 28             | 111              | 67                | 993             |
| 57441           | Gmnn           | 8             | 624             | 33               | 1987           | 10             | 1237             | 42                | 3332            |
| 57442           | Kcne3          | 6             | 4               | 22               | 30             | 6              | 3                | 21                | 43              |
| 57443           | Fbxo3          | 122           | 188             | 97               | 2075           | 126            | 138              | 95                | 1392            |
| 57444           | Isg20          | 48            | 280             | 153              | 723            | 49             | 300              | 152               | 794             |
| 57738           | Slc15a2        | 34            | 206             | 477              | 3641           | 27             | 122              | 363               | 2605            |
| 57740           | Stk32c         | 6             | 2               | 35               | 26             | 5              | 3                | 41                | 37              |
| 57742           | Abhd1          | 29            | 164             | 130              | 331            | 35             | 283              | 212               | 479             |
| 57743           | Sec61a2        | 38            | 11              | 167              | 934            | 38             | 20               | 209               | 1186            |
| 57746           | Piwil2         | 11            | 6               | 36               | 47             | 11             | 3                | 25                | 33              |
| 57748           | Jmy            | 39            | 21              | 39               | 101            | 20             | 9                | 36                | 87              |
| 57749           | Piwil1         | 8             | 3               | 23               | 28             | 8              | 3                | 21                | 29              |
| 57750           | Wdr12          | 75            | 256             | 18               | 2125           | 46             | 239              | 21                | 1437            |
| 57751           | Rnf25          | 35            | 11              | 72               | 863            | 49             | 7                | 77                | 979             |
| 57752           | Tacc2          | 22            | 534             | 289              | 531            | 15             | 54               | 37                | 43              |
| 57755           | Dnajb7         | 4             | 3               | 19               | 55             | 4              | 3                | 23                | 64              |
| 57756           | Fhl5           | 6             | 6               | 17               | 28             | 5              | 4                | 19                | 24              |
| 57764           | Ntn4           | 17            | 4               | 27               | 49             | 18             | 19               | 25                | 22              |
| 57765           | Tbx21          | 11            | 69              | 23               | 50             | 12             | 91               | 30                | 48              |
| 57773           | Wdr4           | 29            | 531             | 40               | 421            | 29             | 523              | 32                | 489             |
| 57775           | Usp29          | 4             | 22              | 41               | 17             | 4              | 22               | 38                | 23              |

| NCBI Gene ID | Gene Symbol | Affy. CD4+ | Agilent CD4+ | Illumina CD4+ | Nimbl. CD4+ | Affy. CD19+ | Agilent CD19+ | Illumina CD19+ | Nimbl. CD19+ |
|--------------|-------------|------------|--------------|---------------|-------------|-------------|---------------|----------------|--------------|
| 57776        | Ttyh1       | 13         | 20           | 31            | 45          | 13          | 22            | 30             | 60           |
| 57778        | Fmnl1       | 399        | 257          | 126           | 185         | 306         | 177           | 92             | 168          |
| 57780        | Fxyd7       | 22         | 6            | 24            | 43          | 24          | 4             | 26             | 50           |
| 57781        | Cd200r1     | 14         | 76           | 20            | 401         | 5           | 4             | 17             | 27           |
| 57783        | Tnip1       | 110        | 1528         | 1263          | 1324        | 70          | 865           | 707            | 977          |
| 57784        | Bin3        | 67         | 834          | 133           | 3438        | 93          | 1150          | 118            | 3377         |
| 57808        | Rpl35a      | 1954       | 17923        | 9116          | 40038       | 1576        | 13726         | 8060           | 42929        |
| 57810        | Cdon        | 103        | 30           | 87            | 134         | 36          | 5             | 37             | 27           |
| 57811        | Rgr         | 6          | 2            | 32            | 19          | 6           | 3             | 33             | 21           |
| 57813        | Tk2         | 61         | 379          | 1788          | 1271        | 83          | 510           | 2257           | 1502         |
| 57814        | Kcne4       | 6          | 2            | 32            | 47          | 5           | 3             | 36             | 37           |
| 57815        | Spata5      | 128        | 247          | 25            | 186         | 134         | 334           | 26             | 159          |
| 57816        | Tesc        | 144        | 1878         | 468           | 4113        | 40          | 38            | 33             | 116          |
| 57837        | Eral1       | 47         | 150          | 229           | 962         | 46          | 192           | 223            | 1142         |
| 57869        | Adck2       | 21         | 214          | 26            | 1109        | 20          | 214           | 24             | 818          |
| 57875        | Angptl4     | 14         | 220          | 69            | 312         | 13          | 88            | 33             | 132          |
| 57890        | Il17re      | 9          | 14           | 51            | 47          | 9           | 9             | 39             | 76           |
| 57908        | Zfp318      | 52         | 119          | 249           | 300         | 474         | 712           | 1471           | 1490         |
| 57911        | Gsdm1       | 7          | 12           | 29            | 24          | 7           | 13            | 27             | 30           |
| 57912        | Cdc42se1    | 285        | 3437         | 244           | 1647        | 233         | 2569          | 193            | 1235         |
| 57913        | Lrdd        | 18         | 304          | 33            | 29          | 21          | 233           | 43             | 29           |
| 57915        | Tbc1d1      | 193        | 148          | 635           | 266         | 199         | 131           | 804            | 290          |
| 57916        | Tnfrsf13b   | 36         | 267          | 409           | 1275        | 158         | 2753          | 2964           | 7082         |
| 58170        | Accn5       | 9          | 2            | 24            | 59          | 8           | 3             | 21             | 118          |
| 58172        | Sertad2     | 62         | 260          | 162           | 2105        | 47          | 217           | 113            | 1367         |
| 58175        | Rgs20       | 5          | 8            | 30            | 43          | 5           | 9             | 29             | 39           |
| 58176        | Rhbg        | 9          | 4            | 32            | 43          | 9           | 7             | 30             | 46           |
| 58178        | Sorcs1      | 6          | 6            | 45            | 32          | 6           | 7             | 41             | 33           |
| 58179        | Klrc3       | 3          | 3            | 23            | 14          | 3           | 3             | 27             | 17           |
| 58180        | Hic2        | 24         | 62           | 77            | 202         | 22          | 56            | 48             | 139          |
| 58181        | Il20        | 5          | 2            | 20            | 41          | 5           | 5             | 23             | 43           |
| 58184        | Rqcd1       | 74         | 29           | 261           | 2724        | 56          | 28            | 235            | 2196         |
| 58186        | Rad18       | 67         | 62           | 39            | 785         | 51          | 35            | 40             | 591          |
| 58187        | Cldn10      | 16         | 46           | 247           | 136         | 17          | 74            | 410            | 133          |
| 58193        | Extl2       | 12         | 37           | 131           | 1043        | 11          | 34            | 112            | 844          |
| 58194        | Sh3kbp1     | 388        | 3125         | 2940          | 7885        | 265         | 1609          | 1581           | 4091         |
| 58198        | Sall1       | 13         | 33           | 36            | 45          | 11          | 18            | 34             | 55           |
| 58200        | Ppp1r1a     | 17         | 10           | 29            | 71          | 18          | 8             | 34             | 71           |
| 58202        | 730008l03r  | 76         | 3620         | 182           | 2728        | 92          | 3979          | 172            | 2690         |
| 58203        | Zbp1        | 156        | 589          | 32            | 1807        | 66          | 263           | 36             | 715          |
| 58205        | Pdcd1lg2    | 7          | 5            | 39            | 163         | 14          | 28            | 94             | 1311         |
| 58207        | Slc43a3     | 16         | 40           | 51            | 122         | 29          | 70            | 127            | 218          |
| 58208        | Bcl11b      | 379        | 2442         | 3796          | 1120        | 15          | 34            | 36             | 55           |
| 58212        | 900083i11r  | 8          | 17           | 27            | 26          | 8           | 13            | 23             | 30           |
| 58214        | Cst10       | 5          | 12           | 30            | 16          | 5           | 9             | 26             | 19           |
| 58217        | Trem1       | 7          | 12           | 29            | 34          | 7           | 13            | 38             | 43           |
| 58218        | Trem3       | 5          | 2            | 24            | 20          | 7           | 3             | 25             | 22           |
| 58220        | Pard6b      | 22         | 36           | 27            | 334         | 19          | 21            | 25             | 243          |
| 58222        | Rab37       | 119        | 485          | 300           | 816         | 30          | 41            | 45             | 53           |
| 58223        | Mmp19       | 6          | 13           | 38            | 74          | 5           | 19            | 43             | 84           |
| 58226        | Cacna1h     | 12         | 23           | 18            | 103         | 20          | 20            | 64             | 127          |

| NCBI Gene ID | Gene Symbol | Affy. CD4+ | Agilent CD4+ | Illumina CD4+ | Nimbl. CD4+ | Affy. CD19+ | Agilent CD19+ | Illumina CD19+ | Nimbl. CD19+ |
|--------------|-------------|------------|--------------|---------------|-------------|-------------|---------------|----------------|--------------|
| 58229        | Ab041550    | 9          | 19           | 21            | 28          | 9           | 23            | 21             | 27           |
| 58230        | Rnf8        | 57         | 158          | 279           | 247         | 63          | 187           | 287            | 278          |
| 58231        | Stk4        | 692        | 926          | 596           | 1348        | 452         | 398           | 351            | 897          |
| 58233        | Dnaja4      | 31         | 76           | 99            | 531         | 20          | 10            | 31             | 25           |
| 58234        | Shank3      | 10         | 8            | 38            | 48          | 11          | 6             | 36             | 39           |
| 58235        | Pvr11       | 12         | 63           | 37            | 67          | 12          | 117           | 42             | 58           |
| 58238        | 830059i20r  | 24         | 6            | 21            | 41          | 28          | 4             | 29             | 41           |
| 58239        | Dexi        | 52         | 1121         | 256           | 955         | 84          | 1496          | 275            | 985          |
| 58240        | Hs1bp3      | 26         | 50           | 26            | 73          | 28          | 54            | 29             | 74           |
| 58242        | Nudt11      | 4          | 5            | 22            | 15          | 5           | 3             | 21             | 18           |
| 58243        | Nap1l5      | 22         | 2            | 26            | 91          | 20          | 3             | 25             | 31           |
| 58244        | Stx6        | 109        | 442          | 95            | 1417        | 72          | 220           | 60             | 999          |
| 58245        | Gpr180      | 31         | 358          | 73            | 857         | 25          | 157           | 56             | 662          |
| 58246        | Slc35b4     | 55         | 140          | 509           | 4710        | 52          | 133           | 523            | 5765         |
| 58249        | Fibp        | 50         | 1090         | 1449          | 654         | 57          | 1323          | 1823           | 704          |
| 58250        | Chst11      | 8          | 78           | 27            | 16          | 12          | 59            | 26             | 27           |
| 58251        | Ddc8        | 17         | 2            | 29            | 61          | 14          | 3             | 27             | 50           |
| 58518        | Cts6        | 4          | 3            | 21            | 20          | 4           | 3             | 20             | 25           |
| 58799        | Crbn        | 182        | 220          | 423           | 2087        | 160         | 161           | 391            | 1689         |
| 58800        | Trpm7       | 153        | 605          | 122           | 14568       | 105         | 280           | 98             | 11541        |
| 58801        | Pmaip1      | 20         | 23           | 26            | 58          | 45          | 233           | 28             | 347          |
| 58802        | Kcnmb4      | 26         | 521          | 171           | 3437        | 10          | 25            | 39             | 161          |
| 58803        | Pga5        | 6          | 23           | 22            | 37          | 7           | 17            | 23             | 45           |
| 58804        | Cdc42ep5    | 5          | 21           | 24            | 30          | 6           | 18            | 21             | 35           |
| 58807        | Slco1c1     | 6          | 5            | 23            | 25          | 6           | 6             | 26             | 24           |
| 58810        | Akr1a4      | 258        | 1489         | 1220          | 4768        | 258         | 1124          | 1084           | 4235         |
| 58859        | Efemp2      | 29         | 16           | 38            | 225         | 27          | 5             | 32             | 129          |
| 58860        | Adamdec1    | 6          | 2            | 27            | 18          | 6           | 12            | 30             | 21           |
| 58861        | Cysltr1     | 4          | 3            | 22            | 28          | 5           | 4             | 21             | 41           |
| 58865        | Tdh         | 5          | 27           | 20            | 72          | 5           | 34            | 26             | 46           |
| 58866        | Treh        | 7          | 2            | 22            | 21          | 7           | 3             | 24             | 23           |
| 58867        | Syngn4      | 13         | 31           | 40            | 50          | 12          | 22            | 37             | 77           |
| 58869        | Pex2        | 7          | 63           | 22            | 39          | 7           | 32            | 21             | 39           |
| 58875        | Hibadh      | 130        | 876          | 1414          | 3833        | 152         | 1036          | 1635           | 3528         |
| 58887        | Repin1      | 14         | 22           | 24            | 91          | 19          | 93            | 37             | 220          |
| 58909        | 430015b01r  | 5          | 2            | 25            | 17          | 5           | 5             | 27             | 18           |
| 58988        | Rps6kb2     | 74         | 62           | 35            | 437         | 75          | 58            | 41             | 410          |
| 58991        | Ghrl        | 33         | 27           | 29            | 88          | 32          | 19            | 31             | 83           |
| 58992        | F12         | 10         | 11           | 30            | 89          | 10          | 14            | 30             | 86           |
| 58994        | Smpd3       | 7          | 23           | 22            | 56          | 9           | 17            | 46             | 57           |
| 58998        | Pvr13       | 6          | 5            | 25            | 32          | 5           | 3             | 29             | 40           |
| 59001        | Pole3       | 27         | 191          | 65            | 336         | 29          | 315           | 100            | 496          |
| 59002        | Wdr8        | 70         | 277          | 142           | 719         | 74          | 303           | 146            | 807          |
| 59003        | Maea        | 122        | 707          | 241           | 3443        | 149         | 712           | 320            | 3786         |
| 59004        | Pias4       | 60         | 32           | 131           | 81          | 77          | 37            | 137            | 102          |
| 59006        | Myoz2       | 5          | 4            | 31            | 20          | 4           | 6             | 32             | 30           |
| 59007        | Ngly1       | 108        | 374          | 34            | 588         | 59          | 194           | 33             | 281          |
| 59008        | Anapc5      | 237        | 5504         | 3352          | 10967       | 217         | 5154          | 2646           | 8611         |
| 59010        | Sqrdl       | 8          | 134          | 82            | 1389        | 5           | 7             | 31             | 22           |
| 59011        | Myoz1       | 6          | 10           | 26            | 87          | 7           | 11            | 27             | 103          |
| 59012        | Moxd1       | 5          | 14           | 27            | 21          | 5           | 12            | 24             | 20           |

| NCBI<br>Gene ID | Gene<br>Symbol | Affy.<br>CD4+ | Agilent<br>CD4+ | Illumina<br>CD4+ | Nimbl.<br>CD4+ | Affy.<br>CD19+ | Agilent<br>CD19+ | Illumina<br>CD19+ | Nimbl.<br>CD19+ |
|-----------------|----------------|---------------|-----------------|------------------|----------------|----------------|------------------|-------------------|-----------------|
| 59013           | Hnrph1         | 655           | 3107            | 980              | 16225          | 862            | 2631             | 1220              | 17318           |
| 59014           | Rrs1           | 61            | 351             | 32               | 136            | 57             | 326              | 29                | 139             |
| 59015           | Nup160         | 182           | 142             | 280              | 666            | 309            | 244              | 531               | 977             |
| 59016           | Thap11         | 33            | 587             | 627              | 459            | 34             | 525              | 555               | 370             |
| 59020           | Pdzk1          | 9             | 18              | 31               | 64             | 8              | 16               | 35                | 65              |
| 59021           | Rab2           | 144           | 1218            | 1102             | 13976          | 103            | 779              | 887               | 10291           |
| 59022           | Edf1           | 219           | 2980            | 3947             | 5655           | 238            | 3271             | 3597              | 5947            |
| 59025           | Usp14          | 60            | 114             | 156              | 2345           | 60             | 108              | 144               | 2311            |
| 59027           | Pbef1          | 54            | 162             | 42               | 4615           | 79             | 313              | 47                | 5931            |
| 59028           | Rcl1           | 53            | 363             | 599              | 344            | 47             | 311              | 524               | 278             |
| 59029           | Psmid14        | 124           | 1252            | 566              | 9954           | 131            | 1123             | 526               | 7746            |
| 59030           | Mkks           | 40            | 115             | 145              | 1232           | 35             | 104              | 122               | 1110            |
| 59031           | Chst12         | 106           | 229             | 68               | 89             | 106            | 193              | 69                | 158             |
| 59036           | Dact1          | 7             | 5               | 27               | 33             | 6              | 6                | 25                | 35              |
| 59038           | Pxmp4          | 37            | 282             | 136              | 1533           | 27             | 189              | 111               | 1413            |
| 59040           | Rhot1          | 59            | 266             | 809              | 3383           | 63             | 209              | 828               | 2611            |
| 59041           | Stk25          | 117           | 2404            | 202              | 2363           | 107            | 2044             | 135               | 1464            |
| 59042           | Cope           | 156           | 1150            | 1077             | 6171           | 161            | 1282             | 960               | 7332            |
| 59043           | Wsb2           | 78            | 68              | 488              | 2496           | 66             | 59               | 393               | 2336            |
| 59044           | Rnf130         | 54            | 405             | 260              | 2941           | 228            | 1671             | 1041              | 9202            |
| 59045           | Stard3         | 82            | 1478            | 324              | 1134           | 68             | 1042             | 233               | 862             |
| 59046           | Arpp19         | 75            | 1003            | 158              | 174            | 93             | 811              | 238               | 223             |
| 59047           | Pnkp           | 64            | 1042            | 978              | 2532           | 67             | 1082             | 987               | 3353            |
| 59049           | Slc22a17       | 19            | 57              | 37               | 226            | 18             | 49               | 37                | 136             |
| 59050           | 730427n09r     | 675           | 8840            | 5693             | 3420           | 577            | 7267             | 4502              | 3635            |
| 59053           | Brp16          | 38            | 352             | 629              | 1039           | 32             | 380              | 654               | 1357            |
| 59054           | Mrps30         | 47            | 512             | 1365             | 2872           | 41             | 501              | 1425              | 2669            |
| 59056           | Evc            | 10            | 5               | 25               | 24             | 10             | 6                | 25                | 23              |
| 59057           | Zfp191         | 68            | 56              | 46               | 269            | 68             | 57               | 50                | 199             |
| 59058           | Bhlhb5         | 5             | 3               | 25               | 18             | 5              | 3                | 28                | 22              |
| 59069           | Tpm3           | 131           | 7754            | 2252             | 17099          | 153            | 5761             | 1784              | 15630           |
| 59079           | Erbp2ip        | 435           | 1071            | 226              | 3602           | 397            | 908              | 210               | 2732            |
| 59083           | Fetub          | 5             | 11              | 37               | 137            | 5              | 8                | 39                | 109             |
| 59090           | Midn           | 200           | 1121            | 2313             | 96             | 216            | 1339             | 2202              | 70              |
| 59091           | Jph2           | 11            | 15              | 34               | 51             | 11             | 15               | 32                | 49              |
| 59092           | Pcbp4          | 16            | 276             | 268              | 358            | 14             | 159              | 110               | 290             |
| 59093           | Pcbp3          | 25            | 9               | 37               | 77             | 22             | 3                | 30                | 54              |
| 59095           | Fxyd6          | 35            | 25              | 29               | 31             | 35             | 23               | 28                | 45              |
| 59125           | Nek7           | 150           | 605             | 40               | 3930           | 189            | 681              | 49                | 4058            |
| 59126           | Nek6           | 10            | 26              | 26               | 118            | 11             | 27               | 25                | 169             |
| 59287           | Ncstn          | 140           | 12              | 709              | 25             | 156            | 9                | 629               | 28              |
| 59288           | Dctn5          | 187           | 629             | 1057             | 760            | 224            | 775              | 1172              | 755             |
| 59289           | Ccbp2          | 13            | 7               | 35               | 44             | 30             | 397              | 331               | 810             |
| 59290           | Gpa33          | 7             | 6               | 22               | 87             | 7              | 4                | 20                | 127             |
| 59308           | Emcn           | 4             | 3               | 34               | 22             | 5              | 7                | 36                | 21              |
| 59310           | Mylc2pl        | 9             | 4               | 28               | 68             | 9              | 7                | 26                | 49              |
| 60315           | Myg1           | 65            | 250             | 305              | 1251           | 67             | 244              | 293               | 1133            |
| 60321           | Wbp11          | 88            | 589             | 1065             | 188            | 94             | 468              | 854               | 124             |
| 60322           | Chst7          | 6             | 2               | 25               | 97             | 7              | 18               | 40                | 82              |
| 60344           | Fign           | 4             | 2               | 23               | 38             | 4              | 3                | 26                | 50              |
| 60345           | Nrip2          | 12            | 24              | 36               | 66             | 14             | 23               | 28                | 95              |

| NCBI<br>Gene ID | Gene<br>Symbol | Affy.<br>CD4+ | Agilent<br>CD4+ | Illumina<br>CD4+ | Nimbl.<br>CD4+ | Affy.<br>CD19+ | Agilent<br>CD19+ | Illumina<br>CD19+ | Nimbl.<br>CD19+ |
|-----------------|----------------|---------------|-----------------|------------------|----------------|----------------|------------------|-------------------|-----------------|
| 60361           | Ms4a4b         | 486           | 11227           | 24               | 27861          | 12             | 252              | 23                | 1755            |
| 60363           | Cldn15         | 8             | 22              | 27               | 77             | 7              | 22               | 32                | 49              |
| 60364           | Donson         | 71            | 462             | 175              | 962            | 66             | 324              | 166               | 722             |
| 60367           | Il1rapl2       | 4             | 46              | 21               | 41             | 4              | 32               | 24                | 43              |
| 60406           | Sap30          | 9             | 31              | 189              | 1024           | 13             | 99               | 410               | 2073            |
| 60409           | Trappc4        | 56            | 1112            | 300              | 417            | 68             | 1027             | 326               | 456             |
| 60425           | Doc2g          | 24            | 82              | 31               | 106            | 28             | 156              | 31                | 171             |
| 60441           | Mrpl38         | 71            | 411             | 632              | 1639           | 78             | 473              | 645               | 1589            |
| 60455           | Tmem8          | 56            | 320             | 129              | 542            | 41             | 178              | 80                | 336             |
| 60504           | Il21r          | 438           | 475             | 284              | 7174           | 514            | 528              | 247               | 6218            |
| 60505           | Il21           | 5             | 3               | 24               | 67             | 4              | 3                | 20                | 30              |
| 60507           | Qtrt1          | 56            | 786             | 178              | 3115           | 41             | 544              | 116               | 1837            |
| 60510           | Syt9           | 8             | 2               | 39               | 20             | 8              | 4                | 37                | 26              |
| 60527           | Fads3          | 10            | 3               | 30               | 101            | 12             | 4                | 30                | 129             |
| 60530           | Figl1          | 8             | 13              | 45               | 62             | 14             | 59               | 137               | 193             |
| 60532           | Wtap           | 461           | 1108            | 37               | 4158           | 417            | 1236             | 41                | 4123            |
| 60534           | Fancg          | 31            | 305             | 36               | 980            | 32             | 375              | 41                | 1321            |
| 60594           | Capn12         | 9             | 4               | 23               | 26             | 8              | 7                | 26                | 23              |
| 60595           | Actn4          | 298           | 1390            | 362              | 9072           | 218            | 1036             | 226               | 6425            |
| 60596           | Gucy1a3        | 10            | 20              | 73               | 72             | 9              | 12               | 29                | 33              |
| 60597           | Mapk8ip2       | 8             | 17              | 40               | 70             | 8              | 27               | 43                | 47              |
| 60599           | Trp53inp1      | 470           | 2340            | 1192             | 14067          | 366            | 1379             | 883               | 9464            |
| 60611           | Foxj2          | 130           | 736             | 489              | 1357           | 154            | 1013             | 423               | 1149            |
| 60613           | Kcnq4          | 7             | 11              | 26               | 132            | 7              | 6                | 27                | 103             |
| 63828           | Fn3k           | 6             | 35              | 45               | 330            | 7              | 15               | 43                | 56              |
| 63857           | Bcmo1          | 8             | 2               | 26               | 51             | 7              | 3                | 29                | 39              |
| 63859           | Impg1          | 5             | 3               | 24               | 49             | 5              | 3                | 22                | 34              |
| 63872           | Zfp296         | 15            | 39              | 38               | 54             | 43             | 809              | 149               | 661             |
| 63873           | Trpv4          | 10            | 61              | 36               | 170            | 8              | 51               | 43                | 129             |
| 63913           | Niban          | 10            | 9               | 48               | 333            | 7              | 3                | 28                | 45              |
| 63953           | Dusp10         | 157           | 672             | 89               | 1261           | 55             | 238              | 48                | 299             |
| 63954           | Rbp7           | 5             | 3               | 33               | 45             | 6              | 3                | 25                | 35              |
| 63955           | Cables1        | 5             | 8               | 23               | 44             | 5              | 19               | 34                | 35              |
| 63958           | Ube4b          | 189           | 212             | 1236             | 7814           | 171            | 176              | 948               | 5511            |
| 63959           | Slc29a1        | 57            | 366             | 157              | 2139           | 45             | 251              | 95                | 1537            |
| 63985           | Gmfb           | 179           | 809             | 33               | 1340           | 199            | 713              | 32                | 1104            |
| 63986           | Gmfg           | 622           | 5697            | 2244             | 10540          | 478            | 5100             | 1661              | 9217            |
| 63993           | Slc5a7         | 6             | 2               | 22               | 18             | 6              | 3                | 26                | 23              |
| 64008           | Aqp9           | 7             | 10              | 66               | 28             | 6              | 10               | 26                | 17              |
| 64009           | Syne1          | 44            | 141             | 58               | 1160           | 30             | 99               | 50                | 615             |
| 64010           | Sav1           | 96            | 384             | 411              | 1699           | 136            | 401              | 492               | 1781            |
| 64011           | Nrgn           | 17            | 17              | 26               | 81             | 21             | 100              | 39                | 99              |
| 64050           | Yeats4         | 87            | 838             | 325              | 2976           | 151            | 1211             | 408               | 3823            |
| 64051           | Sv2a           | 11            | 8               | 118              | 81             | 9              | 7                | 56                | 98              |
| 64058           | Perp           | 10            | 4               | 31               | 25             | 10             | 3                | 35                | 41              |
| 64059           | Oxct2a         | 15            | 8               | 21               | 40             | 15             | 5                | 25                | 52              |
| 64074           | Smoc2          | 10            | 5               | 28               | 29             | 11             | 5                | 25                | 22              |
| 64075           | Smoc1          | 8             | 10              | 27               | 34             | 7              | 6                | 31                | 44              |
| 64082           | Popdc2         | 6             | 34              | 25               | 41             | 6              | 27               | 21                | 29              |
| 64085           | Clstn2         | 6             | 7               | 24               | 16             | 6              | 4                | 19                | 17              |
| 64095           | Gpr35          | 10            | 6               | 24               | 66             | 11             | 3                | 27                | 57              |

| NCBI Gene ID | Gene Symbol | Affy. CD4+ | Agilent CD4+ | Illumina CD4+ | Nimbl. CD4+ | Affy. CD19+ | Agilent CD19+ | Illumina CD19+ | Nimbl. CD19+ |
|--------------|-------------|------------|--------------|---------------|-------------|-------------|---------------|----------------|--------------|
| 64099        | Parvg       | 202        | 455          | 440           | 3323        | 276         | 807           | 594            | 3889         |
| 64103        | Tnmd        | 6          | 2            | 36            | 22          | 7           | 3             | 34             | 18           |
| 64113        | Moap1       | 35         | 386          | 54            | 782         | 39          | 329           | 48             | 676          |
| 64136        | Sdf2l1      | 34         | 166          | 53            | 305         | 61          | 694           | 73             | 482          |
| 64138        | Ctsz        | 105        | 513          | 169           | 1822        | 718         | 5636          | 1106           | 10212        |
| 64139        | Ctsm        | 4          | 6            | 20            | 80          | 5           | 5             | 22             | 135          |
| 64143        | Ralb        | 23         | 328          | 70            | 253         | 22          | 422           | 68             | 194          |
| 64144        | Mllt1       | 77         | 189          | 30            | 104         | 70          | 156           | 29             | 178          |
| 64164        | lfrg15      | 125        | 418          | 46            | 7058        | 106         | 331           | 37             | 4707         |
| 64176        | Sv2b        | 6          | 5            | 25            | 21          | 6           | 11            | 45             | 23           |
| 64177        | Trpv6       | 9          | 3            | 34            | 92          | 7           | 4             | 34             | 90           |
| 64209        | Herpud1     | 208        | 1055         | 189           | 3928        | 304         | 1578          | 259            | 5296         |
| 64213        | St7         | 16         | 155          | 69            | 192         | 13          | 113           | 52             | 127          |
| 64214        | Rgs18       | 5          | 2            | 23            | 18          | 22          | 100           | 32             | 1398         |
| 64242        | Ngb         | 11         | 120          | 43            | 47          | 10          | 112           | 40             | 39           |
| 64290        | Foxb1       | 6          | 4            | 50            | 28          | 7           | 6             | 31             | 46           |
| 64291        | Osbp1a      | 6          | 20           | 31            | 55          | 7           | 12            | 27             | 354          |
| 64292        | Ptges       | 6          | 6            | 28            | 28          | 6           | 6             | 26             | 44           |
| 64293        | Stk32b      | 6          | 2            | 21            | 17          | 6           | 3             | 20             | 22           |
| 64294        | Itm2c       | 115        | 406          | 1480          | 1448        | 35          | 68            | 166            | 257          |
| 64296        | Abhd8       | 93         | 961          | 1608          | 574         | 24          | 152           | 223            | 72           |
| 64297        | Gprc5b      | 19         | 183          | 230           | 334         | 9           | 6             | 26             | 101          |
| 64337        | Gng13       | 9          | 3            | 23            | 227         | 10          | 6             | 27             | 318          |
| 64339        | Fndc4       | 8          | 2            | 31            | 54          | 6           | 6             | 25             | 59           |
| 64340        | Dhx38       | 80         | 167          | 789           | 509         | 87          | 171           | 812            | 506          |
| 64378        | Gpr88       | 9          | 3            | 31            | 16          | 7           | 4             | 29             | 17           |
| 64379        | Irx6        | 12         | 24           | 28            | 69          | 11          | 25            | 26             | 101          |
| 64380        | Ms4a4c      | 92         | 177          | 21            | 10220       | 813         | 1582          | 23             | 24648        |
| 64381        | Ms4a8a      | 13         | 2            | 20            | 83          | 12          | 3             | 21             | 115          |
| 64383        | Sirt2       | 142        | 495          | 327           | 4834        | 139         | 412           | 329            | 3237         |
| 64384        | Sirt3       | 19         | 333          | 178           | 845         | 22          | 686           | 354            | 1342         |
| 64385        | Cyp4f14     | 7          | 3            | 22            | 38          | 7           | 5             | 27             | 34           |
| 64406        | Sp5         | 7          | 2            | 21            | 39          | 7           | 3             | 21             | 53           |
| 64435        | Fcamr       | 8          | 3            | 28            | 104         | 10          | 3             | 33             | 958          |
| 64436        | Inpp5e      | 64         | 169          | 41            | 2716        | 65          | 138           | 40             | 2600         |
| 64450        | Gpr85       | 5          | 2            | 53            | 51          | 5           | 3             | 50             | 55           |
| 64452        | Slc5a4a     | 4          | 2            | 31            | 268         | 5           | 3             | 27             | 267          |
| 64453        | Suhw2       | 133        | 150          | 117           | 6102        | 88          | 116           | 106            | 3040         |
| 64454        | Slc5a4b     | 7          | 14           | 35            | 37          | 5           | 8             | 29             | 28           |
| 64580        | Ndst4       | 4          | 11           | 34            | 30          | 4           | 7             | 29             | 38           |
| 64602        | Ireb2       | 120        | 441          | 264           | 421         | 143         | 434           | 327            | 461          |
| 64652        | Nisch       | 247        | 9825         | 3894          | 3029        | 195         | 8466          | 2706           | 2175         |
| 64654        | Fgf23       | 10         | 16           | 37            | 23          | 10          | 25            | 32             | 29           |
| 64655        | Mrps22      | 40         | 175          | 15            | 387         | 40          | 175           | 24             | 317          |
| 64656        | Mrps23      | 110        | 227          | 792           | 2930        | 97          | 187           | 650            | 2340         |
| 64657        | Mrps10      | 29         | 412          | 296           | 378         | 24          | 475           | 295            | 482          |
| 64658        | Mrps25      | 34         | 53           | 134           | 704         | 36          | 102           | 121            | 686          |
| 64659        | Mrps14      | 47         | 350          | 26            | 6251        | 40          | 281           | 27             | 5124         |
| 64660        | Mrps24      | 62         | 924          | 2544          | 1959        | 61          | 875           | 2376           | 2121         |
| 64661        | Krtdap      | 6          | 5            | 26            | 62          | 6           | 6             | 29             | 76           |
| 64685        | Nmi         | 144        | 2765         | 41            | 290         | 121         | 2692          | 30             | 237          |

| NCBI Gene ID | Gene Symbol | Affy. CD4+ | Agilent CD4+ | Illumina CD4+ | Nimbl. CD4+ | Affy. CD19+ | Agilent CD19+ | Illumina CD19+ | Nimbl. CD19+ |
|--------------|-------------|------------|--------------|---------------|-------------|-------------|---------------|----------------|--------------|
| 64697        | Keg1        | 6          | 5            | 22            | 23          | 6           | 7             | 24             | 18           |
| 64705        | Dpys        | 9          | 7            | 25            | 67          | 9           | 15            | 28             | 50           |
| 64706        | Scube1      | 20         | 43           | 25            | 58          | 16          | 38            | 18             | 56           |
| 64707        | Suv39h2     | 11         | 7            | 27            | 140         | 12          | 8             | 28             | 212          |
| 64898        | Lpin2       | 48         | 225          | 103           | 164         | 90          | 541           | 245            | 356          |
| 64899        | Lpin3       | 8          | 3            | 35            | 17          | 9           | 3             | 33             | 25           |
| 64918        | Bhmt2       | 7          | 2            | 20            | 13          | 7           | 4             | 24             | 17           |
| 64929        | Scel        | 4          | 2            | 21            | 36          | 4           | 3             | 26             | 21           |
| 64930        | Tsc1        | 82         | 133          | 134           | 140         | 86          | 114           | 144            | 154          |
| 64931        | Folr4       | 71         | 74           | 122           | 2805        | 14          | 18            | 27             | 233          |
| 64933        | Ap3m2       | 69         | 163          | 55            | 11595       | 66          | 157           | 57             | 8967         |
| 64934        | Pes1        | 87         | 756          | 192           | 607         | 123         | 1352          | 444            | 825          |
| 64945        | Cldn12      | 6          | 4            | 35            | 43          | 5           | 3             | 28             | 46           |
| 65019        | Rpl23       | 261        | 29925        | 19078         | 26001       | 234         | 22262         | 18909          | 26537        |
| 65020        | Zfp110      | 112        | 358          | 581           | 5275        | 122         | 388           | 647            | 4802         |
| 65079        | Rtn4r       | 22         | 2            | 25            | 57          | 21          | 4             | 23             | 61           |
| 65086        | Edg7        | 8          | 3            | 22            | 18          | 7           | 3             | 24             | 22           |
| 65099        | Irak1bp1    | 5          | 2            | 25            | 28          | 6           | 3             | 26             | 176          |
| 65100        | Zic5        | 18         | 2            | 25            | 31          | 19          | 3             | 24             | 40           |
| 65102        | Nif3l1      | 74         | 736          | 151           | 2047        | 54          | 437           | 91             | 1403         |
| 65103        | Arl6ip6     | 41         | 160          | 18            | 303         | 38          | 121           | 15             | 267          |
| 65105        | Arl6ip4     | 76         | 937          | 442           | 226         | 95          | 1171          | 429            | 206          |
| 65106        | Arl6ip5     | 133        | 1279         | 722           | 12607       | 71          | 624           | 306            | 5848         |
| 65107        | Lrp10       | 210        | 1133         | 4684          | 588         | 233         | 1132          | 4782           | 514          |
| 65111        | Dap3        | 63         | 3773         | 3118          | 7350        | 53          | 2575          | 2359           | 5323         |
| 65112        | Tmepai      | 48         | 26           | 35            | 114         | 32          | 10            | 36             | 72           |
| 65113        | Ndfip1      | 243        | 561          | 24            | 9319        | 170         | 255           | 25             | 4857         |
| 65114        | Vps35       | 100        | 684          | 1485          | 3041        | 106         | 593           | 1688           | 2929         |
| 65116        | Prrg2       | 11         | 54           | 47            | 249         | 11          | 91            | 51             | 288          |
| 65221        | Slc15a3     | 19         | 6            | 26            | 78          | 52          | 63            | 34             | 324          |
| 65246        | Xpo7        | 133        | 268          | 79            | 349         | 108         | 231           | 66             | 265          |
| 65247        | Asb1        | 30         | 178          | 132           | 1098        | 31          | 221           | 174            | 1249         |
| 65254        | Dpysl5      | 7          | 19           | 41            | 36          | 7           | 14            | 39             | 34           |
| 65255        | Asb4        | 5          | 3            | 30            | 51          | 5           | 3             | 29             | 32           |
| 65256        | Asb2        | 17         | 6            | 55            | 81          | 28          | 40            | 287            | 56           |
| 65257        | Asb3        | 42         | 108          | 296           | 875         | 35          | 105           | 299            | 606          |
| 65945        | Clstn1      | 23         | 174          | 36            | 842         | 19          | 57            | 30             | 367          |
| 65960        | Twsg1       | 90         | 65           | 435           | 1606        | 94          | 77            | 563            | 2023         |
| 65961        | Criz1       | 79         | 2108         | 22            | 8309        | 83          | 2517          | 19             | 7578         |
| 65962        | Slc9a3r2    | 14         | 30           | 31            | 186         | 13          | 32            | 29             | 235          |
| 65967        | Eefsec      | 189        | 281          | 168           | 1644        | 120         | 236           | 142            | 975          |
| 65969        | Cubn        | 5          | 2            | 21            | 37          | 5           | 22            | 25             | 23           |
| 65971        | 700021k02r  | 7          | 3            | 30            | 40          | 7           | 3             | 28             | 55           |
| 65972        | Ifi30       | 59         | 187          | 278           | 1198        | 647         | 1978          | 2491           | 8579         |
| 65973        | Asph        | 6          | 8            | 44            | 198         | 6           | 3             | 39             | 159          |
| 66011        | Ranbp17     | 5          | 19           | 19            | 18          | 6           | 19            | 17             | 20           |
| 66042        | Sostdc1     | 5          | 4            | 30            | 115         | 5           | 3             | 34             | 83           |
| 66043        | Atp5d       | 311        | 1485         | 1943          | 2566        | 309         | 1460          | 1676           | 2938         |
| 66046        | Ndufb5      | 78         | 183          | 464           | 4886        | 83          | 240           | 455            | 5038         |
| 66047        | Mrpl54      | 48         | 778          | 645           | 2868        | 54          | 955           | 740            | 4096         |
| 66050        | 510009b22r  | 11         | 81           | 57            | 1301        | 11          | 150           | 78             | 2103         |

| NCBI Gene ID | Gene Symbol | Affy. CD4+ | Agilent CD4+ | Illumina CD4+ | Nimbl. CD4+ | Affy. CD19+ | Agilent CD19+ | Illumina CD19+ | Nimbl. CD19+ |
|--------------|-------------|------------|--------------|---------------|-------------|-------------|---------------|----------------|--------------|
| 66052        | Sdhc        | 143        | 281          | 905           | 1520        | 123         | 273           | 717            | 1395         |
| 66053        | Ppil2       | 120        | 1072         | 282           | 3083        | 122         | 1375          | 245            | 2708         |
| 66054        | Cndp2       | 62         | 181          | 137           | 436         | 54          | 146           | 106            | 306          |
| 66055        | s10009d07r  | 54         | 3390         | 39            | 3417        | 64          | 4113          | 36             | 4098         |
| 66056        | Zfp524      | 55         | 468          | 178           | 349         | 42          | 298           | 97             | 207          |
| 66059        | Krtcap2     | 156        | 1390         | 3879          | 23408       | 161         | 1357          | 3626           | 25150        |
| 66060        | s10010o12r  | 15         | 3            | 26            | 62          | 15          | 3             | 25             | 66           |
| 66066        | Gng11       | 6          | 114          | 32            | 38          | 6           | 125           | 34             | 46           |
| 66071        | Ethe1       | 16         | 174          | 230           | 912         | 17          | 229           | 292            | 923          |
| 66072        | s10038f07r  | 90         | 507          | 384           | 1751        | 150         | 994           | 513            | 2655         |
| 66075        | Chchd3      | 138        | 1393         | 29            | 7547        | 123         | 1199          | 27             | 6898         |
| 66082        | Abhd6       | 38         | 22           | 135           | 312         | 44          | 25            | 114            | 379          |
| 66090        | Ypel3       | 200        | 1176         | 185           | 13323       | 179         | 1075          | 154            | 14047        |
| 66091        | Ndufa3      | 104        | 1007         | 2270          | 13741       | 107         | 991           | 1929           | 12505        |
| 66092        | Ghitm       | 143        | 777          | 437           | 3397        | 175         | 883           | 532            | 2933         |
| 66094        | Lsm7        | 78         | 3144         | 947           | 10005       | 77          | 4278          | 980            | 9748         |
| 66101        | Ppih        | 118        | 465          | 377           | 5077        | 192         | 567           | 411            | 5029         |
| 66102        | Cxcl16      | 5          | 54           | 31            | 781         | 5           | 48            | 31             | 1027         |
| 66105        | Ube2d3      | 914        | 1123         | 174           | 17563       | 792         | 834           | 181            | 15559        |
| 66106        | Smpx        | 4          | 9            | 23            | 29          | 4           | 4             | 23             | 43           |
| 66107        | l00001g20r  | 16         | 2            | 23            | 37          | 17          | 42            | 59             | 445          |
| 66108        | Ndufa9      | 128        | 1862         | 862           | 335         | 117         | 1881          | 734            | 314          |
| 66113        | Apoa5       | 16         | 27           | 22            | 44          | 16          | 25            | 25             | 41           |
| 66114        | Wbscr18     | 60         | 381          | 333           | 2050        | 71          | 406           | 334            | 2515         |
| 66116        | Cml1        | 11         | 147          | 138           | 1779        | 12          | 207           | 148            | 2101         |
| 66118        | l10005a23r  | 137        | 2953         | 442           | 3294        | 157         | 3545          | 509            | 3060         |
| 66119        | l10002e23r  | 36         | 365          | 733           | 35          | 37          | 428           | 843            | 50           |
| 66120        | Fkbp11      | 10         | 34           | 43            | 258         | 10          | 110           | 187            | 714          |
| 66121        | Chchd1      | 42         | 4810         | 2905          | 9471        | 52          | 6169          | 2823           | 9160         |
| 66123        | l10006o24r  | 29         | 391          | 55            | 162         | 26          | 220           | 44             | 244          |
| 66125        | Sf3b5       | 47         | 597          | 1236          | 2562        | 42          | 681           | 1342           | 3430         |
| 66128        | Mrps36      | 8          | 347          | 27            | 2771        | 8           | 429           | 25             | 4796         |
| 66131        | Tipin       | 33         | 441          | 74            | 742         | 36          | 526           | 77             | 934          |
| 66136        | Znrd1       | 25         | 707          | 1719          | 9543        | 25          | 695           | 1939           | 11370        |
| 66138        | Wbscr22     | 73         | 631          | 609           | 4362        | 83          | 972           | 714            | 4767         |
| 66141        | Ifitm3      | 5          | 49           | 37            | 112         | 7           | 45            | 61             | 344          |
| 66142        | Cox7b       | 124        | 1607         | 82            | 7464        | 129         | 1406          | 68             | 8531         |
| 66143        | Eef1e1      | 104        | 318          | 249           | 5551        | 100         | 340           | 275            | 4541         |
| 66144        | Atp6v1f     | 219        | 4460         | 2419          | 9224        | 289         | 6208          | 3028           | 11518        |
| 66152        | l10020p15r  | 44         | 3547         | 3084          | 6214        | 45          | 3785          | 2994           | 8259         |
| 66153        | Fbxo36      | 11         | 7            | 33            | 74          | 10          | 5             | 30             | 57           |
| 66154        | Tmem14c     | 86         | 459          | 1808          | 8860        | 78          | 436           | 1785           | 7068         |
| 66161        | Pop4        | 42         | 581          | 580           | 2495        | 47          | 652           | 626            | 2075         |
| 66163        | Mrpl4       | 74         | 281          | 219           | 287         | 77          | 246           | 205            | 313          |
| 66165        | Bccip       | 80         | 2383         | 1137          | 8783        | 98          | 2374          | 1230           | 7593         |
| 66166        | S100a14     | 6          | 10           | 36            | 34          | 6           | 7             | 29             | 36           |
| 66168        | Grina       | 111        | 181          | 2667          | 1309        | 104         | 148           | 2169           | 1046         |
| 66169        | Tomm7       | 197        | 2236         | 716           | 14934       | 184         | 2049          | 762            | 16105        |
| 66170        | Chchd5      | 20         | 230          | 150           | 683         | 28          | 200           | 142            | 746          |
| 66171        | Pgls        | 60         | 806          | 1472          | 1583        | 107         | 2403          | 3176           | 4035         |
| 66174        | Nudt14      | 41         | 116          | 173           | 762         | 20          | 86            | 118            | 570          |



| NCBI Gene ID | Gene Symbol | Affy. CD4+ | Agilent CD4+ | Illumina CD4+ | Nimbl. CD4+ | Affy. CD19+ | Agilent CD19+ | Illumina CD19+ | Nimbl. CD19+ |
|--------------|-------------|------------|--------------|---------------|-------------|-------------|---------------|----------------|--------------|
| 66175        | Mustn1      | 16         | 12           | 40            | 169         | 18          | 8             | 43             | 134          |
| 66177        | Ubl5        | 437        | 1656         | 2807          | 1603        | 466         | 1958          | 3166           | 2280         |
| 66181        | Nola3       | 169        | 2980         | 2161          | 12398       | 134         | 2753          | 1773           | 10565        |
| 66183        | l10032a04r  | 4          | 2            | 21            | 21          | 4           | 3             | 20             | 23           |
| 66185        | 110037f02r  | 115        | 240          | 231           | 9005        | 112         | 299           | 259            | 6668         |
| 66190        | Phca        | 9          | 38           | 130           | 1315        | 7           | 30            | 116            | 1113         |
| 66193        | 110049f12r  | 33         | 311          | 850           | 637         | 28          | 340           | 854            | 557          |
| 66194        | Pycrl       | 24         | 244          | 231           | 1885        | 25          | 351           | 257            | 2688         |
| 66196        | Myohd1      | 30         | 84           | 80            | 42          | 33          | 91            | 90             | 35           |
| 66197        | Cks2        | 8          | 248          | 33            | 1756        | 12          | 887           | 35             | 5044         |
| 66199        | Commd4      | 86         | 1124         | 1468          | 3996        | 110         | 1441          | 1587           | 4879         |
| 66200        | Commd6      | 46         | 204          | 332           | 1030        | 43          | 172           | 338            | 1279         |
| 66204        | Acyp1       | 31         | 704          | 26            | 8629        | 28          | 519           | 25             | 6994         |
| 66209        | l10054o05r  | 59         | 52           | 104           | 809         | 72          | 73            | 132            | 690          |
| 66211        | Rpl3l       | 6          | 4            | 26            | 34          | 6           | 5             | 24             | 54           |
| 66212        | Sec61b      | 69         | 4445         | 973           | 10231       | 66          | 5130          | 846            | 11937        |
| 66214        | l90002h23r  | 81         | 1783         | 1225          | 1942        | 25          | 73            | 40             | 46           |
| 66218        | Ndufb9      | 48         | 3729         | 229           | 2270        | 51          | 4359          | 207            | 2482         |
| 66220        | Zdhhc12     | 58         | 127          | 701           | 471         | 55          | 170           | 841            | 604          |
| 66222        | Serpinb1a   | 5          | 6            | 26            | 89          | 303         | 6182          | 560            | 13878        |
| 66223        | Mrpl35      | 46         | 469          | 71            | 5244        | 41          | 484           | 67             | 5340         |
| 66226        | Trappc2     | 43         | 126          | 102           | 513         | 53          | 144           | 109            | 494          |
| 66230        | Mrps28      | 40         | 1083         | 451           | 2972        | 30          | 1132          | 403            | 3000         |
| 66233        | Dmap1       | 40         | 633          | 328           | 2371        | 32          | 680           | 317            | 2459         |
| 66234        | Sc4mol      | 159        | 638          | 625           | 2479        | 112         | 362           | 352            | 1071         |
| 66235        | Eif1ay      | 75         | 1149         | 154           | 4769        | 68          | 1025          | 129            | 4513         |
| 66237        | Atp6v1g2    | 42         | 88           | 46            | 71          | 37          | 78            | 56             | 70           |
| 66240        | Kcne1l      | 8          | 2            | 25            | 39          | 9           | 3             | 26             | 36           |
| 66241        | Tmem9       | 21         | 265          | 196           | 334         | 18          | 178           | 120            | 313          |
| 66242        | Mrps16      | 153        | 3243         | 663           | 3030        | 151         | 4197          | 812            | 5083         |
| 66244        | Sdccag1     | 112        | 725          | 95            | 8462        | 124         | 853           | 95             | 8367         |
| 66245        | s00019g21r  | 52         | 183          | 115           | 230         | 57          | 164           | 92             | 231          |
| 66246        | Osgep       | 72         | 787          | 440           | 396         | 84          | 963           | 536            | 496          |
| 66248        | Alg5        | 56         | 975          | 1265          | 11445       | 41          | 751           | 951            | 8120         |
| 66251        | Arfgap3     | 22         | 91           | 46            | 77          | 23          | 81            | 49             | 80           |
| 66253        | Aig1        | 21         | 42           | 44            | 2066        | 19          | 34            | 46             | 2655         |
| 66256        | Ssr2        | 197        | 541          | 1095          | 3446        | 207         | 662           | 1155           | 2945         |
| 66257        | Nicn1       | 18         | 28           | 27            | 355         | 22          | 38            | 32             | 555          |
| 66258        | Mrps17      | 38         | 869          | 1153          | 4912        | 38          | 774           | 1147           | 5374         |
| 66262        | Ing5        | 66         | 225          | 36            | 2497        | 69          | 254           | 38             | 2477         |
| 66274        | s10012p15r  | 15         | 93           | 25            | 711         | 13          | 85            | 26             | 576          |
| 66277        | Klf15       | 18         | 9            | 38            | 35          | 15          | 12            | 31             | 38           |
| 66283        | Gkn1        | 16         | 2            | 26            | 36          | 16          | 3             | 34             | 62           |
| 66290        | Atp6v1g1    | 139        | 3360         | 29            | 23492       | 148         | 3823          | 24             | 22468        |
| 66291        | s10030n24r  | 23         | 268          | 737           | 2001        | 15          | 198           | 693            | 1808         |
| 66292        | Mrps21      | 111        | 195          | 1472          | 2161        | 132         | 204           | 1421           | 2563         |
| 66293        | s10032o08r  | 27         | 971          | 352           | 124         | 22          | 581           | 304            | 159          |
| 66294        | s10037c20r  | 26         | 121          | 236           | 119         | 31          | 136           | 281            | 159          |
| 66306        | s10012g03r  | 31         | 87           | 383           | 473         | 34          | 94            | 426            | 455          |
| 66310        | s10410m20r  | 133        | 1227         | 1445          | 149         | 124         | 1146          | 1378           | 133          |
| 66313        | Smurf2      | 168        | 136          | 113           | 1404        | 119         | 86            | 85             | 801          |

| NCBI Gene ID | Gene Symbol | Affy. CD4+ | Agilent CD4+ | Illumina CD4+ | Nimbl. CD4+ | Affy. CD19+ | Agilent CD19+ | Illumina CD19+ | Nimbl. CD19+ |
|--------------|-------------|------------|--------------|---------------|-------------|-------------|---------------|----------------|--------------|
| 66314        | Tpd52l2     | 53         | 202          | 200           | 264         | 57          | 222           | 226            | 297          |
| 66320        | Hspc171     | 49         | 1980         | 393           | 3378        | 50          | 1947          | 404            | 4028         |
| 66326        | Dnajc5b     | 5          | 8            | 31            | 26          | 5           | 4             | 33             | 27           |
| 66328        | 00010m22i   | 4          | 15           | 21            | 35          | 4           | 19            | 21             | 38           |
| 66333        | Aqp11       | 9          | 24           | 37            | 237         | 9           | 7             | 23             | 72           |
| 66335        | Atp6v1c1    | 117        | 91           | 386           | 2789        | 112         | 86            | 353            | 2086         |
| 66337        | 700025k23r  | 6          | 4            | 17            | 19          | 6           | 3             | 38             | 35           |
| 66350        | Pla2g12a    | 17         | 76           | 155           | 1358        | 19          | 123           | 186            | 1813         |
| 66352        | Blzf1       | 59         | 143          | 44            | 3035        | 63          | 162           | 38             | 3774         |
| 66353        | 310007a19r  | 6          | 6            | 85            | 148         | 5           | 3             | 45             | 104          |
| 66355        | Gmpr        | 7          | 3            | 31            | 68          | 8           | 8             | 31             | 63           |
| 66356        | 310008h09r  | 29         | 178          | 149           | 589         | 29          | 254           | 137            | 638          |
| 66359        | 310005n03r  | 56         | 820          | 687           | 9023        | 52          | 755           | 565            | 7493         |
| 66362        | Exosc3      | 41         | 493          | 30            | 2573        | 43          | 616           | 32             | 2541         |
| 66368        | Rtcd1       | 71         | 235          | 21            | 5139        | 89          | 272           | 21             | 5461         |
| 66373        | Lsm5        | 39         | 626          | 27            | 133         | 41          | 747           | 23             | 138          |
| 66374        | 310011j03r  | 41         | 120          | 103           | 1641        | 45          | 148           | 101            | 1983         |
| 66375        | Dhrs7       | 45         | 1085         | 625           | 2450        | 33          | 765           | 440            | 1782         |
| 66377        | Ndufc1      | 40         | 724          | 780           | 3045        | 45          | 720           | 841            | 4266         |
| 66379        | 310016m24i  | 90         | 3066         | 1458          | 5531        | 70          | 3151          | 1283           | 4930         |
| 66380        | Krtap3-3    | 7          | 2            | 36            | 29          | 7           | 3             | 33             | 20           |
| 66384        | Srp19       | 28         | 2006         | 117           | 6491        | 27          | 2083          | 109            | 6492         |
| 66385        | Ppp1r7      | 105        | 24           | 26            | 5216        | 113         | 28            | 27             | 5794         |
| 66387        | Nudt8       | 29         | 62           | 99            | 199         | 35          | 153           | 160            | 428          |
| 66388        | Cutc        | 20         | 191          | 153           | 434         | 34          | 555           | 328            | 1124         |
| 66394        | Nosip       | 52         | 1289         | 191           | 421         | 50          | 1490          | 169            | 507          |
| 66395        | Ahnak       | 48         | 520          | 25            | 693         | 72          | 584           | 22             | 873          |
| 66398        | Commd5      | 30         | 721          | 213           | 164         | 32          | 960           | 230            | 224          |
| 66401        | Nudt2       | 10         | 42           | 55            | 263         | 9           | 46            | 62             | 337          |
| 66402        | Sln         | 6          | 6            | 29            | 28          | 6           | 6             | 25             | 35           |
| 66403        | Asf1a       | 33         | 575          | 58            | 7446        | 34          | 658           | 66             | 6549         |
| 66407        | Mrps15      | 138        | 464          | 266           | 5511        | 135         | 382           | 250            | 6329         |
| 66408        | Aptx        | 32         | 244          | 210           | 1184        | 30          | 297           | 199            | 978          |
| 66412        | Arrdc4      | 6          | 8            | 42            | 294         | 5           | 2             | 22             | 48           |
| 66416        | Ndufa7      | 24         | 2419         | 1153          | 1941        | 28          | 2852          | 1172           | 2976         |
| 66419        | Mrpl11      | 53         | 1381         | 281           | 2374        | 62          | 1512          | 298            | 2887         |
| 66420        | Polr2e      | 80         | 2683         | 1996          | 6877        | 116         | 3996          | 2596           | 9200         |
| 66432        | Slc7a6os    | 89         | 341          | 156           | 719         | 97          | 296           | 157            | 763          |
| 66433        | Chchd7      | 87         | 660          | 518           | 5771        | 77          | 714           | 508            | 5604         |
| 66440        | Cdc26       | 43         | 501          | 61            | 2790        | 49          | 688           | 66             | 2799         |
| 66441        | 310012c16r  | 6          | 103          | 173           | 3222        | 8           | 222           | 322            | 6126         |
| 66445        | Cyc1        | 172        | 1350         | 857           | 9786        | 182         | 1468          | 825            | 7984         |
| 66446        | Exosc7      | 51         | 307          | 1933          | 9294        | 43          | 259           | 1466           | 6586         |
| 66447        | Mgst3       | 13         | 29           | 121           | 432         | 14          | 51            | 127            | 460          |
| 66448        | Mrpl20      | 52         | 1919         | 955           | 283         | 46          | 2156          | 952            | 344          |
| 66449        | Magmas      | 55         | 1572         | 276           | 6960        | 52          | 1697          | 259            | 7976         |
| 66464        | Taf12       | 50         | 487          | 635           | 2979        | 47          | 384           | 534            | 3040         |
| 66468        | 310433k01r  | 6          | 12           | 71            | 48          | 6           | 34            | 54             | 70           |
| 66471        | Anp32e      | 90         | 133          | 274           | 985         | 103         | 141           | 293            | 1282         |
| 66473        | Ctrb1       | 10         | 76           | 23            | 53          | 10          | 82            | 29             | 29           |
| 66475        | Rps23       | 1051       | 125435       | 5589          | 40014       | 846         | 117452        | 4120           | 44230        |

| NCBI Gene ID | Gene Symbol | Affy. CD4+ | Agilent CD4+ | Illumina CD4+ | Nimbl. CD4+ | Affy. CD19+ | Agilent CD19+ | Illumina CD19+ | Nimbl. CD19+ |
|--------------|-------------|------------|--------------|---------------|-------------|-------------|---------------|----------------|--------------|
| 66477        | Usmg5       | 101        | 1852         | 127           | 5855        | 84          | 1372          | 103            | 6061         |
| 66480        | Rpl15       | 1136       | 16739        | 14135         | 42026       | 955         | 13786         | 11929          | 44822        |
| 66481        | Rps21       | 984        | 45299        | 15474         | 34960       | 819         | 38095         | 15221          | 35716        |
| 66483        | Rpl36a1     | 768        | 2032         | 78            | 26804       | 674         | 1999          | 71             | 24583        |
| 66489        | Rpl35       | 767        | 28370        | 13723         | 40364       | 711         | 31248         | 13211          | 45227        |
| 66492        | Zmat2       | 100        | 602          | 31            | 4997        | 119         | 790           | 33             | 5505         |
| 66493        | Mrpl51      | 83         | 912          | 1030          | 4345        | 103         | 1087          | 1143           | 5093         |
| 66495        | Ndufb3      | 17         | 1898         | 741           | 13866       | 19          | 1507          | 629            | 14542        |
| 66497        | 510528e23r  | 18         | 157          | 103           | 701         | 16          | 118           | 79             | 640          |
| 66500        | Slc30a7     | 213        | 90           | 236           | 1589        | 141         | 60            | 147            | 788          |
| 66501        | 700029h14r  | 10         | 2            | 25            | 89          | 7           | 3             | 27             | 94           |
| 66505        | Zmynd11     | 195        | 294          | 473           | 12351       | 204         | 335           | 454            | 14653        |
| 66513        | Map3k7ip1   | 47         | 1432         | 865           | 86          | 32          | 1194          | 653            | 67           |
| 66514        | Asrgl1      | 41         | 235          | 22            | 1509        | 37          | 217           | 21             | 1472         |
| 66515        | Cul7        | 15         | 156          | 127           | 396         | 15          | 214           | 164            | 342          |
| 66520        | 610001j05r  | 50         | 380          | 54            | 1684        | 53          | 467           | 67             | 1417         |
| 66521        | Rwdd1       | 67         | 505          | 52            | 3829        | 55          | 486           | 74             | 3733         |
| 66522        | Pgpep1      | 25         | 45           | 63            | 85          | 32          | 125           | 221            | 697          |
| 66525        | Timm50      | 61         | 377          | 255           | 1152        | 75          | 426           | 275            | 1253         |
| 66526        | 210012g02r  | 77         | 343          | 163           | 754         | 80          | 396           | 200            | 1179         |
| 66530        | Ubx1        | 65         | 1661         | 507           | 2342        | 60          | 1596          | 427            | 1894         |
| 66531        | 310061c15r  | 24         | 221          | 207           | 514         | 19          | 290           | 181            | 516          |
| 66532        | 210417d09r  | 12         | 27           | 28            | 65          | 12          | 28            | 30             | 79           |
| 66552        | 310106g01r  | 235        | 207          | 225           | 1454        | 287         | 195           | 251            | 1726         |
| 66556        | Drap1       | 130        | 475          | 1870          | 1754        | 122         | 458           | 1554           | 1764         |
| 66557        | Bpil1       | 9          | 8            | 34            | 76          | 11          | 8             | 36             | 121          |
| 66559        | Metap1      | 44         | 120          | 178           | 825         | 40          | 85            | 147            | 883          |
| 66561        | 310042e22r  | 5          | 12           | 29            | 61          | 4           | 6             | 25             | 16           |
| 66576        | Uqcrh       | 335        | 16822        | 4350          | 25588       | 287         | 15949         | 3660           | 23578        |
| 66578        | 510039c10r  | 82         | 208          | 35            | 14691       | 82          | 202           | 30             | 13293        |
| 66583        | Exosc1      | 95         | 436          | 841           | 4124        | 91          | 362           | 735            | 3063         |
| 66587        | Fastk       | 94         | 291          | 230           | 681         | 100         | 311           | 180            | 604          |
| 66589        | Ube2v1      | 172        | 1209         | 162           | 423         | 166         | 879           | 123            | 381          |
| 66591        | Mad2l1bp    | 44         | 1476         | 279           | 2611        | 43          | 1232          | 233            | 2339         |
| 66592        | Stoml2      | 49         | 266          | 32            | 1356        | 58          | 333           | 27             | 1592         |
| 66593        | Diablo      | 43         | 402          | 680           | 5490        | 46          | 505           | 775            | 6780         |
| 66594        | Uqcr        | 34         | 1960         | 735           | 3582        | 36          | 2482          | 755            | 5186         |
| 66597        | Trim13      | 10         | 48           | 64            | 75          | 5           | 7             | 62             | 29           |
| 66603        | Sip1        | 26         | 82           | 94            | 293         | 29          | 121           | 101            | 334          |
| 66607        | Ms4a4d      | 6          | 64           | 23            | 133         | 6           | 630           | 26             | 44           |
| 66609        | Cryz1       | 41         | 222          | 160           | 1369        | 59          | 409           | 275            | 1661         |
| 66610        | Abi3        | 81         | 330          | 971           | 72          | 204         | 830           | 2138           | 139          |
| 66611        | Ribc1       | 7          | 47           | 34            | 549         | 7           | 51            | 43             | 523          |
| 66612        | Ormdl3      | 61         | 152          | 791           | 1801        | 60          | 86            | 630            | 1769         |
| 66616        | Snx9        | 16         | 13           | 26            | 65          | 165         | 377           | 128            | 634          |
| 66618        | 10209m04r   | 35         | 781          | 773           | 2510        | 36          | 925           | 883            | 3040         |
| 66629        | Golph3      | 130        | 299          | 29            | 1108        | 96          | 199           | 28             | 920          |
| 66634        | Mcm8        | 7          | 22           | 38            | 31          | 9           | 59            | 38             | 36           |
| 66642        | Ctnnbl1     | 86         | 750          | 433           | 1841        | 66          | 600           | 312            | 1401         |
| 66643        | Lix1        | 5          | 6            | 49            | 526         | 5           | 8             | 42             | 211          |
| 66645        | Pspc1       | 141        | 143          | 33            | 1457        | 151         | 152           | 32             | 1743         |

| NCBI Gene ID | Gene Symbol | Affy. CD4+ | Agilent CD4+ | Illumina CD4+ | Nimbl. CD4+ | Affy. CD19+ | Agilent CD19+ | Illumina CD19+ | Nimbl. CD19+ |
|--------------|-------------|------------|--------------|---------------|-------------|-------------|---------------|----------------|--------------|
| 66646        | Rpe         | 99         | 268          | 20            | 1166        | 89          | 243           | 21             | 1044         |
| 66647        | Ndn12       | 67         | 204          | 637           | 1627        | 68          | 250           | 525            | 1415         |
| 66653        | Brf2        | 15         | 55           | 107           | 263         | 12          | 52            | 110            | 303          |
| 66654        | Tex12       | 4          | 6            | 26            | 23          | 4           | 4             | 22             | 36           |
| 66656        | Eef1d       | 78         | 6117         | 4357          | 21515       | 69          | 6175          | 3718           | 24589        |
| 66659        | Acp6        | 75         | 750          | 435           | 739         | 64          | 586           | 354            | 502          |
| 66661        | Srp72       | 167        | 564          | 241           | 5375        | 164         | 501           | 238            | 4573         |
| 66663        | Ube1dc1     | 89         | 554          | 591           | 162         | 103         | 588           | 582            | 88           |
| 66671        | Ccnh        | 73         | 575          | 571           | 3235        | 72          | 591           | 570            | 3411         |
| 66673        | Sorcs3      | 6          | 3            | 25            | 59          | 6           | 3             | 33             | 80           |
| 66679        | Rae1        | 82         | 668          | 924           | 2627        | 75          | 475           | 756            | 1817         |
| 66680        | U30401d17r  | 136        | 505          | 142           | 4412        | 142         | 527           | 141            | 4116         |
| 66681        | Pgm1        | 77         | 27           | 20            | 524         | 56          | 19            | 22             | 330          |
| 66682        | Trappc5     | 55         | 443          | 129           | 4061        | 81          | 912           | 198            | 5041         |
| 66684        | Tceal8      | 6          | 66           | 28            | 138         | 6           | 65            | 27             | 199          |
| 66686        | Dcbld1      | 5          | 9            | 25            | 42          | 8           | 30            | 147            | 957          |
| 66687        | Tbc1d15     | 92         | 544          | 22            | 3907        | 74          | 360           | 19             | 2615         |
| 66694        | Uqcrfs1     | 56         | 1398         | 33            | 9730        | 52          | 1375          | 31             | 9805         |
| 66695        | Aspn        | 4          | 3            | 25            | 16          | 5           | 3             | 26             | 16           |
| 66700        | Vps24       | 125        | 102          | 584           | 2160        | 98          | 102           | 560            | 1312         |
| 66705        | Dnase1l2    | 20         | 70           | 87            | 266         | 17          | 75            | 69             | 207          |
| 66706        | U33401h18r  | 45         | 150          | 654           | 146         | 49          | 245           | 850            | 218          |
| 66708        | Krtap3-2    | 8          | 2            | 28            | 17          | 8           | 3             | 24             | 15           |
| 66711        | Sbds        | 96         | 690          | 579           | 2907        | 105         | 738           | 561            | 3606         |
| 66713        | Actr2       | 854        | 2170         | 25            | 10381       | 915         | 2495          | 28             | 8646         |
| 66715        | U921515j06r | 7          | 8            | 20            | 123         | 6           | 6             | 22             | 21           |
| 66716        | U921510h08r | 5          | 2            | 30            | 64          | 6           | 3             | 33             | 65           |
| 66720        | Klhl10      | 7          | 5            | 43            | 123         | 6           | 3             | 33             | 105          |
| 66722        | Spag16      | 4          | 4            | 27            | 26          | 4           | 8             | 26             | 31           |
| 66733        | Kcng4       | 9          | 11           | 34            | 27          | 9           | 9             | 33             | 41           |
| 66734        | Map1lc3a    | 21         | 31           | 77            | 82          | 26          | 35            | 70             | 111          |
| 66740        | U931417e11r | 5          | 4            | 18            | 42          | 5           | 3             | 20             | 35           |
| 66748        | U933404m02r | 5          | 3            | 31            | 84          | 4           | 4             | 30             | 86           |
| 66753        | U933407n01r | 61         | 466          | 365           | 226         | 59          | 370           | 304            | 284          |
| 66757        | Deadc1      | 31         | 65           | 117           | 587         | 37          | 81            | 138            | 669          |
| 66761        | U933417a18r | 5          | 4            | 30            | 40          | 6           | 3             | 25             | 50           |
| 66765        | U933411k16r | 9          | 39           | 26            | 109         | 9           | 32            | 21             | 97           |
| 66772        | Asb17       | 5          | 2            | 26            | 53          | 5           | 3             | 25             | 51           |
| 66786        | Olfir701    | 4          | 4            | 22            | 25          | 4           | 7             | 22             | 34           |
| 66787        | U933433p14r | 39         | 92           | 90            | 2560        | 40          | 83            | 91             | 3280         |
| 66790        | Grtp1       | 6          | 4            | 24            | 75          | 5           | 3             | 27             | 69           |
| 66797        | Cntnap2     | 6          | 10           | 32            | 116         | 8           | 12            | 33             | 199          |
| 66801        | Prkrip1     | 32         | 794          | 92            | 1198        | 34          | 1050          | 104            | 1278         |
| 66808        | U930624g23r | 18         | 3            | 33            | 28          | 18          | 3             | 41             | 37           |
| 66810        | Rbm22       | 169        | 308          | 21            | 703         | 140         | 268           | 20             | 625          |
| 66813        | Bcl2l14     | 8          | 26           | 31            | 211         | 8           | 30            | 33             | 275          |
| 66821        | Bcs1l       | 31         | 138          | 276           | 480         | 35          | 161           | 353            | 691          |
| 66822        | Fbxo25      | 51         | 625          | 400           | 3544        | 38          | 415           | 252            | 2822         |
| 66824        | Pycard      | 75         | 3675         | 76            | 2511        | 40          | 1832          | 47             | 1004         |
| 66826        | Taz         | 66         | 597          | 162           | 5482        | 102         | 941           | 206            | 6203         |
| 66827        | Ttc1        | 67         | 52           | 465           | 2657        | 56          | 57            | 408            | 2387         |

| NCBI Gene ID | Gene Symbol | Affy. CD4+ | Agilent CD4+ | Illumina CD4+ | Nimbl. CD4+ | Affy. CD19+ | Agilent CD19+ | Illumina CD19+ | Nimbl. CD19+ |
|--------------|-------------|------------|--------------|---------------|-------------|-------------|---------------|----------------|--------------|
| 66830        | Btbd14b     | 108        | 159          | 56            | 156         | 139         | 167           | 45             | 212          |
| 66834        | Them2       | 41         | 2127         | 91            | 4666        | 32          | 1999          | 85             | 3490         |
| 66841        | Etfdh       | 66         | 381          | 168           | 1719        | 73          | 444           | 169            | 1050         |
| 66844        | Ormdl2      | 19         | 110          | 26            | 2100        | 23          | 173           | 26             | 3225         |
| 66845        | Mrpl33      | 57         | 4416         | 2274          | 5494        | 33          | 2832          | 1336           | 4274         |
| 66847        | Hint3       | 36         | 351          | 229           | 354         | 38          | 360           | 206            | 326          |
| 66849        | Ppp1r2      | 55         | 120          | 358           | 1601        | 67          | 142           | 486            | 2020         |
| 66853        | Pnpla2      | 41         | 579          | 769           | 816         | 44          | 578           | 763            | 732          |
| 66854        | Trim35      | 79         | 186          | 37            | 286         | 107         | 249           | 60             | 285          |
| 66859        | Slc16a9     | 9          | 4            | 32            | 90          | 8           | 5             | 35             | 191          |
| 66861        | Dnajc10     | 139        | 284          | 28            | 3239        | 117         | 235           | 27             | 3300         |
| 66863        | Lztr1       | 74         | 1156         | 587           | 1824        | 64          | 852           | 475            | 1704         |
| 66865        | Pmpca       | 151        | 183          | 406           | 4368        | 148         | 158           | 408            | 4457         |
| 66866        | Nhlrc2      | 99         | 286          | 386           | 676         | 109         | 298           | 354            | 606          |
| 66867        | Hmg20a      | 96         | 811          | 460           | 2856        | 68          | 487           | 378            | 1677         |
| 66871        | Cpne8       | 4          | 3            | 24            | 30          | 5           | 11            | 22             | 38           |
| 66873        | 200009o22r  | 6          | 9            | 22            | 25          | 7           | 9             | 19             | 22           |
| 66874        | 200014j11r  | 198        | 75           | 353           | 2606        | 181         | 42            | 298            | 2788         |
| 66877        | Crnk1       | 69         | 248          | 54            | 453         | 76          | 253           | 60             | 361          |
| 66878        | Riok3       | 132        | 645          | 1586          | 3366        | 134         | 567           | 1409           | 3106         |
| 66881        | Pcyox1      | 21         | 9            | 154           | 639         | 28          | 33            | 295            | 1118         |
| 66882        | Bzw1        | 478        | 855          | 1470          | 2829        | 446         | 707           | 1273           | 2128         |
| 66884        | Appbp2      | 240        | 1795         | 929           | 3393        | 233         | 1902          | 1064           | 2409         |
| 66885        | Acadsb      | 11         | 25           | 277           | 399         | 9           | 15            | 210            | 266          |
| 66889        | Rnf128      | 5          | 3            | 38            | 33          | 5           | 3             | 37             | 51           |
| 66890        | Lman2       | 87         | 79           | 208           | 1372        | 108         | 95            | 273            | 1523         |
| 66895        | 300014i06r  | 8          | 4            | 25            | 389         | 198         | 2212          | 255            | 24958        |
| 66899        | Fip111      | 157        | 668          | 135           | 3081        | 148         | 682           | 114            | 3495         |
| 66901        | Proz        | 11         | 21           | 24            | 167         | 9           | 20            | 29             | 139          |
| 66902        | Mtap        | 41         | 172          | 246           | 10010       | 31          | 84            | 167            | 6429         |
| 66904        | Pccb        | 47         | 55           | 111           | 1064        | 36          | 40            | 83             | 950          |
| 66905        | M6prbp1     | 61         | 990          | 143           | 740         | 55          | 1069          | 104            | 726          |
| 66912        | Bzw2        | 161        | 855          | 1895          | 10878       | 48          | 194           | 490            | 4336         |
| 66914        | Vps28       | 283        | 8005         | 5895          | 13204       | 251         | 6989          | 4770           | 11483        |
| 66916        | Ndufb7      | 110        | 3532         | 116           | 5827        | 130         | 5019          | 119            | 7378         |
| 66917        | Chordc1     | 97         | 790          | 1816          | 20661       | 60          | 541           | 1486           | 16057        |
| 66922        | Rras2       | 233        | 967          | 470           | 6796        | 244         | 1235          | 566            | 6458         |
| 66925        | Sdhd        | 78         | 711          | 292           | 1641        | 88          | 901           | 355            | 1739         |
| 66929        | Asf1b       | 44         | 184          | 62            | 1191        | 54          | 269           | 71             | 1307         |
| 66930        | Fank1       | 7          | 14           | 23            | 22          | 7           | 8             | 18             | 30           |
| 66932        | Rexo1       | 115        | 107          | 244           | 345         | 112         | 70            | 252            | 460          |
| 66935        | 700023b02r  | 48         | 80           | 215           | 2355        | 52          | 51            | 177            | 1812         |
| 66940        | Scotin      | 524        | 75450        | 10251         | 23989       | 480         | 80410         | 7860           | 19461        |
| 66942        | Ddx18       | 205        | 313          | 1089          | 1161        | 216         | 322           | 1040           | 890          |
| 66945        | Sdha        | 362        | 451          | 36            | 14775       | 375         | 397           | 35             | 12063        |
| 66948        | Acad8       | 46         | 44           | 46            | 1260        | 20          | 18            | 37             | 371          |
| 66949        | Trim59      | 64         | 216          | 222           | 548         | 81          | 283           | 346            | 579          |
| 66953        | Cdca7       | 42         | 141          | 359           | 465         | 61          | 280           | 697            | 976          |
| 66957        | Serpinb11   | 4          | 5            | 22            | 28          | 4           | 4             | 22             | 32           |
| 66960        | 310047o13r  | 126        | 357          | 86            | 3156        | 67          | 160           | 47             | 2434         |
| 66966        | Trit1       | 36         | 130          | 33            | 439         | 43          | 227           | 29             | 589          |

| NCBI Gene ID | Gene Symbol | Affy. CD4+ | Agilent CD4+ | Illumina CD4+ | Nimbl. CD4+ | Affy. CD19+ | Agilent CD19+ | Illumina CD19+ | Nimbl. CD19+ |
|--------------|-------------|------------|--------------|---------------|-------------|-------------|---------------|----------------|--------------|
| 66968        | 310076l09r  | 14         | 17           | 27            | 20          | 12          | 13            | 25             | 26           |
| 66970        | Ssbp2       | 187        | 356          | 630           | 8676        | 37          | 78            | 139            | 1983         |
| 66971        | Cdk5rap1    | 65         | 125          | 305           | 830         | 45          | 85            | 205            | 806          |
| 66973        | Mrps18b     | 140        | 39           | 187           | 3930        | 136         | 49            | 187            | 4891         |
| 66975        | 110002o22r  | 52         | 47           | 242           | 2679        | 47          | 49            | 251            | 2939         |
| 66976        | 410002f23r  | 75         | 317          | 1247          | 479         | 69          | 262           | 1196           | 415          |
| 66978        | Luc7l       | 157        | 554          | 536           | 4154        | 130         | 520           | 432            | 3260         |
| 66979        | Pole4       | 139        | 1191         | 398           | 5726        | 125         | 1123          | 388            | 4548         |
| 66980        | Zdhhc6      | 66         | 341          | 22            | 3073        | 71          | 433           | 26             | 2986         |
| 66988        | Lap3        | 33         | 323          | 32            | 900         | 29          | 419           | 26             | 1079         |
| 66993        | Smarcd3     | 9          | 4            | 28            | 34          | 8           | 5             | 29             | 36           |
| 66996        | Ceacam11    | 5          | 2            | 23            | 51          | 5           | 3             | 25             | 51           |
| 66997        | Psmc12      | 102        | 1448         | 190           | 6864        | 104         | 1445          | 166            | 6151         |
| 66998        | Psmc5       | 67         | 433          | 75            | 1204        | 68          | 431           | 67             | 988          |
| 67003        | Uqcrc2      | 323        | 2465         | 2376          | 4296        | 333         | 2273          | 2124           | 3825         |
| 67010        | Rbm7        | 72         | 442          | 18            | 2351        | 71          | 444           | 21             | 2117         |
| 67014        | Mina        | 153        | 1105         | 372           | 7924        | 140         | 948           | 303            | 7259         |
| 67019        | Actr6       | 36         | 646          | 57            | 1838        | 20          | 298           | 37             | 1038         |
| 67025        | Rpl11       | 1278       | 68577        | 14300         | 43044       | 1180        | 69359         | 13853          | 41808        |
| 67026        | Thap4       | 20         | 203          | 193           | 158         | 22          | 271           | 201            | 207          |
| 67027        | Mkxn2       | 72         | 158          | 400           | 5997        | 62          | 145           | 388            | 5338         |
| 67030        | Fancl       | 31         | 174          | 221           | 1510        | 34          | 210           | 262            | 1525         |
| 67031        | Upf3a       | 52         | 2442         | 319           | 12999       | 50          | 2116          | 268            | 12055        |
| 67035        | Dnajb4      | 75         | 192          | 82            | 649         | 76          | 165           | 74             | 615          |
| 67036        | Mrpl45      | 31         | 565          | 22            | 571         | 43          | 1007          | 24             | 750          |
| 67037        | Pmf1        | 21         | 166          | 93            | 327         | 30          | 564           | 316            | 795          |
| 67038        | 010109i03r  | 6          | 7            | 26            | 90          | 9           | 36            | 43             | 265          |
| 67041        | Oxct1       | 100        | 3139         | 611           | 5292        | 53          | 1513          | 265            | 2789         |
| 67042        | Rabl4       | 30         | 1021         | 288           | 66          | 33          | 1875          | 431            | 88           |
| 67043        | Syap1       | 28         | 537          | 105           | 1460        | 30          | 597           | 102            | 1293         |
| 67045        | Riok2       | 69         | 476          | 23            | 159         | 71          | 553           | 20             | 108          |
| 67046        | Tbc1d7      | 5          | 16           | 149           | 178         | 6           | 25            | 227            | 236          |
| 67048        | 510030h06r  | 30         | 108          | 105           | 2302        | 39          | 86            | 186            | 2665         |
| 67049        | Pus3        | 74         | 152          | 827           | 4125        | 78          | 137           | 797            | 3494         |
| 67050        | 510020o08r  | 12         | 113          | 233           | 3790        | 12          | 97            | 240            | 4855         |
| 67053        | Rpp14       | 43         | 203          | 408           | 1926        | 46          | 201           | 402            | 2652         |
| 67054        | Paics       | 185        | 879          | 406           | 8633        | 196         | 973           | 406            | 7208         |
| 67057        | Yaf2        | 47         | 495          | 86            | 1783        | 39          | 397           | 66             | 1651         |
| 67067        | 10100o12r   | 102        | 1739         | 659           | 8241        | 94          | 2227          | 698            | 11538        |
| 67071        | Rps6ka6     | 4          | 2            | 21            | 17          | 4           | 3             | 21             | 16           |
| 67073        | Pi4k2b      | 10         | 7            | 64            | 413         | 14          | 23            | 102            | 711          |
| 67075        | 510529c04r  | 93         | 45           | 27            | 478         | 94          | 46            | 24             | 379          |
| 67084        | Ceacam14    | 4          | 3            | 17            | 20          | 4           | 3             | 18             | 23           |
| 67089        | Psmc6       | 136        | 1842         | 38            | 608         | 144         | 1231          | 39             | 601          |
| 67092        | Gatm        | 5          | 2            | 24            | 18          | 6           | 3             | 24             | 24           |
| 67097        | Rps10       | 1440       | 16350        | 18168         | 23751       | 1185        | 12787         | 14770          | 25296        |
| 67101        | 310039h08r  | 38         | 449          | 761           | 240         | 34          | 483           | 739            | 476          |
| 67103        | Ltb4dh      | 6          | 12           | 63            | 75          | 6           | 43            | 49             | 212          |
| 67111        | Asahl       | 25         | 88           | 23            | 92          | 84          | 462           | 25             | 207          |
| 67112        | Fgf22       | 23         | 6            | 37            | 135         | 24          | 6             | 41             | 133          |
| 67115        | Rpl14       | 99         | 413          | 86            | 30449       | 90          | 335           | 64             | 30526        |

| NCBI Gene ID | Gene Symbol | Affy. CD4+ | Agilent CD4+ | Illumina CD4+ | Nimbl. CD4+ | Affy. CD19+ | Agilent CD19+ | Illumina CD19+ | Nimbl. CD19+ |
|--------------|-------------|------------|--------------|---------------|-------------|-------------|---------------|----------------|--------------|
| 67116        | Cuedc2      | 25         | 538          | 263           | 6845        | 54          | 1762          | 606            | 12837        |
| 67118        | Bfar        | 60         | 718          | 693           | 5910        | 61          | 502           | 598            | 4669         |
| 67120        | Ttc14       | 84         | 90           | 268           | 2634        | 91          | 90            | 279            | 2127         |
| 67121        | Mastl       | 5          | 17           | 28            | 18          | 5           | 16            | 29             | 22           |
| 67122        | Nrarp       | 9          | 8            | 65            | 121         | 8           | 5             | 62             | 139          |
| 67123        | Ubap1       | 181        | 30           | 171           | 3727        | 221         | 27            | 205            | 3816         |
| 67126        | Atp5e       | 168        | 9541         | 217           | 9158        | 165         | 10499         | 220            | 11316        |
| 67128        | Ube2g1      | 69         | 460          | 533           | 1358        | 66          | 360           | 462            | 1156         |
| 67130        | Ndufa6      | 87         | 1085         | 655           | 7716        | 84          | 1059          | 586            | 8539         |
| 67131        | Acbd4       | 13         | 706          | 172           | 450         | 15          | 1117          | 211            | 628          |
| 67133        | Gp2         | 5          | 3            | 22            | 23          | 4           | 4             | 27             | 22           |
| 67134        | Nol5a       | 257        | 2397         | 300           | 4991        | 257         | 2931          | 280            | 3927         |
| 67136        | Kbtbd4      | 45         | 160          | 39            | 635         | 52          | 176           | 39             | 621          |
| 67141        | Fbxo5       | 28         | 148          | 22            | 9236        | 44          | 147           | 21             | 8727         |
| 67145        | Tomm34      | 221        | 654          | 337           | 1946        | 234         | 718           | 301            | 1501         |
| 67150        | Rnf141      | 47         | 186          | 52            | 306         | 81          | 230           | 65             | 494          |
| 67151        | Psmc9       | 38         | 91           | 58            | 589         | 37          | 100           | 67             | 537          |
| 67155        | Smarca2     | 196        | 520          | 60            | 4853        | 125         | 275           | 44             | 2987         |
| 67160        | Eef1g       | 26         | 19027        | 12675         | 14411       | 25          | 17887         | 12190          | 12223        |
| 67169        | Nradd       | 31         | 52           | 35            | 105         | 20          | 41            | 26             | 43           |
| 67181        | Dullard     | 154        | 1528         | 466           | 36          | 167         | 1693          | 456            | 35           |
| 67186        | Rplp2       | 27         | 128011       | 7173          | 13476       | 20          | 116123        | 5924           | 13022        |
| 67187        | Zmynd19     | 43         | 43           | 26            | 1972        | 38          | 37            | 26             | 1719         |
| 67198        | 810022102r  | 13         | 18           | 31            | 121         | 12          | 3             | 35             | 31           |
| 67199        | Pfdn1       | 54         | 113          | 39            | 1418        | 51          | 92            | 40             | 1227         |
| 67203        | Nde1        | 71         | 243          | 852           | 2501        | 74          | 277           | 1173           | 2453         |
| 67204        | Eif2s2      | 45         | 1839         | 251           | 6803        | 44          | 1398          | 276            | 6240         |
| 67207        | Lsm1        | 46         | 740          | 539           | 1970        | 43          | 827           | 505            | 2084         |
| 67212        | Mrpl55      | 58         | 965          | 263           | 911         | 63          | 1126          | 292            | 1129         |
| 67226        | Tmem19      | 38         | 315          | 302           | 607         | 36          | 236           | 264            | 677          |
| 67236        | 310452k22r  | 33         | 143          | 205           | 545         | 35          | 113           | 209            | 817          |
| 67238        | 810453i06r  | 116        | 394          | 142           | 916         | 111         | 528           | 140            | 1200         |
| 67239        | Bxdc1       | 50         | 717          | 550           | 3315        | 48          | 734           | 593            | 2651         |
| 67242        | Gemin6      | 16         | 34           | 93            | 143         | 19          | 44            | 92             | 120          |
| 67245        | Peli1       | 1078       | 5115         | 1505          | 16341       | 331         | 1062          | 424            | 6837         |
| 67248        | Rpl39       | 1345       | 28745        | 12791         | 27226       | 1146        | 24466         | 12811          | 25161        |
| 67252        | Cap2        | 10         | 4            | 24            | 146         | 7           | 3             | 26             | 48           |
| 67255        | Zfp422      | 43         | 407          | 27            | 3032        | 44          | 395           | 27             | 2600         |
| 67260        | Lass4       | 88         | 844          | 45            | 3917        | 147         | 1301          | 63             | 5985         |
| 67264        | Ndufb8      | 60         | 1711         | 1444          | 2472        | 56          | 2533          | 1860           | 3501         |
| 67268        | 300073g15r  | 244        | 47           | 188           | 25610       | 195         | 49            | 128            | 20668        |
| 67269        | Agtbbp1     | 67         | 170          | 54            | 1022        | 87          | 195           | 53             | 846          |
| 67270        | 310ertd322r | 15         | 805          | 504           | 16433       | 14          | 866           | 505            | 15747        |
| 67273        | Ndufa10     | 224        | 261          | 1572          | 2139        | 200         | 167           | 1076           | 1435         |
| 67281        | Rpl37       | 1291       | 11920        | 18238         | 43145       | 1246        | 13334         | 17991          | 47016        |
| 67283        | Slc25a19    | 37         | 1196         | 594           | 335         | 78          | 3806          | 1312           | 590          |
| 67285        | Sdccag10    | 47         | 65           | 23            | 967         | 57          | 100           | 22             | 1043         |
| 67286        | Rab15       | 18         | 4            | 32            | 89          | 48          | 68            | 107            | 675          |
| 67287        | Parp6       | 112        | 456          | 443           | 953         | 106         | 335           | 361            | 596          |
| 67290        | l10040n11r  | 48         | 108          | 393           | 1002        | 45          | 117           | 346            | 947          |
| 67292        | Pigc        | 16         | 585          | 26            | 2486        | 14          | 524           | 26             | 1934         |

| NCBI Gene ID | Gene Symbol | Affy. CD4+ | Agilent CD4+ | Illumina CD4+ | Nimbl. CD4+ | Affy. CD19+ | Agilent CD19+ | Illumina CD19+ | Nimbl. CD19+ |
|--------------|-------------|------------|--------------|---------------|-------------|-------------|---------------|----------------|--------------|
| 67295        | Rab3c       | 5          | 2            | 29            | 48          | 5           | 3             | 26             | 48           |
| 67296        | Socs4       | 56         | 129          | 114           | 892         | 60          | 105           | 121            | 924          |
| 67298        | Gprasp1     | 40         | 1251         | 969           | 558         | 33          | 641           | 555            | 176          |
| 67299        | Dock7       | 6          | 20           | 23            | 32          | 6           | 20            | 21             | 41           |
| 67300        | Cltc        | 324        | 263          | 88            | 804         | 596         | 338           | 186            | 1045         |
| 67305        | Gpx7        | 7          | 3            | 28            | 108         | 7           | 9             | 34             | 224          |
| 67306        | l10050n22r  | 5          | 6            | 29            | 34          | 6           | 11            | 46             | 80           |
| 67307        | 110049j23r  | 18         | 7            | 55            | 124         | 15          | 3             | 42             | 65           |
| 67308        | Mrpl46      | 55         | 222          | 748           | 6619        | 54          | 242           | 781            | 6975         |
| 67315        | Ceacam12    | 5          | 2            | 18            | 99          | 4           | 3             | 17             | 115          |
| 67320        | lqcf4       | 5          | 5            | 24            | 96          | 4           | 6             | 25             | 58           |
| 67328        | Lyzl1       | 4          | 3            | 25            | 32          | 4           | 3             | 28             | 27           |
| 67331        | Atp8b3      | 6          | 8            | 31            | 86          | 7           | 5             | 33             | 93           |
| 67332        | Snrpd3      | 346        | 2648         | 1223          | 20190       | 232         | 1395          | 629            | 15585        |
| 67333        | Stk35       | 59         | 89           | 24            | 155         | 75          | 144           | 25             | 114          |
| 67334        | 700054o13r  | 6          | 6            | 22            | 65          | 6           | 54            | 25             | 60           |
| 67337        | Cstf1       | 57         | 1087         | 535           | 363         | 81          | 1256          | 545            | 293          |
| 67350        | 700084e18r  | 37         | 61           | 67            | 78          | 30          | 73            | 65             | 93           |
| 67356        | Tmco5       | 4          | 9            | 39            | 26          | 4           | 12            | 37             | 31           |
| 67365        | Hdhd1a      | 4          | 6            | 49            | 16          | 5           | 3             | 43             | 15           |
| 67366        | 310008k16r  | 4          | 2            | 29            | 25          | 4           | 3             | 26             | 30           |
| 67367        | 110007m14i  | 172        | 951          | 87            | 11814       | 144         | 559           | 60             | 7775         |
| 67369        | Qpct1       | 30         | 70           | 21            | 209         | 26          | 66            | 19             | 93           |
| 67373        | 210010c04r  | 6          | 26           | 21            | 87          | 6           | 23            | 24             | 53           |
| 67374        | Jam2        | 10         | 3            | 37            | 163         | 10          | 3             | 42             | 117          |
| 67375        | Qprt        | 76         | 400          | 226           | 1428        | 17          | 34            | 31             | 715          |
| 67378        | Bbs2        | 24         | 22           | 89            | 64          | 34          | 27            | 111            | 78           |
| 67379        | Dedd2       | 68         | 1811         | 1107          | 548         | 58          | 1304          | 764            | 386          |
| 67382        | Brd3        | 68         | 389          | 1207          | 2035        | 80          | 384           | 1252           | 2314         |
| 67383        | 410127l17r  | 40         | 91           | 30            | 314         | 43          | 157           | 25             | 276          |
| 67384        | Bag4        | 53         | 68           | 240           | 417         | 53          | 67            | 218            | 417          |
| 67387        | Unc50       | 46         | 1056         | 24            | 4844        | 53          | 1103          | 24             | 4386         |
| 67388        | 110008f13r  | 222        | 3376         | 1808          | 7099        | 182         | 2982          | 1500           | 4707         |
| 67391        | Fundc2      | 25         | 5            | 37            | 6270        | 24          | 7             | 44             | 6273         |
| 67393        | Cxxc5       | 28         | 23           | 27            | 137         | 135         | 658           | 24             | 2317         |
| 67395        | 930403l05r  | 10         | 3            | 17            | 21          | 11          | 3             | 25             | 25           |
| 67397        | Erp29       | 31         | 4928         | 1741          | 2794        | 76          | 15033         | 4327           | 6399         |
| 67398        | Srpr        | 258        | 219          | 575           | 986         | 269         | 208           | 569            | 880          |
| 67399        | Pdlim7      | 17         | 51           | 163           | 85          | 39          | 351           | 772            | 218          |
| 67402        | Txndc8      | 5          | 6            | 25            | 31          | 5           | 4             | 27             | 26           |
| 67405        | Nts         | 4          | 5            | 23            | 15          | 4           | 7             | 27             | 15           |
| 67412        | 330407j23r  | 5          | 5            | 25            | 28          | 4           | 7             | 26             | 22           |
| 67414        | Mfn1        | 57         | 193          | 393           | 667         | 55          | 227           | 379            | 489          |
| 67416        | Armcx2      | 27         | 305          | 608           | 2694        | 26          | 253           | 522            | 2354         |
| 67418        | Ppil4       | 100        | 1136         | 28            | 5396        | 94          | 1009          | 33             | 4560         |
| 67419        | 332451o06r  | 5          | 17           | 24            | 41          | 5           | 12            | 27             | 48           |
| 67422        | Dhdds       | 82         | 166          | 74            | 2448        | 83          | 166           | 75             | 2736         |
| 67425        | Eps8l1      | 30         | 62           | 48            | 631         | 33          | 79            | 45             | 1303         |
| 67426        | Cabc1       | 38         | 78           | 38            | 447         | 86          | 376           | 104            | 1921         |
| 67427        | Rps20       | 1786       | 126838       | 19580         | 39267       | 1558        | 153807        | 19943          | 38388        |
| 67430        | 321536k21r  | 5          | 4            | 20            | 18          | 5           | 4             | 22             | 18           |



| NCBI Gene ID | Gene Symbol | Affy. CD4+ | Agilent CD4+ | Illumina CD4+ | Nimbl. CD4+ | Affy. CD19+ | Agilent CD19+ | Illumina CD19+ | Nimbl. CD19+ |
|--------------|-------------|------------|--------------|---------------|-------------|-------------|---------------|----------------|--------------|
| 67437        | Ssr3        | 143        | 820          | 140           | 6183        | 142         | 702           | 123            | 4286         |
| 67439        | Xab2        | 97         | 871          | 172           | 597         | 125         | 940           | 163            | 564          |
| 67440        | Papd1       | 89         | 490          | 466           | 1442        | 91          | 532           | 466            | 1374         |
| 67443        | Map1lc3b    | 126        | 1352         | 872           | 3681        | 122         | 1175          | 788            | 3385         |
| 67445        | C1qtnf4     | 11         | 123          | 39            | 85          | 9           | 137           | 30             | 107          |
| 67448        | Plxdc2      | 6          | 5            | 30            | 21          | 5           | 3             | 31             | 28           |
| 67451        | Pkp2        | 7          | 2            | 25            | 14          | 8           | 3             | 27             | 19           |
| 67454        | 200009f10r  | 6          | 3            | 32            | 175         | 6           | 40            | 41             | 511          |
| 67455        | Klhl13      | 5          | 22           | 23            | 14          | 5           | 25            | 23             | 19           |
| 67457        | 200004m23i  | 213        | 6606         | 125           | 2367        | 52          | 1253          | 47             | 565          |
| 67459        | Nvl         | 114        | 38           | 155           | 198         | 109         | 22            | 179            | 140          |
| 67460        | Decr1       | 24         | 5            | 42            | 75          | 32          | 12            | 57             | 130          |
| 67464        | Entpd4      | 143        | 126          | 1259          | 2494        | 117         | 81            | 910            | 2617         |
| 67465        | Sf3a1       | 84         | 560          | 670           | 296         | 75          | 518           | 629            | 451          |
| 67466        | Pdcl        | 87         | 181          | 32            | 889         | 96          | 231           | 22             | 822          |
| 67467        | 200011i18r  | 89         | 18           | 39            | 1613        | 90          | 20            | 37             | 1543         |
| 67468        | Mmd         | 48         | 73           | 317           | 2754        | 43          | 60            | 244            | 1948         |
| 67469        | Abhd5       | 38         | 11           | 69            | 374         | 23          | 3             | 44             | 90           |
| 67470        | Abcg8       | 8          | 9            | 31            | 27          | 7           | 8             | 27             | 23           |
| 67474        | Snap29      | 51         | 257          | 596           | 3029        | 137         | 744           | 1529           | 9382         |
| 67484        | 200005p05r  | 7          | 6            | 32            | 143         | 6           | 6             | 32             | 214          |
| 67486        | Polr3g      | 28         | 85           | 55            | 315         | 21          | 80            | 65             | 339          |
| 67487        | Dhx40       | 115        | 582          | 57            | 1583        | 118         | 580           | 56             | 2017         |
| 67489        | Ap4b1       | 50         | 642          | 29            | 1255        | 62          | 908           | 27             | 1474         |
| 67492        | Anubl1      | 5          | 2            | 25            | 24          | 5           | 5             | 22             | 42           |
| 67500        | Ccar1       | 110        | 601          | 1164          | 4571        | 123         | 487           | 1220           | 5878         |
| 67504        | Rnf151      | 13         | 30           | 21            | 23          | 11          | 31            | 21             | 19           |
| 67512        | Agpat2      | 36         | 27           | 49            | 83          | 56          | 49            | 59             | 83           |
| 67516        | Kctd4       | 5          | 36           | 28            | 592         | 6           | 34            | 25             | 457          |
| 67528        | Nudt7       | 23         | 218          | 71            | 857         | 27          | 282           | 99             | 1130         |
| 67529        | Fgfr1op2    | 136        | 213          | 1517          | 2137        | 165         | 134           | 1619           | 1801         |
| 67530        | Uqcrb       | 112        | 1135         | 545           | 18744       | 210         | 1118          | 587            | 21509        |
| 67533        | Ppfibp1     | 12         | 37           | 45            | 72          | 13          | 51            | 56             | 96           |
| 67534        | Ttll4       | 146        | 41           | 57            | 134         | 112         | 24            | 51             | 75           |
| 67538        | Zswim3      | 14         | 79           | 82            | 112         | 14          | 78            | 76             | 62           |
| 67542        | Cog6        | 51         | 248          | 216           | 1345        | 50          | 218           | 205            | 1044         |
| 67544        | 2002442k08r | 82         | 379          | 114           | 304         | 78          | 393           | 111            | 352          |
| 67547        | Slc39a8     | 16         | 16           | 24            | 109         | 11          | 3             | 24             | 36           |
| 67549        | Gpr89       | 37         | 10           | 110           | 918         | 35          | 4             | 104            | 563          |
| 67552        | H2afy3      | 20         | 51           | 29            | 147         | 16          | 33            | 25             | 184          |
| 67554        | Slc25a30    | 85         | 167          | 161           | 82          | 52          | 103           | 127            | 65           |
| 67555        | 933434i20r  | 5          | 2            | 31            | 25          | 5           | 3             | 31             | 21           |
| 67556        | Pigm        | 118        | 26           | 51            | 1192        | 96          | 22            | 78             | 1047         |
| 67563        | Narfl       | 16         | 713          | 45            | 791         | 18          | 1080          | 42             | 1074         |
| 67564        | Tmem35      | 8          | 28           | 29            | 108         | 7           | 7             | 20             | 115          |
| 67573        | Loxl4       | 10         | 6            | 29            | 48          | 11          | 6             | 28             | 35           |
| 67578        | 200424g05r  | 9          | 17           | 35            | 26          | 8           | 4             | 34             | 15           |
| 67579        | Cpeb4       | 125        | 125          | 200           | 731         | 110         | 57            | 174            | 645          |
| 67582        | Slc25a26    | 40         | 56           | 82            | 1503        | 40          | 84            | 78             | 2033         |
| 67588        | Rnf41       | 63         | 81           | 36            | 1068        | 118         | 113           | 44             | 1959         |
| 67590        | 200521e07r  | 22         | 39           | 143           | 31          | 26          | 43            | 145            | 30           |

| NCBI Gene ID | Gene Symbol | Affy. CD4+ | Agilent CD4+ | Illumina CD4+ | Nimbl. CD4+ | Affy. CD19+ | Agilent CD19+ | Illumina CD19+ | Nimbl. CD19+ |
|--------------|-------------|------------|--------------|---------------|-------------|-------------|---------------|----------------|--------------|
| 67593        | 30519g04r   | 7          | 7            | 36            | 52          | 7           | 5             | 37             | 46           |
| 67603        | Dusp6       | 81         | 1421         | 366           | 1776        | 199         | 5111          | 990            | 2786         |
| 67605        | Akt1s1      | 48         | 60           | 166           | 425         | 54          | 123           | 159            | 590          |
| 67615        | Ube2r2      | 194        | 1420         | 25            | 4700        | 164         | 797           | 25             | 3765         |
| 67618        | Aasdhppt    | 79         | 316          | 41            | 1769        | 66          | 262           | 49             | 2479         |
| 67623        | Tm7sf3      | 28         | 130          | 74            | 467         | 27          | 135           | 82             | 529          |
| 67628        | Anp32b      | 183        | 5588         | 60            | 30272       | 187         | 6421          | 48             | 26929        |
| 67630        | Samd8       | 75         | 101          | 33            | 369         | 69          | 79            | 29             | 247          |
| 67634        | Ftmt        | 6          | 63           | 24            | 38          | 7           | 68            | 23             | 29           |
| 67637        | 30470p17r   | 7          | 11           | 20            | 43          | 6           | 9             | 22             | 38           |
| 67638        | 930483j18r  | 6          | 13           | 23            | 29          | 6           | 14            | 22             | 37           |
| 67655        | Ctdp1       | 67         | 225          | 59            | 68          | 60          | 154           | 49             | 48           |
| 67657        | Rabl3       | 32         | 50           | 290           | 1337        | 39          | 66            | 351            | 1585         |
| 67661        | Ift172      | 16         | 258          | 174           | 167         | 32          | 908           | 507            | 338          |
| 67664        | Rnf125      | 83         | 218          | 78            | 1870        | 7           | 19            | 25             | 165          |
| 67665        | Dctn4       | 90         | 408          | 467           | 3486        | 102         | 438           | 534            | 4905         |
| 67666        | Hapln3      | 7          | 212          | 32            | 66          | 8           | 83            | 25             | 64           |
| 67671        | Rpl38       | 967        | 66203        | 17366         | 23866       | 873         | 59312         | 17774          | 24163        |
| 67673        | Tceb2       | 220        | 4010         | 3281          | 1449        | 212         | 4250          | 2820           | 2669         |
| 67676        | Rpp21       | 45         | 4003         | 1680          | 3177        | 44          | 3655          | 1297           | 3585         |
| 67678        | Lsm3        | 77         | 725          | 753           | 7536        | 87          | 927           | 803            | 8108         |
| 67680        | Sdhb        | 84         | 680          | 915           | 11776       | 76          | 694           | 820            | 11962        |
| 67681        | Mrpl18      | 181        | 922          | 218           | 13433       | 177         | 883           | 201            | 12139        |
| 67684        | 30001p08r   | 352        | 2795         | 1392          | 5379        | 397         | 4067          | 1714           | 4451         |
| 67685        | Dyx1c1      | 10         | 84           | 16            | 257         | 9           | 38            | 25             | 107          |
| 67686        | 700011j10r  | 21         | 162          | 62            | 1054        | 25          | 155           | 65             | 1302         |
| 67689        | Aldh3b1     | 10         | 29           | 20            | 40          | 24          | 1544          | 455            | 4456         |
| 67692        | 700020n01r  | 7          | 5            | 26            | 58          | 8           | 6             | 33             | 52           |
| 67693        | 310003f16r  | 85         | 2289         | 1746          | 7491        | 90          | 2628          | 1789           | 7598         |
| 67695        | 310016e02r  | 106        | 383          | 49            | 7480        | 108         | 397           | 55             | 8309         |
| 67702        | Rnf149      | 63         | 789          | 17            | 580         | 43          | 393           | 14             | 265          |
| 67703        | Kirrel3     | 9          | 4            | 24            | 24          | 8           | 4             | 27             | 35           |
| 67704        | 810037i17r  | 143        | 1140         | 1643          | 9984        | 149         | 1098          | 1546           | 8815         |
| 67706        | Taf6l       | 131        | 59           | 34            | 180         | 146         | 77            | 43             | 202          |
| 67707        | Mrpl24      | 168        | 1434         | 1875          | 11102       | 138         | 1058          | 1465           | 7993         |
| 67708        | 810048j11r  | 15         | 126          | 41            | 1520        | 13          | 121           | 47             | 1481         |
| 67709        | Reg4        | 6          | 2            | 26            | 18          | 7           | 3             | 21             | 18           |
| 67710        | Polr2g      | 146        | 3880         | 1355          | 11013       | 144         | 3854          | 1434           | 8885         |
| 67717        | Lipf        | 4          | 34           | 28            | 45          | 4           | 33            | 26             | 43           |
| 67724        | Pop1        | 15         | 385          | 120           | 443         | 19          | 499           | 115            | 461          |
| 67725        | Nudt13      | 47         | 314          | 62            | 910         | 48          | 329           | 56             | 1025         |
| 67727        | Stx17       | 59         | 103          | 61            | 575         | 73          | 109           | 77             | 653          |
| 67729        | Mansc1      | 7          | 59           | 20            | 941         | 7           | 6             | 16             | 30           |
| 67731        | Fbxo32      | 54         | 292          | 62            | 784         | 45          | 220           | 51             | 281          |
| 67738        | Ppid        | 118        | 1783         | 1400          | 6630        | 123         | 1631          | 1249           | 6932         |
| 67742        | Samsn1      | 43         | 266          | 474           | 4137        | 75          | 615           | 945            | 7137         |
| 67749        | 30583h14r   | 5          | 5            | 35            | 77          | 4           | 3             | 24             | 63           |
| 67750        | 930578i06r  | 6          | 3            | 29            | 29          | 7           | 3             | 29             | 30           |
| 67752        | 930579j09r  | 11         | 48           | 54            | 36          | 12          | 35            | 54             | 45           |
| 67753        | 30579c15r   | 5          | 4            | 20            | 139         | 5           | 3             | 26             | 232          |
| 67755        | Ddx47       | 182        | 242          | 2548          | 3099        | 182         | 234           | 2441           | 3280         |

| NCBI Gene ID | Gene Symbol | Affy. CD4+ | Agilent CD4+ | Illumina CD4+ | Nimbl. CD4+ | Affy. CD19+ | Agilent CD19+ | Illumina CD19+ | Nimbl. CD19+ |
|--------------|-------------|------------|--------------|---------------|-------------|-------------|---------------|----------------|--------------|
| 67758        | Aadac       | 5          | 6            | 24            | 28          | 5           | 5             | 22             | 30           |
| 67760        | Slc38a2     | 448        | 1478         | 2812          | 2124        | 420         | 1444          | 2362           | 1812         |
| 67771        | Arpc5       | 422        | 565          | 503           | 21415       | 506         | 756           | 515            | 18428        |
| 67772        | Chd8        | 260        | 1468         | 983           | 3321        | 273         | 1201          | 915            | 3628         |
| 67773        | Myst1       | 91         | 1525         | 643           | 2561        | 89          | 1710          | 622            | 2157         |
| 67774        | Loh12cr1    | 38         | 31           | 67            | 64          | 40          | 30            | 56             | 81           |
| 67778        | Zfp639      | 58         | 1094         | 1023          | 1204        | 62          | 926           | 1011           | 1020         |
| 67781        | Ilf2        | 76         | 192          | 801           | 1714        | 77          | 184           | 794            | 1378         |
| 67788        | 330577e15r  | 68         | 990          | 62            | 11999       | 75          | 1041          | 59             | 13524        |
| 67790        | Rab39b      | 6          | 2            | 37            | 23          | 6           | 2             | 38             | 27           |
| 67795        | 330404n21r  | 9          | 5            | 22            | 36          | 11          | 10            | 34             | 45           |
| 67797        | 330403a03r  | 38         | 370          | 31            | 2861        | 38          | 253           | 33             | 2303         |
| 67800        | Dgat2       | 9          | 49           | 35            | 54          | 8           | 38            | 33             | 47           |
| 67804        | Snx2        | 140        | 1069         | 1286          | 12091       | 724         | 7454          | 5383           | 27960        |
| 67808        | 200015a19r  | 303        | 1106         | 1825          | 7813        | 228         | 679           | 1275           | 5746         |
| 67811        | Poldip2     | 52         | 175          | 490           | 253         | 59          | 167           | 604            | 234          |
| 67812        | Ubx2        | 169        | 1628         | 34            | 11055       | 145         | 1250          | 32             | 7746         |
| 67815        | Sec14l2     | 7          | 16           | 38            | 48          | 8           | 19            | 36             | 58           |
| 67821        | Atp1b4      | 7          | 2            | 22            | 18          | 6           | 3             | 25             | 25           |
| 67834        | Idh3a       | 78         | 299          | 163           | 468         | 74          | 312           | 132            | 405          |
| 67836        | 300041n16r  | 42         | 99           | 383           | 2655        | 46          | 98            | 344            | 2747         |
| 67838        | Dnajb11     | 112        | 1532         | 775           | 7377        | 135         | 1854          | 880            | 7850         |
| 67839        | Gpsm1       | 35         | 478          | 255           | 87          | 37          | 736           | 313            | 96           |
| 67840        | Mrp63       | 31         | 2429         | 50            | 4884        | 33          | 2360          | 49             | 4803         |
| 67843        | Slc35a4     | 182        | 138          | 527           | 3734        | 187         | 110           | 460            | 3618         |
| 67844        | Rab32       | 9          | 48           | 115           | 712         | 7           | 22            | 76             | 421          |
| 67845        | Zfp364      | 143        | 492          | 66            | 5730        | 147         | 540           | 57             | 5057         |
| 67847        | Sncaip      | 5          | 13           | 21            | 43          | 5           | 24            | 24             | 38           |
| 67848        | Ddx55       | 44         | 223          | 816           | 1237        | 46          | 219           | 846            | 931          |
| 67849        | Cdca5       | 8          | 44           | 53            | 194         | 8           | 149           | 119            | 448          |
| 67854        | Slco6b1     | 4          | 2            | 17            | 27          | 4           | 3             | 20             | 16           |
| 67856        | Echdc3      | 10         | 6            | 26            | 45          | 10          | 63            | 44             | 231          |
| 67857        | Ppp6c       | 90         | 805          | 1032          | 6624        | 90          | 777           | 984            | 5526         |
| 67859        | 310002j15r  | 20         | 16           | 20            | 42          | 19          | 17            | 21             | 42           |
| 67860        | S100a16     | 10         | 3            | 26            | 86          | 8           | 3             | 28             | 51           |
| 67861        | 310005e10r  | 27         | 335          | 336           | 1344        | 33          | 393           | 495            | 1676         |
| 67862        | 310033p09r  | 31         | 835          | 302           | 1102        | 30          | 961           | 284            | 1012         |
| 67863        | Slc25a11    | 102        | 1471         | 414           | 5676        | 118         | 1905          | 500            | 6075         |
| 67865        | Rgs10       | 260        | 5026         | 2289          | 15411       | 51          | 590           | 338            | 4020         |
| 67866        | Wfdc1       | 9          | 27           | 24            | 22          | 9           | 36            | 21             | 43           |
| 67867        | Lrrc28      | 30         | 77           | 261           | 990         | 22          | 56            | 169            | 899          |
| 67869        | Paip2       | 153        | 3192         | 658           | 7581        | 198         | 3644          | 740            | 9463         |
| 67871        | Mrrf        | 45         | 571          | 90            | 3620        | 33          | 491           | 83             | 3417         |
| 67873        | 410018c20r  | 38         | 730          | 22            | 334         | 36          | 674           | 25             | 262          |
| 67877        | Nat5        | 83         | 704          | 26            | 3717        | 84          | 508           | 27             | 2901         |
| 67880        | Dcxr        | 34         | 83           | 33            | 130         | 43          | 94            | 75             | 1226         |
| 67881        | 310034k20r  | 84         | 441          | 1869          | 2638        | 79          | 377           | 1646           | 2446         |
| 67883        | Uxs1        | 62         | 21           | 19            | 540         | 50          | 14            | 19             | 523          |
| 67884        | 310043g02r  | 17         | 75           | 49            | 118         | 17          | 81            | 61             | 188          |
| 67889        | Rbm18       | 69         | 610          | 494           | 6068        | 71          | 455           | 377            | 4481         |
| 67891        | Rpl4        | 2672       | 1980         | 109           | 32829       | 2539        | 2107          | 90             | 38024        |

| NCBI Gene ID | Gene Symbol | Affy. CD4+ | Agilent CD4+ | Illumina CD4+ | Nimbl. CD4+ | Affy. CD19+ | Agilent CD19+ | Illumina CD19+ | Nimbl. CD19+ |
|--------------|-------------|------------|--------------|---------------|-------------|-------------|---------------|----------------|--------------|
| 67897        | Rnmt        | 62         | 271          | 83            | 3660        | 60          | 269           | 82             | 2918         |
| 67899        | 10110k16r   | 37         | 313          | 1289          | 5003        | 19          | 81            | 412            | 1717         |
| 67900        | 700020c11r  | 11         | 125          | 23            | 230         | 10          | 256           | 33             | 373          |
| 67902        | Sumf2       | 56         | 138          | 45            | 2043        | 44          | 83            | 40             | 1037         |
| 67912        | 500012h06r  | 26         | 159          | 360           | 921         | 35          | 144           | 388            | 745          |
| 67916        | Ppap2b      | 7          | 11           | 28            | 88          | 37          | 638           | 283            | 277          |
| 67917        | Zcchc3      | 8          | 7            | 34            | 53          | 11          | 21            | 53             | 72           |
| 67923        | Tceb1       | 131        | 206          | 254           | 6431        | 117         | 217           | 233            | 4909         |
| 67928        | Abca14      | 5          | 5            | 34            | 74          | 5           | 6             | 31             | 111          |
| 67931        | Serpini2    | 4          | 6            | 24            | 24          | 4           | 7             | 28             | 34           |
| 67938        | Mylc2b      | 1030       | 9910         | 7209          | 17007       | 842         | 8325          | 5921           | 14807        |
| 67941        | Rps27l      | 32         | 1578         | 1773          | 2100        | 44          | 1992          | 2226           | 2776         |
| 67942        | Atp5g2      | 319        | 4403         | 1106          | 12083       | 399         | 5566          | 1203           | 13903        |
| 67943        | Mesdc2      | 65         | 1034         | 28            | 112         | 57          | 867           | 33             | 116          |
| 67945        | Rpl41       | 834        | 56982        | 16780         | 42740       | 866         | 77552         | 17805          | 44012        |
| 67946        | Spata6      | 73         | 81           | 309           | 651         | 25          | 24            | 124            | 175          |
| 67948        | Fbxo28      | 83         | 182          | 441           | 701         | 47          | 107           | 260            | 384          |
| 67949        | Mki67ip     | 90         | 1032         | 545           | 3879        | 100         | 1106          | 555            | 3796         |
| 67952        | Tomm20      | 150        | 1923         | 29            | 5116        | 106         | 1468          | 30             | 4469         |
| 67955        | Sugt1       | 106        | 2859         | 110           | 8125        | 98          | 2440          | 87             | 7124         |
| 67958        | 510101n10r  | 128        | 217          | 1516          | 3878        | 141         | 140           | 1558           | 3661         |
| 67963        | Npc2        | 413        | 3728         | 1456          | 29857       | 113         | 786           | 373            | 16065        |
| 67967        | Pold3       | 56         | 247          | 350           | 440         | 97          | 527           | 564            | 704          |
| 67973        | Mphosph1C   | 66         | 308          | 20            | 1193        | 67          | 327           | 19             | 850          |
| 67978        | 132405b04r  | 11         | 2            | 28            | 54          | 12          | 3             | 31             | 48           |
| 67979        | Atad1       | 144        | 698          | 498           | 2806        | 143         | 618           | 417            | 2544         |
| 67980        | Gnpda2      | 25         | 41           | 419           | 1011        | 21          | 24            | 301            | 549          |
| 67985        | Ssxb1       | 5          | 3            | 18            | 71          | 5           | 3             | 24             | 34           |
| 67991        | Btbd14a     | 18         | 132          | 29            | 618         | 14          | 8             | 26             | 30           |
| 67993        | Nudt12      | 5          | 4            | 25            | 30          | 6           | 3             | 26             | 41           |
| 67994        | Mrps11      | 15         | 122          | 217           | 687         | 16          | 106           | 226            | 596          |
| 67996        | Sfrs6       | 379        | 1638         | 1304          | 7838        | 347         | 1378          | 1092           | 4955         |
| 68010        | Bambi       | 15         | 32           | 27            | 161         | 15          | 22            | 24             | 98           |
| 68011        | Snrpg       | 115        | 9792         | 5997          | 10091       | 126         | 9785          | 5595           | 10064        |
| 68015        | Trap1       | 136        | 150          | 1021          | 1123        | 131         | 154           | 1011           | 969          |
| 68018        | Col4a3bp    | 211        | 690          | 871           | 324         | 199         | 629           | 831            | 210          |
| 68020        | 310002n01r  | 53         | 219          | 385           | 2042        | 54          | 166           | 344            | 1687         |
| 68021        | Bphl        | 24         | 422          | 22            | 182         | 20          | 297           | 20             | 106          |
| 68024        | Hist1h2bc   | 13         | 87           | 276           | 1031        | 27          | 203           | 537            | 2757         |
| 68026        | 310417h13r  | 10         | 188          | 47            | 1858        | 15          | 351           | 120            | 3450         |
| 68031        | Rnf146      | 76         | 1104         | 26            | 2907        | 71          | 783           | 26             | 3130         |
| 68039        | Nmb         | 50         | 626          | 108           | 563         | 22          | 220           | 61             | 198          |
| 68041        | Mid1ip1     | 21         | 148          | 95            | 277         | 36          | 518           | 241            | 837          |
| 68045        | 700060e02r  | 124        | 878          | 3193          | 8439        | 131         | 886           | 3352           | 7732         |
| 68050        | 330407g11r  | 91         | 1019         | 858           | 3445        | 103         | 871           | 828            | 4115         |
| 68051        | Nutf2       | 29         | 942          | 701           | 4191        | 23          | 1035          | 612            | 3338         |
| 68052        | Rps13       | 798        | 53871        | 12059         | 30401       | 688         | 46409         | 10566          | 28047        |
| 68053        | l10003a22r  | 34         | 97           | 65            | 206         | 29          | 90            | 48             | 117          |
| 68054        | Serpina12   | 5          | 3            | 34            | 57          | 5           | 3             | 35             | 65           |
| 68055        | Atp5s       | 7          | 56           | 73            | 237         | 7           | 108           | 112            | 312          |
| 68058        | Chd1l       | 113        | 390          | 48            | 3680        | 107         | 316           | 46             | 2876         |

| NCBI Gene ID | Gene Symbol | Affy. CD4+ | Agilent CD4+ | Illumina CD4+ | Nimbl. CD4+ | Affy. CD19+ | Agilent CD19+ | Illumina CD19+ | Nimbl. CD19+ |
|--------------|-------------|------------|--------------|---------------|-------------|-------------|---------------|----------------|--------------|
| 68059        | Tm9sf2      | 219        | 1030         | 48            | 3735        | 219         | 901           | 43             | 2897         |
| 68077        | Gltscr2     | 609        | 747          | 801           | 5171        | 654         | 710           | 760            | 4747         |
| 68082        | Dusp19      | 14         | 50           | 265           | 1524        | 12          | 51            | 230            | 1264         |
| 68083        | Pak1ip1     | 67         | 2087         | 27            | 2461        | 65          | 2038          | 31             | 2314         |
| 68089        | Arpc4       | 177        | 1680         | 809           | 438         | 163         | 1947          | 684            | 262          |
| 68092        | Ncbp2       | 58         | 52           | 141           | 1915        | 52          | 67            | 140            | 1735         |
| 68098        | Rchy1       | 96         | 959          | 446           | 2152        | 109         | 983           | 466            | 1802         |
| 68099        | 720467c03r  | 8          | 80           | 141           | 572         | 7           | 46            | 96             | 351          |
| 68108        | 430008c03r  | 116        | 779          | 748           | 93          | 122         | 614           | 632            | 94           |
| 68114        | Mum1        | 68         | 2019         | 3768          | 1382        | 55          | 1188          | 2291           | 704          |
| 68115        | 430016h08r  | 15         | 216          | 262           | 2996        | 14          | 200           | 232            | 2632         |
| 68127        | 230217c12r  | 13         | 103          | 29            | 45          | 9           | 63            | 27             | 16           |
| 68134        | Upf3b       | 13         | 207          | 43            | 1450        | 22          | 365           | 52             | 1923         |
| 68137        | Kdelr1      | 115        | 113          | 26            | 1964        | 91          | 103           | 28             | 1632         |
| 68140        | Tigd2       | 119        | 384          | 581           | 4866        | 117         | 319           | 466            | 4618         |
| 68147        | Nola1       | 101        | 31           | 1324          | 5504        | 103         | 42            | 1324           | 5315         |
| 68149        | Otub2       | 16         | 20           | 29            | 309         | 18          | 24            | 102            | 291          |
| 68152        | 830415l20r  | 124        | 132          | 248           | 934         | 122         | 109           | 221            | 851          |
| 68153        | Gtf2e2      | 33         | 1096         | 199           | 3085        | 34          | 1150          | 215            | 3738         |
| 68162        | 330003a15r  | 8          | 2            | 23            | 16          | 8           | 3             | 25             | 13           |
| 68166        | Spire1      | 5          | 3            | 30            | 17          | 6           | 3             | 28             | 23           |
| 68171        | 730048i06r  | 4          | 2            | 20            | 15          | 4           | 3             | 24             | 18           |
| 68177        | Ebpl        | 50         | 22           | 218           | 2529        | 51          | 17            | 207            | 2677         |
| 68179        | 330408g06r  | 4          | 3            | 20            | 36          | 5           | 3             | 21             | 41           |
| 68183        | Bcas2       | 92         | 2261         | 628           | 3600        | 78          | 1957          | 480            | 2880         |
| 68184        | Denr        | 102        | 405          | 110           | 1821        | 103         | 506           | 122            | 1853         |
| 68192        | Leprotl1    | 476        | 1680         | 2768          | 17464       | 55          | 213           | 350            | 4239         |
| 68193        | Rpl24       | 1071       | 3887         | 16279         | 19348       | 915         | 2670          | 14867          | 22318        |
| 68194        | Ndufb4      | 47         | 1790         | 166           | 4287        | 50          | 1609          | 168            | 5132         |
| 68196        | Hsbp1       | 153        | 1098         | 472           | 7736        | 163         | 1120          | 476            | 7646         |
| 68197        | Ndufc2      | 169        | 1208         | 35            | 3871        | 176         | 1499          | 34             | 3418         |
| 68198        | Ndufb2      | 14         | 1124         | 69            | 4368        | 13          | 1490          | 71             | 4640         |
| 68202        | Ndufa5      | 44         | 1894         | 1105          | 3648        | 39          | 1605          | 932            | 3972         |
| 68215        | 510510h03r  | 61         | 105          | 31            | 1233        | 72          | 75            | 28             | 1018         |
| 68224        | 700067p10r  | 5          | 20           | 24            | 35          | 6           | 15            | 30             | 43           |
| 68229        | Ai846148    | 33         | 27           | 140           | 176         | 26          | 20            | 87             | 189          |
| 68231        | 700113o17r  | 15         | 34           | 38            | 17          | 15          | 33            | 40             | 18           |
| 68240        | Rpa3        | 11         | 283          | 324           | 1527        | 14          | 260           | 403            | 2031         |
| 68250        | 730536a07r  | 76         | 861          | 26            | 4390        | 84          | 989           | 32             | 3399         |
| 68255        | Tmem86b     | 74         | 9            | 64            | 118         | 55          | 6             | 58             | 179          |
| 68262        | Agpat4      | 14         | 122          | 45            | 103         | 19          | 555           | 73             | 226          |
| 68263        | Pdhb        | 74         | 887          | 242           | 7628        | 74          | 749           | 198            | 6710         |
| 68267        | Slc25a22    | 30         | 142          | 232           | 183         | 24          | 101           | 170            | 90           |
| 68268        | Zdhhc21     | 66         | 305          | 191           | 2318        | 69          | 374           | 198            | 2002         |
| 68271        | 330441o14r  | 6          | 7            | 34            | 21          | 6           | 5             | 29             | 19           |
| 68272        | Rbm28       | 96         | 2162         | 1751          | 2533        | 91          | 1626          | 1338           | 2297         |
| 68275        | Rpa1        | 156        | 993          | 3773          | 6225        | 111         | 610           | 2764           | 4007         |
| 68278        | Ddx39       | 67         | 1483         | 39            | 8471        | 77          | 1586          | 46             | 8638         |
| 68279        | Mcoln2      | 11         | 3            | 39            | 42          | 77          | 286           | 286            | 380          |
| 68283        | 530077c05r  | 8          | 3            | 33            | 22          | 7           | 10            | 37             | 31           |
| 68291        | Mto1        | 38         | 95           | 205           | 393         | 34          | 94            | 175            | 400          |

| NCBI Gene ID | Gene Symbol | Affy. CD4+ | Agilent CD4+ | Illumina CD4+ | Nimbl. CD4+ | Affy. CD19+ | Agilent CD19+ | Illumina CD19+ | Nimbl. CD19+ |
|--------------|-------------|------------|--------------|---------------|-------------|-------------|---------------|----------------|--------------|
| 68294        | 510009o03r  | 58         | 447          | 421           | 250         | 68          | 910           | 821            | 283          |
| 68310        | Zmym1       | 24         | 210          | 79            | 2936        | 20          | 174           | 77             | 2459         |
| 68314        | 510008f07r  | 11         | 16           | 27            | 40          | 12          | 5             | 26             | 33           |
| 68328        | Rab13       | 7          | 2            | 32            | 23          | 8           | 3             | 31             | 25           |
| 68332        | 510010e21r  | 99         | 611          | 729           | 4144        | 87          | 509           | 707            | 5185         |
| 68337        | Crip2       | 10         | 91           | 54            | 132         | 8           | 83            | 53             | 135          |
| 68342        | Ndufb10     | 42         | 5577         | 1177          | 2934        | 41          | 5869          | 1018           | 2804         |
| 68346        | Sirt5       | 25         | 140          | 163           | 719         | 21          | 65            | 95             | 434          |
| 68349        | Ndufs3      | 213        | 1378         | 1157          | 9562        | 217         | 1358          | 1094           | 8111         |
| 68350        | 510009k11r  | 65         | 112          | 298           | 274         | 75          | 148           | 293            | 382          |
| 68354        | 510009b14r  | 6          | 4            | 26            | 21          | 7           | 3             | 24             | 25           |
| 68355        | 510204k13r  | 6          | 144          | 78            | 40          | 8           | 164           | 120            | 70           |
| 68365        | Rab14       | 212        | 830          | 1620          | 14044       | 239         | 966           | 1513           | 13661        |
| 68375        | Ndufa8      | 121        | 849          | 511           | 15987       | 110         | 657           | 355            | 16117        |
| 68379        | Ciz1        | 119        | 1858         | 1258          | 2163        | 129         | 1886          | 1037           | 1795         |
| 68393        | Mogat1      | 5          | 29           | 27            | 129         | 5           | 32            | 22             | 119          |
| 68396        | Cml4        | 6          | 88           | 20            | 19          | 6           | 63            | 23             | 17           |
| 68401        | G6pc3       | 37         | 146          | 55            | 777         | 68          | 256           | 75             | 1392         |
| 68404        | Nrn1        | 5          | 47           | 77            | 61          | 5           | 11            | 34             | 34           |
| 68416        | Sycn        | 11         | 66           | 27            | 117         | 12          | 59            | 27             | 132          |
| 68427        | Slc39a13    | 42         | 130          | 79            | 190         | 51          | 204           | 107            | 345          |
| 68431        | Fbxl15      | 44         | 139          | 95            | 65          | 40          | 202           | 123            | 102          |
| 68440        | Dusp23      | 12         | 95           | 82            | 349         | 13          | 108           | 52             | 366          |
| 68441        | Rraga       | 120        | 418          | 39            | 3399        | 235         | 492           | 46             | 4491         |
| 68444        | Cyp2d13     | 5          | 2            | 21            | 21          | 5           | 3             | 19             | 23           |
| 68453        | Gpihbp1     | 10         | 123          | 29            | 40          | 10          | 107           | 32             | 33           |
| 68458        | Ppp1r14a    | 9          | 3            | 39            | 59          | 9           | 3             | 37             | 48           |
| 68463        | Mrpl14      | 30         | 1867         | 487           | 1234        | 40          | 1967          | 474            | 1454         |
| 68465        | Adipor2     | 167        | 3246         | 950           | 6931        | 113         | 2019          | 585            | 3311         |
| 68468        | Ly6g6c      | 12         | 53           | 32            | 13          | 14          | 43            | 32             | 14           |
| 68475        | Ssna1       | 64         | 721          | 558           | 3740        | 53          | 786           | 520            | 3708         |
| 68479        | Phf5a       | 103        | 918          | 2135          | 4406        | 109         | 1050          | 2304           | 5287         |
| 68481        | Mpzl1       | 8          | 17           | 21            | 49          | 9           | 19            | 24             | 57           |
| 68484        | Krtap16-8   | 5          | 3            | 22            | 13          | 5           | 4             | 23             | 13           |
| 68505        | l10014n23r  | 78         | 141          | 508           | 1501        | 65          | 115           | 461            | 1566         |
| 68512        | 110019j04r  | 43         | 733          | 1185          | 4094        | 47          | 723           | 1133           | 3916         |
| 68519        | Eml1        | 8          | 2            | 23            | 27          | 8           | 4             | 23             | 21           |
| 68520        | Zfyve21     | 32         | 45           | 114           | 1516        | 28          | 56            | 120            | 1482         |
| 68525        | Evc2        | 6          | 11           | 27            | 33          | 6           | 10            | 25             | 38           |
| 68533        | Mphosph6    | 28         | 341          | 190           | 1444        | 27          | 418           | 212            | 1449         |
| 68537        | Mrpl13      | 36         | 750          | 261           | 2210        | 33          | 743           | 247            | 1909         |
| 68549        | Sgol2       | 7          | 5            | 34            | 85          | 9           | 23            | 60             | 214          |
| 68550        | l10002n22r  | 9          | 17           | 144           | 577         | 9           | 19            | 145            | 657          |
| 68553        | l10001d15r  | 12         | 15           | 27            | 75          | 12          | 10            | 30             | 93           |
| 68556        | Uckl1       | 67         | 444          | 21            | 2858        | 71          | 448           | 18             | 2867         |
| 68558        | Ankra2      | 31         | 475          | 161           | 1142        | 29          | 490           | 176            | 940          |
| 68559        | Pdrg1       | 59         | 2289         | 801           | 10890       | 48          | 2421          | 665            | 10550        |
| 68563        | Dpm3        | 46         | 75           | 643           | 284         | 44          | 206           | 674            | 2153         |
| 68565        | Mrps18a     | 82         | 369          | 405           | 913         | 71          | 340           | 368            | 817          |
| 68566        | Drd1ip      | 20         | 73           | 35            | 132         | 19          | 67            | 34             | 208          |
| 68572        | Ict1        | 81         | 2953         | 283           | 546         | 46          | 1277          | 103            | 267          |

| NCBI<br>Gene ID | Gene<br>Symbol | Affy.<br>CD4+ | Agilent<br>CD4+ | Illumina<br>CD4+ | Nimbl.<br>CD4+ | Affy.<br>CD19+ | Agilent<br>CD19+ | Illumina<br>CD19+ | Nimbl.<br>CD19+ |
|-----------------|----------------|---------------|-----------------|------------------|----------------|----------------|------------------|-------------------|-----------------|
| 68576           | Hbxip          | 35            | 508             | 886              | 11359          | 41             | 629              | 925               | 11355           |
| 68585           | Rtn4           | 85            | 76              | 1336             | 1202           | 95             | 43               | 1165              | 1298            |
| 68588           | Cthrc1         | 8             | 4               | 24               | 40             | 8              | 3                | 21                | 133             |
| 68591           | Mocos          | 6             | 28              | 48               | 131            | 5              | 14               | 35                | 65              |
| 68598           | Dnajc8         | 125           | 2440            | 700              | 10980          | 139            | 2549             | 605               | 9087            |
| 68603           | Pmvk           | 18            | 455             | 72               | 1544           | 26             | 1039             | 100               | 2901            |
| 68606           | Ppm1f          | 58            | 1017            | 959              | 628            | 45             | 769              | 699               | 426             |
| 68607           | Serhl          | 18            | 132             | 70               | 307            | 17             | 180              | 85                | 411             |
| 68611           | Mrpl28         | 52            | 2960            | 1050             | 917            | 45             | 3711             | 1041              | 992             |
| 68612           | Ube2c          | 10            | 31              | 21               | 214            | 10             | 59               | 21                | 330             |
| 68614           | Letmd1         | 87            | 803             | 275              | 2870           | 85             | 597              | 222               | 2965            |
| 68626           | Elac2          | 82            | 1261            | 245              | 104            | 71             | 1020             | 187               | 85              |
| 68628           | Fbxw9          | 13            | 24              | 53               | 403            | 13             | 47               | 78                | 165             |
| 68631           | Cryl1          | 25            | 265             | 353              | 3634           | 22             | 222              | 277               | 3476            |
| 68632           | Myct1          | 5             | 3               | 32               | 29             | 4              | 3                | 28                | 34              |
| 68636           | Fahd1          | 9             | 42              | 87               | 570            | 9              | 70               | 119               | 682             |
| 68642           | 310441k11r     | 8             | 8               | 77               | 815            | 10             | 10               | 103               | 1052            |
| 68646           | l10020g09r     | 31            | 71              | 29               | 376            | 28             | 70               | 30                | 316             |
| 68652           | Map3k7ip2      | 336           | 511             | 866              | 916            | 338            | 385              | 719               | 668             |
| 68659           | l10032e23r     | 5             | 4               | 25               | 34             | 6              | 5                | 30                | 41              |
| 68662           | Scgb3a1        | 15            | 10              | 25               | 69             | 15             | 10               | 32                | 60              |
| 68667           | Trpm4          | 12            | 77              | 30               | 107            | 10             | 49               | 28                | 69              |
| 68668           | Klk5           | 5             | 3               | 25               | 121            | 6              | 3                | 27                | 131             |
| 68671           | Pcyt2          | 86            | 2888            | 240              | 2543           | 59             | 2124             | 149               | 1651            |
| 68673           | 110033f04r     | 12            | 7               | 23               | 16             | 12             | 8                | 21                | 20              |
| 68680           | l10028a07r     | 8             | 6               | 28               | 31             | 8              | 3                | 50                | 34              |
| 68681           | l10030e23r     | 36            | 218             | 226              | 85             | 30             | 133              | 179               | 67              |
| 68703           | Rere           | 120           | 411             | 76               | 2297           | 164            | 554              | 87                | 2944            |
| 68705           | Gtf2f2         | 54            | 163             | 643              | 249            | 59             | 197              | 640               | 346             |
| 68708           | Rabl2a         | 5             | 7               | 42               | 97             | 5              | 5                | 88                | 121             |
| 68709           | Cilp2          | 19            | 38              | 26               | 45             | 18             | 36               | 29                | 32              |
| 68713           | Ifitm1         | 10            | 101             | 49               | 44             | 12             | 97               | 74                | 58              |
| 68718           | Rnf166         | 178           | 1167            | 1761             | 211            | 78             | 328              | 672               | 97              |
| 68728           | Trp53inp2      | 34            | 21              | 32               | 537            | 53             | 95               | 50                | 1253            |
| 68729           | Trim37         | 44            | 77              | 18               | 783            | 61             | 67               | 23                | 713             |
| 68732           | Lrrc16         | 10            | 2               | 56               | 73             | 77             | 112              | 114               | 1596            |
| 68735           | Mrps18c        | 101           | 560             | 785              | 4558           | 109            | 502              | 848               | 4756            |
| 68742           | l10032o16r     | 38            | 1085            | 84               | 1322           | 52             | 1989             | 99                | 2223            |
| 68743           | Anln           | 6             | 3               | 38               | 40             | 8              | 3                | 61                | 51              |
| 68760           | Synpo2l        | 7             | 79              | 43               | 20             | 8              | 71               | 45                | 33              |
| 68767           | Orf19          | 39            | 936             | 197              | 601            | 32             | 635              | 148               | 442             |
| 68770           | Phtf2          | 50            | 61              | 281              | 212            | 138            | 154              | 912               | 512             |
| 68774           | Ms4a6d         | 7             | 8               | 104              | 544            | 6              | 3                | 34                | 141             |
| 68775           | Atp6v1c2       | 8             | 3               | 20               | 36             | 8              | 6                | 22                | 54              |
| 68776           | Taf11          | 24            | 483             | 688              | 7414           | 32             | 628              | 863               | 7875            |
| 68792           | Srpx2          | 6             | 5               | 25               | 34             | 7              | 3                | 31                | 28              |
| 68797           | Pdgfrl         | 6             | 8               | 28               | 21             | 7              | 10               | 21                | 31              |
| 68799           | Rgmb           | 49            | 73              | 24               | 123            | 17             | 10               | 22                | 49              |
| 68801           | Elov15         | 391           | 1777            | 2631             | 22559          | 197            | 819              | 1288              | 10192           |
| 68810           | Nexn           | 4             | 2               | 20               | 22             | 4              | 3                | 21                | 28              |
| 68813           | Dock5          | 15            | 8               | 27               | 124            | 10             | 6                | 28                | 49              |

| NCBI Gene ID | Gene Symbol | Affy. CD4+ | Agilent CD4+ | Illumina CD4+ | Nimbl. CD4+ | Affy. CD19+ | Agilent CD19+ | Illumina CD19+ | Nimbl. CD19+ |
|--------------|-------------|------------|--------------|---------------|-------------|-------------|---------------|----------------|--------------|
| 68816        | Ppil1       | 29         | 358          | 94            | 1287        | 40          | 628           | 122            | 1513         |
| 68828        | Sync        | 14         | 11           | 122           | 130         | 13          | 7             | 127            | 128          |
| 68833        | Pdcl3       | 51         | 319          | 20            | 6705        | 44          | 269           | 21             | 5053         |
| 68836        | Mrpl52      | 74         | 1707         | 510           | 165         | 76          | 1567          | 566            | 180          |
| 68842        | Tulp4       | 154        | 490          | 714           | 2151        | 115         | 306           | 478            | 978          |
| 68852        | 110067i12r  | 7          | 14           | 28            | 59          | 6           | 9             | 27             | 34           |
| 68854        | Asb11       | 7          | 5            | 24            | 45          | 7           | 4             | 20             | 107          |
| 68861        | l90002n15r  | 12         | 44           | 198           | 707         | 9           | 14            | 127            | 428          |
| 68867        | Rnf122      | 25         | 57           | 32            | 139         | 61          | 206           | 45             | 469          |
| 68877        | Maf1        | 206        | 2559         | 4835          | 1575        | 204         | 2992          | 4708           | 1482         |
| 68897        | Disp1       | 200        | 149          | 148           | 258         | 118         | 108           | 83             | 167          |
| 68910        | Zfp467      | 20         | 52           | 315           | 937         | 15          | 16            | 111            | 159          |
| 68911        | Pygo2       | 75         | 423          | 1851          | 363         | 55          | 302           | 1306           | 141          |
| 68915        | Vars2       | 47         | 141          | 396           | 306         | 41          | 153           | 368            | 272          |
| 68916        | Cdkal1      | 73         | 402          | 221           | 699         | 73          | 555           | 209            | 612          |
| 68917        | Hint2       | 22         | 303          | 812           | 642         | 21          | 318           | 821            | 618          |
| 68920        | l10065p20r  | 48         | 244          | 99            | 836         | 53          | 222           | 98             | 906          |
| 68922        | Dnaic1      | 7          | 81           | 24            | 34          | 8           | 70            | 33             | 38           |
| 68925        | Rpap1       | 57         | 499          | 166           | 1247        | 64          | 374           | 153            | 1366         |
| 68926        | Ubp2        | 271        | 344          | 1772          | 188         | 208         | 251           | 1455           | 200          |
| 68927        | Ptcd2       | 54         | 410          | 186           | 2420        | 47          | 472           | 141            | 2429         |
| 68929        | Mospd3      | 32         | 58           | 100           | 58          | 32          | 50            | 83             | 75           |
| 68936        | l90017o12r  | 81         | 862          | 20            | 2330        | 87          | 909           | 22             | 2828         |
| 68938        | Aspscr1     | 110        | 200          | 293           | 789         | 107         | 168           | 206            | 634          |
| 68943        | Pink1       | 74         | 605          | 434           | 6437        | 63          | 436           | 284            | 5794         |
| 68947        | Chst8       | 23         | 3            | 19            | 33          | 25          | 3             | 19             | 38           |
| 68948        | s00011h22r  | 28         | 199          | 37            | 3205        | 23          | 259           | 31             | 2990         |
| 68949        | 500012f01r  | 90         | 953          | 2387          | 5505        | 119         | 1696          | 4133           | 6809         |
| 68952        | s00016o10r  | 10         | 39           | 40            | 56          | 8           | 33            | 32             | 51           |
| 68955        | s00001a10r  | 9          | 130          | 37            | 34          | 9           | 50            | 37             | 43           |
| 68957        | Paqr6       | 22         | 20           | 28            | 543         | 20          | 22            | 33             | 472          |
| 68961        | Phkg2       | 116        | 1008         | 541           | 3348        | 133         | 968           | 494            | 3336         |
| 68964        | 500010j02r  | 49         | 123          | 311           | 382         | 71          | 219           | 523            | 763          |
| 68968        | Cdan1       | 56         | 93           | 89            | 397         | 56          | 97            | 98             | 448          |
| 68970        | Wdr40a      | 147        | 244          | 54            | 1421        | 221         | 457           | 70             | 2079         |
| 68971        | s00001m20r  | 36         | 593          | 669           | 2348        | 34          | 575           | 684            | 2663         |
| 68977        | Haghl       | 46         | 265          | 421           | 537         | 40          | 269           | 344            | 636          |
| 68981        | Snrpa1      | 88         | 229          | 244           | 11202       | 85          | 241           | 240            | 12512        |
| 68988        | Prpf31      | 59         | 1642         | 48            | 1775        | 73          | 1892          | 49             | 1687         |
| 68995        | Mcts1       | 45         | 2328         | 828           | 5132        | 45          | 2112          | 600            | 4775         |
| 69008        | Cab39l      | 79         | 392          | 245           | 633         | 106         | 622           | 369            | 905          |
| 69009        | Thap7       | 76         | 665          | 481           | 198         | 54          | 517           | 347            | 184          |
| 69010        | Anapc13     | 47         | 1634         | 559           | 3406        | 81          | 3564          | 876            | 4480         |
| 69017        | s000092e17r | 30         | 5763         | 490           | 15582       | 16          | 4762          | 354            | 13901        |
| 69024        | Snx15       | 42         | 469          | 54            | 280         | 43          | 442           | 45             | 188          |
| 69032        | Lyzl4       | 10         | 43           | 33            | 32          | 9           | 33            | 35             | 28           |
| 69035        | Zdhhc3      | 183        | 213          | 200           | 813         | 134         | 113           | 115            | 579          |
| 69036        | s10010m01r  | 5          | 21           | 27            | 43          | 5           | 23            | 32             | 38           |
| 69038        | s10006k21r  | 42         | 588          | 1620          | 4797        | 39          | 590           | 1540           | 5651         |
| 69048        | Slc30a5     | 99         | 363          | 575           | 1222        | 201         | 541           | 1122           | 2010         |
| 69049        | Cml5        | 4          | 2            | 31            | 34          | 5           | 3             | 28             | 34           |



| NCBI Gene ID | Gene Symbol | Affy. CD4+ | Agilent CD4+ | Illumina CD4+ | Nimbl. CD4+ | Affy. CD19+ | Agilent CD19+ | Illumina CD19+ | Nimbl. CD19+ |
|--------------|-------------|------------|--------------|---------------|-------------|-------------|---------------|----------------|--------------|
| 69051        | Pycr2       | 81         | 2299         | 100           | 3269        | 67          | 1593          | 67             | 2436         |
| 69060        | Pnlip       | 5          | 7            | 36            | 42          | 5           | 6             | 34             | 26           |
| 69064        | 310014f10r  | 10         | 79           | 255           | 4289        | 10          | 20            | 226            | 3906         |
| 69066        | 310010h24r  | 11         | 2            | 34            | 494         | 14          | 14            | 28             | 363          |
| 69068        | 310011o10r  | 4          | 7            | 28            | 49          | 5           | 10            | 27             | 34           |
| 69069        | 310011h11r  | 7          | 10           | 31            | 245         | 6           | 3             | 32             | 38           |
| 69072        | Ebna1bp2    | 82         | 1953         | 654           | 910         | 98          | 2450          | 732            | 778          |
| 69073        | 810019j16r  | 6          | 4            | 26            | 29          | 7           | 3             | 32             | 20           |
| 69077        | Psm11       | 203        | 2017         | 59            | 9601        | 201         | 2087          | 56             | 6495         |
| 69080        | Gmppa       | 59         | 201          | 492           | 875         | 79          | 205           | 461            | 983          |
| 69083        | Sult1c2     | 6          | 5            | 32            | 18          | 5           | 9             | 27             | 24           |
| 69085        | Zcchc9      | 101        | 352          | 193           | 6793        | 101         | 300           | 158            | 5231         |
| 69089        | Oxa1l       | 123        | 203          | 113           | 1949        | 179         | 273           | 133            | 2489         |
| 69090        | Ascc1       | 70         | 8            | 446           | 337         | 46          | 7             | 356            | 210          |
| 69097        | Trim15      | 5          | 2            | 21            | 33          | 6           | 3             | 24             | 43           |
| 69106        | Stoml1      | 36         | 152          | 58            | 201         | 62          | 606           | 64             | 459          |
| 69116        | 230096c10r  | 253        | 1444         | 99            | 1868        | 214         | 1416          | 78             | 1512         |
| 69117        | Adh6a       | 5          | 4            | 28            | 38          | 6           | 5             | 30             | 47           |
| 69121        | Chrdl2      | 7          | 3            | 23            | 25          | 7           | 3             | 20             | 32           |
| 69125        | Cnot8       | 108        | 314          | 22            | 2998        | 122         | 356           | 19             | 2594         |
| 69126        | 310022k09r  | 26         | 1628         | 1418          | 21901       | 22          | 1243          | 1895           | 19722        |
| 69129        | Pex11c      | 68         | 1012         | 349           | 156         | 48          | 824           | 254            | 209          |
| 69136        | Tusc1       | 35         | 30           | 120           | 58          | 27          | 25            | 94             | 63           |
| 69146        | Gsdmdc1     | 57         | 930          | 514           | 1155        | 60          | 775           | 441            | 1187         |
| 69147        | 200002j24r  | 6          | 3            | 17            | 30          | 6           | 3             | 21             | 36           |
| 69149        | Kbtbd3      | 7          | 91           | 45            | 30          | 7           | 65            | 43             | 33           |
| 69150        | Snx4        | 199        | 699          | 558           | 5841        | 135         | 413           | 384            | 4065         |
| 69151        | Lzic        | 31         | 204          | 123           | 63          | 32          | 287           | 133            | 75           |
| 69156        | Comtd1      | 19         | 393          | 27            | 616         | 19          | 408           | 31             | 1043         |
| 69159        | Rhebl1      | 13         | 314          | 84            | 568         | 12          | 384           | 100            | 450          |
| 69161        | Manbal      | 64         | 335          | 575           | 603         | 56          | 407           | 514            | 555          |
| 69163        | Mrpl44      | 41         | 568          | 278           | 1337        | 48          | 685           | 248            | 1526         |
| 69165        | Cd209b      | 6          | 15           | 47            | 90          | 5           | 6             | 43             | 155          |
| 69178        | Snx5        | 172        | 2167         | 75            | 4624        | 540         | 6959          | 214            | 11672        |
| 69183        | C1qtnf2     | 10         | 5            | 24            | 65          | 10          | 5             | 22             | 79           |
| 69189        | 310033b17r  | 6          | 447          | 32            | 50          | 6           | 300           | 29             | 64           |
| 69192        | Dhx16       | 123        | 1737         | 70            | 4998        | 128         | 1831          | 66             | 3801         |
| 69215        | Sat2        | 5          | 7            | 22            | 29          | 5           | 8             | 27             | 43           |
| 69217        | Plekha4     | 9          | 206          | 46            | 32          | 10          | 141           | 44             | 49           |
| 69219        | Ddah1       | 5          | 5            | 32            | 60          | 4           | 8             | 35             | 84           |
| 69226        | Snx24       | 6          | 3            | 27            | 21          | 5           | 3             | 36             | 21           |
| 69227        | 310407c02r  | 440        | 652          | 161           | 4320        | 519         | 729           | 169            | 4660         |
| 69237        | Gtpbp4      | 171        | 206          | 1012          | 1311        | 190         | 172           | 968            | 1087         |
| 69239        | 310034m16i  | 6          | 4            | 24            | 104         | 6           | 5             | 25             | 169          |
| 69253        | Hspb2       | 9          | 27           | 34            | 196         | 9           | 22            | 28             | 150          |
| 69256        | Zfp397      | 117        | 35           | 287           | 171         | 118         | 31            | 376            | 148          |
| 69257        | Elf2        | 118        | 350          | 154           | 4663        | 124         | 131           | 131            | 3274         |
| 69259        | Kctd5       | 64         | 223          | 104           | 1016        | 62          | 236           | 99             | 1006         |
| 69263        | Rfc3        | 19         | 13           | 72            | 460         | 38          | 49            | 171            | 1380         |
| 69269        | Scnm1       | 130        | 423          | 339           | 5488        | 106         | 438           | 288            | 4982         |
| 69274        | Ctdspl      | 15         | 19           | 37            | 235         | 12          | 8             | 29             | 81           |

| NCBI<br>Gene ID | Gene<br>Symbol | Affy.<br>CD4+ | Agilent<br>CD4+ | Illumina<br>CD4+ | Nimbl.<br>CD4+ | Affy.<br>CD19+ | Agilent<br>CD19+ | Illumina<br>CD19+ | Nimbl.<br>CD19+ |
|-----------------|----------------|---------------|-----------------|------------------|----------------|----------------|------------------|-------------------|-----------------|
| 69276           | Tloc1          | 148           | 332             | 26               | 9321           | 139            | 275              | 26                | 6624            |
| 69281           | Spata4         | 4             | 4               | 18               | 25             | 4              | 9                | 19                | 21              |
| 69287           | Odf3           | 10            | 97              | 37               | 34             | 9              | 94               | 35                | 34              |
| 69288           | Rhobtb1        | 8             | 5               | 26               | 119            | 8              | 35               | 53                | 73              |
| 69299           | Asb9           | 7             | 3               | 28               | 22             | 7              | 3                | 31                | 25              |
| 69307           | Pxt1           | 15            | 40              | 37               | 28             | 14             | 32               | 28                | 22              |
| 69309           | Slc16a13       | 24            | 12              | 43               | 94             | 24             | 16               | 34                | 57              |
| 69310           | Pacrg          | 5             | 5               | 24               | 29             | 5              | 3                | 24                | 40              |
| 69318           | 700007k09r     | 7             | 10              | 29               | 76             | 7              | 6                | 30                | 76              |
| 69324           | 700012b07r     | 7             | 5               | 26               | 142            | 6              | 3                | 30                | 186             |
| 69325           | 700012b09r     | 5             | 3               | 26               | 21             | 5              | 3                | 23                | 33              |
| 69352           | Efcbp1         | 7             | 3               | 18               | 19             | 6              | 3                | 23                | 20              |
| 69354           | Slc38a4        | 5             | 18              | 31               | 80             | 5              | 14               | 31                | 72              |
| 69367           | Glr2           | 186           | 220             | 345              | 48             | 149            | 199              | 268               | 42              |
| 69368           | Wdfy1          | 23            | 132             | 72               | 319            | 35             | 246              | 172               | 683             |
| 69372           | Mocs3          | 46            | 417             | 73               | 90             | 47             | 487              | 81                | 137             |
| 69380           | 700013g24r     | 8             | 31              | 24               | 25             | 8              | 22               | 31                | 33              |
| 69423           | 700019m22i     | 5             | 3               | 45               | 65             | 5              | 3                | 37                | 100             |
| 69440           | 700027j05r     | 37            | 135             | 319              | 250            | 44             | 157              | 342               | 326             |
| 69441           | 700023f06r     | 23            | 110             | 23               | 80             | 19             | 77               | 23                | 68              |
| 69444           | Lyzl6          | 5             | 6               | 23               | 24             | 4              | 5                | 23                | 22              |
| 69454           | Clic3          | 19            | 6               | 31               | 24             | 17             | 3                | 21                | 26              |
| 69456           | Commd10        | 18            | 114             | 151              | 118            | 18             | 108              | 132               | 149             |
| 69480           | Ttc9           | 5             | 2               | 30               | 37             | 5              | 3                | 28                | 55              |
| 69481           | 700029i08r     | 6             | 19              | 28               | 25             | 7              | 18               | 34                | 29              |
| 69482           | Nup35          | 41            | 654             | 24               | 1751           | 42             | 571              | 26                | 1142            |
| 69501           | Etd            | 6             | 8               | 20               | 16             | 6              | 8                | 25                | 23              |
| 69524           | Esam1          | 11            | 22              | 27               | 28             | 10             | 20               | 24                | 31              |
| 69527           | Mrps9          | 65            | 560             | 885              | 18934          | 58             | 482              | 736               | 18868           |
| 69534           | Avpi1          | 16            | 190             | 43               | 127            | 15             | 50               | 32                | 55              |
| 69536           | Hemk1          | 14            | 37              | 164              | 265            | 17             | 57               | 182               | 346             |
| 69537           | Dnase111       | 14            | 154             | 91               | 1340           | 17             | 139              | 92                | 1904            |
| 69538           | Antxr1         | 6             | 2               | 31               | 29             | 6              | 3                | 31                | 31              |
| 69539           | 700002d11r     | 26            | 26              | 26               | 49             | 24             | 3                | 27                | 36              |
| 69540           | Klk10          | 8             | 57              | 27               | 44             | 10             | 62               | 27                | 45              |
| 69543           | Capns2         | 5             | 2               | 26               | 40             | 8              | 4                | 26                | 106             |
| 69544           | Wdr5b          | 32            | 40              | 39               | 194            | 36             | 92               | 48                | 270             |
| 69550           | Bst2           | 94            | 1166            | 307              | 2008           | 63             | 660              | 225               | 1759            |
| 69554           | Klhdc2         | 125           | 281             | 451              | 3287           | 54             | 115              | 189               | 1703            |
| 69562           | Cdc2l5         | 266           | 122             | 440              | 2490           | 333            | 108              | 567               | 2583            |
| 69564           | Itgb1bp3       | 8             | 13              | 25               | 44             | 6              | 16               | 28                | 35              |
| 69568           | Vkorc111       | 117           | 81              | 98               | 905            | 123            | 102              | 94                | 799             |
| 69573           | 700016c08r     | 16            | 430             | 112              | 1703           | 12             | 233              | 68                | 1025            |
| 69578           | 700016g11r     | 7             | 3               | 31               | 35             | 6              | 3                | 32                | 64              |
| 69581           | Rhou           | 12            | 2               | 20               | 55             | 13             | 3                | 19                | 53              |
| 69597           | Afg3l2         | 102           | 146             | 144              | 717            | 99             | 186              | 152               | 751             |
| 69601           | Dab2ip         | 10            | 6               | 30               | 48             | 11             | 80               | 84                | 55              |
| 69602           | Otop3          | 11            | 6               | 31               | 116            | 11             | 4                | 29                | 101             |
| 69605           | Lnp            | 39            | 32              | 80               | 1079           | 36             | 32               | 84                | 1037            |
| 69608           | Sec24d         | 17            | 43              | 82               | 118            | 11             | 22               | 56                | 120             |
| 69617           | Pitrm1         | 118           | 375             | 20               | 2368           | 93             | 249              | 22                | 1535            |

| NCBI Gene ID | Gene Symbol | Affy. CD4+ | Agilent CD4+ | Illumina CD4+ | Nimbl. CD4+ | Affy. CD19+ | Agilent CD19+ | Illumina CD19+ | Nimbl. CD19+ |
|--------------|-------------|------------|--------------|---------------|-------------|-------------|---------------|----------------|--------------|
| 69632        | Arhgef12    | 35         | 43           | 27            | 288         | 30          | 37            | 24             | 1384         |
| 69634        | Clybl       | 28         | 63           | 25            | 1979        | 20          | 38            | 26             | 1295         |
| 69635        | Dapk1       | 40         | 77           | 41            | 1771        | 9           | 19            | 30             | 16           |
| 69638        | 310040a07r  | 15         | 173          | 22            | 85          | 17          | 167           | 23             | 101          |
| 69639        | Exosc8      | 122        | 946          | 1083          | 6463        | 102         | 831           | 940            | 5299         |
| 69640        | 310040c09r  | 9          | 9            | 30            | 46          | 10          | 14            | 113            | 143          |
| 69654        | Dctn2       | 94         | 489          | 1218          | 457         | 100         | 515           | 1217           | 447          |
| 69656        | Pir         | 7          | 5            | 47            | 53          | 6           | 4             | 42             | 50           |
| 69663        | Ddx51       | 54         | 372          | 327           | 114         | 64          | 391           | 299            | 154          |
| 69666        | 310047m15l  | 28         | 502          | 20            | 1552        | 30          | 699           | 20             | 2146         |
| 69672        | 310047h23r  | 55         | 1110         | 74            | 2521        | 42          | 577           | 50             | 1238         |
| 69677        | Ilf8        | 4          | 42           | 31            | 15          | 4           | 46            | 27             | 23           |
| 69681        | Cdk3        | 12         | 26           | 47            | 148         | 12          | 24            | 32             | 120          |
| 69683        | 310044h10r  | 91         | 1048         | 1205          | 1956        | 75          | 929           | 1029           | 3106         |
| 69693        | Pof1b       | 4          | 2            | 18            | 17          | 4           | 3             | 23             | 18           |
| 69694        | Tatdn1      | 16         | 65           | 24            | 4286        | 15          | 56            | 16             | 4785         |
| 69702        | Ndufaf1     | 48         | 232          | 462           | 1557        | 59          | 346           | 619            | 1697         |
| 69706        | Ppil5       | 5          | 4            | 31            | 21          | 4           | 12            | 29             | 23           |
| 69710        | Centd2      | 70         | 81           | 56            | 653         | 170         | 120           | 125            | 1439         |
| 69713        | Pin4        | 171        | 643          | 363           | 7007        | 112         | 601           | 293            | 8524         |
| 69714        | Tfpt        | 79         | 127          | 409           | 175         | 80          | 122           | 406            | 154          |
| 69716        | Trip13      | 10         | 38           | 23            | 209         | 18          | 128           | 27             | 283          |
| 69719        | Cad         | 77         | 481          | 86            | 198         | 92          | 549           | 94             | 212          |
| 69721        | Nkiras1     | 42         | 112          | 25            | 7904        | 33          | 92            | 23             | 6487         |
| 69726        | Smyd3       | 100        | 350          | 60            | 1195        | 58          | 240           | 39             | 878          |
| 69731        | Gemin7      | 48         | 837          | 101           | 1007        | 70          | 1481          | 154            | 2618         |
| 69736        | Nup37       | 27         | 129          | 124           | 2412        | 25          | 127           | 115            | 1980         |
| 69737        | Ttl         | 19         | 31           | 32            | 61          | 17          | 35            | 29             | 43           |
| 69745        | Pold4       | 42         | 271          | 303           | 1689        | 217         | 1430          | 1143           | 9019         |
| 69752        | Zfp511      | 116        | 1160         | 836           | 1710        | 124         | 1177          | 866            | 1823         |
| 69754        | Fbxo7       | 103        | 439          | 165           | 3609        | 90          | 432           | 133            | 2173         |
| 69757        | Leng1       | 21         | 377          | 137           | 2352        | 19          | 287           | 112            | 2177         |
| 69774        | Ms4a6b      | 951        | 12992        | 443           | 21292       | 74          | 910           | 51             | 2299         |
| 69785        | Ceacam13    | 4          | 11           | 33            | 35          | 4           | 40            | 33             | 54           |
| 69787        | Anxa13      | 5          | 10           | 20            | 20          | 6           | 16            | 22             | 33           |
| 69792        | Med6        | 56         | 65           | 351           | 1359        | 71          | 85            | 405            | 1218         |
| 69802        | Cox11       | 49         | 370          | 135           | 1575        | 46          | 365           | 136            | 1547         |
| 69806        | Slc39a11    | 42         | 302          | 226           | 1177        | 23          | 127           | 91             | 399          |
| 69807        | Trim32      | 15         | 93           | 38            | 165         | 9           | 36            | 30             | 68           |
| 69814        | Prss32      | 11         | 17           | 23            | 44          | 11          | 23            | 24             | 55           |
| 69815        | Krtcap3     | 53         | 1036         | 466           | 1787        | 44          | 645           | 259            | 1072         |
| 69826        | Ms4a10      | 17         | 10           | 20            | 30          | 18          | 12            | 24             | 23           |
| 69836        | Pla2g12b    | 5          | 12           | 24            | 20          | 6           | 21            | 24             | 30           |
| 69852        | Tcf23       | 12         | 4            | 45            | 25          | 12          | 3             | 35             | 36           |
| 69863        | 310054d07r  | 72         | 34           | 86            | 525         | 48          | 24            | 53             | 259          |
| 69865        | 310073h04r  | 5          | 2            | 23            | 32          | 4           | 3             | 22             | 37           |
| 69875        | Ndufa11     | 78         | 130          | 665           | 512         | 71          | 141           | 608            | 652          |
| 69882        | 310321m09l  | 75         | 333          | 500           | 904         | 75          | 279           | 464            | 842          |
| 69885        | 310002d18r  | 21         | 4            | 26            | 52          | 23          | 11            | 27             | 85           |
| 69888        | Cyp2c66     | 6          | 12           | 27            | 15          | 7           | 18            | 25             | 21           |
| 69890        | Zfp219      | 26         | 377          | 262           | 80          | 25          | 157           | 110            | 78           |

| NCBI<br>Gene ID | Gene<br>Symbol | Affy.<br>CD4+ | Agilent<br>CD4+ | Illumina<br>CD4+ | Nimbl.<br>CD4+ | Affy.<br>CD19+ | Agilent<br>CD19+ | Illumina<br>CD19+ | Nimbl.<br>CD19+ |
|-----------------|----------------|---------------|-----------------|------------------|----------------|----------------|------------------|-------------------|-----------------|
| 69903           | Rasip1         | 11            | 11              | 33               | 25             | 11             | 6                | 29                | 24              |
| 69908           | Rab3b          | 6             | 10              | 24               | 206            | 6              | 17               | 29                | 118             |
| 69912           | Nup43          | 25            | 26              | 252              | 798            | 25             | 28               | 237               | 668             |
| 69920           | Polr2i         | 17            | 1188            | 271              | 3103           | 19             | 1734             | 309               | 4575            |
| 69922           | Vrk2           | 43            | 56              | 191              | 1643           | 56             | 59               | 221               | 1898            |
| 69934           | Rg9mtd3        | 43            | 177             | 30               | 500            | 38             | 135              | 22                | 415             |
| 69938           | Scrn1          | 7             | 6               | 37               | 28             | 7              | 7                | 36                | 39              |
| 69957           | Cdc16          | 49            | 661             | 247              | 5972           | 58             | 738              | 216               | 4927            |
| 69976           | Galk2          | 39            | 455             | 35               | 275            | 30             | 309              | 29                | 175             |
| 69982           | Spink2         | 8             | 3               | 28               | 37             | 8              | 4                | 26                | 32              |
| 69993           | Chn2           | 24            | 47              | 78               | 858            | 11             | 6                | 29                | 322             |
| 70008           | Ace2           | 4             | 4               | 25               | 30             | 4              | 4                | 23                | 36              |
| 70009           | Ssty2          | 12            | 3               | 23               | 390            | 12             | 4                | 22                | 379             |
| 70024           | Mcm10          | 10            | 22              | 30               | 54             | 11             | 118              | 34                | 108             |
| 70026           | Bzrpl1         | 5             | 173             | 28               | 125            | 5              | 202              | 24                | 193             |
| 70047           | Trnt1          | 52            | 582             | 389              | 1940           | 77             | 698              | 552               | 2700            |
| 70052           | Prpf4          | 117           | 723             | 138              | 465            | 112            | 794              | 122               | 347             |
| 70061           | Sdro           | 5             | 3               | 21               | 72             | 5              | 3                | 22                | 17              |
| 70078           | Nol7           | 65            | 1583            | 81               | 1430           | 68             | 2299             | 98                | 1944            |
| 70083           | Metrn          | 32            | 107             | 78               | 97             | 27             | 89               | 57                | 89              |
| 70086           | Cysltr2        | 4             | 8               | 24               | 26             | 4              | 8                | 23                | 33              |
| 70097           | Sash1          | 8             | 5               | 67               | 69             | 11             | 9                | 62                | 75              |
| 70101           | Cyp4f16        | 10            | 30              | 42               | 233            | 9              | 22               | 38                | 149             |
| 70103           | Znhit1         | 32            | 128             | 97               | 921            | 25             | 149              | 85                | 1065            |
| 70110           | Ifi35          | 73            | 589             | 212              | 10758          | 73             | 554              | 188               | 11240           |
| 70122           | Mllt3          | 259           | 1311            | 311              | 5576           | 57             | 263              | 86                | 952             |
| 70144           | Lrch3          | 312           | 15              | 44               | 281            | 223            | 4                | 34                | 181             |
| 70155           | Ogfrl1         | 7             | 7               | 42               | 185            | 9              | 147              | 605               | 4080            |
| 70163           | 210415f13r     | 6             | 5               | 23               | 20             | 6              | 7                | 20                | 18              |
| 70223           | Nars           | 273           | 326             | 456              | 3339           | 257            | 194              | 378               | 2819            |
| 70225           | Ppil3          | 69            | 166             | 611              | 11561          | 68             | 161              | 511               | 8928            |
| 70231           | Gorasp2        | 216           | 504             | 566              | 1233           | 353            | 837              | 877               | 1898            |
| 70233           | Cd2bp2         | 75            | 390             | 706              | 431            | 71             | 457              | 754               | 489             |
| 70237           | Bhlhb9         | 24            | 123             | 341              | 85             | 15             | 87               | 233               | 52              |
| 70239           | Gtf3c5         | 17            | 508             | 48               | 108            | 16             | 381              | 47                | 145             |
| 70240           | 700038n03r     | 13            | 24              | 36               | 193            | 13             | 50               | 46                | 156             |
| 70247           | Psmc1          | 141           | 261             | 1624             | 4050           | 161            | 244              | 1750              | 3807            |
| 70248           | Dazap1         | 215           | 708             | 2268             | 14464          | 190            | 699              | 2105              | 12727           |
| 70257           | 10107e04r      | 244           | 1709            | 3263             | 21499          | 201            | 1197             | 2863              | 22107           |
| 70266           | Ccbl1          | 23            | 306             | 108              | 240            | 21             | 190              | 70                | 100             |
| 70274           | Ly6g6e         | 16            | 4               | 22               | 73             | 18             | 3                | 23                | 96              |
| 70294           | Rnf126         | 138           | 299             | 78               | 139            | 139            | 265              | 57                | 133             |
| 70296           | Tbc1d13        | 90            | 1335            | 318              | 565            | 94             | 1496             | 288               | 552             |
| 70310           | Plscr3         | 37            | 399             | 28               | 164            | 33             | 210              | 28                | 150             |
| 70314           | Rabep2         | 39            | 1014            | 163              | 320            | 100            | 4416             | 608               | 1193            |
| 70315           | Hdac8          | 80            | 27              | 31               | 630            | 64             | 34               | 28                | 559             |
| 70316           | Ndufab1        | 92            | 633             | 47               | 4837           | 89             | 594              | 53                | 5323            |
| 70325           | Pigw           | 44            | 15              | 29               | 77             | 38             | 14               | 26                | 54              |
| 70348           | 610018i03r     | 40            | 88              | 181              | 196            | 31             | 62               | 132               | 111             |
| 70349           | Copb1          | 229           | 572             | 61               | 295            | 241            | 550              | 53                | 235             |
| 70350           | Baspl          | 33            | 3               | 262              | 91             | 28             | 2                | 125               | 85              |

| NCBI Gene ID | Gene Symbol | Affy. CD4+ | Agilent CD4+ | Illumina CD4+ | Nimbl. CD4+ | Affy. CD19+ | Agilent CD19+ | Illumina CD19+ | Nimbl. CD19+ |
|--------------|-------------|------------|--------------|---------------|-------------|-------------|---------------|----------------|--------------|
| 70351        | Ppp4r1      | 189        | 416          | 439           | 815         | 254         | 497           | 504            | 977          |
| 70354        | 110001i20r  | 71         | 66           | 23            | 5136        | 58          | 46            | 22             | 3242         |
| 70355        | Gprc5c      | 12         | 56           | 29            | 65          | 12          | 56            | 29             | 70           |
| 70356        | St13        | 168        | 1225         | 466           | 13486       | 185         | 1382          | 475            | 11016        |
| 70357        | Kcnip1      | 6          | 7            | 36            | 30          | 5           | 6             | 37             | 28           |
| 70359        | Gtpbp3      | 18         | 428          | 193           | 1173        | 19          | 439           | 202            | 1214         |
| 70361        | Lman1       | 39         | 336          | 266           | 146         | 58          | 517           | 351            | 171          |
| 70363        | 700010c24r  | 5          | 7            | 25            | 21          | 6           | 6             | 25             | 22           |
| 70369        | Bag5        | 42         | 798          | 362           | 1190        | 38          | 758           | 287            | 934          |
| 70370        | 500015h20r  | 13         | 33           | 39            | 101         | 12          | 29            | 22             | 95           |
| 70380        | Mospd1      | 94         | 170          | 73            | 1304        | 128         | 173           | 73             | 1218         |
| 70382        | Kctd2       | 81         | 875          | 1176          | 378         | 49          | 486           | 735            | 190          |
| 70383        | Cox10       | 51         | 20           | 721           | 812         | 44          | 10            | 361            | 278          |
| 70392        | Asb12       | 5          | 3            | 25            | 49          | 5           | 3             | 25             | 24           |
| 70394        | Kptn        | 21         | 627          | 141           | 739         | 21          | 709           | 141            | 719          |
| 70405        | Calml3      | 5          | 2            | 52            | 19          | 6           | 3             | 51             | 23           |
| 70408        | Polr3f      | 39         | 57           | 116           | 1765        | 34          | 63            | 127            | 1282         |
| 70415        | 510018g03r  | 141        | 127          | 33            | 201         | 81          | 53            | 31             | 76           |
| 70425        | Csnk1g3     | 74         | 1038         | 781           | 961         | 171         | 1771          | 1594           | 1792         |
| 70428        | Polr3b      | 130        | 374          | 533           | 554         | 116         | 407           | 554            | 413          |
| 70430        | Tbce        | 77         | 36           | 26            | 1531        | 86          | 55            | 28             | 1411         |
| 70432        | Rufy2       | 95         | 10           | 142           | 806         | 56          | 3             | 106            | 427          |
| 70435        | 10204m08i   | 35         | 404          | 79            | 139         | 34          | 231           | 62             | 118          |
| 70439        | Taf15       | 219        | 520          | 728           | 682         | 250         | 354           | 726            | 518          |
| 70458        | 510318n02r  | 11         | 9            | 82            | 178         | 15          | 17            | 128            | 317          |
| 70472        | Atad2       | 54         | 382          | 31            | 5314        | 60          | 437           | 34             | 4568         |
| 70478        | Mipep       | 28         | 200          | 243           | 273         | 31          | 239           | 349            | 306          |
| 70481        | Pnma1       | 36         | 3            | 31            | 71          | 37          | 3             | 41             | 46           |
| 70495        | Atp6ap2     | 73         | 372          | 123           | 8666        | 70          | 270           | 102            | 6851         |
| 70497        | Arhgap17    | 87         | 414          | 1473          | 888         | 405         | 1967          | 5233           | 4254         |
| 70508        | Bbx         | 55         | 96           | 233           | 3700        | 73          | 73            | 322            | 3564         |
| 70527        | Stambp      | 38         | 247          | 354           | 1219        | 33          | 194           | 239            | 767          |
| 70530        | Lrfn2       | 11         | 6            | 38            | 40          | 11          | 3             | 32             | 42           |
| 70536        | Qpct        | 5          | 25           | 21            | 88          | 5           | 5             | 16             | 23           |
| 70544        | 730437n04r  | 41         | 162          | 541           | 1747        | 51          | 222           | 645            | 2286         |
| 70546        | Zdhhc2      | 6          | 15           | 61            | 63          | 5           | 6             | 38             | 31           |
| 70549        | Tln2        | 7          | 4            | 31            | 39          | 6           | 8             | 28             | 34           |
| 70559        | 730442p18r  | 27         | 3            | 23            | 195         | 28          | 9             | 24             | 236          |
| 70560        | Wars2       | 37         | 39           | 70            | 777         | 38          | 59            | 75             | 720          |
| 70571        | Tcerg1l     | 9          | 5            | 26            | 38          | 10          | 4             | 23             | 65           |
| 70584        | Pak4        | 32         | 81           | 162           | 196         | 35          | 98            | 188            | 125          |
| 70591        | 730455p16r  | 20         | 36           | 136           | 917         | 23          | 37            | 133            | 1114         |
| 70594        | 730460c07r  | 5          | 2            | 24            | 20          | 6           | 3             | 27             | 36           |
| 70599        | Ssfa2       | 57         | 17           | 152           | 764         | 84          | 27            | 233            | 732          |
| 70603        | Mutyh       | 23         | 66           | 132           | 204         | 25          | 90            | 182            | 297          |
| 70611        | Fbxo33      | 89         | 483          | 391           | 5655        | 83          | 340           | 348            | 4995         |
| 70616        | Sf4         | 58         | 1774         | 1254          | 3328        | 57          | 1604          | 940            | 2656         |
| 70617        | 730508b09r  | 37         | 131          | 141           | 1035        | 34          | 134           | 142            | 721          |
| 70620        | Ube2v2      | 92         | 86           | 26            | 4683        | 81          | 77            | 29             | 3476         |
| 70626        | 730522e02r  | 4          | 76           | 25            | 17          | 5           | 69            | 24             | 21           |
| 70650        | Zcchc8      | 114        | 284          | 465           | 814         | 104         | 221           | 432            | 557          |

| NCBI Gene ID | Gene Symbol | Affy. CD4+ | Agilent CD4+ | Illumina CD4+ | Nimbl. CD4+ | Affy. CD19+ | Agilent CD19+ | Illumina CD19+ | Nimbl. CD19+ |
|--------------|-------------|------------|--------------|---------------|-------------|-------------|---------------|----------------|--------------|
| 70673        | Prdm16      | 13         | 138          | 20            | 189         | 12          | 52            | 15             | 53           |
| 70676        | Gulp1       | 4          | 41           | 24            | 31          | 4           | 44            | 24             | 49           |
| 70686        | Dusp16      | 17         | 10           | 49            | 155         | 94          | 103           | 393            | 2570         |
| 70691        | 330403n18r  | 4          | 2            | 18            | 3396        | 4           | 3             | 21             | 3384         |
| 70726        | Angptl6     | 9          | 231          | 107           | 951         | 9           | 123           | 59             | 606          |
| 70750        | Fvt1        | 91         | 638          | 532           | 538         | 57          | 482           | 366            | 316          |
| 70757        | Ptplb       | 27         | 134          | 152           | 8985        | 30          | 146           | 136            | 8040         |
| 70767        | Prpf3       | 77         | 698          | 357           | 1140        | 77          | 556           | 368            | 943          |
| 70769        | Nolc1       | 87         | 304          | 119           | 623         | 79          | 253           | 104            | 542          |
| 70771        | Gpr173      | 6          | 49           | 21            | 80          | 6           | 44            | 22             | 66           |
| 70779        | Prdm5       | 8          | 2            | 29            | 123         | 8           | 3             | 29             | 39           |
| 70789        | Kynu        | 6          | 2            | 22            | 28          | 170         | 90            | 389            | 3230         |
| 70791        | Hars2       | 63         | 287          | 200           | 3824        | 67          | 240           | 148            | 3683         |
| 70796        | Zdhhc1      | 10         | 35           | 22            | 91          | 10          | 26            | 23             | 115          |
| 70797        | Ankib1      | 207        | 332          | 35            | 2602        | 153         | 251           | 32             | 2058         |
| 70807        | Arrdc2      | 17         | 66           | 170           | 244         | 13          | 38            | 121            | 139          |
| 70823        | Hmgb2l1     | 59         | 108          | 505           | 1208        | 62          | 137           | 618            | 1099         |
| 70834        | Spag9       | 106        | 407          | 89            | 1603        | 225         | 840           | 119            | 2434         |
| 70835        | Prss22      | 13         | 88           | 28            | 101         | 13          | 72            | 28             | 128          |
| 70839        | P2ry12      | 7          | 2            | 24            | 38          | 7           | 3             | 25             | 180          |
| 70840        | Slc22a16    | 6          | 135          | 29            | 39          | 7           | 114           | 32             | 95           |
| 70845        | 21508d12r   | 7          | 2            | 28            | 16          | 7           | 3             | 29             | 19           |
| 70859        | 21509b22r   | 4          | 2            | 17            | 33          | 4           | 4             | 18             | 45           |
| 70874        | 921513i03r  | 5          | 4            | 25            | 23          | 5           | 4             | 26             | 21           |
| 70881        | Nt5c1b      | 4          | 4            | 24            | 38          | 4           | 6             | 28             | 45           |
| 70882        | Armc3       | 5          | 283          | 125           | 21          | 5           | 390           | 149            | 33           |
| 70901        | 921524l21r  | 5          | 5            | 27            | 36          | 5           | 5             | 29             | 33           |
| 70911        | Phyhipl     | 5          | 4            | 31            | 38          | 6           | 4             | 29             | 27           |
| 70920        | 21511h03r   | 5          | 18           | 21            | 21          | 4           | 14            | 19             | 19           |
| 70930        | Nol8        | 127        | 379          | 761           | 2465        | 117         | 277           | 747            | 1965         |
| 70935        | Speer4f     | 5          | 3            | 24            | 31          | 5           | 3             | 27             | 58           |
| 70951        | Spata1      | 11         | 201          | 22            | 1251        | 8           | 121           | 27             | 958          |
| 70952        | 21537p18r   | 5          | 2            | 24            | 22          | 4           | 8             | 26             | 26           |
| 70974        | Pgm2l1      | 59         | 181          | 59            | 682         | 51          | 133           | 52             | 541          |
| 70977        | 31407g18r   | 5          | 2            | 24            | 20          | 5           | 5             | 23             | 22           |
| 70993        | 31432m23r   | 7          | 32           | 24            | 19          | 7           | 37            | 23             | 23           |
| 70998        | Phf6        | 73         | 1634         | 163           | 937         | 86          | 1004          | 202            | 1037         |
| 71001        | 931440l10r  | 7          | 6            | 45            | 18          | 7           | 8             | 36             | 18           |
| 71003        | 31440b09r   | 13         | 18           | 22            | 22          | 13          | 20            | 17             | 28           |
| 71020        | Spats1      | 7          | 8            | 20            | 40          | 7           | 9             | 21             | 39           |
| 71026        | Speer3      | 4          | 3            | 24            | 90          | 4           | 5             | 24             | 96           |
| 71037        | 933401f05r  | 5          | 7            | 20            | 198         | 6           | 6             | 28             | 288          |
| 71062        | Tekt3       | 6          | 2            | 38            | 20          | 6           | 3             | 41             | 38           |
| 71063        | Zfp597      | 47         | 10           | 325           | 1948        | 67          | 12            | 454            | 1584         |
| 71078        | Adam30      | 9          | 7            | 58            | 18          | 10          | 14            | 51             | 28           |
| 71085        | Arhgap19    | 10         | 5            | 50            | 24          | 10          | 8             | 71             | 28           |
| 71091        | Cdkl1       | 6          | 13           | 26            | 49          | 18          | 88            | 30             | 102          |
| 71093        | Atoh8       | 20         | 9            | 22            | 27          | 18          | 13            | 21             | 28           |
| 71096        | Sntg1       | 6          | 4            | 29            | 27          | 6           | 4             | 30             | 22           |
| 71111        | Gpr39       | 5          | 3            | 25            | 76          | 5           | 3             | 25             | 71           |
| 71116        | Stx18       | 38         | 468          | 86            | 1811        | 39          | 505           | 80             | 1565         |

| NCBI Gene ID | Gene Symbol | Affy. CD4+ | Agilent CD4+ | Illumina CD4+ | Nimbl. CD4+ | Affy. CD19+ | Agilent CD19+ | Illumina CD19+ | Nimbl. CD19+ |
|--------------|-------------|------------|--------------|---------------|-------------|-------------|---------------|----------------|--------------|
| 71132        | Cabyr       | 4          | 6            | 40            | 79          | 5           | 9             | 32             | 59           |
| 71137        | Rfx4        | 6          | 39           | 28            | 26          | 6           | 30            | 22             | 39           |
| 71141        | 933407l21r  | 11         | 9            | 26            | 46          | 11          | 16            | 22             | 41           |
| 71164        | Zdhhc11     | 5          | 3            | 30            | 19          | 6           | 3             | 29             | 18           |
| 71177        | 933424b01r  | 163        | 531          | 170           | 250         | 163         | 484           | 136            | 142          |
| 71207        | Nudt4       | 37         | 78           | 98            | 532         | 39          | 112           | 118            | 499          |
| 71233        | 933434i06r  | 5          | 4            | 32            | 158         | 5           | 4             | 30             | 364          |
| 71238        | Acn9        | 18         | 24           | 108           | 518         | 21          | 38            | 175            | 799          |
| 71240        | Osbpl7      | 57         | 1334         | 35            | 164         | 57          | 1485          | 32             | 193          |
| 71241        | Dmrtc2      | 12         | 8            | 31            | 39          | 11          | 3             | 30             | 68           |
| 71242        | l33400g04r  | 11         | 25           | 63            | 269         | 12          | 104           | 219            | 1591         |
| 71263        | Mro         | 6          | 6            | 30            | 39          | 7           | 10            | 30             | 29           |
| 71268        | Lrrfip2     | 34         | 38           | 63            | 1367        | 39          | 44            | 84             | 1799         |
| 71279        | Slc29a3     | 57         | 17           | 778           | 41          | 72          | 16            | 1077           | 74           |
| 71296        | 933436c20r  | 8          | 5            | 25            | 99          | 6           | 4             | 24             | 60           |
| 71300        | Rnf148      | 5          | 27           | 27            | 29          | 4           | 26            | 26             | 45           |
| 71307        | 700018a04r  | 6          | 6            | 31            | 19          | 5           | 6             | 33             | 15           |
| 71313        | Fsip1       | 6          | 2            | 29            | 19          | 7           | 17            | 26             | 85           |
| 71326        | Trem1       | 25         | 30           | 22            | 130         | 26          | 24            | 25             | 112          |
| 71330        | Rcbtb1      | 200        | 981          | 43            | 2822        | 75          | 330           | 41             | 1070         |
| 71336        | Rbks        | 40         | 166          | 149           | 271         | 35          | 130           | 149            | 208          |
| 71340        | Riok1       | 99         | 472          | 436           | 2393        | 110         | 434           | 410            | 2390         |
| 71354        | Wdr31       | 8          | 9            | 30            | 24          | 8           | 5             | 31             | 22           |
| 71355        | Col24a1     | 13         | 3            | 25            | 84          | 13          | 3             | 22             | 155          |
| 71367        | Chst9       | 4          | 2            | 22            | 21          | 4           | 3             | 21             | 25           |
| 71371        | Arid5b      | 177        | 233          | 274           | 4717        | 203         | 212           | 341            | 5962         |
| 71382        | Pex1        | 25         | 261          | 22            | 581         | 27          | 195           | 23             | 655          |
| 71393        | Kctd6       | 41         | 73           | 171           | 189         | 42          | 59            | 120            | 82           |
| 71395        | l30419d17r  | 9          | 2            | 28            | 17          | 10          | 3             | 32             | 16           |
| 71409        | Fmn1        | 5          | 15           | 33            | 143         | 5           | 17            | 33             | 122          |
| 71412        | Dhrs2       | 7          | 3            | 14            | 19          | 7           | 3             | 15             | 22           |
| 71435        | Arhgap21    | 10         | 11           | 49            | 20          | 24          | 47            | 244            | 59           |
| 71436        | Flrt3       | 6          | 3            | 24            | 95          | 5           | 3             | 24             | 56           |
| 71446        | Wrb         | 24         | 150          | 172           | 1175        | 23          | 167           | 143            | 863          |
| 71458        | Bcor        | 65         | 806          | 320           | 1875        | 58          | 683           | 314            | 1701         |
| 71461        | Ptk7        | 8          | 30           | 25            | 31          | 10          | 19            | 24             | 29           |
| 71472        | Usp19       | 241        | 346          | 314           | 1768        | 233         | 377           | 341            | 1334         |
| 71492        | Bbs7        | 6          | 2            | 33            | 37          | 7           | 3             | 30             | 34           |
| 71514        | Sfpq        | 748        | 2580         | 1902          | 4267        | 752         | 3016          | 1720           | 3903         |
| 71519        | Cyp2u1      | 6          | 14           | 32            | 77          | 6           | 14            | 29             | 93           |
| 71520        | Grap        | 187        | 2576         | 205           | 4881        | 350         | 4872          | 334            | 7131         |
| 71538        | Fbxo9       | 95         | 842          | 588           | 2438        | 67          | 661           | 383            | 1364         |
| 71544        | 030420j04r  | 4          | 124          | 29            | 21          | 4           | 46            | 26             | 26           |
| 71562        | Afmid       | 28         | 74           | 151           | 1969        | 36          | 113           | 154            | 3088         |
| 71564        | 030607l17r  | 52         | 182          | 217           | 813         | 34          | 151           | 125            | 404          |
| 71566        | 930425e11r  | 7          | 21           | 49            | 57          | 8           | 12            | 51             | 50           |
| 71578        | Sval1       | 4          | 7            | 21            | 20          | 4           | 17            | 27             | 21           |
| 71584        | Gdpd2       | 9          | 5            | 22            | 44          | 8           | 3             | 22             | 57           |
| 71586        | Ifih1       | 55         | 140          | 27            | 163         | 14          | 29            | 19             | 125          |
| 71592        | Pogk        | 12         | 8            | 85            | 104         | 9           | 5             | 62             | 194          |
| 71599        | Senp8       | 6          | 59           | 35            | 609         | 6           | 73            | 37             | 693          |

| NCBI Gene ID | Gene Symbol | Affy. CD4+ | Agilent CD4+ | Illumina CD4+ | Nimbl. CD4+ | Affy. CD19+ | Agilent CD19+ | Illumina CD19+ | Nimbl. CD19+ |
|--------------|-------------|------------|--------------|---------------|-------------|-------------|---------------|----------------|--------------|
| 71602        | Myo1e       | 13         | 8            | 45            | 35          | 444         | 425           | 1818           | 1251         |
| 71607        | l30017c17r  | 49         | 2509         | 504           | 257         | 65          | 3441          | 772            | 436          |
| 71617        | l30011e15r  | 46         | 24           | 86            | 179         | 57          | 35            | 114            | 128          |
| 71643        | 30422g04r   | 16         | 29           | 70            | 282         | 23          | 48            | 105            | 586          |
| 71648        | Optn        | 11         | 7            | 27            | 28          | 14          | 30            | 40             | 150          |
| 71660        | Rarres2     | 12         | 73           | 21            | 330         | 14          | 77            | 23             | 496          |
| 71665        | Fuca1       | 47         | 283          | 26            | 1579        | 128         | 1003          | 27             | 5229         |
| 71670        | Acy3        | 11         | 17           | 34            | 76          | 11          | 10            | 26             | 73           |
| 71675        | 510010f05r  | 11         | 9            | 57            | 27          | 12          | 15            | 95             | 53           |
| 71678        | 510010k06r  | 126        | 163          | 683           | 8097        | 177         | 182           | 944            | 10172        |
| 71679        | Atp5h       | 429        | 7597         | 4911          | 15794       | 355         | 5975          | 4005           | 13966        |
| 71683        | Gypc        | 82         | 353          | 207           | 379         | 67          | 284           | 181            | 342          |
| 71685        | Galnt14     | 6          | 6            | 35            | 54          | 7           | 67            | 33             | 237          |
| 71687        | Tmem25      | 13         | 2            | 37            | 107         | 13          | 3             | 40             | 71           |
| 71690        | Esm1        | 6          | 4            | 26            | 36          | 6           | 3             | 21             | 34           |
| 71693        | Colec11     | 12         | 12           | 25            | 157         | 13          | 14            | 21             | 133          |
| 71699        | Slc41a3     | 45         | 147          | 114           | 148         | 28          | 51            | 57             | 68           |
| 71701        | Pnpt1       | 77         | 614          | 52            | 1839        | 82          | 551           | 45             | 1571         |
| 71702        | Cdc5l       | 138        | 2117         | 1326          | 880         | 151         | 2145          | 1401           | 735          |
| 71703        | Armcx3      | 38         | 53           | 76            | 201         | 48          | 64            | 93             | 152          |
| 71704        | Arhgef3     | 163        | 552          | 3499          | 715         | 225         | 816           | 4327           | 931          |
| 71711        | Mus81       | 65         | 246          | 76            | 1145        | 47          | 141           | 60             | 934          |
| 71712        | 200002n14r  | 12         | 2            | 25            | 22          | 12          | 3             | 27             | 18           |
| 71713        | Cdc40       | 125        | 86           | 465           | 1923        | 123         | 86            | 487            | 1446         |
| 71715        | Dhx35       | 83         | 324          | 35            | 173         | 77          | 348           | 39             | 156          |
| 71720        | Osbpl3      | 8          | 9            | 34            | 25          | 7           | 3             | 33             | 31           |
| 71722        | Cic         | 184        | 367          | 435           | 90          | 192         | 326           | 323            | 82           |
| 71723        | Dhx34       | 36         | 345          | 256           | 361         | 46          | 560           | 363            | 469          |
| 71724        | Aox3        | 7          | 2            | 48            | 17          | 6           | 3             | 37             | 17           |
| 71726        | Smug1       | 14         | 73           | 197           | 276         | 14          | 93            | 196            | 199          |
| 71728        | Stk11ip     | 42         | 193          | 50            | 1605        | 78          | 384           | 99             | 3271         |
| 71729        | Rgs12       | 7          | 57           | 34            | 201         | 7           | 61            | 32             | 246          |
| 71732        | Vps11       | 115        | 1061         | 460           | 3160        | 139         | 1052          | 472            | 3209         |
| 71733        | Susd2       | 24         | 5            | 62            | 234         | 12          | 3             | 45             | 67           |
| 71738        | Mamdc2      | 4          | 9            | 29            | 32          | 4           | 9             | 29             | 64           |
| 71740        | Pvrl4       | 14         | 11           | 23            | 51          | 12          | 13            | 24             | 58           |
| 71743        | Coasy       | 21         | 309          | 224           | 989         | 22          | 465           | 287            | 1582         |
| 71745        | Cul2        | 55         | 35           | 118           | 312         | 57          | 31            | 126            | 265          |
| 71746        | Rgl3        | 12         | 52           | 24            | 27          | 12          | 43            | 27             | 26           |
| 71749        | Adh6-ps1    | 5          | 3            | 22            | 22          | 5           | 4             | 19             | 19           |
| 71751        | Map3k13     | 8          | 107          | 23            | 220         | 7           | 81            | 20             | 24           |
| 71752        | Gtf3c2      | 202        | 435          | 816           | 5984        | 243         | 360           | 1039           | 4418         |
| 71753        | Tmprss6     | 16         | 6            | 41            | 59          | 16          | 4             | 40             | 65           |
| 71760        | Agxt2l1     | 4          | 2            | 24            | 73          | 5           | 5             | 28             | 75           |
| 71764        | Tmem24      | 43         | 54           | 520           | 439         | 34          | 43            | 416            | 322          |
| 71765        | Klhdc3      | 141        | 1390         | 254           | 124         | 137         | 1425          | 209            | 96           |
| 71770        | Ap2b1       | 183        | 214          | 70            | 506         | 247         | 211           | 89             | 682          |
| 71777        | Ing3        | 75         | 131          | 70            | 4500        | 77          | 112           | 64             | 3672         |
| 71778        | Klhl5       | 43         | 105          | 60            | 2209        | 38          | 65            | 46             | 1239         |
| 71780        | Isyna1      | 92         | 1261         | 128           | 1608        | 82          | 1119          | 105            | 1480         |
| 71781        | Slc16a14    | 6          | 3            | 24            | 26          | 6           | 3             | 28             | 29           |



| NCBI Gene ID | Gene Symbol | Affy. CD4+ | Agilent CD4+ | Illumina CD4+ | Nimbl. CD4+ | Affy. CD19+ | Agilent CD19+ | Illumina CD19+ | Nimbl. CD19+ |
|--------------|-------------|------------|--------------|---------------|-------------|-------------|---------------|----------------|--------------|
| 71785        | Pdghd       | 5          | 3            | 36            | 18          | 5           | 3             | 27             | 22           |
| 71790        | Anxa9       | 5          | 6            | 25            | 80          | 7           | 21            | 31             | 83           |
| 71791        | Cpa4        | 5          | 11           | 31            | 54          | 5           | 12            | 25             | 38           |
| 71795        | Pitpnc1     | 372        | 756          | 1794          | 21110       | 66          | 178           | 301            | 5921         |
| 71801        | Plekhf2     | 58         | 90           | 95            | 141         | 122         | 179           | 187            | 221          |
| 71803        | Slc25a18    | 18         | 8            | 17            | 36          | 17          | 10            | 30             | 28           |
| 71805        | Nup93       | 72         | 184          | 412           | 347         | 90          | 237           | 556            | 335          |
| 71819        | Kif23       | 24         | 132          | 829           | 718         | 24          | 66            | 363            | 185          |
| 71820        | Wdr34       | 17         | 25           | 31            | 31          | 22          | 26            | 32             | 52           |
| 71835        | Lancl2      | 20         | 4            | 81            | 650         | 36          | 7             | 185            | 1456         |
| 71837        | 700003e16r  | 5          | 11           | 28            | 68          | 5           | 11            | 26             | 76           |
| 71838        | Phf7        | 26         | 87           | 177           | 1661        | 34          | 117           | 207            | 2024         |
| 71841        | 700008i05r  | 4          | 2            | 27            | 20          | 4           | 3             | 26             | 22           |
| 71844        | Nupl1       | 99         | 69           | 133           | 817         | 96          | 72            | 165            | 751          |
| 71854        | Dpep3       | 8          | 4            | 29            | 26          | 9           | 3             | 24             | 28           |
| 71861        | Zswim2      | 5          | 2            | 25            | 17          | 6           | 3             | 29             | 27           |
| 71865        | Fbxo30      | 16         | 15           | 43            | 995         | 26          | 23            | 65             | 1072         |
| 71869        | Serpinb12   | 4          | 3            | 31            | 16          | 4           | 6             | 32             | 22           |
| 71872        | Aox4        | 6          | 3            | 24            | 27          | 6           | 3             | 24             | 37           |
| 71876        | Mlf1ip      | 10         | 5            | 64            | 1534        | 11          | 10            | 69             | 2661         |
| 71878        | 310007d09r  | 7          | 2            | 21            | 54          | 6           | 4             | 26             | 49           |
| 71884        | Chit1       | 5          | 16           | 21            | 35          | 5           | 12            | 25             | 28           |
| 71885        | 310003h01r  | 60         | 119          | 409           | 800         | 62          | 102           | 356            | 798          |
| 71889        | Epn3        | 12         | 452          | 63            | 57          | 12          | 528           | 56             | 52           |
| 71890        | Mad2l2      | 23         | 672          | 128           | 1168        | 29          | 799           | 123            | 1323         |
| 71891        | Cdadcl1     | 48         | 74           | 94            | 1052        | 50          | 51            | 73             | 1005         |
| 71893        | Noxo1       | 10         | 52           | 48            | 183         | 10          | 89            | 64             | 262          |
| 71903        | 310038e17r  | 5          | 6            | 28            | 25          | 4           | 11            | 38             | 53           |
| 71907        | Serpina9    | 5          | 12           | 17            | 75          | 5           | 11            | 20             | 66           |
| 71908        | Cldn23      | 6          | 4            | 54            | 52          | 6           | 4             | 50             | 55           |
| 71910        | Ppapdc1     | 110        | 45           | 73            | 1345        | 64          | 36            | 54             | 1036         |
| 71914        | Antxr2      | 88         | 336          | 239           | 444         | 56          | 238           | 205            | 241          |
| 71920        | Epgn        | 6          | 18           | 28            | 29          | 7           | 10            | 28             | 25           |
| 71924        | Tube1       | 8          | 35           | 61            | 94          | 10          | 78            | 69             | 95           |
| 71932        | Abhd9       | 8          | 15           | 17            | 42          | 8           | 11            | 20             | 49           |
| 71934        | Car13       | 6          | 2            | 29            | 23          | 6           | 22            | 49             | 260          |
| 71947        | 310067b10r  | 112        | 166          | 72            | 1533        | 118         | 210           | 88             | 1106         |
| 71949        | Lass5       | 149        | 410          | 774           | 5204        | 134         | 349           | 640            | 3276         |
| 71951        | Gpc2        | 11         | 25           | 57            | 174         | 11          | 22            | 58             | 213          |
| 71960        | Myh14       | 15         | 39           | 34            | 29          | 13          | 27            | 29             | 41           |
| 71963        | Cdca4       | 164        | 239          | 1441          | 6265        | 142         | 186           | 1103           | 4881         |
| 71966        | Nkiras2     | 26         | 208          | 160           | 356         | 29          | 321           | 202            | 672          |
| 71970        | 10018m08r   | 11         | 8            | 21            | 16          | 8           | 15            | 17             | 21           |
| 71971        | Zswim1      | 12         | 26           | 337           | 89          | 12          | 23            | 374            | 65           |
| 71972        | Dnmbp       | 32         | 77           | 29            | 38          | 27          | 74            | 33             | 32           |
| 71973        | Rbpms2      | 6          | 51           | 28            | 145         | 7           | 27            | 24             | 71           |
| 71978        | Ppp2r2a     | 123        | 1079         | 46            | 3153        | 96          | 670           | 39             | 1979         |
| 71982        | Snx10       | 7          | 30           | 129           | 176         | 8           | 48            | 200            | 425          |
| 71984        | Sars2       | 25         | 208          | 71            | 455         | 28          | 179           | 59             | 458          |
| 71986        | Ddx28       | 12         | 119          | 90            | 208         | 13          | 138           | 96             | 274          |
| 71990        | Ddx54       | 140        | 2887         | 1824          | 370         | 207         | 5329          | 2749           | 525          |

| NCBI Gene ID | Gene Symbol | Affy. CD4+ | Agilent CD4+ | Illumina CD4+ | Nimbl. CD4+ | Affy. CD19+ | Agilent CD19+ | Illumina CD19+ | Nimbl. CD19+ |
|--------------|-------------|------------|--------------|---------------|-------------|-------------|---------------|----------------|--------------|
| 71994        | Cnn3        | 68         | 589          | 605           | 4373        | 235         | 2541          | 2316           | 12736        |
| 71999        | Fbxo22      | 76         | 257          | 19            | 1121        | 113         | 308           | 18             | 1095         |
| 72002        | Slc39a5     | 12         | 9            | 37            | 95          | 12          | 8             | 30             | 30           |
| 72003        | Synpr       | 6          | 2            | 22            | 19          | 6           | 3             | 25             | 32           |
| 72008        | Zfyve19     | 23         | 360          | 62            | 89          | 22          | 496           | 67             | 135          |
| 72022        | Slc35f2     | 35         | 31           | 24            | 504         | 12          | 16            | 26             | 405          |
| 72023        | Cyb561d1    | 83         | 715          | 855           | 409         | 87          | 759           | 878            | 460          |
| 72027        | Slc39a4     | 10         | 146          | 89            | 125         | 9           | 80            | 54             | 82           |
| 72039        | Mccc1       | 43         | 352          | 71            | 1200        | 47          | 468           | 70             | 1184         |
| 72042        | Cotl1       | 278        | 41950        | 1812          | 637         | 214         | 29261         | 1191           | 454          |
| 72043        | Sulf2       | 8          | 3            | 54            | 24          | 8           | 3             | 48             | 23           |
| 72046        | 010005j08r  | 42         | 222          | 180           | 640         | 28          | 153           | 139            | 443          |
| 72047        | Ddx42       | 113        | 747          | 26            | 5725        | 105         | 609           | 22             | 6481         |
| 72049        | Tnfrsf13c   | 28         | 4            | 24            | 45          | 241         | 4371          | 3228           | 3919         |
| 72050        | Kdelc1      | 6          | 21           | 90            | 240         | 6           | 28            | 104            | 266          |
| 72054        | Cyp4f18     | 7          | 19           | 36            | 31          | 131         | 2322          | 3588           | 5537         |
| 72056        | 310055g02r  | 18         | 16           | 95            | 28          | 19          | 6             | 65             | 37           |
| 72057        | Phf10       | 58         | 1677         | 1029          | 2472        | 48          | 1305          | 883            | 1511         |
| 72061        | 010111i01r  | 24         | 59           | 24            | 125         | 24          | 40            | 27             | 62           |
| 72065        | Rap2c       | 73         | 398          | 1202          | 3264        | 72          | 300           | 1212           | 3013         |
| 72068        | Cnot2       | 133        | 1106         | 750           | 6861        | 167         | 1295          | 967            | 5673         |
| 72075        | Ogfr        | 130        | 1873         | 681           | 240         | 126         | 2968          | 715            | 288          |
| 72077        | Gcnt3       | 8          | 2            | 32            | 29          | 9           | 3             | 28             | 30           |
| 72080        | 110317e24r  | 13         | 39           | 51            | 81          | 14          | 69            | 55             | 223          |
| 72082        | Cyp2c55     | 4          | 33           | 21            | 22          | 4           | 20            | 22             | 20           |
| 72085        | Osgepl1     | 11         | 111          | 113           | 1791        | 14          | 198           | 167            | 2776         |
| 72088        | Ush1c       | 12         | 24           | 31            | 70          | 14          | 21            | 32             | 50           |
| 72090        | Entpd8      | 6          | 4            | 20            | 41          | 7           | 4             | 22             | 37           |
| 72096        | 110208k18r  | 33         | 254          | 26            | 402         | 31          | 250           | 27             | 450          |
| 72102        | Dusp11      | 201        | 3413         | 2375          | 3543        | 168         | 2752          | 1952           | 2483         |
| 72107        | 500005o03r  | 7          | 32           | 37            | 626         | 8           | 69            | 55             | 1216         |
| 72108        | Ddhd2       | 31         | 417          | 278           | 81          | 23          | 385           | 209            | 49           |
| 72112        | Ppp1r14d    | 7          | 6            | 27            | 43          | 8           | 6             | 26             | 43           |
| 72113        | Adck1       | 33         | 162          | 95            | 1020        | 26          | 138           | 94             | 1027         |
| 72114        | Zbed3       | 10         | 3            | 24            | 72          | 21          | 5             | 24             | 52           |
| 72119        | Tpx2        | 7          | 9            | 42            | 171         | 11          | 40            | 69             | 373          |
| 72123        | 110109k11r  | 34         | 168          | 26            | 3781        | 43          | 216           | 30             | 4799         |
| 72124        | Seh1l       | 65         | 246          | 47            | 2351        | 67          | 234           | 44             | 2025         |
| 72129        | Pex13       | 30         | 366          | 85            | 2168        | 43          | 479           | 98             | 2190         |
| 72135        | Pygo1       | 8          | 2            | 20            | 52          | 8           | 3             | 28             | 67           |
| 72141        | Adpgk       | 78         | 384          | 356           | 187         | 73          | 284           | 290            | 200          |
| 72144        | Slc37a3     | 128        | 211          | 31            | 376         | 71          | 104           | 27             | 185          |
| 72145        | Wdfy3       | 10         | 25           | 25            | 56          | 10          | 19            | 24             | 91           |
| 72149        | 510019a05r  | 53         | 735          | 62            | 297         | 103         | 1609          | 85             | 517          |
| 72151        | Rfc5        | 98         | 277          | 141           | 800         | 95          | 357           | 189            | 878          |
| 72157        | Pgm2        | 58         | 841          | 945           | 2286        | 46          | 555           | 670            | 1583         |
| 72162        | Dhx36       | 170        | 458          | 649           | 335         | 138         | 372           | 587            | 221          |
| 72167        | Thumpd2     | 44         | 218          | 215           | 1086        | 32          | 149           | 137            | 694          |
| 72169        | Trim29      | 7          | 6            | 44            | 50          | 9           | 4             | 35             | 50           |
| 72170        | Chchd4      | 17         | 111          | 215           | 2561        | 21          | 157           | 279            | 3017         |
| 72179        | Fbxl2       | 8          | 3            | 48            | 26          | 8           | 3             | 41             | 36           |

| NCBI Gene ID | Gene Symbol | Affy. CD4+ | Agilent CD4+ | Illumina CD4+ | Nimbl. CD4+ | Affy. CD19+ | Agilent CD19+ | Illumina CD19+ | Nimbl. CD19+ |
|--------------|-------------|------------|--------------|---------------|-------------|-------------|---------------|----------------|--------------|
| 72183        | Snx6        | 107        | 262          | 30            | 5356        | 109         | 206           | 34             | 4814         |
| 72193        | Sfrs2ip     | 232        | 766          | 679           | 2295        | 335         | 858           | 973            | 2901         |
| 72194        | Fbxl20      | 156        | 103          | 196           | 126         | 147         | 83            | 181            | 187          |
| 72199        | Mms19l      | 146        | 759          | 64            | 3278        | 115         | 577           | 49             | 2684         |
| 72215        | 700001p01r  | 7          | 13           | 38            | 109         | 5           | 6             | 34             | 130          |
| 72219        | 700013b16r  | 9          | 175          | 25            | 38          | 7           | 145           | 26             | 41           |
| 72236        | Tsnaxip1    | 7          | 2            | 28            | 66          | 8           | 4             | 31             | 338          |
| 72238        | Tbc1d5      | 69         | 220          | 215           | 689         | 117         | 433           | 395            | 1411         |
| 72244        | 500014c10r  | 60         | 694          | 179           | 1091        | 42          | 328           | 123            | 670          |
| 72265        | Tram1       | 672        | 769          | 1137          | 8632        | 655         | 701           | 1124           | 7444         |
| 72269        | Cda         | 10         | 9            | 26            | 37          | 9           | 12            | 25             | 34           |
| 72273        | 210404o07r  | 20         | 19           | 48            | 59          | 22          | 38            | 84             | 68           |
| 72282        | 310062g17r  | 7          | 2            | 47            | 437         | 7           | 3             | 34             | 265          |
| 72284        | Oraov1      | 29         | 256          | 29            | 3054        | 28          | 284           | 26             | 2646         |
| 72287        | Plekhf1     | 4          | 11           | 22            | 30          | 5           | 11            | 27             | 24           |
| 72290        | Lsm11       | 24         | 85           | 32            | 190         | 21          | 57            | 28             | 132          |
| 72293        | Nkd2        | 16         | 7            | 30            | 72          | 12          | 3             | 30             | 100          |
| 72296        | Rusc1       | 41         | 849          | 285           | 486         | 35          | 685           | 190            | 427          |
| 72297        | B3gnt3      | 16         | 5            | 53            | 109         | 12          | 3             | 42             | 83           |
| 72303        | Cyp2c65     | 4          | 22           | 30            | 44          | 4           | 22            | 22             | 48           |
| 72307        | 510002d24r  | 73         | 451          | 115           | 2798        | 65          | 333           | 98             | 2762         |
| 72308        | Brf1        | 113        | 581          | 781           | 926         | 79          | 408           | 527            | 639          |
| 72310        | Nkg7        | 9          | 59           | 78            | 278         | 7           | 10            | 27             | 71           |
| 72318        | Pscd4       | 200        | 662          | 2864          | 4077        | 199         | 618           | 2871           | 3667         |
| 72320        | 510003e04r  | 90         | 314          | 150           | 1087        | 88          | 272           | 124            | 928          |
| 72322        | Xpo5        | 84         | 117          | 325           | 281         | 78          | 122           | 332            | 315          |
| 72323        | Asb6        | 76         | 887          | 135           | 520         | 72          | 663           | 93             | 531          |
| 72324        | Plxdc1      | 9          | 14           | 40            | 166         | 8           | 14            | 36             | 195          |
| 72330        | Kbtbd5      | 7          | 13           | 19            | 34          | 6           | 14            | 24             | 48           |
| 72345        | 310002o09r  | 49         | 140          | 56            | 646         | 29          | 69            | 36             | 391          |
| 72349        | Dusp3       | 10         | 2            | 26            | 21          | 21          | 10            | 27             | 29           |
| 72354        | Ttc4        | 52         | 849          | 279           | 1674        | 55          | 793           | 285            | 1446         |
| 72373        | Psca        | 6          | 16           | 60            | 52          | 6           | 14            | 60             | 36           |
| 72383        | Cnfn        | 20         | 37           | 24            | 46          | 18          | 29            | 26             | 52           |
| 72388        | Ripk4       | 5          | 3            | 23            | 18          | 5           | 3             | 25             | 16           |
| 72391        | Cdkn3       | 7          | 17           | 56            | 282         | 8           | 35            | 115            | 231          |
| 72393        | Faim2       | 8          | 102          | 18            | 75          | 8           | 100           | 26             | 79           |
| 72399        | Brap        | 129        | 94           | 727           | 376         | 98          | 108           | 596            | 209          |
| 72401        | Slc43a1     | 14         | 4            | 28            | 45          | 39          | 64            | 51             | 332          |
| 72404        | Wdr44       | 49         | 217          | 105           | 140         | 56          | 188           | 109            | 125          |
| 72413        | Kcnmb2      | 6          | 20           | 24            | 17          | 6           | 16            | 22             | 32           |
| 72415        | Sgol1       | 10         | 27           | 75            | 59          | 9           | 66            | 58             | 76           |
| 72416        | Lrpprc      | 140        | 844          | 44            | 1961        | 151         | 855           | 44             | 2121         |
| 72432        | Spink5      | 5          | 2            | 28            | 17          | 5           | 3             | 24             | 31           |
| 72433        | Rab38       | 8          | 3            | 25            | 17          | 9           | 4             | 27             | 21           |
| 72446        | 500010e01r  | 6          | 31           | 24            | 49          | 5           | 20            | 26             | 47           |
| 72459        | Htatsf1     | 57         | 418          | 1131          | 1011        | 55          | 294           | 1023           | 798          |
| 72465        | Zfp131      | 32         | 915          | 1044          | 2508        | 35          | 1046          | 1055           | 3071         |
| 72469        | Plcd3       | 15         | 13           | 39            | 40          | 13          | 34            | 41             | 76           |
| 72472        | Slc16a10    | 24         | 37           | 51            | 132         | 18          | 25            | 48             | 57           |
| 72475        | Ssbp3       | 160        | 809          | 899           | 1926        | 70          | 210           | 230            | 540          |

| NCBI Gene ID | Gene Symbol | Affy. CD4+ | Agilent CD4+ | Illumina CD4+ | Nimbl. CD4+ | Affy. CD19+ | Agilent CD19+ | Illumina CD19+ | Nimbl. CD19+ |
|--------------|-------------|------------|--------------|---------------|-------------|-------------|---------------|----------------|--------------|
| 72482        | Acbd6       | 39         | 463          | 185           | 5290        | 28          | 399           | 116            | 5567         |
| 72486        | 510206b13r  | 36         | 55           | 20            | 565         | 33          | 46            | 23             | 395          |
| 72500        | Ier5l       | 18         | 11           | 28            | 31          | 22          | 24            | 35             | 30           |
| 72502        | Cwf19l1     | 37         | 97           | 424           | 1152        | 52          | 165           | 668            | 1638         |
| 72503        | 510507b11r  | 213        | 3026         | 32            | 3548        | 239         | 2733          | 34             | 3404         |
| 72508        | Rps6kb1     | 144        | 227          | 51            | 9798        | 159         | 175           | 48             | 9518         |
| 72522        | Atxn7l2     | 42         | 400          | 148           | 44          | 44          | 442           | 157            | 46           |
| 72535        | Aldh1b1     | 12         | 39           | 33            | 493         | 10          | 58            | 32             | 656          |
| 72554        | Utp14a      | 53         | 39           | 117           | 3265        | 57          | 27            | 122            | 2789         |
| 72560        | Naalad2     | 4          | 2            | 27            | 39          | 4           | 3             | 27             | 21           |
| 72565        | Uaca        | 7          | 2            | 22            | 26          | 8           | 3             | 26             | 35           |
| 72567        | Bclaf1      | 234        | 1370         | 75            | 5099        | 205         | 1274          | 75             | 3658         |
| 72569        | Bbs5        | 4          | 3            | 41            | 37          | 5           | 8             | 45             | 43           |
| 72572        | Spats2      | 5          | 8            | 26            | 458         | 6           | 7             | 25             | 53           |
| 72584        | Cul4b       | 95         | 461          | 266           | 2835        | 100         | 444           | 264            | 2379         |
| 72605        | Car10       | 8          | 7            | 19            | 37          | 8           | 5             | 23             | 39           |
| 72607        | Usp13       | 5          | 5            | 21            | 27          | 5           | 6             | 23             | 27           |
| 72630        | Hspa12b     | 8          | 14           | 29            | 70          | 8           | 14            | 24             | 51           |
| 72634        | Tdrkh       | 9          | 53           | 99            | 106         | 6           | 9             | 44             | 35           |
| 72650        | 310006k23r  | 14         | 38           | 29            | 65          | 14          | 41            | 33             | 54           |
| 72655        | 310026p18r  | 105        | 1351         | 377           | 18918       | 98          | 1085          | 322            | 15754        |
| 72657        | 700094k13r  | 44         | 697          | 983           | 5450        | 45          | 1033          | 1432           | 6525         |
| 72661        | 310032e02r  | 18         | 39           | 52            | 124         | 18          | 109           | 80             | 450          |
| 72668        | 310030e01r  | 5          | 3            | 31            | 43          | 5           | 6             | 32             | 45           |
| 72674        | Adipor1     | 121        | 407          | 712           | 4972        | 140         | 488           | 823            | 3999         |
| 72685        | Dnajc6      | 15         | 28           | 136           | 182         | 9           | 4             | 23             | 49           |
| 72693        | Zcchc12     | 8          | 36           | 51            | 98          | 6           | 3             | 33             | 30           |
| 72709        | C1qtnf6     | 6          | 20           | 30            | 19          | 7           | 11            | 28             | 19           |
| 72713        | Angptl1     | 13         | 2            | 18            | 101         | 74          | 5             | 27             | 352          |
| 72720        | Zfp248      | 7          | 19           | 48            | 24          | 7           | 8             | 30             | 26           |
| 72722        | 810405j04r  | 95         | 343          | 684           | 5958        | 126         | 414           | 869            | 5901         |
| 72726        | Tbcc        | 29         | 1226         | 1000          | 1119        | 30          | 1535          | 1055           | 1277         |
| 72727        | B3gat3      | 78         | 139          | 155           | 896         | 100         | 224           | 186            | 1346         |
| 72736        | Txndc1      | 117        | 218          | 63            | 366         | 116         | 155           | 61             | 277          |
| 72748        | Hdhd3       | 6          | 13           | 28            | 72          | 6           | 19            | 32             | 67           |
| 72750        | Als2cr13    | 136        | 916          | 361           | 598         | 106         | 723           | 357            | 307          |
| 72774        | Neil1       | 20         | 236          | 42            | 115         | 30          | 486           | 52             | 202          |
| 72780        | Rspo3       | 5          | 2            | 34            | 23          | 5           | 3             | 32             | 23           |
| 72795        | Ttc19       | 65         | 64           | 127           | 1686        | 56          | 60            | 158            | 1131         |
| 72828        | 810457i06r  | 58         | 628          | 32            | 3567        | 24          | 175           | 30             | 1511         |
| 72831        | Dhx30       | 79         | 4733         | 1710          | 2832        | 82          | 4715          | 1613           | 3102         |
| 72832        | Crtac1      | 9          | 10           | 27            | 174         | 8           | 11            | 28             | 192          |
| 72852        | 300024o10r  | 42         | 167          | 123           | 95          | 38          | 93            | 95             | 105          |
| 72881        | Zdhhc4      | 103        | 81           | 727           | 1134        | 109         | 83            | 821            | 965          |
| 72898        | Asphd2      | 10         | 45           | 37            | 33          | 9           | 45            | 34             | 38           |
| 72900        | Ndufv2      | 131        | 336          | 519           | 5289        | 130         | 306           | 521            | 4120         |
| 72902        | Spock3      | 5          | 2            | 23            | 30          | 5           | 3             | 18             | 31           |
| 72935        | Ddx41       | 87         | 302          | 1009          | 558         | 172         | 558           | 1769           | 1066         |
| 72949        | Ccnt2       | 174        | 772          | 954           | 6752        | 206         | 691           | 1141           | 5902         |
| 72960        | Top1mt      | 31         | 215          | 99            | 783         | 22          | 206           | 84             | 343          |
| 72961        | Slc17a7     | 7          | 2            | 21            | 44          | 8           | 5             | 26             | 81           |

| NCBI<br>Gene ID | Gene<br>Symbol | Affy.<br>CD4+ | Agilent<br>CD4+ | Illumina<br>CD4+ | Nimbl.<br>CD4+ | Affy.<br>CD19+ | Agilent<br>CD19+ | Illumina<br>CD19+ | Nimbl.<br>CD19+ |
|-----------------|----------------|---------------|-----------------|------------------|----------------|----------------|------------------|-------------------|-----------------|
| 72962           | Ecgf1          | 25            | 201             | 42               | 2260           | 25             | 161              | 37                | 1999            |
| 72972           | Gcap14         | 152           | 317             | 32               | 464            | 128            | 246              | 30                | 293             |
| 72981           | Prkrir         | 130           | 403             | 579              | 3093           | 102            | 341              | 363               | 2375            |
| 72999           | Insig2         | 62            | 145             | 209              | 1351           | 79             | 243              | 190               | 1222            |
| 73010           | Gpr22          | 7             | 2               | 18               | 19             | 6              | 3                | 20                | 16              |
| 73016           | Kremen2        | 16            | 19              | 69               | 68             | 14             | 4                | 28                | 43              |
| 73062           | Ppp1r16a       | 31            | 64              | 49               | 46             | 32             | 106              | 56                | 65              |
| 73068           | Fut11          | 49            | 60              | 33               | 255            | 55             | 59               | 32                | 185             |
| 73078           | Pmpcb          | 49            | 516             | 178              | 2618           | 58             | 582              | 190               | 2532            |
| 73086           | Rps6ka5        | 34            | 20              | 74               | 144            | 91             | 44               | 200               | 399             |
| 73112           | l10003a17r     | 157           | 1489            | 33               | 15424          | 108            | 1026             | 28                | 10650           |
| 73122           | Tgfbra1        | 66            | 33              | 44               | 147            | 58             | 20               | 46                | 119             |
| 73132           | Slc25a16       | 19            | 24              | 21               | 104            | 20             | 21               | 26                | 93              |
| 73149           | Clec4a3        | 5             | 2               | 35               | 27             | 5              | 7                | 42                | 76              |
| 73160           | 110018i06r     | 5             | 2               | 30               | 18             | 5              | 3                | 27                | 22              |
| 73167           | 110043j09r     | 7             | 34              | 31               | 114            | 7              | 38               | 34                | 90              |
| 73170           | Rwdd3          | 9             | 67              | 41               | 657            | 11             | 50               | 37                | 588             |
| 73173           | Pcdh18         | 7             | 5               | 22               | 18             | 8              | 4                | 17                | 15              |
| 73178           | Wasl           | 103           | 74              | 408              | 243            | 78             | 42               | 302               | 117             |
| 73181           | Nfatc4         | 11            | 145             | 24               | 27             | 11             | 79               | 25                | 30              |
| 73182           | l10045g13r     | 25            | 111             | 41               | 359            | 39             | 138              | 49                | 642             |
| 73192           | Xpot           | 75            | 268             | 377              | 753            | 87             | 207              | 420               | 560             |
| 73212           | 110082i17r     | 26            | 3               | 50               | 349            | 29             | 8                | 63                | 463             |
| 73218           | l10056o03r     | 67            | 741             | 452              | 346            | 76             | 868              | 408               | 442             |
| 73229           | Zfp51          | 31            | 488             | 23               | 2017           | 25             | 251              | 22                | 1230            |
| 73230           | Bmper          | 7             | 3               | 23               | 50             | 7              | 3                | 23                | 77              |
| 73246           | Rassf6         | 4             | 2               | 24               | 20             | 6              | 17               | 41                | 50              |
| 73247           | s00027n09r     | 28            | 225             | 30               | 210            | 27             | 259              | 29                | 275             |
| 73250           | Psg30          | 4             | 2               | 27               | 27             | 5              | 2                | 33                | 21              |
| 73261           | 700037c18r     | 14            | 96              | 25               | 121            | 16             | 222              | 26                | 634             |
| 73266           | Speer6-ps1     | 4             | 2               | 18               | 20             | 4              | 3                | 22                | 53              |
| 73284           | Ddit4l         | 7             | 3               | 46               | 44             | 8              | 8                | 45                | 36              |
| 73296           | Rhobtb3        | 6             | 4               | 25               | 64             | 7              | 3                | 30                | 105             |
| 73297           | 700034i23r     | 10            | 2               | 51               | 25             | 8              | 3                | 51                | 42              |
| 73302           | '00031m16i     | 6             | 2               | 21               | 24             | 6              | 3                | 21                | 28              |
| 73316           | Calr3          | 6             | 11              | 34               | 79             | 5              | 17               | 34                | 67              |
| 73332           | 700041c02r     | 5             | 104             | 34               | 682            | 5              | 93               | 31                | 32              |
| 73336           | 700036d21r     | 6             | 2               | 37               | 31             | 6              | 3                | 40                | 29              |
| 73338           | 700041b20r     | 72            | 687             | 533              | 50             | 62             | 529              | 465               | 40              |
| 73341           | Arhgef6        | 128           | 351             | 1442             | 732            | 140            | 356              | 1575              | 665             |
| 73344           | 700034j05r     | 6             | 3               | 31               | 13             | 6              | 4                | 28                | 13              |
| 73360           | Actrt1         | 6             | 3               | 18               | 33             | 6              | 3                | 22                | 39              |
| 73379           | Dcbld2         | 5             | 10              | 31               | 31             | 5              | 5                | 29                | 69              |
| 73389           | Hbp1           | 190           | 1189            | 1385             | 10203          | 172            | 777              | 1186              | 8401            |
| 73407           | '00055m20i     | 14            | 42              | 23               | 30             | 14             | 56               | 24                | 20              |
| 73412           | Txndc3         | 4             | 2               | 19               | 19             | 4              | 3                | 19                | 26              |
| 73419           | 700052n19r     | 41            | 28              | 327              | 526            | 52             | 41               | 535               | 620             |
| 73430           | 700049g17r     | 8             | 3               | 22               | 282            | 9              | 3                | 21                | 339             |
| 73431           | 700052k11r     | 53            | 171             | 63               | 163            | 44             | 212              | 54                | 169             |
| 73442           | Hspa12a        | 10            | 18              | 53               | 33             | 10             | 19               | 76                | 34              |
| 73447           | Wdr13          | 51            | 319             | 27               | 439            | 45             | 150              | 22                | 247             |

| NCBI Gene ID | Gene Symbol | Affy. CD4+ | Agilent CD4+ | Illumina CD4+ | Nimbl. CD4+ | Affy. CD19+ | Agilent CD19+ | Illumina CD19+ | Nimbl. CD19+ |
|--------------|-------------|------------|--------------|---------------|-------------|-------------|---------------|----------------|--------------|
| 73451        | 700065o13r  | 12         | 158          | 136           | 309         | 11          | 105           | 113            | 190          |
| 73458        | 700055n04r  | 165        | 17           | 23            | 37          | 125         | 16            | 26             | 46           |
| 73469        | Rnf38       | 275        | 24           | 1979          | 2356        | 165         | 18            | 1164           | 929          |
| 73470        | Kif2b       | 6          | 3            | 28            | 23          | 7           | 3             | 29             | 25           |
| 73503        | Mbd3l1      | 5          | 4            | 32            | 26          | 6           | 6             | 31             | 36           |
| 73523        | 700081d17r  | 5          | 2            | 22            | 33          | 5           | 3             | 26             | 37           |
| 73526        | Speer4b     | 4          | 3            | 29            | 28          | 4           | 3             | 32             | 28           |
| 73608        | Marveld3    | 6          | 14           | 31            | 75          | 6           | 12            | 29             | 74           |
| 73647        | Capn9       | 5          | 2            | 37            | 76          | 5           | 3             | 37             | 71           |
| 73649        | Cybrd1      | 10         | 13           | 36            | 48          | 9           | 12            | 36             | 37           |
| 73656        | Ms4a6c      | 189        | 89           | 90            | 5464        | 64          | 51            | 64             | 4153         |
| 73660        | Cabp4       | 13         | 3            | 39            | 26          | 11          | 12            | 38             | 40           |
| 73666        | Thoc3       | 89         | 120          | 308           | 2104        | 86          | 136           | 247            | 1693         |
| 73679        | Tex19       | 8          | 2            | 66            | 42          | 9           | 3             | 66             | 64           |
| 73680        | 700081m15r  | 17         | 82           | 33            | 165         | 19          | 53            | 30             | 118          |
| 73690        | Glipr1      | 108        | 560          | 1239          | 4988        | 52          | 206           | 465            | 1939         |
| 73692        | 700089e03r  | 50         | 271          | 71            | 348         | 35          | 144           | 50             | 135          |
| 73693        | Dppa4       | 8          | 2            | 29            | 46          | 7           | 2             | 26             | 52           |
| 73699        | Ppp2r1b     | 146        | 365          | 1088          | 898         | 87          | 183           | 702            | 236          |
| 73703        | Dppa2       | 4          | 157          | 28            | 25          | 5           | 262           | 25             | 21           |
| 73708        | Dppa3       | 8          | 3            | 29            | 30          | 7           | 3             | 28             | 37           |
| 73720        | Cst6        | 5          | 17           | 30            | 68          | 5           | 15            | 29             | 83           |
| 73721        | l10017d15r  | 15         | 22           | 19            | 131         | 14          | 18            | 25             | 150          |
| 73723        | Sh3bgrl3    | 584        | 9783         | 5205          | 17390       | 833         | 14976         | 6622           | 22203        |
| 73724        | Mcee        | 42         | 61           | 513           | 747         | 39          | 55            | 454            | 778          |
| 73737        | l10008p14r  | 13         | 400          | 417           | 183         | 14          | 596           | 494            | 287          |
| 73744        | Man2c1      | 72         | 1503         | 926           | 509         | 47          | 855           | 519            | 279          |
| 73747        | l10034g24r  | 29         | 428          | 104           | 878         | 20          | 240           | 66             | 423          |
| 73750        | Whrn        | 32         | 233          | 175           | 208         | 63          | 936           | 578            | 734          |
| 73754        | Thap1       | 30         | 47           | 64            | 3466        | 29          | 52            | 52             | 2252         |
| 73788        | 333408a19r  | 11         | 14           | 32            | 497         | 10          | 19            | 52             | 945          |
| 73804        | Kif2c       | 7          | 3            | 30            | 357         | 8           | 3             | 44             | 1025         |
| 73826        | Poldip3     | 300        | 927          | 1754          | 3306        | 298         | 780           | 1809           | 2420         |
| 73828        | Wdr21       | 48         | 172          | 176           | 163         | 55          | 176           | 183            | 163          |
| 73834        | Atp6v1d     | 289        | 3619         | 1414          | 4436        | 142         | 1806          | 640            | 2397         |
| 73835        | Ifitm5      | 15         | 13           | 27            | 70          | 16          | 8             | 26             | 88           |
| 73847        | 30432m24r   | 26         | 83           | 68            | 81          | 26          | 61            | 65             | 56           |
| 73866        | 30432h15r   | 4          | 3            | 28            | 25          | 4           | 3             | 28             | 33           |
| 73873        | 30430e16r   | 6          | 17           | 28            | 94          | 6           | 36            | 27             | 125          |
| 73902        | 830406j20r  | 9          | 10           | 33            | 60          | 9           | 10            | 30             | 63           |
| 73910        | Arhgap18    | 26         | 37           | 89            | 120         | 25          | 33            | 86             | 109          |
| 73914        | Irak3       | 31         | 27           | 100           | 300         | 153         | 178           | 635            | 1894         |
| 73940        | Hapln2      | 17         | 6            | 29            | 25          | 15          | 3             | 33             | 34           |
| 73991        | Spg3a       | 8          | 72           | 17            | 115         | 9           | 96            | 28             | 208          |
| 73998        | Herc3       | 200        | 760          | 180           | 662         | 94          | 293           | 103            | 264          |
| 74002        | Psd2        | 8          | 20           | 39            | 130         | 8           | 15            | 25             | 76           |
| 74006        | Dnm1l       | 163        | 285          | 109           | 2372        | 179         | 268           | 117            | 2886         |
| 74007        | Btbd11      | 64         | 97           | 44            | 1231        | 8           | 2             | 24             | 65           |
| 74011        | Slc25a27    | 34         | 175          | 278           | 347         | 14          | 64            | 91             | 113          |
| 74012        | Rap2b       | 78         | 176          | 97            | 586         | 29          | 77            | 48             | 148          |
| 74015        | Fcho1       | 119        | 1237         | 1099          | 144         | 158         | 1515          | 1442           | 132          |

| NCBI Gene ID | Gene Symbol | Affy. CD4+ | Agilent CD4+ | Illumina CD4+ | Nimbl. CD4+ | Affy. CD19+ | Agilent CD19+ | Illumina CD19+ | Nimbl. CD19+ |
|--------------|-------------|------------|--------------|---------------|-------------|-------------|---------------|----------------|--------------|
| 74016        | Phf19       | 20         | 50           | 44            | 48          | 26          | 135           | 76             | 95           |
| 74018        | Als2        | 29         | 33           | 209           | 343         | 32          | 42            | 318            | 533          |
| 74019        | Traf3ip1    | 16         | 63           | 27            | 145         | 17          | 85            | 24             | 119          |
| 74020        | Cpne4       | 8          | 12           | 32            | 30          | 8           | 10            | 35             | 48           |
| 74022        | 330401k13r  | 199        | 569          | 20            | 1044        | 244         | 636           | 21             | 1017         |
| 74025        | Nphp3       | 15         | 17           | 35            | 46          | 15          | 32            | 38             | 54           |
| 74026        | l21402d02r  | 234        | 2125         | 1104          | 1495        | 191         | 1722          | 763            | 1089         |
| 74030        | Rin2        | 9          | 11           | 33            | 56          | 8           | 4             | 31             | 20           |
| 74035        | Nol9        | 183        | 230          | 62            | 755         | 206         | 200           | 62             | 573          |
| 74042        | 321501e09r  | 6          | 2            | 36            | 19          | 7           | 3             | 35             | 23           |
| 74048        | 332428n05r  | 291        | 996          | 665           | 5607        | 24          | 70            | 57             | 344          |
| 74053        | Grip1       | 7          | 2            | 32            | 29          | 7           | 6             | 35             | 45           |
| 74055        | Plce1       | 5          | 5            | 29            | 198         | 5           | 3             | 30             | 70           |
| 74068        | Asz1        | 4          | 2            | 15            | 26          | 4           | 3             | 21             | 31           |
| 74069        | Serpina3a   | 5          | 4            | 21            | 33          | 5           | 4             | 22             | 37           |
| 74087        | Slc7a13     | 5          | 3            | 28            | 32          | 5           | 4             | 32             | 40           |
| 74091        | Npl         | 6          | 2            | 14            | 39          | 5           | 3             | 17             | 92           |
| 74097        | Pop7        | 27         | 590          | 176           | 940         | 33          | 970           | 212            | 1398         |
| 74100        | Arpp21      | 5          | 9            | 27            | 88          | 5           | 3             | 24             | 24           |
| 74102        | Slc35a5     | 48         | 153          | 76            | 3741        | 38          | 90            | 57             | 3202         |
| 74103        | Nebi        | 8          | 4            | 34            | 135         | 8           | 20            | 31             | 222          |
| 74104        | Abcb6       | 12         | 42           | 45            | 59          | 13          | 71            | 61             | 68           |
| 74105        | Gga2        | 18         | 71           | 210           | 2554        | 228         | 1693          | 3627           | 25193        |
| 74108        | Parn        | 42         | 261          | 117           | 170         | 48          | 303           | 129            | 210          |
| 74111        | Rbm19       | 48         | 534          | 221           | 239         | 46          | 520           | 220            | 261          |
| 74112        | Usp16       | 80         | 881          | 300           | 764         | 100         | 852           | 302            | 751          |
| 74114        | Crot        | 112        | 267          | 25            | 2659        | 87          | 193           | 26             | 1566         |
| 74116        | Pi16        | 8          | 21           | 24            | 35          | 7           | 23            | 26             | 57           |
| 74117        | Actr3       | 853        | 10447        | 18            | 29544       | 835         | 11268         | 17             | 23620        |
| 74120        | Zfp263      | 65         | 704          | 1862          | 2602        | 77          | 964           | 2011           | 2886         |
| 74121        | Acox1       | 22         | 46           | 102           | 468         | 15          | 6             | 34             | 66           |
| 74123        | Foxp4       | 85         | 16           | 91            | 114         | 98          | 31            | 82             | 169          |
| 74125        | Armc8       | 102        | 331          | 87            | 2343        | 99          | 269           | 85             | 2191         |
| 74126        | Syvn1       | 81         | 1991         | 1277          | 88          | 303         | 11131         | 5077           | 344          |
| 74129        | Dmgdh       | 5          | 3            | 23            | 33          | 4           | 3             | 17             | 49           |
| 74132        | Rnf6        | 99         | 111          | 1001          | 4186        | 105         | 121           | 881            | 3324         |
| 74134        | Cyp2s1      | 27         | 748          | 239           | 1258        | 12          | 24            | 39             | 76           |
| 74136        | Sec14l1     | 47         | 101          | 64            | 218         | 34          | 85            | 49             | 129          |
| 74140        | Tm9sf1      | 54         | 806          | 20            | 3365        | 54          | 845           | 20             | 2728         |
| 74143        | Opa1        | 146        | 147          | 34            | 1895        | 147         | 168           | 41             | 1526         |
| 74144        | Robo4       | 8          | 10           | 36            | 99          | 8           | 12            | 41             | 105          |
| 74147        | Ehhadh      | 24         | 52           | 78            | 121         | 15          | 21            | 48             | 92           |
| 74150        | Slc35f5     | 8          | 2            | 33            | 23          | 17          | 20            | 41             | 193          |
| 74153        | Ube1l       | 83         | 1839         | 1708          | 5125        | 96          | 2375          | 2049           | 8138         |
| 74159        | Acbd5       | 84         | 107          | 33            | 876         | 76          | 99            | 39             | 886          |
| 74164        | Nfx1        | 175        | 222          | 110           | 380         | 170         | 182           | 99             | 291          |
| 74167        | Nudt9       | 66         | 1394         | 267           | 4921        | 59          | 1347          | 238            | 3679         |
| 74168        | Zdhhc16     | 74         | 648          | 177           | 1597        | 70          | 653           | 172            | 1505         |
| 74176        | Tgm5        | 7          | 2            | 23            | 25          | 7           | 3             | 24             | 20           |
| 74180        | Muc5b       | 8          | 19           | 22            | 20          | 9           | 19            | 22             | 21           |
| 74182        | Prei4       | 165        | 1177         | 26            | 7424        | 301         | 2067          | 24             | 11185        |

| NCBI Gene ID | Gene Symbol | Affy. CD4+ | Agilent CD4+ | Illumina CD4+ | Nimbl. CD4+ | Affy. CD19+ | Agilent CD19+ | Illumina CD19+ | Nimbl. CD19+ |
|--------------|-------------|------------|--------------|---------------|-------------|-------------|---------------|----------------|--------------|
| 74185        | Gbe1        | 48         | 311          | 95            | 330         | 48          | 273           | 89             | 252          |
| 74186        | Ccdc3       | 6          | 2            | 30            | 25          | 7           | 3             | 28             | 32           |
| 74187        | Katnb1      | 37         | 112          | 95            | 133         | 39          | 154           | 114            | 116          |
| 74189        | Phactr3     | 13         | 30           | 41            | 47          | 12          | 806           | 42             | 42           |
| 74191        | P2ry13      | 8          | 2            | 20            | 19          | 10          | 4             | 39             | 26           |
| 74192        | Arpc5l      | 46         | 873          | 170           | 1520        | 134         | 2295          | 425            | 3182         |
| 74195        | Elp3        | 116        | 455          | 302           | 657         | 119         | 455           | 290            | 547          |
| 74197        | Gtf2e1      | 40         | 224          | 513           | 2848        | 53          | 256           | 661            | 4417         |
| 74198        | Dtx2        | 42         | 590          | 472           | 211         | 46          | 669           | 419            | 222          |
| 74199        | Vit         | 6          | 3            | 16            | 49          | 7           | 4             | 23             | 40           |
| 74201        | Lrriq2      | 101        | 356          | 940           | 3654        | 29          | 91            | 286            | 707          |
| 74203        | Eif4enif1   | 95         | 171          | 174           | 1446        | 112         | 186           | 178            | 2450         |
| 74204        | Xpo6        | 449        | 287          | 474           | 2053        | 345         | 183           | 334            | 1258         |
| 74205        | Acsl3       | 32         | 54           | 22            | 500         | 31          | 49            | 21             | 428          |
| 74237        | Tubgcp2     | 59         | 86           | 339           | 536         | 55          | 93            | 334            | 368          |
| 74239        | Iqce        | 54         | 499          | 320           | 318         | 25          | 321           | 162            | 178          |
| 74241        | U1bwg1363i  | 20         | 121          | 275           | 55          | 17          | 85            | 166            | 53           |
| 74243        | U10009g21r  | 35         | 82           | 29            | 347         | 36          | 96            | 33             | 439          |
| 74245        | Ctbs        | 16         | 7            | 25            | 166         | 18          | 10            | 28             | 354          |
| 74246        | Gale        | 11         | 342          | 50            | 54          | 13          | 508           | 51             | 72           |
| 74249        | Lrrc2       | 7          | 8            | 22            | 75          | 6           | 6             | 20             | 93           |
| 74251        | Ankrd9      | 18         | 189          | 23            | 153         | 17          | 243           | 25             | 167          |
| 74252        | Armc1       | 70         | 694          | 40            | 602         | 75          | 726           | 33             | 640          |
| 74254        | Xab1        | 21         | 381          | 198           | 835         | 23          | 368           | 186            | 866          |
| 74255        | Smu1        | 103        | 1851         | 245           | 5584        | 111         | 1863          | 246            | 5731         |
| 74256        | Cyld        | 282        | 349          | 2086          | 5638        | 200         | 229           | 1660           | 3203         |
| 74268        | Aven        | 108        | 145          | 27            | 3573        | 48          | 71            | 28             | 1240         |
| 74270        | Usp20       | 19         | 313          | 269           | 225         | 22          | 324           | 215            | 255          |
| 74277        | Chic2       | 113        | 401          | 1105          | 7598        | 115         | 326           | 850            | 4836         |
| 74287        | Kcmf1       | 228        | 1145         | 109           | 1769        | 209         | 1058          | 102            | 1707         |
| 74295        | U700092c17r | 5          | 46           | 22            | 27          | 5           | 73            | 19             | 18           |
| 74302        | Mtmr3       | 244        | 1266         | 117           | 58          | 284         | 1295          | 116            | 66           |
| 74306        | U700112c13r | 7          | 5            | 25            | 67          | 7           | 5             | 24             | 67           |
| 74309        | Osbp2       | 12         | 16           | 24            | 81          | 12          | 15            | 24             | 93           |
| 74318        | Hod         | 10         | 126          | 24            | 73          | 11          | 240           | 24             | 75           |
| 74322        | Cxxc1       | 69         | 703          | 3087          | 881         | 62          | 632           | 2414           | 627          |
| 74325        | Cltb        | 43         | 44           | 59            | 929         | 20          | 20            | 35             | 373          |
| 74326        | Hnrpr       | 121        | 982          | 36            | 13017       | 134         | 959           | 34             | 10890        |
| 74330        | Dnajc14     | 99         | 194          | 66            | 1691        | 119         | 194           | 78             | 1281         |
| 74334        | Ranbp10     | 125        | 1288         | 1591          | 3418        | 70          | 705           | 800            | 1686         |
| 74335        | Xrcc3       | 34         | 28           | 41            | 68          | 33          | 30            | 31             | 79           |
| 74337        | U432412l15r | 37         | 8            | 26            | 39          | 22          | 6             | 28             | 35           |
| 74338        | Slc6a19     | 6          | 3            | 74            | 30          | 5           | 3             | 69             | 26           |
| 74340        | U531427c17r | 186        | 135          | 823           | 9539        | 115         | 76            | 447            | 6033         |
| 74342        | Lrrtm1      | 5          | 5            | 23            | 31          | 5           | 8             | 30             | 32           |
| 74351        | Ddx23       | 136        | 37           | 53            | 149         | 129         | 37            | 46             | 153          |
| 74352        | Zfp84       | 114        | 51           | 28            | 810         | 110         | 54            | 29             | 835          |
| 74369        | Mei1        | 12         | 15           | 22            | 30          | 10          | 18            | 19             | 27           |
| 74370        | U32417h02r  | 106        | 275          | 478           | 122         | 77          | 218           | 478            | 104          |
| 74375        | Gcc1        | 48         | 169          | 235           | 1405        | 43          | 100           | 240            | 1235         |
| 74376        | Myo18b      | 488        | 10           | 37            | 169         | 401         | 16            | 37             | 153          |



| NCBI Gene ID | Gene Symbol | Affy. CD4+ | Agilent CD4+ | Illumina CD4+ | Nimbl. CD4+ | Affy. CD19+ | Agilent CD19+ | Illumina CD19+ | Nimbl. CD19+ |
|--------------|-------------|------------|--------------|---------------|-------------|-------------|---------------|----------------|--------------|
| 74383        | Ubp2l       | 326        | 173          | 352           | 1046        | 404         | 159           | 376            | 1057         |
| 74388        | Dpp8        | 164        | 113          | 443           | 1328        | 188         | 136           | 537            | 1547         |
| 74405        | Efhc2       | 6          | 4            | 26            | 38          | 7           | 5             | 20             | 34           |
| 74409        | 332701a20r  | 5          | 2            | 25            | 24          | 4           | 2             | 22             | 17           |
| 74412        | Gle1l       | 96         | 369          | 135           | 3493        | 100         | 332           | 139            | 3353         |
| 74413        | Mtac2d1     | 4          | 3            | 21            | 17          | 4           | 3             | 16             | 14           |
| 74424        | Tmc5        | 6          | 7            | 27            | 44          | 5           | 7             | 22             | 33           |
| 74427        | Eaf1        | 103        | 281          | 25            | 1064        | 114         | 272           | 24             | 857          |
| 74441        | Slco6c1     | 4          | 3            | 19            | 28          | 5           | 3             | 23             | 36           |
| 74443        | 333406e20r  | 12         | 65           | 38            | 126         | 11          | 38            | 38             | 54           |
| 74450        | Pank2       | 218        | 274          | 609           | 3579        | 209         | 196           | 523            | 2394         |
| 74464        | Zswim5      | 8          | 5            | 27            | 21          | 7           | 7             | 35             | 25           |
| 74469        | Taf7l       | 4          | 2            | 31            | 30          | 4           | 4             | 31             | 31           |
| 74479        | Snx11       | 70         | 76           | 622           | 506         | 105         | 79            | 1512           | 1519         |
| 74480        | Samd4       | 8          | 9            | 22            | 123         | 8           | 10            | 25             | 93           |
| 74482        | Ifitm7      | 16         | 75           | 17            | 98          | 15          | 70            | 16             | 101          |
| 74486        | Osbpl10     | 9          | 38           | 25            | 35          | 9           | 35            | 25             | 31           |
| 74488        | Lrrc15      | 6          | 17           | 31            | 21          | 6           | 20            | 35             | 18           |
| 74498        | Gorasp1     | 39         | 8            | 47            | 1553        | 34          | 9             | 49             | 2057         |
| 74499        | Sost        | 22         | 53           | 22            | 128         | 18          | 48            | 21             | 269          |
| 74504        | 110018c17r  | 48         | 2087         | 1487          | 669         | 35          | 1563          | 867            | 452          |
| 74513        | Neto2       | 6          | 20           | 85            | 140         | 5           | 12            | 70             | 40           |
| 74519        | Cyp2j9      | 5          | 2            | 32            | 57          | 5           | 3             | 32             | 44           |
| 74521        | 130415e04r  | 4          | 6            | 25            | 19          | 4           | 4             | 30             | 23           |
| 74528        | 430406i07r  | 22         | 41           | 24            | 199         | 23          | 86            | 24             | 297          |
| 74559        | Elovl7      | 20         | 69           | 33            | 1019        | 6           | 3             | 25             | 21           |
| 74569        | Ttc17       | 106        | 74           | 517           | 395         | 106         | 68            | 470            | 417          |
| 74576        | 731417b20r  | 5          | 6            | 24            | 18          | 5           | 9             | 39             | 138          |
| 74580        | 333409a17r  | 13         | 47           | 34            | 119         | 13          | 13            | 32             | 59           |
| 74585        | Sppl3       | 154        | 2211         | 1548          | 9064        | 135         | 1810          | 1452           | 9131         |
| 74596        | Cds1        | 7          | 2            | 30            | 22          | 6           | 3             | 27             | 25           |
| 74603        | Cd200r3     | 4          | 30           | 34            | 541         | 4           | 3             | 24             | 61           |
| 74617        | Scpep1      | 11         | 98           | 24            | 26          | 134         | 2187          | 25             | 336          |
| 74637        | Carkl       | 13         | 90           | 27            | 215         | 11          | 48            | 24             | 48           |
| 74649        | Cpa5        | 5          | 2            | 26            | 27          | 5           | 3             | 27             | 48           |
| 74670        | 330432o21r  | 35         | 4            | 601           | 966         | 53          | 7             | 956            | 1374         |
| 74682        | Wdr35       | 7          | 11           | 23            | 67          | 6           | 15            | 24             | 86           |
| 74708        | 330521a18r  | 3          | 3            | 25            | 17          | 4           | 6             | 25             | 20           |
| 74709        | 330505o20r  | 4          | 6            | 23            | 25          | 5           | 5             | 26             | 28           |
| 74718        | Snx16       | 11         | 16           | 48            | 844         | 11          | 23            | 53             | 887          |
| 74734        | Rhoh        | 190        | 2140         | 64            | 10348       | 142         | 1357          | 54             | 7390         |
| 74735        | Trim14      | 136        | 49           | 88            | 288         | 138         | 42            | 61             | 243          |
| 74737        | Pcf11       | 185        | 180          | 307           | 7594        | 195         | 120           | 303            | 8090         |
| 74741        | 730419i09r  | 143        | 565          | 274           | 2049        | 110         | 464           | 210            | 1308         |
| 74747        | Ddit4       | 94         | 1962         | 348           | 154         | 51          | 906           | 123            | 127          |
| 74748        | Slamf8      | 6          | 5            | 29            | 30          | 6           | 7             | 32             | 30           |
| 74754        | Dhcr24      | 91         | 943          | 78            | 1422        | 38          | 244           | 33             | 312          |
| 74760        | Rab3il1     | 9          | 15           | 23            | 25          | 9           | 10            | 27             | 20           |
| 74762        | Mdga1       | 14         | 72           | 30            | 28          | 14          | 74            | 25             | 32           |
| 74763        | 200013p24r  | 142        | 2619         | 167           | 1175        | 134         | 2572          | 133            | 1129         |
| 74769        | Pik3cb      | 47         | 32           | 150           | 632         | 14          | 4             | 39             | 102          |

| NCBI Gene ID | Gene Symbol | Affy. CD4+ | Agilent CD4+ | Illumina CD4+ | Nimbl. CD4+ | Affy. CD19+ | Agilent CD19+ | Illumina CD19+ | Nimbl. CD19+ |
|--------------|-------------|------------|--------------|---------------|-------------|-------------|---------------|----------------|--------------|
| 74777        | Sepn1       | 8          | 13           | 81            | 92          | 7           | 9             | 56             | 54           |
| 74838        | Narg1       | 107        | 676          | 141           | 2338        | 106         | 545           | 126            | 1525         |
| 74840        | Armet       | 43         | 716          | 29            | 2598        | 48          | 929           | 26             | 2896         |
| 74841        | Usp38       | 140        | 639          | 26            | 3606        | 125         | 535           | 27             | 3066         |
| 74847        | 30404a10r   | 5          | 6            | 24            | 80          | 5           | 4             | 21             | 80           |
| 74854        | 30402f06r   | 4          | 4            | 26            | 25          | 5           | 4             | 23             | 27           |
| 74855        | 30417g10r   | 5          | 2            | 37            | 49          | 6           | 3             | 42             | 34           |
| 74892        | 30447a16r   | 5          | 2            | 21            | 71          | 6           | 3             | 21             | 63           |
| 74915        | Atp6v1e2    | 7          | 54           | 28            | 57          | 8           | 41            | 26             | 82           |
| 74917        | 30474m22i   | 6          | 2            | 37            | 23          | 7           | 3             | 38             | 19           |
| 74918        | Iqca        | 9          | 3            | 36            | 54          | 10          | 5             | 33             | 53           |
| 74934        | Armc4       | 6          | 3            | 27            | 18          | 5           | 3             | 27             | 28           |
| 74954        | 700049e17r  | 4          | 2            | 25            | 60          | 5           | 3             | 25             | 47           |
| 74966        | 30471g03r   | 11         | 26           | 22            | 18          | 12          | 27            | 23             | 20           |
| 74996        | Usp47       | 178        | 230          | 514           | 7285        | 150         | 163           | 437            | 7006         |
| 74998        | Rab11fip2   | 80         | 51           | 22            | 65          | 82          | 49            | 27             | 51           |
| 75029        | Purg        | 9          | 46           | 29            | 93          | 10          | 66            | 29             | 74           |
| 75033        | 30486g11r   | 6          | 7            | 31            | 24          | 6           | 7             | 34             | 60           |
| 75050        | Kif27       | 5          | 2            | 29            | 21          | 5           | 3             | 29             | 27           |
| 75060        | 30506c21r   | 8          | 13           | 27            | 78          | 7           | 13            | 27             | 61           |
| 75062        | Sf3a3       | 158        | 2767         | 1542          | 3611        | 165         | 2484          | 1474           | 2948         |
| 75064        | Cnbp2       | 7          | 23           | 29            | 28          | 7           | 21            | 30             | 39           |
| 75079        | Zfp509      | 32         | 194          | 38            | 531         | 34          | 253           | 36             | 880          |
| 75098        | 30515g13r   | 88         | 4            | 24            | 44          | 106         | 4             | 25             | 49           |
| 75104        | Mmd2        | 6          | 2            | 24            | 21          | 7           | 4             | 27             | 33           |
| 75124        | 30519n16r   | 9          | 2            | 21            | 27          | 9           | 12            | 25             | 125          |
| 75136        | 30526h21r   | 10         | 10           | 35            | 128         | 8           | 7             | 34             | 76           |
| 75161        | 30544m13i   | 7          | 5            | 27            | 23          | 7           | 3             | 29             | 28           |
| 75163        | 30542c16r   | 6          | 2            | 37            | 16          | 6           | 3             | 34             | 21           |
| 75164        | 930527j03r  | 78         | 26           | 22            | 88          | 69          | 23            | 22             | 79           |
| 75188        | 700009j07r  | 6          | 6            | 22            | 33          | 6           | 6             | 25             | 40           |
| 75210        | Prr3        | 42         | 106          | 84            | 469         | 45          | 112           | 77             | 276          |
| 75212        | Rnf121      | 52         | 156          | 223           | 701         | 54          | 179           | 256            | 852          |
| 75216        | 30534b04r   | 25         | 21           | 42            | 53          | 51          | 24            | 59             | 96           |
| 75219        | Dusp18      | 6          | 30           | 27            | 28          | 7           | 24            | 26             | 54           |
| 75221        | Dpp3        | 90         | 1032         | 1666          | 1653        | 90          | 1127          | 1621           | 1675         |
| 75276        | Ppp1r1c     | 5          | 6            | 38            | 39          | 5           | 5             | 37             | 39           |
| 75283        | 930556l07r  | 12         | 7            | 27            | 40          | 11          | 4             | 27             | 51           |
| 75291        | Zbtb3       | 17         | 25           | 56            | 82          | 22          | 81            | 100            | 247          |
| 75292        | Prkcn       | 116        | 945          | 243           | 2806        | 102         | 675           | 198            | 1825         |
| 75296        | Fgfr1op     | 48         | 193          | 152           | 333         | 123         | 551           | 385            | 814          |
| 75302        | Asxl2       | 185        | 340          | 534           | 838         | 153         | 277           | 403            | 749          |
| 75316        | Josd3       | 103        | 519          | 168           | 5661        | 84          | 677           | 156            | 5126         |
| 75317        | 30547n16r   | 6          | 5            | 36            | 85          | 6           | 4             | 37             | 311          |
| 75320        | Etnk1       | 385        | 63           | 51            | 1377        | 576         | 53            | 67             | 1545         |
| 75328        | 30563d23r   | 7          | 12           | 24            | 91          | 7           | 8             | 26             | 253          |
| 75329        | Atf7ip2     | 5          | 5            | 21            | 51          | 4           | 3             | 21             | 64           |
| 75345        | Slamf7      | 16         | 8            | 24            | 225         | 125         | 121           | 119            | 2456         |
| 75352        | 930550l24r  | 5          | 5            | 29            | 59          | 5           | 12            | 28             | 56           |
| 75359        | 930555f03r  | 8          | 3            | 24            | 142         | 7           | 3             | 26             | 167          |
| 75388        | Boll        | 15         | 19           | 85            | 87          | 7           | 7             | 46             | 32           |

| NCBI Gene ID | Gene Symbol | Affy. CD4+ | Agilent CD4+ | Illumina CD4+ | Nimbl. CD4+ | Affy. CD19+ | Agilent CD19+ | Illumina CD19+ | Nimbl. CD19+ |
|--------------|-------------|------------|--------------|---------------|-------------|-------------|---------------|----------------|--------------|
| 75396        | Spp2        | 5          | 2            | 20            | 20          | 5           | 3             | 27             | 21           |
| 75398        | Mrpl32      | 31         | 290          | 33            | 5592        | 34          | 287           | 34             | 5160         |
| 75404        | l00001e04r  | 5          | 4            | 22            | 27          | 6           | 3             | 23             | 30           |
| 75406        | Ndufs7      | 131        | 1838         | 1195          | 5116        | 141         | 1914          | 1204           | 5431         |
| 75409        | Slitrk5     | 16         | 2            | 31            | 26          | 15          | 3             | 31             | 54           |
| 75410        | Wbp7        | 212        | 1293         | 36            | 151         | 176         | 977           | 32             | 272          |
| 75415        | Arhgap12    | 90         | 165          | 21            | 1662        | 85          | 151           | 25             | 764          |
| 75420        | Secisbp2    | 49         | 238          | 283           | 1441        | 56          | 196           | 300            | 1325         |
| 75426        | Igfbpl1     | 8          | 10           | 20            | 76          | 7           | 7             | 35             | 103          |
| 75454        | Phpt1       | 124        | 991          | 842           | 589         | 90          | 754           | 508            | 403          |
| 75472        | 700009p17r  | 7          | 19           | 20            | 64          | 7           | 50            | 27             | 271          |
| 75475        | Oplah       | 11         | 422          | 47            | 65          | 10          | 81            | 35             | 41           |
| 75477        | Pfn3        | 11         | 13           | 26            | 103         | 9           | 10            | 26             | 100          |
| 75483        | Cox8c       | 13         | 2            | 30            | 27          | 13          | 3             | 25             | 23           |
| 75485        | 700010b08r  | 8          | 16           | 28            | 18          | 11          | 11            | 25             | 24           |
| 75510        | 700023d19r  | 5          | 9            | 39            | 37          | 5           | 14            | 38             | 60           |
| 75512        | Gpx6        | 5          | 2            | 31            | 26          | 5           | 3             | 25             | 22           |
| 75521        | 700021p04r  | 5          | 7            | 23            | 22          | 5           | 3             | 26             | 19           |
| 75526        | Spinlw1     | 6          | 17           | 30            | 35          | 6           | 14            | 32             | 49           |
| 75533        | Nme5        | 4          | 4            | 35            | 44          | 5           | 5             | 28             | 42           |
| 75540        | Fpgt        | 30         | 52           | 157           | 611         | 22          | 34            | 118            | 495          |
| 75541        | 700019g17r  | 21         | 83           | 68            | 821         | 21          | 73            | 52             | 694          |
| 75552        | Paqr9       | 6          | 8            | 22            | 27          | 6           | 21            | 23             | 20           |
| 75555        | 700020d05r  | 12         | 39           | 77            | 85          | 11          | 37            | 76             | 59           |
| 75560        | Ep400       | 176        | 788          | 1950          | 581         | 157         | 567           | 1641           | 316          |
| 75563        | Dnali1      | 8          | 6            | 31            | 23          | 9           | 3             | 30             | 23           |
| 75572        | Acyp2       | 7          | 2            | 22            | 110         | 6           | 4             | 18             | 121          |
| 75580        | Zbtb4       | 93         | 1158         | 36            | 808         | 93          | 1194          | 40             | 622          |
| 75586        | i10040m23r  | 44         | 2            | 26            | 59          | 44          | 3             | 28             | 82           |
| 75590        | Dusp9       | 11         | 52           | 24            | 52          | 12          | 56            | 19             | 59           |
| 75600        | Calml4      | 10         | 2            | 23            | 30          | 8           | 3             | 28             | 31           |
| 75604        | Tm4sf5      | 11         | 9            | 29            | 108         | 9           | 10            | 28             | 109          |
| 75605        | Jarid1b     | 220        | 186          | 250           | 2727        | 100         | 98            | 118            | 985          |
| 75612        | Gns         | 55         | 241          | 282           | 451         | 268         | 1279          | 1488           | 2095         |
| 75617        | Rps25       | 1598       | 38092        | 14623         | 28611       | 1494        | 36425         | 13787          | 29716        |
| 75620        | 810422j05r  | 120        | 579          | 144           | 469         | 135         | 661           | 166            | 468          |
| 75622        | Spaca3      | 16         | 4            | 30            | 39          | 18          | 5             | 36             | 44           |
| 75623        | 700029f09r  | 49         | 192          | 547           | 3903        | 51          | 234           | 724            | 3781         |
| 75624        | Metap1      | 147        | 372          | 479           | 1961        | 141         | 348           | 487            | 1674         |
| 75625        | Mageh1      | 5          | 3            | 27            | 40          | 6           | 5             | 27             | 51           |
| 75627        | Snapc1      | 34         | 205          | 173           | 98          | 29          | 218           | 159            | 67           |
| 75632        | 700003o11r  | 8          | 4            | 23            | 53          | 7           | 3             | 22             | 38           |
| 75645        | 700011f14r  | 5          | 2            | 21            | 72          | 4           | 3             | 23             | 51           |
| 75646        | Rai14       | 7          | 9            | 23            | 21          | 7           | 8             | 27             | 21           |
| 75656        | 700020a23r  | 7          | 8            | 28            | 53          | 7           | 12            | 33             | 56           |
| 75657        | Speer4a     | 5          | 3            | 24            | 42          | 5           | 3             | 20             | 32           |
| 75669        | Pik3r4      | 79         | 5            | 124           | 686         | 165         | 8             | 286            | 931          |
| 75687        | 310066e14r  | 75         | 1233         | 128           | 247         | 56          | 762           | 89             | 241          |
| 75692        | 310073e15r  | 61         | 190          | 30            | 2397        | 67          | 205           | 34             | 2638         |
| 75698        | l10001k24r  | 22         | 46           | 31            | 216         | 29          | 50            | 30             | 189          |
| 75705        | Eif4b       | 267        | 1426         | 243           | 6425        | 258         | 1030          | 230            | 5393         |

| NCBI Gene ID | Gene Symbol | Affy. CD4+ | Agilent CD4+ | Illumina CD4+ | Nimbl. CD4+ | Affy. CD19+ | Agilent CD19+ | Illumina CD19+ | Nimbl. CD19+ |
|--------------|-------------|------------|--------------|---------------|-------------|-------------|---------------|----------------|--------------|
| 75712        | Tmem14a     | 7          | 66           | 20            | 44          | 7           | 41            | 23             | 44           |
| 75717        | Cul5        | 67         | 796          | 255           | 1270        | 63          | 854           | 240            | 1158         |
| 75723        | Amotl1      | 11         | 4            | 31            | 38          | 10          | 4             | 34             | 34           |
| 75731        | l33401n09r  | 195        | 1312         | 2029          | 10626       | 147         | 941           | 1313           | 6670         |
| 75732        | lqcd        | 23         | 612          | 32            | 176         | 19          | 543           | 28             | 108          |
| 75735        | Pank1       | 12         | 5            | 29            | 359         | 30          | 22            | 51             | 995          |
| 75736        | Bcl2l12     | 51         | 629          | 40            | 1557        | 56          | 1150          | 37             | 1690         |
| 75739        | Mpp7        | 33         | 103          | 140           | 274         | 21          | 44            | 92             | 140          |
| 75747        | Sesn3       | 295        | 1471         | 1700          | 1148        | 213         | 765           | 1448           | 597          |
| 75751        | lpo4        | 94         | 581          | 226           | 968         | 86          | 545           | 213            | 769          |
| 75767        | Rab11fip1   | 31         | 148          | 32            | 1769        | 21          | 50            | 33             | 409          |
| 75769        | 333424o15r  | 6          | 3            | 23            | 26          | 7           | 3             | 23             | 22           |
| 75770        | Brsk2       | 8          | 19           | 51            | 136         | 8           | 20            | 46             | 133          |
| 75772        | Pnpla5      | 7          | 33           | 27            | 94          | 7           | 21            | 33             | 90           |
| 75783        | 930431f12r  | 51         | 2            | 28            | 23          | 45          | 3             | 27             | 21           |
| 75788        | Smurf1      | 134        | 106          | 83            | 676         | 50          | 24            | 55             | 232          |
| 75796        | Cdyl2       | 71         | 806          | 51            | 191         | 73          | 969           | 52             | 137          |
| 75799        | 330444p10r  | 10         | 2            | 25            | 24          | 9           | 3             | 28             | 19           |
| 75805        | Nln         | 14         | 25           | 97            | 142         | 28          | 46            | 160            | 242          |
| 75826        | Senp2       | 108        | 589          | 674           | 307         | 97          | 523           | 623            | 262          |
| 75841        | Rnf139      | 150        | 397          | 51            | 1268        | 163         | 465           | 53             | 1052         |
| 75847        | 330579e17r  | 5          | 13           | 23            | 79          | 6           | 4             | 33             | 128          |
| 75870        | Tcam1       | 11         | 11           | 25            | 27          | 11          | 10            | 24             | 41           |
| 75892        | 930578i07r  | 6          | 5            | 26            | 15          | 6           | 15            | 26             | 18           |
| 75953        | Samd7       | 6          | 4            | 39            | 20          | 8           | 7             | 33             | 24           |
| 75956        | Srrm2       | 1095       | 2610         | 321           | 117         | 956         | 2528          | 242            | 94           |
| 75964        | 330074e01r  | 188        | 34           | 287           | 145         | 194         | 29            | 250            | 113          |
| 75974        | Dock11      | 629        | 2288         | 1198          | 1562        | 635         | 1682          | 1340           | 967          |
| 75986        | Agmat       | 14         | 30           | 20            | 33          | 11          | 30            | 25             | 30           |
| 76014        | 330416a07r  | 170        | 697          | 601           | 1543        | 173         | 645           | 518            | 1386         |
| 76025        | Cant1       | 75         | 83           | 34            | 1242        | 74          | 61            | 34             | 1071         |
| 76055        | Mgea5       | 390        | 4366         | 792           | 9451        | 306         | 3440          | 532            | 6647         |
| 76074        | 830443l24r  | 146        | 165          | 24            | 10643       | 25          | 13            | 24             | 1225         |
| 76080        | 330472m02l  | 78         | 730          | 66            | 1278        | 221         | 1655          | 660            | 2617         |
| 76088        | Dock8       | 615        | 2362         | 24            | 2939        | 499         | 1718          | 22             | 1684         |
| 76089        | Rapgef2     | 80         | 412          | 191           | 3008        | 39          | 109           | 79             | 875          |
| 76113        | Lpo         | 9          | 120          | 22            | 45          | 8           | 111           | 28             | 57           |
| 76117        | Arhgap15    | 636        | 1735         | 807           | 6934        | 354         | 911           | 387            | 4193         |
| 76123        | Gpsm2       | 19         | 149          | 25            | 73          | 7           | 13            | 30             | 23           |
| 76132        | 330409e13r  | 6          | 36           | 31            | 52          | 6           | 32            | 33             | 71           |
| 76142        | Ppp1r14c    | 7          | 950          | 37            | 54          | 6           | 1715          | 39             | 22           |
| 76157        | Slc35d3     | 9          | 3            | 31            | 63          | 9           | 6             | 30             | 60           |
| 76161        | 330527o06r  | 7          | 4            | 24            | 41          | 10          | 5             | 28             | 44           |
| 76167        | 330548g22r  | 12         | 58           | 34            | 195         | 17          | 138           | 31             | 348          |
| 76178        | 330578e17r  | 86         | 519          | 26            | 3112        | 80          | 402           | 30             | 1650         |
| 76183        | Bruno16     | 10         | 4            | 21            | 34          | 12          | 3             | 17             | 28           |
| 76184        | Abca6       | 4          | 13           | 25            | 24          | 5           | 16            | 26             | 40           |
| 76187        | Adhfe1      | 8          | 6            | 24            | 37          | 7           | 8             | 28             | 121          |
| 76205        | Stard3nl    | 15         | 263          | 159           | 191         | 14          | 330           | 174            | 169          |
| 76229        | 430701c03r  | 9          | 7            | 21            | 44          | 9           | 6             | 26             | 38           |
| 76233        | Dnttip1     | 156        | 1759         | 2092          | 6491        | 127         | 1344          | 1533           | 5879         |

| NCBI<br>Gene ID | Gene<br>Symbol | Affy.<br>CD4+ | Agilent<br>CD4+ | Illumina<br>CD4+ | Nimbl.<br>CD4+ | Affy.<br>CD19+ | Agilent<br>CD19+ | Illumina<br>CD19+ | Nimbl.<br>CD19+ |
|-----------------|----------------|---------------|-----------------|------------------|----------------|----------------|------------------|-------------------|-----------------|
| 76237           | 130628n08r     | 8             | 2               | 21               | 32             | 8              | 3                | 30                | 32              |
| 76238           | Grhpr          | 59            | 648             | 232              | 1134           | 88             | 1273             | 309               | 1505            |
| 76251           | 510007p08r     | 28            | 4               | 45               | 161            | 31             | 5                | 43                | 137             |
| 76257           | Slc38a3        | 7             | 26              | 22               | 28             | 7              | 16               | 23                | 29              |
| 76260           | Ttc8           | 6             | 2               | 35               | 100            | 6              | 5                | 34                | 182             |
| 76263           | Gstk1          | 10            | 250             | 412              | 1778           | 8              | 111              | 197               | 821             |
| 76267           | Fads1          | 30            | 49              | 513              | 951            | 9              | 17               | 73                | 110             |
| 76273           | Ndfip2         | 108           | 169             | 169              | 3389           | 78             | 110              | 129               | 1797            |
| 76279           | Cyp2d26        | 12            | 39              | 34               | 67             | 9              | 28               | 32                | 63              |
| 76281           | Tax1bp3        | 32            | 170             | 509              | 319            | 24             | 123              | 383               | 296             |
| 76282           | Gpt1           | 12            | 158             | 448              | 144            | 13             | 121              | 296               | 82              |
| 76293           | Mfap4          | 6             | 9               | 24               | 26             | 6              | 10               | 22                | 15              |
| 76294           | Asb5           | 5             | 2               | 20               | 37             | 5              | 4                | 22                | 32              |
| 76295           | Atp11b         | 501           | 527             | 498              | 19287          | 210            | 200              | 224               | 8975            |
| 76299           | Txndc4         | 99            | 685             | 180              | 1277           | 145            | 817              | 208               | 2000            |
| 76302           | Pcnp           | 335           | 1621            | 82               | 11462          | 313            | 1513             | 68                | 9876            |
| 76303           | Osbp           | 122           | 102             | 307              | 1066           | 137            | 86               | 331               | 877             |
| 76332           | Cog2           | 101           | 137             | 213              | 229            | 93             | 146              | 192               | 204             |
| 76338           | Rab2b          | 18            | 159             | 31               | 208            | 20             | 193              | 28                | 267             |
| 76365           | Tbx18          | 5             | 2               | 23               | 20             | 6              | 3                | 22                | 20              |
| 76366           | Gtf3a          | 114           | 713             | 221              | 8768           | 112            | 641              | 138               | 7399            |
| 76367           | Trp53rk        | 10            | 89              | 66               | 840            | 11             | 133              | 53                | 1798            |
| 76376           | Slc24a2        | 5             | 2               | 23               | 19             | 6              | 3                | 25                | 26              |
| 76378           | Ropn1          | 5             | 4               | 29               | 34             | 6              | 4                | 30                | 62              |
| 76400           | Pbp2           | 7             | 2               | 14               | 67             | 7              | 3                | 19                | 85              |
| 76407           | Spag4l         | 5             | 7               | 19               | 100            | 5              | 8                | 26                | 386             |
| 76408           | Abcc3          | 9             | 21              | 22               | 38             | 10             | 23               | 23                | 39              |
| 76413           | 700016d06r     | 5             | 2               | 15               | 60             | 5              | 5                | 24                | 34              |
| 76421           | 700028k03r     | 8             | 5               | 29               | 21             | 9              | 6                | 31                | 42              |
| 76422           | 10006m14i      | 11            | 16              | 21               | 23             | 10             | 20               | 21                | 28              |
| 76429           | 310007h09r     | 15            | 45              | 28               | 73             | 12             | 53               | 28                | 61              |
| 76441           | Daam2          | 6             | 8               | 50               | 52             | 6              | 11               | 44                | 54              |
| 76444           | Krtap4-7       | 10            | 14              | 27               | 16             | 9              | 13               | 20                | 20              |
| 76454           | Fbxo31         | 43            | 340             | 138              | 97             | 32             | 301              | 118               | 80              |
| 76459           | Car12          | 10            | 7               | 93               | 152            | 8              | 3                | 27                | 51              |
| 76477           | Pcolce2        | 5             | 3               | 31               | 44             | 5              | 5                | 30                | 55              |
| 76497           | Ppp1r11        | 80            | 117             | 1012             | 5717           | 122            | 221              | 1303              | 7746            |
| 76498           | Paqr4          | 30            | 37              | 45               | 480            | 26             | 33               | 45                | 325             |
| 76499           | Clasp2         | 101           | 102             | 31               | 172            | 80             | 90               | 30                | 93              |
| 76501           | CommD9         | 22            | 132             | 76               | 415            | 25             | 138              | 75                | 477             |
| 76507           | Abp1           | 5             | 2               | 26               | 31             | 5              | 3                | 24                | 26              |
| 76509           | 500029d21r     | 8             | 13              | 26               | 52             | 8              | 12               | 18                | 37              |
| 76510           | 310044a24r     | 62            | 764             | 67               | 2022           | 60             | 746              | 62                | 1998            |
| 76522           | Lsm8           | 67            | 570             | 599              | 8266           | 51             | 442              | 477               | 7476            |
| 76524           | Cln6           | 70            | 96              | 84               | 289            | 31             | 27               | 36                | 66              |
| 76560           | Prss8          | 9             | 2               | 22               | 29             | 8              | 3                | 24                | 32              |
| 76561           | Snx7           | 4             | 9               | 26               | 69             | 4              | 4                | 27                | 92              |
| 76563           | Qrsl1          | 36            | 254             | 504              | 274            | 65             | 437              | 1033              | 490             |
| 76582           | Ipo11          | 74            | 332             | 430              | 1973           | 75             | 260              | 336               | 1562            |
| 76589           | Unc5cl         | 16            | 160             | 33               | 300            | 12             | 80               | 35                | 250             |
| 76614           | Immt           | 134           | 823             | 781              | 3234           | 129            | 609              | 752               | 2430            |

| NCBI Gene ID | Gene Symbol | Affy. CD4+ | Agilent CD4+ | Illumina CD4+ | Nimbl. CD4+ | Affy. CD19+ | Agilent CD19+ | Illumina CD19+ | Nimbl. CD19+ |
|--------------|-------------|------------|--------------|---------------|-------------|-------------|---------------|----------------|--------------|
| 76627        | '00110m21i  | 9          | 30           | 29            | 136         | 9           | 32            | 29             | 129          |
| 76645        | Pkd1l2      | 8          | 12           | 30            | 82          | 9           | 11            | 29             | 100          |
| 76652        | Arpm1       | 10         | 23           | 25            | 57          | 9           | 24            | 31             | 81           |
| 76654        | Upp2        | 6          | 3            | 27            | 69          | 5           | 3             | 24             | 71           |
| 76668        | Mdh1b       | 4          | 35           | 17            | 64          | 4           | 27            | 18             | 98           |
| 76679        | 330417h12r  | 19         | 2            | 25            | 26          | 20          | 3             | 26             | 27           |
| 76681        | Trim12      | 227        | 3822         | 22            | 5987        | 243         | 4297          | 19             | 5100         |
| 76688        | Arfrp1      | 139        | 148          | 276           | 5900        | 116         | 141           | 202            | 4079         |
| 76701        | Ctrc        | 13         | 15           | 28            | 30          | 11          | 17            | 32             | 36           |
| 76703        | Cpb1        | 6          | 20           | 34            | 19          | 6           | 18            | 33             | 17           |
| 76705        | 700023i07r  | 4          | 2            | 20            | 63          | 5           | 3             | 20             | 64           |
| 76707        | Clasp1      | 106        | 130          | 71            | 2651        | 204         | 266           | 112            | 3048         |
| 76709        | Arpc2       | 745        | 1724         | 6381          | 38774       | 730         | 1338          | 5379           | 33223        |
| 76722        | Ckmt2       | 5          | 2            | 22            | 26          | 5           | 8             | 21             | 26           |
| 76742        | Snx27       | 93         | 150          | 337           | 363         | 88          | 164           | 350            | 334          |
| 76757        | Trdn        | 31         | 3            | 24            | 17          | 35          | 3             | 24             | 30           |
| 76763        | Mospd2      | 23         | 26           | 25            | 366         | 29          | 43            | 22             | 387          |
| 76781        | Mettl4      | 26         | 6            | 42            | 823         | 33          | 4             | 43             | 645          |
| 76784        | Mtif2       | 71         | 358          | 57            | 2321        | 74          | 299           | 50             | 1945         |
| 76793        | Snip1       | 63         | 215          | 227           | 720         | 63          | 215           | 236            | 711          |
| 76804        | Jmjd2c      | 118        | 272          | 76            | 296         | 113         | 300           | 76             | 214          |
| 76808        | Rpl18a      | 3184       | 57322        | 10903         | 35248       | 3138        | 63289         | 9647           | 37592        |
| 76809        | Bri3bp      | 68         | 541          | 24            | 1650        | 89          | 947           | 24             | 2696         |
| 76813        | Armc6       | 20         | 191          | 97            | 94          | 19          | 176           | 92             | 112          |
| 76816        | Sdccag8     | 40         | 31           | 24            | 4994        | 56          | 47            | 26             | 7514         |
| 76829        | Dok5        | 5          | 2            | 31            | 121         | 5           | 3             | 29             | 144          |
| 76850        | Eif2c4      | 6          | 64           | 117           | 50          | 13          | 65            | 125            | 232          |
| 76856        | Catsper3    | 5          | 15           | 26            | 42          | 5           | 16            | 24             | 43           |
| 76857        | 321517n04r  | 92         | 61           | 20            | 691         | 81          | 42            | 19             | 760          |
| 76877        | Rab36       | 7          | 3            | 23            | 30          | 8           | 3             | 21             | 31           |
| 76884        | Cyfp2       | 435        | 672          | 859           | 1651        | 463         | 543           | 896            | 1568         |
| 76889        | Adck4       | 40         | 144          | 86            | 279         | 46          | 145           | 98             | 323          |
| 76893        | Lass2       | 165        | 605          | 436           | 1276        | 194         | 580           | 449            | 1073         |
| 76895        | Bicd2       | 80         | 465          | 664           | 2256        | 77          | 344           | 629            | 1880         |
| 76898        | B3gat1      | 15         | 13           | 34            | 124         | 15          | 6             | 37             | 234          |
| 76899        | Golga1      | 47         | 175          | 137           | 975         | 46          | 227           | 173            | 1478         |
| 76900        | Ssbp4       | 78         | 1078         | 1466          | 84          | 44          | 387           | 492            | 72           |
| 76901        | Phf15       | 128        | 683          | 43            | 2704        | 103         | 419           | 43             | 2250         |
| 76905        | Lrg1        | 9          | 49           | 53            | 27          | 8           | 39            | 52             | 25           |
| 76920        | Arrdc5      | 8          | 15           | 23            | 40          | 9           | 13            | 21             | 38           |
| 76921        | 700013d24r  | 10         | 2            | 21            | 27          | 8           | 3             | 25             | 33           |
| 76927        | 700021c14r  | 18         | 223          | 326           | 929         | 19          | 227           | 261            | 1054         |
| 76932        | Arfp2       | 48         | 105          | 92            | 347         | 54          | 172           | 116            | 390          |
| 76936        | Hnrpm       | 673        | 9794         | 3978          | 31145       | 628         | 8570          | 3373           | 28970        |
| 76938        | Rbm17       | 86         | 1605         | 721           | 11208       | 89          | 1658          | 775            | 8939         |
| 76952        | Nt5c2       | 51         | 41           | 58            | 2682        | 94          | 77            | 84             | 4020         |
| 76954        | St5         | 7          | 22           | 38            | 22          | 7           | 17            | 36             | 22           |
| 76960        | Bcas1       | 5          | 75           | 34            | 284         | 5           | 74            | 45             | 341          |
| 76965        | Slitrk1     | 7          | 2            | 31            | 23          | 6           | 3             | 31             | 24           |
| 76969        | Chst1       | 9          | 22           | 28            | 88          | 9           | 35            | 45             | 122          |
| 76974        | 190003j15r  | 9          | 64           | 34            | 42          | 8           | 47            | 34             | 38           |

| NCBI Gene ID | Gene Symbol | Affy. CD4+ | Agilent CD4+ | Illumina CD4+ | Nimbl. CD4+ | Affy. CD19+ | Agilent CD19+ | Illumina CD19+ | Nimbl. CD19+ |
|--------------|-------------|------------|--------------|---------------|-------------|-------------|---------------|----------------|--------------|
| 76983        | Scfd1       | 60         | 214          | 274           | 5260        | 65          | 240           | 273            | 5446         |
| 77011        | 730590g19r  | 8          | 11           | 27            | 23          | 11          | 13            | 26             | 24           |
| 77018        | Col25a1     | 12         | 17           | 31            | 26          | 12          | 18            | 33             | 39           |
| 77031        | Slc9a8      | 154        | 491          | 143           | 360         | 161         | 556           | 147            | 462          |
| 77038        | Zfp289      | 202        | 791          | 844           | 951         | 171         | 800           | 675            | 847          |
| 77042        | Hyal4       | 4          | 4            | 27            | 29          | 4           | 6             | 30             | 37           |
| 77044        | Arid2       | 185        | 1515         | 1343          | 283         | 156         | 994           | 889            | 288          |
| 77045        | Bcl7a       | 78         | 333          | 388           | 437         | 119         | 934           | 894            | 1119         |
| 77053        | Unc84a      | 77         | 1077         | 398           | 207         | 69          | 968           | 337            | 177          |
| 77113        | Klhl2       | 71         | 111          | 53            | 934         | 48          | 77            | 51             | 597          |
| 77116        | Mtmr2       | 78         | 33           | 43            | 6710        | 88          | 45            | 46             | 6418         |
| 77219        | Zadh1       | 29         | 197          | 94            | 833         | 26          | 278           | 108            | 991          |
| 77264        | Zfp142      | 93         | 31           | 60            | 356         | 83          | 34            | 63             | 311          |
| 77265        | 130002a10r  | 12         | 31           | 59            | 73          | 13          | 25            | 51             | 69           |
| 77337        | Akr1c21     | 5          | 18           | 25            | 20          | 5           | 16            | 25             | 19           |
| 77371        | Sec24a      | 71         | 138          | 56            | 130         | 56          | 94            | 49             | 52           |
| 77407        | Rab35       | 181        | 1901         | 1067          | 381         | 147         | 1369          | 806            | 177          |
| 77432        | 130002b09r  | 5          | 2            | 28            | 27          | 5           | 3             | 31             | 38           |
| 77480        | 330002i19r  | 284        | 1712         | 2378          | 14940       | 192         | 1189          | 1820           | 8631         |
| 77485        | Stk31       | 4          | 2            | 36            | 25          | 4           | 3             | 36             | 19           |
| 77559        | Agl         | 12         | 14           | 84            | 255         | 31          | 52            | 208            | 806          |
| 77573        | Vps33a      | 124        | 129          | 63            | 488         | 158         | 157           | 63             | 720          |
| 77578        | Bcl9        | 124        | 70           | 236           | 33          | 145         | 76            | 252            | 50           |
| 77579        | Myh10       | 9          | 6            | 31            | 50          | 9           | 6             | 33             | 35           |
| 77582        | Leng4       | 55         | 535          | 27            | 1413        | 55          | 588           | 34             | 1678         |
| 77590        | 631426j05r  | 32         | 115          | 78            | 270         | 229         | 725           | 456            | 1466         |
| 77596        | Gpr110      | 5          | 7            | 18            | 42          | 5           | 5             | 18             | 36           |
| 77605        | H2afv       | 147        | 6951         | 2250          | 3178        | 167         | 7628          | 2261           | 4083         |
| 77622        | Apex2       | 41         | 142          | 20            | 382         | 43          | 172           | 18             | 414          |
| 77629        | 130544g21r  | 5          | 6            | 41            | 35          | 4           | 3             | 40             | 21           |
| 77630        | Prdm8       | 9          | 8            | 25            | 48          | 8           | 7             | 29             | 37           |
| 77634        | Snopc3      | 208        | 152          | 105           | 691         | 202         | 158           | 133            | 1046         |
| 77674        | Defb12      | 7          | 2            | 20            | 18          | 8           | 3             | 21             | 17           |
| 77683        | Ehmt1       | 104        | 1563         | 770           | 5162        | 100         | 1093          | 670            | 4991         |
| 77697        | Mmab        | 20         | 26           | 86            | 60          | 18          | 38            | 79             | 49           |
| 77705        | 230104l09r  | 4          | 2            | 19            | 18          | 4           | 3             | 23             | 24           |
| 77721        | Mrps5       | 66         | 866          | 1236          | 7989        | 48          | 618           | 778            | 4271         |
| 77739        | Adamts1     | 9          | 18           | 35            | 18          | 8           | 18            | 31             | 29           |
| 77766        | Elp4        | 39         | 47           | 38            | 87          | 41          | 45            | 35             | 87           |
| 77771        | 1330102k23r | 8          | 5            | 28            | 26          | 9           | 3             | 27             | 22           |
| 77781        | Epm2aip1    | 45         | 206          | 176           | 1250        | 33          | 120           | 116            | 874          |
| 77782        | Polq        | 12         | 2            | 30            | 37          | 16          | 4             | 27             | 42           |
| 77799        | Sla2        | 107        | 315          | 192           | 406         | 13          | 23            | 31             | 55           |
| 77836        | Mlana       | 11         | 2            | 30            | 59          | 10          | 3             | 33             | 54           |
| 77864        | Ypel2       | 16         | 8            | 33            | 46          | 17          | 3             | 36             | 69           |
| 77883        | 130498e09r  | 5          | 6            | 24            | 27          | 4           | 3             | 23             | 31           |
| 77889        | Lbh         | 383        | 181          | 552           | 1124        | 490         | 250           | 633            | 1628         |
| 77891        | Ube2s       | 100        | 1425         | 65            | 2714        | 95          | 1456          | 66             | 2108         |
| 77918        | Krtap16-5   | 5          | 2            | 21            | 19          | 5           | 3             | 16             | 24           |
| 77938        | 1330008g19r | 131        | 85           | 127           | 2336        | 67          | 35            | 76             | 1737         |
| 77945        | Rpgrip1     | 12         | 686          | 1088          | 545         | 17          | 1296          | 1343           | 1363         |

| NCBI Gene ID | Gene Symbol | Affy. CD4+ | Agilent CD4+ | Illumina CD4+ | Nimbl. CD4+ | Affy. CD19+ | Agilent CD19+ | Illumina CD19+ | Nimbl. CD19+ |
|--------------|-------------|------------|--------------|---------------|-------------|-------------|---------------|----------------|--------------|
| 77951        | Cyp20a1     | 22         | 46           | 53            | 187         | 27          | 59            | 71             | 546          |
| 77963        | Hook1       | 47         | 129          | 89            | 27          | 46          | 112           | 90             | 21           |
| 77974        | Rdh12       | 14         | 961          | 29            | 144         | 42          | 710           | 70             | 643          |
| 77980        | Sbf1        | 394        | 255          | 140           | 385         | 224         | 103           | 65             | 202          |
| 77981        | 230110c06r  | 6          | 2            | 35            | 26          | 7           | 3             | 35             | 25           |
| 77994        | 310055g20r  | 9          | 9            | 21            | 41          | 10          | 9             | 26             | 58           |
| 77998        | Grifin      | 22         | 93           | 93            | 418         | 18          | 21            | 33             | 114          |
| 78038        | Mccc2       | 17         | 13           | 41            | 386         | 19          | 14            | 42             | 649          |
| 78070        | Cpt1c       | 10         | 3            | 29            | 28          | 9           | 3             | 27             | 27           |
| 78111        | 330451e10r  | 5          | 8            | 31            | 30          | 6           | 6             | 26             | 24           |
| 78128        | Spag11      | 10         | 9            | 31            | 29          | 9           | 9             | 30             | 32           |
| 78134        | Gpr23       | 5          | 8            | 25            | 40          | 5           | 13            | 30             | 64           |
| 78232        | Trappc6b    | 110        | 467          | 644           | 13568       | 117         | 479           | 635            | 11284        |
| 78240        | Cst11       | 8          | 7            | 39            | 45          | 8           | 11            | 39             | 64           |
| 78248        | Armcx1      | 8          | 25           | 48            | 144         | 6           | 4             | 27             | 25           |
| 78284        | Creb3l4     | 6          | 3            | 22            | 37          | 5           | 4             | 26             | 53           |
| 78287        | Zfyve20     | 38         | 126          | 229           | 2525        | 40          | 140           | 223            | 2631         |
| 78294        | Rps27a      | 693        | 43289        | 20567         | 23296       | 656         | 35581         | 19251          | 21302        |
| 78303        | Hist3h2ba   | 14         | 291          | 112           | 427         | 13          | 177           | 89             | 482          |
| 78308        | Gpr108      | 74         | 617          | 609           | 2990        | 97          | 630           | 657            | 3804         |
| 78309        | Parc        | 22         | 322          | 28            | 251         | 20          | 359           | 27             | 216          |
| 78321        | Ankrd23     | 64         | 460          | 170           | 343         | 42          | 219           | 104            | 228          |
| 78330        | 500032d16r  | 40         | 1107         | 2636          | 6700        | 35          | 705           | 1703           | 5838         |
| 78339        | Ttyh3       | 306        | 2111         | 521           | 218         | 184         | 1057          | 222            | 228          |
| 78369        | Icam4       | 9          | 6            | 30            | 53          | 10          | 8             | 28             | 30           |
| 78376        | Ng23        | 21         | 8            | 41            | 61          | 22          | 52            | 135            | 463          |
| 78388        | Mvp         | 32         | 80           | 551           | 319         | 42          | 157           | 728            | 401          |
| 78394        | Ddx52       | 69         | 57           | 624           | 3508        | 80          | 51            | 672            | 3246         |
| 78405        | Ntf5        | 7          | 5            | 18            | 80          | 7           | 6             | 21             | 88           |
| 78416        | Rnase6      | 12         | 6            | 24            | 93          | 481         | 2210          | 2450           | 11553        |
| 78455        | Helz        | 190        | 491          | 381           | 238         | 154         | 292           | 270            | 129          |
| 78478        | 700129i15r  | 5          | 4            | 29            | 69          | 5           | 6             | 28             | 118          |
| 78514        | Arhgap10    | 67         | 169          | 40            | 60          | 14          | 25            | 26             | 41           |
| 78523        | Mrpl9       | 107        | 146          | 453           | 15242       | 77          | 106           | 297            | 10096        |
| 78541        | Asb8        | 86         | 402          | 632           | 587         | 89          | 368           | 586            | 518          |
| 78558        | Htra3       | 11         | 43           | 40            | 48          | 13          | 41            | 44             | 51           |
| 78560        | Gpr124      | 13         | 42           | 25            | 15          | 12          | 37            | 27             | 17           |
| 78593        | Nrip3       | 6          | 20           | 36            | 52          | 5           | 13            | 30             | 14           |
| 78600        | Pde6h       | 7          | 10           | 36            | 29          | 8           | 19            | 32             | 29           |
| 78618        | Centb2      | 122        | 620          | 48            | 17187       | 126         | 562           | 52             | 13297        |
| 78619        | Zfp449      | 5          | 17           | 27            | 15          | 5           | 10            | 29             | 15           |
| 78651        | Lsm6        | 65         | 1139         | 100           | 3616        | 81          | 1560          | 172            | 2958         |
| 78656        | Brd8        | 80         | 200          | 217           | 2218        | 109         | 197           | 241            | 2960         |
| 78670        | Plekhj1     | 82         | 286          | 64            | 545         | 96          | 277           | 57             | 516          |
| 78688        | Nol3        | 6          | 3            | 96            | 87          | 6           | 3             | 125            | 102          |
| 78689        | Mak10       | 97         | 864          | 197           | 5590        | 106         | 1042          | 189            | 5896         |
| 78723        | 530049n12r  | 5          | 6            | 22            | 70          | 5           | 11            | 26             | 119          |
| 78725        | 730001g18r  | 7          | 13           | 28            | 73          | 8           | 14            | 25             | 68           |
| 78748        | 632411j06r  | 8          | 5            | 36            | 31          | 9           | 3             | 35             | 32           |
| 78752        | Galnact2    | 47         | 246          | 24            | 463         | 49          | 249           | 26             | 347          |
| 78757        | 321505c17r  | 242        | 202          | 1335          | 2898        | 160         | 124           | 821            | 1594         |



| NCBI Gene ID | Gene Symbol | Affy. CD4+ | Agilent CD4+ | Illumina CD4+ | Nimbl. CD4+ | Affy. CD19+ | Agilent CD19+ | Illumina CD19+ | Nimbl. CD19+ |
|--------------|-------------|------------|--------------|---------------|-------------|-------------|---------------|----------------|--------------|
| 78774        | l30529m08i  | 7          | 4            | 25            | 21          | 7           | 6             | 27             | 30           |
| 78777        | 410002i01r  | 52         | 162          | 68            | 262         | 51          | 136           | 62             | 322          |
| 78781        | Zc3hav1     | 247        | 2759         | 1152          | 1147        | 147         | 1461          | 735            | 424          |
| 78783        | Brpf1       | 113        | 825          | 152           | 1323        | 109         | 669           | 116            | 1518         |
| 78784        | Tnrc4       | 9          | 10           | 26            | 79          | 8           | 9             | 27             | 76           |
| 78787        | Usp54       | 18         | 75           | 83            | 82          | 17          | 80            | 84             | 81           |
| 78792        | 930432f04r  | 9          | 12           | 28            | 314         | 10          | 14            | 26             | 210          |
| 78796        | Zcchc4      | 43         | 51           | 93            | 224         | 44          | 73            | 104            | 234          |
| 78797        | Ndor1       | 73         | 280          | 296           | 324         | 75          | 227           | 266            | 333          |
| 78798        | Eml4        | 119        | 128          | 375           | 6055        | 387         | 444           | 1381           | 12926        |
| 78803        | Fbxo43      | 7          | 3            | 24            | 22          | 6           | 3             | 22             | 27           |
| 78808        | Stxbp5      | 141        | 80           | 341           | 211         | 90          | 39            | 220            | 80           |
| 78816        | Gmip        | 145        | 628          | 699           | 1514        | 184         | 827           | 792            | 1670         |
| 78825        | 330417c01r  | 54         | 421          | 310           | 3155        | 34          | 245           | 201            | 1925         |
| 78826        | P2ry10      | 100        | 405          | 133           | 1678        | 210         | 770           | 258            | 2986         |
| 78830        | Slc25a12    | 244        | 1281         | 233           | 2939        | 111         | 630           | 109            | 1463         |
| 78889        | Wsb1        | 197        | 98           | 589           | 1665        | 308         | 171           | 886            | 1923         |
| 78891        | Scyl1       | 77         | 1939         | 321           | 554         | 90          | 1895          | 308            | 794          |
| 78893        | Cnot10      | 93         | 264          | 421           | 813         | 91          | 281           | 375            | 686          |
| 78894        | Aacs        | 50         | 461          | 455           | 401         | 52          | 528           | 426            | 397          |
| 78896        | 500015o10r  | 9          | 3            | 31            | 40          | 9           | 2             | 29             | 33           |
| 78903        | Wrnip1      | 84         | 700          | 82            | 646         | 94          | 681           | 57             | 507          |
| 78908        | Igsf3       | 12         | 42           | 96            | 76          | 9           | 9             | 65             | 32           |
| 78910        | Asb15       | 5          | 2            | 30            | 39          | 6           | 3             | 33             | 53           |
| 78911        | Trim42      | 6          | 2            | 27            | 31          | 7           | 3             | 21             | 35           |
| 78912        | Sp2         | 46         | 13           | 163           | 58          | 39          | 10            | 112            | 71           |
| 78913        | Zfp294      | 170        | 154          | 121           | 3307        | 168         | 115           | 123            | 2379         |
| 78920        | Dlst        | 124        | 865          | 691           | 3480        | 121         | 907           | 653            | 2816         |
| 78925        | Srd5a1      | 5          | 12           | 20            | 53          | 5           | 11            | 28             | 38           |
| 78926        | Gas2l1      | 9          | 8            | 24            | 86          | 9           | 7             | 24             | 162          |
| 78928        | Pigt        | 184        | 111167       | 840           | 8483        | 195         | 57537         | 883            | 9692         |
| 78929        | Polr3h      | 19         | 5            | 120           | 91          | 26          | 6             | 274            | 105          |
| 78931        | 930546c10r  | 7          | 6            | 34            | 54          | 7           | 4             | 32             | 51           |
| 78933        | 931433a01r  | 4          | 3            | 21            | 34          | 4           | 3             | 27             | 32           |
| 78938        | Fbxo34      | 65         | 176          | 368           | 293         | 65          | 158           | 294            | 247          |
| 78943        | Ern1        | 16         | 34           | 63            | 36          | 17          | 32            | 79             | 40           |
| 79044        | Mrps34      | 74         | 2977         | 938           | 1971        | 62          | 2633          | 915            | 1767         |
| 79059        | Nme3        | 29         | 704          | 546           | 4054        | 36          | 875           | 731            | 5073         |
| 79196        | Osbp15      | 28         | 384          | 180           | 220         | 46          | 874           | 330            | 328          |
| 79202        | Tnfrsf22    | 42         | 141          | 91            | 269         | 22          | 50            | 41             | 126          |
| 79221        | Hdac9       | 11         | 6            | 27            | 35          | 70          | 96            | 29             | 173          |
| 79233        | Zfp319      | 103        | 59           | 39            | 311         | 105         | 49            | 36             | 211          |
| 79235        | Lrat        | 5          | 2            | 35            | 16          | 6           | 3             | 32             | 20           |
| 79263        | Trim39      | 29         | 332          | 1056          | 2390        | 31          | 290           | 914            | 2001         |
| 79362        | Bhlhb3      | 7          | 9            | 24            | 28          | 35          | 14            | 20             | 45           |
| 79401        | Spz1        | 6          | 2            | 26            | 26          | 6           | 3             | 27             | 24           |
| 79455        | Pdcl2       | 4          | 5            | 21            | 16          | 4           | 12            | 23             | 17           |
| 79456        | Recql4      | 10         | 15           | 46            | 73          | 11          | 23            | 47             | 41           |
| 79464        | Lias        | 38         | 274          | 678           | 2023        | 41          | 280           | 642            | 2055         |
| 79565        | Wbscr27     | 24         | 222          | 65            | 736         | 11          | 34            | 24             | 54           |
| 80280        | Cdk5rap3    | 79         | 1837         | 1763          | 653         | 62          | 1736          | 1434           | 595          |

| NCBI<br>Gene ID | Gene<br>Symbol | Affy.<br>CD4+ | Agilent<br>CD4+ | Illumina<br>CD4+ | Nimbl.<br>CD4+ | Affy.<br>CD19+ | Agilent<br>CD19+ | Illumina<br>CD19+ | Nimbl.<br>CD19+ |
|-----------------|----------------|---------------|-----------------|------------------|----------------|----------------|------------------|-------------------|-----------------|
| 80283           | Abtb1          | 61            | 407             | 542              | 1498           | 62             | 364              | 424               | 931             |
| 80284           | Bc003266       | 74            | 1335            | 317              | 5053           | 80             | 1380             | 282               | 5853            |
| 80286           | Tusc3          | 75            | 233             | 34               | 3557           | 61             | 224              | 34                | 2580            |
| 80287           | Apobec3        | 184           | 310             | 85               | 2337           | 776            | 2512             | 323               | 11504           |
| 80288           | Bcl9l          | 159           | 139             | 774              | 86             | 108            | 103              | 366               | 145             |
| 80290           | Gpr146         | 53            | 361             | 272              | 249            | 26             | 158              | 127               | 112             |
| 80294           | Pofut2         | 44            | 250             | 67               | 249            | 37             | 219              | 55                | 157             |
| 80297           | Spnb4          | 7             | 452             | 25               | 32             | 7              | 683              | 25                | 43              |
| 80334           | Kcnip4         | 7             | 2               | 30               | 96             | 6              | 3                | 20                | 78              |
| 80384           | Tex21          | 5             | 18              | 19               | 86             | 5              | 13               | 20                | 15              |
| 80385           | Tusc2          | 59            | 689             | 84               | 1221           | 68             | 805              | 83                | 1473            |
| 80707           | Wwox           | 27            | 16              | 59               | 65             | 22             | 18               | 58                | 51              |
| 80708           | Pacsin3        | 10            | 22              | 31               | 172            | 10             | 17               | 29                | 110             |
| 80718           | Rab27b         | 5             | 3               | 30               | 19             | 5              | 3                | 26                | 19              |
| 80719           | Igsf6          | 13            | 6               | 24               | 32             | 11             | 13               | 24                | 48              |
| 80720           | Pbx4           | 26            | 59              | 50               | 286            | 32             | 109              | 63                | 606             |
| 80721           | Slc19a3        | 5             | 9               | 44               | 20             | 6              | 6                | 43                | 20              |
| 80732           | Mynn           | 44            | 50              | 134              | 2489           | 56             | 58               | 153               | 3381            |
| 80733           | Car15          | 50            | 49              | 134              | 665            | 43             | 25               | 83                | 381             |
| 80743           | Vps16          | 131           | 960             | 852              | 1222           | 141            | 901              | 807               | 1151            |
| 80744           | Bc003993       | 90            | 311             | 31               | 15186          | 97             | 344              | 30                | 13326           |
| 80749           | Lrfn1          | 23            | 10              | 21               | 36             | 20             | 4                | 21                | 45              |
| 80751           | Rnf34          | 88            | 478             | 474              | 3170           | 100            | 678              | 595               | 4389            |
| 80782           | Klrb1b         | 6             | 2               | 19               | 74             | 5              | 3                | 23                | 28              |
| 80794           | Cblc           | 8             | 19              | 27               | 58             | 8              | 23               | 30                | 99              |
| 80795           | Selk           | 52            | 3042            | 911              | 3256           | 52             | 3448             | 999               | 2906            |
| 80796           | Calm4          | 9             | 4               | 21               | 24             | 9              | 3                | 23                | 29              |
| 80797           | Clca2          | 5             | 2               | 30               | 18             | 5              | 3                | 35                | 28              |
| 80837           | Rhoj           | 6             | 5               | 38               | 25             | 7              | 5                | 36                | 28              |
| 80838           | Hist1h1a       | 52            | 35              | 32               | 100            | 95             | 34               | 31                | 151             |
| 80857           | Fgf20          | 9             | 4               | 27               | 82             | 8              | 5                | 28                | 108             |
| 80859           | Nfkbiz         | 183           | 309             | 821              | 3816           | 138            | 163              | 610               | 3232            |
| 80876           | Ifitm2         | 21            | 18              | 49               | 69             | 21             | 20               | 49                | 77              |
| 80877           | Lrba           | 161           | 181             | 436              | 815            | 151            | 104              | 375               | 728             |
| 80879           | Slc16a3        | 22            | 111             | 51               | 68             | 19             | 66               | 48                | 38              |
| 80883           | Ntng1          | 5             | 14              | 40               | 29             | 5              | 8                | 45                | 23              |
| 80884           | Maged2         | 9             | 67              | 106              | 906            | 7              | 21               | 41                | 279             |
| 80886           | Senp3          | 76            | 470             | 444              | 332            | 67             | 389              | 389               | 270             |
| 80888           | Hspb8          | 10            | 3               | 31               | 24             | 10             | 5                | 30                | 24              |
| 80889           | Mesdc1         | 13            | 61              | 48               | 558            | 19             | 174              | 73                | 900             |
| 80890           | Trim2          | 8             | 23              | 273              | 498            | 6              | 10               | 213               | 293             |
| 80891           | Msr2           | 4             | 21              | 33               | 23             | 4              | 27               | 22                | 25              |
| 80893           | Tmprss5        | 7             | 2               | 34               | 55             | 8              | 3                | 31                | 61              |
| 80898           | Arts1          | 221           | 304             | 53               | 876            | 167            | 174              | 48                | 516             |
| 80901           | Cxcr6          | 9             | 46              | 40               | 120            | 8              | 4                | 25                | 36              |
| 80902           | Zfp202         | 24            | 13              | 45               | 164            | 21             | 11               | 54                | 230             |
| 80903           | Fgf16          | 7             | 2               | 27               | 21             | 6              | 3                | 26                | 21              |
| 80904           | Dtx3           | 29            | 123             | 893              | 82             | 18             | 83               | 483               | 76              |
| 80905           | Polh           | 50            | 18              | 42               | 83             | 44             | 28               | 49                | 96              |
| 80906           | Kcnip2         | 12            | 6               | 30               | 58             | 8              | 3                | 20                | 36              |
| 80907           | Lactb          | 28            | 55              | 150              | 4933           | 46             | 84               | 254               | 7274            |

| NCBI<br>Gene ID | Gene<br>Symbol | Affy.<br>CD4+ | Agilent<br>CD4+ | Illumina<br>CD4+ | Nimbl.<br>CD4+ | Affy.<br>CD19+ | Agilent<br>CD19+ | Illumina<br>CD19+ | Nimbl.<br>CD19+ |
|-----------------|----------------|---------------|-----------------|------------------|----------------|----------------|------------------|-------------------|-----------------|
| 80908           | Abo            | 4             | 3               | 26               | 17             | 5              | 4                | 26                | 16              |
| 80909           | Gats           | 35            | 67              | 145              | 990            | 22             | 37               | 51                | 241             |
| 80910           | Gpr84          | 7             | 3               | 26               | 71             | 7              | 6                | 29                | 76              |
| 80911           | Acox3          | 68            | 336             | 23               | 503            | 133            | 701              | 30                | 901             |
| 80912           | Pum1           | 344           | 428             | 724              | 19960          | 314            | 273              | 669               | 17373           |
| 80913           | Pum2           | 429           | 1340            | 315              | 4436           | 390            | 839              | 234               | 3683            |
| 80915           | Dusp12         | 25            | 971             | 20               | 4565           | 20             | 752              | 22                | 3753            |
| 80976           | Syt13          | 12            | 14              | 25               | 44             | 13             | 11               | 25                | 59              |
| 80978           | Mrgprh         | 5             | 3               | 38               | 21             | 5              | 10               | 37                | 18              |
| 80982           | 930013l23r     | 5             | 60              | 26               | 36             | 5              | 49               | 26                | 41              |
| 80985           | Trim44         | 136           | 209             | 1348             | 8702           | 161            | 218              | 1701              | 9094            |
| 80986           | Ckap2          | 6             | 11              | 28               | 82             | 7              | 18               | 24                | 111             |
| 80987           | Nckipsd        | 27            | 82              | 81               | 59             | 32             | 124              | 104               | 86              |
| 81003           | Trim23         | 36            | 14              | 61               | 2499           | 33             | 18               | 63                | 1994            |
| 81006           | Gpr63          | 5             | 9               | 22               | 22             | 5              | 10               | 36                | 20              |
| 81007           | Defb5          | 5             | 2               | 29               | 18             | 6              | 3                | 28                | 16              |
| 81012           | V1rd7          | 5             | 5               | 18               | 29             | 4              | 6                | 14                | 35              |
| 81013           | V1rd6          | 5             | 2               | 17               | 29             | 4              | 5                | 22                | 17              |
| 81014           | V1rd4          | 4             | 28              | 23               | 21             | 4              | 20               | 26                | 27              |
| 81016           | V1rd2          | 4             | 14              | 31               | 17             | 4              | 13               | 25                | 30              |
| 81017           | V1rd1          | 4             | 4               | 32               | 22             | 4              | 5                | 30                | 21              |
| 81018           | Zfp313         | 311           | 5631            | 1394             | 2704           | 292            | 4871             | 1264              | 1919            |
| 81489           | Dnajb1         | 178           | 3660            | 2360             | 8525           | 126            | 2358             | 1631              | 6780            |
| 81535           | Sgpp1          | 154           | 191             | 632              | 1061           | 114            | 110              | 441               | 488             |
| 81601           | Htatip         | 80            | 156             | 35               | 2302           | 93             | 195              | 36                | 2695            |
| 81701           | Egfl8          | 34            | 28              | 53               | 930            | 30             | 18               | 32                | 471             |
| 81702           | Ankrd17        | 207           | 418             | 181              | 1274           | 192            | 391              | 164               | 1145            |
| 81703           | Jundm2         | 17            | 25              | 37               | 66             | 17             | 36               | 35                | 121             |
| 81799           | C1qtnf3        | 7             | 3               | 23               | 30             | 6              | 3                | 24                | 32              |
| 81840           | Sorcs2         | 18            | 42              | 34               | 223            | 16             | 46               | 26                | 101             |
| 81845           | Bat4           | 41            | 1087            | 42               | 145            | 44             | 1423             | 40                | 188             |
| 81877           | Tnxb           | 8             | 6               | 32               | 92             | 9              | 6                | 36                | 125             |
| 81879           | Tcfcp2l1       | 10            | 4               | 27               | 44             | 9              | 5                | 27                | 38              |
| 81897           | Tlr9           | 20            | 902             | 20               | 20             | 408            | 746              | 25                | 25              |
| 81898           | Sf3b1          | 957           | 197             | 45               | 2515           | 877            | 187              | 46                | 2206            |
| 81904           | Cacng7         | 8             | 53              | 19               | 143            | 9              | 54               | 22                | 130             |
| 81905           | Cacng8         | 12            | 17              | 24               | 54             | 12             | 17               | 27                | 60              |
| 81906           | Cyp4x1         | 5             | 33              | 38               | 18             | 5              | 29               | 31                | 22              |
| 81909           | Zfp1           | 28            | 409             | 58               | 212            | 29             | 483              | 54                | 211             |
| 81910           | Rrbp1          | 66            | 493             | 240              | 811            | 123            | 1002             | 395               | 1120            |
| 83380           | Prp2           | 44            | 120             | 31               | 138            | 62             | 334              | 29                | 278             |
| 83383           | Tcfap4         | 51            | 112             | 33               | 91             | 32             | 83               | 34                | 60              |
| 83395           | Sp6            | 9             | 283             | 153              | 23             | 7              | 39               | 32                | 22              |
| 83396           | Glis2          | 22            | 29              | 25               | 19             | 22             | 25               | 24                | 21              |
| 83397           | Akap12         | 19            | 211             | 107              | 252            | 53             | 891              | 234               | 404             |
| 83398           | Ndst3          | 5             | 7               | 24               | 28             | 5              | 8                | 23                | 32              |
| 83409           | Mapbpip        | 65            | 1319            | 340              | 3913           | 64             | 1792             | 307               | 4412            |
| 83410           | Cstf2t         | 42            | 1462            | 22               | 1229           | 45             | 1451             | 25                | 1109            |
| 83428           | Ucn3           | 7             | 2               | 24               | 37             | 5              | 3                | 22                | 57              |
| 83429           | Ctns           | 33            | 334             | 227              | 839            | 34             | 283              | 243               | 714             |
| 83430           | Il23a          | 6             | 3               | 22               | 20             | 6              | 4                | 21                | 26              |

| NCBI<br>Gene ID | Gene<br>Symbol | Affy.<br>CD4+ | Agilent<br>CD4+ | Illumina<br>CD4+ | Nimbl.<br>CD4+ | Affy.<br>CD19+ | Agilent<br>CD19+ | Illumina<br>CD19+ | Nimbl.<br>CD19+ |
|-----------------|----------------|---------------|-----------------|------------------|----------------|----------------|------------------|-------------------|-----------------|
| 83431           | Ndel1          | 94            | 691             | 682              | 960            | 83             | 575              | 570               | 748             |
| 83433           | Trem2          | 15            | 8               | 21               | 49             | 20             | 10               | 32                | 31              |
| 83434           | Rshl1          | 11            | 16              | 25               | 118            | 11             | 14               | 25                | 97              |
| 83435           | Plekha3        | 160           | 199             | 256              | 4268           | 144            | 146              | 235               | 3239            |
| 83436           | Plekha2        | 169           | 461             | 2044             | 987            | 510            | 1311             | 5032              | 2435            |
| 83453           | Chrdl1         | 6             | 5               | 27               | 35             | 6              | 3                | 26                | 36              |
| 83454           | Nxf2           | 4             | 2               | 25               | 29             | 4              | 3                | 27                | 27              |
| 83456           | Mov10l1        | 7             | 3               | 26               | 20             | 8              | 3                | 28                | 23              |
| 83457           | Fthl17         | 7             | 32              | 28               | 24             | 8              | 20               | 28                | 27              |
| 83486           | Rbm5           | 461           | 5055            | 435              | 8542           | 515            | 6160             | 553               | 8759            |
| 83490           | Pik3ap1        | 17            | 43              | 24               | 18             | 474            | 368              | 105               | 3145            |
| 83491           | Pramel1        | 7             | 6               | 23               | 25             | 7              | 7                | 23                | 21              |
| 83492           | Mlze           | 5             | 58              | 31               | 23             | 5              | 61               | 27                | 21              |
| 83493           | Sacm1l         | 131           | 119             | 29               | 4945           | 103            | 64               | 26                | 3659            |
| 83553           | Tktl1          | 8             | 2               | 22               | 251            | 7              | 3                | 28                | 115             |
| 83554           | Fstl3          | 16            | 85              | 26               | 82             | 18             | 86               | 29                | 143             |
| 83555           | Tex13          | 4             | 3               | 26               | 17             | 4              | 3                | 27                | 20              |
| 83556           | Tex16          | 4             | 3               | 26               | 16             | 4              | 3                | 27                | 19              |
| 83557           | Lin28          | 14            | 2               | 31               | 71             | 15             | 3                | 29                | 61              |
| 83558           | Tex11          | 4             | 2               | 25               | 30             | 4              | 3                | 26                | 26              |
| 83559           | Tex18          | 4             | 3               | 24               | 17             | 4              | 3                | 22                | 18              |
| 83560           | Tex14          | 7             | 4               | 39               | 40             | 7              | 3                | 31                | 29              |
| 83561           | Tdrd1          | 5             | 3               | 33               | 22             | 5              | 3                | 28                | 22              |
| 83563           | Usp26          | 4             | 2               | 29               | 27             | 4              | 3                | 29                | 33              |
| 83602           | Gtf2a1         | 190           | 18              | 52               | 5102           | 254            | 33               | 59                | 7726            |
| 83603           | Elov14         | 5             | 3               | 26               | 37             | 5              | 3                | 28                | 55              |
| 83669           | Wdr6           | 49            | 327             | 230              | 1887           | 56             | 362              | 240               | 2138            |
| 83671           | Syt12          | 28            | 135             | 37               | 1164           | 6              | 4                | 36                | 43              |
| 83672           | Syt13          | 24            | 10              | 39               | 211            | 23             | 7                | 35                | 458             |
| 83674           | Cnm1           | 7             | 16              | 29               | 25             | 6              | 10               | 30                | 27              |
| 83675           | Bicc1          | 7             | 21              | 68               | 122            | 6              | 32               | 64                | 119             |
| 83701           | Ars2           | 244           | 168             | 1128             | 3803           | 231            | 132              | 840               | 2849            |
| 83702           | Akr1c6         | 5             | 22              | 22               | 23             | 4              | 80               | 23                | 28              |
| 83703           | Dbr1           | 23            | 231             | 552              | 915            | 22             | 200              | 456               | 655             |
| 83704           | Slc12a9        | 48            | 59              | 64               | 96             | 56             | 98               | 65                | 113             |
| 83762           | Otof           | 11            | 20              | 32               | 53             | 12             | 24               | 32                | 78              |
| 83767           | Wasf1          | 7             | 23              | 23               | 41             | 7              | 24               | 21                | 36              |
| 83768           | Dpp7           | 19            | 146             | 178              | 245            | 38             | 506              | 517               | 579             |
| 83770           | Tas1r2         | 8             | 20              | 25               | 98             | 9              | 14               | 29                | 56              |
| 83771           | Tas1r3         | 28            | 39              | 27               | 55             | 23             | 33               | 27                | 49              |
| 83796           | Smarcd2        | 114           | 1248            | 1925             | 418            | 150            | 1852             | 2237              | 492             |
| 83797           | Smarcd1        | 83            | 33              | 103              | 98             | 94             | 34               | 86                | 92              |
| 83813           | Tnk1           | 8             | 8               | 31               | 37             | 8              | 7                | 26                | 40              |
| 83814           | Nedd4l         | 67            | 40              | 738              | 1533           | 86             | 46               | 738               | 2218            |
| 83921           | Tmem2          | 8             | 5               | 46               | 230            | 20             | 44               | 138               | 840             |
| 83922           | Tsga14         | 25            | 73              | 151              | 375            | 19             | 46               | 106               | 192             |
| 83925           | Trps1          | 39            | 131             | 171              | 1659           | 55             | 186              | 269               | 1896            |
| 83945           | Dnaja3         | 81            | 524             | 1007             | 1164           | 77             | 440              | 921               | 842             |
| 83946           | Phip           | 279           | 1356            | 395              | 4592           | 412            | 1876             | 593               | 5162            |
| 83962           | Btbd1          | 149           | 728             | 511              | 603            | 177            | 831              | 616               | 799             |
| 83964           | Jam3           | 6             | 7               | 33               | 44             | 5              | 15               | 43                | 69              |

| NCBI Gene ID | Gene Symbol | Affy. CD4+ | Agilent CD4+ | Illumina CD4+ | Nimbl. CD4+ | Affy. CD19+ | Agilent CD19+ | Illumina CD19+ | Nimbl. CD19+ |
|--------------|-------------|------------|--------------|---------------|-------------|-------------|---------------|----------------|--------------|
| 83965        | Enpp5       | 13         | 15           | 42            | 86          | 8           | 7             | 26             | 46           |
| 83993        | Tbx19       | 8          | 8            | 31            | 16          | 6           | 10            | 23             | 15           |
| 83995        | Mmp1a       | 4          | 7            | 20            | 16          | 4           | 8             | 24             | 22           |
| 83997        | Slmap       | 95         | 292          | 562           | 2251        | 101         | 256           | 654            | 2144         |
| 84004        | Mcam        | 15         | 3            | 35            | 57          | 15          | 15            | 38             | 35           |
| 84036        | Kcnn1       | 9          | 18           | 28            | 50          | 9           | 17            | 29             | 176          |
| 84092        | Usp8        | 105        | 97           | 294           | 1123        | 126         | 136           | 355            | 1296         |
| 84094        | Plvap       | 7          | 75           | 22            | 63          | 6           | 59            | 26             | 54           |
| 84095        | Pi4k2a      | 71         | 462          | 448           | 1495        | 66          | 488           | 395            | 1500         |
| 84111        | Gpr87       | 4          | 3            | 24            | 52          | 4           | 3             | 28             | 65           |
| 84112        | Sucnr1      | 5          | 2            | 33            | 20          | 5           | 3             | 30             | 17           |
| 84113        | Ptov1       | 46         | 105          | 85            | 604         | 40          | 54            | 47             | 513          |
| 84505        | Setdb1      | 75         | 111          | 122           | 2116        | 71          | 118           | 109            | 1641         |
| 84543        | Sval2       | 4          | 9            | 34            | 18          | 4           | 11            | 31             | 17           |
| 84544        | Cd96        | 274        | 730          | 560           | 6228        | 7           | 13            | 27             | 55           |
| 84585        | Rnf123      | 165        | 541          | 128           | 239         | 161         | 448           | 104            | 175          |
| 84652        | Drctnbn1a   | 42         | 194          | 367           | 731         | 94          | 313           | 706            | 950          |
| 84653        | Hes7        | 28         | 7            | 33            | 44          | 26          | 3             | 31             | 44           |
| 84682        | Cox4i2      | 16         | 8            | 41            | 161         | 16          | 5             | 39             | 94           |
| 85030        | Tnfrsf25    | 47         | 2453         | 1230          | 264         | 15          | 76            | 34             | 227          |
| 85031        | Pla1a       | 6          | 5            | 22            | 50          | 5           | 13            | 25             | 68           |
| 85305        | Kars        | 73         | 556          | 589           | 7404        | 80          | 547           | 598            | 7037         |
| 93670        | Tac4        | 12         | 2            | 28            | 64          | 10          | 7             | 26             | 113          |
| 93671        | Cd163       | 5          | 3            | 22            | 225         | 5           | 3             | 24             | 284          |
| 93672        | Il24        | 6          | 22           | 31            | 17          | 15          | 25            | 28             | 20           |
| 93674        | Cml3        | 4          | 3            | 23            | 40          | 5           | 3             | 22             | 39           |
| 93677        | Lmod2       | 9          | 2            | 24            | 30          | 8           | 3             | 22             | 27           |
| 93679        | Trim8       | 86         | 1909         | 3183          | 146         | 77          | 1830          | 2734           | 129          |
| 93683        | Glce        | 18         | 145          | 104           | 1095        | 18          | 208           | 127            | 1013         |
| 93684        | 15-Sep      | 319        | 1738         | 436           | 7565        | 316         | 1356          | 407            | 5839         |
| 93685        | Entpd7      | 13         | 15           | 259           | 49          | 17          | 33            | 531            | 24           |
| 93686        | Rbm9        | 8          | 5            | 38            | 41          | 8           | 7             | 38             | 33           |
| 93687        | Csnk1a1     | 468        | 1649         | 23            | 5122        | 352         | 1091          | 23             | 3121         |
| 93688        | Klhl1       | 6          | 26           | 20            | 18          | 6           | 23            | 17             | 26           |
| 93689        | Lmod1       | 8          | 14           | 32            | 62          | 9           | 12            | 26             | 36           |
| 93690        | Gpr45       | 7          | 3            | 23            | 20          | 8           | 5             | 27             | 21           |
| 93691        | Klf7        | 139        | 529          | 837           | 2072        | 85          | 326           | 486            | 616          |
| 93695        | Gpnmb       | 8          | 4            | 51            | 150         | 6           | 3             | 25             | 57           |
| 93696        | Chrac1      | 24         | 427          | 20            | 2835        | 25          | 437           | 23             | 2986         |
| 93697        | Narg2       | 45         | 98           | 33            | 492         | 56          | 118           | 38             | 541          |
| 93719        | Ear6        | 6          | 3            | 27            | 24          | 7           | 3             | 28             | 33           |
| 93721        | Cpn1        | 5          | 10           | 28            | 74          | 5           | 7             | 29             | 77           |
| 93725        | Ear10       | 5          | 2            | 28            | 15          | 5           | 3             | 37             | 65           |
| 93726        | Ear11       | 4          | 27           | 23            | 40          | 5           | 328           | 23             | 41           |
| 93728        | Pabpc5      | 7          | 2            | 28            | 87          | 7           | 3             | 30             | 55           |
| 93730        | Lztfl1      | 149        | 243          | 49            | 1091        | 150         | 260           | 44             | 1007         |
| 93732        | Acox2       | 7          | 4            | 35            | 28          | 6           | 4             | 39             | 24           |
| 93734        | Mpv17l      | 10         | 3            | 43            | 37          | 9           | 3             | 45             | 74           |
| 93735        | Wnt16       | 11         | 4            | 21            | 49          | 11          | 7             | 25             | 111          |
| 93737        | Pard6g      | 9          | 61           | 193           | 884         | 7           | 29            | 77             | 561          |
| 93739        | Gabarapl2   | 176        | 670          | 49            | 14401       | 146         | 670           | 39             | 12271        |

| NCBI<br>Gene ID | Gene<br>Symbol | Affy.<br>CD4+ | Agilent<br>CD4+ | Illumina<br>CD4+ | Nimbl.<br>CD4+ | Affy.<br>CD19+ | Agilent<br>CD19+ | Illumina<br>CD19+ | Nimbl.<br>CD19+ |
|-----------------|----------------|---------------|-----------------|------------------|----------------|----------------|------------------|-------------------|-----------------|
| 93742           | Pard3          | 8             | 4               | 35               | 70             | 7              | 4                | 35                | 79              |
| 93746           | Gprc5d         | 5             | 44              | 36               | 19             | 5              | 59               | 30                | 21              |
| 93747           | Echs1          | 40            | 526             | 186              | 765            | 35             | 460              | 157               | 536             |
| 93757           | Immp2l         | 11            | 51              | 64               | 253            | 23             | 306              | 220               | 1642            |
| 93759           | Sirt1          | 126           | 417             | 191              | 690            | 135            | 678              | 219               | 704             |
| 93760           | Arid1a         | 559           | 2682            | 3814             | 1530           | 485            | 1441             | 2925              | 1104            |
| 93761           | Smarca1        | 4             | 10              | 35               | 55             | 4              | 17               | 30                | 111             |
| 93762           | Smarca5        | 184           | 109             | 85               | 8306           | 190            | 122              | 104               | 8644            |
| 93765           | Ube2n          | 92            | 115             | 229              | 1362           | 104            | 123              | 236               | 1001            |
| 93834           | Peli2          | 8             | 39              | 43               | 40             | 7              | 26               | 42                | 42              |
| 93835           | Amn            | 38            | 18              | 67               | 52             | 37             | 37               | 91                | 70              |
| 93836           | Rnf111         | 142           | 506             | 50               | 7349           | 184            | 506              | 50                | 7930            |
| 93837           | Dach2          | 5             | 3               | 25               | 27             | 5              | 3                | 30                | 32              |
| 93838           | Dqx1           | 20            | 8               | 29               | 67             | 12             | 7                | 25                | 28              |
| 93841           | Uchl4          | 11            | 386             | 20               | 1322           | 16             | 506              | 22                | 1853            |
| 93842           | Igsf9          | 14            | 4               | 23               | 44             | 19             | 39               | 29                | 163             |
| 93843           | Pnck           | 13            | 11              | 25               | 48             | 13             | 7                | 23                | 31              |
| 93872           | Pcdhb1         | 5             | 2               | 30               | 32             | 5              | 3                | 21                | 20              |
| 93873           | Pcdhb2         | 6             | 2               | 26               | 17             | 6              | 3                | 29                | 18              |
| 93874           | Pcdhb3         | 5             | 8               | 29               | 18             | 5              | 5                | 33                | 17              |
| 93875           | Pcdhb4         | 6             | 48              | 29               | 32             | 6              | 17               | 24                | 45              |
| 93876           | Pcdhb5         | 5             | 36              | 19               | 152            | 5              | 22               | 22                | 129             |
| 93877           | Pcdhb6         | 6             | 4               | 26               | 21             | 7              | 4                | 25                | 26              |
| 93878           | Pcdhb7         | 5             | 8               | 19               | 54             | 5              | 8                | 21                | 76              |
| 93879           | Pcdhb8         | 7             | 11              | 36               | 71             | 6              | 11               | 32                | 84              |
| 93880           | Pcdhb9         | 4             | 2               | 29               | 21             | 4              | 4                | 31                | 17              |
| 93881           | Pcdhb10        | 4             | 6               | 25               | 22             | 4              | 5                | 28                | 21              |
| 93882           | Pcdhb11        | 13            | 2               | 24               | 14             | 15             | 3                | 25                | 14              |
| 93883           | Pcdhb12        | 4             | 3               | 25               | 24             | 4              | 6                | 23                | 39              |
| 93884           | Pcdhb13        | 6             | 4               | 28               | 43             | 5              | 3                | 29                | 35              |
| 93885           | Pcdhb14        | 4             | 6               | 26               | 19             | 4              | 7                | 27                | 25              |
| 93886           | Pcdhb15        | 11            | 5               | 20               | 23             | 11             | 3                | 24                | 29              |
| 93887           | Pcdhb16        | 5             | 13              | 22               | 21             | 5              | 12               | 25                | 21              |
| 93888           | Pcdhb17        | 4             | 10              | 22               | 28             | 4              | 13               | 21                | 31              |
| 93889           | Pcdhb18        | 4             | 57              | 21               | 14             | 4              | 31               | 19                | 16              |
| 93890           | Pcdhb19        | 4             | 3               | 22               | 13             | 4              | 3                | 23                | 16              |
| 93891           | Pcdhb20        | 4             | 3               | 29               | 31             | 4              | 3                | 28                | 37              |
| 93892           | Pcdhb21        | 4             | 7               | 24               | 16             | 4              | 11               | 20                | 16              |
| 93893           | Pcdhb22        | 6             | 3               | 18               | 90             | 6              | 4                | 26                | 96              |
| 93897           | Fzd10          | 9             | 14              | 28               | 73             | 9              | 11               | 33                | 60              |
| 93960           | Nkd1           | 13            | 4               | 30               | 51             | 12             | 5                | 24                | 44              |
| 93961           | B3galt5        | 5             | 5               | 32               | 25             | 5              | 4                | 31                | 28              |
| 93966           | Hemgn          | 7             | 3               | 25               | 16             | 7              | 13               | 24                | 57              |
| 94040           | Clmn           | 4             | 9               | 43               | 62             | 4              | 13               | 43                | 88              |
| 94041           | Allc           | 5             | 4               | 22               | 24             | 5              | 4                | 22                | 24              |
| 94044           | Bcl2l13        | 74            | 411             | 215              | 2620           | 68             | 301              | 198               | 2152            |
| 94045           | P2rx5          | 12            | 2               | 26               | 21             | 15             | 3                | 24                | 20              |
| 94047           | Cecr6          | 28            | 3               | 26               | 49             | 24             | 3                | 28                | 46              |
| 94061           | Mrpl1          | 45            | 154             | 494              | 449            | 42             | 161              | 512               | 292             |
| 94062           | Mrpl3          | 96            | 1222            | 746              | 2245           | 104            | 1404             | 754               | 2354            |
| 94063           | Mrpl16         | 44            | 431             | 410              | 12485          | 53             | 568              | 482               | 15163           |

| NCBI Gene ID | Gene Symbol | Affy. CD4+ | Agilent CD4+ | Illumina CD4+ | Nimbl. CD4+ | Affy. CD19+ | Agilent CD19+ | Illumina CD19+ | Nimbl. CD19+ |
|--------------|-------------|------------|--------------|---------------|-------------|-------------|---------------|----------------|--------------|
| 94065        | Mrpl34      | 41         | 569          | 459           | 2423        | 40          | 693           | 444            | 2564         |
| 94066        | Mrpl36      | 42         | 671          | 316           | 2303        | 54          | 874           | 373            | 3013         |
| 94067        | Mrpl43      | 40         | 1907         | 917           | 5809        | 50          | 3094          | 1101           | 8558         |
| 94088        | Trim6       | 7          | 5            | 33            | 35          | 6           | 19            | 34             | 54           |
| 94089        | Trim7       | 10         | 17           | 25            | 37          | 71          | 56            | 80             | 1021         |
| 94090        | Trim9       | 5          | 30           | 33            | 77          | 5           | 27            | 33             | 67           |
| 94091        | Trim11      | 85         | 779          | 701           | 9240        | 98          | 1149          | 822            | 9146         |
| 94092        | Trim16      | 13         | 13           | 36            | 146         | 12          | 24            | 43             | 218          |
| 94093        | Trim33      | 146        | 1167         | 174           | 2034        | 138         | 912           | 165            | 1886         |
| 94094        | Trim34      | 53         | 187          | 225           | 3066        | 122         | 587           | 588            | 7082         |
| 94109        | Csmd1       | 8          | 2            | 48            | 26          | 8           | 4             | 51             | 27           |
| 94111        | Mepe        | 4          | 38           | 27            | 20          | 4           | 34            | 21             | 24           |
| 94118        | Kifc5c      | 31         | 21           | 33            | 367         | 25          | 19            | 26             | 86           |
| 94175        | Hrg         | 5          | 48           | 24            | 33          | 5           | 36            | 25             | 40           |
| 94176        | Dock2       | 672        | 935          | 1501          | 897         | 610         | 861           | 1297           | 583          |
| 94178        | Mcoln1      | 108        | 1085         | 70            | 1761        | 111         | 878           | 55             | 1352         |
| 94181        | Nans        | 107        | 182          | 467           | 2310        | 90          | 145           | 343            | 1659         |
| 94185        | Tnfrsf21    | 10         | 7            | 36            | 45          | 10          | 6             | 38             | 88           |
| 94186        | Strn3       | 103        | 1206         | 121           | 531         | 95          | 1202          | 85             | 328          |
| 94187        | Zfp423      | 19         | 16           | 27            | 31          | 17          | 14            | 25             | 31           |
| 94190        | Ophn1       | 5          | 3            | 30            | 85          | 5           | 3             | 35             | 88           |
| 94191        | Adarb2      | 5          | 5            | 22            | 24          | 5           | 5             | 28             | 26           |
| 94192        | C1galt1     | 189        | 303          | 102           | 824         | 332         | 358           | 151            | 1237         |
| 94213        | Ddx50       | 153        | 477          | 765           | 8619        | 130         | 471           | 656            | 7105         |
| 94214        | Spock2      | 17         | 22           | 26            | 81          | 14          | 25            | 23             | 74           |
| 94216        | Col4a6      | 7          | 114          | 29            | 44          | 9           | 120           | 28             | 61           |
| 94217        | Lrp1b       | 5          | 3            | 37            | 32          | 5           | 4             | 35             | 42           |
| 94218        | Cnnm3       | 54         | 36           | 44            | 2139        | 51          | 30            | 44             | 1049         |
| 94219        | Cnnm2       | 29         | 14           | 78            | 146         | 18          | 5             | 46             | 78           |
| 94220        | Cnnm4       | 37         | 158          | 17            | 27          | 39          | 192           | 20             | 26           |
| 94221        | Gopc        | 72         | 287          | 68            | 2329        | 119         | 484           | 118            | 3014         |
| 94222        | Olig3       | 5          | 20           | 26            | 20          | 5           | 22            | 24             | 26           |
| 94223        | Dgcr8       | 114        | 63           | 162           | 811         | 97          | 42            | 133            | 719          |
| 94224        | Srd5a2      | 8          | 4            | 27            | 41          | 9           | 3             | 24             | 32           |
| 94226        | Edg8        | 10         | 2            | 27            | 39          | 10          | 3             | 29             | 51           |
| 94227        | Pi15        | 5          | 2            | 25            | 31          | 4           | 3             | 25             | 52           |
| 94229        | Slc4a10     | 6          | 4            | 21            | 56          | 6           | 3             | 24             | 83           |
| 94230        | Cpsf1       | 87         | 603          | 2362          | 837         | 80          | 565           | 1951           | 634          |
| 94244        | Fkbp6       | 8          | 10           | 25            | 144         | 7           | 9             | 25             | 119          |
| 94245        | Dtnbp1      | 44         | 474          | 472           | 599         | 60          | 805           | 661            | 1043         |
| 94246        | Arid4b      | 119        | 465          | 335           | 9273        | 134         | 380           | 295            | 8446         |
| 94249        | Slc24a3     | 6          | 9            | 30            | 16          | 5           | 6             | 31             | 15           |
| 94254        | Wbscr16     | 61         | 141          | 192           | 788         | 68          | 162           | 185            | 677          |
| 94275        | Maged1      | 7          | 29           | 53            | 63          | 7           | 28            | 40             | 72           |
| 94279        | Sfxn2       | 19         | 81           | 71            | 964         | 19          | 53            | 65             | 890          |
| 94280        | Sfxn3       | 99         | 677          | 1199          | 38          | 87          | 406           | 755            | 34           |
| 94281        | Sfxn4       | 10         | 65           | 74            | 52          | 17          | 48            | 154            | 77           |
| 94282        | Sfxn5       | 17         | 7            | 37            | 326         | 28          | 40            | 38             | 1041         |
| 94315        | Prcc        | 116        | 936          | 663           | 106         | 106         | 1190          | 552            | 107          |
| 94352        | Loxl2       | 12         | 17           | 37            | 42          | 15          | 21            | 35             | 48           |
| 94353        | Hmgcn3      | 5          | 8            | 62            | 95          | 7           | 139           | 442            | 322          |

| NCBI Gene ID | Gene Symbol | Affy. CD4+ | Agilent CD4+ | Illumina CD4+ | Nimbl. CD4+ | Affy. CD19+ | Agilent CD19+ | Illumina CD19+ | Nimbl. CD19+ |
|--------------|-------------|------------|--------------|---------------|-------------|-------------|---------------|----------------|--------------|
| 96979        | Ptges2      | 15         | 149          | 71            | 167         | 17          | 159           | 78             | 189          |
| 97122        | Hist2h4     | 127        | 502          | 46            | 58          | 138         | 500           | 36             | 80           |
| 97165        | Hmgb2       | 177        | 2051         | 19            | 1065        | 189         | 1692          | 24             | 1202         |
| 97212        | Hadha       | 138        | 165          | 28            | 172         | 177         | 195           | 29             | 160          |
| 97387        | Strn4       | 106        | 729          | 68            | 263         | 98          | 1055          | 93             | 512          |
| 97440        | C76566      | 13         | 9            | 73            | 146         | 14          | 3             | 59             | 44           |
| 97484        | Cog8        | 134        | 276          | 836           | 3894        | 145         | 269           | 937            | 4790         |
| 97541        | Qars        | 117        | 1971         | 28            | 4028        | 120         | 1966          | 32             | 3281         |
| 97761        | Rutbc1      | 19         | 77           | 38            | 169         | 18          | 62            | 30             | 197          |
| 97775        | 330048n14r  | 19         | 13           | 94            | 59          | 18          | 25            | 162            | 105          |
| 97848        | Serpinb6c   | 5          | 5            | 38            | 33          | 5           | 3             | 34             | 35           |
| 97863        | C78339      | 104        | 307          | 972           | 400         | 72          | 196           | 737            | 136          |
| 97998        | Depdc6      | 11         | 34           | 56            | 60          | 11          | 33            | 59             | 61           |
| 98053        | Gtf2f1      | 73         | 2039         | 180           | 1212        | 73          | 2559          | 177            | 1360         |
| 98193        | Wdr42a      | 141        | 1136         | 372           | 1466        | 147         | 1388          | 326            | 1290         |
| 98256        | Kmo         | 5          | 3            | 20            | 20          | 329         | 129           | 318            | 2171         |
| 98258        | Txndc9      | 79         | 685          | 65            | 12608       | 77          | 516           | 60             | 10657        |
| 98267        | Stk17b      | 938        | 3560         | 2217          | 9893        | 1181        | 3313          | 2793           | 10691        |
| 98363        | Efhd1       | 7          | 48           | 28            | 134         | 5           | 43            | 29             | 94           |
| 98365        | Slamf9      | 11         | 2            | 24            | 33          | 23          | 96            | 119            | 134          |
| 98366        | Smap1       | 118        | 1305         | 492           | 1590        | 86          | 846           | 345            | 1255         |
| 98386        | Lbr         | 602        | 2808         | 4526          | 15861       | 541         | 2190          | 3888           | 10434        |
| 98388        | Chst10      | 65         | 372          | 338           | 487         | 52          | 233           | 181            | 249          |
| 98396        | Slc41a1     | 62         | 70           | 30            | 1305        | 57          | 49            | 22             | 811          |
| 98402        | Sh3bp4      | 11         | 8            | 26            | 44          | 11          | 3             | 26             | 27           |
| 98403        | Zfp451      | 102        | 341          | 338           | 3756        | 81          | 285           | 301            | 4905         |
| 98404        | Ai597479    | 45         | 249          | 360           | 2049        | 43          | 258           | 371            | 1708         |
| 98488        | Gtf3c3      | 77         | 139          | 149           | 235         | 41          | 90            | 110            | 133          |
| 98660        | Atp1a2      | 14         | 4            | 26            | 34          | 14          | 4             | 26             | 32           |
| 98685        | 190005f20r  | 104        | 115          | 1784          | 2269        | 114         | 119           | 1929           | 3052         |
| 98710        | Rabif       | 90         | 115          | 262           | 1096        | 80          | 92            | 214            | 866          |
| 98711        | Rdh10       | 59         | 64           | 102           | 791         | 60          | 46            | 87             | 893          |
| 98758        | Hnrpf       | 1674       | 17376        | 24            | 21420       | 1432        | 13950         | 22             | 17228        |
| 98845        | Eps8l2      | 13         | 10           | 24            | 24          | 11          | 10            | 22             | 20           |
| 98870        | Ai182371    | 5          | 16           | 22            | 41          | 5           | 15            | 24             | 37           |
| 98878        | Ehd4        | 11         | 175          | 145           | 440         | 76          | 1304          | 1059           | 2222         |
| 98910        | Usp6nl      | 45         | 24           | 154           | 315         | 160         | 62            | 564            | 1332         |
| 98932        | Myl9        | 8          | 14           | 30            | 65          | 8           | 14            | 29             | 87           |
| 98952        | 230093n12r  | 364        | 1829         | 5116          | 2606        | 105         | 449           | 1456           | 731          |
| 98970        | Fibcd1      | 16         | 3            | 56            | 156         | 15          | 3             | 35             | 107          |
| 99011        | Pomt1       | 25         | 33           | 35            | 69          | 29          | 42            | 34             | 76           |
| 99031        | Osbpl6      | 5          | 2            | 33            | 34          | 5           | 3             | 25             | 47           |
| 99045        | Mrps26      | 79         | 1604         | 121           | 1449        | 61          | 1303          | 87             | 1332         |
| 99138        | Stard7      | 91         | 555          | 319           | 403         | 96          | 593           | 349            | 297          |
| 99151        | Ceecam1     | 7          | 16           | 37            | 56          | 6           | 19            | 34             | 54           |
| 99152        | Anapc2      | 118        | 421          | 769           | 433         | 120         | 487           | 763            | 503          |
| 99167        | Ssx2ip      | 21         | 47           | 23            | 237         | 17          | 40            | 22             | 230          |
| 99237        | Tm9sf4      | 65         | 128          | 165           | 505         | 68          | 150           | 163            | 483          |
| 99296        | Hrh3        | 8          | 36           | 28            | 34          | 8           | 35            | 27             | 32           |
| 99326        | Garnl3      | 10         | 12           | 26            | 36          | 10          | 8             | 28             | 44           |
| 99371        | Arfgef2     | 110        | 95           | 137           | 58          | 184         | 121           | 193            | 86           |



| NCBI<br>Gene ID | Gene<br>Symbol | Affy.<br>CD4+ | Agilent<br>CD4+ | Illumina<br>CD4+ | Nimbl.<br>CD4+ | Affy.<br>CD19+ | Agilent<br>CD19+ | Illumina<br>CD19+ | Nimbl.<br>CD19+ |
|-----------------|----------------|---------------|-----------------|------------------|----------------|----------------|------------------|-------------------|-----------------|
| 99375           | Cul4a          | 50            | 240             | 30               | 395            | 52             | 248              | 28                | 434             |
| 99377           | Sall4          | 8             | 166             | 42               | 87             | 8              | 171              | 39                | 130             |
| 99412           | Golga2         | 49            | 1861            | 1055             | 1255           | 59             | 2023             | 1046              | 1287            |
| 99439           | Duox1          | 5             | 23              | 33               | 31             | 5              | 24               | 34                | 21              |
| 99526           | Usp53          | 111           | 143             | 132              | 366            | 73             | 106              | 93                | 159             |
| 99543           | Olfml3         | 66            | 30              | 28               | 31             | 31             | 25               | 22                | 27              |
| 99571           | Fgg            | 4             | 5               | 21               | 26             | 4              | 9                | 22                | 24              |
| 99586           | Dpyd           | 5             | 8               | 23               | 28             | 5              | 7                | 23                | 35              |
| 99633           | Lphn2          | 11            | 8               | 24               | 19             | 15             | 17               | 23                | 31              |
| 99662           | Eps8l3         | 12            | 17              | 21               | 28             | 14             | 24               | 23                | 62              |
| 99683           | Sec24b         | 258           | 657             | 692              | 2961           | 228            | 503              | 513               | 2238            |
| 99696           | Ankrd50        | 58            | 13              | 151              | 216            | 36             | 3                | 85                | 113             |
| 99709           | Ai747448       | 6             | 2               | 24               | 18             | 5              | 4                | 23                | 19              |
| 99712           | Cept1          | 191           | 764             | 941              | 11229          | 193            | 624              | 1047              | 9851            |
| 99730           | Taf13          | 62            | 379             | 174              | 994            | 68             | 406              | 200               | 803             |
| 99738           | Kcnc4          | 10            | 43              | 31               | 35             | 10             | 35               | 28                | 42              |
| 99889           | Arfip1         | 51            | 87              | 431              | 1489           | 42             | 49               | 364               | 1223            |
| 99929           | Tiparp         | 58            | 227             | 18               | 369            | 79             | 290              | 23                | 561             |
| 99982           | Aof2           | 144           | 1226            | 844              | 4375           | 121            | 982              | 636               | 2455            |
| 100012          | Oog3           | 4             | 2               | 26               | 18             | 5              | 7                | 26                | 19              |
| 100019          | Mdn1           | 248           | 37              | 869              | 352            | 211            | 17               | 780               | 302             |
| 100061          | Lrrc19         | 4             | 3               | 21               | 22             | 7              | 4                | 20                | 15              |
| 100066          | Cyp2j11        | 4             | 3               | 25               | 22             | 4              | 4                | 23                | 30              |
| 100072          | Camta1         | 193           | 2               | 235              | 20             | 185            | 3                | 298               | 29              |
| 100102          | Pcsk9          | 12            | 17              | 23               | 95             | 12             | 21               | 27                | 81              |
| 100121          | Tdrd7          | 12            | 52              | 22               | 288            | 38             | 396              | 23                | 1642            |
| 100129          | Gpr153         | 7             | 76              | 23               | 47             | 6              | 55               | 25                | 43              |
| 100163          | Pafah2         | 13            | 96              | 71               | 255            | 11             | 46               | 36                | 69              |
| 100169          | Phactr4        | 18            | 288             | 539              | 448            | 22             | 325              | 696               | 605             |
| 100198          | H6pd           | 68            | 426             | 320              | 628            | 37             | 183              | 143               | 239             |
| 100206          | Adprhl2        | 62            | 481             | 39               | 2887           | 65             | 456              | 38                | 3219            |
| 100213          | Rusc2          | 8             | 13              | 33               | 58             | 8              | 16               | 31                | 58              |
| 100226          | Stx12          | 21            | 112             | 154              | 1442           | 18             | 118              | 186               | 1938            |
| 100273          | Osbpl9         | 257           | 1234            | 2770             | 13501          | 266            | 952              | 3015              | 14215           |
| 100317          | Au040320       | 94            | 505             | 841              | 416            | 80             | 453              | 735               | 355             |
| 100336          | Ppp1r8         | 72            | 612             | 348              | 504            | 72             | 440              | 287               | 585             |
| 100340          | Smpdl3b        | 7             | 5               | 53               | 63             | 7              | 3                | 35                | 37              |
| 100342          | 732473b16r     | 40            | 15              | 31               | 103            | 38             | 15               | 28                | 111             |
| 100465          | Mobkl2c        | 49            | 108             | 38               | 2672           | 32             | 50               | 34                | 1621            |
| 100470          | Lao1           | 6             | 3               | 24               | 38             | 6              | 3                | 27                | 63              |
| 100535          | Oas1d          | 5             | 5               | 24               | 21             | 5              | 5                | 22                | 21              |
| 100554          | Aa792892       | 4             | 60              | 30               | 55             | 4              | 71               | 32                | 97              |
| 100561          | Slc15a4        | 67            | 222             | 61               | 587            | 382            | 1733             | 247               | 3368            |
| 100647          | Upk3b          | 10            | 2               | 29               | 20             | 10             | 3                | 28                | 18              |
| 100662          | 330016d06r     | 11            | 101             | 27               | 1063           | 8              | 78               | 29                | 1117            |
| 100678          | Psph           | 23            | 514             | 22               | 648            | 24             | 400              | 19                | 519             |
| 100689          | Spon2          | 7             | 17              | 27               | 89             | 7              | 11               | 29                | 163             |
| 100705          | Acacb          | 11            | 34              | 58               | 64             | 9              | 8                | 33                | 42              |
| 100715          | Papd4          | 185           | 788             | 88               | 2143           | 236            | 829              | 95                | 1802            |
| 100732          | Mapre3         | 14            | 17              | 29               | 37             | 11             | 12               | 24                | 38              |
| 100756          | Usp30          | 36            | 125             | 98               | 1258           | 36             | 159              | 91                | 1455            |

| NCBI Gene ID | Gene Symbol | Affy. CD4+ | Agilent CD4+ | Illumina CD4+ | Nimbl. CD4+ | Affy. CD19+ | Agilent CD19+ | Illumina CD19+ | Nimbl. CD19+ |
|--------------|-------------|------------|--------------|---------------|-------------|-------------|---------------|----------------|--------------|
| 100763       | Ube3c       | 111        | 145          | 546           | 831         | 118         | 155           | 554            | 681          |
| 100952       | Emilin1     | 15         | 17           | 44            | 306         | 14          | 7             | 26             | 99           |
| 100972       | Rab28       | 33         | 182          | 885           | 341         | 54          | 266           | 1377           | 473          |
| 100986       | Akap9       | 99         | 784          | 777           | 1353        | 95          | 678           | 752            | 1130         |
| 101023       | Zfp513      | 73         | 275          | 472           | 375         | 83          | 404           | 689            | 616          |
| 101095       | Zfp282      | 34         | 81           | 302           | 83          | 40          | 145           | 447            | 138          |
| 101197       | Ai894139    | 29         | 91           | 84            | 170         | 29          | 93            | 89             | 158          |
| 101202       | Ai987662    | 5          | 6            | 23            | 24          | 13          | 62            | 22             | 139          |
| 101206       | Tada3l      | 43         | 251          | 504           | 577         | 40          | 196           | 384            | 398          |
| 101320       | Dyrk4       | 5          | 2            | 22            | 58          | 6           | 7             | 31             | 107          |
| 101358       | Fbxl14      | 132        | 2378         | 143           | 222         | 95          | 1311          | 103            | 220          |
| 101401       | Adamts9     | 22         | 25           | 19            | 21          | 22          | 22            | 23             | 23           |
| 101437       | Dhx32       | 46         | 490          | 499           | 2947        | 44          | 514           | 492            | 2266         |
| 101471       | Aa673488    | 118        | 1132         | 643           | 4691        | 87          | 892           | 489            | 4684         |
| 101488       | Slco2b1     | 7          | 2            | 23            | 126         | 6           | 4             | 29             | 88           |
| 101490       | Inpp5f      | 64         | 319          | 605           | 1829        | 113         | 598           | 1175           | 2580         |
| 101502       | Hsd3b7      | 7          | 99           | 209           | 726         | 7           | 76            | 185            | 712          |
| 101513       | 700078k21r  | 49         | 649          | 193           | 150         | 40          | 536           | 140            | 129          |
| 101533       | Klk9        | 8          | 2            | 26            | 32          | 9           | 3             | 29             | 53           |
| 101543       | Wtip        | 19         | 8            | 27            | 20          | 20          | 8             | 27             | 19           |
| 101565       | 330503k22r  | 10         | 33           | 143           | 39          | 12          | 44            | 165            | 51           |
| 101568       | Vrk3        | 88         | 1603         | 899           | 7055        | 76          | 1122          | 706            | 5326         |
| 101592       | Eftud1      | 93         | 57           | 111           | 350         | 82          | 52            | 108            | 331          |
| 101602       | Ai467606    | 219        | 2884         | 3771          | 7222        | 146         | 1291          | 1926           | 3354         |
| 101612       | Grwd1       | 49         | 258          | 115           | 1569        | 50          | 269           | 110            | 1141         |
| 101706       | Numa1       | 366        | 7683         | 208           | 617         | 266         | 6436          | 142            | 472          |
| 101739       | Psip1       | 92         | 1486         | 1582          | 4109        | 55          | 752           | 834            | 2053         |
| 101943       | Sf3b3       | 348        | 850          | 582           | 2396        | 402         | 932           | 649            | 1770         |
| 101985       | Aa960436    | 59         | 62           | 40            | 534         | 57          | 62            | 41             | 533          |
| 102032       | Ai316807    | 53         | 236          | 363           | 1945        | 49          | 174           | 329            | 1650         |
| 102058       | Exoc8       | 47         | 441          | 772           | 3671        | 43          | 416           | 639            | 2709         |
| 102060       | Gadd45gip1  | 38         | 1638         | 63            | 298         | 39          | 1974          | 56             | 439          |
| 102093       | Phkb        | 48         | 30           | 57            | 215         | 66          | 41            | 62             | 310          |
| 102098       | Arhgef18    | 489        | 1721         | 3605          | 4039        | 413         | 1306          | 3105           | 3742         |
| 102103       | Mtus1       | 5          | 3            | 42            | 28          | 5           | 3             | 40             | 28           |
| 102122       | 310065k24r  | 68         | 705          | 832           | 1708        | 66          | 710           | 818            | 1925         |
| 102162       | Taf5l       | 54         | 900          | 319           | 4645        | 50          | 679           | 217            | 4307         |
| 102182       | Ai931714    | 115        | 541          | 33            | 2948        | 99          | 411           | 31             | 2057         |
| 102193       | Zdhhc7      | 46         | 649          | 844           | 2844        | 39          | 490           | 679            | 2658         |
| 102209       | Snpc2       | 34         | 159          | 34            | 237         | 35          | 166           | 38             | 288          |
| 102278       | Cpne7       | 8          | 19           | 26            | 183         | 7           | 34            | 28             | 178          |
| 102294       | Cyp4v3      | 15         | 22           | 73            | 188         | 19          | 45            | 146            | 480          |
| 102334       | Ankrd10     | 109        | 812          | 510           | 1838        | 96          | 697           | 408            | 1325         |
| 102339       | Cog4        | 66         | 421          | 62            | 736         | 74          | 430           | 55             | 716          |
| 102414       | Clk3        | 148        | 5125         | 32            | 4167        | 146         | 5462          | 33             | 3659         |
| 102436       | Lars2       | 42         | 156914       | 160           | 7022        | 34          | 80387         | 142            | 6244         |
| 102448       | Xylb        | 10         | 14           | 26            | 57          | 9           | 12            | 26             | 39           |
| 102570       | Slc22a13    | 29         | 28           | 26            | 41          | 22          | 22            | 22             | 37           |
| 102607       | Snx19       | 74         | 89           | 258           | 846         | 66          | 84            | 209            | 737          |
| 102614       | Rpp25       | 11         | 3            | 22            | 144         | 10          | 3             | 25             | 104          |
| 102626       | Mapkapk3    | 91         | 524          | 338           | 231         | 54          | 259           | 178            | 165          |

| NCBI<br>Gene ID | Gene<br>Symbol | Affy.<br>CD4+ | Agilent<br>CD4+ | Illumina<br>CD4+ | Nimbl.<br>CD4+ | Affy.<br>CD19+ | Agilent<br>CD19+ | Illumina<br>CD19+ | Nimbl.<br>CD19+ |
|-----------------|----------------|---------------|-----------------|------------------|----------------|----------------|------------------|-------------------|-----------------|
| 102680          | Xtrp3s1        | 6             | 3               | 23               | 15             | 5              | 5                | 25                | 23              |
| 102774          | Bbs4           | 12            | 150             | 146              | 575            | 9              | 92               | 116               | 283             |
| 102791          | Tcta           | 27            | 19              | 356              | 512            | 27             | 20               | 382               | 502             |
| 102857          | Slc6a8         | 11            | 9               | 41               | 58             | 11             | 7                | 33                | 53              |
| 102866          | Pls3           | 5             | 5               | 33               | 23             | 5              | 5                | 35                | 27              |
| 102954          | Nudt10         | 5             | 3               | 23               | 16             | 6              | 3                | 24                | 16              |
| 103098          | Slc6a15        | 4             | 2               | 26               | 18             | 5              | 3                | 27                | 21              |
| 103135          | Usp52          | 112           | 152             | 349              | 1525           | 139            | 211              | 433               | 1646            |
| 103140          | Gstt3          | 10            | 13              | 39               | 107            | 11             | 28               | 60                | 249             |
| 103142          | Rdh9           | 5             | 51              | 26               | 446            | 7              | 48               | 26                | 697             |
| 103149          | Upb1           | 7             | 2               | 28               | 114            | 6              | 62               | 32                | 419             |
| 103161          | Apof           | 7             | 2               | 26               | 94             | 9              | 19               | 61                | 147             |
| 103172          | Ndg2           | 29            | 986             | 1085             | 299            | 84             | 4966             | 3974              | 1159            |
| 103236          | Csnk1g2        | 300           | 1984            | 4999             | 8371           | 219            | 1655             | 3855              | 6507            |
| 103468          | Nup107         | 76            | 89              | 199              | 1377           | 80             | 88               | 189               | 1091            |
| 103511          | Bb146404       | 5             | 2               | 34               | 32             | 5              | 3                | 37                | 35              |
| 103534          | Mgat4b         | 13            | 155             | 52               | 124            | 10             | 172              | 40                | 103             |
| 103537          | Mbtd1          | 92            | 537             | 149              | 3356           | 96             | 461              | 123               | 3122            |
| 103554          | Psme4          | 125           | 1455            | 214              | 1778           | 152            | 1377             | 255               | 1328            |
| 103573          | Xpo1           | 197           | 640             | 29               | 5663           | 206            | 536              | 22                | 4423            |
| 103583          | Fbxw11         | 83            | 950             | 31               | 3799           | 79             | 925              | 27                | 3558            |
| 103655          | Sec14l4        | 6             | 5               | 23               | 30             | 6              | 8                | 23                | 44              |
| 103677          | Smg6           | 132           | 234             | 164              | 318            | 138            | 264              | 155               | 185             |
| 103710          | Slc35e4        | 11            | 14              | 26               | 33             | 11             | 24               | 26                | 37              |
| 103712          | 330403k07r     | 15            | 28              | 38               | 94             | 11             | 5                | 25                | 41              |
| 103733          | Tubg1          | 55            | 344             | 299              | 1065           | 54             | 255              | 231               | 1182            |
| 103737          | Pex12          | 24            | 75              | 24               | 1476           | 24             | 68               | 26                | 1447            |
| 103742          | 810046j19r     | 63            | 1419            | 2070             | 10762          | 66             | 1696             | 2128              | 11500           |
| 103765          | Tmem17         | 8             | 4               | 31               | 43             | 9              | 43               | 43                | 209             |
| 103768          | Tubg2          | 11            | 12              | 60               | 82             | 13             | 44               | 175               | 93              |
| 103806          | Maml1          | 91            | 220             | 1578             | 142            | 72             | 137              | 1285              | 112             |
| 103841          | Cuedc1         | 11            | 44              | 30               | 65             | 10             | 42               | 32                | 69              |
| 103844          | Ai842396       | 8             | 2               | 36               | 224            | 9              | 3                | 31                | 187             |
| 103850          | Nt5m           | 25            | 158             | 528              | 813            | 24             | 196              | 552               | 791             |
| 103889          | Hoxb2          | 7             | 3               | 36               | 64             | 7              | 3                | 36                | 92              |
| 103963          | Rpn1           | 64            | 2913            | 28               | 2077           | 70             | 4716             | 29                | 2324            |
| 103967          | Dnm3           | 5             | 2               | 31               | 39             | 5              | 3                | 27                | 22              |
| 103968          | Plin           | 11            | 10              | 22               | 33             | 12             | 11               | 26                | 32              |
| 103978          | Gpc5           | 5             | 8               | 24               | 21             | 5              | 5                | 25                | 27              |
| 103988          | Gck            | 11            | 30              | 26               | 117            | 10             | 36               | 26                | 102             |
| 104001          | Rtn1           | 8             | 15              | 27               | 24             | 8              | 12               | 29                | 73              |
| 104002          | Ctsq           | 4             | 2               | 20               | 48             | 4              | 3                | 19                | 65              |
| 104010          | Cdh22          | 11            | 5               | 20               | 44             | 12             | 6                | 22                | 62              |
| 104069          | Sncb           | 21            | 7               | 26               | 156            | 22             | 9                | 25                | 277             |
| 104079          | Nxph3          | 16            | 26              | 28               | 81             | 14             | 26               | 26                | 100             |
| 104080          | Nxph4          | 7             | 125             | 24               | 136            | 8              | 109              | 19                | 113             |
| 104086          | Cyp27a1        | 10            | 12              | 25               | 26             | 28             | 22               | 127               | 796             |
| 104099          | Itga9          | 12            | 4               | 28               | 25             | 11             | 4                | 28                | 29              |
| 104110          | Adcy4          | 16            | 7               | 27               | 75             | 17             | 8                | 33                | 105             |
| 104111          | Adcy3          | 54            | 25              | 47               | 240            | 35             | 9                | 30                | 161             |
| 104112          | Acly           | 221           | 188             | 2501             | 12513          | 230            | 202              | 2339              | 9954            |

| NCBI Gene ID | Gene Symbol | Affy. CD4+ | Agilent CD4+ | Illumina CD4+ | Nimbl. CD4+ | Affy. CD19+ | Agilent CD19+ | Illumina CD19+ | Nimbl. CD19+ |
|--------------|-------------|------------|--------------|---------------|-------------|-------------|---------------|----------------|--------------|
| 104156       | Etv5        | 9          | 5            | 33            | 238         | 9           | 8             | 36             | 228          |
| 104158       | Ces3        | 6          | 2            | 21            | 18          | 7           | 3             | 26             | 18           |
| 104174       | Gldc        | 6          | 3            | 21            | 41          | 5           | 3             | 25             | 48           |
| 104184       | Blmh        | 83         | 345          | 68            | 3088        | 101         | 552           | 90             | 4361         |
| 104215       | Rhoq        | 6          | 28           | 31            | 113         | 54          | 835           | 33             | 4100         |
| 104245       | Slc6a5      | 6          | 2            | 21            | 24          | 6           | 3             | 23             | 23           |
| 104248       | Cabin1      | 155        | 690          | 33            | 241         | 128         | 731           | 29             | 227          |
| 104252       | Cdc42ep2    | 7          | 323          | 28            | 35          | 7           | 231           | 26             | 36           |
| 104263       | Jmjd1a      | 160        | 623          | 858           | 1956        | 140         | 442           | 771            | 1223         |
| 104271       | Tex15       | 4          | 4            | 24            | 44          | 4           | 7             | 24             | 26           |
| 104303       | Arl1        | 187        | 236          | 703           | 2040        | 178         | 358           | 909            | 2502         |
| 104318       | Csnk1d      | 126        | 2654         | 848           | 4011        | 114         | 1733          | 826            | 3545         |
| 104346       | Gas8        | 10         | 68           | 53            | 331         | 9           | 48            | 42             | 307          |
| 104360       | Isl2        | 7          | 2            | 23            | 80          | 7           | 3             | 24             | 50           |
| 104362       | Meig1       | 4          | 2            | 29            | 22          | 5           | 3             | 33             | 27           |
| 104401       | Pcnxl3      | 128        | 1003         | 27            | 512         | 150         | 944           | 31             | 470          |
| 104416       | Bap1        | 101        | 761          | 348           | 545         | 106         | 931           | 324            | 557          |
| 104418       | Dgkz        | 385        | 1052         | 734           | 145         | 208         | 504           | 374            | 67           |
| 104445       | Cdc42ep1    | 6          | 8            | 47            | 25          | 6           | 7             | 39             | 31           |
| 104458       | Rars        | 162        | 31           | 262           | 3141        | 196         | 32            | 252            | 3300         |
| 104601       | Mycbpap     | 8          | 5            | 31            | 40          | 7           | 8             | 31             | 24           |
| 104681       | Slc16a6     | 31         | 460          | 180           | 502         | 100         | 1774          | 506            | 1445         |
| 104709       | Bb220380    | 16         | 85           | 45            | 48          | 16          | 122           | 47             | 88           |
| 104721       | Ddx1        | 145        | 417          | 481           | 1209        | 171         | 450           | 435            | 1304         |
| 104725       | l10002b05r  | 123        | 679          | 834           | 3476        | 116         | 592           | 669            | 2112         |
| 104771       | 200003c05r  | 58         | 1333         | 921           | 4724        | 59          | 1128          | 855            | 3616         |
| 104776       | Aldh6a1     | 34         | 175          | 304           | 135         | 31          | 114           | 226            | 105          |
| 104799       | Ai413782    | 69         | 347          | 90            | 393         | 93          | 536           | 104            | 438          |
| 104831       | Ptpn23      | 51         | 35           | 136           | 250         | 53          | 36            | 126            | 228          |
| 104836       | Cbll1       | 24         | 150          | 158           | 34          | 26          | 115           | 164            | 27           |
| 104886       | Rab15       | 5          | 16           | 25            | 39          | 6           | 15            | 26             | 34           |
| 104910       | Ai132487    | 21         | 26           | 59            | 142         | 19          | 18            | 38             | 278          |
| 105005       | Aw125753    | 6          | 2            | 27            | 19          | 7           | 3             | 22             | 16           |
| 105014       | Rdh14       | 16         | 341          | 193           | 3034        | 15          | 319           | 199            | 3147         |
| 105083       | Pelo        | 17         | 939          | 232           | 198         | 16          | 711           | 200            | 182          |
| 105148       | Iars        | 170        | 528          | 38            | 1451        | 172         | 580           | 30             | 1187         |
| 105171       | Arrdc3      | 50         | 104          | 228           | 499         | 91          | 189           | 477            | 869          |
| 105193       | Nhlrc1      | 76         | 36           | 47            | 36          | 62          | 5             | 23             | 23           |
| 105239       | Rnf44       | 178        | 450          | 2276          | 1399        | 222         | 354           | 2271           | 1626         |
| 105243       | Slc9a3      | 6          | 3            | 21            | 57          | 7           | 3             | 24             | 40           |
| 105245       | Txndc5      | 60         | 118          | 285           | 400         | 187         | 939           | 1500           | 2345         |
| 105278       | Ccrk        | 16         | 87           | 205           | 81          | 13          | 36            | 93             | 39           |
| 105349       | Akr1c18     | 6          | 7            | 27            | 233         | 4           | 2             | 23             | 68           |
| 105351       | Aw209491    | 27         | 129          | 19            | 355         | 26          | 98            | 19             | 246          |
| 105352       | Dusp22      | 22         | 31           | 59            | 2444        | 73          | 150           | 123            | 10657        |
| 105355       | Slc17a3     | 6          | 3            | 23            | 28          | 6           | 3             | 26             | 19           |
| 105377       | Ankrd32     | 14         | 95           | 23            | 392         | 19          | 153           | 24             | 738          |
| 105440       | Kctd9       | 52         | 87           | 74            | 58          | 64          | 92            | 94             | 66           |
| 105445       | Dock9       | 51         | 302          | 354           | 99          | 51          | 289           | 302            | 67           |
| 105446       | Gmpr2       | 77         | 151          | 35            | 126         | 81          | 134           | 39             | 150          |
| 105450       | Mmrn2       | 7          | 17           | 30            | 75          | 7           | 6             | 30             | 71           |

| NCBI Gene ID | Gene Symbol | Affy. CD4+ | Agilent CD4+ | Illumina CD4+ | Nimbl. CD4+ | Affy. CD19+ | Agilent CD19+ | Illumina CD19+ | Nimbl. CD19+ |
|--------------|-------------|------------|--------------|---------------|-------------|-------------|---------------|----------------|--------------|
| 105501       | Abhd4       | 8          | 134          | 36            | 100         | 9           | 270           | 65             | 146          |
| 105559       | Mbnl2       | 237        | 274          | 574           | 6155        | 224         | 288           | 624            | 5666         |
| 105653       | Phyhip      | 6          | 10           | 17            | 35          | 7           | 6             | 21             | 43           |
| 105663       | Thtpa       | 14         | 119          | 203           | 2594        | 13          | 123           | 225            | 2166         |
| 105675       | Ppif        | 43         | 183          | 28            | 111         | 47          | 127           | 28             | 117          |
| 105689       | Phr1        | 386        | 1661         | 567           | 871         | 380         | 1162          | 544            | 693          |
| 105722       | Tmem16f     | 127        | 437          | 92            | 106         | 112         | 349           | 76             | 84           |
| 105727       | Slc38a1     | 159        | 1098         | 37            | 2042        | 230         | 1271          | 39             | 2628         |
| 105732       | Aa409316    | 6          | 9            | 34            | 19          | 6           | 10            | 31             | 24           |
| 105734       | Tigd5       | 9          | 7            | 27            | 124         | 9           | 4             | 30             | 183          |
| 105782       | Scrib       | 96         | 2063         | 41            | 2722        | 95          | 1760          | 44             | 3419         |
| 105785       | Kdelr3      | 6          | 5            | 32            | 42          | 6           | 3             | 28             | 36           |
| 105787       | Prkaa1      | 128        | 316          | 57            | 677         | 111         | 293           | 49             | 545          |
| 105835       | Rutbc3      | 30         | 30           | 125           | 107         | 24          | 34            | 163            | 140          |
| 105837       | Mtbp        | 25         | 265          | 78            | 1231        | 39          | 457           | 114            | 1864         |
| 105844       | Card10      | 20         | 43           | 33            | 34          | 17          | 42            | 30             | 40           |
| 105853       | Mal2        | 4          | 2            | 29            | 21          | 5           | 3             | 19             | 40           |
| 105988       | Espl1       | 11         | 5            | 28            | 26          | 13          | 15            | 27             | 46           |
| 106014       | Aw049604    | 12         | 4            | 29            | 35          | 13          | 7             | 27             | 50           |
| 106021       | Topors      | 38         | 408          | 371           | 1349        | 38          | 469           | 401            | 1347         |
| 106039       | Gga1        | 80         | 173          | 126           | 52          | 70          | 156           | 85             | 54           |
| 106042       | Prickle1    | 14         | 155          | 193           | 1441        | 11          | 9             | 35             | 283          |
| 106052       | Fbxo4       | 28         | 480          | 270           | 752         | 46          | 1311          | 511            | 1207         |
| 106064       | Aw549877    | 125        | 350          | 956           | 3292        | 163         | 398           | 1211           | 3110         |
| 106143       | Cggbp1      | 105        | 127          | 1801          | 1979        | 112         | 87            | 1902           | 1653         |
| 106248       | Qtrtd1      | 40         | 57           | 128           | 316         | 38          | 36            | 121            | 238          |
| 106264       | 510012g03r  | 48         | 683          | 1398          | 1451        | 49          | 675           | 1312           | 1393         |
| 106298       | Rrn3        | 96         | 398          | 227           | 4577        | 87          | 366           | 213            | 4194         |
| 106326       | Osbp11      | 85         | 151          | 188           | 1557        | 78          | 103           | 135            | 1077         |
| 106338       | Nsun3       | 41         | 80           | 43            | 67          | 43          | 76            | 48             | 48           |
| 106344       | Rfc4        | 39         | 199          | 252           | 789         | 57          | 297           | 414            | 1001         |
| 106369       | Ypel1       | 18         | 23           | 28            | 53          | 18          | 13            | 30             | 52           |
| 106389       | Eaf2        | 6          | 4            | 24            | 19          | 9           | 262           | 36             | 217          |
| 106504       | Stk38       | 267        | 1297         | 29            | 3724        | 109         | 347           | 25             | 1443         |
| 106512       | Gpsm3       | 186        | 1988         | 191           | 3548        | 115         | 1061          | 106            | 3661         |
| 106522       | Aw548124    | 8          | 3            | 30            | 29          | 9           | 3             | 24             | 25           |
| 106529       | Gpsn2       | 549        | 589          | 1012          | 9142        | 476         | 456           | 828            | 7571         |
| 106557       | Ldhal6b     | 16         | 42           | 42            | 32          | 15          | 27            | 37             | 32           |
| 106582       | Nrm         | 30         | 183          | 734           | 2439        | 115         | 579           | 2653           | 7164         |
| 106628       | Trip10      | 25         | 73           | 39            | 56          | 24          | 160           | 47             | 87           |
| 106639       | Ai662250    | 60         | 83           | 202           | 131         | 55          | 87            | 198            | 101          |
| 106648       | Cyp4f15     | 5          | 2            | 19            | 628         | 6           | 3             | 24             | 731          |
| 106672       | Ai413582    | 48         | 397          | 27            | 2856        | 45          | 326           | 28             | 2525         |
| 106722       | Au023871    | 6          | 3            | 40            | 30          | 6           | 4             | 38             | 25           |
| 106766       | Aw049765    | 9          | 37           | 40            | 226         | 8           | 30            | 34             | 332          |
| 106795       | Tcf19       | 26         | 393          | 202           | 209         | 23          | 321           | 150            | 180          |
| 106821       | Ai314976    | 51         | 923          | 28            | 396         | 68          | 1479          | 25             | 482          |
| 106861       | Abhd3       | 9          | 6            | 25            | 25          | 8           | 6             | 21             | 37           |
| 106869       | Tnfaip8     | 142        | 414          | 642           | 11331       | 260         | 684           | 1293           | 16092        |
| 106878       | 10002n04r   | 10         | 5            | 21            | 216         | 19          | 87            | 31             | 565          |
| 106894       | 630042l21r  | 82         | 454          | 660           | 2205        | 70          | 363           | 471            | 1463         |

| NCBI Gene ID | Gene Symbol | Affy. CD4+ | Agilent CD4+ | Illumina CD4+ | Nimbl. CD4+ | Affy. CD19+ | Agilent CD19+ | Illumina CD19+ | Nimbl. CD19+ |
|--------------|-------------|------------|--------------|---------------|-------------|-------------|---------------|----------------|--------------|
| 106931       | Kctd1       | 18         | 73           | 87            | 1079        | 18          | 110           | 104            | 2182         |
| 106947       | Slc39a3     | 41         | 188          | 152           | 514         | 38          | 123           | 99             | 443          |
| 106957       | Slc39a6     | 41         | 345          | 268           | 335         | 39          | 284           | 230            | 226          |
| 107029       | Me2         | 200        | 451          | 349           | 5470        | 110         | 254           | 216            | 2922         |
| 107035       | Fbxo38      | 133        | 1209         | 405           | 430         | 132         | 1278          | 389            | 338          |
| 107045       | Lars        | 88         | 1479         | 1349          | 2102        | 90          | 1582          | 1644           | 1921         |
| 107047       | Tnfsf5ip1   | 48         | 599          | 506           | 6504        | 42          | 540           | 495            | 5346         |
| 107065       | Lrrtm2      | 6          | 3            | 25            | 22          | 6           | 3             | 25             | 22           |
| 107146       | Glyat       | 4          | 5            | 39            | 26          | 4           | 6             | 32             | 47           |
| 107221       | Gpr120      | 6          | 5            | 35            | 19          | 6           | 4             | 39             | 20           |
| 107242       | Ai837181    | 203        | 446          | 1242          | 1284        | 195         | 390           | 1064           | 742          |
| 107250       | Kazald1     | 6          | 16           | 28            | 68          | 6           | 19            | 26             | 60           |
| 107260       | Otub1       | 79         | 247          | 150           | 355         | 81          | 345           | 147            | 273          |
| 107271       | Yars        | 62         | 272          | 35            | 1827        | 48          | 272           | 35             | 1274         |
| 107272       | Psat1       | 32         | 221          | 307           | 940         | 32          | 252           | 319            | 694          |
| 107321       | Lpxn        | 59         | 596          | 478           | 519         | 222         | 3068          | 1955           | 2289         |
| 107338       | Gbf1        | 139        | 145          | 37            | 890         | 138         | 141           | 39             | 1357         |
| 107392       | Brms1       | 45         | 346          | 1061          | 2890        | 46          | 485           | 1161           | 2770         |
| 107435       | Hat1        | 105        | 141          | 934           | 1842        | 132         | 187           | 1199           | 1858         |
| 107448       | Unc5a       | 11         | 50           | 36            | 28          | 10          | 22            | 41             | 28           |
| 107449       | Unc5b       | 7          | 2            | 38            | 52          | 7           | 3             | 40             | 40           |
| 107459       | Gt4-1       | 55         | 10           | 30            | 45          | 56          | 23            | 30             | 40           |
| 107476       | Acaca       | 55         | 31           | 73            | 29          | 65          | 31            | 85             | 28           |
| 107477       | Guca1b      | 41         | 465          | 88            | 1555        | 29          | 393           | 60             | 1034         |
| 107503       | Atf5        | 31         | 97           | 50            | 212         | 28          | 135           | 46             | 258          |
| 107508       | Eprs        | 132        | 390          | 25            | 846         | 137         | 441           | 19             | 723          |
| 107513       | Ssr1        | 91         | 582          | 91            | 8523        | 102         | 628           | 125            | 8552         |
| 107522       | Ece2        | 28         | 11           | 25            | 36          | 23          | 10            | 29             | 42           |
| 107527       | Il1rl2      | 35         | 184          | 201           | 52          | 6           | 16            | 30             | 28           |
| 107528       | Magee1      | 11         | 8            | 154           | 85          | 10          | 3             | 60             | 32           |
| 107566       | Arl2bp      | 315        | 2080         | 418           | 4980        | 219         | 1078          | 230            | 2880         |
| 107569       | Nt5c3       | 40         | 750          | 631           | 1778        | 31          | 550           | 495            | 1539         |
| 107581       | Col16a1     | 22         | 6            | 28            | 16          | 22          | 4             | 26             | 17           |
| 107585       | Dio3        | 6          | 2            | 24            | 47          | 6           | 3             | 24             | 45           |
| 107587       | Osr2        | 10         | 3            | 24            | 21          | 10          | 3             | 25             | 19           |
| 107589       | Mylk        | 9          | 21           | 38            | 50          | 9           | 22            | 35             | 44           |
| 107605       | Rdh1        | 8          | 3            | 32            | 80          | 8           | 3             | 29             | 77           |
| 107652       | Uap1        | 45         | 113          | 242           | 556         | 66          | 205           | 373            | 771          |
| 107684       | Coro2a      | 36         | 41           | 43            | 111         | 79          | 114           | 73             | 315          |
| 107686       | Snrpd2      | 148        | 419          | 2175          | 10934       | 168         | 575           | 2235           | 12945        |
| 107701       | Sf3b4       | 64         | 444          | 1084          | 283         | 68          | 452           | 1100           | 337          |
| 107702       | Rnh1        | 50         | 273          | 1626          | 2010        | 85          | 497           | 3089           | 3915         |
| 107723       | Slc12a6     | 335        | 351          | 638           | 3265        | 768         | 700           | 1377           | 5784         |
| 107732       | Mrpl10      | 94         | 545          | 95            | 995         | 89          | 542           | 81             | 844          |
| 107734       | Mrpl30      | 122        | 834          | 703           | 7955        | 138         | 588           | 712            | 10138        |
| 107746       | Rapgef1     | 164        | 1324         | 3572          | 1165        | 191         | 1510          | 4758           | 1323         |
| 107751       | Prrxl1      | 20         | 24           | 26            | 24          | 22          | 13            | 21             | 33           |
| 107753       | Lgals2      | 6          | 8            | 33            | 103         | 6           | 6             | 31             | 137          |
| 107765       | Ankrd1      | 6          | 6            | 20            | 52          | 7           | 5             | 26             | 68           |
| 107767       | Scamp1      | 8          | 27           | 86            | 164         | 7           | 5             | 34             | 54           |
| 107769       | Tm6sf1      | 46         | 27           | 17            | 334         | 445         | 356           | 21             | 2767         |

| NCBI Gene ID | Gene Symbol | Affy. CD4+ | Agilent CD4+ | Illumina CD4+ | Nimbl. CD4+ | Affy. CD19+ | Agilent CD19+ | Illumina CD19+ | Nimbl. CD19+ |
|--------------|-------------|------------|--------------|---------------|-------------|-------------|---------------|----------------|--------------|
| 107770       | Tm6sf2      | 14         | 224          | 34            | 76          | 12          | 213           | 27             | 42           |
| 107771       | Bmyc        | 65         | 223          | 34            | 123         | 110         | 556           | 46             | 315          |
| 107815       | Scml2       | 5          | 9            | 28            | 42          | 5           | 8             | 28             | 46           |
| 107823       | Whsc1       | 25         | 72           | 152           | 431         | 45          | 145           | 308            | 1133         |
| 107831       | Bai1        | 11         | 35           | 30            | 108         | 12          | 38            | 28             | 117          |
| 107868       | Usp9y       | 4          | 2            | 24            | 32          | 4           | 3             | 22             | 45           |
| 107869       | Cth         | 8          | 2            | 19            | 32          | 10          | 3             | 18             | 74           |
| 107889       | Gcm2        | 6          | 19           | 22            | 39          | 6           | 18            | 24             | 86           |
| 107895       | Mgat5       | 92         | 245          | 32            | 34          | 74          | 190           | 24             | 27           |
| 107932       | Chd4        | 584        | 1230         | 1089          | 1639        | 525         | 1490          | 803            | 1304         |
| 107934       | Celsr3      | 5          | 20           | 30            | 65          | 6           | 14            | 27             | 152          |
| 107939       | Pom121      | 67         | 160          | 299           | 3647        | 72          | 154           | 304            | 3282         |
| 107951       | Cdk9        | 177        | 1454         | 90            | 707         | 249         | 2422          | 124            | 880          |
| 107970       | Hist1h1t    | 6          | 18           | 27            | 77          | 6           | 16            | 28             | 66           |
| 107971       | Frs3        | 35         | 129          | 35            | 92          | 26          | 133           | 27             | 88           |
| 107975       | Pacs1       | 185        | 276          | 869           | 1903        | 111         | 153           | 503            | 992          |
| 107976       | Bre         | 176        | 182          | 246           | 6245        | 226         | 236           | 277            | 6152         |
| 107986       | Ddb2        | 98         | 628          | 807           | 1446        | 61          | 215           | 371            | 453          |
| 107993       | Bfsp2       | 13         | 37           | 32            | 142         | 38          | 1167          | 213            | 3339         |
| 107995       | Cdc20       | 22         | 188          | 63            | 781         | 24          | 303           | 79             | 1184         |
| 108000       | Cenpf       | 6          | 24           | 33            | 23          | 6           | 55            | 30             | 79           |
| 108011       | Ap4e1       | 36         | 207          | 142           | 2707        | 34          | 209           | 124            | 2323         |
| 108012       | Ap1s2       | 25         | 201          | 67            | 5499        | 25          | 232           | 84             | 5223         |
| 108013       | Bruno14     | 7          | 3            | 44            | 67          | 7           | 11            | 47             | 155          |
| 108014       | Sfrs9       | 96         | 1164         | 669           | 4157        | 161         | 2172          | 895            | 5532         |
| 108017       | Fxyd4       | 24         | 6            | 20            | 57          | 21          | 3             | 26             | 48           |
| 108030       | Lin7a       | 7          | 11           | 27            | 20          | 6           | 14            | 32             | 23           |
| 108037       | Shmt2       | 49         | 520          | 125           | 321         | 57          | 579           | 126            | 423          |
| 108043       | Chrn3       | 6          | 14           | 36            | 55          | 6           | 15            | 37             | 53           |
| 108052       | Slc14a1     | 116        | 529          | 416           | 1778        | 137         | 365           | 410            | 1480         |
| 108058       | Camk2d      | 71         | 411          | 420           | 1826        | 191         | 1258          | 1119           | 3848         |
| 108062       | Cstf2       | 111        | 203          | 998           | 2053        | 120         | 222           | 1124           | 1834         |
| 108067       | Eif2b3      | 55         | 5            | 214           | 1892        | 49          | 9             | 190            | 1797         |
| 108069       | Grm3        | 6          | 4            | 25            | 75          | 6           | 4             | 33             | 109          |
| 108071       | Grm5        | 7          | 19           | 29            | 17          | 9           | 15            | 32             | 17           |
| 108072       | Grm6        | 13         | 14           | 61            | 61          | 14          | 13            | 60             | 83           |
| 108073       | Grm7        | 7          | 9            | 30            | 36          | 7           | 5             | 32             | 27           |
| 108075       | Ltbp4       | 12         | 171          | 32            | 50          | 14          | 165           | 29             | 48           |
| 108077       | Skiv2l      | 100        | 318          | 1037          | 251         | 98          | 293           | 801            | 161          |
| 108078       | Olr1        | 6          | 3            | 26            | 21          | 6           | 3             | 24             | 16           |
| 108079       | Prkaa2      | 4          | 8            | 30            | 49          | 4           | 10            | 31             | 44           |
| 108083       | Pip5k2b     | 118        | 739          | 929           | 269         | 95          | 696           | 775            | 251          |
| 108089       | Rnf144      | 83         | 70           | 238           | 3273        | 164         | 153           | 440            | 6225         |
| 108096       | Slco1a5     | 4          | 20           | 40            | 20          | 4           | 16            | 41             | 21           |
| 108097       | Prkab2      | 28         | 76           | 34            | 237         | 53          | 213           | 49             | 472          |
| 108099       | Prkag2      | 52         | 133          | 122           | 174         | 26          | 75            | 87             | 118          |
| 108100       | Baiap2      | 25         | 65           | 50            | 1434        | 24          | 54            | 48             | 1107         |
| 108101       | Bc032204    | 183        | 853          | 363           | 2530        | 190         | 660           | 287            | 2439         |
| 108105       | B3gnt5      | 13         | 4            | 55            | 89          | 335         | 327           | 1688           | 2552         |
| 108112       | Eif4ebp3    | 78         | 808          | 297           | 3870        | 84          | 684           | 250            | 3094         |
| 108114       | Slc22a7     | 6          | 5            | 49            | 37          | 7           | 5             | 53             | 79           |

| NCBI Gene ID | Gene Symbol | Affy. CD4+ | Agilent CD4+ | Illumina CD4+ | Nimbl. CD4+ | Affy. CD19+ | Agilent CD19+ | Illumina CD19+ | Nimbl. CD19+ |
|--------------|-------------|------------|--------------|---------------|-------------|-------------|---------------|----------------|--------------|
| 108115       | Slco4a1     | 14         | 17           | 46            | 45          | 20          | 82            | 96             | 147          |
| 108116       | Slco3a1     | 130        | 1344         | 378           | 3994        | 14          | 29            | 19             | 101          |
| 108121       | U2af1       | 94         | 534          | 213           | 13418       | 103         | 623           | 183            | 13823        |
| 108123       | Napg        | 68         | 336          | 168           | 422         | 58          | 219           | 128            | 313          |
| 108124       | Napa        | 85         | 965          | 66            | 514         | 81          | 773           | 61             | 347          |
| 108138       | Xrcc4       | 90         | 227          | 243           | 3021        | 70          | 175           | 153            | 1703         |
| 108143       | Taf9        | 45         | 268          | 90            | 3447        | 47          | 441           | 115            | 4616         |
| 108147       | Atic        | 205        | 126          | 87            | 168         | 163         | 123           | 73             | 144          |
| 108148       | Galnt2      | 97         | 1744         | 1548          | 637         | 54          | 622           | 582            | 201          |
| 108150       | Galnt7      | 133        | 86           | 19            | 1495        | 54          | 23            | 20             | 731          |
| 108151       | Sema3d      | 4          | 2            | 25            | 27          | 5           | 3             | 21             | 33           |
| 108153       | Adamts7     | 19         | 7            | 25            | 55          | 19          | 8             | 27             | 66           |
| 108154       | Adamts6     | 81         | 38           | 140           | 514         | 74          | 43            | 168            | 501          |
| 108155       | Ogt         | 441        | 629          | 776           | 8607        | 425         | 436           | 780            | 6612         |
| 108156       | Mthfd1      | 61         | 367          | 82            | 1197        | 63          | 337           | 59             | 984          |
| 108160       | D0hxs9928e  | 56         | 444          | 391           | 9875        | 59          | 530           | 381            | 9634         |
| 108161       | D0h6s2654e  | 6          | 2            | 25            | 29          | 6           | 3             | 28             | 52           |
| 108645       | Mat2b       | 180        | 1639         | 94            | 3916        | 159         | 1003          | 63             | 2347         |
| 108652       | Slc35b3     | 160        | 1089         | 2777          | 2660        | 79          | 384           | 1367           | 1047         |
| 108653       | 333426k21r  | 6          | 2            | 32            | 44          | 6           | 6             | 27             | 60           |
| 108654       | 333403f05r  | 76         | 53           | 166           | 723         | 56          | 51            | 170            | 328          |
| 108655       | Foxp1       | 495        | 1791         | 661           | 3517        | 709         | 2639          | 797            | 4836         |
| 108657       | Rnpepl1     | 177        | 5191         | 2593          | 509         | 155         | 4133          | 2027           | 405          |
| 108664       | Atp6v1h     | 68         | 233          | 27            | 726         | 69          | 185           | 25             | 562          |
| 108671       | Dnajc9      | 153        | 2707         | 21            | 14506       | 191         | 4325          | 28             | 17328        |
| 108672       | Zdhhc15     | 122        | 49           | 60            | 361         | 8           | 3             | 26             | 18           |
| 108679       | Cops8       | 112        | 267          | 590           | 2449        | 105         | 188           | 532            | 1995         |
| 108682       | Gpt2        | 11         | 6            | 24            | 1091        | 10          | 24            | 34             | 293          |
| 108689       | Obfc1       | 91         | 337          | 87            | 1852        | 56          | 202           | 48             | 1161         |
| 108699       | Chn1        | 4          | 5            | 27            | 32          | 4           | 7             | 31             | 29           |
| 108705       | Pttg1ip     | 71         | 401          | 1753          | 6183        | 61          | 301           | 1314           | 4400         |
| 108723       | Card11      | 192        | 3492         | 396           | 2161        | 236         | 5025          | 453            | 2378         |
| 108760       | Galnt1      | 8          | 6            | 21            | 31          | 9           | 4             | 24             | 47           |
| 108767       | Pnrc1       | 172        | 1526         | 50            | 9226        | 128         | 561           | 67             | 6137         |
| 108802       | Calr4       | 4          | 12           | 39            | 42          | 4           | 13            | 39             | 50           |
| 108837       | Ibtk        | 203        | 649          | 557           | 9883        | 245         | 459           | 528            | 8856         |
| 108853       | Mtrf1l      | 33         | 252          | 290           | 168         | 31          | 335           | 333            | 135          |
| 108888       | Atad3a      | 62         | 223          | 774           | 1795        | 75          | 287           | 796            | 1782         |
| 108897       | 310003c17r  | 8          | 7            | 21            | 18          | 8           | 7             | 23             | 23           |
| 108902       | B3gnt1      | 9          | 152          | 20            | 487         | 9           | 84            | 25             | 387          |
| 108903       | Tbcd        | 78         | 529          | 288           | 770         | 67          | 415           | 261            | 553          |
| 108907       | Nusap1      | 6          | 16           | 74            | 173         | 8           | 71            | 196            | 666          |
| 108912       | Cdca2       | 11         | 304          | 59            | 44          | 13          | 338           | 98             | 80           |
| 108927       | Lhfp        | 12         | 5            | 21            | 143         | 11          | 4             | 25             | 100          |
| 108943       | Rg9mtd2     | 19         | 40           | 131           | 292         | 21          | 56            | 144            | 301          |
| 108946       | Zzz3        | 245        | 245          | 64            | 1673        | 235         | 165           | 58             | 1168         |
| 108954       | Ppp1r15b    | 105        | 514          | 163           | 4877        | 106         | 12128         | 180            | 3070         |
| 108960       | Irak2       | 28         | 168          | 98            | 1204        | 93          | 853           | 346            | 3797         |
| 108989       | Tpr         | 333        | 1260         | 1423          | 3993        | 261         | 693           | 993            | 1976         |
| 109006       | Ciapin1     | 82         | 713          | 426           | 413         | 75          | 796           | 367            | 405          |
| 109042       | Prkcdbp     | 14         | 12           | 32            | 135         | 15          | 7             | 37             | 126          |



| NCBI Gene ID | Gene Symbol | Affy. CD4+ | Agilent CD4+ | Illumina CD4+ | Nimbl. CD4+ | Affy. CD19+ | Agilent CD19+ | Illumina CD19+ | Nimbl. CD19+ |
|--------------|-------------|------------|--------------|---------------|-------------|-------------|---------------|----------------|--------------|
| 109054       | Pfdn4       | 18         | 10           | 186           | 6279        | 17          | 10            | 172            | 5530         |
| 109075       | Exosc4      | 30         | 451          | 405           | 2403        | 28          | 358           | 346            | 1429         |
| 109079       | Sephs1      | 70         | 64           | 80            | 622         | 61          | 38            | 72             | 532          |
| 109082       | Fbxw17      | 11         | 351          | 211           | 37          | 12          | 362           | 207            | 60           |
| 109108       | Slc30a9     | 71         | 120          | 53            | 796         | 74          | 122           | 60             | 679          |
| 109113       | Uhrf2       | 110        | 717          | 1406          | 2889        | 96          | 566           | 1207           | 1641         |
| 109115       | Supt3h      | 54         | 45           | 485           | 93          | 49          | 39            | 417            | 83           |
| 109135       | Plekha5     | 43         | 180          | 99            | 185         | 12          | 22            | 36             | 55           |
| 109136       | Mmaa        | 12         | 414          | 22            | 148         | 18          | 632           | 21             | 166          |
| 109151       | Chd9        | 93         | 63           | 171           | 726         | 163         | 90            | 312            | 898          |
| 109225       | Ms4a7       | 4          | 4            | 28            | 37          | 5           | 27            | 25             | 270          |
| 109241       | Mbd5        | 35         | 7            | 42            | 84          | 34          | 7             | 44             | 95           |
| 109242       | Kif24       | 9          | 114          | 30            | 548         | 13          | 186           | 29             | 476          |
| 109270       | Arhgap8     | 18         | 4            | 30            | 47          | 150         | 131           | 273            | 384          |
| 109272       | J30451f13r  | 8          | 4            | 27            | 48          | 11          | 3             | 29             | 54           |
| 109275       | Actr5       | 50         | 1325         | 76            | 590         | 51          | 1348          | 74             | 667          |
| 109284       | O30046i01r  | 159        | 131          | 187           | 59          | 133         | 112           | 168            | 62           |
| 109314       | O30004j04r  | 5          | 2            | 25            | 55          | 5           | 3             | 32             | 34           |
| 109323       | C1qtnf7     | 7          | 2            | 23            | 14          | 6           | 3             | 21             | 16           |
| 109331       | Rnf20       | 150        | 742          | 47            | 352         | 154         | 367           | 45             | 359          |
| 109333       | Pkn2        | 151        | 209          | 202           | 2143        | 131         | 165           | 163            | 2253         |
| 109342       | Slc5a10     | 10         | 70           | 19            | 44          | 11          | 76            | 20             | 52           |
| 109359       | I30003p19r  | 85         | 90           | 1050          | 1064        | 113         | 125           | 1265           | 1130         |
| 109552       | Sri         | 228        | 2612         | 1381          | 11995       | 199         | 1774          | 1002           | 8764         |
| 109575       | Tbx10       | 9          | 2            | 38            | 49          | 8           | 3             | 41             | 58           |
| 109593       | Lmo3        | 5          | 20           | 26            | 42          | 5           | 14            | 26             | 52           |
| 109594       | Lmo1        | 6          | 2            | 25            | 37          | 5           | 3             | 23             | 66           |
| 109620       | Dsp         | 10         | 5            | 25            | 20          | 11          | 5             | 24             | 26           |
| 109624       | Cald1       | 5          | 2            | 31            | 42          | 5           | 3             | 27             | 51           |
| 109637       | Upk1a       | 8          | 42           | 23            | 33          | 7           | 31            | 21             | 37           |
| 109648       | Npy         | 11         | 2            | 24            | 23          | 12          | 3             | 26             | 23           |
| 109652       | Acy1        | 11         | 27           | 62            | 324         | 13          | 37            | 76             | 378          |
| 109660       | Ctrl        | 18         | 66           | 102           | 328         | 20          | 69            | 100            | 385          |
| 109672       | Cyb5        | 193        | 1627         | 2899          | 11098       | 75          | 609           | 969            | 3753         |
| 109674       | Ampd2       | 44         | 476          | 79            | 198         | 41          | 363           | 69             | 216          |
| 109676       | Ank2        | 7          | 3            | 28            | 71          | 7           | 3             | 26             | 47           |
| 109685       | Hyal3       | 18         | 26           | 41            | 42          | 17          | 23            | 36             | 54           |
| 109689       | Arrb1       | 121        | 991          | 42            | 268         | 70          | 740           | 33             | 161          |
| 109697       | Cpa1        | 7          | 13           | 32            | 23          | 6           | 14            | 27             | 30           |
| 109700       | Itga1       | 5          | 8            | 31            | 39          | 5           | 15            | 30             | 23           |
| 109711       | Actn1       | 610        | 261          | 111           | 314         | 25          | 22            | 22             | 34           |
| 109731       | Maob        | 6          | 3            | 31            | 12          | 5           | 3             | 33             | 15           |
| 109778       | Blvra       | 87         | 305          | 662           | 599         | 67          | 235           | 418            | 321          |
| 109785       | Pgm3        | 28         | 99           | 34            | 261         | 28          | 123           | 44             | 188          |
| 109791       | Clps        | 15         | 15           | 25            | 28          | 18          | 12            | 24             | 23           |
| 109801       | Glo1        | 69         | 526          | 903           | 4103        | 47          | 395           | 655            | 2555         |
| 109815       | H47         | 49         | 1063         | 999           | 8482        | 41          | 971           | 970            | 8149         |
| 109820       | Pgc         | 7          | 14           | 25            | 43          | 7           | 13            | 26             | 38           |
| 109821       | F11         | 6          | 7            | 27            | 24          | 6           | 7             | 34             | 24           |
| 109857       | Cbr3        | 6          | 15           | 25            | 31          | 6           | 20            | 23             | 35           |
| 109880       | Braf        | 99         | 105          | 169           | 27          | 125         | 131           | 237            | 22           |

| NCBI<br>Gene ID | Gene<br>Symbol | Affy.<br>CD4+ | Agilent<br>CD4+ | Illumina<br>CD4+ | Nimbl.<br>CD4+ | Affy.<br>CD19+ | Agilent<br>CD19+ | Illumina<br>CD19+ | Nimbl.<br>CD19+ |
|-----------------|----------------|---------------|-----------------|------------------|----------------|----------------|------------------|-------------------|-----------------|
| 109900          | Asl            | 40            | 203             | 340              | 746            | 22             | 97               | 171               | 418             |
| 109901          | Ela1           | 13            | 15              | 25               | 104            | 12             | 12               | 26                | 116             |
| 109904          | Mcf2           | 4             | 2               | 23               | 29             | 5              | 3                | 20                | 42              |
| 109905          | Rap1a          | 401           | 1564            | 20               | 2397           | 330            | 1277             | 22                | 1578            |
| 109934          | Abr            | 95            | 197             | 424              | 2107           | 51             | 69               | 183               | 780             |
| 109978          | Art4           | 12            | 59              | 82               | 942            | 10             | 12               | 34                | 291             |
| 109979          | Art3           | 6             | 7               | 45               | 20             | 5              | 3                | 42                | 17              |
| 110012          | Gtrgeo22       | 36            | 38              | 65               | 579            | 36             | 70               | 54                | 633             |
| 110033          | Kif22          | 9             | 296             | 79               | 28             | 9              | 469              | 98                | 48              |
| 110052          | Dek            | 118           | 750             | 302              | 642            | 147            | 568              | 331               | 657             |
| 110075          | Bmp3           | 12            | 10              | 32               | 24             | 11             | 7                | 32                | 22              |
| 110078          | Pygb           | 147           | 172             | 326              | 3912           | 102            | 165              | 236               | 3585            |
| 110082          | Dnahc5         | 6             | 15              | 26               | 26             | 6              | 19               | 30                | 23              |
| 110084          | Dnahc1         | 7             | 38              | 23               | 59             | 8              | 22               | 20                | 96              |
| 110094          | Phka2          | 43            | 187             | 122              | 39             | 65             | 226              | 146               | 70              |
| 110095          | Pygl           | 6             | 13              | 39               | 24             | 7              | 50               | 43                | 100             |
| 110109          | Nol1           | 87            | 1187            | 259              | 355            | 87             | 1208             | 219               | 376             |
| 110135          | Fgb            | 7             | 6               | 17               | 21             | 7              | 4                | 18                | 18              |
| 110157          | Raf1           | 185           | 1798            | 487              | 1692           | 187            | 1266             | 409               | 1234            |
| 110168          | Gpr18          | 211           | 171             | 2403             | 12214          | 335            | 331              | 3629              | 18905           |
| 110172          | Slc35b1        | 79            | 982             | 525              | 322            | 91             | 997              | 1068              | 279             |
| 110173          | Manba          | 47            | 276             | 120              | 2475           | 53             | 374              | 148               | 2354            |
| 110187          | Abpg           | 4             | 2               | 34               | 19             | 5              | 3                | 35                | 18              |
| 110196          | Fdps           | 37            | 264             | 801              | 2128           | 29             | 139              | 381               | 1125            |
| 110197          | Dgkg           | 9             | 8               | 42               | 49             | 7              | 7                | 36                | 39              |
| 110198          | Akr7a5         | 41            | 188             | 525              | 166            | 43             | 306              | 833               | 248             |
| 110208          | Pgd            | 112           | 408             | 1210             | 4173           | 112            | 490              | 1219              | 3993            |
| 110213          | Tegt           | 377           | 2132            | 5250             | 8597           | 363            | 1987             | 4915              | 9295            |
| 110253          | Triobp         | 34            | 296             | 2376             | 372            | 37             | 229              | 2236              | 421             |
| 110265          | Msra           | 31            | 221             | 24               | 523            | 27             | 193              | 22                | 344             |
| 110279          | Bcr            | 89            | 793             | 58               | 241            | 90             | 605              | 62                | 343             |
| 110304          | Glra3          | 4             | 3               | 31               | 21             | 4              | 3                | 33                | 19              |
| 110326          | Tas1r1         | 7             | 24              | 18               | 66             | 7              | 18               | 22                | 210             |
| 110355          | Adrbk1         | 569           | 2416            | 233              | 3183           | 690            | 2663             | 229               | 4120            |
| 110382          | C8b            | 5             | 3               | 28               | 42             | 6              | 3                | 26                | 50              |
| 110385          | Pde4c          | 14            | 39              | 21               | 140            | 17             | 29               | 23                | 143             |
| 110391          | Qdpr           | 88            | 552             | 476              | 10607          | 85             | 446              | 365               | 6903            |
| 110417          | Pigh           | 15            | 38              | 43               | 369            | 16             | 50               | 41                | 404             |
| 110446          | Acat1          | 97            | 219             | 42               | 4553           | 80             | 216              | 37                | 3863            |
| 110454          | Ly6a           | 300           | 319             | 2081             | 2530           | 857            | 823              | 5302              | 6080            |
| 110460          | Acat2          | 55            | 104             | 260              | 4000           | 48             | 99               | 180               | 2476            |
| 110511          | Olf153         | 5             | 11              | 23               | 55             | 5              | 11               | 23                | 51              |
| 110521          | Hivep1         | 127           | 52              | 42               | 135            | 172            | 67               | 37                | 148             |
| 110524          | Dgkq           | 39            | 194             | 477              | 237            | 34             | 161              | 400               | 139             |
| 110532          | Adarb1         | 13            | 27              | 35               | 154            | 12             | 20               | 34                | 168             |
| 110542          | Amhr2          | 6             | 19              | 37               | 61             | 6              | 9                | 42                | 42              |
| 110593          | Prdm2          | 148           | 57              | 554              | 1788           | 168            | 71               | 645               | 1896            |
| 110595          | Timp4          | 6             | 52              | 24               | 29             | 5              | 35               | 24                | 38              |
| 110596          | Rgnef          | 8             | 3               | 22               | 24             | 9              | 5                | 21                | 29              |
| 110606          | Fntb           | 36            | 73              | 1256             | 204            | 17             | 21               | 328               | 66              |
| 110611          | Hdlbp          | 222           | 746             | 45               | 546            | 273            | 709              | 46                | 490             |

| NCBI Gene ID | Gene Symbol | Affy. CD4+ | Agilent CD4+ | Illumina CD4+ | Nimbl. CD4+ | Affy. CD19+ | Agilent CD19+ | Illumina CD19+ | Nimbl. CD19+ |
|--------------|-------------|------------|--------------|---------------|-------------|-------------|---------------|----------------|--------------|
| 110637       | Grik4       | 6          | 3            | 28            | 80          | 7           | 4             | 28             | 57           |
| 110639       | Prps2       | 137        | 152          | 609           | 6735        | 128         | 134           | 578            | 6351         |
| 110648       | Lmx1a       | 9          | 2            | 26            | 36          | 8           | 3             | 24             | 42           |
| 110651       | Rps6ka3     | 244        | 161          | 130           | 1823        | 153         | 83            | 79             | 1502         |
| 110695       | Aldh7a1     | 12         | 14           | 28            | 185         | 12          | 10            | 27             | 182          |
| 110696       | H2-m10.3    | 9          | 2            | 24            | 14          | 9           | 3             | 24             | 14           |
| 110749       | Chaf1b      | 28         | 468          | 205           | 306         | 21          | 374           | 140            | 115          |
| 110750       | Cse1l       | 310        | 311          | 369           | 2032        | 432         | 410           | 529            | 2634         |
| 110751       | Adam33      | 25         | 13           | 25            | 307         | 27          | 13            | 28             | 337          |
| 110784       | Nr3c2       | 6          | 37           | 27            | 57          | 6           | 28            | 33             | 119          |
| 110805       | Foxe1       | 25         | 6            | 37            | 75          | 25          | 8             | 35             | 43           |
| 110809       | Sfrs1       | 269        | 1212         | 1602          | 10075       | 332         | 1466          | 1917           | 11709        |
| 110821       | Pcca        | 60         | 90           | 77            | 901         | 40          | 59            | 50             | 732          |
| 110826       | Etfb        | 44         | 1482         | 524           | 4985        | 68          | 2579          | 759            | 7766         |
| 110829       | Lims1       | 167        | 370          | 52            | 4942        | 128         | 151           | 43             | 4165         |
| 110834       | Chrna3      | 7          | 3            | 26            | 37          | 7           | 3             | 25             | 31           |
| 110835       | Chrna5      | 5          | 2            | 24            | 31          | 5           | 3             | 24             | 38           |
| 110842       | Etfa        | 105        | 333          | 1523          | 1281        | 100         | 341           | 1311           | 725          |
| 110854       | Ppp2r4      | 101        | 281          | 243           | 1172        | 164         | 547           | 351            | 1676         |
| 110855       | Pde6c       | 6          | 8            | 26            | 23          | 7           | 7             | 24             | 23           |
| 110862       | Kcnq3       | 7          | 4            | 34            | 26          | 7           | 3             | 34             | 21           |
| 110877       | Slc18a1     | 5          | 39           | 23            | 31          | 6           | 31            | 24             | 41           |
| 110880       | Scn4a       | 9          | 75           | 16            | 86          | 11          | 142           | 33             | 98           |
| 110886       | Gabra5      | 5          | 17           | 19            | 87          | 5           | 18            | 22             | 72           |
| 110891       | Slc8a2      | 7          | 55           | 35            | 154         | 6           | 38            | 39             | 197          |
| 110893       | Slc8a3      | 8          | 11           | 26            | 85          | 8           | 13            | 24             | 119          |
| 110895       | Slc9a4      | 7          | 15           | 24            | 19          | 8           | 12            | 22             | 22           |
| 110902       | Chrna2      | 5          | 7            | 33            | 25          | 6           | 3             | 35             | 31           |
| 110911       | Cds2        | 190        | 5049         | 44            | 9684        | 144         | 4159          | 37             | 6137         |
| 110920       | Stch        | 20         | 130          | 23            | 115         | 30          | 165           | 22             | 108          |
| 110935       | Atp6v1b1    | 8          | 3            | 23            | 61          | 7           | 3             | 21             | 97           |
| 110948       | Hlcs        | 36         | 122          | 154           | 780         | 25          | 91            | 110            | 515          |
| 110954       | Rpl10       | 2389       | 17478        | 13225         | 29915       | 2299        | 14178         | 12555          | 30019        |
| 110957       | D1pas1      | 8          | 25           | 30            | 29          | 7           | 28            | 30             | 42           |
| 110960       | Tars        | 74         | 994          | 195           | 9297        | 77          | 985           | 189            | 10831        |
| 111175       | Pecr        | 7          | 55           | 38            | 282         | 7           | 117           | 35             | 917          |
| 111507       | Igh-6       | 12         | 5584         | 3552          | 13647       | 61          | 162608        | 15323          | 32608        |
| 112403       | Dom3z       | 65         | 211          | 345           | 53          | 70          | 216           | 344            | 41           |
| 112405       | Egln1       | 141        | 110          | 171           | 307         | 71          | 48            | 75             | 92           |
| 112406       | Egln2       | 140        | 567          | 542           | 710         | 170         | 778           | 692            | 993          |
| 112407       | Egln3       | 10         | 10           | 64            | 218         | 7           | 7             | 61             | 82           |
| 112408       | Tas2r116    | 4          | 5            | 22            | 17          | 4           | 6             | 22             | 15           |
| 113846       | V1ra4       | 5          | 103          | 21            | 17          | 5           | 95            | 25             | 15           |
| 113847       | V1ra5       | 4          | 35           | 35            | 16          | 3           | 28            | 35             | 20           |
| 113848       | V1ra6       | 4          | 26           | 23            | 17          | 5           | 28            | 27             | 16           |
| 113849       | V1ra7       | 4          | 4            | 25            | 18          | 4           | 4             | 23             | 19           |
| 113851       | V1ra9       | 4          | 9            | 29            | 21          | 4           | 14            | 25             | 23           |
| 113852       | V1rb1       | 5          | 2            | 25            | 13          | 6           | 3             | 25             | 15           |
| 113853       | V1rb3       | 4          | 4            | 23            | 13          | 4           | 5             | 23             | 18           |
| 113854       | V1rb4       | 5          | 3            | 30            | 25          | 5           | 4             | 31             | 27           |
| 113855       | V1rb7       | 5          | 5            | 16            | 17          | 5           | 9             | 18             | 16           |

| NCBI Gene ID | Gene Symbol | Affy. CD4+ | Agilent CD4+ | Illumina CD4+ | Nimbl. CD4+ | Affy. CD19+ | Agilent CD19+ | Illumina CD19+ | Nimbl. CD19+ |
|--------------|-------------|------------|--------------|---------------|-------------|-------------|---------------|----------------|--------------|
| 113856       | V1rb8       | 4          | 129          | 21            | 17          | 4           | 155           | 20             | 18           |
| 113858       | V1rc1       | 6          | 19           | 30            | 15          | 6           | 14            | 34             | 14           |
| 113859       | V1rc2       | 4          | 2            | 28            | 33          | 4           | 3             | 25             | 17           |
| 113860       | V1rc3       | 4          | 10           | 24            | 15          | 4           | 9             | 24             | 12           |
| 113862       | V1rc5       | 4          | 7            | 30            | 18          | 4           | 7             | 25             | 20           |
| 113863       | V1rc6       | 5          | 2            | 23            | 20          | 4           | 3             | 24             | 14           |
| 113864       | V1rc7       | 4          | 5            | 30            | 18          | 4           | 9             | 28             | 18           |
| 113865       | V1rc8       | 4          | 93           | 25            | 23          | 4           | 104           | 29             | 26           |
| 114128       | Laptn4b     | 21         | 25           | 27            | 132         | 15          | 7             | 29             | 50           |
| 114141       | Cldn16      | 10         | 3            | 22            | 126         | 10          | 5             | 21             | 108          |
| 114142       | Foxp2       | 5          | 10           | 36            | 24          | 6           | 15            | 40             | 49           |
| 114143       | Atp6v0b     | 107        | 393          | 544           | 5033        | 237         | 852           | 993            | 8203         |
| 114230       | Aipl1       | 7          | 11           | 32            | 25          | 7           | 7             | 31             | 32           |
| 114249       | Npnt        | 11         | 6            | 60            | 17          | 10          | 3             | 57             | 20           |
| 114255       | Dok4        | 7          | 10           | 66            | 299         | 7           | 18            | 103            | 631          |
| 114301       | Palmd       | 6          | 12           | 36            | 37          | 6           | 26            | 39             | 42           |
| 114304       | Slc28a3     | 6          | 20           | 43            | 24          | 6           | 27            | 41             | 37           |
| 114479       | Slc5a5      | 11         | 5            | 33            | 69          | 12          | 5             | 30             | 64           |
| 114565       | Zfp295      | 66         | 22           | 116           | 91          | 64          | 31            | 109            | 97           |
| 114570       | Crip3       | 16         | 13           | 24            | 25          | 20          | 256           | 63             | 349          |
| 114584       | Clic1       | 128        | 8045         | 553           | 13158       | 157         | 14256         | 527            | 14220        |
| 114585       | D17h6s53e   | 43         | 12           | 44            | 55          | 38          | 7             | 47             | 46           |
| 114602       | Zmynd10     | 8          | 50           | 43            | 47          | 7           | 23            | 31             | 43           |
| 114604       | Prdm15      | 66         | 417          | 323           | 3400        | 52          | 320           | 289            | 2101         |
| 114606       | Tle6        | 10         | 40           | 42            | 93          | 13          | 65            | 38             | 71           |
| 114615       | Elac1       | 28         | 34           | 143           | 63          | 28          | 31            | 133            | 49           |
| 114640       | Tifp39      | 17         | 60           | 33            | 85          | 16          | 100           | 37             | 109          |
| 114641       | Rpl31       | 1551       | 547          | 607           | 33905       | 1280        | 339           | 494            | 31800        |
| 114642       | Brdt        | 7          | 33           | 107           | 382         | 6           | 8             | 52             | 164          |
| 114643       | Oas1c       | 21         | 470          | 144           | 3862        | 26          | 490           | 110            | 3257         |
| 114644       | Slc13a3     | 7          | 3            | 32            | 299         | 8           | 3             | 31             | 267          |
| 114652       | Ly6g5c      | 6          | 79           | 25            | 18          | 6           | 54            | 23             | 22           |
| 114654       | Ly6g6d      | 5          | 72           | 24            | 65          | 5           | 50            | 24             | 72           |
| 114663       | Impa2       | 40         | 264          | 66            | 613         | 29          | 152           | 57             | 427          |
| 114675       | 32431p20r   | 7          | 2            | 36            | 23          | 6           | 3             | 40             | 20           |
| 114712       | Ferd3l      | 6          | 5            | 35            | 92          | 5           | 6             | 40             | 122          |
| 114713       | Rasa2       | 129        | 306          | 490           | 170         | 114         | 225           | 352            | 151          |
| 114714       | Rad51c      | 13         | 5            | 84            | 150         | 18          | 17            | 182            | 137          |
| 114715       | Spred1      | 24         | 27           | 114           | 52          | 19          | 11            | 81             | 49           |
| 114716       | Spred2      | 125        | 88           | 35            | 145         | 33          | 14            | 28             | 49           |
| 114741       | Supt16h     | 157        | 328          | 162           | 580         | 184         | 441           | 201            | 856          |
| 114774       | Pawr        | 16         | 2            | 58            | 36          | 16          | 3             | 58             | 38           |
| 114863       | Prosc       | 65         | 921          | 49            | 520         | 70          | 1059          | 50             | 349          |
| 114873       | Dscaml1     | 7          | 32           | 26            | 43          | 8           | 31            | 22             | 84           |
| 114874       | Ddhd1       | 181        | 78           | 251           | 1908        | 178         | 91            | 208            | 1462         |
| 114875       | Plcz1       | 4          | 2            | 27            | 23          | 5           | 3             | 26             | 29           |
| 114886       | Cygb        | 13         | 20           | 23            | 31          | 13          | 16            | 20             | 30           |
| 114889       | Vsx1        | 10         | 2            | 32            | 26          | 12          | 3             | 37             | 23           |
| 114896       | Afg3l1      | 66         | 186          | 274           | 904         | 74          | 223           | 242            | 655          |
| 116701       | Fgfr1       | 35         | 22           | 30            | 74          | 32          | 20            | 37             | 66           |
| 116732       | Tsga13      | 4          | 2            | 23            | 44          | 6           | 65            | 30             | 247          |

| NCBI Gene ID | Gene Symbol | Affy. CD4+ | Agilent CD4+ | Illumina CD4+ | Nimbl. CD4+ | Affy. CD19+ | Agilent CD19+ | Illumina CD19+ | Nimbl. CD19+ |
|--------------|-------------|------------|--------------|---------------|-------------|-------------|---------------|----------------|--------------|
| 116733       | Vps4a       | 61         | 21           | 523           | 1743        | 55          | 13            | 443            | 1343         |
| 116746       | Defb6       | 6          | 2            | 18            | 50          | 8           | 3             | 18             | 29           |
| 116748       | Lsm10       | 36         | 1207         | 1015          | 613         | 36          | 1329          | 894            | 537          |
| 116810       | Foxn4       | 10         | 4            | 33            | 38          | 10          | 3             | 31             | 46           |
| 116837       | Rims1       | 6          | 20           | 25            | 55          | 6           | 18            | 26             | 46           |
| 116838       | Rims2       | 4          | 3            | 30            | 15          | 5           | 7             | 31             | 23           |
| 116847       | Prelp       | 8          | 13           | 23            | 17          | 8           | 13            | 19             | 21           |
| 116848       | Baz2a       | 236        | 1183         | 54            | 8358        | 223         | 929           | 52             | 8533         |
| 116852       | Akr1c20     | 5          | 8            | 24            | 30          | 5           | 8             | 23             | 22           |
| 116870       | Mta1        | 191        | 1052         | 62            | 133         | 101         | 379           | 38             | 95           |
| 116871       | Mta3        | 160        | 565          | 326           | 5139        | 179         | 741           | 530            | 6367         |
| 116872       | Serpinb7    | 4          | 4            | 22            | 27          | 5           | 23            | 20             | 135          |
| 116873       | Stim2       | 139        | 604          | 289           | 359         | 106         | 315           | 221            | 162          |
| 116903       | Calcb       | 7          | 2            | 22            | 26          | 7           | 3             | 20             | 20           |
| 116913       | Tpbpb       | 4          | 11           | 30            | 38          | 4           | 3             | 28             | 52           |
| 116914       | Slc19a2     | 20         | 107          | 131           | 81          | 18          | 105           | 129            | 72           |
| 117004       | Olf73       | 5          | 12           | 28            | 13          | 5           | 17            | 27             | 16           |
| 117005       | Olf74       | 5          | 64           | 20            | 16          | 5           | 60            | 20             | 16           |
| 117066       | Cts3        | 5          | 2            | 30            | 23          | 5           | 3             | 25             | 47           |
| 117109       | Pop5        | 34         | 4766         | 1515          | 2414        | 24          | 3519          | 963            | 2058         |
| 117146       | Ube3b       | 110        | 1580         | 1106          | 132         | 107         | 1063          | 831            | 154          |
| 117148       | Efcfbp2     | 5          | 53           | 21            | 64          | 5           | 35            | 31             | 35           |
| 117149       | Tirap       | 12         | 18           | 35            | 56          | 30          | 121           | 55             | 296          |
| 117150       | Pip5k2c     | 39         | 681          | 604           | 105         | 50          | 932           | 720            | 140          |
| 117158       | Scgb3a2     | 5          | 4310         | 43            | 21          | 6           | 59            | 43             | 21           |
| 117160       | Ttyh2       | 25         | 3            | 39            | 188         | 26          | 3             | 42             | 161          |
| 117172       | 310034c09r  | 4          | 8            | 23            | 55          | 4           | 5             | 25             | 58           |
| 117197       | Cno         | 45         | 434          | 474           | 2419        | 47          | 656           | 537            | 2892         |
| 117198       | lvns1abp    | 240        | 770          | 1059          | 7492        | 413         | 1340          | 2031           | 8561         |
| 117586       | A1bg        | 6          | 2            | 22            | 36          | 6           | 3             | 23             | 33           |
| 117589       | Asb7        | 17         | 158          | 154           | 1591        | 20          | 193           | 184            | 1566         |
| 117590       | Asb10       | 9          | 4            | 30            | 24          | 8           | 3             | 30             | 21           |
| 117591       | Slc2a9      | 36         | 16           | 65            | 563         | 30          | 10            | 48             | 313          |
| 117592       | B3galt6     | 8          | 75           | 142           | 781         | 9           | 73            | 118            | 757          |
| 117599       | Helb        | 92         | 350          | 1227          | 1494        | 68          | 235           | 1034           | 890          |
| 117600       | Srgap1      | 11         | 2            | 27            | 37          | 11          | 5             | 27             | 41           |
| 117606       | Boc         | 11         | 12           | 46            | 41          | 11          | 10            | 45             | 53           |
| 118445       | Klf16       | 114        | 107          | 119           | 1144        | 112         | 143           | 153            | 1140         |
| 118452       | Baalc       | 7          | 8            | 45            | 79          | 7           | 10            | 43             | 64           |
| 118453       | Mmp28       | 8          | 7            | 27            | 34          | 7           | 8             | 28             | 44           |
| 118454       | Gja12       | 12         | 12           | 33            | 102         | 13          | 11            | 30             | 117          |
| 121021       | Cspg4       | 11         | 30           | 79            | 31          | 9           | 27            | 78             | 54           |
| 140474       | Muc4        | 8          | 26           | 23            | 45          | 8           | 27            | 23             | 43           |
| 140475       | Bsnd        | 9          | 48           | 22            | 39          | 9           | 39            | 23             | 89           |
| 140476       | Strc        | 8          | 21           | 26            | 29          | 8           | 17            | 27             | 28           |
| 140481       | Man2a2      | 126        | 1255         | 120           | 3928        | 115         | 907           | 99             | 4338         |
| 140482       | Zfp358      | 38         | 61           | 122           | 103         | 60          | 86            | 149            | 145          |
| 140483       | Hnmt        | 4          | 6            | 18            | 45          | 4           | 4             | 23             | 53           |
| 140486       | Igf2bp1     | 7          | 5            | 30            | 31          | 7           | 3             | 29             | 29           |
| 140488       | Igf2bp3     | 14         | 21           | 105           | 79          | 16          | 32            | 150            | 112          |
| 140489       | Bhlhb4      | 14         | 2            | 29            | 15          | 11          | 5             | 24             | 17           |

| NCBI Gene ID | Gene Symbol | Affy. CD4+ | Agilent CD4+ | Illumina CD4+ | Nimbl. CD4+ | Affy. CD19+ | Agilent CD19+ | Illumina CD19+ | Nimbl. CD19+ |
|--------------|-------------|------------|--------------|---------------|-------------|-------------|---------------|----------------|--------------|
| 140491       | Ppp1r3a     | 4          | 13           | 23            | 17          | 4           | 11            | 19             | 16           |
| 140492       | Kcnn2       | 399        | 4            | 62            | 37          | 262         | 3             | 61             | 29           |
| 140493       | Kcnn3       | 8          | 5            | 40            | 34          | 8           | 5             | 40             | 30           |
| 140494       | Atp6v0a4    | 7          | 3            | 33            | 50          | 7           | 3             | 26             | 48           |
| 140499       | Ube2j2      | 65         | 331          | 50            | 1752        | 68          | 288           | 46             | 1369         |
| 140500       | Centb5      | 37         | 206          | 222           | 158         | 28          | 151           | 164            | 149          |
| 140546       | Prnpip1     | 63         | 15           | 62            | 582         | 77          | 21            | 79             | 540          |
| 140559       | Igsf8       | 20         | 86           | 33            | 161         | 21          | 131           | 35             | 134          |
| 140570       | Plxnb2      | 7          | 18           | 32            | 48          | 18          | 86            | 100            | 165          |
| 140571       | Plxnb3      | 6          | 10           | 24            | 39          | 7           | 11            | 27             | 39           |
| 140577       | Ankrd6      | 9          | 22           | 32            | 40          | 8           | 10            | 35             | 31           |
| 140579       | Elmo2       | 62         | 85           | 48            | 223         | 55          | 65            | 43             | 216          |
| 140580       | Elmo1       | 325        | 146          | 1540          | 92          | 261         | 119           | 1010           | 65           |
| 140630       | Ube4a       | 172        | 254          | 706           | 116         | 148         | 168           | 688            | 105          |
| 140703       | Emid1       | 33         | 104          | 38            | 224         | 54          | 848           | 86             | 1539         |
| 140709       | Emid2       | 35         | 3            | 23            | 21          | 36          | 5             | 25             | 27           |
| 140721       | Caskin2     | 10         | 28           | 36            | 53          | 13          | 105           | 70             | 102          |
| 140723       | Cacng5      | 8          | 7            | 27            | 78          | 8           | 9             | 22             | 56           |
| 140740       | Sec63       | 150        | 192          | 563           | 1426        | 131         | 170           | 490            | 841          |
| 140741       | Gpr6        | 13         | 8            | 27            | 160         | 13          | 13            | 24             | 73           |
| 140742       | Sesn1       | 232        | 3909         | 1774          | 2456        | 212         | 3275          | 1773           | 1813         |
| 140743       | Rem2        | 6          | 9            | 34            | 69          | 6           | 8             | 29             | 54           |
| 140765       | Tmprss3     | 10         | 21           | 31            | 97          | 11          | 19            | 29             | 75           |
| 140780       | Bmp2k       | 77         | 77           | 25            | 21          | 360         | 332           | 52             | 41           |
| 140781       | Myh7        | 9          | 9            | 27            | 34          | 8           | 9             | 30             | 41           |
| 140792       | Colec12     | 7          | 2            | 230           | 48          | 6           | 3             | 132            | 66           |
| 140795       | P2ry14      | 6          | 3            | 80            | 137         | 5           | 2             | 28             | 50           |
| 140858       | Wdr5        | 67         | 368          | 246           | 6265        | 75          | 351           | 213            | 7001         |
| 140859       | Nek8        | 16         | 103          | 74            | 157         | 20          | 154           | 104            | 202          |
| 140887       | Lnx2        | 52         | 234          | 280           | 1419        | 55          | 208           | 266            | 1585         |
| 140904       | Caln1       | 7          | 16           | 35            | 46          | 6           | 25            | 35             | 67           |
| 140917       | Dclre1b     | 60         | 24           | 152           | 684         | 59          | 20            | 131            | 427          |
| 140918       | Slc7a12     | 4          | 4            | 31            | 22          | 4           | 6             | 25             | 21           |
| 140919       | Slc17a6     | 5          | 32           | 35            | 18          | 4           | 21            | 32             | 19           |
| 142681       | Slc34a3     | 16         | 17           | 27            | 43          | 17          | 15            | 26             | 44           |
| 142682       | Zcchc14     | 9          | 5            | 78            | 43          | 9           | 6             | 44             | 27           |
| 142687       | Asb14       | 5          | 2            | 21            | 65          | 5           | 3             | 31             | 22           |
| 142688       | Asb13       | 116        | 369          | 30            | 497         | 111         | 331           | 27             | 447          |
| 142980       | Tlr3        | 7          | 2            | 23            | 14          | 10          | 6             | 28             | 28           |
| 170439       | Elovl6      | 46         | 88           | 142           | 1213        | 16          | 23            | 55             | 332          |
| 170441       | Slc2a10     | 5          | 5            | 34            | 47          | 5           | 5             | 28             | 97           |
| 170442       | Bbox1       | 5          | 6            | 21            | 17          | 5           | 6             | 25             | 27           |
| 170458       | Gpha2       | 13         | 98           | 23            | 81          | 13          | 87            | 21             | 85           |
| 170459       | Stard4      | 43         | 53           | 447           | 1057        | 31          | 31            | 432            | 670          |
| 170460       | Stard5      | 60         | 78           | 145           | 1114        | 78          | 114           | 232            | 1760         |
| 170461       | Stard6      | 6          | 4            | 27            | 393         | 5           | 3             | 27             | 334          |
| 170472       | Recql5      | 31         | 37           | 69            | 160         | 75          | 128           | 218            | 579          |
| 170483       | Grin3b      | 18         | 11           | 39            | 100         | 18          | 10            | 32             | 104          |
| 170571       | Cntnap4     | 11         | 14           | 21            | 21          | 10          | 16            | 23             | 30           |
| 170574       | Sp7         | 6          | 59           | 30            | 60          | 6           | 41            | 28             | 33           |
| 170625       | Snag1       | 38         | 460          | 570           | 8092        | 33          | 822           | 510            | 5637         |

| NCBI Gene ID | Gene Symbol | Affy. CD4+ | Agilent CD4+ | Illumina CD4+ | Nimbl. CD4+ | Affy. CD19+ | Agilent CD19+ | Illumina CD19+ | Nimbl. CD19+ |
|--------------|-------------|------------|--------------|---------------|-------------|-------------|---------------|----------------|--------------|
| 170638       | Hpcal4      | 6          | 10           | 35            | 74          | 6           | 12            | 33             | 57           |
| 170639       | Olfir560    | 5          | 4            | 23            | 22          | 4           | 3             | 26             | 19           |
| 170644       | Ubn1        | 77         | 740          | 47            | 540         | 48          | 423           | 33             | 299          |
| 170651       | Krtap16-1   | 5          | 6            | 18            | 13          | 5           | 5             | 23             | 14           |
| 170654       | Krtap16-4   | 51         | 3            | 31            | 47          | 47          | 3             | 23             | 66           |
| 170656       | Krtap6-2    | 5          | 3            | 19            | 28          | 5           | 3             | 21             | 23           |
| 170657       | Krtap16-9   | 4          | 760          | 27            | 15          | 4           | 477           | 22             | 17           |
| 170676       | Peg10       | 6          | 2            | 23            | 18          | 7           | 4             | 22             | 19           |
| 170677       | Pcdh21      | 6          | 2            | 28            | 30          | 6           | 3             | 30             | 41           |
| 170707       | Usp48       | 211        | 311          | 602           | 784         | 198         | 267           | 542            | 472          |
| 170716       | Cyp4f13     | 57         | 171          | 562           | 957         | 54          | 159           | 516            | 561          |
| 170718       | Idh3b       | 215        | 568          | 983           | 3395        | 241         | 693           | 997            | 3533         |
| 170719       | Oxr1        | 49         | 118          | 433           | 2102        | 51          | 69            | 391            | 1213         |
| 170720       | Card14      | 14         | 36           | 23            | 127         | 13          | 42            | 27             | 107          |
| 170721       | Papln       | 19         | 3            | 20            | 55          | 19          | 4             | 23             | 39           |
| 170722       | Nxf7        | 4          | 2            | 26            | 20          | 4           | 3             | 30             | 23           |
| 170725       | Capn8       | 8          | 2            | 27            | 36          | 8           | 3             | 29             | 55           |
| 170728       | Rtn4ip1     | 57         | 42           | 58            | 331         | 93          | 73            | 102            | 623          |
| 170729       | Scrt1       | 8          | 30           | 30            | 76          | 7           | 17            | 27             | 75           |
| 170731       | Mfn2        | 82         | 287          | 911           | 588         | 102         | 356           | 1038           | 676          |
| 170732       | Trhr2       | 18         | 8            | 31            | 32          | 15          | 8             | 31             | 24           |
| 170733       | Klra17      | 4          | 2            | 24            | 34          | 4           | 3             | 26             | 31           |
| 170734       | Zfp371      | 7          | 3            | 21            | 62          | 7           | 3             | 18             | 60           |
| 170735       | Arr3        | 5          | 2            | 29            | 17          | 5           | 3             | 27             | 18           |
| 170736       | Parvb       | 7          | 6            | 25            | 44          | 7           | 9             | 27             | 62           |
| 170737       | Znrf1       | 522        | 3922         | 212           | 7855        | 73          | 560           | 42             | 1495         |
| 170738       | Kcnh7       | 6          | 2            | 47            | 28          | 6           | 3             | 49             | 19           |
| 170742       | Sertad3     | 35         | 462          | 186           | 147         | 30          | 348           | 124            | 76           |
| 170743       | Tlr7        | 10         | 51           | 86            | 37          | 48          | 287           | 389            | 205          |
| 170744       | Tlr8        | 4          | 2            | 27            | 14          | 4           | 3             | 30             | 20           |
| 170745       | Xpnpep2     | 6          | 2            | 22            | 47          | 6           | 3             | 25             | 49           |
| 170748       | Bc017612    | 13         | 144          | 136           | 203         | 11          | 47            | 50             | 164          |
| 170749       | Mtmr4       | 70         | 739          | 41            | 647         | 130         | 1472          | 59             | 904          |
| 170750       | Xpnpep1     | 93         | 69           | 738           | 202         | 104         | 78            | 884            | 170          |
| 170752       | Bcdo2       | 5          | 4            | 32            | 256         | 5           | 7             | 33             | 891          |
| 170755       | Sgk3        | 108        | 68           | 187           | 2864        | 113         | 89            | 212            | 3085         |
| 170756       | Slc24a6     | 33         | 46           | 201           | 213         | 44          | 122           | 330            | 337          |
| 170757       | Eltld1      | 5          | 3            | 26            | 18          | 6           | 3             | 26             | 18           |
| 170758       | Rac3        | 15         | 112          | 29            | 43          | 16          | 96            | 31             | 62           |
| 170760       | Acbd3       | 168        | 499          | 554           | 2206        | 169         | 473           | 632            | 2168         |
| 170762       | Nup155      | 64         | 220          | 49            | 1863        | 65          | 294           | 58             | 2169         |
| 170767       | Rfxap       | 53         | 626          | 265           | 12670       | 43          | 372           | 178            | 8702         |
| 170768       | Pfkfb3      | 81         | 672          | 236           | 977         | 80          | 582           | 227            | 1305         |
| 170770       | Bbc3        | 19         | 916          | 37            | 169         | 15          | 317           | 32             | 107          |
| 170771       | Khdrbs2     | 5          | 24           | 24            | 19          | 4           | 28            | 29             | 20           |
| 170772       | Glcci1      | 87         | 924          | 201           | 3103        | 132         | 2192          | 346            | 4745         |
| 170779       | Cd209d      | 5          | 2            | 18            | 47          | 5           | 3             | 24             | 49           |
| 170780       | Cd209e      | 6          | 4            | 30            | 18          | 5           | 3             | 25             | 14           |
| 170786       | Cd209a      | 6          | 3            | 24            | 15          | 6           | 4             | 25             | 149          |
| 170787       | Hdac10      | 52         | 668          | 169           | 485         | 116         | 1720          | 368            | 1315         |
| 170788       | Crb1        | 6          | 3            | 26            | 62          | 6           | 3             | 25             | 41           |

| NCBI Gene ID | Gene Symbol | Affy. CD4+ | Agilent CD4+ | Illumina CD4+ | Nimbl. CD4+ | Affy. CD19+ | Agilent CD19+ | Illumina CD19+ | Nimbl. CD19+ |
|--------------|-------------|------------|--------------|---------------|-------------|-------------|---------------|----------------|--------------|
| 170790       | Mlc1        | 9          | 2            | 28            | 40          | 10          | 2             | 25             | 40           |
| 170799       | Plekhk1     | 6          | 22           | 34            | 148         | 6           | 22            | 35             | 165          |
| 170813       | Ms4a3       | 8          | 10           | 31            | 56          | 7           | 9             | 32             | 51           |
| 170822       | Usp33       | 134        | 293          | 32            | 28          | 131         | 249           | 31             | 27           |
| 170823       | Glmn        | 26         | 26           | 27            | 245         | 32          | 42            | 22             | 350          |
| 170826       | Ppargc1b    | 43         | 206          | 271           | 1987        | 31          | 103           | 161            | 1878         |
| 170828       | Vgll1       | 11         | 10           | 22            | 39          | 11          | 17            | 27             | 47           |
| 170829       | Tram2       | 35         | 58           | 30            | 26          | 42          | 47            | 31             | 31           |
| 170833       | Hook2       | 15         | 288          | 46            | 422         | 15          | 356           | 59             | 786          |
| 170834       | Oosp1       | 5          | 4            | 24            | 16          | 5           | 47            | 130            | 678          |
| 170835       | Pib5pa      | 10         | 6            | 26            | 55          | 9           | 9             | 28             | 70           |
| 170930       | Sumo2       | 522        | 2605         | 2336          | 8189        | 559         | 3224          | 2458           | 8793         |
| 170935       | Grid2ip     | 9          | 9            | 126           | 30          | 8           | 8             | 122            | 32           |
| 170936       | Zfp369      | 101        | 67           | 31            | 6015        | 92          | 64            | 36             | 4935         |
| 170939       | Ay026312    | 5          | 9            | 23            | 16          | 5           | 10            | 24             | 22           |
| 170947       | Myoz3       | 19         | 20           | 23            | 22          | 16          | 22            | 25             | 41           |
| 170952       | Prima1      | 7          | 15           | 38            | 66          | 7           | 10            | 36             | 97           |
| 171095       | Il17rc      | 22         | 35           | 25            | 65          | 23          | 21            | 22             | 74           |
| 171166       | Mcoln3      | 18         | 48           | 65            | 68          | 29          | 97            | 88             | 102          |
| 171167       | Fut10       | 6          | 16           | 34            | 81          | 5           | 11            | 35             | 45           |
| 171168       | Asah3       | 6          | 5            | 22            | 18          | 6           | 5             | 24             | 28           |
| 171170       | Mbnl3       | 57         | 15           | 37            | 515         | 59          | 21            | 33             | 789          |
| 171171       | Ntng2       | 23         | 5            | 24            | 51          | 22          | 3             | 23             | 45           |
| 171180       | Syt12       | 5          | 13           | 34            | 41          | 5           | 14            | 35             | 41           |
| 171183       | V1rc10      | 4          | 6            | 26            | 32          | 4           | 10            | 27             | 43           |
| 171185       | V1rc12      | 4          | 2            | 23            | 36          | 4           | 3             | 23             | 28           |
| 171186       | V1rc13      | 4          | 2            | 26            | 26          | 4           | 3             | 27             | 33           |
| 171187       | V1rc14      | 4          | 3            | 34            | 15          | 4           | 3             | 30             | 13           |
| 171188       | V1rc15      | 4          | 2            | 22            | 20          | 4           | 3             | 20             | 24           |
| 171189       | V1rc16      | 4          | 2            | 22            | 79          | 4           | 3             | 25             | 108          |
| 171190       | V1rc17      | 5          | 2            | 20            | 30          | 4           | 4             | 21             | 29           |
| 171191       | V1rc18      | 6          | 2            | 23            | 21          | 6           | 3             | 28             | 20           |
| 171192       | V1rc19      | 4          | 3            | 21            | 14          | 4           | 3             | 30             | 15           |
| 171193       | V1rc20      | 4          | 4            | 33            | 18          | 4           | 7             | 31             | 20           |
| 171195       | V1rc22      | 4          | 2            | 28            | 20          | 4           | 3             | 28             | 20           |
| 171196       | V1rc23      | 3          | 6            | 21            | 46          | 3           | 7             | 25             | 55           |
| 171197       | V1rc24      | 4          | 3            | 29            | 22          | 4           | 3             | 27             | 26           |
| 171198       | V1rc25      | 4          | 15           | 32            | 17          | 4           | 11            | 32             | 20           |
| 171199       | V1rc26      | 4          | 8            | 19            | 72          | 4           | 12            | 23             | 91           |
| 171200       | V1rc27      | 4          | 2            | 23            | 18          | 5           | 3             | 24             | 39           |
| 171201       | V1rc28      | 4          | 3            | 26            | 17          | 4           | 5             | 26             | 17           |
| 171202       | V1rc29      | 4          | 3            | 19            | 24          | 4           | 4             | 21             | 34           |
| 171205       | V1rc32      | 5          | 2            | 64            | 21          | 5           | 3             | 58             | 25           |
| 171206       | V1rc33      | 5          | 7            | 27            | 16          | 5           | 5             | 30             | 16           |
| 171207       | Arhgap4     | 558        | 3085         | 2556          | 2092        | 533         | 2783          | 2408           | 2195         |
| 171209       | Accn3       | 9          | 7            | 30            | 72          | 9           | 5             | 26             | 93           |
| 171211       | Edaradd     | 11         | 2            | 28            | 77          | 54          | 67            | 154            | 3668         |
| 171212       | Galnt10     | 166        | 2070         | 1087          | 736         | 50          | 529           | 265            | 175          |
| 171224       | V1re1       | 5          | 10           | 22            | 21          | 5           | 12            | 25             | 18           |
| 171225       | V1re2       | 4          | 2            | 29            | 16          | 4           | 5             | 23             | 24           |
| 171226       | V1re3       | 4          | 9            | 24            | 19          | 4           | 7             | 23             | 20           |



| NCBI<br>Gene ID | Gene<br>Symbol | Affy.<br>CD4+ | Agilent<br>CD4+ | Illumina<br>CD4+ | Nimbl.<br>CD4+ | Affy.<br>CD19+ | Agilent<br>CD19+ | Illumina<br>CD19+ | Nimbl.<br>CD19+ |
|-----------------|----------------|---------------|-----------------|------------------|----------------|----------------|------------------|-------------------|-----------------|
| 171228          | V1re5          | 4             | 25              | 24               | 19             | 5              | 19               | 30                | 26              |
| 171229          | V1re6          | 5             | 21              | 30               | 16             | 4              | 18               | 30                | 20              |
| 171230          | V1re7          | 4             | 27              | 25               | 29             | 4              | 25               | 23                | 64              |
| 171231          | V1re8          | 4             | 24              | 23               | 18             | 5              | 15               | 23                | 28              |
| 171232          | V1rf1          | 4             | 2               | 23               | 59             | 4              | 3                | 27                | 56              |
| 171233          | V1rf2          | 4             | 6               | 27               | 14             | 5              | 5                | 26                | 17              |
| 171234          | V1rf3          | 4             | 15              | 39               | 15             | 5              | 18               | 40                | 23              |
| 171235          | V1rf4          | 4             | 17              | 25               | 15             | 4              | 16               | 23                | 15              |
| 171236          | V1rf5          | 5             | 4               | 25               | 15             | 5              | 4                | 25                | 21              |
| 171237          | V1rg2          | 5             | 12              | 28               | 18             | 6              | 4                | 31                | 15              |
| 171238          | V1rg3          | 5             | 18              | 20               | 25             | 4              | 17               | 21                | 28              |
| 171239          | V1rg4          | 4             | 11              | 19               | 20             | 4              | 14               | 19                | 18              |
| 171240          | V1rg5          | 5             | 3               | 25               | 27             | 6              | 3                | 26                | 50              |
| 171241          | V1rg6          | 9             | 8               | 25               | 22             | 8              | 6                | 28                | 29              |
| 171242          | V1rg7          | 4             | 12              | 27               | 15             | 4              | 16               | 30                | 25              |
| 171243          | V1rg8          | 6             | 2               | 22               | 15             | 5              | 3                | 25                | 18              |
| 171244          | V1rg9          | 4             | 9               | 27               | 16             | 4              | 8                | 31                | 14              |
| 171245          | V1rh1          | 4             | 42              | 52               | 21             | 4              | 45               | 45                | 69              |
| 171246          | V1rh3          | 4             | 2               | 27               | 19             | 4              | 3                | 22                | 16              |
| 171247          | V1rh4          | 4             | 16              | 32               | 23             | 4              | 19               | 29                | 29              |
| 171248          | V1rh5          | 4             | 2               | 24               | 26             | 4              | 3                | 22                | 28              |
| 171250          | V1rh7          | 5             | 5               | 28               | 18             | 4              | 16               | 27                | 21              |
| 171251          | V1rh8          | 4             | 5               | 22               | 37             | 4              | 4                | 25                | 43              |
| 171252          | V1rh9          | 5             | 3               | 22               | 54             | 5              | 6                | 24                | 42              |
| 171253          | V1ri2          | 4             | 3               | 18               | 21             | 4              | 4                | 21                | 19              |
| 171254          | V1ri3          | 4             | 3               | 23               | 41             | 4              | 3                | 24                | 54              |
| 171255          | V1ri4          | 4             | 86              | 24               | 16             | 4              | 78               | 25                | 31              |
| 171256          | V1ri5          | 5             | 10              | 21               | 14             | 4              | 6                | 27                | 17              |
| 171257          | V1ri6          | 5             | 40              | 28               | 43             | 5              | 32               | 28                | 41              |
| 171258          | V1ri7          | 5             | 5               | 22               | 20             | 5              | 8                | 25                | 16              |
| 171260          | V1rj2          | 4             | 19              | 19               | 16             | 5              | 20               | 19                | 18              |
| 171261          | V1rk1          | 4             | 4               | 34               | 30             | 4              | 8                | 29                | 38              |
| 171262          | V1rl1          | 4             | 2               | 25               | 16             | 4              | 3                | 25                | 16              |
| 171264          | V1re11         | 4             | 14              | 25               | 18             | 4              | 17               | 23                | 18              |
| 171265          | V1re12         | 4             | 49              | 27               | 18             | 4              | 40               | 25                | 16              |
| 171267          | V1rg11         | 4             | 3               | 24               | 39             | 4              | 3                | 28                | 39              |
| 171268          | V1rg12         | 5             | 10              | 23               | 17             | 5              | 6                | 24                | 26              |
| 171269          | V1rh10         | 4             | 3               | 28               | 15             | 4              | 3                | 26                | 14              |
| 171270          | V1rh11         | 4             | 2               | 25               | 44             | 4              | 3                | 27                | 40              |
| 171271          | V1rh12         | 4             | 2               | 26               | 17             | 4              | 2                | 26                | 17              |
| 171272          | V1rh13         | 4             | 2               | 32               | 18             | 4              | 3                | 32                | 27              |
| 171273          | V1rh14         | 7             | 2               | 23               | 18             | 6              | 2                | 22                | 21              |
| 171275          | V1rh18         | 4             | 11              | 25               | 23             | 5              | 21               | 26                | 17              |
| 171277          | V1rh20         | 5             | 2               | 22               | 16             | 5              | 3                | 25                | 16              |
| 171279          | V1ri10         | 4             | 36              | 44               | 16             | 5              | 46               | 39                | 19              |
| 171283          | Havcr1         | 6             | 8               | 27               | 14             | 8              | 19               | 34                | 159             |
| 171284          | Timd2          | 4             | 7               | 24               | 23             | 5              | 7                | 36                | 82              |
| 171285          | Havcr2         | 4             | 3               | 27               | 26             | 4              | 3                | 25                | 39              |
| 171286          | Slc12a8        | 13            | 6               | 33               | 17             | 15             | 6                | 35                | 18              |
| 171382          | Trpm8          | 6             | 2               | 31               | 21             | 6              | 2                | 32                | 32              |
| 171388          | Bnpl           | 8             | 6               | 34               | 88             | 7              | 5                | 37                | 90              |

| NCBI Gene ID | Gene Symbol | Affy. CD4+ | Agilent CD4+ | Illumina CD4+ | Nimbl. CD4+ | Affy. CD19+ | Agilent CD19+ | Illumina CD19+ | Nimbl. CD19+ |
|--------------|-------------|------------|--------------|---------------|-------------|-------------|---------------|----------------|--------------|
| 171429       | Slc26a6     | 15         | 98           | 125           | 327         | 13          | 55            | 59             | 148          |
| 171463       | Il17rd      | 9          | 205          | 27            | 82          | 8           | 233           | 32             | 55           |
| 171469       | Gpr37l1     | 7          | 25           | 24            | 33          | 8           | 24            | 28             | 24           |
| 171504       | Apob48r     | 25         | 103          | 43            | 203         | 21          | 7             | 35             | 42           |
| 171506       | H1foo       | 7          | 91           | 21            | 43          | 7           | 69            | 20             | 71           |
| 171508       | Creld1      | 22         | 40           | 58            | 672         | 24          | 85            | 95             | 1224         |
| 171531       | Mlph        | 22         | 3            | 36            | 70          | 20          | 5             | 34             | 101          |
| 171543       | Bmf         | 27         | 126          | 41            | 155         | 73          | 752           | 140            | 926          |
| 171567       | Nme7        | 30         | 55           | 2587          | 1491        | 27          | 51            | 791            | 1032         |
| 191578       | Hel308      | 43         | 59           | 67            | 468         | 47          | 64            | 67             | 396          |
| 192113       | Atp12a      | 9          | 22           | 28            | 68          | 10          | 17            | 29             | 155          |
| 192119       | Dicer1      | 165        | 273          | 132           | 1242        | 164         | 148           | 114            | 836          |
| 192120       | Bspry       | 10         | 10           | 23            | 47          | 11          | 77            | 36             | 205          |
| 192140       | Tmc2        | 6          | 60           | 22            | 17          | 6           | 51            | 21             | 17           |
| 192156       | Mvd         | 25         | 249          | 83            | 387         | 24          | 146           | 50             | 258          |
| 192157       | Socs7       | 60         | 6            | 25            | 63          | 78          | 9             | 26             | 58           |
| 192159       | Prpf8       | 362        | 1314         | 1222          | 14164       | 408         | 1302          | 1170           | 13018        |
| 192160       | Casc3       | 83         | 89           | 1287          | 4479        | 77          | 63            | 952            | 3001         |
| 192166       | Sardh       | 11         | 23           | 44            | 117         | 10          | 5             | 33             | 108          |
| 192167       | Nlgn1       | 5          | 9            | 25            | 23          | 4           | 9             | 22             | 29           |
| 192169       | 310047c23r  | 48         | 400          | 99            | 699         | 79          | 481           | 127            | 905          |
| 192173       | Bc003940    | 122        | 484          | 1267          | 2752        | 121         | 476           | 1266           | 2947         |
| 192187       | Stab1       | 10         | 10           | 26            | 85          | 10          | 8             | 22             | 113          |
| 192188       | Stab2       | 9          | 35           | 30            | 62          | 9           | 37            | 32             | 89           |
| 192190       | Pkhd1l1     | 5          | 4            | 26            | 16          | 5           | 4             | 28             | 15           |
| 192192       | Shkbp1      | 79         | 713          | 226           | 252         | 92          | 851           | 230            | 334          |
| 192193       | Edem1       | 272        | 1110         | 34            | 6414        | 173         | 842           | 31             | 3329         |
| 192194       | Butr1       | 9          | 7            | 29            | 34          | 9           | 12            | 28             | 31           |
| 192195       | Ash1l       | 293        | 79           | 399           | 7229        | 377         | 120           | 497            | 9398         |
| 192196       | Luc7l2      | 498        | 816          | 924           | 2200        | 575         | 651           | 1030           | 1952         |
| 192197       | Bcas3       | 76         | 123          | 882           | 287         | 66          | 90            | 629            | 235          |
| 192198       | Lrrc4       | 16         | 2            | 19            | 18          | 16          | 3             | 20             | 24           |
| 192212       | Prom2       | 9          | 2            | 36            | 62          | 8           | 4             | 34             | 69           |
| 192232       | Hps4        | 32         | 1028         | 142           | 233         | 54          | 1767          | 178            | 464          |
| 192236       | Hps1        | 46         | 147          | 367           | 412         | 51          | 139           | 356            | 435          |
| 192650       | Cabp7       | 16         | 2            | 22            | 40          | 14          | 4             | 23             | 37           |
| 192654       | Lypla3      | 26         | 42           | 160           | 88          | 33          | 133           | 340            | 189          |
| 192656       | Ripk2       | 71         | 10           | 82            | 109         | 115         | 13            | 123            | 119          |
| 192657       | Ell2        | 15         | 15           | 28            | 259         | 45          | 182           | 35             | 2596         |
| 192658       | Rfpl4       | 5          | 4            | 25            | 21          | 5           | 3             | 27             | 22           |
| 192662       | Arhgdia     | 481        | 1606         | 82            | 576         | 511         | 1652          | 65             | 451          |
| 192663       | Abcg4       | 17         | 19           | 26            | 75          | 16          | 18            | 20             | 59           |
| 192678       | Rassf3      | 100        | 86           | 655           | 243         | 119         | 132           | 808            | 284          |
| 192734       | Ai646023    | 26         | 70           | 96            | 95          | 22          | 3             | 34             | 34           |
| 192786       | Rapgef6     | 590        | 1302         | 106           | 14236       | 305         | 494           | 57             | 6815         |
| 192897       | Itgb4       | 14         | 28           | 34            | 70          | 14          | 26            | 29             | 87           |
| 193053       | Olfir386    | 5          | 3            | 19            | 18          | 5           | 3             | 16             | 15           |
| 193322       | Oog1        | 4          | 3            | 22            | 19          | 4           | 3             | 24             | 29           |
| 193385       | 330500d04r  | 569        | 793          | 2107          | 7516        | 472         | 450           | 1861           | 5914         |
| 193740       | Hspa1a      | 77         | 545          | 45            | 2037        | 53          | 131           | 31             | 1208         |
| 193742       | Bat5        | 69         | 156          | 903           | 148         | 64          | 175           | 731            | 187          |

| NCBI Gene ID | Gene Symbol | Affy. CD4+ | Agilent CD4+ | Illumina CD4+ | Nimbl. CD4+ | Affy. CD19+ | Agilent CD19+ | Illumina CD19+ | Nimbl. CD19+ |
|--------------|-------------|------------|--------------|---------------|-------------|-------------|---------------|----------------|--------------|
| 193796       | Jmjd2b      | 99         | 217          | 83            | 179         | 84          | 177           | 75             | 207          |
| 193813       | Mcfcd2      | 32         | 495          | 29            | 1665        | 26          | 495           | 24             | 1227         |
| 194268       | 930104I06r  | 26         | 25           | 28            | 267         | 31          | 35            | 28             | 302          |
| 194352       | Trpv5       | 7          | 3            | 25            | 24          | 7           | 3             | 27             | 22           |
| 194401       | Mical3      | 67         | 17           | 22            | 142         | 43          | 8             | 22             | 104          |
| 194590       | Reps2       | 5          | 2            | 28            | 24          | 6           | 3             | 29             | 25           |
| 194908       | 333433k01r  | 21         | 45           | 55            | 671         | 18          | 33            | 50             | 478          |
| 194974       | Sunc1       | 5          | 3            | 21            | 19          | 4           | 3             | 30             | 21           |
| 195040       | Ai316787    | 16         | 110          | 484           | 250         | 20          | 164           | 692            | 379          |
| 195646       | Hs3st2      | 19         | 2            | 26            | 55          | 19          | 5             | 26             | 47           |
| 195772       | Magea9      | 5          | 33           | 34            | 19          | 5           | 32            | 32             | 16           |
| 207181       | Rbms3       | 8          | 4            | 22            | 106         | 8           | 3             | 25             | 113          |
| 207182       | Ggtl3       | 14         | 38           | 31            | 73          | 11          | 16            | 19             | 38           |
| 207212       | Arhgef17    | 9          | 6            | 32            | 27          | 8           | 8             | 29             | 29           |
| 207213       | Tdpoz1      | 7          | 7            | 32            | 19          | 7           | 8             | 24             | 20           |
| 207215       | Fbxo40      | 19         | 14           | 37            | 36          | 22          | 14            | 34             | 28           |
| 207227       | Stxbp5l     | 5          | 2            | 22            | 20          | 5           | 3             | 16             | 17           |
| 207278       | Fchsd2      | 153        | 236          | 698           | 529         | 738         | 919           | 3019           | 2195         |
| 207352       | Sec23ip     | 152        | 416          | 120           | 828         | 138         | 283           | 101            | 594          |
| 207375       | Orf34       | 35         | 2            | 32            | 22          | 43          | 3             | 42             | 30           |
| 207474       | Kctd12b     | 6          | 19           | 37            | 62          | 6           | 3             | 28             | 17           |
| 207521       | Dtx4        | 20         | 77           | 20            | 91          | 21          | 145           | 30             | 97           |
| 207565       | Camkk2      | 50         | 331          | 63            | 191         | 52          | 395           | 68             | 355          |
| 207615       | Wdr37       | 160        | 182          | 54            | 1931        | 128         | 128           | 46             | 1183         |
| 207683       | Igsf11      | 20         | 2            | 25            | 17          | 20          | 3             | 26             | 19           |
| 207728       | Pde2a       | 49         | 131          | 90            | 136         | 102         | 217           | 200            | 220          |
| 207777       | Bzap1       | 12         | 123          | 64            | 104         | 13          | 203           | 94             | 134          |
| 207818       | Bc004728    | 43         | 55           | 44            | 137         | 68          | 671           | 355            | 1807         |
| 207839       | Galnt6      | 139        | 2426         | 126           | 1789        | 21          | 251           | 31             | 586          |
| 207921       | 830093i24r  | 5          | 8            | 33            | 43          | 5           | 10            | 32             | 44           |
| 208076       | Pknox2      | 7          | 40           | 34            | 24          | 6           | 66            | 26             | 26           |
| 208079       | 530053g22r  | 4          | 2            | 19            | 42          | 4           | 3             | 20             | 50           |
| 208098       | Panx3       | 7          | 2            | 37            | 31          | 6           | 3             | 33             | 32           |
| 208144       | Dhx37       | 84         | 52           | 155           | 64          | 109         | 62            | 132            | 58           |
| 208171       | Tmprss7     | 5          | 11           | 23            | 33          | 5           | 10            | 22             | 37           |
| 208177       | Phldb2      | 5          | 21           | 19            | 23          | 5           | 21            | 27             | 23           |
| 208188       | Ghsr        | 15         | 29           | 38            | 22          | 18          | 31            | 34             | 22           |
| 208194       | Endogl1     | 31         | 51           | 222           | 930         | 25          | 32            | 164            | 1206         |
| 208198       | Btbd2       | 61         | 296          | 109           | 71          | 63          | 299           | 84             | 90           |
| 208211       | Alg1        | 87         | 1290         | 173           | 1012        | 82          | 1295          | 143            | 728          |
| 208266       | Dot1l       | 126        | 49           | 146           | 2540        | 126         | 31            | 118            | 2666         |
| 208366       | Rpp40       | 10         | 16           | 35            | 72          | 9           | 13            | 37             | 58           |
| 208372       | Asb18       | 13         | 21           | 32            | 108         | 12          | 18            | 28             | 41           |
| 208583       | Nek11       | 5          | 7            | 32            | 34          | 5           | 6             | 33             | 29           |
| 208624       | Alg3        | 83         | 96           | 238           | 310         | 83          | 76            | 190            | 246          |
| 208628       | Kntc1       | 6          | 12           | 38            | 28          | 7           | 25            | 46             | 33           |
| 208643       | Eif4g1      | 397        | 606          | 709           | 2180        | 383         | 404           | 579            | 1674         |
| 208647       | Creb3l2     | 13         | 123          | 25            | 158         | 14          | 115           | 22             | 241          |
| 208650       | Cblb        | 313        | 38           | 1332          | 639         | 301         | 34            | 1270           | 484          |
| 208665       | Akr1d1      | 5          | 2            | 24            | 17          | 5           | 3             | 27             | 22           |
| 208666       | Diras1      | 12         | 27           | 30            | 27          | 11          | 15            | 27             | 22           |

| NCBI Gene ID | Gene Symbol | Affy. CD4+ | Agilent CD4+ | Illumina CD4+ | Nimbl. CD4+ | Affy. CD19+ | Agilent CD19+ | Illumina CD19+ | Nimbl. CD19+ |
|--------------|-------------|------------|--------------|---------------|-------------|-------------|---------------|----------------|--------------|
| 208677       | Creb3l3     | 8          | 523          | 24            | 34          | 8           | 795           | 24             | 49           |
| 208691       | Eif5a2      | 12         | 205          | 26            | 139         | 11          | 125           | 29             | 83           |
| 208715       | Hmgcs1      | 75         | 994          | 1750          | 5004        | 67          | 739           | 1298           | 3306         |
| 208760       | Aqp12       | 11         | 3            | 28            | 67          | 12          | 3             | 26             | 115          |
| 208777       | Sned1       | 9          | 6            | 27            | 42          | 9           | 4             | 41             | 67           |
| 208846       | Daam1       | 42         | 99           | 195           | 364         | 12          | 26            | 59             | 56           |
| 208869       | Dock3       | 6          | 15           | 35            | 35          | 5           | 18            | 28             | 39           |
| 208884       | Zdhhc9      | 56         | 308          | 200           | 42          | 52          | 238           | 161            | 62           |
| 208890       | Slc26a7     | 6          | 2            | 21            | 17          | 6           | 3             | 25             | 17           |
| 208898       | Unc13c      | 11         | 2            | 26            | 25          | 11          | 3             | 24             | 39           |
| 208922       | Cpeb3       | 6          | 9            | 27            | 108         | 6           | 7             | 25             | 75           |
| 208936       | Adamts18    | 9          | 27           | 31            | 25          | 8           | 24            | 29             | 21           |
| 208943       | Myo5c       | 7          | 5            | 37            | 48          | 6           | 4             | 29             | 58           |
| 208967       | Thnsl1      | 12         | 43           | 22            | 334         | 10          | 44            | 24             | 299          |
| 208968       | Suhw3       | 55         | 106          | 126           | 225         | 45          | 59            | 111            | 131          |
| 208982       | Hmgcll1     | 5          | 9            | 28            | 18          | 7           | 9             | 31             | 93           |
| 208990       | Npb         | 17         | 43           | 72            | 119         | 14          | 14            | 40             | 71           |
| 209003       | Rbmx2       | 59         | 50           | 42            | 1431        | 60          | 40            | 42             | 1151         |
| 209011       | Sirt7       | 176        | 5283         | 4490          | 10937       | 150         | 4793          | 3762           | 9409         |
| 209027       | Pycr1       | 8          | 8            | 34            | 132         | 7           | 7             | 28             | 170          |
| 209039       | Tenc1       | 9          | 13           | 56            | 45          | 9           | 12            | 55             | 55           |
| 209091       | Ccnb3       | 4          | 3            | 38            | 18          | 4           | 3             | 36             | 33           |
| 209195       | Clic6       | 5          | 3            | 27            | 28          | 5           | 3             | 27             | 33           |
| 209232       | Wfdc5       | 12         | 19           | 42            | 48          | 10          | 17            | 34             | 49           |
| 209239       | Gan         | 48         | 16           | 45            | 415         | 40          | 12            | 43             | 234          |
| 209268       | Igsf1       | 5          | 13           | 29            | 29          | 5           | 15            | 29             | 23           |
| 209318       | Gps1        | 125        | 1603         | 1206          | 2590        | 151         | 1937          | 1331           | 3532         |
| 209354       | Eif2b1      | 46         | 536          | 279           | 3651        | 49          | 410           | 228            | 3038         |
| 209357       | Gtf2h3      | 53         | 266          | 589           | 237         | 63          | 314           | 683            | 177          |
| 209361       | Taf3        | 100        | 67           | 103           | 425         | 81          | 58            | 85             | 179          |
| 209378       | Itih5       | 15         | 189          | 38            | 173         | 11          | 95            | 28             | 70           |
| 209446       | Tcfe3       | 42         | 55           | 150           | 231         | 39          | 67            | 168            | 232          |
| 209448       | Hoxc10      | 7          | 2            | 35            | 55          | 7           | 3             | 31             | 65           |
| 209456       | Trp53bp2    | 95         | 207          | 133           | 277         | 71          | 122           | 77             | 184          |
| 209462       | Hace1       | 65         | 169          | 368           | 268         | 38          | 84            | 231            | 130          |
| 209478       | Tbc1d12     | 11         | 6            | 22            | 909         | 13          | 4             | 19             | 944          |
| 209488       | Hsh2d       | 35         | 160          | 40            | 208         | 58          | 470           | 63             | 394          |
| 209558       | Enpp3       | 5          | 10           | 37            | 48          | 5           | 12            | 38             | 45           |
| 209590       | Il23r       | 4          | 2            | 19            | 39          | 4           | 3             | 21             | 31           |
| 209630       | Frmd4a      | 10         | 7            | 47            | 293         | 11          | 5             | 41             | 139          |
| 209692       | Dhtkd1      | 7          | 36           | 26            | 62          | 7           | 31            | 28             | 133          |
| 209743       | Af529169    | 8          | 2            | 26            | 26          | 8           | 3             | 27             | 28           |
| 209760       | Tmc7        | 7          | 14           | 26            | 31          | 9           | 18            | 54             | 167          |
| 209837       | Slc38a5     | 8          | 5            | 27            | 17          | 8           | 4             | 25             | 14           |
| 209966       | Pgbd5       | 9          | 3            | 19            | 45          | 8           | 3             | 17             | 39           |
| 210009       | Mtrr        | 41         | 20           | 73            | 377         | 37          | 18            | 67             | 302          |
| 210027       | Slc35f3     | 7          | 17           | 20            | 30          | 7           | 13            | 23             | 31           |
| 210044       | Adcy2       | 6          | 3            | 29            | 58          | 6           | 3             | 28             | 63           |
| 210106       | Pols        | 64         | 220          | 210           | 358         | 60          | 156           | 161            | 263          |
| 210126       | Lpp         | 91         | 207          | 320           | 326         | 117         | 239           | 558            | 333          |
| 210135       | Zfp180      | 96         | 413          | 889           | 1560        | 90          | 299           | 707            | 1193         |

| NCBI Gene ID | Gene Symbol | Affy. CD4+ | Agilent CD4+ | Illumina CD4+ | Nimbl. CD4+ | Affy. CD19+ | Agilent CD19+ | Illumina CD19+ | Nimbl. CD19+ |
|--------------|-------------|------------|--------------|---------------|-------------|-------------|---------------|----------------|--------------|
| 210148       | Slc30a6     | 37         | 39           | 400           | 4973        | 33          | 49            | 356            | 4694         |
| 210172       | Zfp526      | 37         | 20           | 40            | 77          | 31          | 17            | 39             | 64           |
| 210198       | Gprc6a      | 7          | 12           | 26            | 27          | 7           | 15            | 23             | 23           |
| 210297       | Lrch2       | 4          | 3            | 27            | 53          | 4           | 3             | 25             | 47           |
| 210356       | 30049g20r   | 6          | 4            | 33            | 21          | 6           | 4             | 29             | 24           |
| 210376       | Mtmr9       | 72         | 71           | 76            | 297         | 73          | 85            | 78             | 275          |
| 210510       | Tdrd6       | 5          | 8            | 21            | 38          | 5           | 5             | 18             | 23           |
| 210530       | Leprel1     | 6          | 5            | 33            | 26          | 6           | 6             | 32             | 38           |
| 210554       | Hus1b       | 34         | 10           | 28            | 136         | 32          | 9             | 27             | 101          |
| 210622       | 30002g05r   | 7          | 3            | 40            | 33          | 7           | 3             | 44             | 24           |
| 210710       | Gab3        | 48         | 178          | 455           | 1602        | 34          | 117           | 320            | 767          |
| 210741       | Kcnk12      | 19         | 15           | 23            | 73          | 20          | 21            | 28             | 63           |
| 210789       | Tbc1d4      | 15         | 30           | 43            | 683         | 8           | 9             | 43             | 19           |
| 210801       | Unc5d       | 7          | 8            | 25            | 53          | 7           | 7             | 25             | 35           |
| 210933       | Bai3        | 4          | 5            | 27            | 17          | 4           | 9             | 26             | 19           |
| 210973       | Kbtbd2      | 112        | 172          | 770           | 3594        | 91          | 125           | 625            | 2359         |
| 211007       | Trim41      | 58         | 187          | 332           | 265         | 66          | 220           | 388            | 262          |
| 211039       | Bc016548    | 5          | 4            | 19            | 22          | 5           | 4             | 23             | 18           |
| 211134       | Lzts1       | 21         | 6            | 21            | 58          | 12          | 5             | 19             | 34           |
| 211151       | Churc1      | 63         | 2324         | 85            | 7410        | 46          | 1219          | 63             | 5077         |
| 211228       | Lrrc25      | 6          | 6            | 28            | 50          | 9           | 37            | 32             | 64           |
| 211253       | Mtrf1       | 7          | 47           | 50            | 206         | 8           | 92            | 82             | 293          |
| 211286       | Cln5        | 52         | 399          | 771           | 1346        | 57          | 441           | 1025           | 1386         |
| 211323       | Nrg1        | 5          | 8            | 26            | 49          | 6           | 6             | 32             | 64           |
| 211347       | Pank3       | 89         | 14           | 57            | 428         | 85          | 11            | 52             | 267          |
| 211389       | Suox        | 24         | 844          | 520           | 1004        | 16          | 437           | 263            | 513          |
| 211401       | Mtss1       | 105        | 1391         | 127           | 255         | 260         | 2736          | 235            | 318          |
| 211429       | Pla2g4b     | 27         | 305          | 134           | 450         | 31          | 422           | 204            | 857          |
| 211468       | Kcnh8       | 7          | 2            | 19            | 28          | 5           | 3             | 21             | 59           |
| 211480       | Kcnj14      | 15         | 2            | 35            | 34          | 12          | 3             | 33             | 31           |
| 211484       | Tsga10      | 7          | 10           | 32            | 55          | 7           | 13            | 38             | 88           |
| 211550       | T2bp        | 6          | 4            | 25            | 23          | 52          | 222           | 134            | 148          |
| 211556       | Bc002199    | 117        | 28           | 894           | 1472        | 126         | 35            | 935            | 1362         |
| 211577       | Mrgprf      | 12         | 5            | 24            | 24          | 10          | 5             | 32             | 48           |
| 211612       | Ptchd1      | 7          | 24           | 28            | 26          | 8           | 26            | 31             | 18           |
| 211623       | Plac9       | 17         | 13           | 23            | 94          | 14          | 11            | 25             | 75           |
| 211651       | Fancd2      | 7          | 6            | 37            | 34          | 7           | 5             | 50             | 44           |
| 211666       | Mgst2       | 173        | 3136         | 1447          | 10930       | 55          | 650           | 393            | 3893         |
| 211712       | Pcdh9       | 7          | 5            | 31            | 20          | 6           | 6             | 26             | 26           |
| 211770       | Trib1       | 28         | 36           | 30            | 512         | 31          | 79            | 32             | 919          |
| 211924       | Dsg1c       | 5          | 8            | 21            | 23          | 6           | 9             | 19             | 26           |
| 211948       | 30028b21r   | 48         | 76           | 148           | 2250        | 47          | 62            | 123            | 1971         |
| 211978       | Zfyve26     | 73         | 177          | 426           | 346         | 106         | 326           | 652            | 562          |
| 211986       | Tmem18      | 35         | 303          | 33            | 1451        | 28          | 260           | 34             | 1020         |
| 212032       | Hk3         | 7          | 18           | 42            | 53          | 8           | 22            | 44             | 57           |
| 212073       | 831426i19r  | 27         | 35           | 33            | 69          | 52          | 118           | 45             | 212          |
| 212108       | Rln3        | 25         | 13           | 41            | 118         | 19          | 10            | 24             | 142          |
| 212111       | Inpp5a      | 52         | 112          | 116           | 1008        | 71          | 131           | 144            | 1638         |
| 212127       | 810046l04r  | 90         | 50           | 219           | 336         | 96          | 47            | 209            | 441          |
| 212167       | 530088i07r  | 27         | 24           | 34            | 307         | 34          | 36            | 41             | 546          |
| 212168       | Zswim4      | 33         | 9            | 193           | 37          | 30          | 7             | 148            | 40           |

| NCBI Gene ID | Gene Symbol | Affy. CD4+ | Agilent CD4+ | Illumina CD4+ | Nimbl. CD4+ | Affy. CD19+ | Agilent CD19+ | Illumina CD19+ | Nimbl. CD19+ |
|--------------|-------------|------------|--------------|---------------|-------------|-------------|---------------|----------------|--------------|
| 212190       | Ubx3        | 6          | 5            | 25            | 89          | 6           | 6             | 22             | 89           |
| 212307       | Mapre2      | 53         | 164          | 251           | 269         | 104         | 220           | 344            | 378          |
| 212326       | Bc035537    | 6          | 6            | 25            | 29          | 7           | 6             | 19             | 36           |
| 212398       | Frat2       | 72         | 1062         | 24            | 2019        | 42          | 459           | 20             | 907          |
| 212439       | Aa986860    | 8          | 27           | 24            | 19          | 8           | 27            | 22             | 19           |
| 212503       | Paox        | 60         | 804          | 103           | 5966        | 44          | 454           | 80             | 3622         |
| 212518       | Sprn        | 8          | 41           | 39            | 17          | 8           | 43            | 40             | 18           |
| 212528       | Trmt1       | 131        | 1190         | 100           | 1871        | 173         | 1198          | 91             | 1746         |
| 212531       | Sh3bgrl2    | 8          | 13           | 37            | 50          | 9           | 17            | 29             | 48           |
| 212541       | Rho         | 7          | 12           | 35            | 20          | 6           | 4             | 33             | 21           |
| 212555       | Pqlc2       | 19         | 55           | 53            | 194         | 48          | 293           | 180            | 1009         |
| 212627       | Prpsap2     | 97         | 418          | 135           | 2596        | 141         | 411           | 166            | 3145         |
| 212647       | Aldh4a1     | 33         | 161          | 204           | 124         | 28          | 118           | 115            | 153          |
| 212670       | Catsper2    | 6          | 38           | 65            | 104         | 6           | 36            | 75             | 114          |
| 212706       | 330016o10r  | 21         | 188          | 34            | 313         | 40          | 1437          | 45             | 1339         |
| 212712       | Satb2       | 5          | 10           | 29            | 59          | 6           | 15            | 32             | 61           |
| 212772       | 700007p21r  | 22         | 364          | 23            | 634         | 24          | 299           | 26             | 441          |
| 212862       | Chpt1       | 7          | 15           | 44            | 78          | 7           | 12            | 43             | 112          |
| 212880       | Ddx46       | 276        | 979          | 797           | 819         | 275         | 805           | 641            | 567          |
| 212919       | Kctd7       | 7          | 28           | 34            | 139         | 9           | 23            | 34             | 155          |
| 212937       | Bc027057    | 8          | 6            | 36            | 17          | 9           | 5             | 42             | 58           |
| 212986       | Scfd2       | 29         | 181          | 166           | 243         | 23          | 76            | 97             | 177          |
| 212996       | Wbscr17     | 8          | 7            | 24            | 68          | 8           | 7             | 25             | 55           |
| 212999       | Tnpo2       | 118        | 110          | 47            | 2661        | 79          | 66            | 38             | 1557         |
| 213002       | Ifitm6      | 5          | 9            | 21            | 26          | 5           | 6             | 24             | 32           |
| 213019       | Pdlim2      | 85         | 1255         | 57            | 5324        | 97          | 1746          | 652            | 7351         |
| 213027       | 130050i23r  | 20         | 39           | 80            | 56          | 20          | 67            | 83             | 61           |
| 213053       | Slc39a14    | 25         | 50           | 38            | 398         | 14          | 14            | 32             | 219          |
| 213054       | Gabpb2      | 154        | 6            | 63            | 324         | 187         | 4             | 81             | 226          |
| 213081       | Wdr19       | 15         | 233          | 23            | 419         | 11          | 110           | 25             | 252          |
| 213084       | Cdkl3       | 13         | 15           | 35            | 394         | 13          | 12            | 35             | 503          |
| 213119       | Itga10      | 17         | 12           | 107           | 39          | 17          | 6             | 65             | 36           |
| 213211       | Rnf26       | 70         | 584          | 382           | 165         | 67          | 574           | 363            | 177          |
| 213236       | Dnd1        | 9          | 72           | 63            | 201         | 7           | 56            | 53             | 195          |
| 213262       | Fstl5       | 5          | 34           | 24            | 36          | 4           | 31            | 22             | 36           |
| 213272       | Txndc2      | 6          | 7            | 36            | 51          | 5           | 7             | 35             | 49           |
| 213311       | Fbxl21      | 6          | 2            | 30            | 20          | 5           | 3             | 33             | 19           |
| 213391       | Rassf4      | 7          | 2            | 30            | 30          | 64          | 111           | 635            | 1347         |
| 213409       | Lemd1       | 5          | 3            | 33            | 77          | 4           | 3             | 33             | 75           |
| 213435       | 830007f02r  | 9          | 4            | 28            | 45          | 8           | 5             | 28             | 38           |
| 213436       | Zcchc5      | 5          | 2            | 27            | 49          | 6           | 3             | 28             | 46           |
| 213452       | Ripk5       | 28         | 70           | 26            | 1090        | 32          | 77            | 28             | 1285         |
| 213464       | Rbbp5       | 113        | 378          | 114           | 1430        | 120         | 335           | 132            | 1011         |
| 213469       | Lgi3        | 6          | 14           | 17            | 200         | 7           | 14            | 30             | 214          |
| 213491       | D4ertd22e   | 155        | 237          | 258           | 568         | 160         | 1315          | 342            | 742          |
| 213498       | Arhgef11    | 100        | 319          | 658           | 66          | 82          | 243           | 483            | 73           |
| 213499       | Fbxo42      | 111        | 112          | 306           | 277         | 97          | 114           | 242            | 262          |
| 213527       | Pthr2       | 5          | 6            | 28            | 61          | 5           | 9             | 30             | 41           |
| 213539       | Bag2        | 8          | 21           | 24            | 49          | 8           | 33            | 31             | 44           |
| 213541       | Ythdf2      | 136        | 669          | 263           | 6481        | 144         | 1021          | 257            | 6074         |
| 213556       | Plekhh2     | 4          | 6            | 23            | 43          | 5           | 6             | 24             | 33           |

| NCBI Gene ID | Gene Symbol | Affy. CD4+ | Agilent CD4+ | Illumina CD4+ | Nimbl. CD4+ | Affy. CD19+ | Agilent CD19+ | Illumina CD19+ | Nimbl. CD19+ |
|--------------|-------------|------------|--------------|---------------|-------------|-------------|---------------|----------------|--------------|
| 213649       | Arhgef19    | 10         | 12           | 22            | 52          | 11          | 13            | 24             | 63           |
| 213753       | Zfp598      | 66         | 947          | 115           | 43          | 58          | 676           | 98             | 42           |
| 213773       | Tbl3        | 34         | 95           | 152           | 298         | 38          | 135           | 188            | 336          |
| 213783       | Plekhg1     | 5          | 5            | 23            | 47          | 5           | 3             | 23             | 38           |
| 213788       | Chrm5       | 6          | 11           | 23            | 85          | 8           | 10            | 21             | 87           |
| 213827       | Arcn1       | 152        | 291          | 88            | 4275        | 146         | 212           | 86             | 3291         |
| 213945       | Col28a1     | 11         | 3            | 40            | 23          | 10          | 3             | 40             | 20           |
| 213990       | Centg3      | 51         | 577          | 52            | 742         | 32          | 407           | 36             | 493          |
| 213993       | 530007b06r  | 39         | 24           | 24            | 90          | 46          | 13            | 29             | 99           |
| 214084       | Slc18a2     | 8          | 25           | 40            | 192         | 8           | 16            | 38             | 231          |
| 214105       | Sox30       | 6          | 2            | 28            | 59          | 7           | 3             | 25             | 33           |
| 214111       | Slc24a1     | 10         | 2            | 26            | 14          | 11          | 3             | 27             | 16           |
| 214133       | 130014j05r  | 40         | 68           | 684           | 992         | 53          | 89            | 855            | 885          |
| 214150       | Eif2c3      | 57         | 112          | 458           | 73          | 48          | 73            | 404            | 38           |
| 214189       | Scgn        | 5          | 2            | 24            | 30          | 5           | 3             | 32             | 20           |
| 214240       | Disp2       | 7          | 12           | 29            | 28          | 7           | 9             | 29             | 25           |
| 214253       | Etnk2       | 5          | 33           | 25            | 73          | 5           | 34            | 31             | 54           |
| 214254       | Nudt15      | 43         | 13           | 33            | 171         | 53          | 34            | 56             | 464          |
| 214290       | Zcchc6      | 298        | 266          | 2405          | 1212        | 326         | 339           | 2451           | 1255         |
| 214301       | Crygn       | 19         | 7            | 45            | 75          | 17          | 6             | 37             | 52           |
| 214345       | Lrrc1       | 74         | 303          | 174           | 2208        | 24          | 52            | 71             | 995          |
| 214384       | Myocd       | 6          | 16           | 36            | 38          | 6           | 17            | 36             | 29           |
| 214424       | Parp16      | 21         | 95           | 170           | 828         | 18          | 56            | 101            | 542          |
| 214425       | Cilp        | 10         | 2            | 20            | 50          | 10          | 5             | 25             | 32           |
| 214444       | Cdk5rap2    | 56         | 33           | 27            | 101         | 74          | 31            | 27             | 111          |
| 214489       | Bc003965    | 98         | 1718         | 1135          | 490         | 99          | 1791          | 1175           | 481          |
| 214523       | Tmprss4     | 10         | 4            | 43            | 19          | 10          | 5             | 42             | 24           |
| 214579       | Aldh5a1     | 8          | 57           | 134           | 97          | 7           | 12            | 132            | 49           |
| 214593       | Duox2       | 6          | 106          | 23            | 26          | 6           | 198           | 22             | 75           |
| 214601       | Slc10a3     | 53         | 229          | 438           | 1777        | 58          | 203           | 410            | 1634         |
| 214639       | 930486l24r  | 5          | 44           | 85            | 37          | 5           | 3             | 29             | 24           |
| 214663       | Slc25a29    | 18         | 107          | 44            | 68          | 15          | 55            | 35             | 59           |
| 214669       | L3mbtl2     | 42         | 90           | 266           | 1758        | 45          | 78            | 263            | 1970         |
| 214742       | Rcor3       | 24         | 87           | 51            | 88          | 20          | 62            | 41             | 52           |
| 214766       | Mmp21       | 10         | 10           | 23            | 114         | 10          | 13            | 28             | 72           |
| 214791       | Sertad4     | 8          | 4            | 27            | 15          | 8           | 7             | 22             | 27           |
| 214812       | Zfp609      | 69         | 14           | 25            | 21          | 59          | 7             | 27             | 21           |
| 214854       | LincR       | 57         | 300          | 44            | 267         | 140         | 475           | 76             | 634          |
| 214855       | Arid5a      | 111        | 221          | 264           | 254         | 71          | 142           | 166            | 193          |
| 214895       | Lman2l      | 125        | 238          | 775           | 947         | 90          | 175           | 601            | 532          |
| 214897       | Csnk1g1     | 74         | 614          | 266           | 1891        | 67          | 434           | 278            | 1336         |
| 214899       | Jarid1a     | 239        | 177          | 19            | 245         | 242         | 100           | 19             | 157          |
| 214901       | Chtf18      | 11         | 52           | 52            | 59          | 11          | 98            | 79             | 120          |
| 214922       | Slc39a2     | 36         | 34           | 23            | 327         | 28          | 27            | 24             | 278          |
| 214931       | Fbxl16      | 6          | 5            | 36            | 22          | 6           | 4             | 30             | 18           |
| 214932       | Cecr5       | 198        | 172          | 863           | 482         | 83          | 77            | 280            | 93           |
| 214944       | Mobkl2b     | 40         | 42           | 42            | 52          | 24          | 24            | 33             | 24           |
| 214952       | Rhot2       | 57         | 793          | 523           | 139         | 44          | 860           | 442            | 102          |
| 214968       | Sema6d      | 7          | 7            | 36            | 74          | 7           | 8             | 33             | 90           |
| 214987       | 330457o10r  | 307        | 81           | 274           | 652         | 280         | 101           | 218            | 558          |
| 215031       | Vgll2       | 20         | 2            | 37            | 23          | 19          | 3             | 37             | 28           |

| NCBI Gene ID | Gene Symbol | Affy. CD4+ | Agilent CD4+ | Illumina CD4+ | Nimbl. CD4+ | Affy. CD19+ | Agilent CD19+ | Illumina CD19+ | Nimbl. CD19+ |
|--------------|-------------|------------|--------------|---------------|-------------|-------------|---------------|----------------|--------------|
| 215061       | Trim50      | 8          | 6            | 30            | 30          | 10          | 9             | 23             | 27           |
| 215085       | Slc35f1     | 6          | 5            | 21            | 19          | 6           | 6             | 22             | 16           |
| 215095       | Astl        | 8          | 15           | 26            | 32          | 7           | 9             | 22             | 34           |
| 215114       | Hip1        | 10         | 64           | 31            | 27          | 21          | 61            | 256            | 47           |
| 215193       | Aa408296    | 73         | 112          | 412           | 1682        | 60          | 83            | 314            | 910          |
| 215257       | Il1f9       | 4          | 2            | 26            | 37          | 5           | 3             | 23             | 49           |
| 215274       | Il1f10      | 6          | 5            | 25            | 20          | 7           | 7             | 26             | 26           |
| 215303       | Camk1g      | 5          | 85           | 24            | 34          | 5           | 85            | 26             | 45           |
| 215332       | Slc36a3     | 9          | 18           | 30            | 111         | 10          | 13            | 33             | 120          |
| 215335       | Slc36a1     | 48         | 155          | 39            | 53          | 27          | 55            | 36             | 65           |
| 215351       | Senp6       | 320        | 559          | 63            | 2960        | 302         | 490           | 53             | 1830         |
| 215378       | 330045n13r  | 5          | 2            | 26            | 34          | 5           | 3             | 25             | 24           |
| 215384       | 330053a07r  | 8          | 15           | 26            | 20          | 8           | 14            | 20             | 22           |
| 215418       | Axud1       | 67         | 535          | 756           | 4123        | 86          | 620           | 895            | 4727         |
| 215436       | Slc35e3     | 36         | 294          | 118           | 2275        | 35          | 658           | 176            | 3052         |
| 215446       | Entpd3      | 9          | 3            | 25            | 133         | 7           | 3             | 25             | 148          |
| 215449       | Rap1b       | 859        | 1523         | 5401          | 30960       | 698         | 833           | 4438           | 25319        |
| 215494       | C85492      | 11         | 10           | 37            | 76          | 11          | 3             | 27             | 106          |
| 215615       | Rnpep       | 29         | 518          | 563           | 296         | 30          | 590           | 511            | 292          |
| 215627       | Zbtb8       | 7          | 3            | 29            | 23          | 7           | 3             | 24             | 26           |
| 215632       | Psd4        | 283        | 195          | 78            | 1101        | 287         | 244           | 60             | 1315         |
| 215653       | Rassf2      | 366        | 1561         | 859           | 27069       | 401         | 1806          | 699            | 23569        |
| 215690       | Nav1        | 7          | 8            | 36            | 77          | 7           | 5             | 37             | 97           |
| 215705       | Arrdc1      | 86         | 356          | 96            | 301         | 96          | 393           | 95             | 230          |
| 215789       | Phactr2     | 9          | 12           | 30            | 41          | 7           | 4             | 29             | 25           |
| 215798       | Gpr126      | 6          | 7            | 26            | 93          | 5           | 4             | 26             | 162          |
| 215929       | Ai317395    | 8          | 2            | 27            | 30          | 7           | 3             | 25             | 38           |
| 215951       | Lace1       | 28         | 35           | 103           | 165         | 39          | 49            | 134            | 323          |
| 216001       | Cbara1      | 41         | 46           | 82            | 672         | 57          | 55            | 94             | 611          |
| 216011       | Lrrc20      | 16         | 26           | 34            | 72          | 23          | 53            | 35             | 83           |
| 216028       | Lrrtm3      | 7          | 3            | 20            | 30          | 7           | 3             | 26             | 25           |
| 216049       | Zfp365      | 9          | 11           | 103           | 328         | 8           | 4             | 28             | 33           |
| 216080       | Ube2d1      | 166        | 39           | 22            | 1048        | 182         | 32            | 20             | 959          |
| 216131       | Tmem1       | 170        | 7            | 1260          | 6733        | 137         | 10            | 1030           | 5131         |
| 216134       | Pdxk        | 56         | 998          | 19            | 36          | 67          | 1148          | 21             | 50           |
| 216136       | Ilvbl       | 46         | 203          | 665           | 6255        | 43          | 189           | 502            | 4892         |
| 216150       | Cdc34       | 76         | 286          | 321           | 1990        | 82          | 339           | 303            | 2419         |
| 216151       | Polrmt      | 69         | 523          | 1097          | 508         | 71          | 427           | 962            | 397          |
| 216152       | Bc005764    | 16         | 19           | 30            | 835         | 19          | 11            | 30             | 614          |
| 216156       | Wdr18       | 59         | 102          | 68            | 230         | 60          | 151           | 77             | 283          |
| 216157       | Orf61       | 193        | 149          | 347           | 822         | 179         | 172           | 279            | 733          |
| 216164       | Dos         | 30         | 577          | 384           | 262         | 17          | 96            | 82             | 96           |
| 216166       | 330514a18r  | 7          | 14           | 30            | 44          | 7           | 12            | 25             | 53           |
| 216197       | Ckap4       | 18         | 9            | 27            | 120         | 33          | 228           | 26             | 2409         |
| 216225       | Slc5a8      | 5          | 5            | 23            | 19          | 5           | 4             | 26             | 56           |
| 216227       | Slc17a8     | 8          | 81           | 20            | 17          | 8           | 42            | 22             | 20           |
| 216233       | Socs2       | 7          | 23           | 102           | 1000        | 7           | 7             | 43             | 166          |
| 216238       | Eea1        | 14         | 19           | 27            | 112         | 54          | 73            | 29             | 647          |
| 216343       | Tph2        | 5          | 2            | 20            | 22          | 5           | 3             | 16             | 35           |
| 216344       | Rab21       | 268        | 286          | 185           | 1655        | 343         | 320           | 234            | 1531         |
| 216363       | Rab3ip      | 190        | 493          | 191           | 2676        | 75          | 189           | 74             | 903          |



| NCBI Gene ID | Gene Symbol | Affy. CD4+ | Agilent CD4+ | Illumina CD4+ | Nimbl. CD4+ | Affy. CD19+ | Agilent CD19+ | Illumina CD19+ | Nimbl. CD19+ |
|--------------|-------------|------------|--------------|---------------|-------------|-------------|---------------|----------------|--------------|
| 216393       | 330020b18r  | 6          | 3            | 25            | 95          | 6           | 3             | 27             | 114          |
| 216395       | Tmem5       | 21         | 47           | 191           | 275         | 19          | 37            | 157            | 196          |
| 216445       | Arhgap9     | 229        | 1854         | 1597          | 16140       | 72          | 696           | 487            | 6180         |
| 216453       | Rdhs        | 4          | 36           | 22            | 22          | 4           | 34            | 26             | 32           |
| 216456       | Gls2        | 6          | 2            | 31            | 75          | 6           | 3             | 29             | 73           |
| 216516       | 330562d19r  | 11         | 39           | 22            | 153         | 15          | 36            | 20             | 120          |
| 216527       | Ccm2        | 486        | 2295         | 343           | 7192        | 426         | 1884          | 250            | 4831         |
| 216558       | Ugp2        | 33         | 202          | 98            | 14339       | 42          | 233           | 137            | 15290        |
| 216560       | Av249152    | 5          | 3            | 40            | 23          | 5           | 54            | 40             | 52           |
| 216565       | Ehbp1       | 9          | 14           | 17            | 99          | 11          | 15            | 20             | 107          |
| 216578       | Papolg      | 105        | 381          | 159           | 2841        | 105         | 390           | 178            | 2462         |
| 216616       | Efemp1      | 6          | 6            | 18            | 31          | 6           | 10            | 20             | 47           |
| 216622       | 331440f15r  | 8          | 100          | 62            | 214         | 9           | 106           | 55             | 179          |
| 216635       | Hbq1        | 5          | 2            | 26            | 20          | 5           | 3             | 29             | 21           |
| 216643       | Gabrp       | 5          | 9            | 26            | 164         | 5           | 16            | 31             | 90           |
| 216724       | Rufy1       | 74         | 242          | 131           | 751         | 145         | 526           | 253            | 1449         |
| 216725       | Adamts2     | 12         | 18           | 29            | 43          | 10          | 9             | 26             | 45           |
| 216739       | Acsl6       | 6          | 3            | 30            | 124         | 5           | 8             | 29             | 96           |
| 216749       | Nmur2       | 6          | 2            | 26            | 17          | 6           | 4             | 31             | 17           |
| 216760       | Mfap3       | 65         | 128          | 279           | 1020        | 99          | 212           | 351            | 1447         |
| 216766       | Gemin5      | 58         | 347          | 80            | 966         | 54          | 290           | 60             | 661          |
| 216767       | Mrpl22      | 15         | 277          | 780           | 3720        | 20          | 249           | 696            | 3380         |
| 216795       | Wnt9a       | 17         | 5            | 28            | 28          | 16          | 6             | 29             | 29           |
| 216810       | Tom1l2      | 51         | 256          | 31            | 158         | 36          | 145           | 33             | 61           |
| 216825       | Usp22       | 61         | 44           | 248           | 16          | 75          | 55            | 293            | 16           |
| 216831       | Au040829    | 7          | 8            | 22            | 147         | 6           | 7             | 24             | 121          |
| 216835       | Usp43       | 13         | 12           | 24            | 85          | 12          | 13            | 22             | 141          |
| 216848       | Chd3        | 541        | 6159         | 3192          | 846         | 152         | 1747          | 908            | 302          |
| 216850       | Jmjd3       | 210        | 692          | 95            | 36416       | 118         | 271           | 49             | 22664        |
| 216856       | Nlgn2       | 17         | 17           | 38            | 21          | 13          | 7             | 31             | 27           |
| 216858       | Kctd11      | 8          | 9            | 21            | 44          | 8           | 18            | 21             | 77           |
| 216859       | Centb1      | 396        | 2076         | 2600          | 3449        | 391         | 1941          | 2203           | 3330         |
| 216864       | Mgl2        | 5          | 14           | 34            | 43          | 5           | 15            | 34             | 30           |
| 216867       | Slc16a11    | 14         | 17           | 35            | 123         | 13          | 24            | 32             | 112          |
| 216869       | Arrb2       | 352        | 1486         | 835           | 9132        | 115         | 360           | 187            | 3202         |
| 216873       | Spag7       | 59         | 284          | 73            | 1265        | 78          | 447           | 87             | 1924         |
| 216874       | Camta2      | 98         | 11           | 1216          | 4037        | 113         | 19            | 1338           | 8107         |
| 216877       | Dhx33       | 42         | 626          | 303           | 3775        | 48          | 725           | 332            | 4558         |
| 216961       | Coro6       | 15         | 2            | 25            | 35          | 14          | 3             | 28             | 49           |
| 216991       | Centa2      | 6          | 25           | 28            | 24          | 7           | 22            | 27             | 32           |
| 217030       | Ap1gbp1     | 173        | 179          | 303           | 1750        | 163         | 112           | 271            | 1620         |
| 217031       | Tada2l      | 24         | 195          | 129           | 232         | 24          | 150           | 126            | 166          |
| 217039       | Ggnbp2      | 186        | 775          | 2500          | 11309       | 169         | 692           | 2104           | 10051        |
| 217069       | Trim25      | 98         | 1311         | 1375          | 11409       | 135         | 1489          | 1749           | 14561        |
| 217082       | Hlf         | 7          | 9            | 26            | 31          | 7           | 9             | 26             | 23           |
| 217119       | Xylt2       | 112        | 1752         | 437           | 175         | 41          | 459           | 119            | 69           |
| 217124       | Ppp1r9b     | 214        | 147          | 730           | 189         | 145         | 145           | 480            | 156          |
| 217127       | Myst2       | 218        | 325          | 220           | 505         | 217         | 283           | 211            | 393          |
| 217140       | Scrn2       | 14         | 17           | 45            | 100         | 18          | 32            | 64             | 118          |
| 217154       | Stac2       | 13         | 5            | 31            | 19          | 25          | 44            | 188            | 68           |
| 217166       | Nr1d1       | 14         | 75           | 43            | 56          | 12          | 61            | 43             | 73           |

| NCBI Gene ID | Gene Symbol | Affy. CD4+ | Agilent CD4+ | Illumina CD4+ | Nimbl. CD4+ | Affy. CD19+ | Agilent CD19+ | Illumina CD19+ | Nimbl. CD19+ |
|--------------|-------------|------------|--------------|---------------|-------------|-------------|---------------|----------------|--------------|
| 217194       | Klhl11      | 54         | 6            | 26            | 35          | 54          | 5             | 24             | 27           |
| 217201       | Rundc1      | 56         | 177          | 155           | 194         | 62          | 180           | 134            | 124          |
| 217207       | Dhx8        | 151        | 104          | 134           | 348         | 159         | 83            | 133            | 310          |
| 217212       | Pyy         | 12         | 53           | 31            | 54          | 11          | 70            | 29             | 40           |
| 217214       | Nags        | 7          | 8            | 35            | 62          | 7           | 12            | 35             | 53           |
| 217216       | Bc030867    | 6          | 53           | 83            | 44          | 8           | 48            | 69             | 40           |
| 217217       | Asb16       | 8          | 19           | 22            | 57          | 10          | 19            | 24             | 109          |
| 217219       | Bc025575    | 10         | 94           | 29            | 52          | 9           | 73            | 25             | 81           |
| 217232       | Cdc27       | 108        | 171          | 57            | 4272        | 110         | 163           | 64             | 3414         |
| 217258       | Abca8a      | 4          | 15           | 25            | 45          | 4           | 8             | 30             | 91           |
| 217262       | Abca9       | 5          | 5            | 28            | 49          | 6           | 4             | 27             | 186          |
| 217265       | Abca5       | 7          | 4            | 28            | 18          | 7           | 4             | 36             | 21           |
| 217302       | Gpr142      | 6          | 6            | 27            | 27          | 7           | 4             | 29             | 24           |
| 217305       | 732429d16r  | 5          | 5            | 60            | 45          | 5           | 4             | 58             | 55           |
| 217316       | Slc16a5     | 45         | 149          | 1462          | 508         | 8           | 6             | 41             | 18           |
| 217333       | Trim47      | 13         | 167          | 47            | 120         | 14          | 92            | 33             | 99           |
| 217335       | Fbf1        | 19         | 101          | 64            | 160         | 21          | 128           | 59             | 199          |
| 217337       | Srp68       | 144        | 203          | 88            | 1246        | 139         | 174           | 89             | 868          |
| 217353       | Tmc6        | 133        | 3426         | 2031          | 5091        | 86          | 1711          | 1034           | 2725         |
| 217369       | Uts2r       | 9          | 104          | 23            | 40          | 9           | 127           | 25             | 57           |
| 217371       | Rab40b      | 8          | 2            | 24            | 18          | 7           | 3             | 21             | 22           |
| 217379       | Ubx4        | 60         | 76           | 29            | 2143        | 53          | 57            | 33             | 1528         |
| 217410       | Trib2       | 389        | 2812         | 2932          | 17341       | 105         | 445           | 717            | 5528         |
| 217449       | Ttc15       | 146        | 932          | 961           | 723         | 101         | 665           | 842            | 500          |
| 217463       | Snx13       | 70         | 38           | 267           | 256         | 117         | 61            | 521            | 317          |
| 217473       | Ankmy2      | 82         | 301          | 814           | 7041        | 46          | 207           | 454            | 4058         |
| 217480       | Dgkb        | 4          | 5            | 27            | 50          | 5           | 5             | 29             | 61           |
| 217517       | Stxbp6      | 6          | 2            | 28            | 31          | 6           | 3             | 30             | 27           |
| 217588       | Mbip        | 31         | 205          | 185           | 83          | 36          | 203           | 182            | 66           |
| 217593       | Slc25a21    | 5          | 3            | 22            | 49          | 5           | 3             | 20             | 42           |
| 217664       | Mgat2       | 80         | 149          | 22            | 174         | 75          | 161           | 24             | 113          |
| 217674       | Gphb5       | 7          | 2            | 28            | 51          | 7           | 3             | 25             | 37           |
| 217682       | 330431g21r  | 7          | 3            | 24            | 29          | 7           | 3             | 23             | 61           |
| 217692       | Sipa1l1     | 172        | 2163         | 1850          | 206         | 86          | 987           | 820            | 151          |
| 217695       | Zfyve1      | 57         | 48           | 81            | 213         | 58          | 58            | 75             | 179          |
| 217707       | Coq6        | 18         | 89           | 478           | 257         | 16          | 71            | 524            | 204          |
| 217715       | Eif2b2      | 84         | 1834         | 367           | 5488        | 85          | 1584          | 322            | 3943         |
| 217716       | Mlh3        | 34         | 76           | 67            | 235         | 26          | 47            | 50             | 176          |
| 217718       | Nek9        | 149        | 1281         | 164           | 8883        | 169         | 1148          | 137            | 7964         |
| 217734       | Pomt2       | 25         | 42           | 54            | 59          | 32          | 66            | 79             | 96           |
| 217737       | Ahsa1       | 223        | 4470         | 492           | 11511       | 233         | 5277          | 428            | 11116        |
| 217826       | Kcnk13      | 15         | 138          | 35            | 74          | 17          | 137           | 91             | 179          |
| 217835       | Rin3        | 113        | 633          | 1248          | 450         | 145         | 622           | 1247           | 479          |
| 217837       | Itpk1       | 118        | 176          | 1466          | 554         | 51          | 93            | 779            | 269          |
| 217845       | 810023f06r  | 18         | 6            | 17            | 33          | 23          | 5             | 18             | 49           |
| 217847       | Serpina10   | 8          | 31           | 31            | 26          | 7           | 33            | 24             | 61           |
| 217864       | Rcor1       | 209        | 2762         | 44            | 93          | 134         | 1355          | 41             | 51           |
| 217866       | Cdc42bpb    | 11         | 22           | 229           | 75          | 13          | 25            | 210            | 72           |
| 217869       | Eif5        | 382        | 1011         | 458           | 4778        | 382         | 770           | 386            | 4515         |
| 217887       | Bc022687    | 8          | 2            | 31            | 197         | 9           | 6             | 26             | 205          |
| 217944       | Rapgef5     | 9          | 8            | 31            | 93          | 37          | 179           | 90             | 1490         |

| NCBI Gene ID | Gene Symbol | Affy. CD4+ | Agilent CD4+ | Illumina CD4+ | Nimbl. CD4+ | Affy. CD19+ | Agilent CD19+ | Illumina CD19+ | Nimbl. CD19+ |
|--------------|-------------|------------|--------------|---------------|-------------|-------------|---------------|----------------|--------------|
| 218030       | Pou6f2      | 9          | 31           | 24            | 41          | 11          | 24            | 21             | 67           |
| 218035       | Vps41       | 119        | 358          | 85            | 879         | 155         | 446           | 116            | 888          |
| 218038       | Amph        | 5          | 4            | 34            | 21          | 6           | 4             | 35             | 18           |
| 218103       | Slc17a2     | 6          | 48           | 27            | 23          | 6           | 46            | 28             | 19           |
| 218138       | Gmnds       | 29         | 13           | 206           | 253         | 31          | 16            | 228            | 221          |
| 218203       | Mylip       | 200        | 1071         | 32            | 3030        | 396         | 2516          | 33             | 4821         |
| 218210       | Nup153      | 395        | 1060         | 23            | 5558        | 248         | 531           | 17             | 2888         |
| 218214       | Aof1        | 50         | 258          | 67            | 510         | 49          | 248           | 66             | 513          |
| 218215       | Ibrdc2      | 7          | 3            | 26            | 18          | 7           | 3             | 30             | 18           |
| 218236       | Bc010304    | 359        | 354          | 550           | 60          | 281         | 251           | 450            | 47           |
| 218271       | B4galt7     | 41         | 123          | 167           | 160         | 35          | 110           | 121            | 162          |
| 218294       | Cdc14b      | 42         | 101          | 209           | 1429        | 17          | 40            | 89             | 390          |
| 218397       | Rasa1       | 171        | 253          | 1462          | 2641        | 127         | 168           | 895            | 1357         |
| 218440       | 30502m16i   | 23         | 2            | 23            | 20          | 22          | 3             | 24             | 23           |
| 218441       | Zfyve16     | 24         | 63           | 113           | 205         | 26          | 59            | 115            | 151          |
| 218454       | Lhfpl2      | 6          | 2            | 47            | 20          | 6           | 3             | 47             | 27           |
| 218460       | Wdr41       | 107        | 87           | 37            | 3078        | 97          | 77            | 39             | 2205         |
| 218461       | Pde8b       | 7          | 5            | 24            | 341         | 7           | 3             | 24             | 183          |
| 218490       | Btf3        | 533        | 4508         | 3750          | 23637       | 550         | 3882          | 3859           | 23174        |
| 218506       | Mrps27      | 18         | 48           | 180           | 303         | 20          | 66            | 179            | 374          |
| 218518       | Marveld2    | 22         | 33           | 17            | 115         | 50          | 96            | 25             | 259          |
| 218544       | Sgtb        | 5          | 5            | 42            | 24          | 5           | 3             | 35             | 28           |
| 218581       | Depdc1b     | 11         | 34           | 42            | 44          | 11          | 13            | 33             | 22           |
| 218624       | Il31ra      | 5          | 24           | 27            | 53          | 5           | 19            | 26             | 68           |
| 218629       | Dhx29       | 74         | 249          | 340           | 161         | 74          | 260           | 432            | 143          |
| 218693       | Paip1       | 130        | 131          | 95            | 234         | 109         | 88            | 72             | 152          |
| 218699       | Pxk         | 119        | 922          | 109           | 947         | 589         | 5921          | 234            | 5323         |
| 218734       | 330406c13r  | 46         | 74           | 181           | 7083        | 49          | 93            | 194            | 6090         |
| 218756       | Slc4a7      | 43         | 5468         | 196           | 318         | 125         | 5870          | 461            | 660          |
| 218763       | Lrrc3b      | 6          | 26           | 31            | 413         | 6           | 20            | 32             | 551          |
| 218772       | Rarb        | 8          | 20           | 33            | 116         | 7           | 19            | 28             | 55           |
| 218793       | Ube2e2      | 12         | 36           | 40            | 702         | 12          | 28            | 45             | 1042         |
| 218811       | Sec24c      | 355        | 1610         | 971           | 6786        | 299         | 876           | 680            | 4119         |
| 218820       | Zfp503      | 8          | 3            | 23            | 249         | 8           | 3             | 22             | 198          |
| 218832       | Polr3a      | 98         | 184          | 179           | 534         | 110         | 185           | 185            | 636          |
| 218865       | Chdh        | 15         | 11           | 53            | 53          | 13          | 3             | 28             | 56           |
| 218952       | Plekhc1     | 7          | 4            | 23            | 21          | 8           | 5             | 22             | 17           |
| 218973       | Wdhd1       | 32         | 172          | 58            | 555         | 44          | 269           | 82             | 754          |
| 218977       | Dlg7        | 11         | 11           | 67            | 174         | 12          | 8             | 51             | 176          |
| 219022       | Ttc5        | 46         | 416          | 31            | 897         | 50          | 617           | 33             | 783          |
| 219065       | 530038e17r  | 12         | 12           | 147           | 87          | 8           | 3             | 21             | 80           |
| 219103       | Cenpj       | 46         | 427          | 133           | 2663        | 29          | 214           | 90             | 1581         |
| 219131       | Phf11       | 14         | 389          | 144           | 1455        | 12          | 578           | 198            | 1768         |
| 219135       | Mtmr6       | 109        | 1748         | 21            | 7864        | 105         | 1423          | 25             | 6067         |
| 219144       | Arl11       | 10         | 2            | 29            | 61          | 9           | 2             | 24             | 79           |
| 219151       | Scara3      | 8          | 4            | 21            | 30          | 7           | 4             | 19             | 33           |
| 219170       | Au021034    | 6          | 2            | 32            | 35          | 6           | 3             | 33             | 36           |
| 219249       | Tdrd3       | 54         | 348          | 385           | 441         | 43          | 285           | 259            | 209          |
| 219257       | Pcdh20      | 6          | 3            | 23            | 18          | 5           | 6             | 27             | 22           |
| 223227       | Sox21       | 16         | 50           | 41            | 46          | 15          | 41            | 41             | 37           |
| 223254       | Farp1       | 7          | 11           | 39            | 298         | 7           | 3             | 27             | 181          |

| NCBI Gene ID | Gene Symbol | Affy. CD4+ | Agilent CD4+ | Illumina CD4+ | Nimbl. CD4+ | Affy. CD19+ | Agilent CD19+ | Illumina CD19+ | Nimbl. CD19+ |
|--------------|-------------|------------|--------------|---------------|-------------|-------------|---------------|----------------|--------------|
| 223255       | Stk24       | 261        | 837          | 927           | 243         | 278         | 852           | 906            | 211          |
| 223272       | Itgbl1      | 5          | 2            | 39            | 68          | 6           | 3             | 46             | 36           |
| 223435       | Trio        | 41         | 320          | 454           | 19          | 35          | 178           | 385            | 19           |
| 223453       | Dap         | 111        | 643          | 661           | 1812        | 69          | 247           | 275            | 928          |
| 223593       | 130025e21r  | 84         | 240          | 109           | 638         | 114         | 288           | 137            | 631          |
| 223626       | 930572j05r  | 55         | 8            | 46            | 31          | 70          | 10            | 46             | 38           |
| 223658       | 330001f17r  | 46         | 1766         | 936           | 85          | 55          | 1949          | 1098           | 123          |
| 223669       | Zfp7        | 51         | 321          | 36            | 782         | 44          | 230           | 33             | 574          |
| 223696       | Tomm22      | 74         | 1691         | 1046          | 12187       | 68          | 1643          | 1026           | 11635        |
| 223701       | Mkl1        | 142        | 3340         | 378           | 369         | 102         | 2318          | 274            | 206          |
| 223753       | Cerk        | 37         | 109          | 543           | 411         | 204         | 849           | 3448           | 2146         |
| 223773       | Zbed4       | 46         | 130          | 216           | 853         | 60          | 127           | 267            | 690          |
| 223774       | Alg12       | 43         | 177          | 86            | 123         | 40          | 182           | 81             | 103          |
| 223775       | Pim3        | 60         | 167          | 338           | 298         | 56          | 198           | 334            | 260          |
| 223776       | 300018j18r  | 91         | 389          | 130           | 1898        | 90          | 354           | 121            | 2135         |
| 223780       | Adm2        | 17         | 2            | 32            | 59          | 14          | 3             | 31             | 46           |
| 223838       | Adamts20    | 6          | 8            | 25            | 48          | 6           | 5             | 25             | 44           |
| 223864       | Rapgef3     | 10         | 16           | 29            | 50          | 11          | 201           | 41             | 50           |
| 223870       | Senp1       | 128        | 32           | 108           | 794         | 153         | 43            | 127            | 1099         |
| 223881       | Rnd1        | 8          | 82           | 29            | 75          | 7           | 52            | 29             | 22           |
| 223918       | Spyrd3      | 32         | 225          | 42            | 240         | 33          | 143           | 42             | 182          |
| 223920       | Soat2       | 8          | 7            | 30            | 61          | 8           | 7             | 30             | 55           |
| 223921       | Aaas        | 70         | 337          | 392           | 228         | 96          | 391           | 514            | 367          |
| 223922       | Atf7        | 237        | 40           | 34            | 380         | 257         | 44            | 36             | 279          |
| 224014       | Fgd4        | 5          | 254          | 36            | 39          | 4           | 159           | 31             | 73           |
| 224022       | Slc7a4      | 10         | 4            | 40            | 53          | 9           | 3             | 29             | 66           |
| 224024       | Scarf2      | 10         | 18           | 22            | 72          | 10          | 25            | 25             | 128          |
| 224045       | Eif2b5      | 61         | 278          | 540           | 2081        | 70          | 318           | 543            | 2000         |
| 224105       | Pak2        | 467        | 2800         | 128           | 12174       | 309         | 1876          | 83             | 8400         |
| 224116       | Muc20       | 7          | 76           | 27            | 199         | 6           | 85            | 26             | 184          |
| 224129       | Adcy5       | 8          | 11           | 24            | 30          | 9           | 9             | 25             | 31           |
| 224171       | 330027c09r  | 7          | 5            | 31            | 169         | 12          | 12            | 33             | 362          |
| 224224       | Impg2       | 8          | 32           | 33            | 158         | 7           | 20            | 32             | 121          |
| 224291       | Ckt2        | 6          | 2            | 26            | 19          | 6           | 3             | 29             | 29           |
| 224318       | Speer2      | 6          | 20           | 24            | 29          | 5           | 17            | 24             | 34           |
| 224344       | Rbm11       | 5          | 7            | 36            | 21          | 5           | 16100         | 42             | 30           |
| 224405       | Cyrr1       | 7          | 5            | 19            | 206         | 8           | 3             | 21             | 165          |
| 224419       | Orf63       | 9          | 2            | 21            | 19          | 7           | 3             | 26             | 21           |
| 224454       | Zdhhc14     | 24         | 27           | 85            | 605         | 55          | 107           | 196            | 2066         |
| 224480       | Nox3        | 6          | 3            | 25            | 30          | 5           | 3             | 24             | 31           |
| 224481       | Tfb1m       | 28         | 181          | 230           | 1183        | 30          | 181           | 241            | 1243         |
| 224530       | Acat3       | 7          | 99           | 146           | 176         | 7           | 86            | 108            | 106          |
| 224585       | Zfp160      | 32         | 56           | 26            | 304         | 40          | 68            | 30             | 346          |
| 224619       | Traf7       | 148        | 441          | 318           | 1111        | 156         | 419           | 280            | 959          |
| 224624       | Rab40c      | 56         | 488          | 515           | 573         | 47          | 443           | 430            | 442          |
| 224630       | Bnip1       | 22         | 262          | 110           | 689         | 30          | 568           | 213            | 1385         |
| 224640       | Lemd2       | 102        | 2894         | 837           | 313         | 86          | 3506          | 850            | 311          |
| 224647       | D17wsu92e   | 175        | 597          | 1566          | 99          | 118         | 586           | 1336           | 36           |
| 224650       | Anks1       | 91         | 515          | 94            | 140         | 72          | 379           | 76             | 144          |
| 224656       | Zfp523      | 14         | 282          | 37            | 197         | 15          | 310           | 32             | 230          |
| 224661       | Slc26a8     | 5          | 4            | 27            | 41          | 5           | 5             | 27             | 23           |

| NCBI Gene ID | Gene Symbol | Affy. CD4+ | Agilent CD4+ | Illumina CD4+ | Nimbl. CD4+ | Affy. CD19+ | Agilent CD19+ | Illumina CD19+ | Nimbl. CD19+ |
|--------------|-------------|------------|--------------|---------------|-------------|-------------|---------------|----------------|--------------|
| 224671       | Btbd9       | 103        | 121          | 75            | 824         | 126         | 202           | 66             | 618          |
| 224674       | Slc37a1     | 149        | 342          | 45            | 302         | 74          | 139           | 202            | 122          |
| 224697       | Adamts10    | 108        | 180          | 162           | 1645        | 57          | 78            | 75             | 1125         |
| 224705       | Vps52       | 82         | 75           | 46            | 573         | 77          | 85            | 40             | 500          |
| 224727       | Bat3        | 202        | 1608         | 1485          | 574         | 200         | 1221          | 1279           | 642          |
| 224742       | Abcf1       | 117        | 1050         | 922           | 6708        | 119         | 1101          | 724            | 6392         |
| 224753       | H2-m10.4    | 6          | 2            | 23            | 59          | 5           | 3             | 21             | 42           |
| 224754       | H2-m11      | 5          | 2            | 26            | 16          | 5           | 2             | 24             | 17           |
| 224756       | H2-m1       | 4          | 2            | 22            | 15          | 5           | 8             | 24             | 18           |
| 224761       | H2-m10.5    | 4          | 2            | 20            | 24          | 4           | 3             | 22             | 22           |
| 224762       | Trim31      | 5          | 4            | 24            | 27          | 5           | 3             | 26             | 24           |
| 224794       | Enpp4       | 57         | 297          | 299           | 2360        | 28          | 112           | 113            | 969          |
| 224796       | Clic5       | 8          | 13           | 23            | 61          | 8           | 34            | 24             | 64           |
| 224814       | Abcc10      | 39         | 3            | 198           | 52          | 32          | 3             | 132            | 46           |
| 224824       | Pex6        | 60         | 792          | 1165          | 1570        | 59          | 680           | 1204           | 1858         |
| 224829       | Trerf1      | 52         | 75           | 33            | 325         | 20          | 6             | 22             | 84           |
| 224836       | Usp49       | 13         | 2            | 161           | 91          | 14          | 3             | 164            | 143          |
| 224840       | Trem14      | 8          | 6            | 22            | 29          | 7           | 25            | 27             | 56           |
| 224860       | Plcl2       | 196        | 1608         | 678           | 3596        | 232         | 1811          | 659            | 4306         |
| 224897       | Dpp9        | 85         | 128          | 152           | 946         | 82          | 115           | 121            | 1102         |
| 224912       | Crb3        | 14         | 3            | 29            | 131         | 18          | 46            | 32             | 295          |
| 224938       | Pja2        | 83         | 248          | 419           | 3060        | 78          | 187           | 364            | 2847         |
| 224997       | Dlgap1      | 6          | 3            | 41            | 48          | 6           | 4             | 38             | 57           |
| 225020       | Fez2        | 26         | 334          | 279           | 1947        | 18          | 173           | 143            | 927          |
| 225027       | Sfrs7       | 187        | 3368         | 606           | 12108       | 188         | 2930          | 885            | 14424        |
| 225028       | Map4k3      | 42         | 64           | 217           | 556         | 28          | 39            | 146            | 376          |
| 225030       | Kcng3       | 7          | 4            | 20            | 26          | 7           | 3             | 22             | 21           |
| 225049       | Ttc7        | 166        | 1301         | 257           | 832         | 213         | 1487          | 306            | 1236         |
| 225115       | Svil        | 106        | 775          | 534           | 832         | 41          | 230           | 202            | 263          |
| 225131       | Wac         | 192        | 419          | 434           | 3010        | 183         | 400           | 428            | 2615         |
| 225160       | Thoc1       | 49         | 42           | 31            | 491         | 51          | 47            | 29             | 487          |
| 225164       | Mib1        | 47         | 318          | 84            | 57          | 36          | 249           | 67             | 42           |
| 225192       | Hrh4        | 4          | 4            | 25            | 18          | 4           | 3             | 25             | 24           |
| 225207       | Zfp521      | 5          | 2            | 34            | 23          | 5           | 3             | 28             | 33           |
| 225215       | Bc003885    | 91         | 356          | 164           | 1337        | 89          | 393           | 154            | 1371         |
| 225256       | Dsg1b       | 6          | 6            | 30            | 25          | 5           | 6             | 30             | 31           |
| 225283       | Bc021395    | 74         | 197          | 39            | 1123        | 89          | 274           | 43             | 1742         |
| 225326       | Pik3c3      | 106        | 131          | 939           | 973         | 105         | 123           | 904            | 812          |
| 225341       | Lims2       | 10         | 3            | 28            | 51          | 11          | 4             | 35             | 24           |
| 225348       | Wdr36       | 116        | 184          | 494           | 6202        | 129         | 175           | 562            | 8286         |
| 225363       | Etf1        | 141        | 195          | 1303          | 5411        | 100         | 154           | 1054           | 3784         |
| 225372       | Apbb3       | 60         | 389          | 179           | 2783        | 51          | 273           | 137            | 2218         |
| 225467       | Pggt1b      | 102        | 18           | 26            | 358         | 127         | 8             | 25             | 297          |
| 225471       | Ticam2      | 13         | 3            | 22            | 18          | 17          | 5             | 80             | 47           |
| 225579       | Slc27a6     | 5          | 4            | 28            | 28          | 5           | 5             | 29             | 23           |
| 225600       | Pde6a       | 7          | 2            | 44            | 27          | 7           | 3             | 46             | 44           |
| 225631       | Onecut2     | 23         | 7            | 27            | 130         | 20          | 7             | 28             | 168          |
| 225642       | Grp         | 8          | 4            | 27            | 36          | 7           | 3             | 25             | 26           |
| 225651       | Mppe1       | 107        | 1913         | 1021          | 7061        | 100         | 1014          | 783            | 6115         |
| 225724       | Mapk4       | 9          | 2            | 21            | 53          | 7           | 2             | 25             | 46           |
| 225745       | Ccdc5       | 28         | 717          | 174           | 720         | 28          | 672           | 157            | 553          |

| NCBI Gene ID | Gene Symbol | Affy. CD4+ | Agilent CD4+ | Illumina CD4+ | Nimbl. CD4+ | Affy. CD19+ | Agilent CD19+ | Illumina CD19+ | Nimbl. CD19+ |
|--------------|-------------|------------|--------------|---------------|-------------|-------------|---------------|----------------|--------------|
| 225791       | Zadh2       | 72         | 378          | 260           | 6525        | 72          | 404           | 277            | 5981         |
| 225825       | Cd226       | 103        | 48           | 144           | 2527        | 8           | 5             | 18             | 25           |
| 225845       | Hrasls3     | 51         | 585          | 28            | 3722        | 25          | 251           | 29             | 1917         |
| 225849       | Ppp2r5b     | 38         | 243          | 41            | 71          | 41          | 319           | 41             | 59           |
| 225865       | Catsper1    | 6          | 8            | 25            | 30          | 5           | 4             | 28             | 38           |
| 225870       | Rin1        | 23         | 11           | 46            | 85          | 23          | 6             | 52             | 58           |
| 225875       | Lrfn4       | 16         | 21           | 23            | 227         | 16          | 18            | 25             | 47           |
| 225876       | Fbxl11      | 202        | 184          | 974           | 204         | 251         | 253           | 1425           | 240          |
| 225887       | Ndufs8      | 50         | 140          | 981           | 2238        | 88          | 384           | 1732           | 5319         |
| 225896       | 19ertd721   | 130        | 4552         | 2034          | 6370        | 142         | 5513          | 1985           | 6729         |
| 225929       | Av312086    | 170        | 195          | 392           | 2846        | 149         | 115           | 302            | 2064         |
| 225997       | Trpm6       | 6          | 5            | 25            | 19          | 6           | 9             | 30             | 17           |
| 225998       | Rorb        | 5          | 4            | 32            | 26          | 5           | 3             | 33             | 27           |
| 226016       | 730446c15r  | 62         | 203          | 1480          | 3122        | 224         | 585           | 5242           | 8114         |
| 226025       | Trpm3       | 7          | 2            | 42            | 21          | 7           | 5             | 35             | 30           |
| 226041       | Pgm5        | 4          | 37           | 26            | 46          | 5           | 35            | 24             | 67           |
| 226049       | Dmrt2       | 7          | 3            | 23            | 53          | 7           | 3             | 23             | 52           |
| 226098       | Hectd2      | 17         | 128          | 53            | 826         | 6           | 16            | 34             | 30           |
| 226105       | Cyp2c70     | 5          | 124          | 20            | 19          | 7           | 79            | 20             | 23           |
| 226115       | Tmem10      | 6          | 3            | 29            | 25          | 5           | 3             | 24             | 33           |
| 226122       | Ubtbd1      | 22         | 182          | 85            | 191         | 16          | 205           | 79             | 129          |
| 226123       | Bc023055    | 10         | 16           | 25            | 52          | 8           | 15            | 31             | 40           |
| 226139       | Cox15       | 41         | 118          | 383           | 1069        | 56          | 155           | 464            | 1140         |
| 226151       | 30443o07r   | 95         | 267          | 480           | 16321       | 142         | 279           | 588            | 14843        |
| 226153       | Peo1        | 27         | 54           | 52            | 33          | 30          | 55            | 52             | 40           |
| 226154       | Lzts2       | 23         | 102          | 72            | 75          | 21          | 40            | 52             | 79           |
| 226162       | 330431n19r  | 50         | 130          | 434           | 1779        | 47          | 210           | 217            | 1193         |
| 226169       | Pprc1       | 76         | 641          | 388           | 1732        | 66          | 465           | 263            | 1368         |
| 226180       | Ina         | 7          | 2            | 24            | 32          | 8           | 3             | 23             | 30           |
| 226182       | Taf5        | 34         | 258          | 143           | 339         | 33          | 239           | 140            | 248          |
| 226243       | Habp2       | 10         | 2            | 33            | 54          | 11          | 3             | 33             | 66           |
| 226251       | Ablim1      | 387        | 1405         | 39            | 6697        | 270         | 829           | 41             | 5827         |
| 226252       | Ai450540    | 156        | 390          | 1218          | 1083        | 105         | 178           | 719            | 564          |
| 226255       | Atrnl1      | 31         | 11           | 22            | 24          | 36          | 10            | 23             | 30           |
| 226352       | Epb4.1l5    | 11         | 4            | 31            | 54          | 12          | 5             | 31             | 57           |
| 226409       | Zranb3      | 27         | 27           | 82            | 189         | 34          | 70            | 172            | 145          |
| 226414       | Dars        | 146        | 273          | 116           | 6731        | 138         | 227           | 91             | 5831         |
| 226419       | Dyrk3       | 19         | 3            | 25            | 35          | 22          | 18            | 38             | 63           |
| 226421       | 330435g22r  | 4          | 9            | 29            | 94          | 4           | 4             | 30             | 113          |
| 226422       | Rab7l1      | 49         | 304          | 318           | 2278        | 56          | 358           | 334            | 1701         |
| 226432       | Ipo9        | 162        | 21           | 547           | 931         | 148         | 27            | 452            | 676          |
| 226442       | Zfp281      | 188        | 869          | 1027          | 505         | 73          | 229           | 304            | 152          |
| 226499       | Bc003331    | 24         | 68           | 402           | 611         | 39          | 111           | 546            | 731          |
| 226519       | Lamc1       | 18         | 45           | 38            | 80          | 70          | 216           | 159            | 85           |
| 226527       | Bc026585    | 11         | 4            | 36            | 83          | 15          | 22            | 85             | 222          |
| 226564       | Fmo4        | 6          | 10           | 24            | 21          | 6           | 8             | 23             | 41           |
| 226646       | Ndufs2      | 156        | 430          | 214           | 6311        | 169         | 480           | 216            | 5609         |
| 226695       | Ifi205      | 4          | 3862         | 3276          | 7884        | 4           | 6790          | 4654           | 11314        |
| 226757       | Wdr26       | 335        | 73           | 28            | 2443        | 314         | 57            | 25             | 2425         |
| 226777       | l30074g19r  | 15         | 2            | 30            | 66          | 16          | 3             | 32             | 48           |
| 226778       | Mark1       | 5          | 2            | 31            | 47          | 6           | 3             | 30             | 39           |

| NCBI Gene ID | Gene Symbol | Affy. CD4+ | Agilent CD4+ | Illumina CD4+ | Nimbl. CD4+ | Affy. CD19+ | Agilent CD19+ | Illumina CD19+ | Nimbl. CD19+ |
|--------------|-------------|------------|--------------|---------------|-------------|-------------|---------------|----------------|--------------|
| 226791       | Lyplal1     | 7          | 7            | 22            | 23          | 7           | 8             | 27             | 30           |
| 226823       | Kctd3       | 33         | 90           | 79            | 3888        | 58          | 156           | 162            | 8586         |
| 226830       | Smyd2       | 24         | 259          | 49            | 875         | 16          | 136           | 33             | 395          |
| 226844       | 30055n22r   | 91         | 273          | 611           | 197         | 50          | 90            | 339            | 265          |
| 226849       | Ppp2r5a     | 628        | 6456         | 1293          | 1620        | 329         | 3277          | 585            | 854          |
| 226896       | Tcfap2d     | 5          | 6            | 25            | 19          | 4           | 7             | 26             | 18           |
| 226922       | Kcnq5       | 18         | 11           | 60            | 45          | 56          | 13            | 317            | 98           |
| 226971       | Plekhhb2    | 63         | 134          | 396           | 2386        | 58          | 117           | 362            | 1968         |
| 226977       | Actr1b      | 71         | 254          | 549           | 202         | 71          | 233           | 517            | 153          |
| 226982       | Eif5b       | 123        | 1713         | 1942          | 1604        | 127         | 1563          | 2078           | 1619         |
| 226999       | Slc9a2      | 5          | 3            | 28            | 55          | 5           | 3             | 24             | 119          |
| 227059       | Slc39a10    | 70         | 48           | 76            | 162         | 73          | 40            | 78             | 125          |
| 227095       | Hibch       | 39         | 414          | 21            | 1253        | 23          | 320           | 19             | 1131         |
| 227099       | Pms1        | 48         | 194          | 38            | 738         | 41          | 137           | 36             | 704          |
| 227154       | Als2cr2     | 25         | 58           | 148           | 1613        | 45          | 116           | 306            | 2543         |
| 227157       | Mpp4        | 8          | 3            | 39            | 228         | 7           | 3             | 39             | 65           |
| 227197       | Ndufs1      | 109        | 1288         | 24            | 4266        | 107         | 1312          | 19             | 3390         |
| 227231       | Cps1        | 6          | 2            | 25            | 165         | 5           | 3             | 23             | 77           |
| 227288       | Il8ra       | 10         | 2            | 68            | 338         | 9           | 3             | 25             | 24           |
| 227289       | Gpbar1      | 27         | 15           | 22            | 233         | 25          | 18            | 21             | 134          |
| 227290       | Aamp        | 119        | 770          | 2282          | 12460       | 101         | 659           | 1738           | 9941         |
| 227292       | Ctdsp1      | 175        | 1844         | 367           | 2600        | 179         | 1275          | 250            | 2317         |
| 227298       | Bc038286    | 103        | 352          | 816           | 1204        | 93          | 314           | 674            | 1049         |
| 227325       | Dner        | 7          | 3            | 81            | 21          | 6           | 3             | 76             | 17           |
| 227327       | B3gnt7      | 19         | 9            | 21            | 33          | 21          | 12            | 27             | 46           |
| 227331       | Tnrc15      | 171        | 120          | 117           | 1095        | 152         | 50            | 103            | 928          |
| 227334       | Usp40       | 43         | 66           | 46            | 115         | 44          | 56            | 49             | 85           |
| 227377       | Farp2       | 9          | 31           | 49            | 40          | 7           | 16            | 43             | 49           |
| 227394       | Slco4c1     | 4          | 2            | 23            | 19          | 4           | 3             | 25             | 17           |
| 227522       | Rpp38       | 44         | 167          | 208           | 495         | 41          | 165           | 186            | 458          |
| 227525       | Dclre1c     | 32         | 73           | 45            | 323         | 48          | 105           | 58             | 523          |
| 227541       | Camk1d      | 76         | 47           | 192           | 3275        | 79          | 27            | 224            | 3496         |
| 227580       | C1qI3       | 6          | 11           | 23            | 53          | 6           | 6             | 23             | 47           |
| 227615       | 730025p13r  | 122        | 285          | 416           | 1551        | 97          | 258           | 443            | 1553         |
| 227620       | Uap1I1      | 24         | 99           | 108           | 393         | 65          | 348           | 355            | 1457         |
| 227644       | Snopc4      | 68         | 1757         | 466           | 311         | 66          | 1457          | 351            | 274          |
| 227659       | Slc2a6      | 21         | 8            | 25            | 51          | 42          | 77            | 190            | 134          |
| 227671       | Gbgt1       | 6          | 11           | 34            | 53          | 6           | 13            | 35             | 73           |
| 227674       | Ddx31       | 51         | 325          | 156           | 1938        | 42          | 211           | 114            | 1686         |
| 227683       | Coq4        | 25         | 54           | 31            | 141         | 27          | 98            | 36             | 222          |
| 227699       | Nup188      | 94         | 55           | 31            | 40          | 90          | 65            | 30             | 32           |
| 227700       | Sh3glb2     | 69         | 757          | 686           | 2015        | 59          | 533           | 415            | 1217         |
| 227715       | Exosc2      | 46         | 680          | 391           | 2046        | 43          | 494           | 343            | 1288         |
| 227731       | Slc25a25    | 34         | 338          | 105           | 388         | 32          | 311           | 98             | 415          |
| 227733       | Pip5kl1     | 7          | 3            | 24            | 73          | 7           | 4             | 23             | 67           |
| 227738       | Lrsam1      | 19         | 39           | 122           | 219         | 23          | 36            | 148            | 360          |
| 227743       | Mapkap1     | 92         | 125          | 573           | 3255        | 97          | 139           | 534            | 2447         |
| 227753       | Gsn         | 53         | 1741         | 28            | 395         | 69          | 2004          | 30             | 427          |
| 227800       | Rabgap1     | 152        | 96           | 1174          | 4153        | 149         | 111           | 1125           | 5166         |
| 227867       | Epc2        | 138        | 320          | 562           | 661         | 143         | 379           | 599            | 564          |
| 227929       | Pscdbp      | 802        | 7003         | 10594         | 12860       | 361         | 2781          | 5115           | 6351         |

| NCBI Gene ID | Gene Symbol | Affy. CD4+ | Agilent CD4+ | Illumina CD4+ | Nimbl. CD4+ | Affy. CD19+ | Agilent CD19+ | Illumina CD19+ | Nimbl. CD19+ |
|--------------|-------------|------------|--------------|---------------|-------------|-------------|---------------|----------------|--------------|
| 227937       | Pkp4        | 20         | 114          | 46            | 485         | 12          | 17            | 26             | 49           |
| 227960       | Gca         | 5          | 4            | 34            | 20          | 7           | 7             | 42             | 58           |
| 227998       | 333409g03r  | 4          | 5            | 32            | 34          | 5           | 3             | 30             | 34           |
| 228012       | Tlk1        | 197        | 437          | 1153          | 3291        | 138         | 241           | 936            | 1895         |
| 228026       | Pdk1        | 254        | 1629         | 1270          | 5657        | 50          | 326           | 251            | 1342         |
| 228033       | Atp5g3      | 333        | 9083         | 6334          | 26583       | 304         | 7594          | 5524           | 23892        |
| 228061       | Agps        | 76         | 527          | 168           | 1305        | 81          | 647           | 175            | 956          |
| 228071       | Sestd1      | 12         | 35           | 58            | 409         | 5           | 11            | 28             | 39           |
| 228136       | Zdhhc5      | 159        | 409          | 115           | 178         | 196         | 498           | 142            | 204          |
| 228139       | P2rx3       | 6          | 32           | 33            | 23          | 7           | 33            | 34             | 44           |
| 228140       | Tnks1bp1    | 36         | 83           | 53            | 218         | 38          | 56            | 47             | 242          |
| 228228       | Olf1102     | 4          | 2            | 23            | 18          | 4           | 3             | 16             | 15           |
| 228355       | Madd        | 207        | 1445         | 40            | 7600        | 85          | 462           | 28             | 2914         |
| 228357       | Lrp4        | 9          | 4            | 31            | 17          | 8           | 4             | 22             | 15           |
| 228359       | Arhgap1     | 312        | 460          | 576           | 3526        | 119         | 167           | 194            | 1127         |
| 228361       | 330051n19r  | 177        | 365          | 259           | 1068        | 152         | 179           | 175            | 760          |
| 228366       | Gylt1b      | 10         | 16           | 24            | 38          | 10          | 14            | 24             | 45           |
| 228368       | Slc35c1     | 59         | 3499         | 1881          | 367         | 57          | 3098          | 1526           | 350          |
| 228410       | Cstf3       | 60         | 531          | 388           | 2908        | 71          | 626           | 432            | 2952         |
| 228413       | Prrg4       | 10         | 16           | 26            | 89          | 12          | 34            | 30             | 97           |
| 228421       | Kif18a      | 6          | 8            | 27            | 91          | 9           | 24            | 31             | 178          |
| 228543       | Rhov        | 6          | 11           | 20            | 36          | 7           | 12            | 22             | 42           |
| 228545       | Vps18       | 41         | 158          | 356           | 1447        | 69          | 325           | 657            | 3158         |
| 228550       | Itpka       | 6          | 56           | 37            | 198         | 6           | 57            | 44             | 251          |
| 228592       | 330045p16r  | 5          | 2            | 19            | 15          | 5           | 3             | 18             | 31           |
| 228598       | Ebf4        | 9          | 20           | 47            | 82          | 9           | 24            | 44             | 98           |
| 228607       | 430028g21r  | 56         | 312          | 197           | 205         | 99          | 500           | 280            | 313          |
| 228608       | Smox        | 28         | 137          | 157           | 241         | 12          | 6             | 27             | 64           |
| 228662       | Btbd3       | 8          | 2            | 30            | 52          | 8           | 6             | 27             | 56           |
| 228714       | Csrp2bp     | 89         | 643          | 758           | 415         | 86          | 682           | 745            | 300          |
| 228731       | Nkx2-4      | 27         | 68           | 21            | 257         | 27          | 63            | 26             | 181          |
| 228756       | Cstl1       | 5          | 4            | 24            | 37          | 5           | 3             | 19             | 38           |
| 228765       | Sdcbp2      | 17         | 141          | 62            | 577         | 11          | 15            | 30             | 23           |
| 228769       | Psmf1       | 63         | 97           | 861           | 336         | 46          | 63            | 667            | 373          |
| 228775       | Trib3       | 24         | 108          | 118           | 98          | 18          | 23            | 35             | 53           |
| 228796       | Bpil3       | 6          | 20           | 22            | 69          | 7           | 30            | 21             | 156          |
| 228801       | U46068      | 6          | 13           | 19            | 23          | 6           | 11            | 22             | 27           |
| 228807       | Zfp341      | 26         | 160          | 133           | 487         | 30          | 214           | 149            | 846          |
| 228836       | Dlgap4      | 52         | 841          | 1196          | 1357        | 44          | 651           | 890            | 1401         |
| 228839       | Tgif2       | 87         | 585          | 33            | 534         | 84          | 315           | 36             | 487          |
| 228850       | 330339m05r  | 300        | 281          | 33            | 3891        | 292         | 182           | 30             | 2744         |
| 228852       | Ppp1r16b    | 102        | 364          | 48            | 164         | 181         | 676           | 77             | 322          |
| 228858       | Gdap1l1     | 13         | 106          | 25            | 62          | 11          | 125           | 26             | 70           |
| 228866       | 730014i05r  | 128        | 137          | 372           | 986         | 127         | 210           | 332            | 1031         |
| 228869       | Ncoa5       | 101        | 156          | 613           | 175         | 103         | 145           | 751            | 185          |
| 228875       | Slc35c2     | 70         | 297          | 299           | 165         | 112         | 600           | 509            | 304          |
| 228876       | Zfp334      | 8          | 2            | 23            | 32          | 8           | 2             | 23             | 19           |
| 228889       | Ddx27       | 113        | 1524         | 337           | 467         | 113         | 1418          | 328            | 340          |
| 228913       | Zfp217      | 195        | 59           | 69            | 307         | 170         | 38            | 62             | 245          |
| 228942       | Cbln4       | 11         | 4            | 29            | 31          | 11          | 4             | 31             | 32           |
| 228960       | Stx16       | 84         | 53           | 26            | 1383        | 107         | 63            | 32             | 1698         |



| NCBI Gene ID | Gene Symbol | Affy. CD4+ | Agilent CD4+ | Illumina CD4+ | Nimbl. CD4+ | Affy. CD19+ | Agilent CD19+ | Illumina CD19+ | Nimbl. CD19+ |
|--------------|-------------|------------|--------------|---------------|-------------|-------------|---------------|----------------|--------------|
| 228961       | Npepl1      | 93         | 544          | 315           | 162         | 117         | 577           | 337            | 125          |
| 228980       | Taf4a       | 185        | 1032         | 22            | 1727        | 188         | 709           | 24             | 1152         |
| 228983       | Osbp12      | 88         | 407          | 396           | 1313        | 101         | 476           | 428            | 2114         |
| 228993       | 700019h03r  | 101        | 1293         | 537           | 541         | 47          | 356           | 202            | 111          |
| 228994       | Ythdf1      | 92         | 320          | 658           | 17684       | 102         | 227           | 596            | 13980        |
| 228998       | Arfgap1     | 119        | 72           | 201           | 1267        | 123         | 100           | 193            | 1472         |
| 229003       | Bc006779    | 143        | 1734         | 890           | 898         | 363         | 3780          | 2123           | 1860         |
| 229004       | Gmeb2       | 92         | 133          | 291           | 516         | 93          | 102           | 280            | 463          |
| 229011       | Samd10      | 39         | 821          | 127           | 80          | 49          | 888           | 141            | 89           |
| 229096       | Ythdf3      | 254        | 145          | 386           | 1582        | 239         | 172           | 378            | 1576         |
| 229211       | Acad9       | 57         | 273          | 69            | 1617        | 78          | 357           | 90             | 2272         |
| 229214       | Gpr103      | 7          | 4            | 24            | 25          | 8           | 3             | 23             | 38           |
| 229228       | Nudt6       | 44         | 7            | 541           | 4199        | 39          | 8             | 414            | 4055         |
| 229277       | Stoml3      | 6          | 9            | 23            | 28          | 5           | 10            | 23             | 58           |
| 229285       | Spg20       | 39         | 278          | 144           | 1181        | 28          | 194           | 111            | 945          |
| 229302       | Tm4sf4      | 6          | 42           | 20            | 26          | 6           | 47            | 23             | 30           |
| 229323       | Gpr171      | 50         | 649          | 879           | 2891        | 67          | 973           | 1118           | 3106         |
| 229357       | Gpr149      | 4          | 3            | 41            | 21          | 4           | 4             | 37             | 22           |
| 229363       | Gmps        | 120        | 118          | 111           | 272         | 117         | 105           | 100            | 122          |
| 229445       | Ctso        | 67         | 439          | 93            | 2546        | 180         | 945           | 154            | 4511         |
| 229487       | Pet112l     | 33         | 107          | 78            | 131         | 47          | 189           | 103            | 281          |
| 229521       | Syt11       | 39         | 292          | 578           | 2228        | 23          | 138           | 197            | 949          |
| 229534       | Pbxip1      | 73         | 5663         | 441           | 5117        | 84          | 5827          | 411            | 5612         |
| 229562       | Sprr4       | 8          | 10           | 22            | 63          | 8           | 11            | 23             | 58           |
| 229584       | Pogz        | 158        | 332          | 283           | 265         | 149         | 304           | 241            | 159          |
| 229615       | Pias3       | 20         | 2            | 136           | 50          | 41          | 153           | 258            | 107          |
| 229658       | Vangl1      | 8          | 17           | 34            | 44          | 7           | 12            | 36             | 33           |
| 229675       | Rsbn1       | 137        | 450          | 47            | 566         | 147         | 436           | 52             | 529          |
| 229681       | St7l        | 37         | 214          | 150           | 861         | 23          | 131           | 104            | 480          |
| 229687       | Bclp2       | 14         | 97           | 135           | 231         | 8           | 9             | 26             | 81           |
| 229699       | Slc16a4     | 7          | 2            | 21            | 390         | 7           | 3             | 22             | 345          |
| 229706       | Slc6a17     | 8          | 31           | 32            | 36          | 10          | 28            | 28             | 43           |
| 229709       | Ahcyl1      | 182        | 262          | 576           | 8011        | 163         | 199           | 615            | 5168         |
| 229714       | Gpr61       | 6          | 2            | 25            | 21          | 6           | 3             | 26             | 23           |
| 229731       | Slc25a24    | 14         | 77           | 67            | 139         | 11          | 27            | 47             | 98           |
| 229759       | Olfm3       | 6          | 13           | 32            | 25          | 6           | 14            | 29             | 19           |
| 229776       | Cdc14a      | 40         | 116          | 63            | 669         | 79          | 162           | 108            | 789          |
| 229782       | Slc35a3     | 53         | 33           | 515           | 233         | 57          | 30            | 584            | 147          |
| 229791       | 3bwbw0562i  | 6          | 3            | 19            | 46          | 6           | 3             | 21             | 30           |
| 229801       | Tram1l1     | 4          | 2            | 28            | 19          | 4           | 3             | 24             | 21           |
| 229841       | Cenpe       | 5          | 71           | 72            | 105         | 7           | 313           | 178            | 455          |
| 229877       | Rap1gds1    | 154        | 1408         | 1303          | 5942        | 128         | 1064          | 1016           | 4664         |
| 229898       | Gbp5        | 23         | 69           | 32            | 458         | 48          | 130           | 51             | 601          |
| 229906       | Gtf2b       | 145        | 966          | 80            | 3751        | 156         | 1086          | 70             | 3369         |
| 229927       | Clca4       | 8          | 2            | 21            | 36          | 9           | 3             | 20             | 29           |
| 229949       | Ak5         | 5          | 6            | 33            | 65          | 5           | 5             | 33             | 60           |
| 230073       | Ddx58       | 232        | 272          | 174           | 589         | 246         | 173           | 177            | 492          |
| 230082       | Nol6        | 88         | 277          | 646           | 677         | 87          | 284           | 587            | 992          |
| 230099       | Car9        | 9          | 85           | 38            | 71          | 7           | 74            | 40             | 91           |
| 230101       | Gba2        | 86         | 614          | 641           | 203         | 97          | 612           | 652            | 224          |
| 230103       | Npr2        | 5          | 8            | 24            | 24          | 7           | 17            | 61             | 31           |

| NCBI Gene ID | Gene Symbol | Affy. CD4+ | Agilent CD4+ | Illumina CD4+ | Nimbl. CD4+ | Affy. CD19+ | Agilent CD19+ | Illumina CD19+ | Nimbl. CD19+ |
|--------------|-------------|------------|--------------|---------------|-------------|-------------|---------------|----------------|--------------|
| 230119       | Zbtb5       | 63         | 286          | 234           | 193         | 74          | 549           | 402            | 308          |
| 230125       | Mcart1      | 107        | 150          | 30            | 225         | 95          | 132           | 29             | 150          |
| 230145       | Galnt12     | 73         | 1584         | 269           | 1937        | 50          | 763           | 133            | 1216         |
| 230157       | Tmeff1      | 6          | 3            | 25            | 67          | 6           | 3             | 25             | 51           |
| 230163       | Aldob       | 5          | 2            | 32            | 28          | 6           | 3             | 28             | 48           |
| 230233       | Ikbkap      | 76         | 261          | 262           | 744         | 83          | 297           | 320            | 1008         |
| 230249       | Ai314180    | 120        | 277          | 665           | 890         | 128         | 276           | 780            | 799          |
| 230257       | Rod1        | 835        | 1005         | 2295          | 17264       | 1096        | 1318          | 2853           | 22772        |
| 230393       | Bc057079    | 49         | 196          | 553           | 418         | 20          | 56            | 198            | 100          |
| 230396       | Ifna13      | 5          | 77           | 26            | 22          | 4           | 78            | 23             | 24           |
| 230484       | Usp1        | 64         | 755          | 678           | 466         | 70          | 734           | 681            | 510          |
| 230500       | Bc020077    | 8          | 18           | 18            | 62          | 8           | 25            | 17             | 56           |
| 230587       | Glis1       | 15         | 5            | 28            | 298         | 13          | 3             | 30             | 442          |
| 230594       | Zcchc11     | 238        | 449          | 27            | 2093        | 558         | 842           | 34             | 3897         |
| 230597       | Zfyve9      | 4          | 3            | 30            | 81          | 5           | 7             | 73             | 79           |
| 230598       | Nrd1        | 329        | 337          | 1931          | 997         | 349         | 284           | 1989           | 1168         |
| 230612       | Slc5a9      | 12         | 3            | 29            | 35          | 11          | 3             | 25             | 37           |
| 230613       | J30001h23r  | 4          | 3            | 25            | 24          | 4           | 3             | 25             | 41           |
| 230649       | Atpaf1      | 74         | 454          | 31            | 202         | 49          | 462           | 29             | 157          |
| 230661       | Tesk2       | 24         | 59           | 26            | 270         | 37          | 111           | 39             | 370          |
| 230673       | Ipo13       | 65         | 422          | 584           | 173         | 85          | 474           | 726            | 261          |
| 230674       | Jmjd2a      | 192        | 471          | 27            | 557         | 218         | 521           | 28             | 749          |
| 230676       | Bc059842    | 155        | 622          | 81            | 295         | 151         | 815           | 76             | 345          |
| 230709       | Zmpste24    | 120        | 416          | 398           | 601         | 103         | 358           | 376            | 430          |
| 230721       | Pabpc4      | 165        | 860          | 1199          | 1668        | 218         | 1314          | 1477           | 1782         |
| 230737       | Gnl2        | 60         | 820          | 552           | 1561        | 69          | 794           | 576            | 1765         |
| 230751       | J10007p19r  | 12         | 12           | 30            | 45          | 11          | 9             | 33             | 82           |
| 230753       | Thrap3      | 394        | 2486         | 41            | 11693       | 378         | 1879          | 38             | 10780        |
| 230770       | Tmem39b     | 41         | 55           | 140           | 32          | 50          | 98            | 174            | 54           |
| 230775       | Bai2        | 13         | 13           | 36            | 65          | 10          | 13            | 32             | 66           |
| 230777       | Hcrtr1      | 8          | 13           | 24            | 28          | 9           | 21            | 27             | 30           |
| 230784       | Sesn2       | 14         | 165          | 37            | 61          | 13          | 245           | 32             | 93           |
| 230787       | Bc013712    | 11         | 20           | 37            | 47          | 253         | 4074          | 317            | 458          |
| 230796       | Wdtdc1      | 61         | 152          | 41            | 120         | 54          | 140           | 37             | 124          |
| 230810       | Slc30a2     | 8          | 4            | 21            | 44          | 7           | 3             | 23             | 118          |
| 230815       | Man1c1      | 22         | 79           | 76            | 182         | 12          | 32            | 27             | 52           |
| 230828       | Il22ra1     | 7          | 18           | 25            | 137         | 8           | 18            | 24             | 165          |
| 230857       | Ece1        | 51         | 663          | 244           | 325         | 32          | 364           | 116            | 200          |
| 230861       | Eif4g3      | 238        | 3795         | 1297          | 3797        | 228         | 3189          | 1094           | 3405         |
| 230899       | Nppa        | 12         | 35           | 40            | 38          | 12          | 26            | 37             | 32           |
| 230903       | Fbxo44      | 12         | 2            | 33            | 463         | 12          | 3             | 53             | 480          |
| 230904       | Fbxo2       | 6          | 2278         | 30            | 52          | 7           | 1989          | 35             | 58           |
| 230908       | Tardbp      | 129        | 547          | 70            | 18292       | 131         | 409           | 94             | 16265        |
| 230935       | Dnajc11     | 64         | 130          | 45            | 264         | 67          | 135           | 51             | 279          |
| 230936       | Phf13       | 47         | 501          | 89            | 2614        | 40          | 265           | 66             | 1403         |
| 230967       | Bc046331    | 43         | 30           | 139           | 209         | 56          | 47            | 197            | 424          |
| 230979       | Tnfrsf14    | 107        | 42           | 45            | 82          | 65          | 17            | 37             | 63           |
| 230991       | J30041f14r  | 19         | 31           | 283           | 225         | 14          | 14            | 57             | 193          |
| 231042       | Nupl2       | 21         | 20           | 111           | 907         | 24          | 39            | 144            | 1185         |
| 231044       | Gbx1        | 14         | 39           | 24            | 53          | 12          | 29            | 28             | 39           |
| 231050       | Galnt11     | 75         | 312          | 431           | 874         | 98          | 474           | 597            | 933          |

| NCBI Gene ID | Gene Symbol | Affy. CD4+ | Agilent CD4+ | Illumina CD4+ | Nimbl. CD4+ | Affy. CD19+ | Agilent CD19+ | Illumina CD19+ | Nimbl. CD19+ |
|--------------|-------------|------------|--------------|---------------|-------------|-------------|---------------|----------------|--------------|
| 231070       | Insig1      | 145        | 35           | 29            | 45          | 96          | 28            | 28             | 38           |
| 231086       | Hadhb       | 161        | 933          | 1477          | 2293        | 118         | 701           | 1202           | 1808         |
| 231103       | Gckr        | 7          | 12           | 29            | 27          | 8           | 7             | 27             | 26           |
| 231125       | Zfyve28     | 12         | 15           | 39            | 267         | 11          | 13            | 33             | 174          |
| 231130       | Tnip2       | 27         | 147          | 45            | 471         | 33          | 235           | 49             | 707          |
| 231147       | Sh3tc1      | 13         | 19           | 28            | 64          | 52          | 762           | 40             | 248          |
| 231148       | Ablim2      | 22         | 61           | 27            | 81          | 17          | 45            | 26             | 39           |
| 231201       | Af366264    | 7          | 20           | 29            | 22          | 7           | 21            | 30             | 23           |
| 231207       | Cpeb2       | 36         | 11           | 48            | 66          | 37          | 8             | 43             | 59           |
| 231252       | Chrna9      | 6          | 3            | 40            | 50          | 6           | 3             | 43             | 45           |
| 231253       | 130230l23r  | 7          | 8            | 33            | 70          | 7           | 4             | 32             | 78           |
| 231287       | Atp10d      | 209        | 408          | 952           | 3062        | 200         | 358           | 933            | 1931         |
| 231326       | 230062g08r  | 22         | 118          | 254           | 734         | 31          | 226           | 475            | 1328         |
| 231327       | Ppat        | 96         | 210          | 164           | 961         | 69          | 181           | 110            | 698          |
| 231329       | Polr2b      | 168        | 739          | 23            | 1835        | 221         | 917           | 20             | 2076         |
| 231413       | Grsf1       | 100        | 382          | 442           | 460         | 103         | 325           | 379            | 353          |
| 231452       | Sdad1       | 72         | 867          | 447           | 2411        | 86          | 993           | 427            | 1960         |
| 231464       | Cnot6l      | 536        | 1611         | 231           | 5884        | 409         | 918           | 164            | 2659         |
| 231470       | Fras1       | 6          | 4            | 34            | 46          | 7           | 7             | 27             | 30           |
| 231474       | Paqr3       | 8          | 3            | 24            | 56          | 7           | 5             | 24             | 70           |
| 231507       | Plac8       | 7          | 11           | 29            | 55          | 327         | 8932          | 3473           | 10072        |
| 231532       | Arhgap24    | 10         | 11           | 31            | 103         | 62          | 337           | 348            | 1278         |
| 231580       | Gak         | 307        | 927          | 640           | 153         | 243         | 747           | 524            | 125          |
| 231583       | Slc26a1     | 8          | 6            | 22            | 26          | 7           | 5             | 24             | 22           |
| 231600       | Chfr        | 144        | 558          | 43            | 241         | 130         | 501           | 38             | 151          |
| 231602       | P2rx2       | 7          | 110          | 27            | 56          | 6           | 100           | 25             | 34           |
| 231605       | Galnt9      | 16         | 62           | 36            | 306         | 9           | 8             | 30             | 81           |
| 231630       | D5ertd40e   | 12         | 23           | 48            | 237         | 15          | 21            | 39             | 242          |
| 231637       | Ssh1        | 107        | 397          | 78            | 748         | 153         | 470           | 103            | 718          |
| 231655       | Oasl1       | 46         | 139          | 74            | 436         | 71          | 306           | 145            | 828          |
| 231659       | Gcn1l1      | 123        | 394          | 65            | 814         | 123         | 380           | 55             | 828          |
| 231668       | Bc023744    | 30         | 4            | 37            | 37          | 27          | 3             | 37             | 45           |
| 231670       | Fbxo21      | 81         | 530          | 284           | 427         | 67          | 401           | 216            | 232          |
| 231691       | Sds         | 7          | 8            | 32            | 33          | 7           | 9             | 32             | 28           |
| 231699       | Oas1e       | 5          | 100          | 23            | 24          | 4           | 107           | 21             | 23           |
| 231724       | Rad9b       | 32         | 2            | 47            | 54          | 37          | 7             | 58             | 68           |
| 231727       | B3gnt4      | 19         | 4            | 24            | 135         | 20          | 5             | 23             | 190          |
| 231769       | Sfrs8       | 128        | 1604         | 34            | 2174        | 129         | 1257          | 37             | 2107         |
| 231798       | Lrch4       | 321        | 1331         | 31            | 2930        | 300         | 982           | 31             | 4530         |
| 231801       | Hrbl        | 75         | 458          | 634           | 2680        | 56          | 304           | 374            | 851          |
| 231805       | Pilra       | 6          | 3            | 27            | 21          | 8           | 4             | 27             | 28           |
| 231821       | Centa1      | 11         | 81           | 33            | 154         | 29          | 113           | 56             | 275          |
| 231834       | Snx8        | 12         | 32           | 60            | 173         | 186         | 2163          | 2244           | 4752         |
| 231841       | Aa881470    | 62         | 271          | 800           | 216         | 51          | 148           | 695            | 197          |
| 231842       | 530401c20r  | 28         | 191          | 56            | 200         | 27          | 126           | 44             | 148          |
| 231858       | 330005d10r  | 11         | 11           | 35            | 100         | 12          | 8             | 31             | 151          |
| 231863       | Fbxl18      | 25         | 5            | 34            | 47          | 29          | 12            | 38             | 39           |
| 231868       | l30309d02r  | 13         | 157          | 61            | 164         | 13          | 150           | 62             | 186          |
| 231872       | Jtv1        | 59         | 28           | 207           | 2087        | 56          | 19            | 157            | 1970         |
| 231874       | Au022870    | 55         | 597          | 516           | 1278        | 97          | 930           | 860            | 1880         |
| 231876       | Lmtk2       | 80         | 26           | 296           | 2841        | 99          | 20            | 396            | 2225         |

| NCBI Gene ID | Gene Symbol | Affy. CD4+ | Agilent CD4+ | Illumina CD4+ | Nimbl. CD4+ | Affy. CD19+ | Agilent CD19+ | Illumina CD19+ | Nimbl. CD19+ |
|--------------|-------------|------------|--------------|---------------|-------------|-------------|---------------|----------------|--------------|
| 231887       | Pdap1       | 58         | 935          | 332           | 785         | 50          | 874           | 296            | 869          |
| 231912       | Katnal1     | 17         | 4            | 29            | 106         | 19          | 4             | 30             | 167          |
| 231991       | Creb5       | 11         | 2            | 21            | 31          | 14          | 3             | 25             | 42           |
| 231997       | Fkbp14      | 6          | 2            | 35            | 35          | 6           | 4             | 30             | 41           |
| 232023       | Aw146242    | 36         | 1236         | 244           | 1094        | 13          | 339           | 85             | 233          |
| 232087       | Mat2a       | 404        | 4826         | 516           | 21443       | 417         | 5718          | 509            | 20912        |
| 232174       | Cyp26b1     | 19         | 13           | 23            | 229         | 18          | 10            | 27             | 211          |
| 232187       | Smyd5       | 28         | 37           | 48            | 27          | 41          | 52            | 48             | 28           |
| 232201       | Arhgap25    | 183        | 2489         | 28            | 2254        | 340         | 5013          | 29             | 3289         |
| 232217       | 33427d06r   | 6          | 2            | 20            | 38          | 7           | 3             | 21             | 26           |
| 232223       | Txnrd3      | 9          | 80           | 49            | 144         | 11          | 112           | 65             | 222          |
| 232232       | Hdac11      | 9          | 5            | 33            | 333         | 10          | 10            | 58             | 506          |
| 232236       | l30022k22r  | 55         | 406          | 375           | 4694        | 48          | 521           | 370            | 3016         |
| 232237       | Fgd5        | 11         | 2            | 35            | 23          | 13          | 3             | 34             | 20           |
| 232288       | Frmd4b      | 7          | 19           | 36            | 41          | 7           | 4             | 27             | 22           |
| 232314       | Ppp4r2      | 240        | 2450         | 519           | 14651       | 172         | 1687          | 460            | 10000        |
| 232333       | Slc6a1      | 11         | 3            | 23            | 29          | 10          | 4             | 25             | 30           |
| 232334       | Vgll4       | 131        | 44           | 271           | 10089       | 80          | 24            | 132            | 6106         |
| 232337       | Zfp637      | 21         | 541          | 646           | 667         | 22          | 620           | 678            | 682          |
| 232345       | A2m         | 8          | 9            | 23            | 48          | 8           | 11            | 18             | 58           |
| 232370       | Clstn3      | 7          | 101          | 47            | 85          | 7           | 76            | 40             | 79           |
| 232371       | C1rl        | 10         | 56           | 33            | 24          | 10          | 40            | 31             | 21           |
| 232426       | 530400c23r  | 5          | 3            | 15            | 27          | 5           | 3             | 18             | 20           |
| 232441       | Rerg        | 4          | 4            | 22            | 27          | 5           | 10            | 27             | 60           |
| 232493       | Gys2        | 6          | 2            | 25            | 27          | 6           | 2             | 23             | 24           |
| 232533       | Stk38l      | 44         | 162          | 20            | 456         | 38          | 158           | 22             | 295          |
| 232536       | Mrps35      | 38         | 201          | 368           | 2842        | 46          | 174           | 295            | 2510         |
| 232784       | Zfp212      | 77         | 639          | 172           | 2483        | 72          | 577           | 146            | 2228         |
| 232790       | Oscar       | 8          | 99           | 27            | 42          | 9           | 75            | 30             | 33           |
| 232791       | Cnot3       | 181        | 463          | 140           | 155         | 168         | 459           | 115            | 111          |
| 232798       | Leng8       | 197        | 212          | 46            | 77          | 218         | 306           | 44             | 113          |
| 232807       | Ppp1r12c    | 109        | 2570         | 42            | 245         | 92          | 2164          | 35             | 245          |
| 232811       | Suv420h2    | 136        | 142          | 338           | 194         | 154         | 180           | 368            | 180          |
| 232836       | Galp        | 14         | 19           | 25            | 22          | 17          | 11            | 20             | 19           |
| 232889       | Pla2g4c     | 5          | 29           | 34            | 21          | 6           | 33            | 30             | 27           |
| 232934       | P42pop      | 27         | 22           | 32            | 233         | 24          | 19            | 35             | 57           |
| 232944       | Mark4       | 56         | 339          | 47            | 180         | 47          | 308           | 43             | 246          |
| 232946       | Bloc1s3     | 53         | 34           | 75            | 910         | 54          | 42            | 79             | 1072         |
| 232966       | Zfp114      | 5          | 27           | 21            | 35          | 5           | 32            | 24             | 34           |
| 232975       | Atp1a3      | 10         | 18           | 39            | 39          | 9           | 12            | 34             | 51           |
| 232976       | Zfp574      | 62         | 478          | 638           | 99          | 56          | 495           | 537            | 97           |
| 232983       | Bc024561    | 13         | 3            | 23            | 33          | 11          | 3             | 23             | 35           |
| 232989       | Hnrpul1     | 331        | 2356         | 62            | 16454       | 318         | 2286          | 68             | 16335        |
| 233011       | Itpkc       | 40         | 211          | 233           | 379         | 45          | 169           | 223            | 224          |
| 233016       | Blvrb       | 36         | 25           | 45            | 127         | 106         | 354           | 268            | 1303         |
| 233040       | Fbxo27      | 17         | 112          | 61            | 248         | 14          | 90            | 30             | 109          |
| 233046       | Rasgrp4     | 19         | 100          | 50            | 264         | 18          | 1383          | 42             | 183          |
| 233066       | Ai428936    | 16         | 118          | 84            | 95          | 14          | 107           | 54             | 104          |
| 233067       | Lrfn3       | 6          | 19           | 25            | 46          | 6           | 21            | 25             | 41           |
| 233071       | Snx26       | 17         | 41           | 33            | 27          | 21          | 54            | 35             | 54           |
| 233073       | U2af1l4     | 72         | 266          | 175           | 3759        | 65          | 244           | 135            | 2808         |

| NCBI Gene ID | Gene Symbol | Affy. CD4+ | Agilent CD4+ | Illumina CD4+ | Nimbl. CD4+ | Affy. CD19+ | Agilent CD19+ | Illumina CD19+ | Nimbl. CD19+ |
|--------------|-------------|------------|--------------|---------------|-------------|-------------|---------------|----------------|--------------|
| 233099       | Abpb        | 3          | 3            | 27            | 18          | 4           | 5             | 22             | 27           |
| 233107       | Kctd15      | 10         | 32           | 26            | 73          | 10          | 32            | 24             | 38           |
| 233168       | Ai987944    | 14         | 143          | 25            | 1540        | 16          | 175           | 31             | 1732         |
| 233187       | Lim2        | 10         | 5            | 20            | 50          | 10          | 6             | 19             | 43           |
| 233199       | Mybpc2      | 9          | 2            | 20            | 116         | 14          | 195           | 85             | 260          |
| 233204       | Tbc1d17     | 81         | 595          | 152           | 564         | 109         | 650           | 166            | 886          |
| 233208       | Ai480556    | 86         | 80           | 322           | 166         | 81          | 70            | 271            | 187          |
| 233221       | Mrgpra1     | 5          | 2            | 22            | 24          | 6           | 3             | 26             | 37           |
| 233222       | Mrgpra3     | 5          | 21           | 29            | 19          | 6           | 21            | 28             | 20           |
| 233231       | Mrgprb1     | 5          | 2            | 21            | 20          | 5           | 3             | 20             | 20           |
| 233271       | Luzp2       | 5          | 4            | 31            | 38          | 5           | 6             | 33             | 59           |
| 233276       | Tubgcp5     | 48         | 158          | 29            | 499         | 59          | 178           | 34             | 480          |
| 233280       | Nipa1       | 5          | 10           | 40            | 35          | 6           | 7             | 33             | 23           |
| 233328       | Lrrk1       | 11         | 4            | 29            | 57          | 62          | 71            | 423            | 909          |
| 233335       | Dmn         | 8          | 7            | 38            | 68          | 9           | 7             | 46             | 125          |
| 233405       | Vps33b      | 73         | 630          | 136           | 1537        | 83          | 667           | 126            | 1468         |
| 233406       | Prc1        | 7          | 89           | 102           | 92          | 7           | 161           | 220            | 168          |
| 233410       | Zfp592      | 265        | 1214         | 364           | 1251        | 263         | 1115          | 376            | 1320         |
| 233424       | Tmc3        | 9          | 6            | 27            | 24          | 9           | 3             | 31             | 25           |
| 233489       | Picalm      | 395        | 1018         | 371           | 4153        | 363         | 694           | 289            | 3487         |
| 233545       | 10018m11    | 155        | 1223         | 3100          | 2839        | 131         | 748           | 2064           | 2407         |
| 233549       | Mogat2      | 9          | 7            | 29            | 20          | 8           | 7             | 28             | 27           |
| 233571       | P2ry6       | 7          | 3            | 125           | 217         | 7           | 3             | 117            | 171          |
| 233575       | Frag1       | 67         | 84           | 80            | 536         | 80          | 113           | 84             | 542          |
| 233726       | Ipo7        | 165        | 437          | 355           | 203         | 200         | 416           | 393            | 120          |
| 233733       | Galnt14     | 6          | 4            | 21            | 46          | 7           | 7             | 19             | 69           |
| 233744       | Spon1       | 11         | 14           | 25            | 2097        | 12          | 16            | 25             | 1666         |
| 233765       | Plekha7     | 18         | 22           | 55            | 1825        | 11          | 13            | 22             | 257          |
| 233781       | Xylt1       | 80         | 37           | 38            | 64          | 322         | 45            | 76             | 127          |
| 233789       | 610207i05r  | 528        | 1261         | 30            | 4475        | 512         | 1124          | 28             | 2952         |
| 233810       | Abca16      | 4          | 2            | 37            | 16          | 4           | 3             | 33             | 20           |
| 233813       | 30013g06r   | 6          | 18           | 30            | 21          | 6           | 19            | 29             | 21           |
| 233824       | Cog7        | 34         | 99           | 37            | 4401        | 36          | 127           | 37             | 6367         |
| 233836       | Slc5a11     | 10         | 10           | 25            | 83          | 10          | 7             | 25             | 81           |
| 233863       | Gtf3c1      | 129        | 1144         | 602           | 418         | 111         | 1053          | 501            | 401          |
| 233865       | 430042o09r  | 54         | 150          | 244           | 204         | 51          | 186           | 267            | 349          |
| 233870       | Tufm        | 90         | 1723         | 963           | 1208        | 104         | 1831          | 967            | 1251         |
| 233877       | Kctd13      | 71         | 137          | 354           | 848         | 70          | 127           | 329            | 728          |
| 233887       | Zfp553      | 51         | 278          | 92            | 217         | 47          | 254           | 84             | 250          |
| 233900       | Rnf40       | 116        | 542          | 604           | 485         | 95          | 368           | 482            | 465          |
| 233902       | Fbxl19      | 23         | 21           | 32            | 547         | 39          | 74            | 42             | 1447         |
| 233908       | Fus         | 235        | 1135         | 146           | 2807        | 247         | 870           | 128            | 2312         |
| 233912       | Armc5       | 42         | 369          | 697           | 989         | 46          | 425           | 634            | 1375         |
| 233919       | Gpr26       | 12         | 5            | 23            | 21          | 10          | 12            | 24             | 16           |
| 233979       | Tpcn2       | 65         | 83           | 60            | 327         | 66          | 89            | 46             | 381          |
| 234023       | 130010o03r  | 126        | 5087         | 2342          | 2730        | 123         | 6299          | 2137           | 2260         |
| 234072       | Adprhl1     | 7          | 45           | 25            | 27          | 7           | 30            | 28             | 39           |
| 234094       | Arhgef10    | 7          | 39           | 139           | 239         | 7           | 41            | 94             | 152          |
| 234129       | Tpte        | 4          | 10           | 24            | 32          | 4           | 9             | 25             | 37           |
| 234130       | Dkk4        | 9          | 2            | 27            | 45          | 9           | 3             | 28             | 29           |
| 234135       | Whsc111     | 551        | 337          | 1750          | 16954       | 278         | 192           | 980            | 8796         |

| NCBI Gene ID | Gene Symbol | Affy. CD4+ | Agilent CD4+ | Illumina CD4+ | Nimbl. CD4+ | Affy. CD19+ | Agilent CD19+ | Illumina CD19+ | Nimbl. CD19+ |
|--------------|-------------|------------|--------------|---------------|-------------|-------------|---------------|----------------|--------------|
| 234199       | Fgl1        | 5          | 328          | 24            | 49          | 5           | 378           | 25             | 51           |
| 234219       | Helt        | 5          | 6            | 21            | 96          | 6           | 3             | 17             | 87           |
| 234267       | Gpm6a       | 5          | 8            | 40            | 21          | 5           | 12            | 38             | 39           |
| 234356       | 732435n03r  | 7          | 6            | 26            | 102         | 6           | 3             | 18             | 37           |
| 234373       | Sfrs14      | 83         | 203          | 1074          | 810         | 80          | 254           | 1071           | 761          |
| 234395       | Ushbp1      | 13         | 6            | 22            | 52          | 12          | 3             | 24             | 54           |
| 234404       | Txn16       | 9          | 2            | 24            | 91          | 9           | 3             | 29             | 49           |
| 234407       | Glt25d1     | 74         | 274          | 519           | 3312        | 165         | 591           | 1256           | 7952         |
| 234463       | Tmem34      | 72         | 579          | 93            | 10002       | 86          | 487           | 84             | 8085         |
| 234515       | Inpp4b      | 655        | 678          | 235           | 1217        | 73          | 52            | 39             | 123          |
| 234564       | Au018778    | 5          | 2            | 30            | 35          | 4           | 3             | 21             | 33           |
| 234577       | Cpne2       | 10         | 12           | 21            | 303         | 9           | 9             | 18             | 171          |
| 234593       | Ndrp4       | 10         | 12           | 32            | 74          | 11          | 12            | 31             | 77           |
| 234595       | Bc031853    | 38         | 119          | 81            | 343         | 43          | 132           | 89             | 419          |
| 234663       | Dync1li2    | 107        | 390          | 109           | 577         | 105         | 427           | 117            | 569          |
| 234664       | Appbp1      | 62         | 877          | 908           | 2366        | 71          | 837           | 962            | 1797         |
| 234671       | Ces2        | 7          | 15           | 21            | 36          | 7           | 12            | 23             | 18           |
| 234678       | 230025d16r  | 59         | 114          | 296           | 129         | 54          | 89            | 313            | 108          |
| 234683       | Elmo3       | 16         | 139          | 237           | 153         | 15          | 89            | 157            | 154          |
| 234684       | Lrrc29      | 22         | 11           | 51            | 234         | 21          | 10            | 64             | 155          |
| 234686       | Fhod1       | 48         | 869          | 571           | 579         | 54          | 763           | 550            | 668          |
| 234723       | Txn14b      | 20         | 244          | 198           | 1549        | 20          | 296           | 217            | 1464         |
| 234724       | Tat         | 7          | 60           | 19            | 33          | 7           | 91            | 16             | 35           |
| 234730       | Fuk         | 43         | 415          | 193           | 368         | 42          | 343           | 171            | 356          |
| 234734       | Aars        | 62         | 824          | 524           | 25          | 64          | 994           | 549            | 41           |
| 234740       | 932417i16r  | 7          | 3            | 25            | 69          | 8           | 4             | 32             | 75           |
| 234779       | Plcg2       | 9          | 24           | 18            | 67          | 380         | 7314          | 2812           | 1552         |
| 234788       | Gm587       | 9          | 8            | 35            | 28          | 8           | 11            | 49             | 62           |
| 234825       | Klhdc4      | 36         | 501          | 566           | 1163        | 31          | 567           | 585            | 1060         |
| 234847       | Spg7        | 81         | 421          | 1174          | 281         | 74          | 345           | 1049           | 262          |
| 234854       | Cdk10       | 63         | 555          | 465           | 465         | 63          | 555           | 375            | 452          |
| 234857       | Spire2      | 13         | 5            | 28            | 53          | 12          | 5             | 28             | 69           |
| 234865       | Nup133      | 51         | 433          | 124           | 648         | 81          | 569           | 159            | 791          |
| 234875       | Ttc13       | 151        | 579          | 2196          | 1518        | 87          | 246           | 1297           | 706          |
| 234878       | Bc021891    | 7          | 59           | 31            | 52          | 6           | 58            | 28             | 111          |
| 234967       | Slc36a4     | 22         | 5            | 34            | 116         | 17          | 4             | 34             | 137          |
| 234988       | Mbd3l2      | 4          | 2            | 29            | 12          | 4           | 3             | 31             | 14           |
| 235028       | Zfp426      | 44         | 504          | 17            | 1357        | 48          | 488           | 19             | 1462         |
| 235036       | Ppan        | 56         | 1489         | 1043          | 766         | 50          | 1735          | 1093           | 899          |
| 235041       | Ankrd25     | 12         | 9            | 36            | 34          | 11          | 8             | 31             | 34           |
| 235044       | Bc018242    | 12         | 2            | 36            | 79          | 12          | 3             | 33             | 123          |
| 235072       | 7-Sep       | 172        | 1190         | 66            | 11921       | 120         | 836           | 67             | 7984         |
| 235106       | Hnt         | 5          | 7            | 24            | 63          | 5           | 10            | 23             | 50           |
| 235130       | Adamts15    | 6          | 3            | 43            | 15          | 6           | 3             | 45             | 19           |
| 235134       | Nfrkb       | 159        | 198          | 60            | 2763        | 137         | 122           | 60             | 2057         |
| 235180       | Fez1        | 8          | 3            | 25            | 24          | 8           | 3             | 27             | 23           |
| 235281       | Scn3b       | 6          | 12           | 36            | 21          | 6           | 12            | 33             | 41           |
| 235293       | Sc5d        | 101        | 442          | 72            | 2236        | 77          | 289           | 54             | 1105         |
| 235312       | C1qtnf5     | 18         | 20           | 27            | 135         | 18          | 20            | 29             | 129          |
| 235323       | Usp28       | 94         | 385          | 40            | 2760        | 42          | 182           | 25             | 1022         |
| 235330       | Ttc12       | 7          | 2            | 34            | 60          | 7           | 3             | 31             | 64           |

| NCBI Gene ID | Gene Symbol | Affy. CD4+ | Agilent CD4+ | Illumina CD4+ | Nimbl. CD4+ | Affy. CD19+ | Agilent CD19+ | Illumina CD19+ | Nimbl. CD19+ |
|--------------|-------------|------------|--------------|---------------|-------------|-------------|---------------|----------------|--------------|
| 235339       | Dlat        | 53         | 225          | 90            | 277         | 51          | 185           | 73             | 292          |
| 235416       | Lman1l      | 11         | 74           | 25            | 131         | 10          | 176           | 20             | 56           |
| 235431       | Coro2b      | 10         | 11           | 31            | 48          | 10          | 16            | 28             | 37           |
| 235435       | Lctl        | 7          | 2            | 18            | 76          | 6           | 3             | 18             | 62           |
| 235441       | Usp3        | 329        | 460          | 731           | 13527       | 149         | 180           | 391            | 8569         |
| 235442       | Rab8b       | 243        | 97           | 1656          | 837         | 182         | 72            | 1062           | 344          |
| 235459       | Gtf2a2      | 51         | 1207         | 26            | 19490       | 63          | 1111          | 20             | 17146        |
| 235461       | 230380d07r  | 76         | 902          | 157           | 5455        | 63          | 711           | 125            | 5565         |
| 235469       | Suhw4       | 101        | 231          | 20            | 3419        | 90          | 199           | 27             | 2179         |
| 235493       | Bc031353    | 87         | 177          | 816           | 1323        | 183         | 296           | 1595           | 2537         |
| 235504       | Slc17a5     | 42         | 37           | 50            | 64          | 39          | 24            | 42             | 93           |
| 235505       | Cd109       | 5          | 2            | 32            | 19          | 5           | 3             | 33             | 17           |
| 235527       | Plscr4      | 6          | 3            | 19            | 24          | 6           | 3             | 22             | 38           |
| 235559       | Topbp1      | 107        | 287          | 29            | 325         | 131         | 349           | 31             | 372          |
| 235567       | Dnajc13     | 296        | 137          | 294           | 519         | 336         | 138           | 355            | 504          |
| 235574       | Atp2c1      | 165        | 270          | 130           | 4805        | 228         | 389           | 174            | 4545         |
| 235582       | 230410p16r  | 21         | 68           | 60            | 154         | 23          | 51            | 51             | 110          |
| 235584       | Dusp7       | 241        | 1026         | 46            | 1084        | 179         | 538           | 41             | 1153         |
| 235606       | Apeh        | 103        | 1158         | 1207          | 1416        | 126         | 987           | 1339           | 1963         |
| 235610       | 520401k05r  | 51         | 532          | 169           | 385         | 52          | 510           | 167            | 390          |
| 235611       | Plxnb1      | 22         | 12           | 42            | 256         | 17          | 4             | 30             | 99           |
| 235623       | Scap        | 157        | 1988         | 426           | 662         | 140         | 1292          | 311            | 600          |
| 235628       | Tessp2      | 7          | 15           | 30            | 35          | 7           | 7             | 27             | 40           |
| 235631       | Tsp50       | 6          | 14           | 35            | 50          | 6           | 17            | 29             | 47           |
| 235682       | Zfp445      | 191        | 59           | 242           | 2565        | 193         | 44            | 258            | 2093         |
| 235712       | Mrgpra2     | 5          | 12           | 28            | 28          | 6           | 10            | 24             | 30           |
| 235907       | Zfp71-rs1   | 52         | 44           | 29            | 2480        | 58          | 48            | 30             | 3006         |
| 236082       | Dhrsx       | 74         | 168          | 223           | 1102        | 67          | 148           | 174            | 1306         |
| 236219       | Tcstv3      | 6          | 142          | 28            | 46          | 6           | 105           | 56             | 52           |
| 236266       | Alms1       | 12         | 20           | 42            | 43          | 19          | 29            | 56             | 48           |
| 236511       | Eif2c1      | 112        | 89           | 30            | 78          | 140         | 94            | 34             | 79           |
| 236537       | Zfp352      | 7          | 17           | 38            | 21          | 6           | 14            | 36             | 35           |
| 236539       | Phgdh       | 70         | 2520         | 112           | 2261        | 83          | 4035          | 112            | 3529         |
| 236690       | Nyx         | 9          | 55           | 26            | 39          | 11          | 18            | 50             | 105          |
| 236727       | Slc9a7      | 21         | 3            | 23            | 64          | 432         | 66            | 90             | 1298         |
| 236732       | Rbm10       | 90         | 2145         | 388           | 5075        | 92          | 2214          | 364            | 4919         |
| 236733       | Usp11       | 15         | 80           | 31            | 88          | 35          | 194           | 47             | 218          |
| 236781       | Gpr119      | 7          | 45           | 31            | 26          | 6           | 35            | 35             | 32           |
| 236792       | Tmem32      | 45         | 58           | 132           | 4120        | 41          | 64            | 135            | 2476         |
| 236794       | Slc9a6      | 99         | 70           | 185           | 199         | 60          | 30            | 140            | 78           |
| 236899       | Pcyt1b      | 6          | 5            | 29            | 47          | 6           | 9             | 30             | 65           |
| 236900       | Pdk3        | 41         | 88           | 149           | 310         | 47          | 117           | 173            | 422          |
| 236904       | Klhl15      | 27         | 31           | 54            | 36          | 30          | 37            | 54             | 30           |
| 236920       | Stard8      | 8          | 4            | 26            | 22          | 10          | 3             | 38             | 43           |
| 237010       | Klhl4       | 5          | 2            | 27            | 27          | 5           | 3             | 23             | 18           |
| 237038       | Nox1        | 5          | 2            | 20            | 52          | 5           | 3             | 25             | 55           |
| 237052       | Tceal1      | 5          | 3            | 20            | 130         | 6           | 3             | 23             | 167          |
| 237082       | Nxt2        | 22         | 5            | 192           | 262         | 27          | 8             | 262            | 409          |
| 237175       | Gpr64       | 4          | 2            | 26            | 35          | 4           | 3             | 28             | 42           |
| 237213       | Gfra2       | 4          | 5            | 27            | 17          | 5           | 10            | 29             | 17           |
| 237222       | Odf1        | 32         | 498          | 33            | 240         | 32          | 522           | 30             | 274          |

| NCBI Gene ID | Gene Symbol | Affy. CD4+ | Agilent CD4+ | Illumina CD4+ | Nimbl. CD4+ | Affy. CD19+ | Agilent CD19+ | Illumina CD19+ | Nimbl. CD19+ |
|--------------|-------------|------------|--------------|---------------|-------------|-------------|---------------|----------------|--------------|
| 237253       | Lrp11       | 11         | 7            | 42            | 43          | 10          | 6             | 39             | 58           |
| 237310       | Il22ra2     | 7          | 2            | 31            | 34          | 6           | 3             | 26             | 59           |
| 237320       | Aldh8a1     | 5          | 40           | 27            | 66          | 5           | 30            | 29             | 50           |
| 237336       | Tbpl1       | 67         | 573          | 25            | 389         | 77          | 584           | 25             | 132          |
| 237339       | L3mbtl3     | 197        | 201          | 218           | 1769        | 174         | 124           | 195            | 1356         |
| 237387       | Lrrc3       | 37         | 12           | 25            | 206         | 38          | 7             | 23             | 32           |
| 237436       | Gas2l3      | 9          | 4            | 29            | 18          | 12          | 5             | 38             | 20           |
| 237459       | Pctk2       | 225        | 280          | 46            | 3450        | 165         | 145           | 30             | 1738         |
| 237465       | Snrpf       | 205        | 2369         | 1997          | 21200       | 190         | 2116          | 1616           | 17913        |
| 237504       | Pamci       | 4          | 2            | 26            | 40          | 4           | 3             | 23             | 68           |
| 237523       | Ptprq       | 7          | 2            | 23            | 34          | 7           | 3             | 22             | 35           |
| 237542       | Osbpl8      | 161        | 54           | 30            | 1327        | 128         | 38            | 33             | 1341         |
| 237553       | Trhde       | 6          | 3            | 27            | 17          | 6           | 3             | 22             | 24           |
| 237560       | Lrrc10      | 6          | 11           | 44            | 57          | 5           | 8             | 48             | 51           |
| 237625       | Pla2g3      | 10         | 33           | 24            | 32          | 8           | 37            | 21             | 36           |
| 237636       | Npc1l1      | 11         | 4            | 29            | 58          | 10          | 4             | 26             | 50           |
| 237711       | 330094a16r  | 9          | 13           | 28            | 26          | 12          | 8             | 27             | 24           |
| 237716       | Gpr75       | 13         | 15           | 51            | 49          | 14          | 9             | 49             | 33           |
| 237759       | Col23a1     | 21         | 35           | 63            | 198         | 23          | 40            | 82             | 264          |
| 237775       | Bc050078    | 8          | 18           | 26            | 381         | 7           | 30            | 27             | 485          |
| 237782       | Smcr8       | 133        | 8            | 41            | 168         | 165         | 11            | 44             | 183          |
| 237831       | Slc13a5     | 5          | 20           | 46            | 21          | 6           | 21            | 42             | 25           |
| 237847       | Rtn4rl1     | 66         | 109          | 148           | 1616        | 17          | 6             | 35             | 77           |
| 237858       | Tusc5       | 14         | 2            | 45            | 14          | 14          | 2             | 44             | 16           |
| 237860       | Ssh2        | 422        | 1493         | 64            | 110         | 274         | 782           | 44             | 59           |
| 237868       | 830091i15r  | 6          | 5            | 30            | 42          | 7           | 9             | 28             | 47           |
| 237887       | Slfn10      | 47         | 471          | 33            | 4278        | 30          | 223           | 29             | 2388         |
| 237928       | Phospho1    | 9          | 17           | 33            | 40          | 11          | 17            | 29             | 51           |
| 237940       | Aoc2        | 42         | 106          | 102           | 989         | 27          | 48            | 59             | 419          |
| 237958       | 333407p14r  | 8          | 7            | 44            | 54          | 8           | 8             | 35             | 67           |
| 237979       | Sdk2        | 9          | 115          | 38            | 78          | 8           | 108           | 36             | 100          |
| 237987       | Otop2       | 22         | 8            | 23            | 45          | 19          | 10            | 24             | 43           |
| 238021       | Fscn2       | 16         | 2            | 25            | 47          | 14          | 3             | 27             | 46           |
| 238055       | Apob        | 7          | 12           | 36            | 19          | 7           | 17            | 29             | 26           |
| 238057       | Gdf7        | 25         | 20           | 30            | 39          | 24          | 15            | 28             | 42           |
| 238076       | Kcns3       | 30         | 2            | 25            | 18          | 24          | 3             | 20             | 25           |
| 238130       | Dock4       | 8          | 27           | 38            | 154         | 6           | 9             | 36             | 68           |
| 238205       | Lrfr5       | 7          | 7            | 24            | 31          | 9           | 7             | 24             | 29           |
| 238247       | Arid4a      | 225        | 727          | 101           | 4025        | 149         | 415           | 72             | 3307         |
| 238252       | Gpr135      | 10         | 2            | 25            | 25          | 11          | 3             | 28             | 30           |
| 238257       | Tmem30b     | 6          | 10           | 26            | 71          | 6           | 10            | 29             | 47           |
| 238323       | Rps6kl1     | 26         | 14           | 31            | 57          | 24          | 16            | 29             | 36           |
| 238377       | Gpr68       | 23         | 14           | 110           | 31          | 9           | 3             | 18             | 22           |
| 238384       | Slc24a4     | 6          | 18           | 30            | 36          | 7           | 19            | 26             | 23           |
| 238386       | Btbd7       | 84         | 81           | 22            | 642         | 82          | 57            | 22             | 658          |
| 238393       | Serpina3g   | 8          | 40           | 97            | 166         | 24          | 1795          | 1958           | 3130         |
| 238405       | 330523c11r  | 8          | 39           | 32            | 1426        | 8           | 32            | 34             | 1549         |
| 238406       | Adam6       | 6          | 2            | 19            | 38          | 5           | 3             | 23             | 25           |
| 238505       | Mtr         | 134        | 117          | 277           | 563         | 136         | 96            | 259            | 411          |
| 238663       | 332411g14r  | 5          | 7            | 22            | 62          | 5           | 9             | 21             | 76           |
| 238673       | Zfp367      | 48         | 70           | 66            | 79          | 71          | 204           | 147            | 115          |



| NCBI Gene ID | Gene Symbol | Affy. CD4+ | Agilent CD4+ | Illumina CD4+ | Nimbl. CD4+ | Affy. CD19+ | Agilent CD19+ | Illumina CD19+ | Nimbl. CD19+ |
|--------------|-------------|------------|--------------|---------------|-------------|-------------|---------------|----------------|--------------|
| 238725       | Gpr150      | 7          | 7            | 25            | 45          | 7           | 10            | 25             | 63           |
| 238799       | Tnpo1       | 205        | 1158         | 282           | 329         | 238         | 969           | 404            | 274          |
| 238871       | Pde4d       | 74         | 120          | 167           | 458         | 28          | 13            | 32             | 37           |
| 239027       | Arhgap22    | 13         | 13           | 25            | 69          | 13          | 14            | 19             | 81           |
| 239096       | Cdh24       | 52         | 10           | 23            | 52          | 25          | 9             | 23             | 50           |
| 239099       | Homez       | 20         | 114          | 130           | 64          | 20          | 159           | 137            | 132          |
| 239114       | Il17d       | 9          | 9            | 21            | 24          | 9           | 7             | 19             | 35           |
| 239134       | Gucy1b2     | 6          | 28           | 29            | 31          | 6           | 24            | 27             | 56           |
| 239157       | Pnma2       | 5          | 6            | 25            | 22          | 5           | 5             | 25             | 25           |
| 239167       | 330020e02r  | 7          | 3            | 24            | 55          | 8           | 3             | 20             | 62           |
| 239217       | Kctd12      | 40         | 13           | 39            | 94          | 168         | 393           | 481            | 622          |
| 239250       | Slitrk6     | 4          | 4            | 35            | 18          | 4           | 8             | 36             | 25           |
| 239273       | Abcc4       | 88         | 134          | 222           | 825         | 73          | 91            | 168            | 714          |
| 239318       | Plcx3       | 5          | 3            | 111           | 23          | 5           | 3             | 94             | 24           |
| 239337       | Adamts12    | 6          | 17           | 25            | 192         | 6           | 20            | 23             | 220          |
| 239364       | Tspyl5      | 11         | 15           | 30            | 16          | 11          | 9             | 27             | 16           |
| 239393       | Lrp12       | 20         | 117          | 78            | 94          | 12          | 8             | 33             | 24           |
| 239410       | 30017m01    | 5          | 3            | 22            | 23          | 5           | 3             | 32             | 26           |
| 239420       | Csmd3       | 6          | 20           | 28            | 30          | 6           | 30            | 33             | 26           |
| 239435       | Aard        | 5          | 7            | 23            | 17          | 6           | 5             | 24             | 24           |
| 239436       | Slc30a8     | 7          | 14           | 22            | 24          | 7           | 5             | 25             | 25           |
| 239528       | Eif2c2      | 392        | 348          | 356           | 99          | 299         | 161           | 282            | 655          |
| 239530       | Gpr20       | 20         | 4            | 20            | 30          | 16          | 5             | 24             | 41           |
| 239546       | Zfp647      | 13         | 30           | 32            | 100         | 14          | 28            | 28             | 139          |
| 239552       | Apol2       | 47         | 13           | 24            | 50          | 21          | 11            | 21             | 54           |
| 239611       | Muc19       | 6          | 3            | 31            | 19          | 5           | 3             | 32             | 18           |
| 239650       | Ai836003    | 9          | 2            | 24            | 55          | 9           | 3             | 24             | 59           |
| 239719       | Mkl2        | 46         | 7            | 19            | 24          | 51          | 10            | 18             | 26           |
| 239739       | Lamp3       | 4          | 86           | 26            | 3865        | 5           | 80            | 26             | 4081         |
| 239743       | Klhl6       | 504        | 600          | 4579          | 7968        | 409         | 496           | 3817           | 6201         |
| 239759       | Liph        | 5          | 6            | 28            | 32          | 5           | 7             | 29             | 37           |
| 239790       | Ostn        | 5          | 2            | 30            | 25          | 5           | 3             | 29             | 30           |
| 239796       | 500021p15r  | 12         | 7            | 33            | 40          | 11          | 6             | 29             | 52           |
| 239833       | Lmln        | 11         | 3            | 24            | 44          | 10          | 3             | 27             | 34           |
| 239845       | Gpr156      | 8          | 17           | 30            | 27          | 11          | 17            | 30             | 47           |
| 239853       | Gpr128      | 6          | 10           | 30            | 33          | 5           | 4             | 30             | 41           |
| 239931       | Cldn17      | 5          | 5            | 22            | 26          | 5           | 6             | 24             | 28           |
| 240025       | Dact2       | 14         | 6            | 36            | 48          | 14          | 4             | 31             | 43           |
| 240028       | Lnpep       | 563        | 269          | 31            | 418         | 432         | 153           | 34             | 316          |
| 240041       | 530033e08r  | 23         | 211          | 23            | 437         | 24          | 168           | 18             | 367          |
| 240047       | Mmp25       | 7          | 3            | 24            | 25          | 7           | 3             | 25             | 30           |
| 240058       | Cpne5       | 7          | 130          | 37            | 19          | 8           | 286           | 35             | 25           |
| 240064       | 030490i01r  | 24         | 22           | 19            | 184         | 17          | 13            | 21             | 105          |
| 240119       | St6gal2     | 7          | 19           | 23            | 27          | 7           | 16            | 23             | 26           |
| 240120       | Bc031441    | 6          | 159          | 19            | 1293        | 6           | 159           | 22             | 1283         |
| 240121       | Fsd1        | 13         | 6            | 27            | 30          | 12          | 6             | 23             | 24           |
| 240168       | Rasgrp3     | 7          | 3            | 20            | 46          | 442         | 1467          | 2513           | 6356         |
| 240174       | Thada       | 203        | 39           | 21            | 460         | 159         | 11            | 18             | 232          |
| 240215       | Slc4a9      | 12         | 133          | 19            | 103         | 10          | 129           | 21             | 58           |
| 240239       | Gpr151      | 8          | 3            | 25            | 19          | 8           | 3             | 30             | 19           |
| 240263       | Fem1c       | 190        | 306          | 392           | 1491        | 187         | 205           | 351            | 1052         |

| NCBI Gene ID | Gene Symbol | Affy. CD4+ | Agilent CD4+ | Illumina CD4+ | Nimbl. CD4+ | Affy. CD19+ | Agilent CD19+ | Illumina CD19+ | Nimbl. CD19+ |
|--------------|-------------|------------|--------------|---------------|-------------|-------------|---------------|----------------|--------------|
| 240322       | Adamts19    | 7          | 2            | 26            | 18          | 7           | 3             | 27             | 43           |
| 240332       | Slc6a7      | 9          | 11           | 32            | 19          | 10          | 14            | 23             | 21           |
| 240354       | Malt1       | 228        | 538          | 404           | 3433        | 458         | 1152          | 781            | 4786         |
| 240427       | Setbp1      | 12         | 53           | 20            | 39          | 75          | 47            | 21             | 491          |
| 240590       | Dmrt3       | 12         | 6            | 25            | 14          | 10          | 11            | 25             | 21           |
| 240595       | Kcnv2       | 10         | 2            | 24            | 19          | 10          | 3             | 22             | 21           |
| 240614       | Ranbp6      | 59         | 13           | 28            | 77          | 59          | 7             | 30             | 76           |
| 240641       | Mphosph1    | 14         | 33           | 96            | 906         | 20          | 62            | 147            | 1392         |
| 240660       | Tmem20      | 73         | 231          | 207           | 1634        | 23          | 21            | 30             | 62           |
| 240665       | Ccnj        | 31         | 18           | 23            | 67          | 79          | 53            | 24             | 178          |
| 240690       | St18        | 7          | 8            | 22            | 26          | 7           | 6             | 24             | 38           |
| 240725       | Sulf1       | 6          | 5            | 54            | 21          | 6           | 5             | 56             | 22           |
| 240726       | Slco5a1     | 6          | 3            | 30            | 22          | 7           | 3             | 30             | 33           |
| 240753       | Plekha6     | 8          | 8            | 24            | 63          | 8           | 6             | 26             | 51           |
| 240756       | Klhl12      | 26         | 58           | 45            | 428         | 26          | 67            | 52             | 421          |
| 240817       | 830403l16r  | 7          | 2            | 32            | 45          | 6           | 5             | 30             | 20           |
| 240843       | 130517e21r  | 8          | 39           | 24            | 30          | 8           | 39            | 24             | 38           |
| 240869       | Zbtb37      | 70         | 28           | 26            | 35          | 74          | 34            | 19             | 31           |
| 240873       | Tnfsf18     | 6          | 2            | 32            | 40          | 6           | 8             | 32             | 182          |
| 240913       | Adamts4     | 9          | 3            | 26            | 32          | 9           | 3             | 24             | 38           |
| 241035       | Pkhd1       | 5          | 2            | 50            | 14          | 6           | 5             | 50             | 14           |
| 241066       | Carf        | 17         | 5            | 26            | 174         | 14          | 3             | 29             | 174          |
| 241070       | Gpr1        | 6          | 17           | 23            | 30          | 7           | 14            | 27             | 27           |
| 241075       | 130067k14r  | 23         | 39           | 25            | 174         | 160         | 164           | 67             | 1175         |
| 241113       | Prkag3      | 15         | 4            | 26            | 41          | 12          | 3             | 25             | 40           |
| 241118       | Accn4       | 16         | 5            | 36            | 93          | 16          | 3             | 40             | 67           |
| 241159       | Neu4        | 15         | 6            | 37            | 45          | 14          | 6             | 35             | 44           |
| 241196       | Serpinb13   | 5          | 2            | 39            | 36          | 5           | 3             | 41             | 28           |
| 241197       | Serpinb10   | 4          | 6            | 25            | 22          | 4           | 6             | 24             | 124          |
| 241201       | Cdh7        | 6          | 6            | 42            | 18          | 5           | 7             | 40             | 46           |
| 241226       | Itga8       | 7          | 5            | 27            | 34          | 7           | 5             | 27             | 41           |
| 241263       | Gpr158      | 5          | 20           | 59            | 42          | 4           | 36            | 50             | 44           |
| 241275       | Noxa1       | 10         | 11           | 24            | 99          | 10          | 7             | 23             | 174          |
| 241308       | Ralgps1     | 44         | 15           | 184           | 115         | 45          | 16            | 208            | 105          |
| 241327       | Olfml2a     | 6          | 2            | 31            | 26          | 7           | 3             | 24             | 24           |
| 241391       | Galnt5      | 6          | 141          | 25            | 55          | 5           | 137           | 22             | 30           |
| 241447       | Lass6       | 80         | 903          | 32            | 205         | 23          | 148           | 34             | 46           |
| 241452       | Dhrs9       | 7          | 2            | 28            | 20          | 7           | 3             | 28             | 19           |
| 241489       | Pde11a      | 27         | 12           | 30            | 182         | 10          | 9             | 22             | 71           |
| 241494       | Zfp533      | 6          | 17           | 48            | 30          | 5           | 11            | 43             | 28           |
| 241516       | Fsip2       | 5          | 2            | 30            | 14          | 4           | 3             | 32             | 18           |
| 241547       | 130010m03   | 12         | 56           | 159           | 268         | 12          | 56            | 150            | 231          |
| 241612       | Slc5a12     | 5          | 2            | 18            | 28          | 5           | 3             | 21             | 32           |
| 241624       | Exdl1       | 6          | 3            | 52            | 30          | 6           | 3             | 47             | 24           |
| 241633       | Atp8b4      | 78         | 18           | 83            | 2011        | 7           | 3             | 31             | 48           |
| 241636       | Tgm6        | 7          | 9            | 31            | 38          | 7           | 15            | 28             | 27           |
| 241638       | Prosapip1   | 15         | 38           | 52            | 78          | 15          | 51            | 49             | 118          |
| 241639       | 130467p10r  | 5          | 4            | 25            | 34          | 5           | 8             | 29             | 42           |
| 241656       | Pak7        | 6          | 2            | 19            | 43          | 5           | 3             | 22             | 59           |
| 241727       | Snph        | 23         | 10           | 51            | 39          | 20          | 10            | 44             | 37           |
| 241764       | L3mbtl      | 16         | 4            | 30            | 109         | 16          | 4             | 33             | 75           |

| NCBI Gene ID | Gene Symbol | Affy. CD4+ | Agilent CD4+ | Illumina CD4+ | Nimbl. CD4+ | Affy. CD19+ | Agilent CD19+ | Illumina CD19+ | Nimbl. CD19+ |
|--------------|-------------|------------|--------------|---------------|-------------|-------------|---------------|----------------|--------------|
| 241770       | Rims4       | 24         | 9            | 28            | 29          | 23          | 7             | 27             | 44           |
| 241915       | Phc3        | 182        | 3            | 24            | 106         | 126         | 3             | 27             | 63           |
| 242083       | Ppm1l       | 36         | 82           | 123           | 233         | 57          | 152           | 177            | 544          |
| 242100       | Pglyrp3     | 6          | 3            | 21            | 16          | 6           | 3             | 21             | 17           |
| 242202       | Pde5a       | 7          | 2            | 32            | 53          | 8           | 3             | 33             | 68           |
| 242248       | Bank1       | 7          | 7            | 20            | 141         | 1049        | 1985          | 1170           | 15281        |
| 242316       | Gdf6        | 5          | 2            | 26            | 24          | 6           | 3             | 25             | 28           |
| 242341       | Atp6v0d2    | 4          | 2            | 23            | 50          | 4           | 3             | 25             | 35           |
| 242362       | Manea       | 35         | 27           | 153           | 2352        | 88          | 47            | 324            | 4911         |
| 242406       | L10029e03r  | 100        | 1243         | 321           | 704         | 95          | 1278          | 250            | 915          |
| 242409       | 30500o05r   | 16         | 3            | 22            | 80          | 13          | 4             | 21             | 128          |
| 242466       | Zfp462      | 9          | 3            | 32            | 27          | 9           | 3             | 28             | 21           |
| 242481       | Palm2       | 6          | 6            | 29            | 28          | 6           | 10            | 32             | 22           |
| 242506       | Frmd3       | 4          | 5            | 26            | 44          | 4           | 5             | 20             | 18           |
| 242509       | Bnc2        | 6          | 6            | 25            | 104         | 6           | 4             | 26             | 107          |
| 242519       | Ifna12      | 6          | 17           | 31            | 33          | 6           | 13            | 30             | 28           |
| 242523       | Dmrta1      | 5          | 2            | 28            | 31          | 6           | 3             | 27             | 28           |
| 242585       | Slc35d1     | 48         | 76           | 394           | 952         | 21          | 32            | 205            | 407          |
| 242594       | 700024p16r  | 5          | 4            | 20            | 21          | 5           | 4             | 20             | 41           |
| 242607       | Slc1a7      | 9          | 5            | 27            | 29          | 8           | 5             | 29             | 19           |
| 242608       | Podn        | 13         | 6            | 24            | 32          | 13          | 4             | 26             | 68           |
| 242620       | Dmrta2      | 21         | 2            | 37            | 96          | 19          | 3             | 30             | 85           |
| 242653       | Cldn19      | 21         | 25           | 41            | 54          | 20          | 19            | 37             | 38           |
| 242662       | Rims3       | 31         | 27           | 75            | 62          | 27          | 6             | 30             | 81           |
| 242667       | Dlgap3      | 22         | 24           | 25            | 66          | 22          | 29            | 22             | 92           |
| 242687       | Wasf2       | 254        | 4555         | 1772          | 32          | 274         | 4139          | 2041           | 45           |
| 242700       | Il28ra      | 10         | 4            | 26            | 19          | 12          | 30            | 74             | 128          |
| 242702       | Myom3       | 17         | 38           | 26            | 36          | 16          | 32            | 27             | 40           |
| 242705       | E2f2        | 26         | 501          | 251           | 1008        | 52          | 2121          | 691            | 1892         |
| 242726       | Padi6       | 6          | 12           | 28            | 81          | 6           | 10            | 32             | 82           |
| 242737       | Oog4        | 5          | 71           | 29            | 37          | 5           | 77            | 29             | 34           |
| 242773       | Slc45a1     | 11         | 36           | 32            | 50          | 11          | 47            | 32             | 51           |
| 242819       | Gm440       | 57         | 240          | 210           | 1051        | 15          | 31            | 46             | 226          |
| 242891       | Gm443       | 6          | 5            | 25            | 63          | 6           | 10            | 25             | 45           |
| 242939       | Cpz         | 8          | 6            | 23            | 125         | 8           | 9             | 17             | 100          |
| 242960       | Fbxl5       | 80         | 181          | 123           | 3630        | 129         | 274           | 181            | 4857         |
| 243043       | Kctd8       | 13         | 2            | 19            | 31          | 13          | 4             | 20             | 40           |
| 243078       | Srd5a2l2    | 4          | 3            | 23            | 17          | 4           | 3             | 26             | 18           |
| 243168       | Hsd17b13    | 7          | 6            | 28            | 21          | 7           | 3             | 30             | 28           |
| 243262       | Oas1f       | 7          | 114          | 29            | 51          | 6           | 185           | 25             | 70           |
| 243270       | Gpr81       | 8          | 2            | 21            | 26          | 6           | 4             | 20             | 21           |
| 243272       | Sbno1       | 213        | 897          | 28            | 7562        | 228         | 1205          | 26             | 5910         |
| 243277       | Gpr133      | 8          | 12           | 27            | 75          | 8           | 18            | 29             | 39           |
| 243300       | 130598a04r  | 11         | 45           | 24            | 104         | 10          | 10            | 20             | 77           |
| 243328       | Slc29a4     | 8          | 16           | 29            | 182         | 9           | 22            | 62             | 421          |
| 243362       | Stard13     | 5          | 2            | 26            | 35          | 5           | 5             | 20             | 42           |
| 243377       | Svs1        | 6          | 6            | 35            | 40          | 6           | 4             | 30             | 52           |
| 243499       | Lrrtm4      | 5          | 2            | 43            | 38          | 5           | 3             | 46             | 15           |
| 243510       | Mrpl53      | 46         | 1071         | 481           | 2676        | 50          | 1245          | 424            | 2440         |
| 243529       | H1fx        | 11         | 1613         | 21            | 78          | 11          | 1264          | 27             | 78           |
| 243548       | Prickle2    | 7          | 5            | 31            | 33          | 6           | 5             | 29             | 37           |

| NCBI Gene ID | Gene Symbol | Affy. CD4+ | Agilent CD4+ | Illumina CD4+ | Nimbl. CD4+ | Affy. CD19+ | Agilent CD19+ | Illumina CD19+ | Nimbl. CD19+ |
|--------------|-------------|------------|--------------|---------------|-------------|-------------|---------------|----------------|--------------|
| 243612       | 530042p16r  | 12         | 59           | 40            | 35          | 12          | 50            | 35             | 27           |
| 243621       | lqsec3      | 9          | 2            | 25            | 66          | 8           | 3             | 23             | 75           |
| 243634       | Tmem16b     | 6          | 3            | 31            | 30          | 6           | 3             | 33             | 31           |
| 243655       | Klre1       | 4          | 21           | 23            | 44          | 4           | 21            | 25             | 38           |
| 243725       | Ppp1r9a     | 5          | 11           | 25            | 31          | 6           | 13            | 27             | 36           |
| 243743       | Plxna4      | 9          | 13           | 32            | 23          | 9           | 23            | 32             | 38           |
| 243755       | Slc13a4     | 8          | 9            | 33            | 38          | 9           | 10            | 32             | 34           |
| 243764       | Chrm2       | 5          | 2            | 17            | 42          | 5           | 3             | 17             | 38           |
| 243780       | 330009j07r  | 6          | 394          | 319           | 157         | 4           | 149           | 151            | 72           |
| 243813       | Leng9       | 31         | 139          | 168           | 471         | 31          | 283           | 311            | 1025         |
| 243833       | Zfp128      | 16         | 2            | 60            | 133         | 14          | 3             | 66             | 144          |
| 243846       | Ccdc9       | 54         | 73           | 1018          | 121         | 60          | 98            | 1064           | 166          |
| 243853       | Fkrp        | 39         | 301          | 94            | 1958        | 38          | 303           | 90             | 1468         |
| 243864       | Mill2       | 10         | 7            | 22            | 32          | 11          | 5             | 21             | 84           |
| 243867       | Fbxo46      | 90         | 299          | 693           | 7934        | 67          | 359           | 649            | 10284        |
| 243897       | Ggn         | 21         | 39           | 36            | 79          | 18          | 45            | 36             | 60           |
| 243910       | Ay078069    | 94         | 379          | 1133          | 8397        | 177         | 657           | 1928           | 14181        |
| 243911       | Kirrel2     | 10         | 8            | 23            | 29          | 8           | 6             | 27             | 31           |
| 243914       | Lgi4        | 10         | 33           | 40            | 33          | 9           | 23            | 44             | 23           |
| 243923       | Rgs9bp      | 12         | 8            | 45            | 17          | 12          | 9             | 44             | 21           |
| 243937       | Zfp536      | 5          | 23           | 33            | 28          | 5           | 20            | 26             | 29           |
| 243979       | Mrgprb2     | 4          | 6            | 29            | 16          | 4           | 11            | 29             | 17           |
| 243983       | Zdhhc13     | 66         | 220          | 500           | 4964        | 116         | 332           | 774            | 5130         |
| 243996       | 333405o20r  | 6          | 2            | 25            | 37          | 6           | 3             | 21             | 52           |
| 244058       | Rgma        | 22         | 3            | 30            | 55          | 21          | 4             | 25             | 88           |
| 244187       | Olf684      | 6          | 45           | 23            | 21          | 5           | 57            | 26             | 16           |
| 244198       | Olfml1      | 5          | 3            | 24            | 35          | 5           | 3             | 28             | 35           |
| 244209       | Cyp2r1      | 10         | 10           | 27            | 112         | 21          | 17            | 26             | 239          |
| 244218       | Ctf2        | 8          | 16           | 21            | 23          | 8           | 17            | 23             | 21           |
| 244237       | Tnfrsf26    | 87         | 188          | 388           | 2281        | 35          | 62            | 151            | 813          |
| 244238       | Mrgpre      | 10         | 26           | 41            | 31          | 16          | 114           | 70             | 368          |
| 244310       | Dlgap2      | 8          | 130          | 36            | 55          | 7           | 112           | 37             | 55           |
| 244329       | Mcp1        | 57         | 20           | 74            | 210         | 39          | 12            | 80             | 127          |
| 244332       | Defb14      | 5          | 2            | 36            | 36          | 5           | 3             | 37             | 30           |
| 244334       | Defb8       | 5          | 3            | 26            | 18          | 5           | 3             | 22             | 21           |
| 244349       | Myst3       | 342        | 43           | 37            | 1226        | 344         | 35            | 44             | 1100         |
| 244416       | Ppp1r3b     | 23         | 13           | 98            | 397         | 17          | 4             | 36             | 31           |
| 244431       | Sgcz        | 7          | 46           | 23            | 25          | 6           | 35            | 21             | 27           |
| 244484       | Wdr17       | 5          | 2            | 36            | 26          | 5           | 3             | 28             | 39           |
| 244486       | Adam29      | 4          | 2            | 24            | 26          | 4           | 4             | 24             | 25           |
| 244548       | Elmod2      | 36         | 166          | 40            | 1073        | 42          | 228           | 45             | 1131         |
| 244551       | Nanos3      | 10         | 21           | 28            | 83          | 10          | 18            | 25             | 108          |
| 244562       | Abcc12      | 11         | 3            | 17            | 21          | 10          | 4             | 25             | 38           |
| 244646       | Pkd1l3      | 12         | 7            | 27            | 61          | 11          | 8             | 30             | 52           |
| 244653       | Hydin       | 7          | 20           | 25            | 30          | 7           | 16            | 26             | 41           |
| 244667       | Disc1       | 11         | 103          | 35            | 42          | 10          | 93            | 35             | 43           |
| 244668       | Sipa1l2     | 40         | 99           | 89            | 121         | 53          | 110           | 106            | 133          |
| 244672       | Cwf19l2     | 46         | 116          | 228           | 516         | 50          | 134           | 316            | 567          |
| 244701       | Mtnr1b      | 9          | 72           | 21            | 27          | 8           | 49            | 22             | 22           |
| 244713       | Zfp75       | 50         | 120          | 274           | 5854        | 66          | 171           | 349            | 6256         |
| 244721       | 10010b09r   | 26         | 66           | 38            | 67          | 27          | 70            | 41             | 76           |

| NCBI Gene ID | Gene Symbol | Affy. CD4+ | Agilent CD4+ | Illumina CD4+ | Nimbl. CD4+ | Affy. CD19+ | Agilent CD19+ | Illumina CD19+ | Nimbl. CD19+ |
|--------------|-------------|------------|--------------|---------------|-------------|-------------|---------------|----------------|--------------|
| 244810       | Aw551984    | 5          | 4            | 27            | 23          | 5           | 6             | 26             | 52           |
| 244813       | Bsx         | 8          | 4            | 27            | 97          | 8           | 7             | 28             | 125          |
| 244867       | Arhgap20    | 9          | 38           | 48            | 286         | 6           | 23            | 33             | 22           |
| 244879       | Npat        | 52         | 138          | 57            | 91          | 50          | 85            | 51             | 75           |
| 244886       | Ai118078    | 6          | 81           | 40            | 242         | 6           | 59            | 34             | 308          |
| 244891       | Zfp291      | 122        | 294          | 104           | 1441        | 128         | 245           | 96             | 1660         |
| 244954       | Prss35      | 6          | 2            | 27            | 23          | 5           | 5             | 26             | 20           |
| 244962       | Snx14       | 95         | 513          | 239           | 4746        | 76          | 400           | 180            | 2586         |
| 245049       | Myrip       | 12         | 4            | 31            | 59          | 13          | 3             | 31             | 61           |
| 245195       | Retnlg      | 6          | 4            | 26            | 19          | 6           | 3             | 30             | 27           |
| 245269       | 130304f04r  | 9          | 44           | 27            | 153         | 8           | 36            | 23             | 103          |
| 245308       | Zdhhc19     | 6          | 12           | 29            | 31          | 7           | 13            | 34             | 23           |
| 245404       | Wdr40b      | 9          | 2            | 24            | 25          | 11          | 3             | 21             | 20           |
| 245446       | Slitrk4     | 5          | 2            | 28            | 28          | 6           | 3             | 27             | 32           |
| 245450       | Slitrk2     | 5          | 4            | 35            | 17          | 6           | 6             | 28             | 18           |
| 245468       | Pnma3       | 5          | 2            | 25            | 20          | 5           | 3             | 23             | 39           |
| 245527       | Eda2r       | 5          | 2            | 29            | 46          | 5           | 3             | 26             | 46           |
| 245537       | Nlgn3       | 23         | 54           | 42            | 33          | 18          | 36            | 27             | 36           |
| 245572       | Tbx22       | 5          | 5            | 23            | 21          | 5           | 6             | 26             | 18           |
| 245578       | Pcdh11x     | 5          | 2            | 30            | 20          | 5           | 3             | 32             | 28           |
| 245583       | Tgifx1      | 6          | 3            | 25            | 20          | 5           | 3             | 19             | 23           |
| 245616       | Kir3dl1     | 5          | 2            | 26            | 18          | 5           | 3             | 30             | 20           |
| 245631       | Mum1l1      | 4          | 2            | 21            | 17          | 4           | 3             | 23             | 21           |
| 245650       | Gucy2f      | 5          | 18           | 24            | 16          | 5           | 14            | 24             | 16           |
| 245671       | Klf8        | 7          | 14           | 31            | 42          | 7           | 16            | 31             | 43           |
| 245684       | Cnksr2      | 5          | 2            | 50            | 31          | 4           | 3             | 43             | 25           |
| 245688       | Rbbp7       | 195        | 1373         | 552           | 6279        | 193         | 1213          | 500            | 5028         |
| 245839       | Gzmn        | 4          | 2            | 64            | 23          | 4           | 3             | 58             | 21           |
| 245841       | Polr2h      | 54         | 197          | 224           | 630         | 42          | 128           | 214            | 534          |
| 245857       | Ssh3        | 34         | 20           | 47            | 45          | 34          | 30            | 78             | 48           |
| 245865       | Spag4       | 21         | 3            | 37            | 87          | 20          | 6             | 43             | 78           |
| 245880       | Wasf3       | 8          | 17           | 26            | 36          | 8           | 20            | 31             | 46           |
| 245886       | Ankrd27     | 78         | 499          | 47            | 755         | 62          | 399           | 45             | 401          |
| 245944       | Vps54       | 109        | 558          | 805           | 15910       | 106         | 440           | 761            | 9698         |
| 246048       | Chodl       | 5          | 20           | 24            | 33          | 5           | 19            | 27             | 34           |
| 246049       | Slc36a2     | 8          | 4            | 24            | 59          | 8           | 4             | 26             | 87           |
| 246079       | Defb9       | 4          | 3            | 24            | 131         | 4           | 3             | 24             | 107          |
| 246080       | Defb7       | 5          | 2            | 60            | 32          | 4           | 8             | 62             | 38           |
| 246081       | Defb11      | 4          | 23           | 22            | 26          | 4           | 28            | 24             | 17           |
| 246082       | Defb15      | 6          | 6            | 29            | 36          | 7           | 11            | 29             | 45           |
| 246083       | Defb13      | 6          | 6            | 18            | 21          | 7           | 9             | 18             | 20           |
| 246084       | Defb35      | 7          | 4            | 36            | 39          | 5           | 3             | 37             | 41           |
| 246085       | Defb10      | 4          | 4            | 25            | 15          | 4           | 3             | 25             | 23           |
| 246086       | Onecut3     | 21         | 9            | 24            | 29          | 20          | 13            | 28             | 46           |
| 246102       | Rtnn        | 29         | 85           | 145           | 412         | 36          | 92            | 184            | 472          |
| 246133       | Kcne2       | 7          | 4            | 42            | 42          | 7           | 3             | 41             | 28           |
| 246177       | Myo1g       | 203        | 7030         | 3032          | 2459        | 287         | 11782         | 3899           | 3652         |
| 246179       | Fcmd        | 11         | 26           | 102           | 352         | 10          | 17            | 85             | 261          |
| 246190       | Otoa        | 6          | 10           | 25            | 39          | 6           | 13            | 29             | 39           |
| 246196       | Zfp277      | 52         | 449          | 244           | 784         | 48          | 351           | 210            | 684          |
| 246198       | Mllt6       | 221        | 96           | 32            | 97          | 159         | 70            | 32             | 114          |

| NCBI Gene ID | Gene Symbol | Affy. CD4+ | Agilent CD4+ | Illumina CD4+ | Nimbl. CD4+ | Affy. CD19+ | Agilent CD19+ | Illumina CD19+ | Nimbl. CD19+ |
|--------------|-------------|------------|--------------|---------------|-------------|-------------|---------------|----------------|--------------|
| 246221       | Mpst        | 21         | 50           | 35            | 138         | 20          | 51            | 30             | 144          |
| 246229       | Bivm        | 12         | 23           | 19            | 26          | 9           | 19            | 19             | 31           |
| 246277       | Csad        | 29         | 313          | 234           | 1472        | 34          | 206           | 288            | 1490         |
| 246278       | Cd207       | 8          | 4            | 24            | 32          | 7           | 5             | 23             | 29           |
| 246293       | Klhl8       | 16         | 169          | 28            | 341         | 12          | 95            | 26             | 162          |
| 246316       | Lgi2        | 7          | 10           | 32            | 57          | 7           | 6             | 31             | 92           |
| 246317       | Neto1       | 6          | 6            | 25            | 51          | 5           | 8             | 29             | 48           |
| 246691       | Prok1       | 8          | 42           | 25            | 31          | 7           | 54            | 24             | 33           |
| 246694       | Hps5        | 37         | 89           | 223           | 513         | 43          | 94            | 244            | 547          |
| 246696       | Slc25a28    | 55         | 584          | 1001          | 798         | 87          | 994           | 1772           | 1540         |
| 246700       | Defb19      | 6          | 19           | 25            | 23          | 7           | 15            | 27             | 24           |
| 246703       | Apoa1bp     | 71         | 516          | 184           | 10447       | 79          | 676           | 233            | 10560        |
| 246707       | Emilin2     | 12         | 17           | 34            | 47          | 14          | 16            | 26             | 49           |
| 246709       | Rgs13       | 4          | 3            | 22            | 41          | 8           | 31            | 23             | 271          |
| 246710       | Rhobtb2     | 80         | 649          | 226           | 1830        | 99          | 865           | 249            | 1636         |
| 246727       | Oas3        | 23         | 43           | 24            | 85          | 11          | 21            | 21             | 24           |
| 246728       | Oas2        | 45         | 304          | 219           | 185         | 28          | 122           | 99             | 85           |
| 246729       | Oas1h       | 5          | 2            | 21            | 20          | 5           | 3             | 22             | 26           |
| 246730       | Oas1a       | 10         | 71           | 20            | 66          | 20          | 147           | 19             | 106          |
| 246738       | Orf28       | 8          | 37           | 71            | 41          | 8           | 35            | 71             | 42           |
| 246747       | Bc054059    | 8          | 5            | 26            | 24          | 7           | 8             | 26             | 32           |
| 246779       | Il27        | 29         | 148          | 25            | 104         | 29          | 128           | 26             | 78           |
| 246782       | Atpaf2      | 49         | 423          | 236           | 2229        | 57          | 459           | 194            | 2234         |
| 246787       | Slc5a2      | 11         | 7            | 23            | 29          | 12          | 7             | 25             | 20           |
| 246788       | Trpv3       | 6          | 7            | 24            | 17          | 6           | 6             | 22             | 17           |
| 246791       | Obox3       | 6          | 22           | 22            | 32          | 7           | 21            | 25             | 32           |
| 246792       | Obox2       | 4          | 2            | 30            | 33          | 4           | 3             | 37             | 40           |
| 252829       | Obox5       | 9          | 2            | 26            | 21          | 7           | 3             | 27             | 26           |
| 252830       | Obox6       | 5          | 2            | 32            | 25          | 4           | 3             | 29             | 19           |
| 252837       | Ccr11       | 9          | 15           | 25            | 40          | 9           | 19            | 32             | 33           |
| 252838       | Tox         | 84         | 182          | 722           | 1960        | 14          | 3             | 26             | 119          |
| 252864       | Dusp15      | 5          | 15           | 37            | 36          | 5           | 18            | 36             | 38           |
| 252868       | Odf4        | 7          | 48           | 37            | 60          | 7           | 64            | 39             | 56           |
| 252870       | Usp7        | 401        | 2782         | 931           | 370         | 336         | 2574          | 931            | 191          |
| 252903       | Ap1s3       | 46         | 65           | 29            | 106         | 112         | 243           | 28             | 194          |
| 252904       | V1re9       | 4          | 4            | 26            | 17          | 4           | 3             | 24             | 39           |
| 252905       | V1rg1       | 4          | 4            | 27            | 45          | 4           | 4             | 27             | 22           |
| 252906       | V1rh2       | 6          | 2            | 27            | 66          | 6           | 3             | 31             | 94           |
| 252907       | V1ri1       | 5          | 62           | 24            | 16          | 5           | 62            | 25             | 18           |
| 252908       | V1ri8       | 12         | 10           | 30            | 14          | 12          | 9             | 29             | 17           |
| 252909       | V1rj3       | 5          | 7            | 27            | 17          | 5           | 19            | 30             | 18           |
| 252910       | V1re13      | 4          | 2            | 22            | 17          | 4           | 3             | 17             | 26           |
| 252912       | V1rh17      | 4          | 5            | 20            | 21          | 3           | 6             | 20             | 29           |
| 252966       | Cables2     | 17         | 300          | 219           | 460         | 39          | 643           | 555            | 1191         |
| 252967       | Ropn1l      | 8          | 7            | 34            | 126         | 7           | 3             | 31             | 96           |
| 252972       | Tpcn1       | 109        | 1311         | 1306          | 399         | 34          | 414           | 407            | 273          |
| 252974       | 330046g03r  | 8          | 13           | 24            | 59          | 8           | 10            | 28             | 86           |
| 257630       | Il17f       | 13         | 25           | 24            | 79          | 12          | 24            | 26             | 75           |
| 257633       | Bc021611    | 17         | 186          | 66            | 229         | 28          | 462           | 100            | 398          |
| 257635       | Sdsl        | 12         | 2            | 23            | 79          | 12          | 3             | 24             | 81           |
| 257667       | Olfir769    | 4          | 3            | 22            | 29          | 5           | 3             | 26             | 28           |

| NCBI<br>Gene ID | Gene<br>Symbol | Affy.<br>CD4+ | Agilent<br>CD4+ | Illumina<br>CD4+ | Nimbl.<br>CD4+ | Affy.<br>CD19+ | Agilent<br>CD19+ | Illumina<br>CD19+ | Nimbl.<br>CD19+ |
|-----------------|----------------|---------------|-----------------|------------------|----------------|----------------|------------------|-------------------|-----------------|
| 257734          | Olfr1355       | 4             | 10              | 39               | 15             | 4              | 6                | 35                | 19              |
| 257872          | Olfr835        | 5             | 12              | 86               | 16             | 5              | 19               | 81                | 15              |
| 257884          | Olfr744        | 6             | 217             | 36               | 17             | 6              | 247              | 36                | 20              |
| 257886          | Olfr225        | 9             | 15              | 34               | 72             | 9              | 17               | 31                | 42              |
| 257890          | Olfr12         | 6             | 30              | 25               | 32             | 6              | 32               | 25                | 42              |
| 257898          | Olfr867        | 4             | 3               | 34               | 16             | 4              | 3                | 33                | 15              |
| 257915          | Olfr1016       | 5             | 2               | 49               | 26             | 5              | 3                | 47                | 18              |
| 257926          | Olfr545        | 10            | 3               | 29               | 22             | 10             | 4                | 31                | 23              |
| 257932          | Olfr332        | 9             | 30              | 38               | 54             | 8              | 34               | 35                | 36              |
| 257938          | Olfr1419       | 5             | 57              | 35               | 28             | 5              | 46               | 37                | 19              |
| 257948          | Olfr104        | 4             | 2               | 35               | 15             | 4              | 3                | 36                | 16              |
| 257951          | Olfr987        | 5             | 13              | 35               | 32             | 5              | 14               | 36                | 33              |
| 257956          | Olfr1307       | 6             | 49              | 37               | 22             | 5              | 48               | 38                | 21              |
| 257959          | Olfr144        | 6             | 24              | 16               | 19             | 6              | 30               | 17                | 21              |
| 257972          | Olfr193        | 3             | 3               | 46               | 24             | 4              | 5                | 48                | 25              |
| 257975          | Olfr598        | 7             | 30              | 51               | 22             | 11             | 21               | 59                | 22              |
| 257985          | Olfr782        | 4             | 7               | 33               | 19             | 5              | 9                | 32                | 19              |
| 258023          | Olfr1306       | 4             | 30              | 42               | 17             | 4              | 25               | 40                | 19              |
| 258025          | Olfr1211       | 4             | 27              | 37               | 19             | 4              | 29               | 35                | 21              |
| 258042          | Olfr487        | 5             | 20              | 38               | 35             | 5              | 19               | 39                | 32              |
| 258055          | Olfr524        | 21            | 39              | 37               | 142            | 22             | 46               | 37                | 92              |
| 258056          | Olfr533        | 8             | 4               | 33               | 20             | 8              | 5                | 31                | 21              |
| 258060          | Olfr1181       | 4             | 8               | 33               | 15             | 4              | 5                | 32                | 16              |
| 258075          | Olfr832        | 4             | 3               | 38               | 15             | 3              | 3                | 37                | 14              |
| 258086          | Olfr967        | 5             | 9               | 32               | 19             | 4              | 14               | 34                | 17              |
| 258089          | Olfr304        | 5             | 5               | 39               | 16             | 5              | 9                | 38                | 20              |
| 258094          | Olfr126        | 6             | 33              | 27               | 15             | 6              | 32               | 20                | 20              |
| 258097          | Olfr1500       | 5             | 17              | 48               | 27             | 5              | 19               | 49                | 32              |
| 258111          | Olfr1126       | 5             | 34              | 30               | 16             | 5              | 35               | 24                | 18              |
| 258120          | Olfr1463       | 6             | 2               | 44               | 21             | 5              | 4                | 45                | 22              |
| 258147          | Olfr675        | 4             | 22              | 56               | 26             | 5              | 34               | 50                | 26              |
| 258160          | Olfr685        | 6             | 6               | 37               | 26             | 6              | 4                | 34                | 28              |
| 258167          | Olfr1182       | 5             | 9               | 33               | 19             | 5              | 9                | 28                | 19              |
| 258177          | Olfr1222       | 7             | 32              | 79               | 16             | 7              | 21               | 67                | 18              |
| 258178          | Olfr180        | 6             | 11              | 36               | 18             | 5              | 12               | 36                | 16              |
| 258189          | Olfr624        | 4             | 9               | 37               | 16             | 6              | 10               | 36                | 16              |
| 258196          | Olfr309        | 6             | 11              | 42               | 17             | 7              | 12               | 43                | 17              |
| 258219          | Olfr94         | 7             | 13              | 40               | 84             | 6              | 13               | 39                | 66              |
| 258220          | Olfr1148       | 12            | 34              | 35               | 18             | 10             | 24               | 36                | 19              |
| 258231          | Olfr1471       | 4             | 6               | 26               | 33             | 4              | 10               | 25                | 24              |
| 258233          | Olfr741        | 5             | 80              | 17               | 43             | 5              | 56               | 20                | 46              |
| 258241          | Olfr1212       | 4             | 3               | 25               | 17             | 4              | 3                | 26                | 16              |
| 258242          | Olfr955        | 4             | 2               | 19               | 29             | 5              | 9                | 20                | 42              |
| 258245          | Olfr1036       | 4             | 47              | 28               | 19             | 4              | 35               | 32                | 22              |
| 258246          | Olfr594        | 5             | 4               | 22               | 15             | 5              | 9                | 14                | 18              |
| 258247          | Olfr645        | 7             | 11              | 21               | 20             | 6              | 8                | 22                | 16              |
| 258249          | Olfr845        | 6             | 10              | 23               | 20             | 5              | 9                | 24                | 23              |
| 258255          | Olfr1010       | 5             | 28              | 23               | 18             | 5              | 31               | 23                | 16              |
| 258257          | Olfr1313       | 5             | 8               | 21               | 15             | 5              | 4                | 22                | 18              |
| 258258          | Olfr1308       | 4             | 2               | 25               | 14             | 4              | 3                | 27                | 17              |
| 258259          | Olfr1338       | 6             | 4               | 22               | 21             | 5              | 6                | 27                | 22              |

| NCBI<br>Gene ID | Gene<br>Symbol | Affy.<br>CD4+ | Agilent<br>CD4+ | Illumina<br>CD4+ | Nimbl.<br>CD4+ | Affy.<br>CD19+ | Agilent<br>CD19+ | Illumina<br>CD19+ | Nimbl.<br>CD19+ |
|-----------------|----------------|---------------|-----------------|------------------|----------------|----------------|------------------|-------------------|-----------------|
| 258265          | Olfr1333       | 6             | 7               | 26               | 36             | 6              | 7                | 27                | 32              |
| 258266          | Olfr247        | 6             | 21              | 24               | 22             | 7              | 24               | 24                | 23              |
| 258267          | Olfr370        | 7             | 3               | 35               | 20             | 9              | 5                | 37                | 21              |
| 258269          | Olfr930        | 4             | 49              | 25               | 13             | 4              | 62               | 24                | 17              |
| 258270          | Olfr448        | 5             | 5               | 35               | 72             | 5              | 4                | 40                | 120             |
| 258271          | Olfr1311       | 4             | 3               | 23               | 26             | 5              | 3                | 30                | 26              |
| 258272          | Olfr1402       | 7             | 38              | 34               | 81             | 8              | 38               | 31                | 73              |
| 258273          | Olfr1394       | 22            | 39              | 59               | 67             | 18             | 46               | 49                | 91              |
| 258274          | Olfr1412       | 7             | 4               | 32               | 40             | 7              | 5                | 31                | 53              |
| 258275          | Olfr729        | 4             | 9               | 27               | 42             | 4              | 6                | 26                | 27              |
| 258276          | Olfr960        | 5             | 5               | 22               | 150            | 7              | 3                | 18                | 153             |
| 258277          | Olfr281        | 7             | 12              | 28               | 29             | 6              | 9                | 32                | 18              |
| 258278          | Olfr284        | 8             | 3               | 20               | 178            | 8              | 4                | 18                | 102             |
| 258279          | Olfr846        | 4             | 15              | 25               | 16             | 4              | 20               | 24                | 13              |
| 258280          | Olfr1366       | 5             | 17              | 33               | 40             | 5              | 23               | 30                | 36              |
| 258281          | Olfr780        | 5             | 47              | 25               | 20             | 4              | 46               | 29                | 20              |
| 258282          | Olfr801        | 5             | 14              | 20               | 22             | 5              | 16               | 18                | 20              |
| 258283          | Olfr981        | 8             | 2               | 24               | 24             | 9              | 4                | 26                | 20              |
| 258284          | Olfr114        | 4             | 30              | 29               | 23             | 4              | 36               | 24                | 16              |
| 258285          | Olfr122        | 6             | 6               | 29               | 25             | 5              | 15               | 45                | 25              |
| 258286          | Olfr113        | 7             | 15              | 21               | 44             | 6              | 17               | 23                | 24              |
| 258287          | Olfr125        | 4             | 9               | 28               | 20             | 4              | 6                | 31                | 25              |
| 258288          | Olfr1484       | 4             | 4               | 23               | 25             | 4              | 3                | 22                | 27              |
| 258289          | Olfr1324       | 5             | 2               | 26               | 25             | 5              | 3                | 25                | 29              |
| 258290          | Olfr1143       | 4             | 56              | 40               | 15             | 4              | 50               | 40                | 16              |
| 258291          | Olfr1167       | 4             | 3               | 21               | 18             | 4              | 3                | 19                | 17              |
| 258292          | Olfr446        | 7             | 20              | 23               | 31             | 7              | 23               | 24                | 26              |
| 258293          | Olfr437        | 5             | 8               | 28               | 51             | 6              | 16               | 29                | 34              |
| 258294          | Olfr1115       | 6             | 16              | 26               | 22             | 6              | 16               | 20                | 19              |
| 258295          | Olfr746        | 5             | 3               | 19               | 37             | 5              | 7                | 22                | 27              |
| 258296          | Olfr745        | 5             | 16              | 27               | 22             | 5              | 17               | 27                | 17              |
| 258297          | Olfr827        | 4             | 2               | 26               | 19             | 4              | 3                | 27                | 15              |
| 258300          | Olfr1449       | 5             | 2               | 28               | 17             | 4              | 3                | 46                | 15              |
| 258301          | Olfr1340       | 7             | 3               | 17               | 15             | 7              | 3                | 19                | 14              |
| 258302          | Olfr420        | 5             | 2               | 29               | 14             | 6              | 3                | 27                | 14              |
| 258303          | Olfr518        | 5             | 23              | 24               | 30             | 6              | 24               | 23                | 28              |
| 258304          | Olfr498        | 4             | 3               | 31               | 32             | 4              | 3                | 32                | 25              |
| 258305          | Olfr1356       | 5             | 8               | 21               | 37             | 5              | 11               | 20                | 45              |
| 258306          | Olfr1337       | 7             | 13              | 31               | 31             | 7              | 16               | 27                | 55              |
| 258307          | Olfr493        | 4             | 8               | 18               | 29             | 4              | 9                | 23                | 18              |
| 258308          | Olfr510        | 5             | 8               | 23               | 20             | 5              | 8                | 22                | 26              |
| 258309          | Olfr657        | 6             | 4               | 38               | 16             | 5              | 5                | 39                | 18              |
| 258311          | Olfr601        | 8             | 17              | 19               | 40             | 8              | 23               | 23                | 41              |
| 258314          | Olfr725        | 4             | 2               | 27               | 12             | 4              | 3                | 26                | 12              |
| 258317          | Olfr1145       | 5             | 3               | 39               | 21             | 5              | 4                | 36                | 20              |
| 258318          | Olfr186        | 4             | 4               | 25               | 15             | 4              | 4                | 25                | 19              |
| 258319          | Olfr187        | 4             | 29              | 29               | 16             | 4              | 21               | 27                | 17              |
| 258320          | Olfr1232       | 3             | 49              | 20               | 19             | 4              | 24               | 22                | 25              |
| 258321          | Olfr809        | 4             | 3               | 25               | 14             | 4              | 3                | 26                | 16              |
| 258322          | Olfr554        | 5             | 39              | 36               | 51             | 5              | 38               | 35                | 40              |
| 258323          | Olfr943        | 4             | 6               | 24               | 16             | 5              | 4                | 29                | 17              |



| NCBI<br>Gene ID | Gene<br>Symbol | Affy.<br>CD4+ | Agilent<br>CD4+ | Illumina<br>CD4+ | Nimbl.<br>CD4+ | Affy.<br>CD19+ | Agilent<br>CD19+ | Illumina<br>CD19+ | Nimbl.<br>CD19+ |
|-----------------|----------------|---------------|-----------------|------------------|----------------|----------------|------------------|-------------------|-----------------|
| 258324          | Olfr129        | 5             | 9               | 27               | 20             | 6              | 12               | 23                | 20              |
| 258325          | Olfr110        | 5             | 6               | 26               | 25             | 5              | 6                | 26                | 30              |
| 258326          | Olfr642        | 6             | 38              | 29               | 31             | 7              | 28               | 29                | 19              |
| 258327          | Olfr958        | 6             | 3               | 29               | 41             | 6              | 3                | 26                | 52              |
| 258328          | Olfr954        | 5             | 4               | 25               | 17             | 5              | 3                | 23                | 22              |
| 258329          | Olfr135        | 4             | 2               | 43               | 22             | 4              | 3                | 43                | 23              |
| 258331          | Olfr1330       | 5             | 2               | 35               | 176            | 5              | 3                | 33                | 169             |
| 258333          | Olfr893        | 4             | 2               | 26               | 15             | 4              | 3                | 28                | 14              |
| 258334          | Olfr1396       | 5             | 6               | 25               | 130            | 6              | 10               | 26                | 84              |
| 258335          | Olfr374        | 7             | 44              | 25               | 32             | 6              | 45               | 24                | 26              |
| 258336          | Olfr77         | 4             | 33              | 24               | 26             | 4              | 24               | 21                | 25              |
| 258339          | Olfr1269       | 4             | 44              | 33               | 47             | 4              | 42               | 34                | 53              |
| 258341          | Olfr1495       | 6             | 42              | 20               | 44             | 4              | 37               | 21                | 31              |
| 258342          | Olfr1491       | 8             | 17              | 24               | 47             | 7              | 15               | 24                | 33              |
| 258343          | Olfr397        | 4             | 12              | 24               | 17             | 4              | 13               | 31                | 21              |
| 258344          | Olfr390        | 4             | 4               | 20               | 57             | 5              | 4                | 20                | 64              |
| 258345          | Olfr1121       | 4             | 18              | 25               | 44             | 5              | 17               | 34                | 44              |
| 258346          | Olfr1128       | 5             | 4               | 19               | 13             | 5              | 4                | 23                | 15              |
| 258347          | Olfr1123       | 4             | 4               | 17               | 13             | 5              | 7                | 25                | 11              |
| 258348          | Olfr1133       | 5             | 3               | 31               | 30             | 4              | 4                | 31                | 44              |
| 258350          | Olfr706        | 5             | 11              | 25               | 19             | 4              | 14               | 29                | 16              |
| 258351          | Olfr633        | 7             | 3               | 30               | 30             | 6              | 3                | 29                | 43              |
| 258352          | Olfr692        | 7             | 4               | 23               | 44             | 7              | 3                | 23                | 21              |
| 258353          | Olfr521        | 6             | 39              | 19               | 23             | 7              | 39               | 22                | 24              |
| 258355          | Olfr677        | 4             | 6               | 20               | 14             | 5              | 4                | 23                | 36              |
| 258356          | Olfr564        | 5             | 3               | 21               | 27             | 5              | 3                | 20                | 26              |
| 258357          | Olfr574        | 4             | 4               | 33               | 17             | 5              | 3                | 24                | 20              |
| 258358          | Olfr557        | 5             | 22              | 23               | 23             | 5              | 18               | 26                | 28              |
| 258359          | Olfr1312       | 4             | 9               | 27               | 12             | 4              | 5                | 22                | 16              |
| 258360          | Olfr731        | 4             | 4               | 26               | 28             | 5              | 3                | 25                | 23              |
| 258361          | Olfr495        | 6             | 3               | 30               | 16             | 5              | 4                | 30                | 17              |
| 258362          | Olfr1094       | 4             | 2               | 30               | 18             | 4              | 3                | 30                | 15              |
| 258363          | Olfr1093       | 5             | 25              | 24               | 17             | 5              | 31               | 23                | 21              |
| 258364          | Olfr976        | 7             | 12              | 35               | 22             | 7              | 18               | 37                | 28              |
| 258365          | Olfr361        | 8             | 8               | 25               | 15             | 8              | 3                | 24                | 17              |
| 258366          | Olfr434        | 5             | 39              | 25               | 49             | 5              | 32               | 28                | 69              |
| 258368          | Olfr1450       | 4             | 3               | 24               | 16             | 4              | 3                | 25                | 13              |
| 258369          | Olfr509        | 4             | 11              | 23               | 67             | 4              | 14               | 22                | 77              |
| 258371          | Olfr368        | 10            | 47              | 21               | 74             | 10             | 37               | 22                | 83              |
| 258372          | Olfr918        | 4             | 13              | 35               | 28             | 4              | 14               | 30                | 55              |
| 258373          | Olfr323        | 5             | 2               | 26               | 41             | 5              | 4                | 28                | 29              |
| 258374          | Olfr127        | 4             | 60              | 24               | 19             | 3              | 28               | 28                | 15              |
| 258375          | Olfr794        | 4             | 4               | 27               | 22             | 4              | 3                | 28                | 26              |
| 258377          | Olfr654        | 4             | 9               | 26               | 14             | 4              | 4                | 24                | 18              |
| 258378          | Olfr593        | 5             | 3               | 26               | 20             | 6              | 3                | 27                | 22              |
| 258379          | Olfr1284       | 7             | 27              | 42               | 22             | 8              | 32               | 36                | 19              |
| 258380          | Olfr461        | 5             | 2               | 23               | 18             | 5              | 3                | 24                | 30              |
| 258381          | Olfr460        | 6             | 5               | 19               | 18             | 6              | 10               | 23                | 16              |
| 258383          | Olfr1347       | 17            | 2               | 26               | 16             | 18             | 3                | 32                | 20              |
| 258384          | Olfr1350       | 6             | 107             | 25               | 33             | 6              | 75               | 21                | 42              |
| 258385          | Olfr1323       | 5             | 2               | 19               | 17             | 6              | 3                | 23                | 13              |

| NCBI<br>Gene ID | Gene<br>Symbol | Affy.<br>CD4+ | Agilent<br>CD4+ | Illumina<br>CD4+ | Nimbl.<br>CD4+ | Affy.<br>CD19+ | Agilent<br>CD19+ | Illumina<br>CD19+ | Nimbl.<br>CD19+ |
|-----------------|----------------|---------------|-----------------|------------------|----------------|----------------|------------------|-------------------|-----------------|
| 258387          | Olfr720        | 6             | 2               | 32               | 40             | 6              | 4                | 25                | 44              |
| 258388          | Olfr1279       | 6             | 2               | 22               | 24             | 6              | 3                | 22                | 28              |
| 258389          | Olfr1278       | 5             | 2               | 26               | 28             | 6              | 3                | 28                | 60              |
| 258390          | Olfr1276       | 5             | 29              | 22               | 24             | 5              | 34               | 26                | 32              |
| 258391          | Olfr1277       | 4             | 3               | 25               | 17             | 5              | 3                | 17                | 13              |
| 258392          | Olfr190        | 4             | 27              | 17               | 19             | 3              | 20               | 25                | 20              |
| 258393          | Olfr1325       | 4             | 7               | 17               | 14             | 4              | 4                | 21                | 17              |
| 258395          | Olfr1288       | 4             | 7               | 20               | 18             | 4              | 7                | 22                | 14              |
| 258396          | Olfr1305       | 5             | 32              | 25               | 19             | 5              | 24               | 25                | 21              |
| 258397          | Olfr1303       | 4             | 24              | 17               | 14             | 4              | 20               | 20                | 16              |
| 258398          | Olfr1295       | 5             | 16              | 25               | 14             | 4              | 16               | 23                | 14              |
| 258399          | Olfr1289       | 5             | 3               | 26               | 138            | 5              | 5                | 22                | 89              |
| 258400          | Olfr228        | 4             | 9               | 28               | 16             | 4              | 8                | 22                | 20              |
| 258401          | Olfr1076       | 4             | 2               | 17               | 16             | 4              | 3                | 22                | 16              |
| 258402          | Olfr1079       | 4             | 2               | 24               | 15             | 4              | 3                | 25                | 16              |
| 258403          | Olfr1065       | 4             | 330             | 29               | 46             | 4              | 115              | 25                | 48              |
| 258404          | Olfr1080       | 4             | 2               | 22               | 25             | 3              | 3                | 22                | 19              |
| 258405          | Olfr1420       | 5             | 10              | 32               | 21             | 4              | 15               | 34                | 18              |
| 258406          | Olfr462        | 10            | 82              | 22               | 38             | 8              | 68               | 17                | 35              |
| 258407          | Olfr464        | 7             | 2               | 163              | 17             | 7              | 3                | 137               | 19              |
| 258409          | Olfr1431       | 4             | 10              | 24               | 22             | 4              | 13               | 24                | 32              |
| 258412          | Olfr877        | 5             | 6               | 27               | 25             | 5              | 3                | 25                | 24              |
| 258413          | Olfr881        | 5             | 3               | 26               | 17             | 6              | 3                | 25                | 14              |
| 258414          | Olfr883        | 5             | 21              | 19               | 19             | 5              | 17               | 23                | 33              |
| 258415          | Olfr887        | 4             | 3               | 35               | 24             | 5              | 3                | 45                | 24              |
| 258416          | Olfr888        | 5             | 3               | 19               | 34             | 5              | 5                | 19                | 36              |
| 258417          | Olfr470        | 5             | 6               | 27               | 15             | 4              | 8                | 24                | 17              |
| 258418          | Olfr469        | 5             | 32              | 20               | 16             | 5              | 33               | 21                | 15              |
| 258421          | Olfr223        | 5             | 29              | 25               | 49             | 5              | 34               | 20                | 77              |
| 258423          | Olfr1510       | 15            | 3               | 26               | 20             | 16             | 4                | 25                | 32              |
| 258424          | Olfr1512       | 5             | 3               | 25               | 43             | 5              | 3                | 29                | 35              |
| 258425          | Olfr994        | 4             | 3               | 21               | 13             | 4              | 3                | 23                | 15              |
| 258426          | Olfr995        | 4             | 2               | 25               | 15             | 4              | 3                | 32                | 16              |
| 258427          | Olfr993        | 4             | 2               | 34               | 18             | 4              | 3                | 32                | 16              |
| 258428          | Olfr998        | 5             | 3               | 22               | 34             | 5              | 4                | 22                | 24              |
| 258429          | Olfr996        | 4             | 13              | 34               | 26             | 4              | 19               | 38                | 33              |
| 258430          | Olfr938        | 5             | 9               | 21               | 16             | 4              | 9                | 25                | 15              |
| 258431          | Olfr937        | 4             | 9               | 20               | 21             | 4              | 10               | 22                | 38              |
| 258432          | Olfr919        | 5             | 11              | 34               | 15             | 6              | 8                | 30                | 19              |
| 258433          | Olfr933        | 6             | 38              | 20               | 41             | 6              | 52               | 20                | 19              |
| 258434          | Olfr934        | 4             | 2               | 22               | 15             | 5              | 3                | 19                | 16              |
| 258435          | Olfr382        | 5             | 22              | 29               | 22             | 6              | 27               | 27                | 24              |
| 258436          | Olfr458        | 12            | 10              | 26               | 38             | 12             | 9                | 31                | 53              |
| 258437          | Olfr450        | 6             | 25              | 30               | 14             | 6              | 19               | 29                | 15              |
| 258438          | Olfr215        | 8             | 3               | 26               | 28             | 8              | 3                | 22                | 25              |
| 258439          | Olfr1309       | 5             | 10              | 31               | 18             | 5              | 11               | 34                | 21              |
| 258440          | Olfr1317       | 5             | 20              | 22               | 44             | 4              | 21               | 23                | 18              |
| 258441          | Olfr1310       | 4             | 2               | 22               | 16             | 6              | 3                | 24                | 16              |
| 258442          | Olfr1314       | 4             | 4               | 19               | 15             | 4              | 3                | 21                | 17              |
| 258443          | Olfr164        | 4             | 5               | 21               | 14             | 6              | 4                | 23                | 28              |
| 258445          | Olfr693        | 5             | 42              | 24               | 21             | 5              | 37               | 25                | 34              |

| NCBI<br>Gene ID | Gene<br>Symbol | Affy.<br>CD4+ | Agilent<br>CD4+ | Illumina<br>CD4+ | Nimbl.<br>CD4+ | Affy.<br>CD19+ | Agilent<br>CD19+ | Illumina<br>CD19+ | Nimbl.<br>CD19+ |
|-----------------|----------------|---------------|-----------------|------------------|----------------|----------------|------------------|-------------------|-----------------|
| 258446          | Olfr1231       | 6             | 11              | 28               | 20             | 6              | 11               | 23                | 16              |
| 258447          | Olfr1241       | 4             | 2               | 20               | 35             | 5              | 3                | 22                | 42              |
| 258448          | Olfr92         | 7             | 7               | 22               | 91             | 7              | 4                | 26                | 91              |
| 258449          | Olfr282        | 12            | 74              | 24               | 132            | 14             | 65               | 25                | 121             |
| 258450          | Olfr1199       | 3             | 2               | 25               | 16             | 4              | 4                | 31                | 19              |
| 258451          | Olfr1215       | 5             | 40              | 26               | 19             | 5              | 32               | 25                | 15              |
| 258453          | Olfr1209       | 5             | 5               | 55               | 24             | 5              | 9                | 52                | 51              |
| 258454          | Olfr1202       | 4             | 2               | 22               | 13             | 5              | 2                | 28                | 17              |
| 258455          | Olfr1204       | 4             | 3               | 26               | 19             | 4              | 3                | 24                | 18              |
| 258457          | Olfr108        | 4             | 3               | 23               | 25             | 4              | 4                | 24                | 29              |
| 258458          | Olfr165        | 6             | 3               | 28               | 33             | 10             | 4                | 31                | 72              |
| 258459          | Olfr1388       | 7             | 23              | 19               | 49             | 6              | 16               | 24                | 37              |
| 258460          | Olfr1391       | 5             | 5               | 19               | 25             | 5              | 8                | 25                | 31              |
| 258463          | Olfr1393       | 8             | 31              | 36               | 44             | 11             | 27               | 35                | 63              |
| 258464          | Olfr1384       | 5             | 15              | 47               | 22             | 5              | 19               | 45                | 24              |
| 258465          | Olfr1387       | 5             | 28              | 24               | 21             | 4              | 25               | 25                | 20              |
| 258466          | Olfr1261       | 4             | 2               | 25               | 23             | 4              | 3                | 35                | 24              |
| 258468          | Olfr1254       | 4             | 2               | 26               | 20             | 4              | 4                | 27                | 19              |
| 258469          | Olfr90         | 6             | 14              | 28               | 36             | 7              | 20               | 25                | 52              |
| 258470          | Olfr91         | 14            | 2               | 28               | 39             | 16             | 3                | 28                | 37              |
| 258471          | Olfr891        | 4             | 5               | 30               | 25             | 5              | 5                | 28                | 36              |
| 258474          | Olfr890        | 4             | 33              | 20               | 19             | 4              | 32               | 24                | 15              |
| 258475          | Olfr889        | 4             | 4               | 35               | 18             | 4              | 3                | 30                | 20              |
| 258477          | Olfr197        | 5             | 8               | 30               | 13             | 4              | 10               | 32                | 16              |
| 258478          | Olfr183        | 4             | 11              | 24               | 16             | 4              | 12               | 24                | 17              |
| 258479          | Olfr203        | 4             | 15              | 24               | 28             | 4              | 15               | 22                | 33              |
| 258480          | Olfr130        | 5             | 7               | 21               | 19             | 5              | 4                | 22                | 25              |
| 258481          | Olfr137        | 5             | 14              | 22               | 23             | 5              | 19               | 20                | 18              |
| 258482          | Olfr266        | 5             | 23              | 21               | 20             | 6              | 20               | 23                | 16              |
| 258483          | Olfr1411       | 8             | 8               | 28               | 29             | 9              | 11               | 27                | 39              |
| 258484          | Olfr1410       | 15            | 60              | 22               | 225            | 15             | 54               | 25                | 371             |
| 258486          | Olfr730        | 4             | 2               | 26               | 19             | 5              | 3                | 23                | 20              |
| 258487          | Olfr722        | 4             | 9               | 24               | 22             | 3              | 10               | 25                | 19              |
| 258488          | Olfr474        | 4             | 2               | 18               | 20             | 4              | 3                | 24                | 19              |
| 258489          | Olfr486        | 4             | 18              | 25               | 36             | 4              | 24               | 28                | 75              |
| 258490          | Olfr492        | 4             | 2               | 22               | 18             | 4              | 3                | 22                | 23              |
| 258491          | Olfr490        | 3             | 3               | 23               | 18             | 4              | 3                | 21                | 18              |
| 258493          | Olfr319        | 6             | 48              | 33               | 21             | 7              | 62               | 34                | 44              |
| 258497          | Olfr961        | 4             | 18              | 33               | 25             | 4              | 15               | 33                | 29              |
| 258498          | Olfr148        | 6             | 2               | 30               | 19             | 6              | 9                | 26                | 18              |
| 258499          | Olfr945        | 4             | 15              | 16               | 17             | 4              | 17               | 22                | 30              |
| 258500          | Olfr944        | 5             | 26              | 20               | 21             | 4              | 22               | 23                | 27              |
| 258501          | Olfr959        | 7             | 8               | 21               | 14             | 7              | 11               | 23                | 20              |
| 258502          | Olfr234        | 7             | 334             | 38               | 37             | 7              | 332              | 36                | 19              |
| 258504          | Olfr107        | 4             | 13              | 25               | 14             | 4              | 11               | 29                | 21              |
| 258505          | Olfr97         | 7             | 4               | 35               | 31             | 11             | 6                | 37                | 62              |
| 258506          | Olfr95         | 9             | 17              | 25               | 24             | 8              | 18               | 23                | 21              |
| 258507          | Olfr96         | 7             | 3               | 22               | 17             | 8              | 3                | 21                | 18              |
| 258508          | Olfr99         | 8             | 2               | 43               | 120            | 15             | 3                | 44                | 128             |
| 258511          | Olfr523        | 12            | 20              | 28               | 22             | 12             | 18               | 29                | 17              |
| 258512          | Olfr530        | 6             | 25              | 16               | 19             | 7              | 15               | 20                | 13              |

| NCBI<br>Gene ID | Gene<br>Symbol | Affy.<br>CD4+ | Agilent<br>CD4+ | Illumina<br>CD4+ | Nimbl.<br>CD4+ | Affy.<br>CD19+ | Agilent<br>CD19+ | Illumina<br>CD19+ | Nimbl.<br>CD19+ |
|-----------------|----------------|---------------|-----------------|------------------|----------------|----------------|------------------|-------------------|-----------------|
| 258515          | Olfr854        | 4             | 3               | 20               | 12             | 4              | 3                | 18                | 13              |
| 258516          | Olfr850        | 5             | 9               | 25               | 23             | 5              | 10               | 22                | 17              |
| 258517          | Olfr855        | 4             | 8               | 25               | 15             | 4              | 10               | 29                | 17              |
| 258518          | Olfr847        | 4             | 18              | 21               | 23             | 4              | 25               | 24                | 15              |
| 258519          | Olfr859        | 4             | 10              | 30               | 32             | 4              | 12               | 31                | 42              |
| 258520          | Olfr849        | 4             | 31              | 29               | 14             | 4              | 32               | 32                | 13              |
| 258521          | Olfr860        | 4             | 11              | 28               | 15             | 4              | 10               | 30                | 13              |
| 258522          | Olfr1183       | 4             | 30              | 24               | 17             | 4              | 27               | 27                | 18              |
| 258524          | Olfr1168       | 4             | 2               | 33               | 18             | 4              | 3                | 38                | 25              |
| 258525          | Olfr1170       | 4             | 16              | 16               | 38             | 4              | 20               | 23                | 48              |
| 258526          | Olfr1367       | 4             | 4               | 25               | 15             | 5              | 6                | 24                | 19              |
| 258527          | Olfr1368       | 4             | 3               | 21               | 29             | 4              | 3                | 22                | 26              |
| 258528          | Olfr1370       | 5             | 2               | 17               | 19             | 6              | 3                | 19                | 21              |
| 258529          | Olfr313        | 6             | 34              | 33               | 15             | 6              | 45               | 33                | 17              |
| 258531          | Olfr315        | 11            | 12              | 27               | 30             | 12             | 8                | 32                | 38              |
| 258533          | Olfr1364       | 9             | 32              | 23               | 18             | 8              | 34               | 21                | 16              |
| 258534          | Olfr1361       | 7             | 5               | 25               | 58             | 6              | 5                | 21                | 35              |
| 258538          | Olfr1518       | 5             | 21              | 26               | 14             | 5              | 21               | 25                | 17              |
| 258540          | Olfr771        | 4             | 3               | 21               | 18             | 4              | 6                | 21                | 23              |
| 258541          | Olfr800        | 4             | 7               | 26               | 15             | 4              | 12               | 26                | 19              |
| 258542          | Olfr786        | 4             | 44              | 29               | 17             | 5              | 32               | 26                | 21              |
| 258543          | Olfr810        | 6             | 8               | 24               | 16             | 6              | 11               | 25                | 19              |
| 258544          | Olfr788        | 5             | 54              | 26               | 18             | 5              | 51               | 24                | 19              |
| 258545          | Olfr811        | 5             | 2               | 31               | 28             | 5              | 3                | 27                | 22              |
| 258546          | Olfr806        | 3             | 8               | 33               | 50             | 3              | 3                | 35                | 57              |
| 258547          | Olfr803        | 4             | 6               | 23               | 17             | 4              | 3                | 21                | 19              |
| 258548          | Olfr805        | 4             | 9               | 24               | 19             | 4              | 8                | 19                | 17              |
| 258549          | Olfr798        | 4             | 4               | 18               | 18             | 4              | 4                | 22                | 14              |
| 258550          | Olfr869        | 4             | 2               | 34               | 11             | 4              | 3                | 35                | 12              |
| 258551          | Olfr866        | 4             | 3               | 19               | 15             | 4              | 4                | 19                | 18              |
| 258552          | Olfr868        | 4             | 22              | 25               | 17             | 4              | 19               | 27                | 19              |
| 258555          | Olfr862        | 4             | 2               | 25               | 26             | 4              | 3                | 20                | 23              |
| 258557          | Olfr836        | 4             | 3               | 29               | 14             | 4              | 3                | 27                | 16              |
| 258558          | Olfr837        | 4             | 3               | 19               | 31             | 4              | 4                | 20                | 34              |
| 258559          | Olfr830        | 4             | 6               | 24               | 15             | 4              | 7                | 25                | 13              |
| 258560          | Olfr843        | 4             | 2               | 26               | 14             | 4              | 3                | 25                | 14              |
| 258561          | Olfr1012       | 6             | 2               | 35               | 22             | 5              | 3                | 38                | 24              |
| 258562          | Olfr1014       | 4             | 7               | 36               | 22             | 4              | 10               | 34                | 15              |
| 258563          | Olfr1006       | 5             | 5               | 113              | 31             | 5              | 8                | 107               | 21              |
| 258564          | Olfr1015       | 6             | 2               | 30               | 22             | 8              | 3                | 31                | 39              |
| 258565          | Olfr1009       | 5             | 25              | 22               | 18             | 5              | 32               | 18                | 15              |
| 258568          | Olfr1457       | 4             | 4               | 27               | 37             | 3              | 3                | 30                | 27              |
| 258569          | Olfr459        | 6             | 5               | 20               | 47             | 5              | 6                | 25                | 63              |
| 258570          | Olfr1043       | 5             | 38              | 31               | 33             | 5              | 47               | 35                | 34              |
| 258572          | Olfr1032       | 4             | 9               | 27               | 16             | 4              | 10               | 28                | 27              |
| 258573          | Olfr1020       | 4             | 3               | 24               | 53             | 5              | 3                | 25                | 44              |
| 258575          | Olfr1046       | 4             | 2               | 23               | 19             | 4              | 3                | 25                | 17              |
| 258577          | Olfr1026       | 5             | 39              | 30               | 17             | 5              | 44               | 30                | 19              |
| 258579          | Olfr1018       | 5             | 3               | 26               | 20             | 5              | 3                | 28                | 19              |
| 258580          | Olfr1023       | 4             | 2               | 29               | 17             | 5              | 3                | 30                | 16              |
| 258581          | Olfr1030       | 5             | 64              | 30               | 103            | 4              | 51               | 26                | 82              |

| NCBI<br>Gene ID | Gene<br>Symbol | Affy.<br>CD4+ | Agilent<br>CD4+ | Illumina<br>CD4+ | Nimbl.<br>CD4+ | Affy.<br>CD19+ | Agilent<br>CD19+ | Illumina<br>CD19+ | Nimbl.<br>CD19+ |
|-----------------|----------------|---------------|-----------------|------------------|----------------|----------------|------------------|-------------------|-----------------|
| 258582          | Olfr1022       | 4             | 25              | 21               | 18             | 4              | 23               | 24                | 16              |
| 258584          | Olfr1101       | 5             | 17              | 22               | 15             | 5              | 18               | 27                | 16              |
| 258585          | Olfr1086       | 4             | 13              | 30               | 13             | 5              | 9                | 25                | 16              |
| 258586          | Olfr1111       | 4             | 7               | 30               | 22             | 4              | 8                | 31                | 25              |
| 258587          | Olfr1100       | 4             | 2               | 18               | 13             | 4              | 3                | 20                | 14              |
| 258589          | Olfr703        | 4             | 17              | 29               | 18             | 5              | 17               | 33                | 25              |
| 258590          | Olfr702        | 4             | 2               | 33               | 51             | 4              | 3                | 28                | 39              |
| 258591          | Olfr695        | 4             | 3               | 38               | 27             | 4              | 3                | 34                | 42              |
| 258592          | Olfr697        | 5             | 5               | 34               | 33             | 5              | 4                | 30                | 36              |
| 258593          | Olfr700        | 5             | 8               | 23               | 27             | 5              | 7                | 23                | 21              |
| 258594          | Olfr710        | 9             | 3               | 15               | 16             | 8              | 7                | 17                | 18              |
| 258595          | Olfr698        | 5             | 3               | 22               | 17             | 6              | 3                | 23                | 16              |
| 258597          | Olfr716        | 6             | 20              | 34               | 44             | 5              | 19               | 35                | 43              |
| 258598          | Olfr828        | 5             | 5               | 24               | 21             | 5              | 6                | 23                | 33              |
| 258600          | Olfr270        | 5             | 6               | 27               | 18             | 5              | 5                | 25                | 19              |
| 258601          | Olfr984        | 7             | 7               | 23               | 31             | 8              | 17               | 25                | 31              |
| 258603          | Olfr972        | 4             | 2               | 22               | 19             | 4              | 3                | 24                | 19              |
| 258604          | Olfr970        | 4             | 13              | 23               | 49             | 4              | 10               | 26                | 60              |
| 258605          | Olfr968        | 4             | 2               | 25               | 14             | 5              | 2                | 26                | 13              |
| 258606          | Olfr973        | 4             | 72              | 25               | 21             | 4              | 57               | 28                | 20              |
| 258607          | Olfr971        | 4             | 127             | 25               | 18             | 5              | 114              | 31                | 18              |
| 258608          | Olfr986        | 6             | 6               | 22               | 20             | 6              | 9                | 20                | 20              |
| 258609          | Olfr305        | 5             | 2               | 29               | 17             | 5              | 3                | 29                | 17              |
| 258610          | Olfr307        | 5             | 3               | 43               | 18             | 5              | 3                | 37                | 17              |
| 258611          | Olfr297        | 4             | 14              | 31               | 18             | 4              | 25               | 30                | 15              |
| 258612          | Olfr303        | 5             | 4               | 24               | 21             | 5              | 10               | 20                | 27              |
| 258614          | Olfr308        | 4             | 2               | 29               | 41             | 5              | 6                | 22                | 35              |
| 258615          | Olfr360        | 6             | 47              | 21               | 13             | 6              | 53               | 23                | 20              |
| 258616          | Olfr357        | 5             | 42              | 23               | 24             | 4              | 34               | 23                | 38              |
| 258617          | Olfr356        | 6             | 2               | 27               | 39             | 6              | 3                | 25                | 77              |
| 258618          | Olfr355        | 5             | 16              | 24               | 16             | 5              | 15               | 21                | 13              |
| 258620          | Olfr350        | 5             | 7               | 22               | 14             | 5              | 17               | 27                | 15              |
| 258621          | Olfr344        | 4             | 13              | 26               | 21             | 4              | 22               | 27                | 17              |
| 258623          | Olfr123        | 5             | 39              | 29               | 17             | 6              | 27               | 26                | 15              |
| 258624          | Olfr120        | 5             | 3               | 28               | 14             | 6              | 6                | 23                | 16              |
| 258626          | Olfr1501       | 4             | 21              | 21               | 22             | 4              | 23               | 24                | 25              |
| 258627          | Olfr1504       | 5             | 7               | 22               | 18             | 6              | 11               | 26                | 20              |
| 258628          | Olfr1489       | 4             | 2               | 21               | 17             | 4              | 3                | 19                | 21              |
| 258629          | Olfr1487       | 4             | 19              | 25               | 25             | 5              | 20               | 24                | 16              |
| 258630          | Olfr1141       | 4             | 4               | 20               | 88             | 5              | 3                | 18                | 84              |
| 258631          | Olfr1151       | 4             | 2               | 26               | 15             | 5              | 3                | 27                | 19              |
| 258632          | Olfr1138       | 4             | 3               | 24               | 19             | 4              | 4                | 27                | 15              |
| 258633          | Olfr1153       | 5             | 210             | 21               | 22             | 7              | 224              | 24                | 17              |
| 258634          | Olfr1164       | 5             | 3               | 25               | 18             | 4              | 3                | 22                | 20              |
| 258635          | Olfr1140       | 4             | 22              | 29               | 17             | 4              | 19               | 25                | 17              |
| 258636          | Olfr1155       | 7             | 3               | 23               | 21             | 7              | 3                | 19                | 24              |
| 258638          | Olfr1163       | 4             | 31              | 38               | 22             | 4              | 25               | 37                | 26              |
| 258639          | Olfr1158       | 5             | 2               | 48               | 19             | 5              | 3                | 46                | 20              |
| 258640          | Olfr152        | 5             | 4               | 28               | 16             | 5              | 3                | 29                | 15              |
| 258641          | Olfr1154       | 4             | 2               | 27               | 17             | 5              | 3                | 27                | 18              |
| 258642          | Olfr1165       | 4             | 5               | 23               | 30             | 5              | 10               | 23                | 34              |

| NCBI<br>Gene ID | Gene<br>Symbol | Affy.<br>CD4+ | Agilent<br>CD4+ | Illumina<br>CD4+ | Nimbl.<br>CD4+ | Affy.<br>CD19+ | Agilent<br>CD19+ | Illumina<br>CD19+ | Nimbl.<br>CD19+ |
|-----------------|----------------|---------------|-----------------|------------------|----------------|----------------|------------------|-------------------|-----------------|
| 258643          | Olfr1160       | 4             | 3               | 25               | 19             | 3              | 3                | 24                | 15              |
| 258644          | Olfr1166       | 4             | 2               | 27               | 19             | 5              | 3                | 26                | 19              |
| 258645          | Olfr1403       | 5             | 14              | 22               | 38             | 7              | 19               | 20                | 56              |
| 258647          | Olfr435        | 8             | 19              | 20               | 22             | 9              | 23               | 20                | 28              |
| 258648          | Olfr438        | 5             | 17              | 86               | 106            | 6              | 11               | 79                | 108             |
| 258649          | Olfr441        | 7             | 48              | 28               | 23             | 7              | 44               | 32                | 16              |
| 258650          | Olfr444        | 5             | 20              | 28               | 117            | 5              | 14               | 27                | 56              |
| 258652          | Olfr1131       | 4             | 86              | 18               | 30             | 3              | 60               | 21                | 29              |
| 258653          | Olfr1136       | 5             | 2               | 29               | 39             | 4              | 3                | 32                | 35              |
| 258654          | Olfr1135       | 4             | 2               | 32               | 30             | 4              | 3                | 31                | 16              |
| 258655          | Olfr1112       | 4             | 24              | 25               | 65             | 5              | 16               | 25                | 58              |
| 258656          | Olfr365        | 7             | 9               | 23               | 36             | 8              | 5                | 22                | 34              |
| 258658          | Olfr734        | 5             | 3               | 29               | 25             | 5              | 3                | 31                | 19              |
| 258660          | Olfr736        | 5             | 11              | 20               | 33             | 5              | 6                | 17                | 38              |
| 258661          | Olfr740        | 5             | 59              | 20               | 19             | 5              | 54               | 24                | 20              |
| 258662          | Olfr738        | 5             | 22              | 30               | 41             | 5              | 24               | 31                | 36              |
| 258663          | Olfr739        | 3             | 26              | 29               | 14             | 3              | 28               | 27                | 13              |
| 258665          | Olfr815        | 4             | 6               | 21               | 45             | 4              | 14               | 21                | 43              |
| 258666          | Olfr822        | 4             | 16              | 34               | 23             | 4              | 10               | 30                | 37              |
| 258667          | Olfr816        | 4             | 2               | 38               | 12             | 4              | 3                | 37                | 18              |
| 258668          | Olfr823        | 4             | 3               | 24               | 19             | 3              | 4                | 24                | 14              |
| 258670          | Olfr820        | 4             | 3               | 28               | 25             | 4              | 3                | 28                | 28              |
| 258671          | Olfr826        | 4             | 7               | 24               | 16             | 4              | 10               | 28                | 16              |
| 258672          | Olfr825        | 5             | 7               | 21               | 31             | 5              | 13               | 20                | 51              |
| 258673          | Olfr1428       | 6             | 10              | 25               | 20             | 5              | 13               | 22                | 21              |
| 258674          | Olfr1427       | 6             | 19              | 18               | 15             | 7              | 16               | 24                | 16              |
| 258675          | Olfr1423       | 5             | 4               | 23               | 34             | 5              | 3                | 20                | 39              |
| 258676          | Olfr1424       | 5             | 7               | 25               | 20             | 5              | 11               | 23                | 17              |
| 258677          | Olfr76         | 6             | 42              | 29               | 27             | 6              | 44               | 31                | 27              |
| 258678          | Olfr1441       | 6             | 66              | 40               | 37             | 5              | 69               | 35                | 43              |
| 258679          | Olfr1440       | 5             | 2               | 27               | 13             | 5              | 3                | 27                | 13              |
| 258680          | Olfr1433       | 4             | 2               | 18               | 15             | 4              | 5                | 21                | 19              |
| 258682          | Olfr1436       | 4             | 25              | 24               | 12             | 5              | 21               | 24                | 14              |
| 258683          | Olfr262        | 5             | 3               | 28               | 12             | 5              | 3                | 30                | 12              |
| 258684          | Olfr1459       | 4             | 40              | 19               | 17             | 5              | 50               | 19                | 20              |
| 258685          | Olfr1472       | 5             | 8               | 30               | 28             | 5              | 9                | 31                | 40              |
| 258686          | Olfr1467       | 5             | 5               | 20               | 82             | 5              | 6                | 24                | 41              |
| 258687          | Olfr1454       | 4             | 3               | 29               | 13             | 3              | 3                | 30                | 13              |
| 258688          | Olfr1462       | 4             | 3               | 24               | 20             | 4              | 3                | 25                | 26              |
| 258690          | Olfr1469       | 4             | 3               | 20               | 22             | 4              | 9                | 21                | 20              |
| 258691          | Olfr1477       | 4             | 3               | 20               | 19             | 4              | 5                | 20                | 38              |
| 258692          | Olfr1442       | 4             | 30              | 27               | 13             | 5              | 28               | 24                | 17              |
| 258694          | Olfr1445       | 5             | 42              | 23               | 36             | 4              | 45               | 24                | 49              |
| 258695          | Olfr1453       | 5             | 4               | 26               | 26             | 5              | 3                | 25                | 19              |
| 258696          | Olfr1448       | 4             | 14              | 21               | 14             | 5              | 15               | 21                | 20              |
| 258697          | Olfr1444       | 4             | 76              | 25               | 21             | 4              | 106              | 26                | 28              |
| 258698          | Olfr1447       | 4             | 9               | 25               | 16             | 4              | 5                | 25                | 24              |
| 258699          | Olfr1446       | 4             | 4               | 32               | 14             | 4              | 5                | 36                | 15              |
| 258700          | Olfr1451       | 5             | 14              | 24               | 25             | 4              | 15               | 18                | 22              |
| 258701          | Olfr401        | 19            | 17              | 25               | 32             | 18             | 12               | 28                | 31              |
| 258702          | Olfr410        | 5             | 25              | 21               | 20             | 5              | 26               | 20                | 24              |

| NCBI<br>Gene ID | Gene<br>Symbol | Affy.<br>CD4+ | Agilent<br>CD4+ | Illumina<br>CD4+ | Nimbl.<br>CD4+ | Affy.<br>CD19+ | Agilent<br>CD19+ | Illumina<br>CD19+ | Nimbl.<br>CD19+ |
|-----------------|----------------|---------------|-----------------|------------------|----------------|----------------|------------------|-------------------|-----------------|
| 258703          | Olfr402        | 5             | 3               | 33               | 28             | 5              | 3                | 25                | 29              |
| 258704          | Olfr411        | 10            | 50              | 26               | 29             | 11             | 47               | 24                | 25              |
| 258705          | Olfr398        | 10            | 57              | 21               | 82             | 12             | 74               | 22                | 84              |
| 258706          | Olfr43         | 4             | 76              | 33               | 23             | 5              | 60               | 37                | 24              |
| 258708          | Olfr1342       | 5             | 58              | 23               | 45             | 5              | 49               | 22                | 70              |
| 258709          | Olfr415        | 4             | 5               | 28               | 27             | 4              | 5                | 29                | 50              |
| 258710          | Olfr419        | 8             | 24              | 20               | 31             | 7              | 26               | 17                | 74              |
| 258711          | Olfr432        | 5             | 2               | 23               | 27             | 5              | 3                | 28                | 30              |
| 258712          | Olfr433        | 9             | 3               | 23               | 30             | 10             | 5                | 25                | 84              |
| 258713          | Olfr430        | 5             | 186             | 20               | 20             | 5              | 190              | 17                | 23              |
| 258715          | Olfr421        | 4             | 4               | 28               | 18             | 4              | 6                | 26                | 17              |
| 258716          | Olfr424        | 7             | 4               | 22               | 17             | 8              | 6                | 20                | 23              |
| 258717          | Olfr429        | 6             | 8               | 32               | 22             | 6              | 8                | 27                | 19              |
| 258718          | Olfr513        | 6             | 38              | 29               | 27             | 7              | 48               | 28                | 40              |
| 258719          | Olfr512        | 4             | 2               | 27               | 21             | 4              | 3                | 21                | 24              |
| 258720          | Olfr516        | 4             | 14              | 22               | 19             | 4              | 11               | 18                | 19              |
| 258721          | Olfr514        | 6             | 7               | 19               | 45             | 6              | 12               | 20                | 51              |
| 258722          | Olfr611        | 6             | 60              | 27               | 34             | 5              | 65               | 25                | 50              |
| 258723          | Olfr781        | 4             | 6               | 28               | 27             | 4              | 8                | 25                | 30              |
| 258724          | Olfr784        | 5             | 10              | 19               | 30             | 5              | 8                | 20                | 59              |
| 258725          | Olfr1095       | 3             | 9               | 20               | 20             | 3              | 16               | 17                | 16              |
| 258726          | Olfr599        | 4             | 16              | 22               | 24             | 6              | 17               | 18                | 34              |
| 258727          | Olfr488        | 4             | 5               | 21               | 15             | 4              | 3                | 20                | 19              |
| 258728          | Olfr482        | 4             | 10              | 24               | 38             | 4              | 14               | 26                | 79              |
| 258729          | Olfr478        | 4             | 22              | 27               | 15             | 5              | 18               | 29                | 14              |
| 258730          | Olfr483        | 4             | 68              | 21               | 20             | 4              | 59               | 24                | 24              |
| 258731          | Olfr491        | 5             | 2               | 30               | 27             | 4              | 5                | 27                | 32              |
| 258732          | Olfr494        | 5             | 20              | 23               | 18             | 6              | 26               | 25                | 22              |
| 258733          | Olfr497        | 5             | 22              | 25               | 20             | 5              | 28               | 26                | 26              |
| 258734          | Olfr502        | 5             | 17              | 22               | 16             | 5              | 16               | 21                | 23              |
| 258736          | Olfr1497       | 6             | 10              | 26               | 47             | 6              | 13               | 21                | 43              |
| 258737          | Olfr1316       | 4             | 15              | 40               | 21             | 4              | 19               | 40                | 20              |
| 258738          | Olfr507        | 4             | 8               | 28               | 19             | 4              | 11               | 33                | 25              |
| 258739          | Olfr1362       | 8             | 12              | 23               | 22             | 7              | 15               | 23                | 18              |
| 258740          | Olfr957        | 5             | 38              | 18               | 18             | 6              | 22               | 22                | 22              |
| 258741          | Olfr935        | 4             | 3               | 24               | 17             | 4              | 3                | 24                | 17              |
| 258742          | Olfr146        | 4             | 2               | 31               | 14             | 4              | 2                | 32                | 14              |
| 258743          | Olfr661        | 5             | 54              | 25               | 24             | 5              | 47               | 28                | 30              |
| 258744          | Olfr875        | 5             | 12              | 27               | 17             | 4              | 18               | 26                | 17              |
| 258745          | Olfr689        | 5             | 11              | 24               | 17             | 5              | 14               | 20                | 18              |
| 258746          | Olfr648        | 5             | 38              | 29               | 16             | 5              | 36               | 30                | 19              |
| 258747          | Olfr1106       | 4             | 8               | 31               | 17             | 4              | 9                | 34                | 16              |
| 258748          | Olfr1195       | 4             | 10              | 37               | 29             | 4              | 6                | 35                | 32              |
| 258749          | Olfr556        | 5             | 3               | 23               | 38             | 5              | 3                | 18                | 49              |
| 258750          | Olfr551        | 9             | 6               | 40               | 17             | 8              | 6                | 40                | 18              |
| 258751          | Olfr608        | 5             | 36              | 21               | 25             | 6              | 41               | 25                | 23              |
| 258753          | Olfr678        | 13            | 2               | 27               | 17             | 16             | 2                | 31                | 17              |
| 258754          | Olfr214        | 5             | 23              | 24               | 29             | 5              | 22               | 22                | 30              |
| 258755          | Olfr672        | 4             | 9               | 33               | 28             | 4              | 5                | 31                | 27              |
| 258756          | Olfr414        | 8             | 75              | 28               | 58             | 7              | 65               | 28                | 44              |
| 258762          | Olfr1109       | 5             | 12              | 25               | 14             | 4              | 14               | 28                | 17              |

| NCBI<br>Gene ID | Gene<br>Symbol | Affy.<br>CD4+ | Agilent<br>CD4+ | Illumina<br>CD4+ | Nimbl.<br>CD4+ | Affy.<br>CD19+ | Agilent<br>CD19+ | Illumina<br>CD19+ | Nimbl.<br>CD19+ |
|-----------------|----------------|---------------|-----------------|------------------|----------------|----------------|------------------|-------------------|-----------------|
| 258763          | Olfr1104       | 6             | 5               | 23               | 23             | 6              | 6                | 24                | 47              |
| 258764          | Olfr1099       | 4             | 15              | 15               | 26             | 5              | 25               | 20                | 34              |
| 258765          | Olfr1110       | 6             | 3               | 25               | 25             | 6              | 3                | 24                | 28              |
| 258766          | Olfr259        | 4             | 22              | 38               | 22             | 4              | 30               | 29                | 15              |
| 258767          | Olfr1176       | 4             | 5               | 23               | 16             | 4              | 3                | 24                | 16              |
| 258768          | Olfr1189       | 5             | 6               | 21               | 16             | 4              | 9                | 17                | 18              |
| 258769          | Olfr508        | 4             | 56              | 22               | 16             | 4              | 59               | 21                | 22              |
| 258770          | Olfr472        | 4             | 2               | 25               | 23             | 4              | 3                | 25                | 18              |
| 258771          | Olfr473        | 5             | 3               | 29               | 15             | 5              | 3                | 31                | 14              |
| 258772          | Olfr821        | 7             | 63              | 23               | 16             | 6              | 51               | 21                | 21              |
| 258773          | Olfr818        | 4             | 2               | 33               | 15             | 4              | 3                | 32                | 27              |
| 258774          | Olfr1208       | 4             | 11              | 26               | 19             | 5              | 10               | 23                | 25              |
| 258775          | Olfr196        | 4             | 5               | 26               | 13             | 4              | 5                | 28                | 18              |
| 258776          | Olfr715        | 4             | 25              | 20               | 18             | 5              | 30               | 22                | 15              |
| 258777          | Olfr922        | 4             | 9               | 26               | 16             | 4              | 6                | 28                | 14              |
| 258778          | Olfr921        | 4             | 26              | 18               | 22             | 4              | 32               | 19                | 22              |
| 258780          | Olfr916        | 4             | 3               | 30               | 23             | 5              | 5                | 35                | 24              |
| 258781          | Olfr915        | 5             | 3               | 23               | 19             | 5              | 3                | 27                | 24              |
| 258782          | Olfr914        | 5             | 17              | 22               | 22             | 4              | 16               | 25                | 34              |
| 258783          | Olfr920        | 5             | 25              | 25               | 39             | 4              | 23               | 24                | 20              |
| 258784          | Olfr1245       | 4             | 16              | 21               | 31             | 4              | 14               | 16                | 19              |
| 258785          | Olfr1230       | 5             | 11              | 20               | 34             | 5              | 15               | 22                | 24              |
| 258786          | Olfr1238       | 4             | 3               | 23               | 40             | 4              | 3                | 25                | 34              |
| 258787          | Olfr1248       | 4             | 2               | 33               | 14             | 3              | 3                | 34                | 15              |
| 258788          | Olfr1246       | 4             | 7               | 19               | 17             | 4              | 8                | 21                | 18              |
| 258789          | Olfr1271       | 4             | 7               | 22               | 34             | 5              | 9                | 22                | 38              |
| 258790          | Olfr1263       | 4             | 25              | 25               | 20             | 4              | 26               | 25                | 17              |
| 258791          | Olfr812        | 5             | 27              | 25               | 25             | 5              | 39               | 22                | 24              |
| 258792          | Olfr1499       | 4             | 4               | 28               | 26             | 5              | 3                | 28                | 25              |
| 258793          | Olfr1502       | 4             | 2               | 26               | 22             | 4              | 3                | 25                | 21              |
| 258794          | Olfr878        | 5             | 2               | 22               | 14             | 6              | 3                | 22                | 15              |
| 258797          | Olfr904        | 4             | 9               | 28               | 12             | 4              | 10               | 27                | 13              |
| 258798          | Olfr902        | 4             | 4               | 23               | 12             | 4              | 3                | 27                | 14              |
| 258799          | Olfr906        | 4             | 81              | 19               | 23             | 4              | 75               | 21                | 16              |
| 258800          | Olfr905        | 4             | 2               | 25               | 21             | 4              | 3                | 25                | 20              |
| 258801          | Olfr907        | 5             | 6               | 36               | 23             | 5              | 7                | 34                | 46              |
| 258802          | Olfr143        | 5             | 5               | 28               | 18             | 4              | 3                | 28                | 20              |
| 258803          | Olfr136        | 3             | 21              | 26               | 18             | 3              | 26               | 29                | 20              |
| 258804          | Olfr1240       | 5             | 26              | 45               | 16             | 5              | 23               | 47                | 16              |
| 258805          | Olfr1426       | 5             | 5               | 18               | 26             | 5              | 8                | 20                | 46              |
| 258806          | Olfr912        | 4             | 3               | 19               | 19             | 4              | 3                | 18                | 22              |
| 258807          | Olfr910        | 4             | 9               | 22               | 53             | 4              | 11               | 21                | 66              |
| 258808          | Olfr620        | 4             | 17              | 35               | 35             | 5              | 25               | 39                | 21              |
| 258809          | Olfr651        | 6             | 8               | 20               | 18             | 7              | 12               | 21                | 18              |
| 258810          | Olfr665        | 5             | 5               | 31               | 22             | 5              | 11               | 34                | 30              |
| 258811          | Olfr926        | 4             | 2               | 23               | 23             | 4              | 4                | 24                | 27              |
| 258812          | Olfr923        | 5             | 2               | 23               | 56             | 5              | 2                | 25                | 41              |
| 258814          | Olfr1156       | 5             | 16              | 22               | 16             | 5              | 20               | 24                | 12              |
| 258815          | Olfr1218       | 4             | 44              | 35               | 120            | 4              | 29               | 37                | 184             |
| 258816          | Olfr466        | 5             | 2               | 23               | 38             | 5              | 3                | 24                | 46              |
| 258817          | Olfr655        | 4             | 30              | 23               | 29             | 4              | 23               | 24                | 26              |



| NCBI<br>Gene ID | Gene<br>Symbol | Affy.<br>CD4+ | Agilent<br>CD4+ | Illumina<br>CD4+ | Nimbl.<br>CD4+ | Affy.<br>CD19+ | Agilent<br>CD19+ | Illumina<br>CD19+ | Nimbl.<br>CD19+ |
|-----------------|----------------|---------------|-----------------|------------------|----------------|----------------|------------------|-------------------|-----------------|
| 258818          | Olfr629        | 4             | 3               | 36               | 19             | 4              | 5                | 37                | 16              |
| 258819          | Olfr640        | 5             | 10              | 21               | 19             | 5              | 7                | 20                | 17              |
| 258820          | Olfr1184       | 5             | 27              | 29               | 20             | 5              | 20               | 29                | 20              |
| 258821          | Olfr273        | 5             | 2               | 21               | 14             | 5              | 2                | 20                | 17              |
| 258822          | Olfr39         | 5             | 3               | 18               | 13             | 5              | 3                | 21                | 12              |
| 258823          | Olfr969        | 4             | 10              | 22               | 14             | 4              | 9                | 26                | 15              |
| 258824          | Olfr983        | 6             | 7               | 25               | 23             | 7              | 13               | 24                | 24              |
| 258825          | Olfr975        | 6             | 23              | 31               | 20             | 7              | 26               | 28                | 14              |
| 258829          | Olfr134        | 4             | 7               | 27               | 21             | 4              | 3                | 29                | 19              |
| 258830          | Olfr103        | 5             | 25              | 32               | 16             | 5              | 39               | 35                | 16              |
| 258832          | Olfr109        | 5             | 2               | 26               | 30             | 5              | 2                | 28                | 39              |
| 258833          | Olfr1132       | 6             | 2               | 19               | 16             | 5              | 3                | 20                | 15              |
| 258834          | Olfr1130       | 4             | 9               | 20               | 12             | 5              | 9                | 24                | 13              |
| 258836          | Olfr272        | 5             | 14              | 24               | 18             | 5              | 16               | 24                | 22              |
| 258838          | Olfr617        | 4             | 24              | 29               | 16             | 5              | 21               | 31                | 19              |
| 258840          | Olfr1097       | 4             | 12              | 21               | 36             | 4              | 10               | 23                | 43              |
| 258841          | Olfr1107       | 4             | 6               | 37               | 27             | 4              | 3                | 39                | 22              |
| 258843          | Olfr1087       | 4             | 4               | 28               | 29             | 4              | 4                | 30                | 32              |
| 258844          | Olfr1090       | 5             | 10              | 20               | 70             | 5              | 16               | 21                | 37              |
| 258845          | Olfr1161       | 4             | 7               | 30               | 21             | 4              | 13               | 28                | 17              |
| 258846          | Olfr1157       | 4             | 2               | 25               | 17             | 4              | 3                | 25                | 26              |
| 258850          | Olfr295        | 4             | 14              | 23               | 56             | 4              | 19               | 30                | 28              |
| 258851          | Olfr1339       | 6             | 56              | 34               | 25             | 6              | 57               | 33                | 19              |
| 258852          | Olfr1341       | 5             | 26              | 32               | 55             | 5              | 28               | 27                | 74              |
| 258853          | Olfr982        | 9             | 6               | 26               | 63             | 11             | 6                | 26                | 100             |
| 258854          | Olfr985        | 5             | 11              | 22               | 28             | 5              | 6                | 22                | 36              |
| 258857          | Olfr275        | 5             | 12              | 22               | 18             | 6              | 4                | 19                | 15              |
| 258859          | Olfr161        | 4             | 55              | 22               | 16             | 5              | 50               | 25                | 18              |
| 258861          | Olfr763        | 6             | 8               | 33               | 59             | 6              | 4                | 36                | 75              |
| 258862          | Olfr770        | 4             | 13              | 20               | 35             | 4              | 9                | 28                | 71              |
| 258863          | Olfr768        | 4             | 4               | 23               | 16             | 4              | 5                | 23                | 15              |
| 258865          | Olfr992        | 4             | 8               | 22               | 18             | 4              | 13               | 30                | 24              |
| 258866          | Olfr1008       | 5             | 3               | 21               | 20             | 4              | 3                | 23                | 15              |
| 258867          | Olfr131        | 5             | 5               | 31               | 30             | 4              | 4                | 30                | 41              |
| 258868          | Olfr894        | 4             | 8               | 29               | 17             | 5              | 13               | 26                | 17              |
| 258871          | Olfr898        | 5             | 4               | 51               | 23             | 5              | 5                | 54                | 21              |
| 258872          | Olfr908        | 4             | 2               | 23               | 29             | 4              | 5                | 24                | 33              |
| 258873          | Olfr909        | 4             | 2               | 20               | 16             | 4              | 3                | 22                | 16              |
| 258875          | Olfr895        | 4             | 11              | 28               | 13             | 4              | 14               | 28                | 12              |
| 258877          | Olfr1395       | 12            | 52              | 29               | 158            | 13             | 56               | 28                | 104             |
| 258879          | Olfr330        | 6             | 2               | 28               | 21             | 6              | 3                | 26                | 27              |
| 258880          | Olfr218        | 4             | 27              | 38               | 25             | 4              | 21               | 36                | 26              |
| 258881          | Olfr1404       | 4             | 14              | 33               | 12             | 4              | 8                | 29                | 14              |
| 258882          | Olfr874        | 6             | 3               | 27               | 15             | 6              | 5                | 31                | 16              |
| 258883          | Olfr876        | 5             | 12              | 26               | 13             | 5              | 20               | 21                | 14              |
| 258886          | Olfr1299       | 4             | 4               | 24               | 15             | 4              | 8                | 22                | 14              |
| 258887          | Olfr1294       | 5             | 3               | 21               | 20             | 5              | 6                | 21                | 22              |
| 258888          | Olfr1298       | 4             | 7               | 20               | 16             | 4              | 3                | 20                | 20              |
| 258889          | Olfr1301       | 5             | 2               | 22               | 13             | 4              | 3                | 24                | 12              |
| 258890          | Olfr1297       | 4             | 2               | 17               | 22             | 5              | 3                | 21                | 23              |
| 258891          | Olfr1302       | 4             | 4               | 22               | 19             | 4              | 5                | 22                | 22              |

| NCBI<br>Gene ID | Gene<br>Symbol | Affy.<br>CD4+ | Agilent<br>CD4+ | Illumina<br>CD4+ | Nimbl.<br>CD4+ | Affy.<br>CD19+ | Agilent<br>CD19+ | Illumina<br>CD19+ | Nimbl.<br>CD19+ |
|-----------------|----------------|---------------|-----------------|------------------|----------------|----------------|------------------|-------------------|-----------------|
| 258893          | Olfr1225       | 4             | 35              | 26               | 18             | 4              | 33               | 29                | 21              |
| 258894          | Olfr1223       | 4             | 12              | 26               | 18             | 4              | 18               | 25                | 20              |
| 258895          | Olfr1216       | 4             | 4               | 24               | 22             | 4              | 4                | 30                | 26              |
| 258899          | Olfr1214       | 4             | 2               | 25               | 23             | 4              | 3                | 23                | 22              |
| 258900          | Olfr1213       | 4             | 2               | 22               | 21             | 5              | 3                | 18                | 24              |
| 258901          | Olfr1219       | 5             | 15              | 51               | 28             | 5              | 11               | 58                | 31              |
| 258902          | Olfr1220       | 4             | 2               | 22               | 17             | 4              | 3                | 23                | 16              |
| 258903          | Olfr1217       | 4             | 8               | 28               | 38             | 4              | 7                | 29                | 31              |
| 258904          | Olfr1221       | 4             | 30              | 53               | 15             | 4              | 37               | 48                | 13              |
| 258905          | Olfr871        | 5             | 8               | 23               | 13             | 5              | 4                | 20                | 17              |
| 258907          | Olfr851        | 4             | 7               | 25               | 18             | 4              | 11               | 25                | 19              |
| 258908          | Olfr853        | 4             | 2               | 22               | 20             | 4              | 3                | 24                | 14              |
| 258910          | Olfr1280       | 4             | 63              | 23               | 23             | 4              | 58               | 28                | 20              |
| 258912          | Olfr1378       | 5             | 8               | 24               | 33             | 6              | 8                | 21                | 31              |
| 258913          | Olfr1377       | 6             | 7               | 22               | 43             | 6              | 7                | 28                | 63              |
| 258914          | Olfr211        | 6             | 2               | 23               | 147            | 5              | 3                | 21                | 187             |
| 258915          | Olfr1348       | 6             | 19              | 22               | 61             | 6              | 29               | 23                | 123             |
| 258917          | Olfr1336       | 5             | 3               | 26               | 188            | 6              | 4                | 25                | 239             |
| 258918          | Olfr1346       | 11            | 16              | 21               | 27             | 12             | 21               | 24                | 27              |
| 258919          | Olfr1179       | 5             | 4               | 21               | 19             | 5              | 6                | 22                | 16              |
| 258920          | Olfr1180       | 4             | 13              | 21               | 17             | 4              | 12               | 16                | 21              |
| 258921          | Olfr1188       | 4             | 2               | 34               | 28             | 5              | 3                | 32                | 27              |
| 258922          | Olfr267        | 7             | 3               | 22               | 37             | 6              | 3                | 25                | 27              |
| 258923          | Olfr1          | 6             | 40              | 19               | 12             | 6              | 37               | 21                | 13              |
| 258925          | Olfr20         | 6             | 2               | 27               | 26             | 6              | 3                | 21                | 35              |
| 258927          | Olfr481        | 5             | 8               | 26               | 40             | 5              | 9                | 29                | 42              |
| 258929          | Olfr799        | 4             | 22              | 21               | 24             | 5              | 20               | 26                | 28              |
| 258930          | Olfr808        | 4             | 5               | 25               | 26             | 4              | 4                | 26                | 18              |
| 258931          | Olfr807        | 9             | 7               | 26               | 22             | 10             | 13               | 28                | 17              |
| 258932          | Olfr791        | 5             | 19              | 22               | 30             | 5              | 31               | 22                | 31              |
| 258933          | Olfr796        | 11            | 27              | 27               | 59             | 10             | 21               | 27                | 37              |
| 258934          | Olfr802        | 5             | 3               | 21               | 18             | 5              | 4                | 24                | 18              |
| 258935          | Olfr790        | 4             | 14              | 20               | 18             | 5              | 14               | 23                | 20              |
| 258937          | Olfr167        | 5             | 8               | 16               | 81             | 4              | 11               | 23                | 43              |
| 258938          | Olfr1417       | 8             | 19              | 21               | 48             | 7              | 23               | 24                | 26              |
| 258939          | Olfr63         | 8             | 33              | 24               | 51             | 9              | 37               | 24                | 53              |
| 258940          | Olfr346        | 4             | 15              | 20               | 17             | 4              | 14               | 23                | 21              |
| 258941          | Olfr354        | 6             | 15              | 15               | 18             | 6              | 12               | 21                | 40              |
| 258942          | Olfr352        | 4             | 3               | 18               | 56             | 4              | 4                | 26                | 135             |
| 258943          | Olfr353        | 5             | 18              | 33               | 37             | 5              | 15               | 28                | 29              |
| 258944          | Olfr351        | 5             | 5               | 28               | 21             | 6              | 7                | 30                | 22              |
| 258945          | Olfr347        | 4             | 19              | 23               | 53             | 5              | 13               | 19                | 38              |
| 258946          | Olfr348        | 4             | 4               | 28               | 16             | 4              | 3                | 28                | 27              |
| 258947          | Olfr345        | 4             | 3               | 32               | 15             | 4              | 7                | 28                | 17              |
| 258949          | Olfr338        | 4             | 18              | 28               | 29             | 4              | 17               | 29                | 20              |
| 258950          | Olfr342        | 4             | 12              | 21               | 15             | 3              | 15               | 20                | 15              |
| 258951          | Olfr339        | 4             | 47              | 27               | 22             | 4              | 20               | 24                | 18              |
| 258952          | Olfr341        | 5             | 23              | 24               | 14             | 5              | 19               | 27                | 17              |
| 258953          | Olfr340        | 4             | 19              | 25               | 36             | 4              | 13               | 24                | 24              |
| 258954          | Olfr522        | 9             | 39              | 28               | 26             | 9              | 33               | 23                | 24              |
| 258955          | Olfr531        | 4             | 37              | 21               | 29             | 5              | 31               | 18                | 19              |

| NCBI<br>Gene ID | Gene<br>Symbol | Affy.<br>CD4+ | Agilent<br>CD4+ | Illumina<br>CD4+ | Nimbl.<br>CD4+ | Affy.<br>CD19+ | Agilent<br>CD19+ | Illumina<br>CD19+ | Nimbl.<br>CD19+ |
|-----------------|----------------|---------------|-----------------|------------------|----------------|----------------|------------------|-------------------|-----------------|
| 258956          | Olfr535        | 5             | 13              | 39               | 25             | 6              | 10               | 41                | 36              |
| 258959          | Olfr170        | 5             | 18              | 24               | 14             | 5              | 14               | 23                | 16              |
| 258960          | Olfr171        | 4             | 3               | 33               | 14             | 3              | 3                | 33                | 15              |
| 258961          | Olfr631        | 4             | 2               | 18               | 17             | 4              | 3                | 21                | 17              |
| 258962          | Olfr53         | 5             | 16              | 21               | 19             | 5              | 14               | 26                | 33              |
| 258963          | Olfr539        | 5             | 9               | 18               | 25             | 5              | 10               | 24                | 27              |
| 258964          | Olfr541        | 4             | 2               | 28               | 22             | 4              | 7                | 31                | 16              |
| 258968          | Olfr1247       | 4             | 2               | 20               | 16             | 4              | 3                | 20                | 19              |
| 258969          | Olfr1226       | 7             | 53              | 24               | 21             | 7              | 26               | 21                | 21              |
| 258970          | Olfr1242       | 5             | 2               | 23               | 16             | 5              | 4                | 22                | 19              |
| 258971          | Olfr1243       | 5             | 4               | 23               | 25             | 5              | 5                | 25                | 19              |
| 258972          | Olfr1239       | 4             | 3               | 19               | 49             | 5              | 3                | 18                | 52              |
| 258973          | Olfr1228       | 4             | 3               | 21               | 16             | 4              | 3                | 27                | 16              |
| 258974          | Olfr1233       | 4             | 2               | 26               | 42             | 5              | 3                | 25                | 38              |
| 258975          | Olfr1234       | 4             | 2               | 27               | 15             | 4              | 3                | 23                | 17              |
| 258976          | Olfr1262       | 6             | 2               | 28               | 109            | 6              | 3                | 27                | 152             |
| 258977          | Olfr1273       | 4             | 6               | 33               | 31             | 4              | 7                | 28                | 20              |
| 258979          | Olfr1255       | 4             | 25              | 30               | 22             | 4              | 23               | 25                | 22              |
| 258980          | Olfr1258       | 5             | 10              | 25               | 15             | 5              | 11               | 27                | 17              |
| 258983          | Olfr1260       | 5             | 25              | 24               | 22             | 5              | 24               | 24                | 17              |
| 258985          | Olfr1256       | 5             | 10              | 24               | 14             | 5              | 4                | 23                | 15              |
| 258987          | Olfr1270       | 6             | 24              | 32               | 16             | 5              | 31               | 30                | 14              |
| 258988          | Olfr38         | 4             | 18              | 22               | 19             | 4              | 18               | 24                | 16              |
| 258990          | Olfr447        | 5             | 11              | 23               | 30             | 5              | 12               | 27                | 22              |
| 258991          | Olfr1496       | 4             | 6               | 26               | 26             | 4              | 8                | 24                | 21              |
| 258992          | Olfr1494       | 5             | 3               | 29               | 15             | 4              | 5                | 29                | 17              |
| 258993          | Olfr206        | 4             | 11              | 22               | 18             | 4              | 16               | 23                | 18              |
| 258996          | Olfr201        | 4             | 2               | 21               | 32             | 4              | 3                | 25                | 27              |
| 258997          | Olfr202        | 5             | 5               | 22               | 34             | 5              | 8                | 22                | 34              |
| 258999          | Olfr178        | 4             | 2               | 25               | 15             | 4              | 3                | 25                | 21              |
| 259000          | Olfr195        | 4             | 88              | 25               | 16             | 4              | 89               | 30                | 17              |
| 259001          | Olfr181        | 4             | 23              | 25               | 14             | 4              | 23               | 27                | 18              |
| 259003          | Olfr172        | 6             | 7               | 25               | 70             | 6              | 4                | 28                | 48              |
| 259004          | Olfr174        | 4             | 98              | 18               | 13             | 4              | 113              | 19                | 13              |
| 259005          | Olfr139        | 10            | 25              | 31               | 19             | 10             | 23               | 30                | 24              |
| 259006          | Olfr399        | 5             | 33              | 19               | 22             | 6              | 35               | 22                | 30              |
| 259007          | Olfr395        | 5             | 3               | 27               | 25             | 4              | 3                | 26                | 37              |
| 259008          | Olfr392        | 4             | 2               | 26               | 18             | 4              | 3                | 26                | 20              |
| 259009          | Olfr394        | 4             | 11              | 23               | 52             | 5              | 8                | 18                | 59              |
| 259010          | Olfr393        | 4             | 2               | 24               | 18             | 4              | 4                | 21                | 14              |
| 259011          | Olfr389        | 5             | 4               | 20               | 17             | 5              | 4                | 22                | 18              |
| 259012          | Olfr1052       | 4             | 2               | 20               | 16             | 4              | 3                | 19                | 22              |
| 259013          | Olfr1044       | 4             | 10              | 24               | 23             | 5              | 12               | 21                | 24              |
| 259014          | Olfr1047       | 4             | 5               | 23               | 27             | 3              | 6                | 18                | 41              |
| 259015          | Olfr1038       | 4             | 5               | 28               | 35             | 4              | 4                | 24                | 20              |
| 259016          | Olfr1048       | 4             | 67              | 22               | 16             | 5              | 94               | 21                | 17              |
| 259017          | Olfr1019       | 4             | 12              | 28               | 19             | 4              | 15               | 32                | 23              |
| 259018          | Olfr1049       | 4             | 3               | 22               | 19             | 4              | 4                | 21                | 18              |
| 259019          | Olfr1045       | 4             | 3               | 22               | 16             | 4              | 3                | 19                | 18              |
| 259020          | Olfr1056       | 5             | 26              | 33               | 20             | 5              | 37               | 37                | 20              |
| 259021          | Olfr1054       | 5             | 13              | 24               | 12             | 5              | 12               | 25                | 13              |

| NCBI<br>Gene ID | Gene<br>Symbol | Affy.<br>CD4+ | Agilent<br>CD4+ | Illumina<br>CD4+ | Nimbl.<br>CD4+ | Affy.<br>CD19+ | Agilent<br>CD19+ | Illumina<br>CD19+ | Nimbl.<br>CD19+ |
|-----------------|----------------|---------------|-----------------|------------------|----------------|----------------|------------------|-------------------|-----------------|
| 259023          | Olfr1055       | 4             | 24              | 29               | 19             | 4              | 37               | 25                | 16              |
| 259024          | Olfr381        | 5             | 4               | 22               | 17             | 4              | 7                | 22                | 23              |
| 259025          | Olfr385        | 4             | 25              | 30               | 16             | 4              | 24               | 32                | 15              |
| 259026          | Olfr378        | 4             | 2               | 33               | 17             | 4              | 3                | 32                | 19              |
| 259027          | Olfr380        | 4             | 5               | 29               | 15             | 4              | 5                | 32                | 15              |
| 259030          | Olfr1125       | 4             | 3               | 21               | 14             | 4              | 3                | 21                | 20              |
| 259031          | Olfr1120       | 5             | 2               | 22               | 33             | 5              | 3                | 19                | 32              |
| 259032          | Olfr1134       | 3             | 53              | 19               | 16             | 4              | 49               | 21                | 19              |
| 259033          | Olfr1122       | 5             | 52              | 26               | 16             | 5              | 41               | 21                | 20              |
| 259034          | Olfr705        | 5             | 11              | 24               | 23             | 5              | 8                | 22                | 27              |
| 259035          | Olfr714        | 7             | 2               | 22               | 25             | 5              | 3                | 23                | 34              |
| 259036          | Olfr713        | 9             | 14              | 52               | 16             | 8              | 17               | 45                | 14              |
| 259037          | Olfr711        | 5             | 11              | 20               | 15             | 5              | 12               | 22                | 22              |
| 259038          | Olfr283        | 5             | 23              | 22               | 15             | 5              | 33               | 26                | 15              |
| 259039          | Olfr1413       | 8             | 15              | 24               | 43             | 7              | 16               | 24                | 49              |
| 259040          | Olfr1416       | 5             | 2               | 17               | 49             | 5              | 3                | 19                | 29              |
| 259041          | Olfr1414       | 5             | 6               | 21               | 20             | 6              | 5                | 21                | 17              |
| 259042          | Olfr1351       | 5             | 2               | 30               | 19             | 5              | 3                | 29                | 17              |
| 259044          | Olfr1353       | 4             | 2               | 18               | 16             | 4              | 3                | 24                | 18              |
| 259045          | Olfr669        | 5             | 8               | 29               | 20             | 5              | 4                | 35                | 22              |
| 259046          | Olfr679        | 5             | 3               | 26               | 17             | 5              | 6                | 27                | 15              |
| 259047          | Olfr683        | 5             | 2               | 22               | 15             | 5              | 3                | 25                | 19              |
| 259048          | Olfr600        | 5             | 3               | 35               | 36             | 4              | 3                | 33                | 26              |
| 259049          | Olfr618        | 5             | 13              | 35               | 17             | 5              | 13               | 28                | 17              |
| 259050          | Olfr652        | 6             | 7               | 17               | 17             | 6              | 4                | 19                | 16              |
| 259051          | Olfr658        | 9             | 6               | 32               | 19             | 9              | 6                | 27                | 20              |
| 259052          | Olfr659        | 5             | 5               | 33               | 14             | 5              | 5                | 34                | 14              |
| 259053          | Olfr362        | 6             | 21              | 20               | 32             | 7              | 21               | 22                | 21              |
| 259054          | Olfr589        | 5             | 3               | 26               | 20             | 5              | 3                | 26                | 20              |
| 259056          | Olfr584        | 5             | 28              | 19               | 25             | 6              | 29               | 21                | 46              |
| 259057          | Olfr649        | 4             | 57              | 18               | 61             | 4              | 46               | 24                | 33              |
| 259058          | Olfr646        | 6             | 6               | 23               | 23             | 6              | 7                | 21                | 35              |
| 259061          | Olfr668        | 5             | 38              | 28               | 18             | 5              | 51               | 27                | 17              |
| 259062          | Olfr667        | 7             | 7               | 30               | 20             | 7              | 7                | 29                | 18              |
| 259063          | Olfr691        | 6             | 33              | 28               | 20             | 7              | 33               | 22                | 23              |
| 259064          | Olfr124        | 5             | 33              | 25               | 23             | 5              | 24               | 25                | 21              |
| 259066          | Olfr520        | 6             | 4               | 21               | 25             | 6              | 9                | 18                | 27              |
| 259067          | Olfr449        | 6             | 19              | 16               | 22             | 6              | 15               | 23                | 34              |
| 259069          | Olfr1389       | 7             | 2               | 26               | 18             | 7              | 3                | 28                | 24              |
| 259070          | Olfr829        | 4             | 3               | 22               | 13             | 4              | 3                | 25                | 16              |
| 259071          | Olfr166        | 7             | 78              | 20               | 47             | 8              | 65               | 24                | 50              |
| 259072          | Olfr686        | 7             | 22              | 25               | 19             | 8              | 28               | 24                | 22              |
| 259073          | Olfr604        | 5             | 24              | 23               | 46             | 4              | 25               | 21                | 53              |
| 259074          | Olfr1352       | 5             | 4               | 43               | 17             | 5              | 4                | 44                | 19              |
| 259075          | Olfr641        | 5             | 6               | 24               | 33             | 5              | 7                | 23                | 35              |
| 259078          | Olfr656        | 5             | 106             | 33               | 39             | 5              | 98               | 28                | 48              |
| 259080          | Olfr619        | 4             | 2               | 45               | 16             | 4              | 3                | 42                | 19              |
| 259081          | Olfr643        | 5             | 11              | 24               | 17             | 4              | 12               | 28                | 17              |
| 259083          | Olfr547        | 5             | 2               | 21               | 25             | 5              | 3                | 21                | 29              |
| 259084          | Olfr615        | 5             | 34              | 23               | 27             | 5              | 25               | 26                | 28              |
| 259085          | Olfr610        | 7             | 16              | 40               | 17             | 8              | 10               | 39                | 18              |

| NCBI Gene ID | Gene Symbol | Affy. CD4+ | Agilent CD4+ | Illumina CD4+ | Nimbl. CD4+ | Affy. CD19+ | Agilent CD19+ | Illumina CD19+ | Nimbl. CD19+ |
|--------------|-------------|------------|--------------|---------------|-------------|-------------|---------------|----------------|--------------|
| 259086       | Olfr609     | 7          | 48           | 28            | 18          | 8           | 36            | 25             | 13           |
| 259087       | Olfr622     | 5          | 29           | 28            | 15          | 4           | 20            | 26             | 18           |
| 259088       | Olfr639     | 5          | 3            | 20            | 24          | 5           | 3             | 23             | 28           |
| 259089       | Olfr571     | 7          | 731          | 31            | 20          | 7           | 714           | 30             | 18           |
| 259092       | Olfr569     | 7          | 46           | 25            | 34          | 6           | 46            | 24             | 21           |
| 259093       | Olfr572     | 4          | 16           | 24            | 29          | 5           | 13            | 22             | 41           |
| 259095       | Olfr568     | 5          | 4            | 29            | 23          | 5           | 4             | 30             | 29           |
| 259096       | Olfr561     | 5          | 2            | 29            | 13          | 5           | 3             | 29             | 27           |
| 259097       | Olfr558     | 6          | 30           | 24            | 21          | 7           | 14            | 28             | 24           |
| 259098       | Olfr606     | 5          | 8            | 24            | 32          | 5           | 11            | 29             | 41           |
| 259099       | Olfr676     | 4          | 22           | 27            | 20          | 4           | 23            | 26             | 26           |
| 259102       | Olfr630     | 5          | 13           | 26            | 17          | 4           | 13            | 25             | 13           |
| 259103       | Olfr616     | 4          | 5            | 20            | 36          | 4           | 6             | 17             | 46           |
| 259105       | Olfr549     | 8          | 119          | 18            | 35          | 8           | 110           | 16             | 34           |
| 259106       | Olfr552     | 5          | 2            | 27            | 19          | 5           | 3             | 26             | 21           |
| 259107       | Olfr555     | 8          | 21           | 22            | 20          | 9           | 24            | 25             | 18           |
| 259108       | Olfr550     | 10         | 7            | 24            | 21          | 11          | 9             | 21             | 18           |
| 259109       | Olfr978     | 6          | 38           | 21            | 20          | 6           | 46            | 19             | 23           |
| 259110       | Olfr980     | 5          | 9            | 24            | 19          | 5           | 10            | 24             | 27           |
| 259111       | Olfr974     | 6          | 20           | 19            | 18          | 6           | 24            | 22             | 22           |
| 259112       | Olfr979     | 5          | 12           | 28            | 55          | 5           | 17            | 24             | 47           |
| 259113       | Olfr577     | 6          | 61           | 26            | 57          | 6           | 55            | 28             | 76           |
| 259114       | Olfr570     | 5          | 115          | 22            | 23          | 5           | 172           | 22             | 19           |
| 259115       | Olfr586     | 8          | 10           | 37            | 34          | 8           | 6             | 29             | 25           |
| 259116       | Olfr559     | 4          | 65           | 35            | 27          | 4           | 54            | 34             | 34           |
| 259118       | Olfr575     | 5          | 3            | 46            | 20          | 4           | 3             | 47             | 19           |
| 259119       | Olfr578     | 4          | 19           | 21            | 31          | 4           | 19            | 20             | 26           |
| 259122       | Olfr635     | 7          | 84           | 27            | 17          | 6           | 74            | 27             | 18           |
| 259123       | Olfr632     | 10         | 3            | 39            | 48          | 10          | 5             | 39             | 31           |
| 259124       | Olfr638     | 7          | 9            | 20            | 16          | 6           | 14            | 20             | 16           |
| 259125       | Olfr644     | 6          | 4            | 25            | 25          | 5           | 7             | 28             | 29           |
| 259126       | Olfr623     | 4          | 7            | 20            | 28          | 4           | 6             | 21             | 36           |
| 259144       | Olfr456     | 9          | 20           | 42            | 71          | 10          | 16            | 41             | 42           |
| 259159       | Olfr628     | 4          | 2            | 19            | 33          | 4           | 3             | 23             | 34           |
| 259162       | Olfr427     | 6          | 7            | 32            | 39          | 5           | 12            | 31             | 39           |
| 259277       | Klk8        | 45         | 564          | 28            | 5443        | 20          | 16            | 24             | 104          |
| 259279       | Tubgcp3     | 137        | 690          | 38            | 1265        | 125         | 543           | 34             | 979          |
| 259300       | Ehd2        | 8          | 38           | 16            | 93          | 20          | 61            | 19             | 811          |
| 259301       | Leap2       | 11         | 3            | 21            | 52          | 9           | 3             | 17             | 86           |
| 260298       | Fev         | 36         | 84           | 25            | 57          | 34          | 69            | 28             | 67           |
| 260300       | Gm1549      | 9          | 2            | 30            | 32          | 10          | 3             | 27             | 46           |
| 260301       | Otos        | 7          | 47           | 22            | 98          | 8           | 37            | 26             | 51           |
| 260302       | Gga3        | 124        | 804          | 1177          | 86          | 140         | 723           | 1281           | 87           |
| 260305       | Nphp4       | 13         | 15           | 28            | 92          | 16          | 66            | 70             | 216          |
| 260409       | Cdc42ep3    | 36         | 224          | 319           | 11842       | 27          | 120           | 171            | 6831         |
| 263764       | Creg2       | 9          | 3            | 30            | 27          | 10          | 4             | 29             | 23           |
| 263803       | Pkn3        | 7          | 7            | 30            | 55          | 7           | 9             | 32             | 35           |
| 263876       | Spata2      | 27         | 161          | 32            | 304         | 28          | 146           | 33             | 211          |
| 264064       | Cdk8        | 143        | 99           | 207           | 844         | 144         | 74            | 201            | 388          |
| 266614       | Ly6g5b      | 14         | 295          | 89            | 487         | 17          | 291           | 43             | 283          |
| 266620       | Defb36      | 13         | 22           | 25            | 21          | 14          | 45            | 27             | 24           |

| NCBI Gene ID | Gene Symbol | Affy. CD4+ | Agilent CD4+ | Illumina CD4+ | Nimbl. CD4+ | Affy. CD19+ | Agilent CD19+ | Illumina CD19+ | Nimbl. CD19+ |
|--------------|-------------|------------|--------------|---------------|-------------|-------------|---------------|----------------|--------------|
| 266632       | Irak4       | 60         | 115          | 96            | 2978        | 69          | 155           | 92             | 3836         |
| 266645       | Acmsd       | 5          | 4            | 30            | 42          | 5           | 4             | 30             | 38           |
| 266692       | Rbm12       | 233        | 213          | 372           | 1642        | 228         | 161           | 348            | 1234         |
| 266744       | Gluld1      | 9          | 3            | 32            | 73          | 8           | 4             | 43             | 61           |
| 266781       | Snx17       | 118        | 2023         | 2057          | 1586        | 121         | 1888          | 2293           | 1251         |
| 266815       | Mill1       | 6          | 2            | 36            | 34          | 7           | 4             | 37             | 34           |
| 267019       | Rps15a      | 911        | 37366        | 134           | 26008       | 761         | 32163         | 128            | 22617        |
| 268281       | Shprh       | 117        | 38           | 27            | 699         | 108         | 34            | 25             | 618          |
| 268294       | Zbtb24      | 40         | 129          | 409           | 324         | 45          | 157           | 413            | 337          |
| 268297       | Scml4       | 360        | 943          | 607           | 3221        | 145         | 260           | 200            | 726          |
| 268354       | Ai851790    | 12         | 6            | 29            | 20          | 11          | 4             | 26             | 25           |
| 268373       | Ppia        | 1581       | 1897         | 13947         | 48535       | 1433        | 1296          | 11877          | 44822        |
| 268379       | Abca13      | 5          | 2            | 35            | 27          | 5           | 3             | 36             | 25           |
| 268395       | Mpg         | 24         | 449          | 56            | 672         | 27          | 562           | 62             | 861          |
| 268448       | Phf12       | 322        | 92           | 251           | 775         | 327         | 76            | 196            | 585          |
| 268449       | Rpl23a      | 1675       | 54077        | 6200          | 39120       | 1532        | 55619         | 5570           | 38044        |
| 268451       | Rab11fip4   | 61         | 16           | 495           | 330         | 21          | 3             | 49             | 37           |
| 268512       | Slc26a11    | 35         | 689          | 21            | 1797        | 37          | 513           | 20             | 1629         |
| 268527       | Greb1       | 6          | 3            | 38            | 25          | 7           | 3             | 40             | 18           |
| 268534       | Sntg2       | 7          | 3            | 41            | 16          | 7           | 4             | 43             | 22           |
| 268564       | Zbtb1       | 86         | 224          | 105           | 410         | 71          | 185           | 83             | 398          |
| 268566       | Gphn        | 53         | 73           | 82            | 122         | 70          | 83            | 115            | 197          |
| 268591       | Serpina5    | 5          | 2            | 28            | 25          | 6           | 3             | 29             | 29           |
| 268656       | Sptlc1      | 91         | 250          | 600           | 2806        | 97          | 250           | 586            | 2465         |
| 268697       | Ccnb1       | 11         | 6            | 38            | 145         | 14          | 15            | 58             | 400          |
| 268709       | Bc055107    | 7          | 6            | 25            | 18          | 7           | 5             | 24             | 27           |
| 268721       | 310021p13r  | 122        | 424          | 419           | 1280        | 122         | 336           | 325            | 1822         |
| 268739       | 130112l23r  | 12         | 3            | 28            | 114         | 11          | 19            | 27             | 128          |
| 268749       | Rnf31       | 149        | 849          | 290           | 490         | 151         | 763           | 240            | 373          |
| 268752       | Wdfy2       | 28         | 276          | 151           | 28          | 44          | 787           | 362            | 62           |
| 268756       | Gulo        | 6          | 28           | 25            | 39          | 7           | 20            | 25             | 49           |
| 268822       | Adck5       | 42         | 471          | 147           | 221         | 28          | 302           | 89             | 180          |
| 268859       | A2bp1       | 9          | 3            | 33            | 31          | 10          | 4             | 34             | 37           |
| 268860       | Abat        | 11         | 3            | 28            | 24          | 11          | 3             | 26             | 18           |
| 268880       | Ai480653    | 30         | 26           | 112           | 81          | 31          | 26            | 116            | 91           |
| 268882       | Fbxo45      | 69         | 20           | 26            | 2702        | 62          | 22            | 23             | 2358         |
| 268885       | Stfa2       | 5          | 3            | 29            | 122         | 5           | 3             | 29             | 194          |
| 268890       | Lsamp       | 8          | 9            | 35            | 38          | 8           | 3             | 37             | 34           |
| 268902       | Robo2       | 6          | 3            | 46            | 52          | 6           | 5             | 39             | 56           |
| 268903       | Nrip1       | 128        | 440          | 48            | 1705        | 40          | 130           | 30             | 419          |
| 268905       | Krtap13-1   | 5          | 17           | 45            | 26          | 5           | 12            | 43             | 25           |
| 268932       | Caskin1     | 16         | 5            | 22            | 113         | 16          | 3             | 24             | 179          |
| 268934       | Grm4        | 7          | 6            | 41            | 56          | 8           | 7             | 41             | 39           |
| 268977       | Ltbp1       | 9          | 28           | 68            | 67          | 9           | 26            | 48             | 48           |
| 268980       | Strn        | 99         | 227          | 88            | 41          | 86          | 178           | 77             | 39           |
| 268996       | Ss18        | 135        | 2777         | 813           | 3057        | 92          | 1615          | 536            | 2107         |
| 269016       | Sh3rf2      | 7          | 2            | 29            | 128         | 6           | 3             | 27             | 63           |
| 269019       | Stk32a      | 5          | 14           | 27            | 31          | 6           | 19            | 30             | 26           |
| 269023       | Zfp608      | 13         | 7            | 37            | 91          | 95          | 255           | 113            | 1421         |
| 269037       | Gm672       | 17         | 73           | 29            | 61          | 18          | 68            | 30             | 24           |
| 269053       | Gpr152      | 7          | 88           | 37            | 60          | 6           | 72            | 30             | 70           |

| NCBI Gene ID | Gene Symbol | Affy. CD4+ | Agilent CD4+ | Illumina CD4+ | Nimbl. CD4+ | Affy. CD19+ | Agilent CD19+ | Illumina CD19+ | Nimbl. CD19+ |
|--------------|-------------|------------|--------------|---------------|-------------|-------------|---------------|----------------|--------------|
| 269061       | 730453i16r  | 91         | 1470         | 66            | 391         | 130         | 1623          | 81             | 364          |
| 269063       | Ms4a5       | 4          | 15           | 29            | 25          | 4           | 14            | 32             | 38           |
| 269109       | Dpp10       | 5          | 33           | 24            | 18          | 4           | 26            | 21             | 21           |
| 269113       | Nup54       | 93         | 369          | 40            | 2532        | 98          | 393           | 44             | 2139         |
| 269116       | Nfasc       | 8          | 35           | 28            | 50          | 7           | 33            | 28             | 40           |
| 269120       | Optc        | 6          | 14           | 23            | 57          | 6           | 14            | 21             | 66           |
| 269132       | Glt25d2     | 5          | 2            | 21            | 19          | 5           | 3             | 26             | 26           |
| 269180       | Inpp4a      | 189        | 29           | 36            | 435         | 82          | 21            | 37             | 81           |
| 269181       | Mgat4a      | 32         | 27           | 30            | 161         | 56          | 63            | 60             | 563          |
| 269224       | Pask        | 11         | 16           | 34            | 33          | 11          | 39            | 32             | 43           |
| 269252       | Gtf3c4      | 41         | 56           | 80            | 189         | 42          | 71            | 79             | 193          |
| 269261       | Rpl12       | 3756       | 92980        | 9070          | 35832       | 2913        | 79054         | 7314           | 33323        |
| 269275       | Acvr1c      | 6          | 17           | 19            | 65          | 5           | 12            | 22             | 53           |
| 269295       | Rtn4rl2     | 39         | 54           | 23            | 40          | 35          | 57            | 26             | 39           |
| 269338       | Vps39       | 119        | 366          | 38            | 2243        | 130         | 396           | 33             | 1681         |
| 269344       | Ell3        | 8          | 2            | 26            | 40          | 38          | 1156          | 957            | 2857         |
| 269378       | Ahcy        | 103        | 367          | 221           | 1003        | 138         | 490           | 297            | 1251         |
| 269397       | Ss18l1      | 37         | 146          | 150           | 2527        | 38          | 127           | 129            | 1909         |
| 269424       | Phf17       | 74         | 442          | 645           | 1636        | 78          | 413           | 600            | 1409         |
| 269470       | Wdr3        | 102        | 800          | 97            | 1307        | 127         | 996           | 120            | 1099         |
| 269472       | Bc027582    | 10         | 195          | 23            | 286         | 9           | 75            | 27             | 125          |
| 269473       | Lrig2       | 61         | 369          | 30            | 275         | 89          | 543           | 30             | 348          |
| 269514       | Fbxl4       | 15         | 99           | 22            | 1526        | 20          | 171           | 27             | 2195         |
| 269523       | Vcp         | 243        | 2379         | 1926          | 12516       | 241         | 2667          | 1595           | 13690        |
| 269536       | Tex10       | 144        | 475          | 284           | 428         | 158         | 488           | 269            | 425          |
| 269582       | Clspn       | 5          | 2            | 35            | 84          | 7           | 4             | 63             | 237          |
| 269587       | Epb4.1      | 177        | 599          | 4137          | 865         | 123         | 235           | 2814           | 780          |
| 269589       | Syt1l       | 23         | 70           | 170           | 215         | 17          | 14            | 52             | 128          |
| 269593       | Luzp1       | 11         | 25           | 40            | 34          | 13          | 33            | 47             | 39           |
| 269610       | Chd5        | 15         | 16           | 31            | 48          | 14          | 14            | 30             | 44           |
| 269614       | Pank4       | 82         | 1474         | 1021          | 3246        | 88          | 1557          | 1040           | 3461         |
| 269639       | Zfp512      | 46         | 107          | 177           | 598         | 48          | 108           | 165            | 407          |
| 269682       | Golga3      | 78         | 238          | 359           | 573         | 69          | 197           | 270            | 472          |
| 269683       | l30006d01r  | 5          | 3            | 27            | 25          | 5           | 3             | 27             | 34           |
| 269700       | Au042671    | 349        | 704          | 1083          | 715         | 212         | 340           | 580            | 470          |
| 269702       | Mphosph9    | 40         | 79           | 33            | 2868        | 31          | 65            | 31             | 1754         |
| 269739       | Bc022713    | 4          | 2            | 26            | 18          | 5           | 3             | 26             | 18           |
| 269784       | Cntn4       | 5          | 17           | 31            | 55          | 5           | 16            | 27             | 34           |
| 269823       | Pon3        | 6          | 7            | 34            | 66          | 7           | 46            | 58             | 216          |
| 269881       | Map3k10     | 24         | 56           | 35            | 234         | 25          | 58            | 30             | 246          |
| 269951       | Idh2        | 103        | 162          | 598           | 1652        | 51          | 64            | 255            | 665          |
| 269952       | 330012f22r  | 18         | 32           | 31            | 407         | 18          | 29            | 29             | 345          |
| 269966       | Nup98       | 201        | 967          | 89            | 233         | 196         | 1399          | 98             | 334          |
| 270076       | Gcdh        | 36         | 387          | 29            | 650         | 45          | 356           | 31             | 580          |
| 270097       | Ai427515    | 6          | 8            | 25            | 28          | 6           | 12            | 28             | 18           |
| 270106       | Rpl13       | 1489       | 68918        | 17266         | 19225       | 1466        | 74238         | 17737          | 18888        |
| 270152       | Amica1      | 14         | 213          | 81            | 996         | 18          | 465           | 91             | 1603         |
| 270160       | Rab39       | 8          | 4            | 36            | 47          | 11          | 46            | 155            | 256          |
| 270166       | Clpx        | 65         | 272          | 595           | 874         | 59          | 300           | 568            | 641          |
| 270185       | Bc043934    | 56         | 102          | 45            | 208         | 14          | 14            | 27             | 40           |
| 270190       | Ephb1       | 8          | 9            | 32            | 89          | 7           | 5             | 29             | 113          |

| NCBI Gene ID | Gene Symbol | Affy. CD4+ | Agilent CD4+ | Illumina CD4+ | Nimbl. CD4+ | Affy. CD19+ | Agilent CD19+ | Illumina CD19+ | Nimbl. CD19+ |
|--------------|-------------|------------|--------------|---------------|-------------|-------------|---------------|----------------|--------------|
| 270192       | Rab6b       | 78         | 1006         | 500           | 805         | 19          | 173           | 85             | 124          |
| 270201       | Klhl18      | 60         | 184          | 40            | 30          | 67          | 212           | 44             | 50           |
| 270669       | Mbtps2      | 55         | 15           | 37            | 187         | 60          | 12            | 35             | 147          |
| 270757       | Bpil2       | 6          | 3            | 21            | 38          | 7           | 3             | 24             | 46           |
| 270802       | Bc048403    | 9          | 336          | 41            | 44          | 9           | 308           | 36             | 47           |
| 271005       | Klhdc1      | 75         | 93           | 214           | 2643        | 24          | 35            | 87             | 1013         |
| 271127       | Adamts16    | 8          | 5            | 28            | 27          | 7           | 3             | 26             | 37           |
| 271278       | Bc024139    | 10         | 18           | 26            | 91          | 10          | 19            | 29             | 95           |
| 271457       | Rab5a       | 210        | 552          | 25            | 5703        | 177         | 441           | 28             | 4516         |
| 271639       | Sacy        | 4          | 2            | 27            | 121         | 5           | 3             | 26             | 188          |
| 271786       | Galnt13     | 5          | 51           | 20            | 58          | 5           | 39            | 22             | 117          |
| 271981       | 530047e20r  | 103        | 24           | 27            | 78          | 112         | 31            | 28             | 46           |
| 272009       | Srrp        | 10         | 67           | 76            | 66          | 8           | 11            | 36             | 39           |
| 272027       | Bc057893    | 66         | 20           | 153           | 63          | 68          | 18            | 142            | 39           |
| 272031       | 130309f12r  | 8          | 7            | 34            | 83          | 7           | 4             | 33             | 78           |
| 272158       | Poln        | 11         | 4            | 23            | 62          | 11          | 3             | 29             | 60           |
| 272322       | Arntl2      | 6          | 3            | 44            | 52          | 6           | 3             | 39             | 61           |
| 272347       | Zfp398      | 67         | 22           | 117           | 280         | 68          | 21            | 116            | 205          |
| 272359       | Irf2bp1     | 64         | 143          | 368           | 149         | 65          | 158           | 264            | 196          |
| 272381       | Lrrc4b      | 35         | 2            | 27            | 26          | 35          | 3             | 31             | 27           |
| 272382       | Spib        | 9          | 7            | 28            | 393         | 511         | 3645          | 4263           | 8222         |
| 272428       | 730027j19r  | 7          | 2            | 36            | 38          | 8           | 3             | 37             | 43           |
| 272636       | D9ertd280e  | 14         | 20           | 33            | 29          | 12          | 19            | 30             | 31           |
| 272643       | Tessp3      | 7          | 5            | 33            | 50          | 8           | 4             | 31             | 65           |
| 276770       | Eif5a       | 190        | 1482         | 544           | 5465        | 209         | 1925          | 656            | 5714         |
| 276846       | Pigs        | 71         | 1581         | 68            | 637         | 78          | 1440          | 74             | 632          |
| 276865       | Olfr1371    | 6          | 6            | 61            | 24          | 6           | 9             | 55             | 30           |
| 276891       | Timd4       | 6          | 4            | 30            | 85          | 5           | 5             | 28             | 108          |
| 276905       | Armc7       | 91         | 689          | 578           | 762         | 28          | 97            | 113            | 139          |
| 276919       | Gemin4      | 40         | 103          | 369           | 296         | 39          | 97            | 368            | 320          |
| 276950       | Slnf8       | 157        | 46           | 414           | 772         | 120         | 31            | 287            | 279          |
| 276952       | Rasl10b     | 12         | 31           | 41            | 31          | 13          | 26            | 52             | 34           |
| 277250       | Jmjd1b      | 343        | 164          | 54            | 1126        | 496         | 244           | 60             | 2033         |
| 277353       | Tcfl5       | 7          | 2            | 27            | 34          | 6           | 3             | 28             | 39           |
| 277360       | Bc067047    | 190        | 617          | 336           | 7463        | 90          | 209           | 149            | 3299         |
| 277432       | Gm691       | 40         | 18           | 34            | 37          | 33          | 14            | 30             | 61           |
| 277562       | Olfr1286    | 4          | 2            | 21            | 22          | 5           | 3             | 22             | 20           |
| 277854       | Depdc5      | 65         | 91           | 45            | 374         | 105         | 155           | 58             | 774          |
| 277939       | Au020772    | 170        | 102          | 292           | 278         | 173         | 113           | 264            | 211          |
| 278180       | Vsig4       | 4          | 5            | 25            | 27          | 5           | 3             | 30             | 25           |
| 278507       | Wfikkn2     | 11         | 11           | 24            | 350         | 7           | 8             | 23             | 36           |
| 279028       | Adamts13    | 9          | 3            | 30            | 46          | 10          | 3             | 28             | 64           |
| 279029       | Gm711       | 6          | 4            | 34            | 21          | 6           | 3             | 31             | 25           |
| 280287       | Kiss1       | 14         | 12           | 34            | 114         | 13          | 11            | 26             | 122          |
| 280635       | Emilin3     | 14         | 15           | 23            | 35          | 16          | 30            | 26             | 29           |
| 280645       | B3gat2      | 12         | 3            | 27            | 118         | 10          | 3             | 25             | 56           |
| 280662       | Afm         | 4          | 2            | 23            | 39          | 5           | 4             | 21             | 54           |
| 280667       | Adam1b      | 6          | 8            | 23            | 38          | 6           | 21            | 21             | 59           |
| 280668       | Adam1a      | 27         | 64           | 51            | 1865        | 23          | 41            | 44             | 1532         |
| 282619       | Sbsn        | 14         | 192          | 180           | 178         | 13          | 106           | 89             | 231          |
| 282663       | Serpinb1b   | 4          | 2            | 26            | 21          | 4           | 10            | 23             | 37           |



| NCBI Gene ID | Gene Symbol | Affy. CD4+ | Agilent CD4+ | Illumina CD4+ | Nimbl. CD4+ | Affy. CD19+ | Agilent CD19+ | Illumina CD19+ | Nimbl. CD19+ |
|--------------|-------------|------------|--------------|---------------|-------------|-------------|---------------|----------------|--------------|
| 286940       | Flnb        | 91         | 263          | 410           | 280         | 45          | 95            | 183            | 92           |
| 304302       | Zfp469      | 78         | 140          | 41            | 262         | 102         | 89            | 37             | 402          |
| 317652       | Klk15       | 7          | 22           | 35            | 37          | 7           | 19            | 35             | 35           |
| 317653       | Klk14       | 10         | 9            | 21            | 26          | 9           | 8             | 27             | 33           |
| 317750       | Slc24a5     | 7          | 31           | 33            | 1892        | 7           | 45            | 30             | 2308         |
| 317755       | Zar1        | 17         | 9            | 27            | 64          | 11          | 5             | 23             | 62           |
| 319149       | Hist1h3d    | 14         | 7106         | 227           | 449         | 15          | 8857          | 265            | 939          |
| 319156       | Hist1h4d    | 85         | 1277         | 135           | 166         | 85          | 1060          | 146            | 283          |
| 319157       | Hist1h4f    | 29         | 1409         | 201           | 961         | 38          | 1442          | 241            | 1955         |
| 319158       | Hist1h4i    | 20         | 112          | 146           | 969         | 21          | 219           | 195            | 2610         |
| 319162       | Hist3h2a    | 107        | 800          | 36            | 914         | 116         | 896           | 40             | 1248         |
| 319163       | Hist1h2aa   | 27         | 6248         | 25            | 130         | 33          | 12620         | 26             | 195          |
| 319164       | Hist1h2ac   | 7          | 5            | 50            | 390         | 7           | 5             | 56             | 416          |
| 319166       | Hist1h2ae   | 4          | 4            | 56            | 848         | 4           | 9             | 101            | 3094         |
| 319169       | Hist1h2ak   | 54         | 350          | 524           | 2951        | 93          | 920           | 1622           | 5957         |
| 319172       | Hist1h2ab   | 5          | 12           | 28            | 276         | 6           | 29            | 32             | 721          |
| 319173       | Hist1h2af   | 443        | 6848         | 3736          | 13025       | 697         | 13395         | 6739           | 21328        |
| 319177       | Hist1h2ba   | 6          | 149          | 45            | 21          | 6           | 279           | 41             | 25           |
| 319186       | Hist1h2bm   | 56         | 231          | 121           | 242         | 64          | 430           | 234            | 498          |
| 319190       | Hist2h2be   | 10         | 117          | 101           | 452         | 10          | 104           | 114            | 277          |
| 319192       | Hist2h2aa2  | 909        | 4            | 3222          | 13919       | 1297        | 3             | 6293           | 21147        |
| 319195       | Rpl17       | 2429       | 41361        | 10764         | 40138       | 2219        | 26164         | 10402          | 38619        |
| 319196       | Ankrd5      | 6          | 23           | 35            | 20          | 6           | 19            | 28             | 25           |
| 319197       | Gpr4        | 5          | 13           | 24            | 27          | 5           | 15            | 25             | 30           |
| 319200       | Gpr82       | 4          | 9            | 19            | 19          | 4           | 15            | 24             | 19           |
| 319211       | Nol4        | 10         | 8            | 35            | 17          | 12          | 11            | 36             | 19           |
| 319229       | Sctr        | 9          | 3            | 31            | 40          | 7           | 3             | 26             | 39           |
| 319236       | 330105e10r  | 40         | 56           | 333           | 1675        | 61          | 74            | 333            | 2403         |
| 319262       | Fchsd1      | 20         | 307          | 293           | 60          | 22          | 309           | 244            | 69           |
| 319322       | Sf3b2       | 117        | 3050         | 2249          | 12660       | 127         | 3019          | 2312           | 10330        |
| 319387       | Lphn3       | 5          | 4            | 26            | 24          | 5           | 4             | 27             | 25           |
| 319430       | Gpr77       | 10         | 23           | 18            | 21          | 12          | 109           | 21             | 34           |
| 319446       | Dpep2       | 6          | 6            | 32            | 42          | 6           | 9             | 29             | 57           |
| 319468       | Ppm1h       | 187        | 78           | 79            | 1733        | 11          | 3             | 31             | 61           |
| 319478       | Cxxc4       | 8          | 2            | 31            | 30          | 8           | 3             | 28             | 22           |
| 319480       | Itga11      | 6          | 10           | 28            | 51          | 6           | 8             | 26             | 35           |
| 319486       | 330057m04   | 9          | 15           | 30            | 125         | 8           | 11            | 34             | 193          |
| 319508       | Syt15       | 10         | 5            | 41            | 91          | 10          | 9             | 40             | 91           |
| 319518       | 330402e16r  | 67         | 250          | 227           | 213         | 59          | 198           | 224            | 187          |
| 319520       | Dusp4       | 15         | 49           | 62            | 33          | 38          | 270           | 256            | 31           |
| 319554       | Idi1        | 71         | 256          | 44            | 4883        | 55          | 148           | 38             | 3282         |
| 319556       | 330041j22r  | 9          | 2            | 33            | 15          | 9           | 3             | 29             | 22           |
| 319574       | 330133o14r  | 13         | 13           | 86            | 1117        | 10          | 3             | 73             | 594          |
| 319579       | 330107o10r  | 9          | 2            | 25            | 24          | 7           | 3             | 28             | 23           |
| 319583       | Lig4        | 48         | 100          | 45            | 1647        | 41          | 110           | 43             | 1358         |
| 319594       | Hif1an      | 59         | 73           | 22            | 4846        | 61          | 114           | 23             | 4680         |
| 319609       | 330132a10r  | 5          | 2            | 22            | 30          | 5           | 3             | 22             | 21           |
| 319613       | 730410e15r  | 13         | 7            | 26            | 17          | 14          | 9             | 29             | 23           |
| 319615       | 330416l07r  | 27         | 84           | 359           | 1186        | 30          | 91            | 484            | 1803         |
| 319625       | Galm        | 16         | 31           | 52            | 496         | 9           | 14            | 35             | 71           |
| 319637       | 430072c10r  | 6          | 2            | 26            | 20          | 6           | 2             | 23             | 73           |

| NCBI Gene ID | Gene Symbol | Affy. CD4+ | Agilent CD4+ | Illumina CD4+ | Nimbl. CD4+ | Affy. CD19+ | Agilent CD19+ | Illumina CD19+ | Nimbl. CD19+ |
|--------------|-------------|------------|--------------|---------------|-------------|-------------|---------------|----------------|--------------|
| 319642       | Rab9b       | 8          | 8            | 21            | 19          | 9           | 12            | 20             | 22           |
| 319651       | Usp37       | 68         | 85           | 220           | 125         | 71          | 93            | 246            | 116          |
| 319655       | Podxl2      | 8          | 3            | 22            | 46          | 7           | 4             | 25             | 44           |
| 319665       | 430010j10r  | 5          | 8            | 37            | 41          | 5           | 14            | 40             | 61           |
| 319670       | Eml5        | 57         | 122          | 32            | 711         | 27          | 43            | 26             | 213          |
| 319719       | 732471d19r  | 51         | 50           | 93            | 552         | 45          | 39            | 80             | 441          |
| 319738       | '30020m07   | 9          | 2            | 19            | 17          | 7           | 5             | 21             | 15           |
| 319740       | Zfyve27     | 94         | 507          | 112           | 375         | 91          | 436           | 116            | 291          |
| 319757       | Smo         | 24         | 84           | 37            | 107         | 21          | 8             | 24             | 44           |
| 319772       | l30050o18r  | 16         | 19           | 23            | 278         | 18          | 29            | 19             | 293          |
| 319800       | 730048c13r  | 4          | 23           | 31            | 25          | 4           | 24            | 29             | 43           |
| 319803       | 430090l17r  | 10         | 68           | 100           | 98          | 8           | 34            | 72             | 82           |
| 319819       | 332435o22r  | 7          | 11           | 25            | 28          | 8           | 11            | 24             | 32           |
| 319822       | Smyd4       | 24         | 58           | 94            | 112         | 25          | 74            | 89             | 101          |
| 319829       | 330154k18r  | 11         | 9            | 30            | 20          | 9           | 11            | 27             | 16           |
| 319832       | 332401o19r  | 8          | 6            | 32            | 48          | 7           | 6             | 30             | 39           |
| 319876       | Cobll1      | 27         | 9            | 26            | 37          | 186         | 183           | 261            | 399          |
| 319885       | Zcchc7      | 137        | 822          | 494           | 2197        | 177         | 1076          | 595            | 2990         |
| 319924       | Apba1       | 6          | 15           | 23            | 134         | 8           | 14            | 27             | 177          |
| 319944       | Taf2        | 102        | 9            | 23            | 836         | 116         | 11            | 23             | 752          |
| 319945       | Lenep       | 32         | 165          | 33            | 26          | 38          | 206           | 34             | 22           |
| 319953       | Ttll1       | 19         | 33           | 48            | 372         | 20          | 53            | 60             | 374          |
| 319955       | Erc6        | 98         | 59           | 35            | 223         | 105         | 71            | 39             | 167          |
| 319984       | Jph4        | 11         | 168          | 31            | 94          | 12          | 193           | 24             | 98           |
| 320011       | Ugcgl1      | 180        | 114          | 593           | 1383        | 153         | 74            | 560            | 847          |
| 320040       | 330039a11r  | 10         | 4            | 23            | 20          | 11          | 4             | 24             | 16           |
| 320063       | 230354k17r  | 9          | 63           | 28            | 423         | 9           | 50            | 29             | 331          |
| 320078       | Olfml2b     | 8          | 12           | 27            | 47          | 7           | 10            | 30             | 53           |
| 320082       | 330009p21r  | 5          | 34           | 26            | 47          | 5           | 50            | 25             | 37           |
| 320091       | Tmem16d     | 5          | 4            | 35            | 85          | 4           | 5             | 33             | 64           |
| 320106       | 330158f14r  | 5          | 2            | 44            | 79          | 5           | 6             | 43             | 107          |
| 320118       | Fbxl13      | 4          | 3            | 24            | 22          | 4           | 3             | 23             | 18           |
| 320119       | Rps6kc1     | 18         | 87           | 22            | 68          | 18          | 77            | 27             | 51           |
| 320129       | Adrbk2      | 7          | 39           | 28            | 42          | 8           | 42            | 33             | 254          |
| 320139       | Ptpn7       | 113        | 1093         | 175           | 10049       | 56          | 381           | 87             | 5136         |
| 320145       | Sp8         | 7          | 2            | 39            | 66          | 7           | 3             | 37             | 76           |
| 320159       | 332412n22r  | 7          | 35           | 27            | 92          | 8           | 40            | 31             | 115          |
| 320191       | Hook3       | 66         | 243          | 76            | 141         | 85          | 256           | 85             | 150          |
| 320209       | Ddx11       | 65         | 43           | 446           | 1251        | 47          | 23            | 290            | 781          |
| 320213       | Senp5       | 77         | 35           | 31            | 867         | 77          | 41            | 31             | 660          |
| 320237       | 330419j24r  | 10         | 97           | 33            | 37          | 8           | 73            | 23             | 16           |
| 320265       | 330007b19r  | 5          | 3            | 34            | 16          | 5           | 3             | 36             | 14           |
| 320267       | Fubp3       | 76         | 242          | 487           | 771         | 54          | 174           | 398            | 572          |
| 320271       | 930041i02r  | 107        | 53           | 36            | 1507        | 134         | 44            | 49             | 1635         |
| 320277       | 230086a09r  | 9          | 8            | 20            | 89          | 6           | 3             | 20             | 26           |
| 320292       | Rasgef1b    | 6          | 13           | 161           | 592         | 113         | 1939          | 300            | 27428        |
| 320305       | 330009g21r  | 65         | 6            | 19            | 655         | 200         | 7             | 17             | 1614         |
| 320332       | Hist4h4     | 40         | 215          | 60            | 306         | 40          | 230           | 53             | 276          |
| 320333       | 330030k20r  | 5          | 3            | 22            | 37          | 5           | 3             | 19             | 20           |
| 320351       | 230037d09r  | 10         | 309          | 171           | 4389        | 13          | 371           | 156            | 3792         |
| 320376       | Bcorl1      | 34         | 263          | 64            | 130         | 20          | 202           | 40             | 82           |

| NCBI Gene ID | Gene Symbol | Affy. CD4+ | Agilent CD4+ | Illumina CD4+ | Nimbl. CD4+ | Affy. CD19+ | Agilent CD19+ | Illumina CD19+ | Nimbl. CD19+ |
|--------------|-------------|------------|--------------|---------------|-------------|-------------|---------------|----------------|--------------|
| 320377       | 330175e14r  | 28         | 44           | 33            | 1563        | 17          | 22            | 27             | 773          |
| 320379       | 530028g08r  | 5          | 3            | 24            | 22          | 4           | 3             | 24             | 31           |
| 320398       | Lrig3       | 6          | 18           | 43            | 98          | 6           | 13            | 41             | 79           |
| 320405       | Cadps2      | 5          | 5            | 27            | 66          | 5           | 5             | 29             | 80           |
| 320411       | 730089k16r  | 7          | 3            | 33            | 19          | 8           | 3             | 29             | 19           |
| 320438       | Alg6        | 9          | 14           | 110           | 97          | 11          | 22            | 246            | 173          |
| 320452       | P4ha3       | 6          | 2            | 29            | 36          | 5           | 5             | 32             | 32           |
| 320454       | 330032o22r  | 5          | 3            | 22            | 27          | 5           | 3             | 19             | 24           |
| 320456       | 330016d10r  | 10         | 4            | 18            | 292         | 9           | 6             | 19             | 384          |
| 320463       | 530111l10r  | 8          | 2            | 24            | 24          | 8           | 3             | 27             | 20           |
| 320472       | Ppm1e       | 9          | 3            | 29            | 28          | 23          | 81            | 131            | 287          |
| 320484       | 430107d22r  | 653        | 3916         | 5652          | 7816        | 284         | 1432          | 2303           | 4020         |
| 320502       | Lmod3       | 5          | 51           | 29            | 52          | 5           | 51            | 26             | 29           |
| 320528       | Vps13c      | 126        | 84           | 29            | 392         | 59          | 45            | 26             | 138          |
| 320541       | 530082c11r  | 102        | 418          | 436           | 3263        | 82          | 221           | 274            | 2376         |
| 320549       | D5ertd577e  | 5          | 46           | 26            | 26          | 5           | 69            | 25             | 45           |
| 320551       | 430209f14r  | 6          | 2            | 19            | 36          | 6           | 2             | 18             | 30           |
| 320560       | 330011o10r  | 7          | 5            | 22            | 140         | 140         | 179           | 159            | 458          |
| 320571       | 430417m19r  | 5          | 75           | 24            | 16          | 5           | 69            | 26             | 17           |
| 320595       | Phf8        | 95         | 801          | 62            | 75          | 94          | 715           | 65             | 44           |
| 320609       | 330017j20r  | 6          | 4            | 20            | 21          | 6           | 8             | 23             | 26           |
| 320632       | Ascc3l1     | 221        | 2014         | 512           | 899         | 239         | 1808          | 507            | 943          |
| 320655       | Perld1      | 11         | 176          | 46            | 57          | 12          | 174           | 49             | 54           |
| 320662       | Casc1       | 8          | 22           | 45            | 185         | 9           | 19            | 35             | 303          |
| 320664       | 730031o20r  | 10         | 22           | 47            | 29          | 11          | 24            | 49             | 25           |
| 320683       | Zfp629      | 12         | 6            | 44            | 154         | 10          | 5             | 51             | 157          |
| 320685       | Dctd        | 24         | 17           | 106           | 365         | 22          | 15            | 93             | 203          |
| 320701       | 130034i18r  | 6          | 2            | 26            | 18          | 6           | 3             | 30             | 21           |
| 320707       | Atp2b3      | 8          | 15           | 25            | 72          | 8           | 12            | 25             | 41           |
| 320714       | 330016e14r  | 132        | 210          | 31            | 364         | 136         | 178           | 34             | 370          |
| 320718       | Slc26a9     | 6          | 6            | 45            | 17          | 7           | 5             | 47             | 36           |
| 320727       | lpo8        | 127        | 1070         | 375           | 1167        | 119         | 792           | 344            | 734          |
| 320769       | Prdx6-rs1   | 5          | 184          | 33            | 29          | 5           | 70            | 29             | 30           |
| 320790       | Chd7        | 552        | 2583         | 1166          | 2235        | 387         | 1690          | 899            | 1984         |
| 320795       | Pkn1        | 297        | 366          | 317           | 326         | 272         | 375           | 342            | 265          |
| 320799       | Zhx3        | 28         | 153          | 338           | 97          | 16          | 42            | 65             | 29           |
| 320802       | 330512m04r  | 16         | 18           | 37            | 265         | 13          | 3             | 39             | 77           |
| 320808       | Wdr22       | 182        | 176          | 240           | 102         | 135         | 145           | 240            | 75           |
| 320816       | Ankrd16     | 76         | 230          | 20            | 1551        | 83          | 200           | 17             | 1024         |
| 320840       | Negr1       | 9          | 24           | 27            | 29          | 9           | 22            | 25             | 27           |
| 320844       | Amigo3      | 28         | 24           | 54            | 77          | 30          | 32            | 46             | 49           |
| 320845       | 230056p14r  | 5          | 2            | 28            | 29          | 5           | 3             | 30             | 28           |
| 320869       | 32415m23r   | 12         | 9            | 24            | 99          | 12          | 6             | 32             | 53           |
| 320874       | 330030d11r  | 6          | 9            | 23            | 20          | 5           | 7             | 21             | 18           |
| 320910       | Itgb8       | 8          | 8            | 30            | 61          | 6           | 5             | 19             | 15           |
| 320938       | Tnpo3       | 253        | 658          | 473           | 4792        | 245         | 668           | 482            | 5807         |
| 320940       | Atp11c      | 134        | 38           | 29            | 2151        | 154         | 27            | 27             | 1722         |
| 320974       | 430119l13r  | 11         | 3            | 21            | 17          | 11          | 3             | 22             | 20           |
| 320981       | Enpp6       | 5          | 4            | 25            | 23          | 5           | 4             | 36             | 35           |
| 320995       | Rfxdc1      | 5          | 2            | 22            | 15          | 6           | 3             | 22             | 19           |
| 321000       | 333421e11r  | 39         | 185          | 54            | 3232        | 38          | 140           | 49             | 2513         |

| NCBI Gene ID | Gene Symbol | Affy. CD4+ | Agilent CD4+ | Illumina CD4+ | Nimbl. CD4+ | Affy. CD19+ | Agilent CD19+ | Illumina CD19+ | Nimbl. CD19+ |
|--------------|-------------|------------|--------------|---------------|-------------|-------------|---------------|----------------|--------------|
| 321007       | Serac1      | 20         | 24           | 38            | 208         | 18          | 26            | 40             | 185          |
| 321008       | 330408a02r  | 20         | 9            | 37            | 131         | 20          | 15            | 35             | 102          |
| 321019       | Ebi2        | 277        | 1371         | 1432          | 2673        | 245         | 1299          | 1250           | 2382         |
| 321020       | Fpr-rs6     | 4          | 3            | 34            | 14          | 3           | 3             | 36             | 26           |
| 321022       | Cdv3        | 288        | 307          | 1238          | 4215        | 339         | 387           | 1512           | 5102         |
| 326618       | Tpm4        | 395        | 1964         | 2292          | 8449        | 527         | 3295          | 3234           | 9538         |
| 326622       | Upf2        | 123        | 501          | 1874          | 367         | 137         | 504           | 1974           | 367          |
| 326623       | Tnfsf15     | 12         | 18           | 21            | 19          | 10          | 16            | 19             | 15           |
| 327762       | Dna2l       | 9          | 6            | 30            | 69          | 10          | 22            | 30             | 75           |
| 327766       | Tmem26      | 11         | 6            | 22            | 28          | 35          | 23            | 21             | 305          |
| 327824       | 330438d12r  | 13         | 71           | 107           | 263         | 10          | 110           | 132            | 418          |
| 327826       | Frs2        | 47         | 449          | 296           | 473         | 37          | 320           | 275            | 400          |
| 327942       | Pigl        | 43         | 12           | 208           | 388         | 35          | 6             | 131            | 428          |
| 327959       | Fbxo39      | 45         | 230          | 58            | 4601        | 33          | 141           | 52             | 2806         |
| 327963       | 700012c15r  | 4          | 2            | 20            | 18          | 4           | 3             | 18             | 17           |
| 327978       | Slfn5       | 164        | 40           | 34            | 399         | 45          | 9             | 32             | 58           |
| 328110       | Prpf39      | 91         | 596          | 172           | 15629       | 85          | 760           | 149            | 14715        |
| 328274       | Zfp455      | 9          | 78           | 21            | 115         | 9           | 97            | 24             | 199          |
| 328370       | Rft1        | 43         | 3            | 126           | 956         | 55          | 5             | 162            | 1045         |
| 328381       | Sh2d4b      | 11         | 2            | 32            | 328         | 10          | 3             | 28             | 318          |
| 328401       | Rnase9      | 4          | 4            | 20            | 42          | 5           | 3             | 22             | 24           |
| 328417       | 330548g07r  | 138        | 102          | 19            | 353         | 128         | 105           | 22             | 384          |
| 328440       | Npm2        | 6          | 16           | 65            | 54          | 6           | 8             | 29             | 86           |
| 328572       | Ep300       | 238        | 43           | 43            | 1296        | 313         | 46            | 65             | 1196         |
| 328780       | Prss34      | 8          | 26           | 22            | 35          | 8           | 23            | 21             | 30           |
| 328795       | Ubash3a     | 181        | 275          | 262           | 3371        | 10          | 11            | 26             | 42           |
| 328918       | 230097i24r  | 15         | 24           | 26            | 73          | 13          | 22            | 27             | 48           |
| 328949       | Mcc         | 11         | 6            | 42            | 710         | 11          | 5             | 48             | 762          |
| 328977       | Zfp532      | 6          | 8            | 25            | 30          | 6           | 6             | 28             | 43           |
| 329065       | Scd4        | 8          | 5            | 40            | 60          | 7           | 3             | 39             | 64           |
| 329165       | Abi2        | 21         | 126          | 32            | 393         | 12          | 60            | 24             | 86           |
| 329244       | Il19        | 8          | 4            | 24            | 66          | 8           | 5             | 21             | 113          |
| 329252       | Lgr6        | 8          | 14           | 27            | 34          | 8           | 10            | 29             | 33           |
| 329278       | Tnn         | 9          | 2            | 21            | 54          | 8           | 3             | 21             | 52           |
| 329324       | Syt14       | 6          | 3            | 26            | 27          | 6           | 4             | 25             | 38           |
| 329470       | 510203e10r  | 27         | 320          | 303           | 787         | 21          | 191           | 176            | 499          |
| 329480       | Ai314831    | 8          | 2            | 39            | 31          | 8           | 3             | 38             | 28           |
| 329693       | Fcr15       | 7          | 2            | 33            | 25          | 100         | 33            | 134            | 1585         |
| 329731       | 330404m11r  | 28         | 73           | 26            | 31          | 26          | 16            | 23             | 31           |
| 329777       | Pigk        | 43         | 23           | 39            | 127         | 49          | 28            | 38             | 98           |
| 329828       | Ai464131    | 7          | 13           | 35            | 20          | 6           | 10            | 33             | 17           |
| 329908       | Usp24       | 136        | 235          | 1118          | 1582        | 115         | 228           | 976            | 1428         |
| 329918       | 330013n09r  | 3          | 3            | 28            | 18          | 4           | 3             | 30             | 19           |
| 329934       | Foxo6       | 11         | 2            | 17            | 138         | 12          | 3             | 24             | 154          |
| 329941       | Col8a2      | 13         | 2            | 27            | 68          | 11          | 3             | 22             | 73           |
| 329954       | Catsper4    | 7          | 3            | 29            | 29          | 7           | 3             | 30             | 33           |
| 330064       | Slc5a6      | 23         | 135          | 311           | 1914        | 25          | 126           | 268            | 1704         |
| 330171       | Kctd10      | 65         | 196          | 1378          | 2028        | 53          | 113           | 939            | 1182         |
| 330222       | Sdk1        | 9          | 2            | 25            | 68          | 9           | 3             | 27             | 85           |
| 330260       | Pon2        | 92         | 56           | 1025          | 2833        | 93          | 56            | 1122           | 2688         |
| 330277       | Bc048651    | 8          | 18           | 22            | 59          | 8           | 23            | 24             | 96           |

| NCBI Gene ID | Gene Symbol | Affy. CD4+ | Agilent CD4+ | Illumina CD4+ | Nimbl. CD4+ | Affy. CD19+ | Agilent CD19+ | Illumina CD19+ | Nimbl. CD19+ |
|--------------|-------------|------------|--------------|---------------|-------------|-------------|---------------|----------------|--------------|
| 330361       | Aw146020    | 25         | 70           | 82            | 1311        | 24          | 74            | 84             | 1160         |
| 330379       | Gm839       | 5          | 8            | 19            | 22          | 5           | 6             | 18             | 19           |
| 330450       | Mlstd1      | 7          | 3            | 22            | 555         | 7           | 4             | 30             | 581          |
| 330463       | Zfp78       | 8          | 25           | 95            | 151         | 8           | 25            | 83             | 105          |
| 330577       | 700129i04r  | 6          | 3            | 28            | 33          | 6           | 4             | 37             | 24           |
| 330662       | Dock1       | 5          | 6            | 25            | 16          | 5           | 5             | 30             | 16           |
| 330776       | 510021k21r  | 4          | 3            | 29            | 45          | 4           | 3             | 30             | 26           |
| 330790       | Hapln4      | 8          | 9            | 19            | 98          | 8           | 14            | 18             | 146          |
| 330812       | Rnf150      | 10         | 2            | 26            | 42          | 10          | 3             | 25             | 27           |
| 330814       | Lphn1       | 155        | 2852         | 122           | 124         | 31          | 413           | 32             | 193          |
| 330817       | Dhps        | 68         | 517          | 255           | 1082        | 76          | 578           | 233            | 1177         |
| 330836       | Slc7a6      | 127        | 78           | 158           | 1474        | 111         | 70            | 122            | 1166         |
| 330914       | Grit        | 5          | 9            | 44            | 30          | 6           | 8             | 47             | 31           |
| 330938       | Dixdc1      | 7          | 3            | 24            | 31          | 7           | 5             | 21             | 43           |
| 330941       | Ai593442    | 5          | 4            | 38            | 52          | 5           | 3             | 41             | 63           |
| 330953       | Hcn4        | 9          | 70           | 20            | 48          | 10          | 79            | 26             | 36           |
| 330959       | Snpc5       | 43         | 560          | 46            | 496         | 46          | 477           | 42             | 578          |
| 330962       | Ostb        | 8          | 9            | 20            | 33          | 7           | 8             | 22             | 27           |
| 331004       | Slc9a9      | 165        | 50           | 46            | 957         | 20          | 4             | 23             | 50           |
| 331026       | Gmppb       | 24         | 213          | 42            | 809         | 27          | 313           | 50             | 1128         |
| 331046       | Tgm4        | 8          | 38           | 42            | 365         | 7           | 15            | 31             | 181          |
| 331063       | Ai987692    | 6          | 4            | 27            | 25          | 6           | 5             | 30             | 26           |
| 331524       | Xkrx        | 38         | 2            | 219           | 30          | 64          | 3             | 312            | 31           |
| 331535       | Serpina7    | 4          | 3            | 30            | 30          | 4           | 5             | 33             | 65           |
| 331623       | Ak122525    | 25         | 200          | 32            | 2920        | 23          | 205           | 31             | 2911         |
| 332359       | Tigd3       | 13         | 8            | 31            | 29          | 11          | 4             | 33             | 22           |
| 332397       | Nanos1      | 19         | 38           | 48            | 718         | 16          | 27            | 43             | 675          |
| 332937       | Tcfap2e     | 13         | 778          | 28            | 21          | 13          | 698           | 31             | 18           |
| 333654       | Ppp1r13l    | 11         | 139          | 49            | 78          | 11          | 70            | 46             | 81           |
| 333715       | H2-m10.2    | 10         | 13           | 25            | 35          | 9           | 18            | 27             | 29           |
| 333789       | B3bp        | 94         | 316          | 1237          | 833         | 155         | 509           | 2278           | 1224         |
| 333883       | Cd59b       | 5          | 4            | 17            | 27          | 5           | 5             | 23             | 24           |
| 337924       | Cyp3a44     | 5          | 3            | 21            | 17          | 5           | 3             | 25             | 26           |
| 338320       | Mia2        | 5          | 2            | 26            | 20          | 4           | 3             | 27             | 24           |
| 338337       | Cog3        | 107        | 366          | 344           | 160         | 93          | 329           | 339            | 118          |
| 338346       | Gpr21       | 19         | 27           | 29            | 36          | 12          | 26            | 32             | 21           |
| 338348       | Ttc16       | 8          | 3            | 51            | 74          | 7           | 7             | 49             | 75           |
| 338349       | 530005l17r  | 6          | 12           | 23            | 89          | 6           | 8             | 24             | 78           |
| 338359       | Supv3l1     | 44         | 125          | 337           | 420         | 42          | 152           | 352            | 323          |
| 338362       | Ust         | 60         | 50           | 257           | 180         | 7           | 3             | 28             | 26           |
| 338365       | Slc41a2     | 10         | 2            | 33            | 22          | 48          | 26            | 61             | 90           |
| 338366       | Mia3        | 148        | 19           | 28            | 41          | 114         | 5             | 32             | 38           |
| 338367       | Myo1d       | 7          | 17           | 33            | 27          | 8           | 41            | 68             | 36           |
| 338372       | Map3k9      | 16         | 5            | 37            | 65          | 28          | 23            | 64             | 86           |
| 338374       | Ii28        | 28         | 15           | 23            | 37          | 29          | 13            | 20             | 33           |
| 338375       | Atp6v1g3    | 4          | 2            | 21            | 17          | 5           | 3             | 26             | 27           |
| 338403       | Cndp1       | 6          | 7            | 25            | 31          | 6           | 4             | 27             | 37           |
| 338521       | Fa2h        | 8          | 13           | 35            | 30          | 8           | 15            | 32             | 28           |
| 347708       | Dppa1       | 5          | 3            | 28            | 21          | 5           | 3             | 31             | 31           |
| 347711       | Pramel6     | 5          | 2            | 24            | 22          | 5           | 3             | 20             | 18           |
| 347712       | Pramel7     | 4          | 2            | 19            | 16          | 4           | 3             | 22             | 18           |

| NCBI Gene ID | Gene Symbol | Affy. CD4+ | Agilent CD4+ | Illumina CD4+ | Nimbl. CD4+ | Affy. CD19+ | Agilent CD19+ | Illumina CD19+ | Nimbl. CD19+ |
|--------------|-------------|------------|--------------|---------------|-------------|-------------|---------------|----------------|--------------|
| 347722       | Centg2      | 10         | 4            | 34            | 23          | 9           | 3             | 31             | 30           |
| 353025       | Caps2       | 4          | 2            | 25            | 20          | 4           | 3             | 27             | 23           |
| 353047       | Plekhm1     | 110        | 249          | 883           | 927         | 192         | 467           | 1215           | 1593         |
| 353130       | Prss33      | 14         | 66           | 23            | 31          | 14          | 44            | 19             | 26           |
| 353148       | Tas2r139    | 4          | 2            | 23            | 16          | 4           | 3             | 23             | 16           |
| 353155       | Gjc1        | 71         | 17           | 26            | 68          | 68          | 15            | 24             | 74           |
| 353156       | Egfl7       | 15         | 11           | 47            | 41          | 12          | 14            | 37             | 32           |
| 353165       | Tas2r136    | 5          | 2            | 20            | 14          | 5           | 6             | 24             | 15           |
| 353169       | Slc2a12     | 6          | 2            | 25            | 98          | 5           | 3             | 22             | 88           |
| 353172       | Gars        | 159        | 71           | 1684          | 1573        | 146         | 43            | 1564           | 985          |
| 353187       | Nr1d2       | 46         | 75           | 95            | 1495        | 42          | 51            | 88             | 1212         |
| 353188       | Adam32      | 4          | 4            | 18            | 52          | 4           | 3             | 19             | 39           |
| 353211       | 30083h22r   | 8          | 19           | 27            | 27          | 8           | 19            | 31             | 34           |
| 353242       | Mrpl21      | 55         | 296          | 27            | 7434        | 48          | 267           | 26             | 6859         |
| 353282       | Sfmbt2      | 28         | 86           | 197           | 906         | 7           | 13            | 28             | 27           |
| 353283       | Eras        | 5          | 4            | 25            | 59          | 5           | 2             | 29             | 64           |
| 353287       | Mrcl        | 13         | 12           | 31            | 28          | 14          | 10            | 29             | 30           |
| 353320       | Defb37      | 4          | 17           | 22            | 20          | 5           | 11            | 28             | 23           |
| 353328       | Muc6        | 9          | 68           | 28            | 75          | 9           | 76            | 27             | 79           |
| 353344       | Opn5        | 5          | 338          | 27            | 16          | 4           | 361           | 24             | 19           |
| 353346       | Gpr141      | 4          | 9            | 21            | 30          | 4           | 8             | 16             | 38           |
| 353499       | Tmc4        | 36         | 100          | 62            | 1704        | 22          | 61            | 42             | 894          |
| 353502       | Hcfc1r1     | 59         | 225          | 26            | 1135        | 59          | 322           | 35             | 1538         |
| 360013       | Myo18a      | 81         | 319          | 161           | 1727        | 102         | 455           | 225            | 2487         |
| 360211       | Defb34      | 10         | 9            | 29            | 125         | 11          | 8             | 31             | 148          |
| 360212       | Defb38      | 4          | 8            | 21            | 69          | 4           | 10            | 24             | 57           |
| 360213       | Trim46      | 14         | 49           | 55            | 155         | 13          | 45            | 39             | 185          |
| 360214       | Defb39      | 5          | 11           | 22            | 44          | 5           | 7             | 26             | 89           |
| 360216       | Zranb1      | 150        | 276          | 278           | 990         | 138         | 207           | 226            | 1161         |
| 360217       | Defb40      | 4          | 3            | 27            | 30          | 4           | 5             | 24             | 20           |
| 360220       | Speer4d     | 5          | 3            | 36            | 59          | 5           | 3             | 29             | 100          |
| 368204       | Ndg1        | 4          | 14           | 26            | 13          | 4           | 16            | 33             | 13           |
| 373864       | Col27a1     | 31         | 13           | 26            | 51          | 30          | 17            | 36             | 50           |
| 378430       | Nanos2      | 11         | 17           | 28            | 26          | 9           | 12            | 25             | 23           |
| 378435       | Mafa        | 16         | 8            | 30            | 61          | 15          | 6             | 29             | 58           |
| 378466       | 130040h23r  | 19         | 8            | 60            | 315         | 30          | 11            | 90             | 468          |
| 378702       | Serf2       | 235        | 8895         | 1754          | 5098        | 182         | 9761          | 1709           | 5305         |
| 380629       | Heca        | 311        | 118          | 164           | 695         | 187         | 51            | 110            | 435          |
| 380654       | 30485b16r   | 5          | 4            | 47            | 20          | 5           | 3             | 45             | 16           |
| 380674       | Ay053573    | 4          | 23           | 29            | 21          | 4           | 29            | 28             | 19           |
| 380684       | Nefh        | 39         | 87           | 60            | 429         | 23          | 16            | 27             | 54           |
| 380698       | Obscn       | 8          | 8            | 24            | 25          | 8           | 8             | 24             | 29           |
| 380714       | Rph3al      | 32         | 2            | 32            | 143         | 32          | 3             | 31             | 139          |
| 380752       | Tssc1       | 58         | 100          | 106           | 896         | 55          | 91            | 89             | 766          |
| 380753       | Atxn7l1     | 149        | 85           | 69            | 203         | 77          | 42            | 54             | 147          |
| 380780       | Serpina11   | 8          | 2            | 36            | 54          | 8           | 3             | 30             | 93           |
| 380839       | Serpina1c   | 4          | 2            | 30            | 19          | 4           | 258           | 30             | 914          |
| 380856       | Aa987161    | 35         | 55           | 26            | 816         | 41          | 75            | 26             | 1070         |
| 380921       | Dgkh        | 35         | 19           | 92            | 47          | 20          | 7             | 56             | 45           |
| 380924       | Olfm4       | 7          | 2            | 33            | 21          | 7           | 3             | 33             | 24           |
| 380928       | Lmo7        | 5          | 3            | 24            | 48          | 6           | 35            | 26             | 55           |

| NCBI Gene ID | Gene Symbol | Affy. CD4+ | Agilent CD4+ | Illumina CD4+ | Nimbl. CD4+ | Affy. CD19+ | Agilent CD19+ | Illumina CD19+ | Nimbl. CD19+ |
|--------------|-------------|------------|--------------|---------------|-------------|-------------|---------------|----------------|--------------|
| 381101       | Bc048355    | 10         | 22           | 28            | 113         | 10          | 23            | 27             | 76           |
| 381110       | Aw061290    | 6          | 7            | 36            | 42          | 6           | 10            | 52             | 97           |
| 381218       | 430402i18r  | 6          | 2            | 35            | 30          | 6           | 3             | 34             | 46           |
| 381236       | Ai747699    | 19         | 242          | 343           | 835         | 18          | 150           | 229            | 774          |
| 381286       | Serpinb3c   | 4          | 42           | 31            | 18          | 4           | 45            | 30             | 24           |
| 381293       | Kif14       | 6          | 7            | 29            | 21          | 6           | 8             | 28             | 24           |
| 381319       | 130211i03r  | 17         | 14           | 28            | 54          | 14          | 15            | 26             | 32           |
| 381337       | 700024g10r  | 5          | 15           | 39            | 57          | 5           | 19            | 36             | 46           |
| 381356       | 330434b04r  | 23         | 256          | 163           | 6265        | 26          | 222           | 181            | 6296         |
| 381463       | Nr1h5       | 4          | 3            | 26            | 30          | 4           | 5             | 23             | 42           |
| 381484       | Loc381484   | 5          | 3            | 30            | 13          | 6           | 3             | 26             | 20           |
| 381511       | Ppm2c       | 56         | 52           | 63            | 861         | 45          | 43            | 51             | 717          |
| 381522       | 330008n13r  | 8          | 28           | 41            | 49          | 8           | 22            | 46             | 52           |
| 381570       | Oog2        | 6          | 2            | 29            | 16          | 5           | 3             | 27             | 19           |
| 381572       | 330007a20r  | 5          | 3            | 33            | 23          | 4           | 3             | 34             | 25           |
| 381580       | Ccdc27      | 5          | 3            | 47            | 24          | 5           | 3             | 47             | 25           |
| 381629       | 510007c21r  | 87         | 16871        | 1280          | 7559        | 94          | 671           | 1799           | 8227         |
| 381650       | Thap6       | 30         | 48           | 28            | 620         | 43          | 70            | 34             | 837          |
| 381668       | 410025l10r  | 89         | 440          | 346           | 75          | 75          | 313           | 276            | 114          |
| 381693       | 330434e21r  | 7          | 28           | 27            | 42          | 8           | 32            | 22             | 91           |
| 381741       | Lrrc43      | 6          | 6            | 39            | 43          | 5           | 3             | 41             | 44           |
| 381760       | Ssbp1       | 147        | 1621         | 35            | 17725       | 159         | 1460          | 41             | 13992        |
| 381832       | Prmp5       | 4          | 2            | 26            | 45          | 4           | 3             | 24             | 70           |
| 381903       | Alg8        | 42         | 18           | 113           | 825         | 55          | 16            | 131            | 984          |
| 381944       | Dub1a       | 7          | 2            | 26            | 21          | 8           | 6             | 27             | 21           |
| 381970       | Abpe        | 4          | 2            | 41            | 17          | 4           | 3             | 40             | 17           |
| 381974       | Mrgprg      | 9          | 26           | 52            | 103         | 9           | 32            | 54             | 84           |
| 382018       | Unc13a      | 12         | 6            | 27            | 606         | 13          | 11            | 27             | 890          |
| 382034       | Gse1        | 98         | 333          | 36            | 387         | 98          | 272           | 36             | 285          |
| 382044       | Loc382044   | 9          | 2            | 24            | 22          | 9           | 3             | 21             | 38           |
| 382090       | 322501c03r  | 18         | 172          | 33            | 325         | 26          | 259           | 41             | 455          |
| 382206       | Ssx9        | 4          | 2            | 19            | 43          | 5           | 3             | 19             | 32           |
| 382207       | Phf16       | 33         | 37           | 53            | 42          | 29          | 33            | 47             | 39           |
| 382252       | 330080d01r  | 50         | 57           | 114           | 424         | 57          | 55            | 104            | 351          |
| 382253       | Cdkl5       | 7          | 6            | 27            | 45          | 7           | 4             | 27             | 27           |
| 382423       | 921506j03r  | 111        | 553          | 34            | 694         | 120         | 580           | 37             | 476          |
| 382522       | Hist3h2bb   | 16         | 239          | 23            | 145         | 16          | 351           | 23             | 146          |
| 382562       | Pfn4        | 7          | 2            | 48            | 88          | 6           | 3             | 45             | 47           |
| 382571       | Kcnf1       | 7          | 2            | 36            | 38          | 6           | 2             | 30             | 50           |
| 382913       | Neil2       | 5          | 2            | 80            | 51          | 6           | 3             | 68             | 53           |
| 382985       | Rrm2b       | 31         | 8            | 30            | 200         | 39          | 10            | 30             | 271          |
| 383295       | Ypel5       | 151        | 571          | 509           | 7204        | 153         | 740           | 606            | 6630         |
| 383548       | Serpinb3b   | 4          | 4            | 31            | 28          | 4           | 4             | 31             | 25           |
| 384009       | Glipr2      | 84         | 366          | 605           | 425         | 53          | 161           | 275            | 268          |
| 384061       | Fndc5       | 22         | 20           | 25            | 67          | 22          | 14            | 24             | 90           |
| 384185       | Arl9        | 7          | 5            | 25            | 42          | 8           | 7             | 25             | 46           |
| 384309       | Trim56      | 158        | 426          | 529           | 5621        | 130         | 330           | 325            | 4450         |
| 385211       | 700029i01r  | 7          | 304          | 20            | 1592        | 8           | 301           | 24             | 2546         |
| 386611       | Rnf133      | 5          | 7            | 22            | 50          | 5           | 12            | 23             | 42           |
| 386649       | Nsfl1c      | 141        | 944          | 525           | 13514       | 132         | 900           | 467            | 11271        |
| 386750       | Slitrk3     | 6          | 2            | 24            | 36          | 6           | 3             | 22             | 53           |

| NCBI Gene ID | Gene Symbol | Affy. CD4+ | Agilent CD4+ | Illumina CD4+ | Nimbl. CD4+ | Affy. CD19+ | Agilent CD19+ | Illumina CD19+ | Nimbl. CD19+ |
|--------------|-------------|------------|--------------|---------------|-------------|-------------|---------------|----------------|--------------|
| 386753       | Dbpht2      | 5          | 10           | 25            | 28          | 5           | 13            | 24             | 35           |
| 387285       | Hcrtr2      | 5          | 14           | 21            | 57          | 11          | 13            | 40             | 132          |
| 387339       | Tas2r102    | 5          | 2            | 18            | 36          | 4           | 3             | 22             | 22           |
| 387342       | Tas2r107    | 4          | 4            | 29            | 31          | 4           | 3             | 24             | 35           |
| 387344       | Tas2r110    | 5          | 4            | 44            | 31          | 5           | 6             | 43             | 28           |
| 387347       | Tas2r118    | 6          | 48           | 19            | 20          | 6           | 37            | 20             | 20           |
| 387355       | Tas2r130    | 5          | 2            | 32            | 15          | 5           | 3             | 33             | 19           |
| 387510       | Ifnk        | 5          | 3            | 20            | 31          | 4           | 3             | 24             | 59           |
| 387512       | Tas2r135    | 7          | 12           | 24            | 19          | 7           | 15            | 17             | 27           |
| 387609       | Zhx2        | 111        | 34           | 202           | 207         | 93          | 34            | 156            | 183          |
| 394252       | Serpib3d    | 4          | 2            | 21            | 21          | 4           | 3             | 24             | 29           |
| 394434       | Ugt1a9      | 6          | 9            | 28            | 46          | 7           | 10            | 27             | 64           |
| 396184       | Flrt1       | 20         | 4            | 25            | 29          | 18          | 3             | 27             | 19           |
| 399510       | Map4k5      | 41         | 146          | 44            | 409         | 97          | 408           | 44             | 1245         |
| 399549       | H2-m10.6    | 5          | 2            | 26            | 24          | 5           | 3             | 25             | 20           |
| 399558       | Flrt2       | 5          | 15           | 29            | 25          | 5           | 22            | 23             | 26           |
| 399566       | Btbd6       | 91         | 356          | 598           | 1041        | 46          | 126           | 202            | 376          |
| 399568       | Bc052040    | 41         | 101          | 207           | 1813        | 45          | 143           | 273            | 2730         |
| 399591       | 330488e11r  | 4          | 441          | 28            | 1241        | 4           | 706           | 39             | 2801         |
| 399603       | 330050i23r  | 32         | 185          | 141           | 87          | 26          | 98            | 137            | 48           |
| 403171       | 330517k23r  | 5          | 33           | 32            | 29          | 5           | 39            | 32             | 36           |
| 403175       | Tigd4       | 5          | 8            | 29            | 36          | 5           | 6             | 24             | 28           |
| 404195       | Cyp2c54     | 5          | 2            | 24            | 20          | 5           | 4             | 24             | 21           |
| 404222       | Olfir244    | 8          | 32           | 42            | 24          | 7           | 19            | 36             | 21           |
| 404238       | Mrgprb3     | 5          | 13           | 28            | 21          | 6           | 12            | 19             | 17           |
| 404239       | Mrgprb5     | 6          | 5            | 24            | 13          | 5           | 11            | 28             | 24           |
| 404289       | V1rd20      | 5          | 15           | 24            | 18          | 4           | 9             | 24             | 19           |
| 404290       | V1rd15      | 5          | 2            | 25            | 19          | 5           | 3             | 26             | 17           |
| 404322       | Olfir924    | 4          | 9            | 31            | 18          | 4           | 10            | 34             | 22           |
| 404325       | Olfir1057   | 5          | 3            | 24            | 20          | 5           | 3             | 26             | 19           |
| 404328       | Olfir1118   | 4          | 6            | 28            | 37          | 5           | 8             | 21             | 35           |
| 404337       | Olfir1383   | 14         | 3            | 40            | 21          | 11          | 3             | 41             | 28           |
| 406175       | Olfir27     | 4          | 8            | 18            | 25          | 4           | 5             | 27             | 20           |
| 407800       | Ecm2        | 4          | 3            | 42            | 20          | 5           | 3             | 41             | 26           |
| 408068       | 830402i07r  | 30         | 11           | 58            | 491         | 30          | 12            | 48             | 495          |
| 414102       | 230016k23r  | 6          | 24           | 35            | 56          | 6           | 25            | 33             | 76           |
| 432442       | Akap7       | 10         | 25           | 23            | 62          | 25          | 56            | 24             | 162          |
| 432486       | Gnptab      | 70         | 72           | 142           | 1514        | 104         | 100           | 197            | 2407         |
| 432508       | Cpsf6       | 168        | 332          | 134           | 1181        | 220         | 393           | 176            | 1648         |
| 432516       | Myo1a       | 9          | 46           | 100           | 92          | 9           | 39            | 97             | 98           |
| 432530       | Adcy1       | 8          | 36           | 27            | 21          | 7           | 39            | 23             | 25           |
| 432720       | Akr1c19     | 4          | 143          | 33            | 21          | 4           | 9             | 36             | 19           |
| 433256       | Acsl5       | 118        | 398          | 23            | 6046        | 122         | 295           | 21             | 5033         |
| 433449       | Olfir1196   | 6          | 6            | 23            | 26          | 5           | 13            | 20             | 37           |
| 433667       | Ankrd13c    | 97         | 391          | 35            | 1789        | 96          | 338           | 37             | 1714         |
| 433693       | 700059d21r  | 124        | 462          | 232           | 4569        | 117         | 378           | 180            | 3469         |
| 433702       | Au014645    | 245        | 430          | 272           | 1361        | 179         | 302           | 198            | 799          |
| 433759       | Hdac1       | 302        | 1348         | 841           | 2760        | 328         | 1335          | 908            | 2063         |
| 433766       | Trim63      | 8          | 3            | 40            | 42          | 9           | 3             | 35             | 23           |
| 433771       | 310028o11r  | 321        | 1672         | 98            | 5799        | 326         | 1460          | 107            | 7461         |
| 434204       | Whdc1       | 64         | 401          | 261           | 873         | 61          | 364           | 207            | 1348         |



| NCBI Gene ID | Gene Symbol | Affy. CD4+ | Agilent CD4+ | Illumina CD4+ | Nimbl. CD4+ | Affy. CD19+ | Agilent CD19+ | Illumina CD19+ | Nimbl. CD19+ |
|--------------|-------------|------------|--------------|---------------|-------------|-------------|---------------|----------------|--------------|
| 434234       | 510020h08r  | 51         | 890          | 214           | 728         | 15          | 272           | 68             | 121          |
| 434423       | Dppa5       | 6          | 54           | 23            | 63          | 6           | 48            | 19             | 63           |
| 435529       | Gpr111      | 5          | 2            | 40            | 22          | 5           | 3             | 39             | 22           |
| 435684       | Shf         | 18         | 31           | 65            | 41          | 14          | 24            | 49             | 43           |
| 435766       | Tnni3k      | 8          | 2            | 24            | 68          | 8           | 6             | 28             | 132          |
| 442799       | 330154j02r  | 6          | 6            | 38            | 47          | 6           | 3             | 36             | 51           |
| 442803       | 830005f24r  | 8          | 11           | 32            | 61          | 7           | 6             | 27             | 64           |
| 442822       | 530085l02r  | 7          | 24           | 30            | 22          | 6           | 37            | 24             | 24           |
| 442835       | 230002f21r  | 4          | 18           | 25            | 93          | 4           | 17            | 26             | 99           |
| 442837       | 230029f24r  | 4          | 2            | 25            | 16          | 4           | 3             | 20             | 23           |
| 448987       | Fbxl7       | 10         | 9            | 40            | 13          | 11          | 14            | 42             | 15           |
| 494124       | Calm5       | 5          | 2            | 69            | 18          | 4           | 3             | 65             | 18           |
| 497210       | Tpt1        | 3878       | 31125        | 11073         | 36584       | 3066        | 16545         | 12293          | 30892        |
| 499675       | Hist2h2ac   | 440        | 4483         | 2896          | 9147        | 635         | 8589          | 5224           | 14904        |
| 503610       | Zdhhc18     | 494        | 98           | 61            | 238         | 462         | 117           | 63             | 246          |
| 503692       | Aym1        | 13         | 6            | 36            | 62          | 14          | 5             | 35             | 68           |
| 504193       | Nptxr       | 20         | 12           | 31            | 28          | 19          | 12            | 32             | 37           |
| 544696       | 630037f22r  | 8          | 3            | 37            | 26          | 9           | 4             | 41             | 30           |
| 544717       | 310014b01r  | 17         | 297          | 81            | 1471        | 20          | 329           | 104            | 2080         |
| 545554       | Ankrd34     | 12         | 2            | 45            | 37          | 11          | 3             | 46             | 36           |
| 545622       | Ptpn3       | 10         | 38           | 18            | 39          | 8           | 33            | 19             | 20           |
| 545725       | Mterf       | 22         | 56           | 681           | 888         | 24          | 64            | 677            | 726          |
| 546071       | Mast3       | 163        | 1513         | 3144          | 204         | 161         | 1216          | 2667           | 180          |
| 546144       | Wdr72       | 5          | 2            | 47            | 28          | 5           | 3             | 47             | 26           |
| 547091       | Bc003267    | 4          | 74           | 21            | 823         | 4           | 62            | 18             | 930          |
| 547253       | Parp14      | 157        | 1722         | 682           | 8778        | 155         | 1745          | 686            | 9446         |
| 574402       | Gpr17       | 7          | 18           | 54            | 23          | 7           | 15            | 49             | 20           |
| 594844       | Tceal3      | 7          | 13           | 37            | 209         | 6           | 9             | 38             | 49           |
| 595136       | Ndufs5      | 68         | 4140         | 939           | 6861        | 62          | 4160          | 932            | 6507         |
| 606496       | Gsk3a       | 180        | 41           | 48            | 171         | 167         | 25            | 40             | 161          |
| 619331       | Zfp551      | 13         | 68           | 61            | 303         | 13          | 59            | 52             | 225          |
| 619441       | Tnfsf13     | 10         | 5            | 19            | 20          | 9           | 3             | 27             | 35           |
| 622402       | Akr1c12     | 5          | 76           | 170           | 468         | 4           | 4             | 26             | 34           |
| 623474       | l30016e03r  | 8          | 14           | 47            | 47          | 9           | 28            | 102            | 122          |
| 625249       | Gpx4        | 210        | 2542         | 2087          | 1877        | 193         | 1697          | 1628           | 1506         |
| 628850       | 030426l16r  | 58         | 3            | 22            | 535         | 54          | 3             | 24             | 899          |
| 632793       | V1ri9       | 8          | 8            | 29            | 33          | 8           | 23            | 30             | 34           |
| 641340       | Nrbf2       | 82         | 444          | 22            | 5146        | 84          | 526           | 25             | 5000         |
| 665698       | Ssty1       | 7          | 7            | 32            | 290         | 7           | 6             | 32             | 228          |
| 667055       | Unc93a      | 20         | 5            | 33            | 26          | 18          | 3             | 32             | 29           |
| 667663       | Myo3a       | 5          | 2            | 26            | 30          | 4           | 3             | 24             | 36           |
| 667666       | Rex2        | 4          | 33           | 33            | 43          | 3           | 38            | 30             | 33           |
| 668039       | Etohi1      | 97         | 77           | 24            | 885         | 57          | 51            | 26             | 870          |
| 668110       | 930481f22r  | 13         | 3            | 31            | 80          | 11          | 4             | 33             | 78           |
| 668319       | Rpl21       | 3755       | 650          | 8566          | 31892       | 3499        | 888           | 7345           | 31687        |
| 672214       | Rpl26       | 615        | 36273        | 10343         | 27644       | 581         | 35731         | 9296           | 28360        |
| 675812       | 830023i12r  | 8          | 4            | 26            | 150         | 10          | 4             | 28             | 156          |
| 1E+08        | Olfr239     | 66         | 28           | 34            | 22          | 57          | 23            | 31             | 20           |
| 1E+08        | 330013j21r  | 6          | 12           | 37            | 195         | 5           | 20            | 37             | 198          |
| 1E+08        | Xmr         | 7          | 129          | 21            | 1080        | 8           | 10            | 24             | 1207         |
| 1E+08        | Mthfs       | 39         | 709          | 138           | 5440        | 64          | 1184          | 257            | 8220         |

| NCBI<br>Gene ID | Gene<br>Symbol | Affy.<br>CD4+ | Agilent<br>CD4+ | Illumina<br>CD4+ | Nimbl.<br>CD4+ | Affy.<br>CD19+ | Agilent<br>CD19+ | Illumina<br>CD19+ | Nimbl.<br>CD19+ |
|-----------------|----------------|---------------|-----------------|------------------|----------------|----------------|------------------|-------------------|-----------------|
| 1E+08           | 330408d24r     | 17            | 2               | 24               | 93             | 12             | 3                | 23                | 87              |
| 1E+08           | Mif            | 238           | 1508            | 2453             | 8124           | 220            | 1320             | 2040              | 7540            |
| 1E+08           | Olfr157        | 6             | 11              | 24               | 17             | 7              | 4                | 25                | 18              |
| 1E+08           | Supt4h2        | 115           | 602             | 2528             | 9201           | 106            | 547              | 2033              | 8110            |
| 1E+08           | 700001e04r     | 7             | 12              | 32               | 168            | 6              | 3                | 33                | 111             |
| 1E+08           | V2r15          | 5             | 15              | 33               | 23             | 5              | 14               | 35                | 18              |
| 1E+08           | Amy2           | 5             | 5               | 34               | 30             | 5              | 4                | 38                | 34              |
| 1E+08           | 830417i10r     | 88            | 1239            | 994              | 1376           | 79             | 1098             | 834               | 1058            |
