# Supplementary material
Source: PubMed Central journal article supplement (PMC3140206)

Suppl. Figure S1

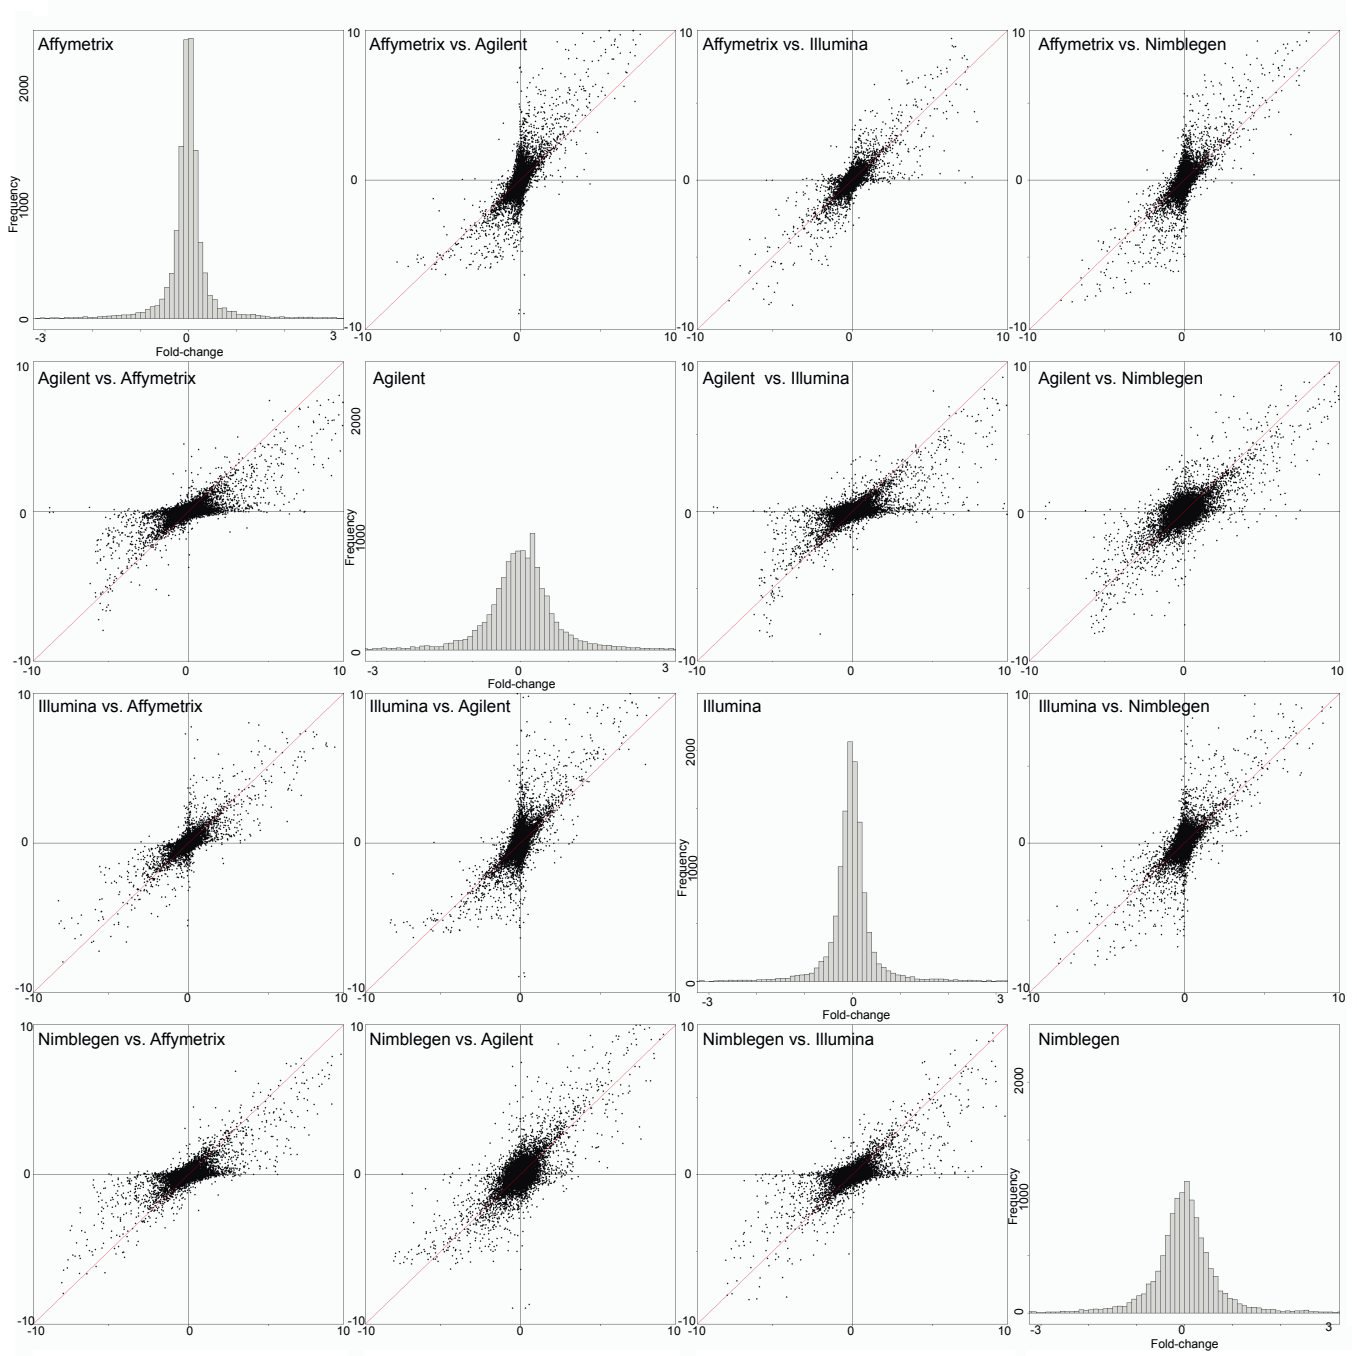

Supplement: NIHMS308302-supplement-Suppl_Figure_S1.pdf [file NIHMS308302-supplement-Suppl_Figure_S1.pdf]
